# Supplementary material for: Physiological, Transcriptomic Investigation on the Tea Plant Growth and Yield Motivation by Chitosan Oligosaccharides
Source: MDPI journal article supplement (doi:10.3390/horticulturae8010068), 2022-01-11
Supplement: s1 [file s1]

# Supplementary Material for

## Physiological, Transcriptomic Investigation on the Tea Plant Growth and Yield Motivation by Chitosan Oligosaccharides

Lina Ou, Qiuqiu Zhang, Dezhong Ji, Yingying Li, Xia Zhou \* and Linhong Jin \*

State Key Laboratory Breeding Base of Green Pesticide and Agricultural Bioengineering, Key Laboratory of Green Pesticide and Agricultural Bioengineering, Ministry of Education, Guizhou University, Huaxi District, Guiyang 550025, China; gs.lnou17@gzu.edu.cn (L.O.); gs.zhangqq18@gzu.edu.cn (Q.Z.); gs.dzji19@gzu.edu.cn (D.J.); gs.yingyingli17@gzu.edu.cn (Y.L.)

\*Correspondence: xzhou@gzu.edu.cn (X.Z.); lhjin@gzu.edu.cn (L.J.); Tel.: +86-851-362-0521; Fax: +86-851-362-2211

**Table S1: Verification of differential gene by RT qPCR**

| Geneid       | TreT3_1     | TreT3_2  | TreT3_3  | ConT3_1  | ConT3_2  | ConT3_3  | logFC    | logCPM   | F        | PValue     | FDR        |
|--------------|-------------|----------|----------|----------|----------|----------|----------|----------|----------|------------|------------|
| LOC114319469 | 6.347473512 | 6.698486 | 6.632465 | 0.05301  | 0.041739 | 0.053439 | 6.910858 | 3.337454 | 1862.979 | 1.6295E-61 | 4.1121E-59 |
| LOC114283520 | 84.28356421 | 88.45985 | 89.13702 | 1.537249 | 1.533146 | 1.588432 | 5.701988 | 5.526206 | 8747.96  | 9.7411E-91 | 4.4247E-87 |
| LOC114268500 | 0.698866715 | 0.590192 | 0.666244 | 0.018683 | 0.02942  | 0        | 5.149437 | 0.137588 | 140.5157 | 5.1764E-20 | 5.55E-19   |
| LOC114312375 | 4.192485334 | 4.942013 | 3.958675 | 0.119081 | 0.281281 | 0.360134 | 3.884127 | 0.239843 | 124.3269 | 1.3769E-18 | 1.3163E-17 |
| LOC114289957 | 0.057451837 | 0.129381 | 0.189374 | 2.506492 | 2.261334 | 2.487296 | -4.34678 | 0.438514 | 213.2136 | 2.3043E-25 | 3.8642E-24 |
| LOC114279513 | 3.516031456 | 3.526023 | 3.62176  | 25.81574 | 26.85292 | 29.6364  | -3.05605 | 4.124064 | 1843.675 | 2.5377E-61 | 6.2549E-59 |
| LOC114292261 | 0.009523859 | 0.064343 | 0.104643 | 1.644704 | 1.690296 | 1.557661 | -4.88418 | 1.442572 | 432.0309 | 1.1632E-33 | 3.5944E-32 |
| LOC114292883 | 0           | 0        | 0        | 2.439063 | 2.800637 | 2.612478 | -8.29363 | -0.45556 | 155.7154 | 4.3019E-21 | 5.0528E-20 |

**Table S2: The list of deferent expression genes**

| Geneid       | TreT3_1  | TreT3_2  | TreT3_3  | ConT3_1  | ConT3_2  | ConT3_3  | logFC    | logCPM   | F        | PValue   | FDR      |
|--------------|----------|----------|----------|----------|----------|----------|----------|----------|----------|----------|----------|
| LOC114257310 | 0.24878  | 0.315142 | 0.341681 | 1.158859 | 1.424307 | 1.02577  | -2.10054 | 0.584764 | 89.81518 | 3.82E-15 | 2.77E-14 |
| LOC114300415 | 2.007475 | 1.611145 | 1.947584 | 5.085632 | 4.126523 | 4.520185 | -1.39405 | 2.206354 | 129.4171 | 4.78E-19 | 4.75E-18 |
| LOC114287675 | 4.092202 | 2.429573 | 3.270017 | 0.946768 | 0.95844  | 0.613562 | 1.869976 | -0.09817 | 36.63448 | 3.3E-08  | 1.27E-07 |
| LOC114306306 | 3.496026 | 3.530167 | 3.667755 | 2.009048 | 1.38816  | 1.301983 | 1.108709 | 1.806289 | 59.34565 | 1.74E-11 | 9.16E-11 |
| LOC114277428 | 1.169134 | 0.849318 | 1.201701 | 0.377065 | 0.404848 | 0.44059  | 1.281364 | 0.356607 | 28.3087  | 7.63E-07 | 2.53E-06 |
| LOC114278209 | 3.090145 | 2.820657 | 2.973374 | 0.099716 | 0.078513 | 0.226177 | 4.285157 | 1.407388 | 324.8753 | 1.81E-31 | 4.78E-30 |
| LOC114292468 | 18.73468 | 16.95241 | 17.41008 | 6.606101 | 5.847562 | 6.949111 | 1.348334 | 4.000767 | 407.1715 | 5.51E-35 | 1.91E-33 |
| LOC114309044 | 0.158841 | 0.156498 | 0.123622 | 0.384993 | 0.274712 | 0.309274 | -1.21959 | 0.157731 | 25.17664 | 2.65E-06 | 8.25E-06 |
| LOC114309764 | 0.02662  | 0        | 0        | 1.693644 | 1.524021 | 1.170755 | -6.81725 | -0.24034 | 167.7087 | 3.43E-22 | 4.41E-21 |
| LOC114314266 | 1.15506  | 1.013699 | 0.970498 | 0.463168 | 0.461931 | 0.490262 | 1.040986 | 0.52576  | 22.56841 | 7.72E-06 | 2.27E-05 |
| LOC114319385 | 0        | 0.082656 | 0.040328 | 1.734726 | 1.996264 | 1.311574 | -5.31738 | -0.45586 | 124.527  | 1.32E-18 | 1.27E-17 |
| LOC114320895 | 0.918157 | 1.049389 | 1.016402 | 1.832185 | 1.818072 | 1.92608  | -1.0115  | 2.661373 | 98.95577 | 4.06E-16 | 3.17E-15 |
| LOC114323050 | 2.181502 | 2.199932 | 2.18619  | 0.958712 | 0.943572 | 0.741327 | 1.216347 | 1.974323 | 80.7681  | 3.96E-14 | 2.63E-13 |
| LOC114258076 | 2.976147 | 3.057911 | 3.167829 | 1.589218 | 1.464284 | 1.175995 | 1.028227 | 1.886562 | 55.82037 | 5.18E-11 | 2.6E-10  |
| LOC114261916 | 1.006184 | 0.879022 | 0.857744 | 0.031536 | 0.12415  | 0.214588 | 2.67202  | 0.023388 | 67.35396 | 1.62E-12 | 9.31E-12 |
| LOC114262111 | 2.135962 | 1.794566 | 1.696968 | 0.537618 | 0.493853 | 0.406477 | 1.87752  | 1.173531 | 97.88285 | 5.25E-16 | 4.07E-15 |
| LOC114266098 | 0.685273 | 0.667343 | 0.763113 | 1.195202 | 1.53751  | 1.285483 | -1.03906 | 1.765837 | 56.55674 | 4.12E-11 | 2.09E-10 |
| LOC114266975 | 0.733844 | 0.464798 | 0.743313 | 3.41837  | 3.512092 | 3.325214 | -2.49544 | 2.446493 | 396.9215 | 1.4E-34  | 4.67E-33 |
| LOC114268260 | 3.212429 | 2.802047 | 3.52963  | 0        | 0        | 0        | 8.767869 | 0.24181  | 183.1415 | 3.96E-23 | 5.56E-22 |
| LOC114270088 | 2.728181 | 2.591542 | 2.837203 | 0.938806 | 1.028431 | 1.002982 | 1.345407 | 2.331545 | 124.5685 | 1.31E-18 | 1.26E-17 |
| LOC114273442 | 1.975966 | 2.396083 | 1.670059 | 0        | 0        | 0        | 8.357781 | -0.12084 | 133.3508 | 2.97E-19 | 3.01E-18 |
| LOC114273986 | 6.084647 | 5.406467 | 5.070941 | 10.72221 | 10.24925 | 10.09786 | -1.00635 | 3.550394 | 194.4728 | 4.04E-24 | 6.1E-23  |
| LOC114281964 | 0.838528 | 0.662935 | 0.980134 | 2.594544 | 2.400356 | 2.917963 | -1.77564 | 1.578315 | 134.8738 | 1.58E-19 | 1.64E-18 |
| LOC114282374 | 2.517981 | 2.649931 | 1.989067 | 4.098575 | 4.593289 | 5.315474 | -1.08343 | 2.715532 | 106.4079 | 2.71E-16 | 2.14E-15 |

|              |          |          |          |          |          |          |          |          |          |          |          |
|--------------|----------|----------|----------|----------|----------|----------|----------|----------|----------|----------|----------|
| LOC114283267 | 96.78724 | 95.78301 | 94.85063 | 196.6775 | 184.1622 | 187.372  | -1.08837 | 8.37126  | 1677.172 | 1.34E-22 | 1.78E-21 |
| LOC114286337 | 5.439682 | 5.28783  | 6.105801 | 0.213418 | 0.280064 | 0.107573 | 4.677311 | 1.228815 | 307.5925 | 1.22E-30 | 3.04E-29 |
| LOC114289920 | 3.280251 | 3.005315 | 3.201201 | 7.036976 | 7.377851 | 6.524545 | -1.24425 | 2.930263 | 179.8111 | 4.36E-23 | 6.08E-22 |
| LOC114290741 | 1.467025 | 1.116126 | 1.154456 | 0.036038 | 0        | 0.027247 | 5.661771 | 0.118415 | 145.1848 | 2.1E-20  | 2.32E-19 |
| LOC114295084 | 1.113871 | 1.077151 | 1.043878 | 0.273946 | 0.168806 | 0.279165 | 2.065757 | 1.63974  | 157.7036 | 2.03E-21 | 2.45E-20 |
| LOC114293278 | 1.211865 | 1.443282 | 1.10107  | 2.584235 | 2.835293 | 2.594472 | -1.20169 | 1.377932 | 58.43031 | 2.31E-11 | 1.2E-10  |
| LOC114301067 | 2.521544 | 2.229165 | 2.28969  | 0.037882 | 0        | 0.028641 | 6.497164 | 0.872768 | 280.3316 | 2.94E-29 | 6.6E-28  |
| LOC114301520 | 4.631334 | 4.051038 | 4.651847 | 1.083984 | 0.910392 | 1.038118 | 2.035749 | 2.069968 | 208.5315 | 4.63E-25 | 7.55E-24 |
| LOC114293599 | 20.58986 | 24.78462 | 24.49703 | 8.0468   | 8.718964 | 7.758422 | 1.400265 | 3.539176 | 307.5915 | 1.01E-28 | 2.17E-27 |
| LOC114303891 | 21.59097 | 19.13201 | 20.00975 | 44.36791 | 42.32364 | 46.1892  | -1.23231 | 3.394524 | 268.9813 | 1.19E-28 | 2.53E-27 |
| LOC114305460 | 0.185294 | 0.226028 | 0.14421  | 0.561387 | 0.475168 | 0.498726 | -1.55843 | 0.489748 | 50.49549 | 2.83E-10 | 1.33E-09 |
| LOC114305737 | 1.376982 | 0.937499 | 1.266654 | 0.349271 | 0.22917  | 0.308085 | 1.917502 | -0.31762 | 32.94824 | 1.29E-07 | 4.65E-07 |
| LOC114305646 | 0.779192 | 0.845464 | 0.560377 | 0        | 0        | 0.038943 | 5.367518 | -0.13728 | 110.4208 | 3.26E-17 | 2.78E-16 |
| LOC114306142 | 0.327835 | 0.256348 | 0.310177 | 0.595945 | 0.79508  | 0.56322  | -1.23001 | 0.702755 | 37.48241 | 2.43E-08 | 9.5E-08  |
| LOC114306284 | 0.381876 | 0.566807 | 0.400511 | 1.199042 | 1.068307 | 1.240555 | -1.48603 | 0.538934 | 47.97821 | 6.46E-10 | 2.95E-09 |
| LOC114306296 | 1.1221   | 0.941869 | 1.34498  | 0.296695 | 0.233608 | 0.336483 | 1.859145 | 0.208149 | 47.16056 | 8.48E-10 | 3.82E-09 |
| LOC114306415 | 5.816744 | 5.65827  | 5.521305 | 1.063637 | 0.911367 | 0.946098 | 2.442206 | 2.545933 | 380.5509 | 6.46E-34 | 2.04E-32 |
| LOC114306460 | 1.005355 | 0.887265 | 0.985207 | 2.420277 | 2.877913 | 2.726175 | -1.58712 | 1.05009  | 79.45034 | 5.63E-14 | 3.68E-13 |
| LOC114306747 | 2.138565 | 2.127776 | 1.701529 | 4.658333 | 5.211463 | 4.991646 | -1.42388 | 3.529075 | 349.0297 | 6.22E-31 | 1.59E-29 |
| LOC114307107 | 3.552322 | 3.396472 | 3.886261 | 0.723684 | 0.504058 | 0.883867 | 2.247884 | 2.106618 | 237.9115 | 6.86E-27 | 1.28E-25 |
| LOC114307736 | 8.703405 | 8.644353 | 8.435107 | 3.209024 | 2.996758 | 3.554733 | 1.291634 | 2.141765 | 102.2784 | 1.85E-16 | 1.48E-15 |
| LOC114307937 | 190.6734 | 198.6623 | 185.6141 | 47.52369 | 45.64079 | 51.8166  | 1.882334 | 6.687535 | 2702.281 | 2.72E-55 | 4.27E-53 |
| LOC114307947 | 6.564696 | 6.93671  | 7.289476 | 2.736331 | 2.134546 | 2.145482 | 1.476955 | 3.32014  | 305.1761 | 1.6E-30  | 3.94E-29 |
| LOC114308313 | 0.827554 | 0.931824 | 0.938134 | 0.047757 | 0.037602 | 0.018054 | 4.568719 | 0.249834 | 145.0446 | 2.16E-20 | 2.38E-19 |
| LOC114308455 | 5.564278 | 5.206833 | 5.415793 | 1.708904 | 1.781923 | 2.095217 | 1.418487 | 2.127491 | 119.3055 | 4.01E-18 | 3.7E-17  |
| LOC114307218 | 0.366142 | 0.340127 | 0.271549 | 0.732139 | 0.681273 | 0.578709 | -1.11254 | 0.74997  | 32.38119 | 1.6E-07  | 5.7E-07  |

|              |          |          |          |          |          |          |          |          |          |          |          |
|--------------|----------|----------|----------|----------|----------|----------|----------|----------|----------|----------|----------|
| LOC114309119 | 3.885135 | 4.289295 | 4.601932 | 0.895729 | 0.732393 | 1.015851 | 2.159927 | 2.053295 | 220.7682 | 7.64E-26 | 1.32E-24 |
| LOC114309291 | 1.26752  | 1.050222 | 1.182461 | 0.499952 | 0.3423   | 0.624519 | 1.147044 | 1.121118 | 39.45154 | 1.2E-08  | 4.83E-08 |
| LOC114310298 | 0.338579 | 0.508318 | 0.578683 | 0.854827 | 0.807674 | 0.982389 | -1.01062 | 0.192669 | 17.78001 | 5.94E-05 | 0.000155 |
| LOC114310308 | 3.273234 | 3.333757 | 2.891609 | 8.70098  | 7.227539 | 8.658363 | -1.47191 | 3.402894 | 351.2322 | 2.18E-32 | 6.16E-31 |
| LOC114310481 | 1.982238 | 1.899154 | 1.967812 | 0.284475 | 0.124437 | 0.215083 | 3.145951 | 0.98264  | 177.0248 | 6.94E-23 | 9.5E-22  |
| LOC114310530 | 1.866065 | 2.568115 | 2.581888 | 0.690998 | 0.445147 | 0.759917 | 1.771027 | 0.479636 | 52.13269 | 1.67E-10 | 8.03E-10 |
| LOC114310896 | 0.484645 | 0.353106 | 0.501176 | 0.958732 | 1.040502 | 0.901188 | -1.21105 | 0.629723 | 35.29686 | 5.39E-08 | 2.03E-07 |
| LOC114310956 | 0.595342 | 0.54144  | 0.628969 | 0.374617 | 0.311347 | 0.157354 | 1.000147 | 0.299652 | 16.59674 | 0.0001   | 0.000252 |
| LOC114310808 | 1.275242 | 1.568875 | 1.219529 | 3.5631   | 3.920892 | 4.0247   | -1.61513 | 1.758058 | 129.4742 | 4.72E-19 | 4.69E-18 |
| LOC114310978 | 3.028962 | 2.672226 | 2.95064  | 7.398247 | 7.165954 | 8.540597 | -1.52345 | 3.961676 | 525.3632 | 7.13E-39 | 3.32E-37 |
| LOC114311174 | 27.57471 | 28.02303 | 26.85781 | 2.208762 | 2.230147 | 2.377263 | 3.486906 | 4.936932 | 3455.661 | 4.63E-73 | 2.63E-70 |
| LOC114311389 | 14.04247 | 13.57954 | 11.61717 | 6.426723 | 5.580392 | 5.721873 | 1.050435 | 3.11662  | 136.3328 | 1.39E-19 | 1.45E-18 |
| LOC114311698 | 1.037808 | 1.252038 | 1.384629 | 0.404261 | 0.212201 | 0.356591 | 1.811141 | -0.46033 | 26.79977 | 1.38E-06 | 4.45E-06 |
| LOC114311707 | 1.702197 | 1.813066 | 1.769179 | 4.432362 | 5.465304 | 5.880363 | -1.6969  | 1.238488 | 100.5766 | 2.76E-16 | 2.18E-15 |
| LOC114311586 | 33.67629 | 35.88051 | 36.00676 | 13.95372 | 15.97296 | 15.66267 | 1.100881 | 5.25473  | 596.001  | 1.33E-38 | 6.02E-37 |
| LOC114311676 | 0.167613 | 0.142699 | 0.170688 | 0.022294 | 0.017554 | 0.005619 | 3.311156 | -0.40216 | 63.86808 | 4.49E-12 | 2.48E-11 |
| LOC114311828 | 4.004545 | 3.709621 | 3.900674 | 0.25814  | 0.0813   | 0.195172 | 4.350165 | 1.173586 | 279.7372 | 3.16E-29 | 7.07E-28 |
| LOC114312257 | 1.777362 | 1.519591 | 1.756294 | 0.296934 | 0.411926 | 0.400898 | 2.060499 | 2.990309 | 396.2771 | 1.52E-34 | 5.05E-33 |
| LOC114313043 | 4.205089 | 4.02972  | 4.502341 | 1.301124 | 0.960432 | 1.131301 | 1.816191 | 3.173529 | 387.6358 | 3.31E-34 | 1.07E-32 |
| LOC114312380 | 1.647925 | 1.3254   | 2.155529 | 3.994178 | 2.695613 | 3.882699 | -1.13154 | 0.077551 | 20.19615 | 2.09E-05 | 5.8E-05  |
| LOC114313073 | 0.781239 | 0.858728 | 0.776629 | 0.135253 | 0.186363 | 0.204521 | 2.047528 | -0.15204 | 42.30035 | 4.43E-09 | 1.86E-08 |
| LOC114313174 | 165.8568 | 166.4411 | 167.5655 | 3.092716 | 2.391225 | 2.991351 | 5.781608 | 7.331231 | 8062.892 | 6.47E-18 | 5.86E-17 |
| LOC114314453 | 32.47648 | 30.59584 | 32.21505 | 9.819689 | 8.989258 | 9.34755  | 1.656747 | 4.235741 | 676.8574 | 2.13E-43 | 1.36E-41 |
| LOC114314280 | 1.493605 | 1.807931 | 2.133413 | 0.678777 | 0.801669 | 0.667164 | 1.21638  | 0.155545 | 22.0233  | 9.69E-06 | 2.81E-05 |
| LOC114314124 | 0.947594 | 0.640193 | 0.832929 | 1.119662 | 1.695354 | 1.823322 | -1.05807 | -0.30037 | 13.59154 | 0.00039  | 0.000899 |
| LOC114314212 | 1.642724 | 1.703031 | 1.669758 | 0        | 0        | 0        | 10.48013 | 1.832058 | 619.5576 | 2.31E-41 | 1.29E-39 |

|              |          |          |          |          |          |          |          |          |          |          |          |
|--------------|----------|----------|----------|----------|----------|----------|----------|----------|----------|----------|----------|
| LOC114314602 | 11.47546 | 11.40827 | 11.34118 | 5.296148 | 4.544459 | 4.674357 | 1.138803 | 4.352385 | 353.5426 | 9.1E-33  | 2.64E-31 |
| LOC114314639 | 0.330543 | 0.263917 | 0.402801 | 0.109249 | 0.094621 | 0.06608  | 1.798373 | 0.212798 | 43.98329 | 2.48E-09 | 1.07E-08 |
| LOC114314670 | 0.66629  | 0.847046 | 0.755696 | 0.273496 | 0.307631 | 0.206782 | 1.411753 | -0.30562 | 20.17496 | 2.11E-05 | 5.85E-05 |
| LOC114315067 | 0.449951 | 0.298026 | 0.523461 | 0.192454 | 0.189415 | 0.163697 | 1.119534 | -0.35598 | 12.63432 | 0.000609 | 0.001357 |
| LOC114314965 | 0.96685  | 1.209634 | 0.944283 | 0.390569 | 0.384401 | 0.258385 | 1.49267  | -0.19659 | 24.01476 | 4.25E-06 | 1.29E-05 |
| LOC114315181 | 1.150682 | 0.874574 | 0.995638 | 1.856414 | 2.038115 | 2.095484 | -1.09198 | 1.685564 | 59.99041 | 1.43E-11 | 7.59E-11 |
| LOC114315346 | 1.746869 | 2.021609 | 1.635008 | 0.617457 | 0.32411  | 0.533532 | 1.785293 | 1.155861 | 86.07072 | 9.91E-15 | 6.9E-14  |
| LOC114315423 | 4.382503 | 3.743557 | 3.354063 | 0.439537 | 0.346077 | 0.24924  | 3.388273 | 1.12872  | 209.4378 | 4.04E-25 | 6.63E-24 |
| LOC114315450 | 0.433835 | 0.346019 | 0.407158 | 0.03286  | 0.051745 | 0.037266 | 3.122635 | -0.25116 | 68.70959 | 1.1E-12  | 6.4E-12  |
| LOC114315971 | 16.71467 | 18.37888 | 18.40822 | 5.991267 | 6.233605 | 5.931902 | 1.450022 | 3.19539  | 276.4448 | 4.71E-29 | 1.04E-27 |
| LOC114315997 | 0.629735 | 0.588386 | 0.691916 | 0.073069 | 0.076709 | 0.092075 | 2.832501 | -0.12412 | 68.08417 | 1.31E-12 | 7.6E-12  |
| LOC114316460 | 4.095199 | 3.565349 | 3.954516 | 1.573289 | 1.555997 | 1.755261 | 1.140733 | 2.97636  | 148.0073 | 1.23E-20 | 1.38E-19 |
| LOC114316503 | 9.792525 | 9.440113 | 8.532059 | 3.185453 | 4.376913 | 4.580729 | 1.066722 | 2.557676 | 88.73922 | 5.29E-15 | 3.79E-14 |
| LOC114316566 | 0.026479 | 0.119263 | 0.058188 | 1.588445 | 2.046581 | 1.419335 | -4.69012 | 0.029485 | 163.9085 | 6.68E-22 | 8.4E-21  |
| LOC114316694 | 0.339341 | 0.267468 | 0.298279 | 1.973957 | 1.505658 | 1.305893 | -2.45387 | -0.19846 | 65.49912 | 2.78E-12 | 1.57E-11 |
| LOC114316867 | 0.667067 | 0.361114 | 0.803409 | 1.329207 | 1.432152 | 1.110759 | -1.17131 | 1.195115 | 41.8581  | 1.74E-08 | 6.92E-08 |
| LOC114316981 | 0.366898 | 0.29338  | 0.33886  | 0.019332 | 0.030443 | 0.021925 | 3.637648 | 0.175479 | 113.2011 | 1.52E-17 | 1.34E-16 |
| LOC114317250 | 0.934687 | 0.594866 | 0.692095 | 1.772967 | 1.366892 | 1.340487 | -1.08251 | 0.770961 | 30.35792 | 3.45E-07 | 1.18E-06 |
| LOC114317334 | 0.349121 | 0.417679 | 0.407568 | 0.991624 | 0.812002 | 1.10961  | -1.41419 | -0.01444 | 29.60791 | 4.6E-07  | 1.56E-06 |
| LOC114317452 | 1.814056 | 1.730556 | 1.854764 | 0.687006 | 0.865481 | 0.865708 | 1.033878 | 0.723983 | 25.87428 | 2E-06    | 6.33E-06 |
| LOC114317897 | 1.71418  | 2.031751 | 2.577341 | 1.066025 | 0.58109  | 0.123998 | 1.814915 | -0.00847 | 31.10521 | 8.5E-07  | 2.8E-06  |
| LOC114318309 | 1.705228 | 1.551848 | 1.360289 | 0.339704 | 0.367774 | 0.32105  | 2.053735 | 0.400817 | 64.92092 | 3.29E-12 | 1.84E-11 |
| LOC114318130 | 1.053425 | 0.874008 | 1.248819 | 0.503931 | 0.595168 | 0.342906 | 1.038911 | -0.10861 | 13.40126 | 0.000426 | 0.000976 |
| LOC114318620 | 13.83873 | 13.4551  | 15.20519 | 0.257574 | 0        | 0        | 7.383932 | 2.199472 | 692.1307 | 3.94E-41 | 2.13E-39 |
| LOC114318452 | 3.814366 | 2.791729 | 1.990726 | 6.933836 | 6.960823 | 7.47051  | -1.40371 | 0.705663 | 47.45419 | 7.69E-10 | 3.48E-09 |
| LOC114318850 | 0.816083 | 0.814881 | 0.862828 | 0.223924 | 0.17631  | 0.169302 | 2.031962 | 0.14071  | 52.73949 | 1.37E-10 | 6.66E-10 |

|              |          |          |          |          |          |          |          |          |          |          |          |
|--------------|----------|----------|----------|----------|----------|----------|----------|----------|----------|----------|----------|
| LOC114319603 | 335.7335 | 338.6404 | 338.6764 | 699.591  | 671.9315 | 696.7464 | -1.13483 | 10.51836 | 4356.278 | 1.59E-19 | 1.65E-18 |
| LOC114319860 | 15.92401 | 14.88911 | 15.53513 | 6.617679 | 6.017331 | 5.874991 | 1.226025 | 3.78617  | 322.2868 | 2.4E-31  | 6.29E-30 |
| LOC114320154 | 1.711382 | 1.986305 | 1.706795 | 4.235728 | 4.277181 | 4.523314 | -1.37989 | 2.839184 | 202.9143 | 1.09E-24 | 1.71E-23 |
| LOC114320773 | 2.142943 | 2.621476 | 1.976652 | 5.482539 | 5.869289 | 5.454187 | -1.42634 | 2.187597 | 132.8098 | 2.39E-19 | 2.44E-18 |
| LOC114320825 | 1.243604 | 1.615726 | 1.611651 | 0.115931 | 0.4564   | 0.350607 | 2.07974  | -0.06321 | 43.97412 | 2.49E-09 | 1.07E-08 |
| LOC114321705 | 9.69329  | 9.92598  | 8.528055 | 20.84474 | 22.29379 | 21.02148 | -1.29444 | 4.744739 | 553.1201 | 4.36E-38 | 1.91E-36 |
| LOC114321452 | 0.589345 | 0.51934  | 0.450462 | 0.116448 | 0.091688 | 0.088043 | 2.294595 | -0.26363 | 45.45686 | 1.5E-09  | 6.6E-09  |
| LOC114321809 | 1.296374 | 1.313743 | 1.408554 | 0.026184 | 0.020617 | 0.039594 | 5.314426 | 0.632995 | 217.7478 | 1.18E-25 | 2.03E-24 |
| LOC114321857 | 1.904182 | 1.685249 | 1.790992 | 3.151681 | 3.361728 | 3.604886 | -1.02    | 3.41336  | 186.7938 | 1.38E-23 | 2.01E-22 |
| LOC114322046 | 0.596189 | 0.539965 | 0.612337 | 0        | 0        | 0        | 8.12514  | -0.32774 | 116.0084 | 1.08E-17 | 9.61E-17 |
| LOC114322443 | 10.81297 | 10.32721 | 10.73115 | 4.168086 | 4.223314 | 4.089884 | 1.246986 | 5.135559 | 789.2342 | 4.74E-46 | 3.66E-44 |
| LOC114322850 | 0.102954 | 0.09419  | 0.07777  | 0.491276 | 0.534172 | 0.539471 | -2.60213 | 0.559446 | 128.4144 | 5.88E-19 | 5.81E-18 |
| LOC114322763 | 0.890076 | 0.826261 | 1.00036  | 0.296427 | 0.311196 | 0.466916 | 1.207887 | 1.529782 | 57.81936 | 2.79E-11 | 1.44E-10 |
| LOC114323249 | 0.28959  | 0.253616 | 0.194446 | 0.877373 | 0.759895 | 0.796026 | -1.80126 | 0.044899 | 47.95555 | 6.51E-10 | 2.97E-09 |
| LOC114323277 | 23.83979 | 23.52471 | 24.11732 | 8.824882 | 8.62348  | 8.900273 | 1.334399 | 5.804855 | 1266.282 | 1.88E-54 | 2.77E-52 |
| LOC114323223 | 1.741171 | 1.913122 | 1.573677 | 0.076576 | 0.060293 | 0.038598 | 4.780847 | 1.032427 | 269.3409 | 1.13E-28 | 2.42E-27 |
| LOC114323507 | 22.96888 | 24.04946 | 23.61615 | 5.171284 | 5.12732  | 5.854433 | 2.018957 | 4.832356 | 1342.41  | 1.65E-55 | 2.67E-53 |
| LOC114323827 | 0.39198  | 0.551711 | 0.592192 | 0.02969  | 0.046753 | 0.157132 | 2.481478 | -0.6233  | 35.73283 | 4.59E-08 | 1.74E-07 |
| LOC114323874 | 5.281127 | 4.786686 | 5.730736 | 2.080527 | 1.708343 | 1.887628 | 1.379608 | 2.727406 | 168.1776 | 3.16E-22 | 4.07E-21 |
| LOC114323995 | 10.02603 | 10.66557 | 11.2899  | 2.064218 | 2.735254 | 3.34978  | 1.836845 | 2.865179 | 290.1559 | 4.92E-29 | 1.08E-27 |
| LOC114324069 | 1.848417 | 1.306871 | 1.912855 | 0.039071 | 0.030763 | 0.059081 | 5.078108 | 0.417689 | 172.3276 | 1.54E-22 | 2.04E-21 |
| LOC114256410 | 1.57094  | 1.375792 | 1.569143 | 0.605752 | 0.499661 | 0.610654 | 1.293365 | 1.044957 | 48.66768 | 5.15E-10 | 2.37E-09 |
| LOC114256970 | 0.649779 | 0.58532  | 0.660394 | 0.088589 | 0.046501 | 0.044653 | 3.298392 | -0.41247 | 64.05479 | 4.25E-12 | 2.35E-11 |
| LOC114257187 | 2.664406 | 2.695535 | 2.541125 | 0.122929 | 0.09679  | 0.204475 | 4.071956 | 1.669256 | 379.108  | 7.41E-34 | 2.33E-32 |
| LOC114257781 | 2.569732 | 1.888398 | 2.258777 | 0.024586 | 0.038716 | 0.037177 | 5.849603 | 1.39795  | 389.2254 | 2.85E-34 | 9.28E-33 |
| LOC114257853 | 8.28172  | 8.426384 | 9.072064 | 1.451054 | 1.142511 | 1.234236 | 2.656039 | 2.580268 | 435.7272 | 4.53E-36 | 1.71E-34 |

|              |          |          |          |          |          |          |          |          |          |          |          |
|--------------|----------|----------|----------|----------|----------|----------|----------|----------|----------|----------|----------|
| LOC114258211 | 2.240321 | 2.036471 | 2.121791 | 0.816622 | 0.718134 | 0.649497 | 1.458528 | 2.888007 | 212.1384 | 2.7E-25  | 4.52E-24 |
| LOC114258665 | 0.257405 | 0.386449 | 0.471368 | 0.904637 | 0.515789 | 0.919819 | -1.17    | 0.083432 | 20.63894 | 1.77E-05 | 4.96E-05 |
| LOC114258690 | 19.85265 | 20.52622 | 20.62389 | 8.649048 | 9.427134 | 8.6934   | 1.080337 | 4.551059 | 358.6708 | 5.44E-33 | 1.6E-31  |
| LOC114258829 | 2.878162 | 2.586097 | 2.571412 | 0.792725 | 0.811415 | 0.799141 | 1.634339 | 1.88053  | 130.2308 | 4.05E-19 | 4.04E-18 |
| LOC114259438 | 0.119842 | 0.089961 | 0.160936 | 0.580935 | 0.457408 | 0.475829 | -2.09913 | -0.41652 | 43.6804  | 2.75E-09 | 1.18E-08 |
| LOC114259504 | 9.194013 | 10.79824 | 10.34352 | 3.998343 | 3.148161 | 3.567171 | 1.402976 | 2.245826 | 122.2743 | 2.12E-18 | 2E-17    |
| LOC114259868 | 3.294943 | 3.301497 | 3.955208 | 1.187369 | 1.308853 | 1.077281 | 1.454351 | 2.305001 | 134.4905 | 1.71E-19 | 1.77E-18 |
| LOC114259961 | 3.05368  | 2.88699  | 3.007024 | 0.680789 | 0.700962 | 0.791883 | 1.92235  | 1.027477 | 94.81606 | 1.11E-15 | 8.34E-15 |
| LOC114260176 | 1.169888 | 1.137661 | 1.304881 | 0.483329 | 0.50741  | 0.389793 | 1.284436 | 0.59328  | 34.45335 | 7.35E-08 | 2.73E-07 |
| LOC114260156 | 8.350672 | 7.428909 | 7.899809 | 3.18673  | 3.373755 | 3.581526 | 1.11284  | 3.835197 | 275.7412 | 5.14E-29 | 1.13E-27 |
| LOC114260204 | 0.806247 | 0.378264 | 0.701304 | 0.061067 | 0.360617 | 0.138513 | 1.5832   | -0.25672 | 19.18365 | 8.26E-05 | 0.00021  |
| LOC114260224 | 2.037369 | 1.973504 | 1.82798  | 0.064691 | 0.012734 | 0.012228 | 5.997052 | 1.778008 | 510.6144 | 1.17E-38 | 5.36E-37 |
| LOC114260074 | 1.128286 | 0.929596 | 0.876857 | 2.951471 | 3.387364 | 3.630944 | -1.86974 | 1.270733 | 121.9897 | 2.26E-18 | 2.12E-17 |
| LOC114260398 | 51.82681 | 48.47626 | 49.95462 | 10.57506 | 9.424662 | 10.89073 | 2.17776  | 5.996726 | 3114.159 | 4.12E-69 | 1.8E-66  |
| LOC114261056 | 5.087911 | 4.575576 | 5.16979  | 9.514922 | 9.956751 | 10.28811 | -1.11136 | 4.333976 | 354.3216 | 8.41E-33 | 2.44E-31 |
| LOC114261097 | 1.518254 | 1.535698 | 1.328881 | 0.187113 | 0.736632 | 0.671984 | 1.276577 | 0.34612  | 25.87137 | 2.28E-06 | 7.16E-06 |
| LOC114261735 | 0.447056 | 0.289178 | 0.39714  | 0.103745 | 0.136142 | 0.122015 | 1.530549 | 1.29972  | 72.56178 | 4.67E-13 | 2.82E-12 |
| LOC114261784 | 4.775874 | 5.761739 | 4.122998 | 0        | 0        | 0        | 8.056106 | -0.38523 | 108.0289 | 6.3E-17  | 5.24E-16 |
| LOC114261817 | 0.31054  | 0.287227 | 0.329018 | 2.54028  | 2.365234 | 2.606567 | -3.11575 | 1.96152  | 429.1346 | 7.96E-36 | 2.94E-34 |
| LOC114262289 | 65.56247 | 65.57139 | 65.42525 | 24.76602 | 23.84107 | 25.6199  | 1.299672 | 6.35369  | 1435.559 | 1.8E-56  | 3.21E-54 |
| LOC114262314 | 55.96432 | 55.08635 | 55.15972 | 17.59152 | 17.02605 | 17.18823 | 1.576938 | 6.176758 | 2011.932 | 6.15E-63 | 1.76E-60 |
| LOC114262323 | 22.53815 | 21.98887 | 21.61223 | 3.379328 | 3.04088  | 3.650011 | 2.608673 | 4.408846 | 1523.176 | 8.21E-58 | 1.64E-55 |
| LOC114262347 | 4.45617  | 4.650493 | 4.537922 | 1.629983 | 1.555629 | 2.502106 | 1.135735 | 1.867812 | 63.81863 | 4.56E-12 | 2.52E-11 |
| LOC114263199 | 1.17743  | 1.10482  | 1.209841 | 0.217999 | 0.390103 | 0.194791 | 1.995249 | 1.056353 | 96.63156 | 7.11E-16 | 5.43E-15 |
| LOC114263623 | 8.297991 | 8.045024 | 8.235913 | 2.005159 | 2.224666 | 2.756437 | 1.691737 | 2.667546 | 230.6274 | 1.88E-26 | 3.41E-25 |
| LOC114263640 | 1.092153 | 1.360191 | 1.05454  | 3.669869 | 2.723739 | 3.57069  | -1.60624 | 2.05657  | 145.5381 | 2.54E-20 | 2.79E-19 |

|              |          |          |          |          |          |          |          |          |          |          |          |
|--------------|----------|----------|----------|----------|----------|----------|----------|----------|----------|----------|----------|
| LOC114263782 | 0.900676 | 1.04723  | 0.968097 | 0.427113 | 0.420368 | 0.457481 | 1.045956 | 1.171695 | 36.12694 | 3.97E-08 | 1.52E-07 |
| LOC114264024 | 2.306679 | 1.786592 | 2.065645 | 4.992975 | 5.248096 | 5.259397 | -1.43385 | 3.052808 | 255.9581 | 6.21E-28 | 1.25E-26 |
| LOC114264084 | 0.076352 | 0.200601 | 0.181764 | 0.670837 | 0.25499  | 0.542179 | -1.76023 | -0.32937 | 29.25347 | 1E-06    | 3.28E-06 |
| LOC114264011 | 0.540242 | 0.337951 | 0.560609 | 1.418536 | 1.546487 | 1.650018 | -1.77739 | 0.084026 | 48.06449 | 6.28E-10 | 2.87E-09 |
| LOC114263898 | 2.508775 | 2.570954 | 3.128158 | 0.204967 | 0.121038 | 0.232453 | 3.744742 | 0.744083 | 177.2933 | 6.64E-23 | 9.1E-22  |
| LOC114264677 | 0.777304 | 0.510558 | 0.825588 | 1.413    | 1.353601 | 1.584684 | -1.14261 | 1.360317 | 50.76999 | 2.59E-10 | 1.23E-09 |
| LOC114264264 | 79.5944  | 80.61909 | 78.32838 | 450.6219 | 430.5026 | 450.6477 | -2.58592 | 8.033583 | 7709.644 | 2.55E-88 | 9.02E-85 |
| LOC114264741 | 0.980077 | 0.753227 | 0.76918  | 1.951282 | 1.759037 | 1.796024 | -1.22749 | 1.402679 | 62.0436  | 7.72E-12 | 4.18E-11 |
| LOC114265161 | 5.895132 | 6.29604  | 5.698849 | 10.30236 | 11.95032 | 11.371   | -1.02317 | 3.375222 | 179.3918 | 4.67E-23 | 6.49E-22 |
| LOC114265262 | 843.927  | 802.8499 | 826.683  | 2196.369 | 2132.916 | 2192.764 | -1.50422 | 10.50794 | 7518.724 | 1.58E-32 | 4.48E-31 |
| LOC114265293 | 7.265387 | 6.866515 | 6.922774 | 0.909346 | 0.90351  | 1.047664 | 2.766221 | 3.32193  | 870.7511 | 9.06E-48 | 7.85E-46 |
| LOC114265955 | 10.74187 | 10.92736 | 10.87533 | 0.990721 | 1.08202  | 1.304804 | 3.144106 | 3.345249 | 1036.061 | 7.58E-51 | 8.57E-49 |
| LOC114266235 | 4.759028 | 4.362798 | 5.228942 | 0.535907 | 0.602793 | 0.463066 | 3.053207 | 1.953965 | 338.7451 | 4.16E-32 | 1.15E-30 |
| LOC114266451 | 0.718686 | 0.867042 | 1.240879 | 1.866348 | 1.983824 | 1.552198 | -1.03718 | -0.21803 | 13.7699  | 0.000359 | 0.000832 |
| LOC114266582 | 1.789176 | 2.03228  | 1.862377 | 3.65182  | 3.504297 | 4.119975 | -1.09855 | 2.464405 | 98.13533 | 4.94E-16 | 3.84E-15 |
| LOC114266761 | 13.14821 | 12.42152 | 12.80823 | 25.18998 | 27.48966 | 26.62627 | -1.15356 | 5.844591 | 939.0425 | 4.22E-49 | 4.11E-47 |
| LOC114266792 | 2.008899 | 1.319509 | 2.023323 | 0.304318 | 0        | 0.076695 | 3.785948 | -0.6801  | 55.05842 | 6.72E-11 | 3.34E-10 |
| LOC114266946 | 2.819754 | 2.938093 | 3.098181 | 0.076505 | 0.020079 | 0        | 6.490018 | 1.7181   | 498.905  | 2.83E-38 | 1.26E-36 |
| LOC114267560 | 2.127443 | 2.359743 | 2.128181 | 0.981258 | 1.045296 | 0.916464 | 1.058482 | 0.681    | 26.05506 | 1.86E-06 | 5.91E-06 |
| LOC114267501 | 1.168752 | 0.915487 | 0.893327 | 2.863569 | 2.181946 | 2.933304 | -1.50609 | 0.175136 | 38.02059 | 2E-08    | 7.89E-08 |
| LOC114267721 | 0.884748 | 1.025525 | 0.686195 | 0.378427 | 0.260716 | 0.286117 | 1.396143 | -0.37056 | 18.57226 | 4.2E-05  | 0.000112 |
| LOC114267782 | 1.299978 | 1.258844 | 1.228372 | 5.151618 | 4.949322 | 5.109932 | -2.10564 | 1.903237 | 231.0828 | 1.76E-26 | 3.21E-25 |
| LOC114267806 | 40.16555 | 39.62028 | 40.93541 | 214.8043 | 217.5173 | 215.8935 | -2.53032 | 7.730623 | 6860.591 | 4.34E-86 | 8.12E-83 |
| LOC114267990 | 50.36947 | 50.86778 | 50.92852 | 119.6194 | 120.7635 | 114.8185 | -1.32836 | 5.722783 | 1198.819 | 1.83E-53 | 2.55E-51 |
| LOC114268002 | 5.235055 | 5.159825 | 5.066101 | 2.243703 | 2.132123 | 1.618401 | 1.27528  | 2.928585 | 166.0845 | 4.55E-22 | 5.79E-21 |
| LOC114268329 | 6.658561 | 6.664467 | 6.591026 | 2.071869 | 2.346811 | 2.610795 | 1.38293  | 2.765015 | 178.081  | 5.82E-23 | 8.02E-22 |



|              |          |          |          |          |          |          |          |          |          |          |          |
|--------------|----------|----------|----------|----------|----------|----------|----------|----------|----------|----------|----------|
| LOC114268545 | 18.96332 | 16.83012 | 18.04744 | 7.846086 | 8.208392 | 8.349005 | 1.03373  | 4.288108 | 287.2157 | 1.29E-29 | 2.96E-28 |
| LOC114268390 | 0        | 0        | 0        | 1.849778 | 2.020242 | 2.120399 | -8.6717  | -0.09319 | 205.4917 | 1.22E-24 | 1.92E-23 |
| LOC114268583 | 0.431248 | 0.31563  | 0.367219 | 0.842728 | 0.663536 | 0.785338 | -1.12527 | 0.712101 | 32.47607 | 1.54E-07 | 5.51E-07 |
| LOC114268699 | 1.006483 | 1.511063 | 2.010663 | 2.439475 | 4.190751 | 4.066093 | -1.38603 | 1.366284 | 41.10037 | 3.57E-06 | 1.09E-05 |
| LOC114269870 | 1.143276 | 1.103422 | 1.585161 | 0.593792 | 0.818181 | 0.336711 | 1.02781  | 0.163595 | 15.35588 | 0.000177 | 0.00043  |
| LOC114269900 | 1.451477 | 1.63436  | 1.594799 | 0.483111 | 0.672989 | 0.590044 | 1.291811 | 0.744449 | 38.84422 | 1.49E-08 | 5.96E-08 |
| LOC114269966 | 4.121519 | 4.333482 | 3.868705 | 2.133536 | 1.679875 | 1.275476 | 1.197771 | 1.713074 | 63.50921 | 4.99E-12 | 2.75E-11 |
| LOC114270009 | 1.049983 | 1.216714 | 1.164861 | 0.537396 | 0.627396 | 0.406309 | 1.022484 | 1.34981  | 37.74717 | 2.21E-08 | 8.67E-08 |
| LOC114270085 | 2.868567 | 2.285378 | 2.631468 | 1.205248 | 0.774671 | 1.153012 | 1.222486 | 2.041635 | 80.1265  | 5.39E-14 | 3.54E-13 |
| LOC114269658 | 3.149545 | 3.186951 | 3.554065 | 0.077369 | 0.060918 | 0.058496 | 5.49796  | 1.313236 | 368.8114 | 2E-33    | 6.05E-32 |
| LOC114269481 | 2.204889 | 1.576318 | 1.615069 | 0.827067 | 0.75139  | 0.865828 | 1.041995 | 0.285589 | 18.41281 | 4.51E-05 | 0.000119 |
| LOC114270274 | 0.547665 | 0.482611 | 0.627905 | 0.108213 | 0.136325 | 0.196359 | 1.759832 | -0.01561 | 36.58072 | 3.37E-08 | 1.3E-07  |
| LOC114270656 | 1.169692 | 1.442506 | 1.407588 | 0.50626  | 0.438473 | 0.688982 | 1.169082 | 0.155519 | 20.62067 | 1.75E-05 | 4.89E-05 |
| LOC114270694 | 1.50472  | 1.254231 | 1.460056 | 0.6039   | 0.615341 | 0.483449 | 1.211737 | 0.691459 | 33.31322 | 1.12E-07 | 4.09E-07 |
| LOC114271485 | 0.305665 | 0.172089 | 0.195911 | 7.547506 | 8.822835 | 8.822228 | -5.29425 | 2.384788 | 922.481  | 8.72E-49 | 8.27E-47 |
| LOC114271553 | 0.122276 | 0.094657 | 0.125953 | 0.388984 | 0.382841 | 0.367624 | -1.81961 | 0.024532 | 48.5444  | 5.36E-10 | 2.46E-09 |
| LOC114272077 | 1.883343 | 2.38107  | 2.541255 | 0.060063 | 0.283749 | 0.045412 | 3.922846 | 0.275936 | 121.6596 | 3.26E-18 | 3.03E-17 |
| LOC114272084 | 7.466366 | 5.928092 | 7.509457 | 0.034801 | 0.137007 | 0.052624 | 6.33488  | 2.474952 | 808.7899 | 4.01E-45 | 2.84E-43 |
| LOC114271897 | 0.831122 | 0.76787  | 0.889773 | 0.348653 | 0.30502  | 0.380764 | 1.153234 | -0.11453 | 16.69855 | 9.56E-05 | 0.000241 |
| LOC114272548 | 7.864295 | 10.08263 | 9.154146 | 0.42463  | 0.222893 | 0.107017 | 5.07705  | 0.933401 | 253.3632 | 8.71E-28 | 1.73E-26 |
| LOC114272437 | 0        | 0.029921 | 0        | 1.642353 | 1.977734 | 2.045208 | -7.219   | 0.136887 | 229.9398 | 2.07E-26 | 3.74E-25 |
| LOC114272861 | 13.14981 | 9.723172 | 13.34593 | 5.406083 | 5.436099 | 4.776813 | 1.11468  | 2.866087 | 112.3424 | 7.34E-16 | 5.6E-15  |
| LOC114272629 | 3.186218 | 3.587675 | 3.500831 | 16.02036 | 15.13667 | 17.60972 | -2.35583 | 3.158869 | 668.4223 | 3.49E-43 | 2.21E-41 |
| LOC114272873 | 5.914703 | 5.990008 | 5.902694 | 2.449392 | 2.629866 | 2.068368 | 1.214817 | 2.846071 | 147.2725 | 1.41E-20 | 1.58E-19 |
| LOC114272900 | 1.812718 | 2.014608 | 2.017575 | 6.034062 | 5.829263 | 5.144577 | -1.64182 | 2.311288 | 188.2462 | 1.09E-23 | 1.6E-22  |
| LOC114273286 | 2.905562 | 1.741365 | 2.986497 | 1.192663 | 1.073214 | 0.708507 | 1.282478 | 0.299302 | 25.50638 | 2.4E-06  | 7.51E-06 |

|              |          |          |          |          |          |          |          |          |          |          |          |
|--------------|----------|----------|----------|----------|----------|----------|----------|----------|----------|----------|----------|
| LOC114273432 | 8.745639 | 9.360066 | 10.46546 | 3.462933 | 2.850533 | 2.975249 | 1.521395 | 1.192382 | 71.04771 | 5.65E-13 | 3.38E-12 |
| LOC114273620 | 1.418288 | 1.50441  | 1.603502 | 3.960705 | 3.942288 | 3.587833 | -1.44668 | 1.995364 | 124.4659 | 1.34E-18 | 1.28E-17 |
| LOC114273651 | 3.74508  | 3.308685 | 4.241487 | 7.122096 | 8.658948 | 7.998014 | -1.18598 | 1.644923 | 68.04203 | 1.33E-12 | 7.69E-12 |
| LOC114273877 | 1.489155 | 1.23293  | 1.491826 | 0        | 0        | 0        | 7.641525 | -0.74399 | 81.20868 | 4.21E-14 | 2.79E-13 |
| LOC114274357 | 0.310876 | 0.45868  | 0.49469  | 0        | 0.04603  | 0.029467 | 3.764048 | -0.43476 | 67.06747 | 1.76E-12 | 1.01E-11 |
| LOC114274418 | 0.619889 | 0.697994 | 0.681098 | 0.271278 | 0.147874 | 0.23666  | 1.515285 | 0.33019  | 37.02465 | 2.87E-08 | 1.11E-07 |
| LOC114274460 | 1.519075 | 1.501029 | 1.515789 | 0.140888 | 0.221861 | 0.213042 | 2.827509 | 0.821229 | 140.7586 | 4.94E-20 | 5.3E-19  |
| LOC114274480 | 6.316548 | 6.450441 | 6.835099 | 2.460505 | 2.837487 | 2.931403 | 1.134215 | 3.352324 | 203.7871 | 9.51E-25 | 1.51E-23 |
| LOC114274562 | 1.684062 | 1.643417 | 1.751664 | 0.653083 | 0.674908 | 0.586359 | 1.301332 | 0.729814 | 39.44663 | 1.2E-08  | 4.84E-08 |
| LOC114275510 | 0.533765 | 0.532721 | 0.519826 | 0.330781 | 0.069452 | 0.266766 | 1.185342 | 0.030655 | 17.49802 | 7.32E-05 | 0.000188 |
| LOC114275786 | 5.618675 | 5.49813  | 5.567149 | 0.334379 | 0.047869 | 0.183864 | 4.841495 | 2.38146  | 639.6943 | 1.1E-39  | 5.44E-38 |
| LOC114276421 | 5.301061 | 5.87113  | 5.991593 | 12.08497 | 10.2616  | 12.66053 | -1.13425 | 3.612087 | 244.4458 | 7.7E-27  | 1.44E-25 |
| LOC114276785 | 1.69611  | 1.934619 | 1.815182 | 0.64067  | 0.472915 | 0.454117 | 1.707639 | 0.761637 | 63.05954 | 5.7E-12  | 3.13E-11 |
| LOC114276789 | 4.240707 | 5.463733 | 5.913907 | 0.963606 | 1.342335 | 1.905447 | 1.736553 | 1.34245  | 89.75698 | 1.11E-14 | 7.66E-14 |
| LOC114276593 | 1.25655  | 0.987741 | 1.250376 | 0.086196 | 0        | 0.06517  | 4.400944 | -0.1695  | 97.79938 | 5.36E-16 | 4.15E-15 |
| LOC114276796 | 0.99728  | 0.858715 | 0.859414 | 0.142186 | 0.111953 | 0.120941 | 2.754712 | 0.762803 | 129.7863 | 4.43E-19 | 4.41E-18 |
| LOC114276743 | 3.679303 | 3.065736 | 3.638343 | 0        | 0        | 0        | 9.188682 | 0.622714 | 248.3434 | 3.1E-27  | 5.92E-26 |
| LOC114277182 | 0.388345 | 0.567277 | 0.47282  | 0.820419 | 1.066603 | 1.13961  | -1.21405 | 1.134858 | 48.5764  | 5.3E-10  | 2.44E-09 |
| LOC114277200 | 0.916983 | 0.921327 | 0.852524 | 0.307738 | 0.383645 | 0.407174 | 1.164283 | 0.531441 | 27.78864 | 9.36E-07 | 3.07E-06 |
| LOC114277326 | 2.636391 | 3.228972 | 3.099991 | 1.34526  | 1.125413 | 1.239603 | 1.16918  | 1.502676 | 54.87932 | 6.96E-11 | 3.46E-10 |
| LOC114277378 | 1.164669 | 1.103253 | 1.503104 | 0.386466 | 0.72765  | 0.495461 | 1.092929 | 1.589181 | 45.03653 | 5.5E-09  | 2.29E-08 |
| LOC114277756 | 1.642916 | 1.89504  | 2.641669 | 0.801264 | 1.089716 | 0.826106 | 1.057272 | 0.271796 | 18.06431 | 5.24E-05 | 0.000138 |
| LOC114278790 | 4.77845  | 4.392264 | 3.893066 | 1.89091  | 1.861049 | 1.474337 | 1.227857 | 1.540437 | 61.13282 | 1.02E-11 | 5.44E-11 |
| LOC114278899 | 0.541461 | 0.556668 | 0.482838 | 1.968559 | 1.988015 | 2.049202 | -2.02963 | 2.307617 | 278.2721 | 3.77E-29 | 8.4E-28  |
| LOC114279198 | 0        | 0.014644 | 0        | 0.260056 | 0.223374 | 0.169809 | -5.34413 | -0.8881  | 88.79707 | 4.94E-15 | 3.55E-14 |
| LOC114279317 | 8.012622 | 8.294598 | 8.117484 | 2.231813 | 2.373835 | 2.960362 | 1.569689 | 2.901525 | 242.6138 | 3.62E-27 | 6.88E-26 |

|              |          |          |          |          |          |          |          |          |          |          |          |
|--------------|----------|----------|----------|----------|----------|----------|----------|----------|----------|----------|----------|
| LOC114279884 | 0.650183 | 0.337895 | 0.522049 | 2.227459 | 1.825411 | 1.855962 | -2.03643 | 0.610198 | 86.39515 | 9.12E-15 | 6.37E-14 |
| LOC114279622 | 2.542067 | 2.508587 | 2.667543 | 0.467295 | 0.694983 | 0.549589 | 2.040499 | 0.81749  | 88.29184 | 5.62E-15 | 4.01E-14 |
| LOC114279943 | 0.710559 | 0.947042 | 0.892252 | 0.316327 | 0.383976 | 0.378678 | 1.113673 | 1.378567 | 45.09464 | 1.7E-09  | 7.42E-09 |
| LOC114280494 | 7.378789 | 6.5911   | 6.159799 | 1.273891 | 1.239023 | 1.359741 | 2.267487 | 1.591209 | 179.4683 | 4.61E-23 | 6.41E-22 |
| LOC114280606 | 14.54908 | 14.05068 | 13.29147 | 6.141397 | 6.083409 | 6.515633 | 1.052761 | 2.495877 | 87.71482 | 6.51E-15 | 4.62E-14 |
| LOC114281769 | 1.26023  | 1.923555 | 1.846222 | 0        | 0        | 0        | 8.524854 | 0.031051 | 147.2471 | 3.55E-20 | 3.86E-19 |
| LOC114281959 | 567.7411 | 569.2019 | 557.7558 | 245.6881 | 251.428  | 249.069  | 1.078017 | 8.850784 | 1976.705 | 9.51E-21 | 1.08E-19 |
| LOC114282084 | 1.206719 | 1.242297 | 1.250108 | 0.376046 | 0.468802 | 0.165851 | 1.779363 | 0.557942 | 54.89445 | 6.93E-11 | 3.44E-10 |
| LOC114282920 | 44.02518 | 40.78097 | 44.48473 | 84.68172 | 78.54185 | 83.33336 | -1.03657 | 7.192774 | 1079.343 | 9.78E-28 | 1.94E-26 |
| LOC114283023 | 0.979951 | 0.90016  | 0.906706 | 0.023439 | 0        | 0.017722 | 5.853287 | 0.291053 | 172.139  | 1.59E-22 | 2.11E-21 |
| LOC114283150 | 2.063597 | 2.575563 | 2.349313 | 0.54235  | 0.213514 | 0.273369 | 2.706051 | 0.784951 | 121.2422 | 2.65E-18 | 2.48E-17 |
| LOC114283439 | 0.469242 | 0.57431  | 0.381078 | 1.075519 | 1.168038 | 0.981409 | -1.27972 | 0.258348 | 29.71335 | 4.42E-07 | 1.5E-06  |
| LOC114283520 | 84.28356 | 88.45985 | 89.13702 | 1.537249 | 1.533146 | 1.588432 | 5.701988 | 5.526206 | 8747.96  | 9.74E-91 | 4.42E-87 |
| LOC114283669 | 0.026317 | 0.029633 | 0.014458 | 3.27707  | 3.785629 | 4.195802 | -7.31011 | 2.145314 | 920.6851 | 9.43E-49 | 8.88E-47 |
| LOC114283556 | 2.436587 | 2.118469 | 2.202743 | 0.897069 | 1.236064 | 0.763028 | 1.112976 | 0.736199 | 28.95426 | 5.93E-07 | 1.99E-06 |
| LOC114283698 | 1.144701 | 1.323767 | 1.189746 | 0.281198 | 0.309968 | 0.212605 | 2.067667 | -0.27411 | 38.79288 | 1.52E-08 | 6.06E-08 |
| LOC114284296 | 1.47217  | 1.010137 | 0.935137 | 0.418147 | 0.395082 | 0.442608 | 1.342213 | 0.162652 | 25.89014 | 1.99E-06 | 6.29E-06 |
| LOC114284203 | 1.416532 | 1.044007 | 0.877245 | 2.294092 | 2.617279 | 1.946881 | -1.1279  | 1.033206 | 38.71216 | 1.61E-08 | 6.41E-08 |
| LOC114284473 | 1.976842 | 1.92512  | 1.995928 | 0        | 0        | 0        | 7.835809 | -0.5772  | 94.11654 | 1.63E-15 | 1.21E-14 |
| LOC114284513 | 2.370797 | 3.46787  | 2.556203 | 1.047213 | 1.205098 | 0.730861 | 1.387628 | 1.414403 | 61.03884 | 5.61E-11 | 2.81E-10 |
| LOC114284662 | 1.589865 | 1.290598 | 1.787475 | 4.570376 | 4.074841 | 5.234101 | -1.67452 | 1.364506 | 105.7178 | 8.29E-17 | 6.83E-16 |
| LOC114284838 | 70.84193 | 63.75648 | 65.90762 | 18.57016 | 16.42166 | 18.13249 | 1.813147 | 5.607673 | 1815.26  | 2.49E-59 | 5.51E-57 |
| LOC114284956 | 1.067506 | 1.104788 | 1.026299 | 0.271104 | 0.258397 | 0.194186 | 2.049154 | 1.379242 | 132.3247 | 2.64E-19 | 2.68E-18 |
| LOC114285303 | 11.20475 | 11.98197 | 12.74821 | 21.45294 | 22.63247 | 24.01094 | -1.03327 | 3.997407 | 262.9901 | 2.52E-28 | 5.26E-27 |
| LOC114285773 | 4.176703 | 3.373326 | 3.988448 | 1.272042 | 1.62754  | 1.412574 | 1.3045   | 1.893881 | 85.98476 | 1.01E-14 | 7.05E-14 |
| LOC114285839 | 1.840213 | 1.295047 | 1.642809 | 0.627221 | 0.246926 | 0.671816 | 1.538338 | 0.2664   | 34.33147 | 7.98E-08 | 2.95E-07 |

|              |          |          |          |          |          |          |          |          |          |          |          |
|--------------|----------|----------|----------|----------|----------|----------|----------|----------|----------|----------|----------|
| LOC114285847 | 1.109208 | 1.092845 | 1.574197 | 2.436414 | 2.05065  | 3.430115 | -1.18514 | 0.407112 | 27.52672 | 1.04E-06 | 3.39E-06 |
| LOC114285623 | 31.75876 | 31.11096 | 27.99297 | 13.73425 | 13.83172 | 11.83299 | 1.105719 | 3.889996 | 258.233  | 2.55E-27 | 4.9E-26  |
| LOC114286258 | 5.398422 | 5.424677 | 5.206352 | 1.679549 | 1.246854 | 1.034026 | 1.940436 | 2.926407 | 330.93   | 5.2E-31  | 1.33E-29 |
| LOC114286105 | 6.223603 | 6.255517 | 5.795027 | 2.748453 | 3.01959  | 2.657935 | 1.009132 | 1.958652 | 57.50668 | 3.07E-11 | 1.57E-10 |
| LOC114286517 | 5.304736 | 4.95332  | 4.392725 | 1.175983 | 1.296302 | 1.120298 | 1.921969 | 2.826575 | 314.1612 | 5.85E-31 | 1.5E-29  |
| LOC114287197 | 0.368681 | 0.258305 | 0.369077 | 0.744662 | 0.773944 | 0.799483 | -1.31844 | 1.062043 | 56.04894 | 4.82E-11 | 2.43E-10 |
| LOC114287431 | 8.90702  | 8.968673 | 8.924066 | 0.435575 | 0.544001 | 0.48831  | 4.070298 | 4.074639 | 2217.92  | 9.51E-65 | 3.25E-62 |
| LOC114287545 | 2.173371 | 2.116506 | 2.151327 | 1.067784 | 0.924811 | 0.968783 | 1.022039 | 1.319271 | 38.89859 | 1.46E-08 | 5.85E-08 |
| LOC114288459 | 6.669078 | 7.180586 | 7.096602 | 14.24634 | 12.83864 | 13.50016 | -1.05815 | 4.743992 | 399.825  | 1.07E-34 | 3.62E-33 |
| LOC114289355 | 2.722848 | 2.914784 | 2.991707 | 0.487994 | 0.617512 | 0.553436 | 2.257439 | 2.440797 | 309.5869 | 9.74E-31 | 2.45E-29 |
| LOC114289539 | 10.8697  | 10.92976 | 11.43694 | 4.311855 | 4.317925 | 4.494456 | 1.233038 | 4.325751 | 417.9455 | 2.11E-35 | 7.49E-34 |
| LOC114289568 | 0.150406 | 0.11045  | 0.114962 | 0.665696 | 0.645824 | 0.458374 | -2.30677 | 0.750241 | 115.2902 | 9.61E-18 | 8.58E-17 |
| LOC114289913 | 0.060027 | 0        | 0.032977 | 1.855008 | 1.116907 | 1.196263 | -5.30478 | -0.46205 | 122.4034 | 2.07E-18 | 1.95E-17 |
| LOC114290434 | 0.988467 | 0.813994 | 1.00502  | 3.566894 | 3.568635 | 3.832324 | -2.06946 | 3.257982 | 593.518  | 3.63E-41 | 1.99E-39 |
| LOC114290501 | 39.27603 | 40.50855 | 38.60455 | 8.645125 | 7.129621 | 8.170397 | 2.205782 | 5.097284 | 1923.249 | 1.3E-60  | 3.14E-58 |
| LOC114290523 | 0.861459 | 0.811634 | 0.830621 | 2.396906 | 2.289856 | 2.730424 | -1.6717  | 1.533587 | 121.5705 | 2.47E-18 | 2.31E-17 |
| LOC114290512 | 3.68862  | 4.0435   | 4.052841 | 0.922416 | 0.642478 | 0.751058 | 2.255729 | 1.8877   | 214.466  | 1.92E-25 | 3.23E-24 |
| LOC114291056 | 1.409304 | 2.192771 | 2.055231 | 0.512373 | 0.623475 | 0.493041 | 1.668886 | 0.610416 | 51.25408 | 2.21E-10 | 1.05E-09 |
| LOC114291226 | 8.161153 | 8.335294 | 8.535894 | 2.900534 | 2.470979 | 2.264908 | 1.620207 | 2.655572 | 213.1432 | 2.33E-25 | 3.9E-24  |
| LOC114291116 | 9.549693 | 9.972928 | 10.60138 | 20.86754 | 20.1839  | 22.64589 | -1.18929 | 3.273074 | 224.6464 | 4.38E-26 | 7.71E-25 |
| LOC114291943 | 8.137902 | 8.063668 | 8.123948 | 3.761713 | 3.727267 | 3.323463 | 1.068646 | 2.929042 | 127.3898 | 7.26E-19 | 7.12E-18 |
| LOC114292016 | 112.5579 | 113.6097 | 108.6162 | 37.17549 | 38.70038 | 38.17063 | 1.447971 | 7.119351 | 2036.602 | 1.74E-52 | 2.23E-50 |
| LOC114292275 | 1.054469 | 0.924747 | 1.002625 | 0.239605 | 0.217681 | 0.34838  | 1.762381 | 0.9823   | 77.75246 | 8.88E-14 | 5.7E-13  |
| LOC114291908 | 0.500463 | 0.555583 | 0.658306 | 5.38163  | 5.014155 | 4.737347 | -3.24504 | 3.620982 | 1454.218 | 5.76E-57 | 1.06E-54 |
| LOC114292361 | 1.481975 | 1.466434 | 1.54607  | 0.544235 | 0.621343 | 0.740664 | 1.111489 | 1.162263 | 40.21617 | 9.17E-09 | 3.74E-08 |
| LOC114292460 | 1.195053 | 1.158261 | 0.947394 | 2.859859 | 2.879651 | 2.910725 | -1.49166 | 2.016136 | 132.4476 | 2.58E-19 | 2.62E-18 |

|              |          |          |          |          |          |          |          |          |          |          |          |
|--------------|----------|----------|----------|----------|----------|----------|----------|----------|----------|----------|----------|
| LOC114292694 | 30.54304 | 30.7199  | 27.25904 | 10.16516 | 9.987718 | 11.17113 | 1.391874 | 5.237525 | 869.2258 | 5.09E-39 | 2.4E-37  |
| LOC114292724 | 11.31618 | 11.33083 | 11.80581 | 4.757417 | 5.407713 | 4.711483 | 1.102179 | 3.743271 | 252.4142 | 9.86E-28 | 1.95E-26 |
| LOC114292390 | 1.562814 | 1.605963 | 1.750472 | 4.109677 | 4.017631 | 3.628545 | -1.35846 | 2.489076 | 149.2948 | 9.62E-21 | 1.09E-19 |
| LOC114293011 | 2.925581 | 3.360082 | 3.343037 | 9.040914 | 7.955984 | 9.328531 | -1.55613 | 1.654303 | 114.8089 | 1.07E-17 | 9.48E-17 |
| LOC114293554 | 0.847169 | 0.857312 | 0.88369  | 1.208609 | 1.765099 | 2.033926 | -1.08284 | 1.864136 | 60.19202 | 2.59E-11 | 1.34E-10 |
| LOC114294191 | 20.20821 | 18.12298 | 19.61646 | 7.693746 | 7.934861 | 7.414637 | 1.226079 | 3.763215 | 314.9941 | 5.33E-31 | 1.37E-29 |
| LOC114293731 | 1.723555 | 1.681957 | 1.925304 | 0.522186 | 0.657843 | 0.631694 | 1.429189 | 0.430528 | 37.00996 | 2.88E-08 | 1.12E-07 |
| LOC114293751 | 2.752173 | 2.751101 | 2.406799 | 6.73868  | 6.551872 | 7.410781 | -1.49338 | 2.381434 | 167.6351 | 3.47E-22 | 4.46E-21 |
| LOC114293523 | 8.74462  | 7.76182  | 8.223131 | 23.91584 | 20.86017 | 23.22514 | -1.55785 | 3.587655 | 459.7187 | 6.16E-37 | 2.48E-35 |
| LOC114294301 | 2.286917 | 1.312777 | 2.709808 | 7.499273 | 6.09722  | 6.224645 | -1.73466 | 1.575103 | 117.2203 | 4.61E-17 | 3.86E-16 |
| LOC114294614 | 3.127961 | 2.554178 | 3.043292 | 8.767841 | 8.612291 | 6.727551 | -1.55857 | 2.81264  | 225.6591 | 6.77E-25 | 1.09E-23 |
| LOC114294642 | 0.778895 | 0.739997 | 0.54825  | 0.221233 | 0.348383 | 0.234175 | 1.240138 | 0.35998  | 26.07171 | 1.85E-06 | 5.87E-06 |
| LOC114295211 | 1.888965 | 1.721833 | 1.877819 | 0.218019 | 0.386237 | 0.576932 | 2.044894 | 0.294479 | 58.29028 | 2.41E-11 | 1.25E-10 |
| LOC114295221 | 9.563112 | 9.022945 | 10.17843 | 18.02433 | 17.84682 | 17.74257 | -1.00341 | 4.571922 | 332.6488 | 7.89E-32 | 2.14E-30 |
| LOC114295240 | 1.161367 | 0.94833  | 1.227339 | 0.354546 | 0.456803 | 0.657968 | 1.045316 | 1.490584 | 41.64784 | 6.75E-09 | 2.79E-08 |
| LOC114295603 | 1.817645 | 1.849395 | 1.732444 | 0.079618 | 0.062689 | 0.060197 | 4.586036 | 0.489542 | 177.8851 | 6.01E-23 | 8.28E-22 |
| LOC114296128 | 4.190342 | 4.2673   | 3.673127 | 1.540262 | 1.6758   | 1.524495 | 1.247626 | 2.473086 | 115.1883 | 9.83E-18 | 8.76E-17 |
| LOC114296144 | 3.192107 | 3.162989 | 4.091851 | 1.237905 | 1.218356 | 1.491658 | 1.285986 | 1.796075 | 77.17686 | 1.04E-13 | 6.62E-13 |
| LOC114296259 | 12.75119 | 12.41995 | 12.82412 | 4.12394  | 5.038529 | 4.730738 | 1.336219 | 4.047268 | 407.271  | 5.46E-35 | 1.89E-33 |
| LOC114296272 | 7.156143 | 6.779319 | 6.648048 | 2.824412 | 2.437679 | 2.648782 | 1.28108  | 3.25801  | 236.5991 | 8.22E-27 | 1.53E-25 |
| LOC114296670 | 3.073104 | 2.91563  | 2.845054 | 0.827608 | 0.814538 | 0.782162 | 1.758932 | 1.059348 | 83.93571 | 1.72E-14 | 1.18E-13 |
| LOC114296467 | 1.412507 | 1.004514 | 1.279703 | 0.465487 | 0.461092 | 0.590352 | 1.172324 | 1.700522 | 60.64542 | 1.18E-11 | 6.27E-11 |
| LOC114297666 | 10.60552 | 10.25318 | 10.39618 | 0.607983 | 0.756663 | 0.7859   | 3.73587  | 3.933369 | 1886.611 | 9.53E-62 | 2.46E-59 |
| LOC114297137 | 2.86134  | 2.248592 | 2.423403 | 4.442867 | 5.289907 | 4.629028 | -1.03515 | 1.913033 | 61.44961 | 9.23E-12 | 4.96E-11 |
| LOC114297811 | 0.317195 | 0.219791 | 0.187662 | 0.931436 | 0.873073 | 0.871904 | -1.95403 | -0.42685 | 38.73594 | 1.55E-08 | 6.18E-08 |
| LOC114297542 | 0.120872 | 0.122492 | 0.199211 | 3.603481 | 3.425472 | 3.820921 | -4.71011 | 2.260638 | 792.2646 | 4.07E-46 | 3.15E-44 |

|              |          |          |          |          |          |          |          |          |          |          |          |
|--------------|----------|----------|----------|----------|----------|----------|----------|----------|----------|----------|----------|
| LOC114297950 | 6.50029  | 5.20194  | 5.815743 | 2.194468 | 1.827534 | 2.361128 | 1.353906 | 2.38447  | 123.8747 | 1.51E-18 | 1.44E-17 |
| LOC114298047 | 17.26768 | 16.64338 | 17.81874 | 2.330352 | 3.072805 | 2.674704 | 2.560402 | 4.25791  | 1300.374 | 8.13E-55 | 1.23E-52 |
| LOC114298100 | 6.583787 | 6.31355  | 6.55819  | 2.202929 | 2.666489 | 3.032825 | 1.176419 | 2.929996 | 147.3714 | 1.38E-20 | 1.55E-19 |
| LOC114298139 | 29.14345 | 27.68117 | 28.7424  | 9.835073 | 10.55792 | 10.65571 | 1.354102 | 5.373571 | 1011.076 | 2.06E-50 | 2.22E-48 |
| LOC114297901 | 3.481681 | 3.57343  | 2.809857 | 0.952162 | 1.1025   | 1.355107 | 1.40498  | 1.17561  | 59.70244 | 1.57E-11 | 8.25E-11 |
| LOC114298289 | 20.71872 | 19.61977 | 20.48293 | 2.724674 | 2.257052 | 2.274631 | 2.972886 | 4.424868 | 1839.704 | 2.78E-61 | 6.8E-59  |
| LOC114298694 | 2.993502 | 3.3893   | 2.907479 | 0.450966 | 0.331404 | 0.409154 | 2.861601 | 1.7079   | 264.3113 | 2.13E-28 | 4.46E-27 |
| LOC114298767 | 7.151841 | 6.974737 | 7.167572 | 15.12223 | 16.2754  | 14.97043 | -1.22892 | 3.527673 | 289.9479 | 9.31E-30 | 2.17E-28 |
| LOC114298702 | 0.307136 | 0.288196 | 0.337464 | 1.985134 | 2.051474 | 2.392059 | -2.88743 | 1.145005 | 223.4818 | 5.17E-26 | 9.06E-25 |
| LOC114299003 | 0.409457 | 0.367398 | 0.400681 | 0.16282  | 0.15567  | 0.175862 | 1.141382 | 0.49197  | 26.17316 | 1.78E-06 | 5.65E-06 |
| LOC114299189 | 0.934372 | 0.762773 | 1.385955 | 0.042463 | 0.033434 | 0.032105 | 4.618859 | -0.31978 | 88.27513 | 5.64E-15 | 4.03E-14 |
| LOC114299307 | 1.093955 | 0.851056 | 1.28939  | 0.253096 | 0.341622 | 0.246032 | 1.821444 | 0.179308 | 44.22155 | 2.29E-09 | 9.86E-09 |
| LOC114299602 | 0.449334 | 0.474328 | 0.586272 | 1.097588 | 0.944595 | 1.157935 | -1.18832 | 0.79693  | 38.39674 | 1.75E-08 | 6.94E-08 |
| LOC114299631 | 12.1513  | 11.81803 | 11.95908 | 0.15703  | 0.226674 | 0.237451 | 5.705651 | 3.647751 | 2189.002 | 1.67E-64 | 5.59E-62 |
| LOC114299725 | 1.486342 | 1.863084 | 1.679326 | 0.02549  | 0.100349 | 0        | 5.121395 | 0.971232 | 244.4579 | 6.33E-26 | 1.1E-24  |
| LOC114299766 | 1.533228 | 1.369555 | 1.355226 | 0.155706 | 0.134857 | 0.082407 | 3.429867 | 1.490657 | 280.9462 | 2.73E-29 | 6.15E-28 |
| LOC114299847 | 1.377614 | 1.64916  | 1.975701 | 0.606294 | 0.809462 | 0.837079 | 1.01639  | 1.377894 | 37.18081 | 2.79E-08 | 1.08E-07 |
| LOC114299868 | 1.394076 | 1.660288 | 1.384448 | 0.243671 | 0.306974 | 0.331618 | 2.186229 | 0.143028 | 58.3561  | 2.36E-11 | 1.22E-10 |
| LOC114300556 | 2.76156  | 2.377861 | 2.320302 | 4.724727 | 5.347631 | 4.242015 | -1.03638 | 0.488278 | 23.77084 | 4.7E-06  | 1.42E-05 |
| LOC114300860 | 0.409422 | 0.599311 | 0.719759 | 1.860642 | 2.461212 | 2.419653 | -2.08765 | 0.116719 | 63.88047 | 4.47E-12 | 2.47E-11 |
| LOC114300919 | 0.72061  | 0.55446  | 0.699391 | 1.331772 | 1.065782 | 1.337048 | -1.01288 | 1.290092 | 39.39859 | 1.22E-08 | 4.92E-08 |
| LOC114301147 | 4.010572 | 4.210767 | 3.39426  | 8.604108 | 8.58459  | 8.119218 | -1.22601 | 3.382015 | 249.3839 | 1.47E-27 | 2.87E-26 |
| LOC114301349 | 0.035563 | 0.026696 | 0.052099 | 0.9697   | 0.984079 | 1.12418  | -4.7941  | 0.461227 | 240.2244 | 5.01E-27 | 9.42E-26 |
| LOC114302112 | 8.671507 | 8.543586 | 8.472889 | 17.90255 | 17.33171 | 17.45153 | -1.13969 | 3.688469 | 286.1053 | 1.47E-29 | 3.37E-28 |
| LOC114302239 | 0.651307 | 0.617297 | 0.561168 | 0.11073  | 0.093892 | 0.08372  | 2.571796 | 1.244609 | 167.6597 | 3.46E-22 | 4.44E-21 |
| LOC114301909 | 3.948526 | 3.276023 | 4.281326 | 0.283331 | 0.297447 | 0.428436 | 3.355596 | 0.40664  | 123.7772 | 1.55E-18 | 1.47E-17 |

|              |          |          |          |          |          |          |          |          |          |          |          |
|--------------|----------|----------|----------|----------|----------|----------|----------|----------|----------|----------|----------|
| LOC114302248 | 258.4977 | 249.5597 | 253.5304 | 86.53027 | 86.47608 | 91.50894 | 1.420034 | 7.067397 | 2020.708 | 1.07E-51 | 1.31E-49 |
| LOC114302290 | 6.90132  | 6.28979  | 7.263692 | 19.62543 | 20.6847  | 19.60426 | -1.65615 | 4.588657 | 846.5058 | 2.83E-47 | 2.35E-45 |
| LOC114302555 | 100.9639 | 98.06591 | 104.8551 | 255.1389 | 238.0097 | 252.8865 | -1.40094 | 7.590114 | 2136.588 | 5.39E-42 | 3.14E-40 |
| LOC114302593 | 3.139496 | 2.593445 | 2.982295 | 0.850259 | 0.852047 | 0.730517 | 1.742553 | 2.98121  | 303.1885 | 2.01E-30 | 4.9E-29  |
| LOC114302805 | 30.9548  | 26.40436 | 33.26451 | 57.96921 | 55.61475 | 57.45227 | -1.02146 | 5.553208 | 388.2841 | 1.93E-15 | 1.43E-14 |
| LOC114303526 | 0.171656 | 0.105428 | 0.17146  | 2.297753 | 2.32289  | 2.573721 | -4.08147 | 1.323816 | 381.0782 | 6.14E-34 | 1.94E-32 |
| LOC114302915 | 29.32144 | 29.13602 | 29.13006 | 58.8068  | 57.0771  | 59.90612 | -1.11018 | 5.932055 | 974.0251 | 9.5E-50  | 9.65E-48 |
| LOC114302995 | 7.541429 | 6.241713 | 8.14444  | 2.636341 | 2.675432 | 2.081847 | 1.471356 | 2.210087 | 126.0897 | 9.52E-19 | 9.25E-18 |
| LOC114303003 | 44.5256  | 39.86261 | 44.36878 | 11.5044  | 12.55271 | 11.61222 | 1.743869 | 4.663878 | 897.6207 | 2.64E-48 | 2.38E-46 |
| LOC114302484 | 0.024321 | 0.109541 | 0.106889 | 4.42109  | 3.620258 | 3.342652 | -5.6209  | 1.27939  | 444.8473 | 2.1E-36  | 8.17E-35 |
| LOC114303194 | 0.51756  | 0.356138 | 0.442295 | 1.30671  | 1.440404 | 1.541224 | -1.79928 | 0.03714  | 47.90257 | 6.63E-10 | 3.02E-09 |
| LOC114303410 | 9.613792 | 9.57041  | 8.231644 | 3.31853  | 3.546078 | 3.193324 | 1.341356 | 3.979086 | 373.7376 | 8.23E-32 | 2.23E-30 |
| LOC114304202 | 0.677488 | 0.464343 | 0.517833 | 1.070915 | 1.306964 | 0.890655 | -1.06449 | -0.15682 | 15.24907 | 0.000183 | 0.000443 |
| LOC114304722 | 6.876098 | 5.900011 | 6.524821 | 2.439746 | 3.13145  | 3.158592 | 1.024343 | 2.942398 | 113.2742 | 1.5E-17  | 1.32E-16 |
| LOC114304742 | 1.913884 | 1.971622 | 2.102864 | 6.366011 | 5.886636 | 4.757181 | -1.59756 | 1.531645 | 107.7752 | 5.17E-17 | 4.33E-16 |
| LOC114304954 | 10.46477 | 10.64757 | 10.80542 | 20.69619 | 20.77088 | 21.4182  | -1.08443 | 5.257563 | 674.359  | 2.46E-43 | 1.57E-41 |
| LOC114305119 | 103.9376 | 104.0596 | 101.6414 | 17.74851 | 17.27814 | 17.85019 | 2.444678 | 6.601145 | 4896.867 | 1.16E-79 | 1.47E-76 |
| LOC114305190 | 2.41507  | 1.977719 | 1.869538 | 0.798212 | 1.099849 | 0.905256 | 1.039455 | -0.11392 | 13.67097 | 0.000376 | 0.000869 |
| LOC114305023 | 13.77303 | 11.833   | 14.302   | 1.736665 | 2.222011 | 2.461949 | 2.506632 | 2.553568 | 380.2738 | 6.63E-34 | 2.09E-32 |
| LOC114305259 | 0.218095 | 0.163716 | 0.159754 | 4.228887 | 4.006026 | 3.796833 | -4.51947 | 0.816404 | 295.4169 | 4.91E-30 | 1.16E-28 |
| LOC114305307 | 11.90759 | 11.41432 | 12.8545  | 21.14101 | 22.80712 | 23.47512 | -1.00809 | 3.92467  | 248.0429 | 1.75E-27 | 3.41E-26 |
| LOC114305347 | 8.498164 | 7.835251 | 8.897885 | 4.034692 | 3.291259 | 4.232237 | 1.023468 | 3.208308 | 143.9799 | 2.64E-20 | 2.9E-19  |
| LOC114305431 | 1.874872 | 1.882187 | 2.109639 | 0.123187 | 0.193987 | 0.341507 | 2.97256  | 0.645519 | 127.3579 | 7.31E-19 | 7.16E-18 |
| LOC114305399 | 1.020144 | 1.443213 | 0.804731 | 0.095099 | 0.299513 | 0        | 2.893134 | -0.29831 | 42.73422 | 1.38E-07 | 4.98E-07 |
| LOC114305448 | 3.721845 | 3.382926 | 3.005423 | 6.928676 | 5.968857 | 6.37872  | -1.02616 | 2.740181 | 104.902  | 1E-16    | 8.21E-16 |
| LOC114305402 | 0.85709  | 0.660319 | 1.189542 | 3.77209  | 3.486541 | 2.913962 | -1.99377 | 0.556473 | 80.06105 | 4.78E-14 | 3.15E-13 |

|              |          |          |          |          |          |          |          |          |          |          |          |
|--------------|----------|----------|----------|----------|----------|----------|----------|----------|----------|----------|----------|
| LOC114305464 | 1.646325 | 1.595524 | 1.853884 | 0.312673 | 0.117232 | 0.135087 | 3.134184 | 1.825216 | 290.9854 | 3.04E-28 | 6.31E-27 |
| LOC114305410 | 0        | 0        | 0        | 3.121501 | 1.585655 | 2.436203 | -8.1338  | -0.59627 | 131.7025 | 5.89E-19 | 5.81E-18 |
| LOC114305411 | 1.820565 | 1.484448 | 1.483004 | 0.627657 | 0.71883  | 0.560834 | 1.22287  | 0.2233   | 23.79955 | 4.65E-06 | 1.4E-05  |
| LOC114305382 | 33.44156 | 38.60327 | 33.57152 | 0        | 0.258262 | 0        | 8.348222 | 3.130011 | 1347.463 | 4.68E-43 | 2.93E-41 |
| LOC114305474 | 0.780966 | 0.530938 | 0.85808  | 0.375004 | 0.231994 | 0.303781 | 1.170621 | 0.190935 | 20.57937 | 1.78E-05 | 4.97E-05 |
| LOC114305521 | 1.755349 | 1.957141 | 2.136669 | 0.813369 | 0.911367 | 0.780531 | 1.110266 | 1.335436 | 44.82316 | 1.86E-09 | 8.11E-09 |
| LOC114305566 | 0        | 0        | 0        | 8.673073 | 7.817278 | 6.902577 | -9.68047 | 0.917885 | 420.7571 | 4.2E-35  | 1.46E-33 |
| LOC114305557 | 1.671573 | 1.297183 | 1.538795 | 4.311557 | 5.140659 | 4.594819 | -1.74398 | 2.073661 | 178.9702 | 5.01E-23 | 6.94E-22 |
| LOC114305583 | 0.036002 | 0.040538 | 0        | 4.646581 | 4.998317 | 5.294449 | -7.41594 | 1.089393 | 462.2253 | 5.02E-37 | 2.03E-35 |
| LOC114305601 | 0.883564 | 0.831551 | 0.869381 | 0.287671 | 0.226502 | 0.253749 | 1.651726 | 0.460459 | 48.54311 | 5.36E-10 | 2.46E-09 |
| LOC114305603 | 7.281326 | 7.315814 | 7.434122 | 1.751245 | 1.475071 | 1.662777 | 2.07073  | 2.599539 | 310.8042 | 8.5E-31  | 2.15E-29 |
| LOC114305615 | 2.688363 | 2.509803 | 2.598611 | 5.660218 | 5.187267 | 6.29066  | -1.24144 | 2.902474 | 174.3473 | 1.09E-22 | 1.47E-21 |
| LOC114305617 | 7.639476 | 6.902866 | 6.735774 | 1.285852 | 1.012437 | 0.712942 | 2.746929 | 2.381949 | 374.5542 | 1.15E-33 | 3.55E-32 |
| LOC114305621 | 2.984298 | 2.825042 | 2.422958 | 1.29622  | 0.9639   | 1.397454 | 1.069537 | 2.197009 | 69.81693 | 8.65E-13 | 5.09E-12 |
| LOC114305627 | 0.377689 | 0.436771 | 0.37012  | 0        | 0        | 0        | 7.904576 | -0.51651 | 98.28472 | 5.99E-16 | 4.62E-15 |
| LOC114305642 | 0.587561 | 1.464955 | 1.060592 | 4.806365 | 4.925688 | 5.710488 | -2.43853 | 1.181708 | 160.8998 | 8.31E-21 | 9.51E-20 |
| LOC114305643 | 12.49708 | 11.44885 | 12.22796 | 5.578547 | 5.609521 | 4.980018 | 1.060814 | 2.83628  | 116.421  | 7.5E-18  | 6.76E-17 |
| LOC114305679 | 7.698132 | 6.568162 | 7.256539 | 2.013684 | 1.585507 | 1.426126 | 2.016384 | 3.241937 | 467.3361 | 3.02E-36 | 1.16E-34 |
| LOC114305706 | 1.432762 | 1.69011  | 1.424308 | 3.96877  | 3.385283 | 2.813126 | -1.25076 | 1.72657  | 75.64521 | 1.58E-13 | 9.91E-13 |
| LOC114305689 | 0.781086 | 0.756063 | 0.963607 | 0.249101 | 0.156907 | 0.094169 | 2.261999 | 0.266073 | 64.71695 | 3.5E-12  | 1.95E-11 |
| LOC114305741 | 1.477132 | 0.997948 | 1.13609  | 3.759227 | 3.171309 | 4.161848 | -1.70401 | 0.063942 | 43.88504 | 2.56E-09 | 1.1E-08  |
| LOC114305698 | 8.178431 | 7.678403 | 7.720352 | 0.167515 | 0.197843 | 0.158316 | 5.357864 | 2.401456 | 778.7693 | 8.1E-46  | 6.1E-44  |
| LOC114305726 | 0.481173 | 0.40635  | 0.425885 | 0.996172 | 1.128702 | 1.148133 | -1.42446 | 1.815698 | 108.3322 | 4.56E-17 | 3.82E-16 |
| LOC114305774 | 1.488073 | 1.218595 | 1.337734 | 0.614785 | 0.193624 | 0.46482  | 1.600771 | -0.17524 | 26.79893 | 1.39E-06 | 4.45E-06 |
| LOC114305776 | 0.500197 | 0.669776 | 0.683271 | 0.098299 | 0.116096 | 0.241544 | 1.84748  | -0.05625 | 36.86691 | 3.04E-08 | 1.17E-07 |
| LOC114305860 | 1.909064 | 1.58324  | 1.771001 | 0        | 0        | 0        | 9.894176 | 1.27572  | 408.2737 | 1.25E-34 | 4.17E-33 |



|              |          |          |          |          |          |          |          |          |          |          |          |
|--------------|----------|----------|----------|----------|----------|----------|----------|----------|----------|----------|----------|
| LOC114305937 | 2.115634 | 2.06028  | 1.993275 | 0.491361 | 0.379441 | 0.45009  | 2.12772  | 2.855353 | 391.1764 | 2.38E-34 | 7.78E-33 |
| LOC114305950 | 9.12493  | 9.159572 | 9.054435 | 1.800193 | 1.316168 | 1.263852 | 2.558061 | 2.188494 | 314.6587 | 5.54E-31 | 1.42E-29 |
| LOC114305936 | 9.033633 | 9.171172 | 9.442435 | 1.548887 | 1.599829 | 1.762896 | 2.380084 | 4.136497 | 1162.517 | 6.56E-53 | 8.69E-51 |
| LOC114305975 | 0.550315 | 0.636401 | 0.735391 | 0.229816 | 0.298034 | 0.20442  | 1.274626 | 0.914578 | 41.36468 | 6.13E-09 | 2.54E-08 |
| LOC114305979 | 0.838116 | 1.074385 | 0.93504  | 0.046878 | 0.018455 | 0.053165 | 4.422223 | 0.348478 | 150.0999 | 8.27E-21 | 9.46E-20 |
| LOC114306041 | 1.636208 | 1.522511 | 1.548079 | 0        | 0        | 0.015617 | 7.614433 | 1.137749 | 358.1015 | 5.76E-33 | 1.69E-31 |
| LOC114306065 | 1.41838  | 1.030125 | 1.22337  | 0.206269 | 0.121807 | 0.146207 | 2.877409 | 1.596318 | 235.5622 | 1.26E-26 | 2.32E-25 |
| LOC114306071 | 40.01789 | 39.42484 | 38.80826 | 5.919511 | 6.008201 | 6.073035 | 2.609358 | 6.120374 | 4801.715 | 2.73E-79 | 2.89E-76 |
| LOC114306058 | 0.168344 | 0.200705 | 0.163205 | 1.314079 | 1.077182 | 1.211297 | -2.84887 | 1.092406 | 209.7895 | 3.84E-25 | 6.31E-24 |
| LOC114306098 | 1.292754 | 1.940851 | 1.657137 | 6.210705 | 5.94742  | 6.810918 | -2.07002 | 1.988807 | 223.6527 | 5.04E-26 | 8.85E-25 |
| LOC114306122 | 0.221105 | 0.248964 | 0.294996 | 0.976115 | 1.039817 | 1.063605 | -2.11464 | 0.337601 | 78.84537 | 6.62E-14 | 4.29E-13 |
| LOC114306187 | 15.54936 | 15.58796 | 16.2857  | 6.585775 | 6.453385 | 7.032814 | 1.133147 | 4.667201 | 427.3165 | 9.32E-36 | 3.41E-34 |
| LOC114306205 | 17.42092 | 14.61727 | 14.33735 | 5.624455 | 5.006138 | 5.916494 | 1.383795 | 2.250246 | 119.8451 | 3.57E-18 | 3.31E-17 |
| LOC114306227 | 0.11716  | 0.211075 | 0.18022  | 2.513111 | 2.381195 | 2.608594 | -3.97577 | 0.803217 | 258.1352 | 4.69E-28 | 9.56E-27 |
| LOC114306149 | 0.021221 | 0        | 0        | 1.002965 | 1.36679  | 1.429125 | -6.97601 | -0.10289 | 189.4926 | 8.94E-24 | 1.32E-22 |
| LOC114306240 | 0.541461 | 0.622938 | 0.763057 | 0.171179 | 0.252714 | 0.275025 | 1.314778 | 0.285418 | 27.66756 | 9.82E-07 | 3.21E-06 |
| LOC114306153 | 4.027743 | 4.367259 | 3.933733 | 0        | 0        | 0.205027 | 5.526961 | 0.472905 | 183.7202 | 2.28E-23 | 3.27E-22 |
| LOC114306246 | 3.706724 | 3.559975 | 4.120647 | 0.673816 | 1.185914 | 1.108808 | 1.796433 | 1.761144 | 134.1024 | 1.84E-19 | 1.9E-18  |
| LOC114306243 | 0.021386 | 0        | 0.023498 | 0.855288 | 0.948917 | 0.852412 | -5.67584 | -0.59778 | 121.7938 | 2.35E-18 | 2.21E-17 |
| LOC114306295 | 1.978461 | 2.056378 | 2.341035 | 0.78385  | 0.7987   | 0.871537 | 1.260028 | 0.880664 | 41.26641 | 6.34E-09 | 2.62E-08 |
| LOC114306278 | 11.7308  | 12.09436 | 12.00299 | 2.13245  | 1.311734 | 2.015351 | 2.619858 | 2.506841 | 389.91   | 2.68E-34 | 8.74E-33 |
| LOC114306370 | 0.51521  | 0.424482 | 0.62131  | 1.41626  | 1.115116 | 1.295313 | -1.38493 | 1.139388 | 63.66228 | 4.77E-12 | 2.63E-11 |
| LOC114306382 | 0.293781 | 0.28354  | 0.307418 | 0.635763 | 0.881017 | 0.884453 | -1.56022 | 0.303064 | 44.79474 | 1.88E-09 | 8.19E-09 |
| LOC114306321 | 0.634389 | 0.555583 | 0.968097 | 1.857944 | 2.118657 | 1.986004 | -1.57359 | 0.269943 | 43.63846 | 2.79E-09 | 1.19E-08 |
| LOC114306393 | 0.285571 | 0.282966 | 0.263566 | 0.020765 | 0.073572 | 0.031399 | 2.55012  | -0.06804 | 59.70118 | 1.57E-11 | 8.25E-11 |
| LOC114306356 | 247.5798 | 252.3681 | 250.5616 | 541.8156 | 539.0617 | 558.9917 | -1.23278 | 8.160308 | 2039.207 | 2.88E-29 | 6.48E-28 |

|              |          |          |          |          |          |          |          |          |          |          |          |
|--------------|----------|----------|----------|----------|----------|----------|----------|----------|----------|----------|----------|
| LOC114306401 | 16.62615 | 14.65342 | 15.16157 | 39.93074 | 42.0058  | 43.32742 | -1.537   | 5.289037 | 1230.363 | 2.53E-53 | 3.48E-51 |
| LOC114306409 | 6.110223 | 5.24508  | 5.245187 | 1.109562 | 1.085142 | 0.90072  | 2.327394 | 3.926018 | 908.9211 | 2.89E-44 | 1.96E-42 |
| LOC114306417 | 1.341559 | 1.336294 | 1.332294 | 0.093797 | 0.055389 | 0.053188 | 4.209971 | 0.811092 | 212.0088 | 2.76E-25 | 4.6E-24  |
| LOC114306457 | 15.58305 | 14.87751 | 13.61488 | 6.015264 | 6.516497 | 6.451006 | 1.105988 | 3.748945 | 250.1839 | 1.32E-27 | 2.6E-26  |
| LOC114306468 | 11.93801 | 11.65571 | 11.87338 | 0.201684 | 0.190559 | 0.198233 | 5.793524 | 3.998534 | 2821.648 | 3.01E-69 | 1.35E-66 |
| LOC114306479 | 3.817587 | 3.543953 | 4.418251 | 1.60384  | 1.444946 | 1.597387 | 1.238224 | 3.279122 | 213.0202 | 3.59E-25 | 5.93E-24 |
| LOC114306478 | 0.689948 | 0.796302 | 0.758075 | 0.313551 | 0.197503 | 0.14224  | 1.713004 | -0.08959 | 32.58888 | 1.48E-07 | 5.29E-07 |
| LOC114306506 | 0.238398 | 0.107374 | 0.06985  | 0.404474 | 0.636938 | 0.720839 | -2.1702  | -0.43417 | 42.49613 | 5E-09    | 2.09E-08 |
| LOC114306519 | 5.80498  | 5.446995 | 6.555345 | 2.418262 | 1.327071 | 1.46824  | 1.70473  | 2.527536 | 174.5362 | 2.41E-19 | 2.45E-18 |
| LOC114306525 | 17.09701 | 16.52395 | 16.67187 | 32.82753 | 34.15718 | 34.51288 | -1.11945 | 4.43948  | 389.8697 | 2.69E-34 | 8.77E-33 |
| LOC114306533 | 3.878228 | 4.289586 | 3.62011  | 0.935831 | 0.491228 | 0.471702 | 2.573564 | 1.072124 | 141.7104 | 4.1E-20  | 4.43E-19 |
| LOC114306545 | 35.12646 | 36.04912 | 35.72786 | 7.981705 | 8.40331  | 8.241711 | 2.009835 | 4.696021 | 1219.637 | 8.97E-54 | 1.27E-51 |
| LOC114306546 | 0.720786 | 0.785422 | 0.562034 | 2.028789 | 1.963471 | 2.684335 | -1.80138 | 0.956452 | 89.56496 | 4.07E-15 | 2.94E-14 |
| LOC114306595 | 0.714225 | 0.746772 | 0.653957 | 0.278214 | 0.267736 | 0.280466 | 1.242836 | -0.05349 | 20.02202 | 2.25E-05 | 6.21E-05 |
| LOC114306573 | 3.520126 | 2.494368 | 2.73407  | 6.123142 | 5.820135 | 5.421963 | -1.07991 | 2.137084 | 74.76053 | 2.01E-13 | 1.25E-12 |
| LOC114306637 | 1.41648  | 1.472264 | 1.543043 | 0.176062 | 0.051985 | 0.099836 | 3.694992 | 1.057038 | 217.5423 | 1.22E-25 | 2.09E-24 |
| LOC114306640 | 0.588191 | 0.526445 | 0.596557 | 0.027416 | 0.107932 | 0.26947  | 1.85851  | -0.30056 | 29.56355 | 5.26E-07 | 1.77E-06 |
| LOC114306643 | 10.01813 | 9.143057 | 10.37007 | 19.4572  | 17.20664 | 19.05908 | -1.01783 | 4.039659 | 260.8534 | 3.31E-28 | 6.83E-27 |
| LOC114306667 | 33.62217 | 30.76309 | 29.51533 | 13.63487 | 13.51317 | 13.90505 | 1.088396 | 4.944627 | 478.898  | 1.33E-37 | 5.61E-36 |
| LOC114306654 | 0        | 0        | 0        | 1.984685 | 2.10961  | 2.25084  | -8.02212 | -0.7106  | 127.7337 | 9.23E-19 | 8.98E-18 |
| LOC114306681 | 1.23149  | 1.06139  | 0.952174 | 0.497473 | 0.500497 | 0.501499 | 1.009373 | 0.730491 | 24.52022 | 3.46E-06 | 1.06E-05 |
| LOC114306756 | 2.451252 | 2.545958 | 2.25215  | 0.153653 | 0.211717 | 0.145215 | 3.690168 | 0.968154 | 210.3365 | 3.54E-25 | 5.84E-24 |
| LOC114306759 | 1.143041 | 1.189465 | 1.202337 | 0.482533 | 0.484605 | 0.54352  | 1.11413  | 3.225981 | 179.2275 | 4.8E-23  | 6.67E-22 |
| LOC114306765 | 0.885365 | 1.023154 | 0.853323 | 0.437654 | 0.322362 | 0.405615 | 1.146288 | 1.391165 | 48.7147  | 5.07E-10 | 2.33E-09 |
| LOC114306732 | 1.307379 | 1.077151 | 1.156185 | 0        | 0        | 0.043826 | 5.723127 | -0.55428 | 85.95063 | 1.02E-14 | 7.1E-14  |
| LOC114306821 | 0.383866 | 1.111455 | 0.783287 | 4.784914 | 4.670107 | 5.615017 | -2.85493 | 1.696045 | 250.2033 | 1.23E-20 | 1.38E-19 |

|              |          |          |          |          |          |          |          |          |          |          |          |
|--------------|----------|----------|----------|----------|----------|----------|----------|----------|----------|----------|----------|
| LOC114306825 | 1.719185 | 1.613165 | 1.574117 | 0.347241 | 0.273406 | 0.262539 | 2.363305 | -0.48842 | 39.99335 | 9.92E-09 | 4.03E-08 |
| LOC114306722 | 1.542265 | 1.46942  | 1.629376 | 3.127051 | 4.414862 | 4.076325 | -1.44286 | 0.518757 | 45.31036 | 1.58E-09 | 6.92E-09 |
| LOC114306938 | 0.036271 | 0.027228 | 0.044281 | 0.161174 | 0.184587 | 0.160632 | -2.31795 | -0.31144 | 56.22033 | 4.57E-11 | 2.31E-10 |
| LOC114306940 | 0.754062 | 0.555163 | 0.716988 | 0.079082 | 0.103777 | 0.119583 | 2.592321 | -0.1242  | 59.94614 | 1.45E-11 | 7.69E-11 |
| LOC114306946 | 2.212419 | 2.317376 | 2.298969 | 0.155883 | 0.073642 | 0.235717 | 3.736992 | 1.165079 | 239.2616 | 5.71E-27 | 1.07E-25 |
| LOC114306949 | 0.284844 | 0.168807 | 0.280026 | 0.735814 | 0.879762 | 0.638746 | -1.7048  | 0.066104 | 43.09005 | 3.37E-09 | 1.43E-08 |
| LOC114306993 | 3.76304  | 2.791937 | 3.301277 | 1.378712 | 1.503072 | 1.603696 | 1.024695 | 1.353924 | 38.77809 | 1.53E-08 | 6.09E-08 |
| LOC114306961 | 207.5419 | 212.8786 | 209.9456 | 62.98483 | 60.58881 | 61.02609 | 1.66679  | 7.331704 | 2849.556 | 1.05E-62 | 2.9E-60  |
| LOC114307001 | 7.508211 | 7.320954 | 6.45812  | 18.55183 | 17.92033 | 18.25932 | -1.46532 | 4.269296 | 569.194  | 1.83E-40 | 9.54E-39 |
| LOC114306962 | 3.218632 | 3.338804 | 3.369369 | 0.829261 | 1.233317 | 1.184294 | 1.477444 | 1.433723 | 80.07563 | 4.76E-14 | 3.14E-13 |
| LOC114307015 | 4.668569 | 3.859887 | 5.237164 | 1.661717 | 1.261652 | 1.525597 | 1.533598 | 1.528135 | 88.55425 | 5.26E-15 | 3.77E-14 |
| LOC114307028 | 1.921161 | 1.737392 | 2.027755 | 4.317287 | 4.979847 | 4.740324 | -1.41342 | 2.736778 | 195.6217 | 3.37E-24 | 5.12E-23 |
| LOC114307036 | 1.289462 | 1.330937 | 1.416785 | 4.604307 | 4.262447 | 3.903138 | -1.75988 | 2.484715 | 237.1142 | 7.66E-27 | 1.43E-25 |
| LOC114307046 | 2.004818 | 1.585364 | 1.950551 | 0.08346  | 0.021904 | 0.021034 | 5.39172  | 0.980933 | 273.5767 | 6.7E-29  | 1.46E-27 |
| LOC114307059 | 31.89687 | 31.05319 | 31.94905 | 13.30181 | 12.39639 | 12.5961  | 1.205351 | 5.783214 | 1010.749 | 2.09E-50 | 2.24E-48 |
| LOC114307110 | 22.02144 | 27.83284 | 23.40257 | 2.509179 | 2.461955 | 2.480841 | 3.190217 | 4.22872  | 1107.518 | 1.07E-21 | 1.32E-20 |
| LOC114307093 | 247.926  | 254.7533 | 244.4626 | 37.68729 | 37.05448 | 40.01727 | 2.597682 | 7.910325 | 7058.742 | 1.24E-86 | 2.82E-83 |
| LOC114307103 | 1.491965 | 1.254047 | 1.062071 | 0.420189 | 0.360919 | 0.346573 | 1.662126 | 0.357058 | 44.05604 | 2.42E-09 | 1.04E-08 |
| LOC114307116 | 0.723204 | 0.678605 | 0.92705  | 0        | 0.028753 | 0        | 5.778205 | -0.50452 | 88.6312  | 5.16E-15 | 3.69E-14 |
| LOC114307146 | 0.226021 | 0.081803 | 0.150777 | 0.366845 | 0.392824 | 0.399399 | -1.41649 | 0.082419 | 30.07601 | 3.92E-07 | 1.34E-06 |
| LOC114307158 | 0.891875 | 0.897129 | 1.006072 | 0.324254 | 0.357429 | 0.408598 | 1.233794 | 0.795286 | 37.43974 | 2.47E-08 | 9.64E-08 |
| LOC114307171 | 0.647792 | 0.35213  | 0.490866 | 1.055752 | 1.087037 | 0.798222 | -1.05423 | 0.070985 | 17.41627 | 6.97E-05 | 0.00018  |
| LOC114307220 | 11.61773 | 10.35622 | 10.2385  | 1.466594 | 1.385697 | 1.552387 | 2.760757 | 2.205938 | 356.8378 | 6.54E-33 | 1.9E-31  |
| LOC114307242 | 0.798056 | 0.681703 | 0.93733  | 0.150075 | 0.157552 | 0.151289 | 2.27481  | 0.210412 | 64.8634  | 3.35E-12 | 1.88E-11 |
| LOC114307248 | 8.864812 | 7.312218 | 7.852515 | 28.35678 | 32.85144 | 33.4346  | -2.08454 | 4.147081 | 942.0641 | 2.17E-45 | 1.58E-43 |
| LOC114307252 | 6.082673 | 6.70201  | 6.9908   | 14.38116 | 13.78017 | 14.59158 | -1.21935 | 4.093918 | 378.4946 | 7.86E-34 | 2.45E-32 |

|              |          |          |          |          |          |          |          |          |          |          |          |
|--------------|----------|----------|----------|----------|----------|----------|----------|----------|----------|----------|----------|
| LOC114307264 | 1.217912 | 1.459841 | 1.467671 | 0.071418 | 0        | 0.053997 | 4.814691 | -0.60472 | 74.52483 | 2.14E-13 | 1.33E-12 |
| LOC114307270 | 0.979632 | 1.085415 | 1.007476 | 3.176941 | 3.163226 | 2.940551 | -1.69892 | 3.010981 | 342.0087 | 2.96E-32 | 8.29E-31 |
| LOC114307334 | 0.612383 | 0.784652 | 0.835264 | 0.191932 | 0.302241 | 0.348273 | 1.2457   | -0.27329 | 16.47963 | 0.000105 | 0.000265 |
| LOC114307308 | 2.28284  | 3.020306 | 2.382839 | 1.141194 | 0.898538 | 0.862822 | 1.306598 | 0.03556  | 22.83237 | 6.92E-06 | 2.04E-05 |
| LOC114307341 | 0.806747 | 0.656063 | 0.886406 | 1.98252  | 1.924483 | 1.827455 | -1.38417 | 1.473046 | 81.72086 | 3.08E-14 | 2.06E-13 |
| LOC114307346 | 10.75617 | 10.07256 | 11.64009 | 1.915977 | 1.431213 | 1.337181 | 2.709993 | 2.786258 | 511.3241 | 1.11E-38 | 5.1E-37  |
| LOC114307350 | 0.330543 | 0.297752 | 0.330165 | 0.622718 | 0.602131 | 0.611237 | -1.03791 | 1.260143 | 41.80577 | 5.26E-09 | 2.19E-08 |
| LOC114307367 | 3.237047 | 3.526374 | 4.568742 | 1.483054 | 1.017035 | 0.795756 | 1.708931 | 1.521359 | 96.10283 | 5.37E-15 | 3.84E-14 |
| LOC114307366 | 0.957299 | 0.884857 | 0.784944 | 0.41557  | 0.347656 | 0.39275  | 1.085437 | 0.507951 | 23.89529 | 4.47E-06 | 1.35E-05 |
| LOC114307371 | 18.08009 | 17.45308 | 16.38836 | 39.64484 | 39.0332  | 42.32965 | -1.3257  | 5.451071 | 1009.017 | 2.24E-50 | 2.39E-48 |
| LOC114307327 | 1.564307 | 1.575995 | 1.764    | 0.523827 | 0.471364 | 0.396049 | 1.713656 | -0.20624 | 30.63369 | 3.1E-07  | 1.07E-06 |
| LOC114307376 | 3.333583 | 3.339823 | 3.489703 | 0.52487  | 1.239794 | 0.793676 | 1.841693 | 1.339803 | 102.2328 | 2.25E-16 | 1.79E-15 |
| LOC114307396 | 2.11398  | 2.171535 | 2.139346 | 0.707891 | 0.690077 | 0.942998 | 1.33422  | 1.301053 | 61.40731 | 9.35E-12 | 5.02E-11 |
| LOC114307473 | 1.920204 | 2.054038 | 2.124878 | 0        | 0        | 0        | 9.839168 | 1.228002 | 396.5264 | 3.55E-34 | 1.15E-32 |
| LOC114307475 | 4.633787 | 4.530281 | 4.451107 | 0.201758 | 0.238286 | 0.381358 | 3.890501 | 1.439697 | 313.003  | 6.65E-31 | 1.69E-29 |
| LOC114307471 | 0.59037  | 0.44317  | 0.432443 | 1.207336 | 0.809784 | 1.115682 | -1.17081 | -0.0157  | 20.37823 | 1.94E-05 | 5.39E-05 |
| LOC114307533 | 0.87502  | 0.939086 | 0.75111  | 2.584773 | 2.778781 | 3.025358 | -1.81929 | 2.037676 | 190.2804 | 7.87E-24 | 1.17E-22 |
| LOC114307553 | 1.70666  | 1.261421 | 1.423212 | 0.079549 | 0.062634 | 0.048116 | 4.431722 | 1.448218 | 337.9521 | 4.52E-32 | 1.24E-30 |
| LOC114307556 | 9.422143 | 8.898132 | 9.064402 | 3.630772 | 3.355922 | 3.461234 | 1.287972 | 2.1504   | 102.8643 | 1.61E-16 | 1.3E-15  |
| LOC114307578 | 0.717464 | 0.516135 | 0.76641  | 0.21737  | 0.17115  | 0.46565  | 1.082081 | -0.29586 | 12.05851 | 0.000798 | 0.001745 |
| LOC114307685 | 6.9432   | 6.567143 | 7.679642 | 15.06165 | 13.71409 | 12.15108 | -1.04543 | 2.773923 | 110.4367 | 2.83E-17 | 2.42E-16 |
| LOC114307646 | 0.999191 | 1.421162 | 1.155634 | 2.485532 | 2.559186 | 2.312905 | -1.14758 | 0.133664 | 22.21577 | 8.94E-06 | 2.6E-05  |
| LOC114307723 | 12.86703 | 13.62283 | 12.4486  | 3.613278 | 3.755366 | 3.642521 | 1.714941 | 4.226802 | 694.7546 | 7.6E-44  | 5.02E-42 |
| LOC114307657 | 4.646753 | 5.118982 | 4.597233 | 1.791781 | 1.583538 | 2.045891 | 1.29473  | 2.320891 | 112.0778 | 1.96E-17 | 1.7E-16  |
| LOC114307733 | 17.4216  | 17.30884 | 17.46484 | 4.201443 | 4.244323 | 4.225456 | 1.935439 | 3.886222 | 767.4    | 1.46E-45 | 1.07E-43 |
| LOC114307805 | 474.0542 | 451.986  | 453.4899 | 201.1414 | 204.4688 | 209.6787 | 1.059348 | 8.362583 | 1599.508 | 1.67E-21 | 2.03E-20 |

|              |          |          |          |          |          |          |          |          |          |          |          |
|--------------|----------|----------|----------|----------|----------|----------|----------|----------|----------|----------|----------|
| LOC114307771 | 7.746179 | 8.338788 | 8.791634 | 3.868453 | 2.924055 | 3.626778 | 1.155177 | 1.117059 | 41.46658 | 5.91E-09 | 2.45E-08 |
| LOC114307810 | 9.062835 | 8.072989 | 8.031658 | 20.39411 | 21.05056 | 20.47885 | -1.40311 | 4.66432  | 649.5299 | 1.08E-42 | 6.62E-41 |
| LOC114307816 | 0.329929 | 0.577887 | 0.886127 | 1.266142 | 1.311734 | 1.158827 | -1.1728  | -0.303   | 15.7775  | 0.000144 | 0.000355 |
| LOC114307832 | 1.173016 | 1.0273   | 1.002433 | 0.347492 | 0.24873  | 0.155248 | 2.031157 | 1.249595 | 112.0287 | 2E-17    | 1.73E-16 |
| LOC114307851 | 2.985533 | 2.651779 | 2.811711 | 0.927    | 0.849325 | 1.07043  | 1.459973 | 2.621602 | 173.0937 | 1.35E-22 | 1.8E-21  |
| LOC114307859 | 1.207696 | 1.39303  | 1.100394 | 0.267729 | 0.674562 | 0.688233 | 1.012414 | 0.010186 | 13.76472 | 0.00036  | 0.000834 |
| LOC114307910 | 10.20935 | 8.432838 | 9.70367  | 3.853034 | 5.056249 | 3.350137 | 1.102311 | 2.541812 | 88.78139 | 1.39E-14 | 9.59E-14 |
| LOC114307936 | 0.112438 | 0.126605 | 0.247082 | 0.708562 | 0.633    | 0.803584 | -2.25263 | 0.850798 | 115.1793 | 1.81E-17 | 1.57E-16 |
| LOC114307969 | 62.75051 | 58.27799 | 60.36011 | 10.59429 | 8.910334 | 10.24009 | 2.507439 | 4.972036 | 2161.465 | 2.87E-64 | 9.31E-62 |
| LOC114308002 | 1.410933 | 0.907833 | 0.99659  | 3.114428 | 2.452196 | 2.839521 | -1.41745 | 0.280591 | 36.42435 | 3.57E-08 | 1.37E-07 |
| LOC114308019 | 2.17563  | 2.33528  | 1.831938 | 0.184809 | 0.203717 | 0.307402 | 3.038604 | 0.887566 | 156.3665 | 2.59E-21 | 3.11E-20 |
| LOC114308012 | 5.065704 | 4.152156 | 5.183927 | 9.795364 | 9.685103 | 11.41613 | -1.20784 | 4.215926 | 337.5451 | 1.41E-26 | 2.59E-25 |
| LOC114308068 | 1.793994 | 1.451899 | 1.416754 | 0.152867 | 0.441328 | 0.308208 | 2.20305  | 0.148703 | 57.51919 | 3.06E-11 | 1.57E-10 |
| LOC114308043 | 4.983714 | 3.991793 | 4.064522 | 0.420286 | 0.514763 | 0.423688 | 3.144496 | 1.540665 | 262.8114 | 2.58E-28 | 5.37E-27 |
| LOC114308069 | 14.32762 | 13.90134 | 14.13599 | 3.21872  | 2.44131  | 2.612188 | 2.266682 | 3.950068 | 950.0365 | 2.63E-49 | 2.6E-47  |
| LOC114308099 | 1.352625 | 1.212802 | 1.1284   | 2.732035 | 2.437928 | 1.893475 | -1.01696 | 1.144577 | 35.09561 | 5.8E-08  | 2.18E-07 |
| LOC114308118 | 2.267923 | 1.860818 | 2.008943 | 0.671134 | 0.85555  | 0.821544 | 1.266603 | 1.330469 | 56.85152 | 3.76E-11 | 1.91E-10 |
| LOC114308106 | 1.092673 | 0.874914 | 0.960452 | 0.132419 | 0.278033 | 0.233609 | 2.024726 | -0.24203 | 38.30651 | 1.81E-08 | 7.16E-08 |
| LOC114308137 | 0.46872  | 0.281481 | 0.423446 | 0.037869 | 0.044725 | 0.014316 | 3.469533 | -0.46421 | 62.30252 | 7.15E-12 | 3.88E-11 |
| LOC114308148 | 4.983793 | 4.416647 | 5.070279 | 20.71974 | 19.97973 | 21.4371  | -2.20572 | 4.090181 | 1118.953 | 3.18E-52 | 4.02E-50 |
| LOC114308147 | 4.135152 | 3.530246 | 4.085684 | 8.028198 | 7.42435  | 7.243769 | -1.04931 | 4.072642 | 274.4008 | 6.06E-29 | 1.33E-27 |
| LOC114308202 | 0.563315 | 0.616913 | 0.500237 | 0.063124 | 0.099403 | 0.07424  | 2.69284  | 1.375642 | 190.9998 | 7.02E-24 | 1.04E-22 |
| LOC114308114 | 0.432857 | 0.487396 | 0.292676 | 12.16601 | 12.91511 | 14.41533 | -5.11754 | 2.653711 | 1095.972 | 7.5E-52  | 9.38E-50 |
| LOC114308291 | 2.312877 | 2.753112 | 2.033004 | 13.33395 | 12.29578 | 12.26116 | -2.51428 | 1.800198 | 279.9353 | 3.08E-29 | 6.91E-28 |
| LOC114308355 | 6.645982 | 7.001478 | 6.52774  | 1.647438 | 1.657453 | 1.799168 | 1.870431 | 2.348715 | 220.6248 | 7.8E-26  | 1.35E-24 |
| LOC114308359 | 0.668307 | 0.739075 | 0.616285 | 1.69213  | 1.332327 | 1.59101  | -1.28568 | 1.51172  | 72.33806 | 3.93E-13 | 2.39E-12 |

|              |          |          |          |          |          |          |          |          |          |          |          |
|--------------|----------|----------|----------|----------|----------|----------|----------|----------|----------|----------|----------|
| LOC114308365 | 1.6908   | 1.435945 | 1.621597 | 0.625133 | 0.79984  | 0.590805 | 1.125845 | 1.29815  | 44.57669 | 2.03E-09 | 8.79E-09 |
| LOC114308368 | 0.239155 | 0.134644 | 0.525538 | 5.760311 | 6.075826 | 5.176932 | -4.30438 | 0.611709 | 233.6549 | 1.23E-26 | 2.27E-25 |
| LOC114308369 | 0.661064 | 0.697834 | 0.74147  | 0.175247 | 0.039424 | 0.264998 | 2.005676 | 0.062784 | 44.03052 | 3.06E-09 | 1.3E-08  |
| LOC114308334 | 0.894373 | 0.914102 | 0.861739 | 0.050025 | 0.039388 | 0.018911 | 4.490458 | 0.180078 | 136.4106 | 1.16E-19 | 1.22E-18 |
| LOC114308410 | 1.987414 | 1.717681 | 1.73512  | 0.273398 | 0.553538 | 0.398651 | 2.010661 | 1.680178 | 149.6009 | 1.11E-20 | 1.25E-19 |
| LOC114308474 | 0.259985 | 0.250922 | 0.367272 | 0.450101 | 0.567031 | 0.629569 | -1.03133 | 0.117398 | 17.69098 | 6.17E-05 | 0.00016  |
| LOC114308481 | 1.378656 | 1.108831 | 1.051077 | 2.250421 | 2.0538   | 2.513543 | -1.04434 | 0.931348 | 32.92216 | 1.3E-07  | 4.7E-07  |
| LOC114308445 | 0.04025  | 0        | 0.014741 | 0.512165 | 0.748915 | 0.51631  | -4.91674 | -0.48301 | 115.09   | 1E-17    | 8.94E-17 |
| LOC114308497 | 1.618741 | 1.729227 | 1.915392 | 0.301803 | 0.178222 | 0.399323 | 2.443715 | -0.23498 | 50.5195  | 2.81E-10 | 1.32E-09 |
| LOC114308505 | 9.718625 | 9.227212 | 8.719525 | 2.717958 | 2.983694 | 2.963893 | 1.56374  | 3.656921 | 444.9268 | 2.08E-36 | 8.12E-35 |
| LOC114308450 | 0.96685  | 1.052382 | 1.115434 | 0.087878 | 0.11532  | 0.110737 | 3.163927 | 0.249594 | 103.9423 | 1.25E-16 | 1.02E-15 |
| LOC114308525 | 1.614668 | 1.416712 | 1.751063 | 4.002517 | 3.991833 | 4.726608 | -1.51956 | 2.095204 | 143.041  | 3.17E-20 | 3.46E-19 |
| LOC114308587 | 1.193405 | 1.007829 | 1.201974 | 4.067621 | 2.918023 | 2.460324 | -1.53677 | 0.416618 | 45.2775  | 1.6E-09  | 6.99E-09 |
| LOC114308625 | 3.117257 | 3.354024 | 3.729511 | 1.385173 | 1.685533 | 1.475723 | 1.046641 | 1.154918 | 35.49918 | 5E-08    | 1.89E-07 |
| LOC114308673 | 0        | 0        | 0        | 1.144807 | 0.901383 | 0.681952 | -8.28272 | -0.45402 | 149.0996 | 1.44E-20 | 1.61E-19 |
| LOC114308674 | 0        | 0        | 0        | 0.637652 | 0.597697 | 0.505067 | -7.84562 | -0.86731 | 111.5465 | 2.88E-17 | 2.46E-16 |
| LOC114308705 | 1.578009 | 1.387391 | 1.63882  | 0        | 0.03094  | 0.05942  | 5.310971 | 0.278556 | 161.0993 | 1.1E-21  | 1.36E-20 |
| LOC114308709 | 4.797035 | 5.127575 | 4.936644 | 2.087924 | 2.282205 | 2.386496 | 1.024047 | 3.999455 | 247.4098 | 1.91E-27 | 3.69E-26 |
| LOC114308720 | 3.659066 | 3.211255 | 4.138615 | 12.32489 | 12.47684 | 11.68508 | -1.82979 | 2.175279 | 211.2228 | 3.1E-25  | 5.14E-24 |
| LOC114308723 | 11.67996 | 10.32793 | 10.46727 | 5.054079 | 4.350044 | 5.375955 | 1.032306 | 4.113642 | 248.3542 | 6.4E-27  | 1.2E-25  |
| LOC114308775 | 12.53535 | 12.79541 | 11.78124 | 2.451515 | 2.59475  | 2.795468 | 2.128428 | 3.343531 | 598.5839 | 2.61E-41 | 1.45E-39 |
| LOC114308776 | 35.26017 | 35.85445 | 35.17432 | 7.662609 | 7.663898 | 6.419788 | 2.189633 | 3.485298 | 690.8442 | 9.5E-44  | 6.24E-42 |
| LOC114308780 | 12.22787 | 11.30471 | 11.50248 | 5.303545 | 4.871806 | 4.442285 | 1.163805 | 4.114374 | 322.346  | 2.38E-31 | 6.25E-30 |
| LOC114308809 | 3.189722 | 2.683151 | 3.401601 | 0        | 0.053711 | 0.025788 | 6.523354 | 1.382478 | 399.6584 | 1.09E-34 | 3.66E-33 |
| LOC114308808 | 1.024506 | 1.025415 | 0.839784 | 3.281317 | 2.862907 | 3.062017 | -1.76713 | 1.927884 | 169.5567 | 2.49E-22 | 3.23E-21 |
| LOC114308827 | 0.837903 | 0.838647 | 0.764764 | 0.298185 | 0.444179 | 0.292473 | 1.121315 | 2.004679 | 67.06659 | 1.96E-12 | 1.12E-11 |

|              |          |          |          |          |          |          |          |          |          |          |          |
|--------------|----------|----------|----------|----------|----------|----------|----------|----------|----------|----------|----------|
| LOC114308892 | 0.919284 | 0.77098  | 1.010055 | 0.057624 | 0.081668 | 0.095849 | 3.369577 | 1.279881 | 234.9252 | 1.03E-26 | 1.91E-25 |
| LOC114308895 | 0.345989 | 0.206966 | 0.285114 | 1.061347 | 1.160651 | 0.995635 | -2.02735 | 0.948367 | 110.0506 | 3.09E-17 | 2.64E-16 |
| LOC114308929 | 1.086685 | 0.727549 | 0.806748 | 3.737243 | 2.858506 | 2.744884 | -1.90196 | 1.05977  | 103.8615 | 1.28E-16 | 1.04E-15 |
| LOC114308942 | 3.650569 | 3.72517  | 3.455934 | 7.198964 | 7.231066 | 7.078034 | -1.09421 | 3.338118 | 205.5143 | 7.31E-25 | 1.17E-23 |
| LOC114308977 | 0.036636 | 0        | 0        | 10.65577 | 10.3564  | 10.64969 | -9.46615 | 3.158881 | 2041.847 | 3.27E-63 | 9.82E-61 |
| LOC114308980 | 4.055838 | 4.167481 | 4.202156 | 11.18533 | 10.48447 | 10.34327 | -1.46779 | 3.878945 | 507.9879 | 1.43E-38 | 6.46E-37 |
| LOC114308954 | 2.91253  | 3.34257  | 3.138578 | 0.916349 | 1.523172 | 1.231687 | 1.214966 | 0.343814 | 25.60057 | 2.24E-06 | 7.02E-06 |
| LOC114308986 | 1.118152 | 1.322785 | 1.321869 | 0.102916 | 0.081033 | 0.058359 | 3.846668 | 0.618607 | 166.6    | 4.16E-22 | 5.31E-21 |
| LOC114309074 | 0.453989 | 0.319494 | 0.561168 | 1.856858 | 1.380804 | 1.403914 | -1.86843 | 0.129118 | 52.93232 | 1.29E-10 | 6.28E-10 |
| LOC114309071 | 0.767271 | 0.684636 | 0.866892 | 0.263163 | 0.207205 | 0.38799  | 1.310746 | 1.198354 | 52.16431 | 1.65E-10 | 7.95E-10 |
| LOC114309073 | 11.52467 | 10.60465 | 12.93495 | 4.843229 | 4.670671 | 4.882426 | 1.178537 | 3.582782 | 246.896  | 2.04E-27 | 3.94E-26 |
| LOC114309100 | 0.116196 | 0.239867 | 0.042556 | 1.161729 | 1.635385 | 1.357448 | -3.48579 | 0.28013  | 139.8057 | 2.29E-19 | 2.34E-18 |
| LOC114309126 | 0.373696 | 0.26777  | 0.348384 | 0.555801 | 0.615909 | 0.68481  | -1.01351 | 0.402745 | 21.42052 | 1.25E-05 | 3.56E-05 |
| LOC114309139 | 0.461031 | 0.51912  | 0.492483 | 1.583024 | 1.503036 | 1.372888 | -1.69613 | 1.248839 | 102.1195 | 1.92E-16 | 1.54E-15 |
| LOC114309153 | 1.040646 | 0.305678 | 1.043975 | 1.398219 | 2.007544 | 1.989932 | -1.27735 | -0.11501 | 20.39649 | 2.2E-05  | 6.08E-05 |
| LOC114309193 | 1.148238 | 0.733816 | 1.21047  | 2.482185 | 3.597852 | 2.815057 | -1.63372 | 1.987124 | 124.2107 | 2.88E-15 | 2.11E-14 |
| LOC114309224 | 1.30561  | 1.381908 | 1.233695 | 0.237337 | 0.560613 | 0.502441 | 1.428589 | 0.146723 | 28.87173 | 6.13E-07 | 2.05E-06 |
| LOC114309235 | 1.083567 | 1.161995 | 1.077174 | 2.29802  | 2.695613 | 1.985673 | -1.17382 | 1.044606 | 43.9606  | 2.5E-09  | 1.07E-08 |
| LOC114309241 | 16.81551 | 17.29224 | 15.85974 | 32.39006 | 30.03596 | 31.20643 | -1.0102  | 6.00149  | 768.8362 | 2.17E-41 | 1.21E-39 |
| LOC114309254 | 0        | 0.126448 | 0.041129 | 1.565066 | 1.553745 | 1.646329 | -4.84953 | -0.53879 | 111.1656 | 2.4E-17  | 2.07E-16 |
| LOC114309274 | 3.061297 | 2.824059 | 2.715175 | 0.603422 | 1.16139  | 0.608305 | 1.727391 | 0.676289 | 58.46644 | 2.28E-11 | 1.19E-10 |
| LOC114309310 | 2.575891 | 2.325359 | 2.610652 | 1.130261 | 0.79458  | 0.762997 | 1.404279 | 1.258482 | 64.05902 | 4.24E-12 | 2.35E-11 |
| LOC114309339 | 1.136517 | 1.226394 | 1.335457 | 0.487802 | 0.610008 | 0.564066 | 1.029953 | 0.845576 | 27.80948 | 9.29E-07 | 3.05E-06 |
| LOC114309340 | 2.857413 | 3.056094 | 2.833938 | 0.980629 | 0.941014 | 0.892025 | 1.533918 | 2.789002 | 217.7857 | 1.18E-25 | 2.02E-24 |
| LOC114309350 | 4.070828 | 3.600258 | 3.99295  | 0.907284 | 1.004576 | 1.243321 | 1.763503 | 2.271415 | 186.4468 | 1.46E-23 | 2.13E-22 |
| LOC114309356 | 1.681087 | 1.675217 | 1.782433 | 3.544863 | 3.127964 | 3.246233 | -1.04843 | 3.189547 | 164.1572 | 6.4E-22  | 8.05E-21 |

|              |          |          |          |          |          |          |          |          |          |          |          |
|--------------|----------|----------|----------|----------|----------|----------|----------|----------|----------|----------|----------|
| LOC114309358 | 2.898566 | 2.767684 | 3.159297 | 5.880287 | 5.360111 | 5.322341 | -1.00804 | 3.478226 | 189.4941 | 8.93E-24 | 1.32E-22 |
| LOC114309359 | 1.489913 | 1.761521 | 1.289161 | 6.195455 | 6.95728  | 6.885512 | -2.25299 | 2.758803 | 434.6466 | 4.97E-36 | 1.87E-34 |
| LOC114309384 | 47.13607 | 47.65457 | 49.92222 | 17.68812 | 21.9314  | 21.14413 | 1.14048  | 5.638146 | 303.6906 | 2.78E-09 | 1.19E-08 |
| LOC114309409 | 4.299947 | 4.803607 | 4.538526 | 0.307738 | 0.242302 | 0.139603 | 4.212479 | 1.158935 | 269.9323 | 1.05E-28 | 2.25E-27 |
| LOC114309415 | 1.773668 | 1.933408 | 1.4927   | 0.651702 | 0.324081 | 0.414933 | 1.835099 | 0.88737  | 73.85486 | 2.58E-13 | 1.59E-12 |
| LOC114309416 | 5.888945 | 6.107443 | 5.82717  | 1.721572 | 2.094876 | 1.964276 | 1.506831 | 2.78885  | 210.4692 | 3.47E-25 | 5.73E-24 |
| LOC114309436 | 0.881478 | 0.44113  | 0.681549 | 5.044497 | 3.177494 | 5.025495 | -2.79314 | 1.252503 | 196.6826 | 1.58E-21 | 1.92E-20 |
| LOC114309449 | 9.172018 | 7.925312 | 9.811841 | 3.558525 | 4.155573 | 3.627631 | 1.136172 | 3.127863 | 159.4502 | 1.83E-21 | 2.22E-20 |
| LOC114309508 | 0.167729 | 0.206568 | 0.224604 | 0.714611 | 0.765218 | 0.756414 | -2.01259 | 1.472066 | 159.3038 | 1.52E-21 | 1.86E-20 |
| LOC114309494 | 6.786404 | 6.702592 | 6.896632 | 2.063096 | 2.652102 | 2.546685 | 1.367626 | 2.594082 | 151.2373 | 6.69E-21 | 7.71E-20 |
| LOC114309528 | 55.24473 | 51.6302  | 56.83386 | 22.59177 | 21.52429 | 23.28157 | 1.174737 | 5.337621 | 757.4337 | 2.46E-45 | 1.78E-43 |
| LOC114309540 | 0.7436   | 0.66784  | 0.787844 | 1.383915 | 1.216352 | 1.533005 | -1.01445 | 1.872855 | 58.33227 | 2.38E-11 | 1.23E-10 |
| LOC114309553 | 3.845117 | 3.967284 | 4.542975 | 1.082093 | 1.128329 | 0.84025  | 1.917296 | 2.281135 | 210.1794 | 3.62E-25 | 5.97E-24 |
| LOC114309573 | 3.908528 | 3.265253 | 3.740338 | 0        | 0        | 0.057762 | 6.943534 | 0.520283 | 217.5163 | 1.22E-25 | 2.09E-24 |
| LOC114309566 | 1.503667 | 1.015875 | 1.453885 | 0        | 0.043044 | 0        | 5.974962 | -0.33966 | 102.0831 | 1.93E-16 | 1.55E-15 |
| LOC114309568 | 1.518285 | 1.649247 | 1.668203 | 6.68887  | 5.982439 | 7.217632 | -2.14651 | 2.825193 | 434.4015 | 5.07E-36 | 1.9E-34  |
| LOC114309608 | 166.9913 | 164.1581 | 167.936  | 61.2578  | 56.77236 | 61.32376 | 1.371709 | 6.482755 | 1628.536 | 4.89E-59 | 1.06E-56 |
| LOC114309635 | 0.728502 | 0.969435 | 0.844096 | 0.264857 | 0.417079 | 0.273069 | 1.280386 | 0.508588 | 30.93129 | 2.77E-07 | 9.61E-07 |
| LOC114309738 | 3.239852 | 3.357512 | 3.528258 | 7.192452 | 7.714942 | 9.378572 | -1.37809 | 2.617328 | 164.8448 | 5.66E-22 | 7.16E-21 |
| LOC114309667 | 0.199032 | 0.179288 | 0.43737  | 2.315553 | 2.278986 | 1.53188  | -2.97631 | -0.14857 | 86.43657 | 9.02E-15 | 6.31E-14 |
| LOC114309745 | 0.564353 | 0.56857  | 0.522171 | 2.348756 | 2.359492 | 2.245294 | -2.16965 | 1.569909 | 195.6156 | 3.38E-24 | 5.12E-23 |
| LOC114309673 | 2.116469 | 2.524712 | 2.09521  | 5.104422 | 4.978823 | 4.262509 | -1.19157 | 2.361605 | 104.377  | 1.13E-16 | 9.23E-16 |
| LOC114309778 | 0.658655 | 0.662183 | 0.947692 | 0        | 0        | 0        | 9.217909 | 0.653038 | 238.9636 | 2.09E-25 | 3.51E-24 |
| LOC114309781 | 40.59891 | 41.89664 | 41.77578 | 18.23814 | 19.31185 | 18.23516 | 1.049073 | 5.692838 | 717.2494 | 2.15E-44 | 1.47E-42 |
| LOC114309791 | 2.515047 | 2.513912 | 2.408728 | 0.293384 | 0.221376 | 0.203334 | 3.288069 | 2.609601 | 581.3618 | 8.1E-41  | 4.31E-39 |
| LOC114309766 | 2.68951  | 1.792308 | 3.256615 | 0.099777 | 0.078561 | 0        | 5.240373 | -0.24787 | 99.95836 | 3.49E-16 | 2.74E-15 |



|              |          |          |          |          |          |          |          |          |          |          |          |
|--------------|----------|----------|----------|----------|----------|----------|----------|----------|----------|----------|----------|
| LOC114309820 | 19.71745 | 19.13769 | 18.02409 | 8.733626 | 8.031826 | 8.378178 | 1.074242 | 5.72799  | 741.2838 | 1.2E-44  | 8.29E-43 |
| LOC114309821 | 4.838691 | 5.011267 | 4.790776 | 1.673842 | 1.770157 | 1.538501 | 1.450207 | 3.443306 | 339.9383 | 3.67E-32 | 1.02E-30 |
| LOC114309798 | 4.528732 | 3.824507 | 5.55005  | 17.57306 | 15.83088 | 15.32133 | -1.90398 | 1.878603 | 183.4947 | 2.37E-23 | 3.38E-22 |
| LOC114309837 | 0        | 0        | 0.021035 | 2.575299 | 3.342971 | 4.131021 | -8.52514 | 1.431792 | 544.6929 | 3.3E-36  | 1.27E-34 |
| LOC114309840 | 15.86979 | 15.50113 | 14.8738  | 5.213576 | 5.911192 | 5.203211 | 1.392777 | 3.040127 | 225.3351 | 3.97E-26 | 7.01E-25 |
| LOC114309891 | 1.045993 | 0.576363 | 0.953654 | 0.080912 | 0.031854 | 0.091762 | 3.509611 | -0.43322 | 63.89586 | 4.45E-12 | 2.46E-11 |
| LOC114309849 | 0.82712  | 0.627946 | 0.895022 | 0.273374 | 0.37668  | 0.41338  | 1.014185 | 1.496702 | 40.07944 | 1.03E-08 | 4.19E-08 |
| LOC114309807 | 6.449234 | 5.926315 | 5.986484 | 12.19519 | 11.45884 | 11.56373 | -1.03936 | 2.881437 | 125.0586 | 1.18E-18 | 1.14E-17 |
| LOC114309863 | 1.175639 | 0.557376 | 1.019782 | 3.036935 | 2.833991 | 3.741848 | -1.89024 | 0.068744 | 51.59952 | 1.98E-10 | 9.46E-10 |
| LOC114309866 | 1.148101 | 0.861839 | 1.042081 | 1.935807 | 1.78616  | 2.14967  | -1.04402 | 1.463104 | 47.34865 | 7.97E-10 | 3.59E-09 |
| LOC114309913 | 12.25769 | 11.36906 | 12.51837 | 29.49547 | 28.05968 | 31.48007 | -1.40573 | 4.023039 | 487.376  | 6.86E-38 | 2.98E-36 |
| LOC114309914 | 0.898193 | 0.594919 | 0.677272 | 0.288133 | 0.252074 | 0.26626  | 1.332617 | -0.08024 | 21.62273 | 1.15E-05 | 3.28E-05 |
| LOC114309955 | 3.225778 | 3.410742 | 3.609132 | 1.573238 | 1.351326 | 1.405747 | 1.142535 | 1.922925 | 70.589   | 6.43E-13 | 3.83E-12 |
| LOC114309920 | 2.322483 | 2.449598 | 2.454905 | 0.801619 | 0.631168 | 0.848512 | 1.554201 | 0.783154 | 55.45664 | 5.81E-11 | 2.9E-10  |
| LOC114310042 | 64.00033 | 59.65317 | 67.48751 | 8.564003 | 9.414766 | 8.307526 | 2.753552 | 3.601768 | 1037.46  | 7.17E-51 | 8.18E-49 |
| LOC114310021 | 0.223803 | 0.324002 | 0.316159 | 1.714515 | 1.647398 | 1.472061 | -2.58319 | 0.867934 | 154.5736 | 3.6E-21  | 4.26E-20 |
| LOC114310027 | 0.027671 | 0.031157 | 0.091209 | 10.66372 | 11.20821 | 11.86559 | -7.81469 | 2.656757 | 1354.997 | 1.11E-55 | 1.84E-53 |
| LOC114310028 | 0.464079 | 0.368162 | 0.521492 | 0.153384 | 0.060385 | 0.072481 | 2.190054 | -0.18069 | 43.75903 | 2.68E-09 | 1.15E-08 |
| LOC114309995 | 0.812729 | 0.844736 | 1.030361 | 2.613855 | 2.952871 | 3.608816 | -1.88597 | 0.000836 | 50.27729 | 3.04E-10 | 1.43E-09 |
| LOC114309997 | 1.944614 | 1.827709 | 2.03068  | 0.438218 | 0.529059 | 0.530118 | 1.830513 | 1.248992 | 102.3577 | 1.81E-16 | 1.46E-15 |
| LOC114310033 | 5.348997 | 6.840555 | 5.930353 | 2.287887 | 1.662836 | 2.295315 | 1.433686 | 2.35265  | 128.0437 | 1.4E-18  | 1.34E-17 |
| LOC114310089 | 2.051891 | 2.079382 | 2.80202  | 0        | 0        | 0.040287 | 6.802403 | 0.396172 | 190.0645 | 8.15E-24 | 1.21E-22 |
| LOC114310090 | 2.868127 | 3.352144 | 2.99177  | 5.543727 | 7.015089 | 5.937879 | -1.12102 | 1.968208 | 73.46521 | 2.87E-13 | 1.77E-12 |
| LOC114310140 | 3.691851 | 3.370554 | 3.091628 | 5.767941 | 6.512315 | 7.597405 | -1.08268 | 2.941027 | 130.2676 | 8.07E-19 | 7.88E-18 |
| LOC114310146 | 0.338217 | 0.344562 | 0.371613 | 0.073193 | 0.034578 | 0.09961  | 2.216591 | -0.1648  | 46.02325 | 1.24E-09 | 5.5E-09  |
| LOC114310162 | 0.306739 | 0.263153 | 0.240734 | 1.88521  | 2.216073 | 2.589721 | -3.14869 | 1.397907 | 290.7778 | 8.45E-30 | 1.97E-28 |

|              |          |          |          |          |          |          |          |          |          |          |          |
|--------------|----------|----------|----------|----------|----------|----------|----------|----------|----------|----------|----------|
| LOC114310180 | 0.982484 | 0.957872 | 1.03342  | 0.02178  | 0.025724 | 0.008234 | 5.593832 | 1.401311 | 394.3354 | 1.77E-34 | 5.88E-33 |
| LOC114310183 | 0.435978 | 0.423018 | 0.438259 | 0.059018 | 0.106215 | 0.082869 | 2.242021 | 0.832127 | 102.0791 | 1.94E-16 | 1.55E-15 |
| LOC114310195 | 3.072974 | 2.995364 | 3.15803  | 5.613909 | 5.623724 | 6.219673 | -1.02865 | 3.152671 | 154.7124 | 3.51E-21 | 4.16E-20 |
| LOC114310196 | 1.373101 | 1.293682 | 1.477894 | 2.580952 | 2.754104 | 2.888555 | -1.09842 | 2.756492 | 125.2352 | 1.14E-18 | 1.1E-17  |
| LOC114310205 | 7.047028 | 6.191487 | 6.128858 | 1.010385 | 0.823955 | 0.927619 | 2.712165 | 2.49275  | 413.1091 | 3.24E-35 | 1.13E-33 |
| LOC114310240 | 1.515555 | 1.399872 | 1.795297 | 0.086094 | 0.237256 | 0.195279 | 3.009957 | 1.215735 | 190.7381 | 7.32E-24 | 1.09E-22 |
| LOC114310328 | 1.135234 | 0.96431  | 0.853436 | 6.299571 | 5.758243 | 5.693599 | -2.6782  | 2.412628 | 449.413  | 1.43E-36 | 5.63E-35 |
| LOC114310334 | 0.628038 | 0.59624  | 0.595338 | 0.044771 | 0.15863  | 0.03385  | 2.772684 | -0.07179 | 64.86868 | 3.34E-12 | 1.87E-11 |
| LOC114310345 | 0.191817 | 0.174845 | 0.200721 | 0.448314 | 0.549091 | 0.590035 | -1.59782 | 0.306442 | 47.25924 | 8.21E-10 | 3.7E-09  |
| LOC114310353 | 1.026051 | 0.8817   | 0.919692 | 0.147251 | 0.077294 | 0.074221 | 3.145272 | -0.53614 | 54.87299 | 6.97E-11 | 3.46E-10 |
| LOC114310374 | 0.610664 | 0.500077 | 0.622165 | 0.141283 | 0.079458 | 0.06104  | 2.558037 | 0.025967 | 65.31995 | 2.93E-12 | 1.65E-11 |
| LOC114310391 | 1.510045 | 1.533313 | 1.525825 | 0.073527 | 0.135082 | 0.111182 | 3.672557 | 0.951335 | 207.936  | 5.07E-25 | 8.23E-24 |
| LOC114310384 | 8.168889 | 9.037344 | 8.096779 | 3.322983 | 3.883727 | 3.493816 | 1.127944 | 2.672391 | 112.3466 | 1.84E-17 | 1.6E-16  |
| LOC114310411 | 4.631629 | 4.681117 | 4.905025 | 1.166554 | 1.078245 | 0.997039 | 2.031702 | 1.688937 | 164.4214 | 6.1E-22  | 7.7E-21  |
| LOC114310413 | 0.986043 | 0.621758 | 0.953398 | 1.505659 | 2.032295 | 2.005723 | -1.22405 | 0.124959 | 24.68461 | 3.24E-06 | 9.97E-06 |
| LOC114310414 | 0.293699 | 0.132282 | 0        | 4.377913 | 4.371832 | 3.794399 | -4.84383 | 0.173617 | 183.3141 | 2.61E-23 | 3.71E-22 |
| LOC114310474 | 0.534594 | 0.502896 | 0.520464 | 0.184518 | 0.26151  | 0.260416 | 1.009735 | 0.827468 | 26.47914 | 1.57E-06 | 5.04E-06 |
| LOC114310484 | 570.1624 | 566.8096 | 570.0803 | 1287.566 | 1254.717 | 1290.711 | -1.2722  | 11.5086  | 8469.368 | 1.47E-22 | 1.95E-21 |
| LOC114310492 | 5.125344 | 5.306783 | 5.92271  | 11.08397 | 9.654669 | 9.959143 | -1.00849 | 3.024103 | 128.9802 | 5.23E-19 | 5.17E-18 |
| LOC114310518 | 113.497  | 111.7528 | 115.8491 | 213.0051 | 209.9653 | 213.8193 | -1.00604 | 7.410897 | 1132.059 | 2.97E-24 | 4.54E-23 |
| LOC114310505 | 15.71867 | 13.94729 | 15.40042 | 4.213639 | 4.095258 | 3.733365 | 1.804209 | 2.984277 | 334.0911 | 6.78E-32 | 1.85E-30 |
| LOC114310519 | 0.203807 | 0.141742 | 0.197587 | 6.625144 | 6.717851 | 7.011052 | -5.31977 | 4.173706 | 3458.692 | 4.45E-73 | 2.58E-70 |
| LOC114310524 | 1.487393 | 1.406006 | 1.402236 | 0.500707 | 0.578218 | 0.542616 | 1.291607 | 1.730019 | 78.72919 | 6.83E-14 | 4.42E-13 |
| LOC114310525 | 0.049388 | 0.023833 | 0.015504 | 0.602794 | 0.70688  | 0.678783 | -4.51717 | 0.591586 | 245.1844 | 2.57E-27 | 4.93E-26 |
| LOC114310563 | 0.523284 | 0.474247 | 0.588977 | 0.348013 | 0.146141 | 0.105249 | 1.379698 | -0.07651 | 21.58395 | 1.19E-05 | 3.4E-05  |
| LOC114310529 | 3.120862 | 2.639766 | 3.346987 | 0.135722 | 0.106863 | 0.184707 | 4.277029 | 1.71869  | 403.2113 | 7.88E-35 | 2.7E-33  |

|              |          |          |          |          |          |          |          |          |          |          |          |
|--------------|----------|----------|----------|----------|----------|----------|----------|----------|----------|----------|----------|
| LOC114310539 | 4.261989 | 3.587744 | 4.20407  | 1.584161 | 2.20229  | 1.759175 | 1.003156 | 2.708471 | 88.32772 | 7.24E-15 | 5.11E-14 |
| LOC114310581 | 0.159678 | 0.128426 | 0.300762 | 2.239193 | 1.730416 | 2.382721 | -3.51375 | 0.63566  | 191.0618 | 6.95E-24 | 1.03E-22 |
| LOC114310583 | 1.557949 | 1.954098 | 1.75512  | 0.394339 | 0.5363   | 0.406565 | 1.85017  | 0.834246 | 74.86721 | 1.95E-13 | 1.22E-12 |
| LOC114310586 | 0.122712 | 0.112266 | 0.101122 | 0.641322 | 0.614729 | 0.474344 | -2.43962 | 0.469606 | 106.206  | 7.41E-17 | 6.13E-16 |
| LOC114310679 | 0.481366 | 0.216807 | 0.564156 | 1.341723 | 1.607607 | 1.234966 | -1.81271 | -0.1552  | 39.98145 | 9.96E-09 | 4.04E-08 |
| LOC114310642 | 12.73499 | 11.31008 | 12.71146 | 1.467249 | 1.668713 | 2.095425 | 2.679002 | 1.293558 | 184.7994 | 1.91E-23 | 2.76E-22 |
| LOC114310658 | 1.055593 | 1.078028 | 1.051933 | 0.290063 | 0.404067 | 0.320527 | 1.525771 | 0.861653 | 56.77144 | 3.85E-11 | 1.96E-10 |
| LOC114310634 | 1.228173 | 1.188143 | 1.12137  | 0.377341 | 0.420899 | 0.499268 | 1.32161  | 0.586679 | 36.32986 | 3.69E-08 | 1.41E-07 |
| LOC114310645 | 1.401005 | 1.577529 | 1.748068 | 0.043166 | 0        | 0        | 6.552772 | 0.175028 | 160.4534 | 1.24E-21 | 1.52E-20 |
| LOC114310716 | 1.356976 | 1.406686 | 1.538299 | 2.819132 | 2.682125 | 2.753136 | -1.04392 | 1.580874 | 52.44314 | 1.51E-10 | 7.29E-10 |
| LOC114310729 | 0.032194 | 0.181251 | 0.141491 | 20.54149 | 21.61098 | 20.88472 | -7.55657 | 3.347076 | 2298.952 | 2.04E-65 | 7.46E-63 |
| LOC114310748 | 105.5292 | 103.187  | 106.3437 | 3.888512 | 2.884195 | 3.493897 | 4.844433 | 5.67691  | 7917.921 | 1.44E-86 | 3.05E-83 |
| LOC114310752 | 3.43817  | 3.161958 | 3.421651 | 6.249979 | 6.054662 | 6.457249 | -1.00887 | 3.026362 | 134.038  | 1.87E-19 | 1.92E-18 |
| LOC114310761 | 34.89691 | 32.92141 | 34.35584 | 13.24644 | 12.18235 | 14.30455 | 1.256964 | 5.558376 | 910.7523 | 7.03E-48 | 6.14E-46 |
| LOC114310792 | 4.729632 | 4.760723 | 4.527379 | 1.237537 | 1.076963 | 1.231137 | 1.876929 | 1.35256  | 115.056  | 1.01E-17 | 9E-17    |
| LOC114310809 | 0.675639 | 0.635465 | 0.585148 | 0.231189 | 0.273045 | 0.32774  | 1.06196  | 0.86228  | 29.67887 | 4.48E-07 | 1.52E-06 |
| LOC114310874 | 0.558845 | 0.56302  | 0.500916 | 0.240603 | 0.168394 | 0.141488 | 1.481274 | -0.25721 | 22.82511 | 6.94E-06 | 2.05E-05 |
| LOC114310864 | 1.737426 | 1.467254 | 1.67036  | 4.293356 | 4.818105 | 4.029612 | -1.53116 | 1.766372 | 118.4855 | 4.79E-18 | 4.38E-17 |
| LOC114310880 | 0.611543 | 0.93163  | 0.750978 | 0.08719  | 0.137301 | 0.164805 | 2.388782 | 0.302268 | 71.27674 | 5.3E-13  | 3.18E-12 |
| LOC114310881 | 129.9315 | 124.7149 | 122.6626 | 292.7463 | 277.9654 | 277.8559 | -1.27455 | 8.805402 | 2565.598 | 2.45E-28 | 5.11E-27 |
| LOC114310899 | 2.456164 | 2.151049 | 2.773653 | 5.581083 | 5.468534 | 5.407452 | -1.25915 | 2.42068  | 123.9887 | 1.48E-18 | 1.41E-17 |
| LOC114310930 | 1.696965 | 1.558305 | 1.918833 | 0.509138 | 0.589527 | 0.611382 | 1.475426 | 1.132354 | 64.7945  | 3.42E-12 | 1.91E-11 |
| LOC114310934 | 4.21157  | 4.441656 | 4.106028 | 1.293952 | 1.528222 | 1.75282  | 1.353377 | 1.594926 | 77.2339  | 1.02E-13 | 6.53E-13 |
| LOC114310960 | 0.637521 | 0.845464 | 0.809433 | 0.051507 | 0        | 0.019471 | 4.905698 | -0.06815 | 113.0201 | 1.59E-17 | 1.39E-16 |
| LOC114310965 | 9.709294 | 9.527018 | 11.12521 | 0.252139 | 0        | 0.190635 | 6.013121 | 2.173294 | 631.8974 | 1.28E-39 | 6.25E-38 |
| LOC114310977 | 8.661853 | 7.516068 | 8.406487 | 0        | 0.04989  | 0        | 8.556428 | 2.820662 | 1174.68  | 8.3E-53  | 1.09E-50 |

|              |          |          |          |          |          |          |          |          |          |          |          |
|--------------|----------|----------|----------|----------|----------|----------|----------|----------|----------|----------|----------|
| LOC114310979 | 1.822559 | 1.853876 | 1.817415 | 0.542901 | 0.800121 | 0.778842 | 1.242169 | 2.338042 | 103.4409 | 1.41E-16 | 1.14E-15 |
| LOC114310993 | 0.646157 | 0.716023 | 0.822652 | 0.205089 | 0.1468   | 0.112772 | 2.152077 | 0.484599 | 72.41369 | 3.85E-13 | 2.34E-12 |
| LOC114311085 | 5.321077 | 4.395953 | 4.734385 | 2.260484 | 2.317917 | 2.146291 | 1.001537 | 1.907337 | 54.43909 | 8E-11    | 3.95E-10 |
| LOC114311194 | 189.94   | 188.4164 | 190.8504 | 72.52206 | 75.3253  | 77.61996 | 1.230182 | 7.119594 | 1529.378 | 7.33E-39 | 3.41E-37 |
| LOC114311202 | 2.348287 | 2.373959 | 2.278828 | 1.059402 | 0.981338 | 1.083681 | 1.057489 | 1.607445 | 50.65337 | 2.69E-10 | 1.27E-09 |
| LOC114311233 | 2.067984 | 2.47975  | 2.744322 | 0.048821 | 0.07688  | 0.073824 | 4.969165 | 0.603076 | 198.7697 | 2.06E-24 | 3.18E-23 |
| LOC114311244 | 2.721818 | 2.803312 | 3.316561 | 0.937967 | 0.978544 | 1.099212 | 1.434562 | 2.225125 | 125.9238 | 9.85E-19 | 9.57E-18 |
| LOC114311249 | 1.55068  | 1.698872 | 1.657748 | 4.114011 | 3.539164 | 3.456088 | -1.27226 | 0.977711 | 49.94056 | 3.39E-10 | 1.59E-09 |
| LOC114311252 | 3.219963 | 3.172462 | 2.889291 | 6.389872 | 5.837694 | 6.785792 | -1.13802 | 2.429031 | 103.6846 | 1.33E-16 | 1.08E-15 |
| LOC114311313 | 5.589873 | 5.502201 | 5.409689 | 0.471058 | 0.42388  | 0.712305 | 3.222403 | 1.354515 | 241.8013 | 4.04E-27 | 7.66E-26 |
| LOC114311319 | 0.618014 | 0.719878 | 0.468302 | 6.973065 | 6.939202 | 6.795181 | -3.62115 | 3.444418 | 1479.783 | 2.77E-57 | 5.4E-55  |
| LOC114311329 | 12.22711 | 11.41039 | 13.36103 | 0.121457 | 0.095632 | 0.06122  | 6.937765 | 3.057934 | 1414.557 | 1.84E-56 | 3.25E-54 |
| LOC114311335 | 13.73321 | 12.88429 | 13.21048 | 26.80217 | 24.15085 | 26.10268 | -1.05606 | 5.788086 | 777.8807 | 8.48E-46 | 6.36E-44 |
| LOC114311348 | 0.05524  | 0.0622   | 0.060695 | 0.502083 | 0.454622 | 0.626357 | -3.22153 | -0.56473 | 74.61463 | 2.09E-13 | 1.3E-12  |
| LOC114311356 | 13.76737 | 14.83192 | 13.68822 | 0.25243  | 0.141968 | 0.05453  | 6.511462 | 3.415176 | 1788.904 | 9.15E-59 | 1.97E-56 |
| LOC114311370 | 0.184061 | 0.35529  | 0.433363 | 1.768552 | 1.505403 | 1.373287 | -2.35152 | 0.142829 | 76.90625 | 1.12E-13 | 7.12E-13 |
| LOC114311384 | 5.18463  | 4.819191 | 4.511377 | 8.7922   | 8.566197 | 10.47342 | -1.04699 | 2.634931 | 100.748  | 2.65E-16 | 2.1E-15  |
| LOC114311400 | 10.2037  | 10.153   | 10.3684  | 4.130661 | 3.83238  | 4.43595  | 1.202077 | 3.895054 | 328.7335 | 1.2E-31  | 3.19E-30 |
| LOC114311424 | 1.309559 | 1.16736  | 1.004209 | 0.099189 | 0.136672 | 0.13124  | 3.101653 | 0.615479 | 132.3567 | 2.62E-19 | 2.66E-18 |
| LOC114311437 | 0.133301 | 0.041694 | 0.081369 | 0.471174 | 0.413385 | 0.580162 | -2.58025 | 0.267478 | 94.87599 | 1.36E-15 | 1.02E-14 |
| LOC114311462 | 0.517261 | 0.40635  | 0.396514 | 0.196805 | 0.051652 | 0.132265 | 1.739462 | -0.30905 | 27.3299  | 1.12E-06 | 3.64E-06 |
| LOC114311500 | 0.054755 | 0.123308 | 0.106954 | 0.287545 | 0.452806 | 0.401361 | -2.14203 | 0.292906 | 71.97148 | 5.13E-13 | 3.09E-12 |
| LOC114311490 | 0.926765 | 0.920766 | 1.093148 | 0.297299 | 0.50718  | 0.449557 | 1.087973 | 0.715041 | 27.36034 | 1.11E-06 | 3.6E-06  |
| LOC114311501 | 1.131684 | 1.339067 | 1.180203 | 0.174339 | 0.082361 | 0.079087 | 3.366044 | 0.209608 | 105.3963 | 8.93E-17 | 7.35E-16 |
| LOC114311535 | 0.309494 | 0.253447 | 0.247312 | 1.227503 | 0.563788 | 1.546796 | -2.11936 | -0.35714 | 42.17615 | 6.69E-09 | 2.76E-08 |
| LOC114311522 | 0.917254 | 1.109331 | 1.194459 | 2.099694 | 1.993599 | 2.521347 | -1.15316 | 0.593861 | 31.37543 | 2.34E-07 | 8.18E-07 |

|              |          |          |          |          |          |          |          |          |          |          |          |
|--------------|----------|----------|----------|----------|----------|----------|----------|----------|----------|----------|----------|
| LOC114311559 | 0.982052 | 0.884631 | 0.976798 | 0.263081 | 0.310712 | 0.255739 | 1.664088 | 0.912935 | 68.55506 | 1.15E-12 | 6.68E-12 |
| LOC114311621 | 0.042925 | 0.034524 | 0.08759  | 0.323269 | 0.263308 | 0.320266 | -2.54252 | -0.1344  | 71.36407 | 5.17E-13 | 3.11E-12 |
| LOC114311605 | 0        | 0        | 0        | 2.501247 | 1.444225 | 1.765042 | -8.08121 | -0.64459 | 128.8411 | 7.37E-19 | 7.21E-18 |
| LOC114311641 | 0.04948  | 0        | 0.027183 | 1.079356 | 1.0269   | 1.428119 | -5.3926  | -0.39619 | 134.534  | 1.69E-19 | 1.75E-18 |
| LOC114311632 | 0.076832 | 0.155723 | 0.168837 | 1.173201 | 1.341621 | 1.520608 | -3.44569 | 0.569491 | 181.9637 | 3.05E-23 | 4.32E-22 |
| LOC114311636 | 9.429778 | 9.455061 | 10.03669 | 3.955766 | 3.959285 | 4.072267 | 1.163207 | 4.05352  | 330.7315 | 9.68E-32 | 2.6E-30  |
| LOC114311638 | 0.758075 | 0.711326 | 0.954398 | 0.028709 | 0.022605 | 0.065119 | 4.152133 | -0.11319 | 99.61117 | 3.47E-16 | 2.72E-15 |
| LOC114311692 | 2.897451 | 2.211266 | 2.54684  | 0.058523 | 0.138237 | 0.176989 | 4.142333 | 0.45775  | 156.1228 | 2.71E-21 | 3.24E-20 |
| LOC114311666 | 2.878247 | 2.469257 | 3.033371 | 0.035593 | 0.056049 | 0.080732 | 5.382481 | 1.203555 | 331.2884 | 9.12E-32 | 2.46E-30 |
| LOC114311731 | 5.668314 | 6.794284 | 7.353073 | 1.329546 | 1.57026  | 1.407321 | 2.08052  | 1.762255 | 170.5176 | 2.11E-22 | 2.76E-21 |
| LOC114311751 | 0.495209 | 0.501844 | 0.489696 | 1.305293 | 1.488457 | 1.599447 | -1.67307 | 0.31263  | 51.87591 | 1.81E-10 | 8.69E-10 |
| LOC114311764 | 3.744559 | 3.603076 | 3.949731 | 1.18812  | 1.500676 | 1.235165 | 1.410747 | 2.501052 | 146.5483 | 1.62E-20 | 1.8E-19  |
| LOC114311774 | 11.47942 | 10.20566 | 10.55734 | 23.40995 | 24.82759 | 23.91562 | -1.26735 | 4.872797 | 634.6963 | 2.66E-42 | 1.59E-40 |
| LOC114311814 | 3.374951 | 3.679546 | 3.178456 | 7.936622 | 7.552509 | 8.761671 | -1.35259 | 2.717232 | 177.0243 | 6.94E-23 | 9.5E-22  |
| LOC114311817 | 1.494621 | 1.574363 | 1.244895 | 0.832615 | 0.517558 | 0.430721 | 1.213739 | 0.442617 | 26.51748 | 1.55E-06 | 4.96E-06 |
| LOC114311820 | 1.213209 | 0.8861   | 1.333003 | 3.457109 | 3.707568 | 3.965789 | -1.80081 | 1.191922 | 107.5624 | 5.43E-17 | 4.54E-16 |
| LOC114311838 | 1.179778 | 0.940969 | 1.458305 | 2.94886  | 2.603267 | 1.689048 | -1.08876 | 0.205369 | 20.01452 | 2.26E-05 | 6.23E-05 |
| LOC114311935 | 2.858022 | 2.82169  | 2.480325 | 0.338829 | 0.59285  | 0.512356 | 2.355213 | 1.281032 | 149.4994 | 9.26E-21 | 1.05E-19 |
| LOC114312009 | 5.063474 | 5.128037 | 5.259698 | 1.66633  | 1.478617 | 1.659818 | 1.581034 | 2.809328 | 236.0941 | 8.81E-27 | 1.64E-25 |
| LOC114312018 | 1.160375 | 1.020765 | 1.248391 | 0.17578  | 0.121103 | 0.049838 | 3.249076 | 0.747173 | 149.0361 | 1.01E-20 | 1.15E-19 |
| LOC114312020 | 8.022044 | 7.37767  | 7.645807 | 0.59695  | 0.559546 | 0.38686  | 3.811408 | 2.973312 | 902.5061 | 2.12E-48 | 1.93E-46 |
| LOC114312021 | 1.758579 | 1.873121 | 1.305557 | 0.0864   | 0.136056 | 0.065324 | 3.89566  | -0.59081 | 64.11537 | 4.17E-12 | 2.31E-11 |
| LOC114312023 | 0.498991 | 0.374575 | 0.30459  | 1.814152 | 1.983892 | 1.485927 | -2.2405  | 0.272416 | 79.95129 | 4.92E-14 | 3.24E-13 |
| LOC114312029 | 12.40791 | 10.80387 | 11.21978 | 26.75822 | 24.48802 | 25.15645 | -1.24872 | 3.873785 | 367.1773 | 2.35E-33 | 7.08E-32 |
| LOC114312031 | 1.202753 | 1.223236 | 1.349935 | 0        | 0.037021 | 0.017775 | 5.761871 | 0.684902 | 229.8727 | 2.09E-26 | 3.78E-25 |
| LOC114312104 | 5.27026  | 6.10884  | 6.36972  | 2.648697 | 2.573589 | 2.726944 | 1.04804  | 2.080668 | 65.43356 | 2.83E-12 | 1.59E-11 |

|              |          |          |          |          |          |          |          |          |          |          |          |
|--------------|----------|----------|----------|----------|----------|----------|----------|----------|----------|----------|----------|
| LOC114312105 | 2.312925 | 2.432363 | 2.253612 | 0.277655 | 0.187385 | 0.359874 | 2.958497 | 0.932868 | 159.2809 | 1.53E-21 | 1.87E-20 |
| LOC114312115 | 0.37443  | 0.439938 | 0.617103 | 0.843411 | 1.083488 | 1.174669 | -1.2447  | 1.519126 | 62.89344 | 1.17E-11 | 6.24E-11 |
| LOC114312063 | 1.192497 | 0.98124  | 0.730714 | 0        | 0        | 0        | 8.041806 | -0.40287 | 104.7698 | 1.32E-16 | 1.07E-15 |
| LOC114312123 | 0.828728 | 0.71282  | 1.024378 | 0.272003 | 0.313012 | 0.31639  | 1.387672 | 0.686638 | 41.33312 | 6.2E-09  | 2.56E-08 |
| LOC114312180 | 1.506674 | 1.488553 | 1.473881 | 0.724474 | 0.500862 | 0.77487  | 1.058535 | 1.772708 | 54.00118 | 9.18E-11 | 4.53E-10 |
| LOC114312157 | 0.784821 | 1.08922  | 1.183178 | 2.156587 | 2.298863 | 2.307827 | -1.26266 | 1.467179 | 66.57572 | 2.03E-12 | 1.16E-11 |
| LOC114312184 | 6.719542 | 6.68412  | 7.077008 | 2.056918 | 1.744129 | 1.842282 | 1.761572 | 2.914342 | 305.7216 | 1.51E-30 | 3.71E-29 |
| LOC114312185 | 8.189928 | 8.323752 | 8.207764 | 1.449883 | 1.670619 | 1.737899 | 2.227736 | 2.931377 | 451.8216 | 1.18E-36 | 4.64E-35 |
| LOC114312192 | 4.917662 | 4.383678 | 4.896687 | 1.745983 | 2.364533 | 1.70731  | 1.174428 | 2.97664  | 143.8298 | 1.07E-19 | 1.12E-18 |
| LOC114312244 | 1.467921 | 1.414862 | 1.264487 | 0.384252 | 0.655519 | 0.484203 | 1.314138 | 1.332635 | 58.82897 | 2.04E-11 | 1.07E-10 |
| LOC114312277 | 1574.631 | 1450.42  | 1567.764 | 290.3827 | 271.2716 | 280.8635 | 2.341111 | 8.586745 | 7431.034 | 3.38E-85 | 5.98E-82 |
| LOC114312233 | 0.157296 | 0.139162 | 0.185173 | 0.633146 | 0.595005 | 0.555912 | -1.97506 | 0.072989 | 57.75991 | 2.84E-11 | 1.46E-10 |
| LOC114312293 | 7.488029 | 7.220752 | 7.757679 | 0.02355  | 0.018542 | 0.106833 | 7.000488 | 3.117518 | 1455.123 | 5.61E-57 | 1.04E-54 |
| LOC114312336 | 2.992567 | 2.667619 | 2.694381 | 0        | 0        | 0        | 8.700279 | 0.180581 | 175.871  | 1.31E-22 | 1.74E-21 |
| LOC114312375 | 4.192485 | 4.942013 | 3.958675 | 0.119081 | 0.281281 | 0.360134 | 3.884127 | 0.239843 | 124.3269 | 1.38E-18 | 1.32E-17 |
| LOC114312376 | 2.672281 | 2.890207 | 2.279377 | 6.13608  | 6.441792 | 6.282392 | -1.3719  | 1.959742 | 109.4366 | 3.55E-17 | 3.01E-16 |
| LOC114312379 | 12.94195 | 9.642568 | 13.01718 | 42.9557  | 37.87682 | 38.76062 | -1.84239 | 3.623998 | 576.1592 | 2.13E-37 | 8.86E-36 |
| LOC114312397 | 23.33801 | 19.24517 | 20.43854 | 8.235312 | 6.778945 | 9.528386 | 1.255114 | 2.687413 | 132.1479 | 3.46E-19 | 3.47E-18 |
| LOC114312455 | 3.01105  | 2.639881 | 2.62649  | 5.682466 | 5.625627 | 6.476102 | -1.20867 | 2.534122 | 124.0823 | 1.45E-18 | 1.38E-17 |
| LOC114312458 | 2.725384 | 3.319682 | 2.80616  | 0.031159 | 0.049067 | 0.070675 | 5.648664 | 1.453283 | 400.9336 | 9.69E-35 | 3.28E-33 |
| LOC114312413 | 1.632065 | 1.434303 | 0.787266 | 0        | 0        | 0        | 7.656774 | -0.73254 | 76.31643 | 3.8E-13  | 2.31E-12 |
| LOC114312417 | 1.147367 | 1.087944 | 1.327011 | 0.109774 | 0.172865 | 0.082997 | 3.127114 | -0.38922 | 61.22223 | 9.88E-12 | 5.3E-11  |
| LOC114312482 | 1.612216 | 2.002502 | 1.643576 | 2.74944  | 3.639747 | 3.563603 | -1.04344 | 2.228698 | 72.81682 | 4.04E-13 | 2.45E-12 |
| LOC114312512 | 0.239869 | 0.168807 | 0.181193 | 0.436038 | 0.429152 | 0.422396 | -1.21467 | 0.390325 | 30.03604 | 3.9E-07  | 1.33E-06 |
| LOC114312544 | 2.915122 | 2.961314 | 2.541484 | 6.911962 | 8.571539 | 8.492129 | -1.62392 | 2.38895  | 190.1902 | 7.99E-24 | 1.19E-22 |
| LOC114312547 | 14.10645 | 13.72124 | 13.8257  | 28.17118 | 27.7263  | 27.03383 | -1.09736 | 4.259507 | 343.0341 | 2.66E-32 | 7.48E-31 |

|              |          |          |          |          |          |          |          |          |          |          |          |
|--------------|----------|----------|----------|----------|----------|----------|----------|----------|----------|----------|----------|
| LOC114312591 | 3.491781 | 3.975182 | 3.68819  | 0.245481 | 0.57985  | 0.530288 | 2.875347 | 1.741226 | 261.2883 | 3.13E-28 | 6.48E-27 |
| LOC114312621 | 2.208057 | 2.266891 | 2.533118 | 0.590273 | 0.464761 | 0.580173 | 1.989705 | 0.52562  | 68.37351 | 1.21E-12 | 7.02E-12 |
| LOC114312629 | 2.344136 | 2.000905 | 2.326348 | 0.549835 | 0.811728 | 0.935355 | 1.395655 | 0.370104 | 33.50863 | 1.04E-07 | 3.82E-07 |
| LOC114312647 | 12.1767  | 11.21607 | 10.62703 | 23.01067 | 21.97855 | 20.41644 | -1.04477 | 4.714379 | 360.0745 | 4.09E-32 | 1.13E-30 |
| LOC114312695 | 0        | 0.018612 | 0        | 4.507183 | 3.927344 | 4.112012 | -9.02939 | 1.958742 | 851.5155 | 2.23E-47 | 1.87E-45 |
| LOC114312679 | 0.686374 | 0.716305 | 0.790935 | 0.060864 | 0.071883 | 0        | 3.92321  | -0.30234 | 79.40022 | 5.7E-14  | 3.73E-13 |
| LOC114312709 | 2.288755 | 2.239938 | 2.679267 | 0.009721 | 0.045923 | 0.036748 | 6.068571 | 2.772155 | 1018.291 | 6.72E-50 | 6.89E-48 |
| LOC114312705 | 0.178305 | 0.100385 | 0.195911 | 1.539599 | 1.084625 | 0.888349 | -2.92093 | -0.12158 | 86.15168 | 9.71E-15 | 6.77E-14 |
| LOC114312831 | 1.544733 | 1.336035 | 1.377489 | 0.406964 | 0.352472 | 0.461539 | 1.689351 | 0.41255  | 48.38881 | 5.64E-10 | 2.59E-09 |
| LOC114312822 | 0.750056 | 0.907903 | 0.762309 | 0.20452  | 0.187871 | 0.103088 | 2.192376 | -0.17788 | 44.8958  | 1.82E-09 | 7.92E-09 |
| LOC114312855 | 12.70162 | 12.77316 | 15.15888 | 3.264345 | 2.068726 | 4.093388 | 1.997276 | 2.528622 | 228.3236 | 4.24E-22 | 5.4E-21  |
| LOC114312860 | 42.23614 | 43.8736  | 41.94183 | 17.10791 | 16.94475 | 17.09325 | 1.218739 | 5.65942  | 958.0238 | 1.87E-49 | 1.86E-47 |
| LOC114312862 | 0.384298 | 0.356357 | 0.364289 | 0.794469 | 0.517687 | 0.797447 | -1.02439 | 1.135241 | 35.0609  | 5.88E-08 | 2.21E-07 |
| LOC114312900 | 1.709015 | 1.942502 | 2.533213 | 0.3517   | 0.299993 | 0.288069 | 2.612425 | 1.211674 | 156.2789 | 3.24E-21 | 3.86E-20 |
| LOC114312974 | 3.204619 | 3.060523 | 3.392005 | 0.243997 | 0.38423  | 0.553436 | 2.870841 | 1.735257 | 264.5242 | 2.08E-28 | 4.35E-27 |
| LOC114312976 | 5.90788  | 6.094808 | 5.004415 | 2.489877 | 2.031305 | 2.33614  | 1.21278  | 2.865722 | 143.0719 | 3.75E-20 | 4.07E-19 |
| LOC114312977 | 0.411346 | 0.301602 | 0.346855 | 0        | 0        | 0        | 7.848354 | -0.56971 | 93.64229 | 1.83E-15 | 1.36E-14 |
| LOC114312926 | 4.616828 | 4.108522 | 3.627254 | 8.392568 | 9.059391 | 9.51805  | -1.23307 | 3.01571  | 183.9874 | 2.18E-23 | 3.13E-22 |
| LOC114313044 | 3.020584 | 3.462269 | 3.060489 | 0.03288  | 0        | 0        | 7.959358 | 1.464244 | 448.8874 | 1.5E-36  | 5.88E-35 |
| LOC114313046 | 3.147101 | 2.546983 | 3.220124 | 16.41174 | 16.44113 | 17.97734 | -2.61496 | 3.964668 | 1336.426 | 1.99E-55 | 3.14E-53 |
| LOC114313055 | 1.890376 | 2.204579 | 2.47266  | 0.736364 | 0.740841 | 0.649533 | 1.51719  | 1.023571 | 61.80259 | 8.3E-12  | 4.48E-11 |
| LOC114313061 | 4.298704 | 4.36109  | 4.045087 | 0.193423 | 0.121836 | 0.058496 | 5.016534 | 1.666958 | 440.1158 | 3.12E-36 | 1.2E-34  |
| LOC114313072 | 0.082709 | 0.155216 | 0.212042 | 1.854309 | 2.407062 | 2.235601 | -3.95231 | 0.374    | 184.7764 | 1.92E-23 | 2.76E-22 |
| LOC114313086 | 0.909004 | 0.767653 | 0.524349 | 0.330481 | 0.390315 | 0.1874   | 1.188583 | -0.35746 | 13.65474 | 0.000379 | 0.000875 |
| LOC114313099 | 1.19694  | 1.205883 | 0.945969 | 4.08444  | 3.276062 | 3.116982 | -1.73061 | 1.750572 | 140.5596 | 5.13E-20 | 5.51E-19 |
| LOC114313123 | 1.62034  | 1.170947 | 1.275464 | 4.70399  | 4.153754 | 4.420751 | -1.79611 | 1.875524 | 166.9978 | 3.88E-22 | 4.96E-21 |

|              |          |          |          |          |          |          |          |          |          |          |          |
|--------------|----------|----------|----------|----------|----------|----------|----------|----------|----------|----------|----------|
| LOC114313182 | 0.49565  | 0.421423 | 0.455678 | 0.073551 | 0.217169 | 0.208537 | 1.288    | 0.045431 | 21.93658 | 1E-05    | 2.9E-05  |
| LOC114313213 | 0        | 0        | 0        | 0.831359 | 0.509121 | 0.791526 | -8.11456 | -0.61903 | 132.6882 | 3.39E-19 | 3.41E-18 |
| LOC114313239 | 0.016377 | 0.027661 | 0.044985 | 0.654946 | 0.421922 | 0.517693 | -4.20544 | 0.065107 | 153.418  | 4.46E-21 | 5.22E-20 |
| LOC114313251 | 0.813384 | 0.592621 | 0.620332 | 0.295717 | 0.219142 | 0.368254 | 1.092915 | 0.696446 | 26.59426 | 1.5E-06  | 4.82E-06 |
| LOC114313252 | 1.952785 | 1.876589 | 1.84966  | 0.122407 | 0.120474 | 0.023137 | 4.32845  | 0.916219 | 225.7908 | 3.72E-26 | 6.6E-25  |
| LOC114313291 | 2.339353 | 2.118338 | 2.156933 | 0.535283 | 0.608781 | 0.427195 | 1.970774 | 1.381622 | 124.659  | 1.28E-18 | 1.23E-17 |
| LOC114313324 | 0.958793 | 0.616913 | 1.053466 | 2.24089  | 2.352535 | 2.917907 | -1.61434 | -0.33068 | 29.60586 | 4.61E-07 | 1.56E-06 |
| LOC114313326 | 3.130399 | 2.574652 | 2.661874 | 1.731893 | 0.974025 | 1.084958 | 1.078555 | 1.216606 | 36.93422 | 2.96E-08 | 1.15E-07 |
| LOC114313310 | 6.345845 | 7.270766 | 6.523925 | 16.86493 | 15.32383 | 15.88783 | -1.35926 | 4.229135 | 478.9186 | 1.33E-37 | 5.61E-36 |
| LOC114313335 | 0.443815 | 0.603128 | 0.655789 | 0.08346  | 0.087618 | 0.084135 | 2.588982 | -0.41973 | 46.6296  | 1.01E-09 | 4.52E-09 |
| LOC114313415 | 1.296064 | 1.094524 | 1.220605 | 2.103583 | 3.180078 | 2.544729 | -1.23114 | 0.378497 | 30.10901 | 3.79E-07 | 1.3E-06  |
| LOC114313439 | 6.086566 | 4.774951 | 6.002362 | 0.317418 | 0.249924 | 0.274275 | 4.217757 | 1.864038 | 438.5013 | 3.58E-36 | 1.36E-34 |
| LOC114313499 | 79.0449  | 65.50322 | 76.18537 | 5.53539  | 5.901974 | 6.452093 | 3.509784 | 4.21082  | 1880.152 | 3.59E-59 | 7.87E-57 |
| LOC114313503 | 0.630814 | 1.038123 | 1.012994 | 7.40949  | 7.917549 | 8.53652  | -3.26908 | 1.486016 | 325.4942 | 1.7E-31  | 4.48E-30 |
| LOC114313542 | 2.983697 | 2.984025 | 2.952518 | 0.033688 | 0.212201 | 0.152825 | 4.270553 | 1.394295 | 315.7794 | 4.89E-31 | 1.26E-29 |
| LOC114313572 | 7.204942 | 7.604257 | 8.119354 | 13.69433 | 15.24821 | 13.79575 | -1.00768 | 4.025192 | 248.7382 | 1.6E-27  | 3.12E-26 |
| LOC114313560 | 5.815795 | 5.900911 | 6.249616 | 2.381622 | 2.469788 | 2.108104 | 1.264011 | 1.995355 | 88.89996 | 4.82E-15 | 3.46E-14 |
| LOC114313568 | 0.514393 | 0.298945 | 0.546954 | 1.719332 | 1.329994 | 1.938499 | -1.96438 | 0.974833 | 101.4714 | 2.85E-16 | 2.25E-15 |
| LOC114313584 | 12.01335 | 10.87797 | 13.41956 | 24.38591 | 22.63957 | 24.76672 | -1.08715 | 3.459052 | 213.23   | 2.3E-25  | 3.86E-24 |
| LOC114313609 | 0.37274  | 0.304492 | 0.297121 | 0.159429 | 0.125529 | 0.16072  | 1.029509 | 0.094932 | 15.80867 | 0.000142 | 0.00035  |
| LOC114313600 | 0.535158 | 0.32447  | 0.497538 | 4.040948 | 3.417389 | 4.413123 | -3.20466 | 0.717484 | 187.344  | 1.26E-23 | 1.85E-22 |
| LOC114313636 | 4.195231 | 3.707945 | 4.592954 | 1.585371 | 1.485008 | 1.632645 | 1.303761 | 2.532764 | 130.1378 | 4.12E-19 | 4.12E-18 |
| LOC114313690 | 5.828894 | 6.326379 | 5.918913 | 1.262326 | 1.325218 | 1.561756 | 2.003296 | 2.419191 | 254.2257 | 7.78E-28 | 1.56E-26 |
| LOC114313726 | 0.638847 | 0.670846 | 0.64672  | 0.156581 | 0.164382 | 0.226907 | 1.704606 | 0.889232 | 69.59734 | 8.52E-13 | 5.02E-12 |
| LOC114313735 | 1.206186 | 0.953097 | 1.116031 | 0        | 0        | 0        | 8.32621  | -0.15325 | 133.1733 | 3.08E-19 | 3.11E-18 |
| LOC114313821 | 0.757992 | 0.718734 | 0.730559 | 1.982232 | 2.074647 | 2.284613 | -1.63037 | 1.721154 | 131.8612 | 2.9E-19  | 2.94E-18 |



|              |          |          |          |          |          |          |          |          |          |          |          |
|--------------|----------|----------|----------|----------|----------|----------|----------|----------|----------|----------|----------|
| LOC114313832 | 0.299736 | 0.180001 | 0.351288 | 0.726489 | 0.572013 | 0.823915 | -1.44114 | -0.33468 | 23.5698  | 5.11E-06 | 1.53E-05 |
| LOC114313845 | 1.955329 | 1.960414 | 1.618658 | 0        | 0        | 0        | 9.736834 | 1.13075  | 360.8148 | 1.01E-32 | 2.92E-31 |
| LOC114313951 | 1.116055 | 0.897625 | 1.128934 | 0.386436 | 0.253556 | 0.340868 | 1.587958 | 0.341716 | 40.72254 | 7.67E-09 | 3.15E-08 |
| LOC114313981 | 0.158764 | 0.071507 | 0.139553 | 2.13568  | 2.090591 | 1.87657  | -4.07203 | 0.064231 | 154.9184 | 3.38E-21 | 4.02E-20 |
| LOC114314011 | 3.501426 | 3.385059 | 3.147679 | 8.229454 | 6.783327 | 8.215038 | -1.30928 | 2.264349 | 120.7929 | 2.91E-18 | 2.72E-17 |
| LOC114314053 | 3.763419 | 4.208174 | 4.23553  | 0.78389  | 0.561099 | 0.502876 | 2.643388 | 2.442095 | 373.8078 | 1.23E-33 | 3.8E-32  |
| LOC114314083 | 35.02468 | 34.47048 | 34.30969 | 176.5423 | 172.5002 | 176.3958 | -2.44481 | 7.924993 | 6877.16  | 3.9E-86  | 7.76E-83 |
| LOC114314125 | 2.647302 | 2.465647 | 2.693242 | 6.059962 | 6.829666 | 7.276903 | -1.48087 | 2.132226 | 141.5907 | 4.2E-20  | 4.53E-19 |
| LOC114314246 | 0.156011 | 0.070267 | 0.102849 | 0.58138  | 0.73688  | 0.846964 | -2.80775 | 0.722367 | 151.0083 | 7.85E-21 | 8.99E-20 |
| LOC114314249 | 16.87937 | 16.61412 | 17.17605 | 36.81203 | 34.3386  | 38.30533 | -1.21612 | 5.142289 | 775.6977 | 9.48E-46 | 7.05E-44 |
| LOC114314251 | 11.8441  | 11.51539 | 12.96135 | 1.469951 | 1.361636 | 1.242137 | 3.057011 | 3.083603 | 787.4277 | 5.2E-46  | 4E-44    |
| LOC114314216 | 0.532504 | 0.317435 | 0.481835 | 1.879055 | 1.569172 | 1.635954 | -2.00354 | 0.092697 | 59.219   | 1.81E-11 | 9.51E-11 |
| LOC114314190 | 0.666382 | 0.567334 | 0.357162 | 0.029545 | 0.069789 | 0.044677 | 3.267415 | -0.62738 | 50.64201 | 2.7E-10  | 1.27E-09 |
| LOC114314192 | 0.260192 | 0.329598 | 0.285884 | 0.591228 | 0.628443 | 0.737566 | -1.27612 | -0.10519 | 22.95629 | 6.57E-06 | 1.95E-05 |
| LOC114314268 | 6.178647 | 5.720317 | 6.074662 | 1.73051  | 2.030717 | 2.100967 | 1.4992   | 3.699939 | 425.9266 | 1.05E-35 | 3.82E-34 |
| LOC114314196 | 0.023197 | 0.02612  | 0        | 2.234948 | 2.091746 | 2.072367 | -6.81638 | 0.498203 | 296.4859 | 4.34E-30 | 1.04E-28 |
| LOC114314197 | 21.65147 | 22.38678 | 22.07261 | 1.333204 | 1.55176  | 1.709209 | 3.725099 | 4.445998 | 2471.934 | 9.05E-67 | 3.51E-64 |
| LOC114314276 | 0        | 0        | 0.030072 | 2.935387 | 1.919492 | 2.482671 | -7.51736 | 0.443614 | 279.2451 | 3.35E-29 | 7.48E-28 |
| LOC114314308 | 2.130457 | 1.556037 | 1.961229 | 0.10467  | 0.109885 | 0.079138 | 4.136648 | 0.741262 | 193.0875 | 5.03E-24 | 7.55E-23 |
| LOC114314342 | 69.35831 | 65.73804 | 69.59918 | 18.57766 | 19.491   | 18.87488 | 1.739452 | 6.652275 | 2620.692 | 7.31E-68 | 3.06E-65 |
| LOC114314340 | 12.22559 | 12.52511 | 11.76786 | 3.630953 | 3.746132 | 4.070548 | 1.560977 | 2.810754 | 230.0597 | 2.04E-26 | 3.68E-25 |
| LOC114314341 | 2.630394 | 3.484492 | 2.80512  | 0.914127 | 0.775118 | 0.956968 | 1.637587 | 0.678029 | 54.40958 | 8.07E-11 | 3.99E-10 |
| LOC114314379 | 0.39373  | 0.502451 | 0.663332 | 1.097455 | 1.089516 | 0.7576   | -1.01104 | -0.12925 | 13.82176 | 0.000351 | 0.000813 |
| LOC114314424 | 1.021474 | 1.011363 | 0.715973 | 0.06403  | 0.151244 | 0.096822 | 2.966494 | -0.01779 | 75.04294 | 1.86E-13 | 1.16E-12 |
| LOC114314431 | 1.773988 | 1.340792 | 2.055957 | 4.329174 | 4.660802 | 4.60914  | -1.49983 | 1.983824 | 126.9142 | 8.02E-19 | 7.83E-18 |
| LOC114314441 | 10.5596  | 9.118954 | 10.75332 | 1.144445 | 1.023975 | 1.455244 | 2.951974 | 2.583323 | 489.4268 | 5.85E-38 | 2.55E-36 |

|              |          |          |          |          |          |          |          |          |          |          |          |
|--------------|----------|----------|----------|----------|----------|----------|----------|----------|----------|----------|----------|
| LOC114314446 | 1.979165 | 1.098574 | 1.776427 | 0.202691 | 0.19949  | 0.229873 | 2.815898 | 0.140446 | 77.80011 | 8.82E-14 | 5.66E-13 |
| LOC114314471 | 1.864547 | 2.167201 | 1.75127  | 9.94957  | 9.555706 | 10.16787 | -2.46426 | 2.595052 | 457.466  | 7.4E-37  | 2.96E-35 |
| LOC114314481 | 3.759015 | 3.299733 | 3.506444 | 0.83672  | 0.878407 | 1.09654  | 1.790326 | 2.151117 | 177.7194 | 6.18E-23 | 8.49E-22 |
| LOC114314470 | 8.339817 | 7.884573 | 7.477602 | 3.074966 | 2.026988 | 2.595225 | 1.535503 | 2.026525 | 123.5158 | 1.63E-18 | 1.55E-17 |
| LOC114314502 | 1.162354 | 1.061863 | 1.060257 | 0.438537 | 0.533629 | 0.452134 | 1.089961 | 0.229943 | 19.66198 | 2.63E-05 | 7.19E-05 |
| LOC114314531 | 1.264784 | 1.584361 | 1.667606 | 0.402352 | 0.588339 | 0.478038 | 1.486906 | 0.99794  | 57.60811 | 2.97E-11 | 1.53E-10 |
| LOC114314507 | 0.81332  | 0.709742 | 0.737243 | 2.032896 | 1.513327 | 1.732631 | -1.3073  | 0.933434 | 50.37258 | 2.94E-10 | 1.39E-09 |
| LOC114314537 | 2.640347 | 2.477521 | 2.924084 | 1.218966 | 0.839802 | 0.950424 | 1.332139 | 1.448742 | 66.71172 | 1.95E-12 | 1.11E-11 |
| LOC114314579 | 4.132728 | 3.483434 | 4.307273 | 0.042929 | 0        | 0        | 7.899411 | 1.404292 | 428.1791 | 8.65E-36 | 3.18E-34 |
| LOC114314578 | 6.754058 | 6.522796 | 6.5647   | 0        | 0.037181 | 0.035703 | 7.671121 | 1.970821 | 658.7919 | 6.18E-43 | 3.84E-41 |
| LOC114314587 | 0.100111 | 0.169088 | 0.164995 | 9.190212 | 8.239083 | 8.530759 | -5.94038 | 1.425917 | 542.6618 | 1.15E-39 | 5.66E-38 |
| LOC114314621 | 3.642945 | 3.299393 | 3.625594 | 0.599839 | 0.680102 | 0.616787 | 2.365106 | 2.261473 | 300.1324 | 2.85E-30 | 6.88E-29 |
| LOC114314668 | 0.068524 | 0.173606 | 0.150581 | 0.778529 | 0.809144 | 0.659257 | -2.61571 | -0.30766 | 65.86206 | 2.5E-12  | 1.41E-11 |
| LOC114314680 | 0.278013 | 0.121738 | 0.186673 | 16.93014 | 16.69042 | 16.68506 | -6.48721 | 4.093053 | 3609     | 7.01E-74 | 4.46E-71 |
| LOC114314687 | 0.946893 | 0.878047 | 0.795593 | 5.568857 | 5.181955 | 5.20564  | -2.69136 | 0.773193 | 157.3066 | 2.19E-21 | 2.63E-20 |
| LOC114314741 | 3.159536 | 3.504532 | 3.005192 | 0        | 0        | 0        | 9.723165 | 1.119768 | 361.3154 | 9.64E-33 | 2.79E-31 |
| LOC114314784 | 3.759344 | 3.108619 | 4.388707 | 1.815232 | 1.008884 | 1.372442 | 1.344922 | 0.498953 | 33.42757 | 1.08E-07 | 3.93E-07 |
| LOC114314766 | 71.80297 | 72.74874 | 72.3053  | 21.61625 | 23.32887 | 22.14216 | 1.58642  | 6.979861 | 2322.214 | 4.27E-65 | 1.49E-62 |
| LOC114314739 | 0.982614 | 0.737614 | 0.925405 | 0.085058 | 0.066972 | 0.06431  | 3.470518 | -0.46186 | 64.83111 | 3.38E-12 | 1.89E-11 |
| LOC114314798 | 5.594916 | 4.793374 | 5.579404 | 0        | 0        | 0.041792 | 7.956715 | 1.456808 | 453.3484 | 1.04E-36 | 4.12E-35 |
| LOC114314802 | 0.353199 | 0.272112 | 0.2451   | 9.29288  | 8.673854 | 9.427702 | -5.05619 | 2.969011 | 1422.827 | 1.44E-56 | 2.6E-54  |
| LOC114314851 | 1.101566 | 1.043294 | 1.142467 | 0        | 0        | 0.007075 | 8.237187 | 1.722699 | 557.195  | 4.17E-40 | 2.12E-38 |
| LOC114314853 | 2.539642 | 1.865859 | 2.117546 | 0.785807 | 0.747618 | 0.792167 | 1.386379 | 1.353999 | 66.64892 | 1.99E-12 | 1.13E-11 |
| LOC114314913 | 0.703115 | 0.593779 | 0.634588 | 1.917206 | 1.473602 | 1.760157 | -1.49975 | 0.546899 | 49.83432 | 3.51E-10 | 1.64E-09 |
| LOC114314914 | 1.243604 | 0.969435 | 1.086113 | 2.492512 | 2.64712  | 2.015991 | -1.20588 | 0.76496  | 38.18693 | 1.89E-08 | 7.45E-08 |
| LOC114314926 | 0.166945 | 0.266304 | 0.229286 | 0.834557 | 0.876136 | 0.478018 | -1.81224 | 0.093726 | 46.28826 | 1.24E-09 | 5.49E-09 |

|              |          |          |          |          |          |          |          |          |          |          |          |
|--------------|----------|----------|----------|----------|----------|----------|----------|----------|----------|----------|----------|
| LOC114314970 | 2.669634 | 2.649039 | 2.914905 | 6.096477 | 5.492722 | 5.182665 | -1.12429 | 2.933375 | 147.0336 | 1.48E-20 | 1.65E-19 |
| LOC114315006 | 0.934372 | 0.6012   | 1.283292 | 2.48712  | 2.006038 | 1.696979 | -1.20999 | 0.48659  | 29.40973 | 5.3E-07  | 1.79E-06 |
| LOC114314980 | 4.914977 | 4.963259 | 5.164563 | 2.091819 | 2.28909  | 2.439357 | 1.025749 | 2.506502 | 84.23679 | 1.59E-14 | 1.09E-13 |
| LOC114314982 | 1.477571 | 1.697352 | 1.721861 | 0        | 0        | 0.020513 | 7.273613 | 0.826097 | 276.4992 | 4.68E-29 | 1.03E-27 |
| LOC114314962 | 0        | 0        | 0.030292 | 5.312346 | 5.761164 | 5.948973 | -8.74334 | 1.662201 | 705.5357 | 4.13E-44 | 2.77E-42 |
| LOC114314996 | 1.607421 | 1.656999 | 1.542264 | 0.452705 | 0.615677 | 0.435625 | 1.556343 | 0.585002 | 47.68371 | 7.13E-10 | 3.24E-09 |
| LOC114315057 | 1.629838 | 1.543232 | 1.424477 | 3.535105 | 2.968985 | 2.723696 | -1.09323 | 1.93192  | 68.49827 | 1.17E-12 | 6.78E-12 |
| LOC114315066 | 0.318607 | 0.264342 | 0.331642 | 0        | 0        | 0        | 7.821253 | -0.59103 | 92.46076 | 2.44E-15 | 1.79E-14 |
| LOC114315075 | 1.420791 | 1.528174 | 1.561082 | 0.424033 | 0.607035 | 0.553761 | 1.374476 | 0.624756 | 39.78554 | 1.07E-08 | 4.32E-08 |
| LOC114315109 | 0.763752 | 0.762258 | 0.724734 | 0.25243  | 0.248444 | 0.310139 | 1.349182 | -0.02439 | 23.70132 | 4.84E-06 | 1.46E-05 |
| LOC114315110 | 3.750726 | 3.558362 | 3.384545 | 6.789136 | 6.693344 | 6.668591 | -1.01656 | 3.299186 | 172.1968 | 1.58E-22 | 2.09E-21 |
| LOC114315129 | 1.675983 | 1.193913 | 1.76631  | 0.310881 | 0.244778 | 0.235048 | 2.449393 | -0.14537 | 53.96332 | 9.3E-11  | 4.58E-10 |
| LOC114315176 | 4.560432 | 4.062529 | 4.979024 | 11.85792 | 13.59167 | 11.74231 | -1.55795 | 3.169531 | 321.4981 | 2.61E-31 | 6.82E-30 |
| LOC114315222 | 1.909573 | 1.890264 | 2.144241 | 0.190729 | 0.240277 | 0.144204 | 3.245869 | 0.741638 | 154.9493 | 3.36E-21 | 4E-20    |
| LOC114315234 | 73.64414 | 69.41387 | 69.93067 | 30.15006 | 28.73102 | 31.01899 | 1.139222 | 6.597984 | 1156.778 | 1.79E-40 | 9.34E-39 |
| LOC114315243 | 9.711266 | 10.04424 | 8.883764 | 0.339487 | 0.267301 | 0.241578 | 4.988092 | 3.728182 | 2021.64  | 5.01E-63 | 1.46E-60 |
| LOC114315254 | 0.984089 | 1.184502 | 1.230399 | 4.626461 | 4.128416 | 4.384069 | -2.0522  | 1.319616 | 148.8712 | 1.04E-20 | 1.18E-19 |
| LOC114315272 | 35.29795 | 34.18307 | 36.58758 | 11.18404 | 13.24104 | 13.30109 | 1.378232 | 4.989757 | 747.0569 | 1.36E-42 | 8.31E-41 |
| LOC114315296 | 1.97751  | 1.537464 | 1.810644 | 1.027074 | 0.673903 | 0.711828 | 1.066857 | -0.12822 | 14.09743 | 0.000309 | 0.000723 |
| LOC114315350 | 1.287537 | 0.921704 | 1.105504 | 0.418502 | 0.390536 | 0.527362 | 1.19958  | 1.498152 | 55.6046  | 5.54E-11 | 2.78E-10 |
| LOC114315351 | 1.094844 | 1.204343 | 1.045642 | 0.168404 | 0.325462 | 0.127325 | 2.303177 | 1.301039 | 135.2407 | 7.64E-19 | 7.46E-18 |
| LOC114315335 | 4.68367  | 4.087726 | 4.774133 | 1.436109 | 1.184589 | 1.240913 | 1.715747 | 2.233366 | 174.6233 | 1.04E-22 | 1.41E-21 |
| LOC114315460 | 1.643645 | 2.020923 | 1.681393 | 0.892922 | 0.811219 | 0.675111 | 1.071207 | 1.097475 | 34.82329 | 6.41E-08 | 2.39E-07 |
| LOC114315462 | 0.402003 | 0.471515 | 0.386485 | 0.913462 | 0.839101 | 0.851791 | -1.14583 | 0.275883 | 24.87218 | 3E-06    | 9.27E-06 |
| LOC114315487 | 0.721948 | 0.742224 | 0.551815 | 1.82591  | 1.527514 | 1.55308  | -1.36803 | 0.207046 | 32.71314 | 1.41E-07 | 5.06E-07 |
| LOC114315500 | 7.298894 | 6.945815 | 7.17404  | 1.530092 | 1.66943  | 1.834444 | 1.972716 | 3.455981 | 584.3387 | 6.65E-41 | 3.55E-39 |

|              |          |          |          |          |          |          |          |          |          |          |          |
|--------------|----------|----------|----------|----------|----------|----------|----------|----------|----------|----------|----------|
| LOC114315527 | 2.30687  | 2.203262 | 2.625178 | 12.50555 | 12.23436 | 12.201   | -2.47568 | 3.457295 | 940.1053 | 4.03E-49 | 3.93E-47 |
| LOC114315554 | 2.720671 | 2.460059 | 2.128754 | 0.599478 | 1.239023 | 1.076462 | 1.178836 | 0.428916 | 25.2194  | 2.61E-06 | 8.12E-06 |
| LOC114315583 | 4.475503 | 3.561884 | 3.758867 | 2.00197  | 1.777512 | 1.706858 | 1.01193  | 1.916814 | 54.72918 | 7.3E-11  | 3.62E-10 |
| LOC114315593 | 1.947254 | 1.910873 | 1.960239 | 4.548296 | 4.235129 | 4.769506 | -1.32472 | 3.183599 | 256.9325 | 5.48E-28 | 1.11E-26 |
| LOC114315617 | 60.34065 | 61.25141 | 62.84489 | 26.9199  | 27.17143 | 27.84658 | 1.064267 | 5.751625 | 789.3172 | 1.05E-45 | 7.75E-44 |
| LOC114315618 | 1.853129 | 1.42132  | 1.859057 | 0.390569 | 0.192201 | 0.590595 | 2.006588 | 0.361634 | 57.28923 | 3.28E-11 | 1.68E-10 |
| LOC114315611 | 2.149954 | 2.45927  | 1.912293 | 4.77673  | 5.079841 | 5.25315  | -1.32225 | 1.701586 | 87.05352 | 7.7E-15  | 5.42E-14 |
| LOC114315612 | 4.072837 | 3.935288 | 4.958779 | 0.950474 | 0.945311 | 0.756447 | 2.187574 | 1.554012 | 161.7939 | 9.74E-22 | 1.21E-20 |
| LOC114315666 | 1.994128 | 1.621666 | 1.046826 | 0.724994 | 0.221992 | 0.578598 | 1.551799 | 0.584036 | 28.48618 | 1.75E-05 | 4.91E-05 |
| LOC114315711 | 1.543658 | 1.357934 | 1.590076 | 0.613833 | 0.874564 | 0.552501 | 1.024902 | 1.091036 | 31.73387 | 2.04E-07 | 7.19E-07 |
| LOC114315725 | 5.071607 | 5.168734 | 6.019804 | 1.278586 | 1.218655 | 1.068458 | 2.086024 | 1.473983 | 145.1675 | 2.11E-20 | 2.33E-19 |
| LOC114315686 | 4.567145 | 4.924919 | 4.911909 | 1.186036 | 1.798516 | 1.76024  | 1.466928 | 2.01903  | 113.412  | 1.45E-17 | 1.28E-16 |
| LOC114315747 | 0.534499 | 0.394652 | 0.606532 | 0.191139 | 0.213203 | 0.132472 | 1.419459 | 0.361268 | 32.94203 | 1.29E-07 | 4.66E-07 |
| LOC114315758 | 0.521382 | 0.533704 | 0.533805 | 0        | 0        | 0        | 8.11422  | -0.33604 | 115.3087 | 1.26E-17 | 1.11E-16 |
| LOC114315850 | 2.253142 | 1.959497 | 2.093208 | 11.42165 | 11.85087 | 11.95887 | -2.58496 | 3.542189 | 1069.854 | 2.02E-51 | 2.43E-49 |
| LOC114315863 | 0.987653 | 0.97592  | 0.708686 | 2.857946 | 2.365648 | 2.188509 | -1.55516 | 1.357839 | 89.82234 | 3.82E-15 | 2.77E-14 |
| LOC114315872 | 3.455516 | 3.146045 | 2.98382  | 0.933524 | 1.233348 | 1.148436 | 1.411933 | 2.900147 | 196.3346 | 3.02E-24 | 4.6E-23  |
| LOC114315815 | 0.688578 | 0.959942 | 0.414312 | 0.089408 | 0.258122 | 0.15773  | 1.858098 | -0.16441 | 29.89148 | 9.12E-07 | 2.99E-06 |
| LOC114315904 | 0.662054 | 0.692761 | 0.690688 | 1.884261 | 1.617607 | 1.562501 | -1.40378 | 2.440527 | 152.8185 | 4.98E-21 | 5.8E-20  |
| LOC114315915 | 0.973475 | 0.548066 | 1.02098  | 3.860955 | 3.293319 | 3.101598 | -2.08519 | 0.573366 | 87.57052 | 6.75E-15 | 4.78E-14 |
| LOC114315934 | 3.382108 | 3.046597 | 3.524266 | 1.665928 | 1.46785  | 1.319537 | 1.067524 | 1.761262 | 55.73374 | 5.32E-11 | 2.67E-10 |
| LOC114315987 | 0.633562 | 0.604037 | 0.655471 | 0.336263 | 0.264762 | 0.286018 | 1.000512 | 1.630205 | 45.83249 | 1.32E-09 | 5.84E-09 |
| LOC114315963 | 0.486416 | 0.629859 | 0.507724 | 1.98949  | 1.392407 | 1.838459 | -1.77624 | 0.538276 | 65.54575 | 2.74E-12 | 1.55E-11 |
| LOC114315953 | 0.811786 | 0.804381 | 0.998976 | 2.006927 | 1.394283 | 2.008293 | -1.14274 | 0.36865  | 25.81158 | 2.05E-06 | 6.48E-06 |
| LOC114316050 | 2.006988 | 2.082303 | 2.362673 | 0.67755  | 0.820738 | 0.906333 | 1.29661  | 1.671173 | 74.47458 | 2.17E-13 | 1.35E-12 |
| LOC114316026 | 2.962027 | 2.823392 | 2.99672  | 0.133278 | 0.18889  | 0.100768 | 4.249566 | 1.695901 | 404.965  | 6.72E-35 | 2.31E-33 |

|              |          |          |          |          |          |          |          |          |          |          |          |
|--------------|----------|----------|----------|----------|----------|----------|----------|----------|----------|----------|----------|
| LOC114316034 | 0.68084  | 0.596264 | 0.664949 | 3.208712 | 3.24827  | 2.668611 | -2.32155 | 1.168513 | 162.0102 | 9.37E-22 | 1.16E-20 |
| LOC114316038 | 1.958944 | 2.25398  | 2.258228 | 0.272427 | 0.352393 | 0.397235 | 2.525124 | 1.845445 | 243.9595 | 3.02E-27 | 5.78E-26 |
| LOC114316041 | 0.041998 | 0.023645 | 0.069217 | 0.763447 | 0.96178  | 0.981272 | -4.34707 | -0.49067 | 109.0121 | 3.9E-17  | 3.3E-16  |
| LOC114316042 | 0.590638 | 0.468003 | 0.528781 | 0.129239 | 0.140896 | 0.060131 | 2.18263  | 0.897828 | 97.29821 | 6.05E-16 | 4.66E-15 |
| LOC114316095 | 2.054357 | 2.165551 | 1.776951 | 0.015891 | 0.012512 | 0.012015 | 6.994476 | 1.827862 | 571.0272 | 1.62E-40 | 8.5E-39  |
| LOC114316081 | 0.515102 | 0.538575 | 0.242556 | 1.27078  | 1.105893 | 1.719323 | -1.75742 | -0.34861 | 32.76748 | 1.38E-07 | 4.97E-07 |
| LOC114316124 | 0.865905 | 0.975007 | 1.014833 | 1.678998 | 1.98298  | 1.983499 | -1.09751 | -0.32553 | 14.64931 | 0.00024  | 0.000571 |
| LOC114316150 | 0.103409 | 0.116439 | 0.11362  | 1.20307  | 0.769647 | 0.625354 | -2.98983 | -0.44694 | 69.89176 | 7.84E-13 | 4.63E-12 |
| LOC114316154 | 1.104229 | 1.393162 | 1.242498 | 2.442608 | 2.189814 | 2.761031 | -1.09464 | 2.097545 | 75.63685 | 1.58E-13 | 9.92E-13 |
| LOC114316142 | 1.329419 | 1.408868 | 0.945151 | 0.047385 | 0.03731  | 0        | 5.241536 | -0.2441  | 102.4965 | 1.76E-16 | 1.41E-15 |
| LOC114316178 | 2.105579 | 1.664325 | 1.685322 | 4.714751 | 3.652362 | 3.852155 | -1.24924 | 2.692211 | 139.1018 | 1.63E-19 | 1.68E-18 |
| LOC114316208 | 0.74623  | 0.968292 | 0.960471 | 1.87328  | 1.698745 | 1.426098 | -1.0015  | 2.461212 | 75.09365 | 3.43E-13 | 2.09E-12 |
| LOC114316282 | 15.59324 | 15.89298 | 15.53288 | 5.72209  | 5.611685 | 5.758135 | 1.354403 | 4.828888 | 686.8045 | 1.2E-43  | 7.82E-42 |
| LOC114316353 | 15.97161 | 13.55269 | 16.19149 | 4.125269 | 4.604898 | 4.619265 | 1.663187 | 3.361754 | 392.0578 | 2.19E-34 | 7.2E-33  |
| LOC114316390 | 6.519004 | 6.274353 | 5.973872 | 1.327637 | 1.471214 | 1.598622 | 1.975091 | 2.126088 | 207.8775 | 5.11E-25 | 8.3E-24  |
| LOC114316408 | 0.452308 | 0.37165  | 0.470106 | 0.022222 | 0        | 0.050404 | 3.924665 | -0.56961 | 64.34228 | 3.9E-12  | 2.17E-11 |
| LOC114316413 | 4.134298 | 3.263446 | 3.324941 | 1.472092 | 1.525099 | 1.230162 | 1.246324 | 0.891405 | 39.99542 | 9.91E-09 | 4.03E-08 |
| LOC114316425 | 1.095401 | 1.143716 | 1.302036 | 0.343942 | 0.299315 | 0.479029 | 1.532874 | 1.288403 | 75.29853 | 1.73E-13 | 1.09E-12 |
| LOC114316473 | 4.744499 | 5.342295 | 5.192968 | 2.019592 | 2.150625 | 2.090173 | 1.176165 | 3.566124 | 248.7425 | 1.6E-27  | 3.12E-26 |
| LOC114316480 | 24.34038 | 22.25193 | 26.94912 | 57.66479 | 58.04135 | 61.51319 | -1.37535 | 4.774984 | 656.2424 | 1.94E-42 | 1.17E-40 |
| LOC114316515 | 1.203589 | 1.577005 | 1.442655 | 0        | 0        | 0        | 8.632406 | 0.125052 | 164.3508 | 9.31E-22 | 1.16E-20 |
| LOC114316523 | 29.74517 | 29.15552 | 28.26205 | 11.379   | 9.782018 | 11.78419 | 1.300087 | 5.261524 | 812.1705 | 4.49E-43 | 2.81E-41 |
| LOC114316557 | 1.07912  | 1.219276 | 1.193851 | 0.270572 | 0.330211 | 0.240371 | 1.942958 | 2.556656 | 257.046  | 5.4E-28  | 1.1E-26  |
| LOC114316564 | 1.580606 | 2.18164  | 2.296896 | 0.278057 | 0.218933 | 0.420462 | 2.561553 | -0.33424 | 48.79714 | 4.93E-10 | 2.27E-09 |
| LOC114316594 | 4.015471 | 4.717994 | 4.411965 | 10.79043 | 11.39467 | 13.24527 | -1.54637 | 2.830629 | 241.3784 | 4.28E-27 | 8.1E-26  |
| LOC114316657 | 2.787468 | 2.705761 | 3.168318 | 0.786277 | 0.619088 | 1.056854 | 1.689378 | 0.337701 | 45.03993 | 1.73E-09 | 7.55E-09 |

|              |          |          |          |          |          |          |          |          |          |          |          |
|--------------|----------|----------|----------|----------|----------|----------|----------|----------|----------|----------|----------|
| LOC114316720 | 1.911301 | 1.190535 | 1.608531 | 3.40048  | 2.968448 | 2.738674 | -1.03009 | 0.815309 | 28.79448 | 6.31E-07 | 2.11E-06 |
| LOC114316726 | 2.066034 | 1.826615 | 1.74877  | 0.528577 | 0.74475  | 0.67308  | 1.410581 | 1.368667 | 70.21775 | 7.15E-13 | 4.24E-12 |
| LOC114316779 | 0.565508 | 0.227414 | 0.332864 | 1.064706 | 0.54924  | 0.943784 | -1.23422 | -0.05353 | 19.7968  | 2.86E-05 | 7.78E-05 |
| LOC114316784 | 2.043578 | 1.924527 | 1.673817 | 0.675429 | 0.744534 | 0.817074 | 1.214263 | 0.216413 | 23.52795 | 5.19E-06 | 1.56E-05 |
| LOC114316785 | 0.710163 | 0.626992 | 0.647282 | 0.249388 | 0.184809 | 0.277286 | 1.374626 | 0.825844 | 45.84203 | 1.32E-09 | 5.83E-09 |
| LOC114316830 | 1.979572 | 1.907028 | 2.99672  | 0.879635 | 0.661114 | 1.027829 | 1.30853  | 1.167028 | 47.26001 | 1.79E-09 | 7.8E-09  |
| LOC114316832 | 169.5112 | 167.0198 | 161.3495 | 401.6005 | 403.0788 | 399.4975 | -1.37948 | 9.04351  | 3353.786 | 1.06E-31 | 2.84E-30 |
| LOC114316820 | 3.447475 | 2.444128 | 4.068469 | 0.812375 | 0.82239  | 0.350978 | 2.241366 | 0.063316 | 53.40118 | 1.14E-10 | 5.57E-10 |
| LOC114316856 | 6.399156 | 6.491585 | 6.911297 | 0.864336 | 0.779796 | 0.89856  | 2.853552 | 3.48632  | 1021.411 | 1.36E-50 | 1.5E-48  |
| LOC114316857 | 1.26282  | 1.127739 | 1.172209 | 3.443371 | 2.773521 | 2.753051 | -1.41804 | 1.558789 | 89.68226 | 3.95E-15 | 2.86E-14 |
| LOC114316937 | 0.298511 | 0.37246  | 0.363445 | 0.07333  | 0.103927 | 0.099796 | 1.752536 | -0.1233  | 33.57762 | 1.02E-07 | 3.72E-07 |
| LOC114316929 | 6.780035 | 5.089536 | 5.342576 | 12.44939 | 13.91917 | 12.51876 | -1.27551 | 2.068493 | 99.80956 | 3.31E-16 | 2.6E-15  |
| LOC114316953 | 1.162028 | 1.011068 | 1.247751 | 0.096016 | 0.0756   | 0.29038  | 2.697101 | -0.23547 | 55.98628 | 4.92E-11 | 2.48E-10 |
| LOC114316965 | 0.302849 | 0.234443 | 0.298091 | 0.114693 | 0.126427 | 0.060701 | 1.381778 | 0.001269 | 24.14071 | 4.04E-06 | 1.23E-05 |
| LOC114317020 | 0.305407 | 0.534936 | 0.559272 | 1.912271 | 1.21424  | 1.305893 | -1.74229 | -0.1535  | 37.02725 | 2.87E-08 | 1.11E-07 |
| LOC114317015 | 280.4624 | 276.153  | 278.4558 | 88.10514 | 90.90229 | 92.52252 | 1.515165 | 7.860223 | 2689.937 | 1.36E-44 | 9.38E-43 |
| LOC114317043 | 0        | 0        | 0        | 1.190811 | 1.529776 | 1.516355 | -8.11156 | -0.62991 | 135.378  | 1.99E-19 | 2.05E-18 |
| LOC114317105 | 1.312606 | 1.303176 | 1.256123 | 0.07697  | 0.080805 | 0.077593 | 3.897083 | 0.658098 | 177.941  | 5.95E-23 | 8.2E-22  |
| LOC114317121 | 4.667068 | 5.18312  | 5.081072 | 1.859484 | 2.013131 | 2.07956  | 1.211413 | 2.316255 | 101.0138 | 2.49E-16 | 1.97E-15 |
| LOC114317154 | 3.328777 | 3.158762 | 2.890578 | 1.171185 | 0.960575 | 1.199111 | 1.391764 | 2.267008 | 123.581  | 1.61E-18 | 1.53E-17 |
| LOC114317177 | 0        | 0        | 0        | 1.501539 | 1.750656 | 1.659238 | -9.43054 | 0.656905 | 355.7918 | 1.66E-32 | 4.7E-31  |
| LOC114317210 | 1.028948 | 1.572377 | 1.493939 | 0.200405 | 0.368181 | 0.505067 | 1.74551  | -0.30756 | 27.68952 | 9.74E-07 | 3.18E-06 |
| LOC114317226 | 1.808445 | 1.643764 | 1.739635 | 4.409645 | 4.480344 | 4.182472 | -1.43431 | 3.68259  | 429.0941 | 7.99E-36 | 2.95E-34 |
| LOC114317267 | 3.24851  | 3.22676  | 3.389008 | 12.60574 | 12.39884 | 11.89097 | -2.00744 | 4.453891 | 1146.26  | 1.18E-52 | 1.53E-50 |
| LOC114317274 | 0.711255 | 0.667393 | 0.755436 | 1.422227 | 1.323417 | 1.433737 | -1.06935 | 0.477007 | 25.455   | 2.37E-06 | 7.42E-06 |
| LOC114317275 | 271.6569 | 256.8117 | 269.7179 | 559.4954 | 538.0761 | 550.6246 | -1.15159 | 9.020476 | 2437.298 | 6.87E-23 | 9.41E-22 |

|              |          |          |          |          |          |          |          |          |          |          |          |
|--------------|----------|----------|----------|----------|----------|----------|----------|----------|----------|----------|----------|
| LOC114317307 | 0.685966 | 0.813774 | 0.753699 | 3.874492 | 4.014929 | 4.764461 | -2.60321 | 2.642329 | 502.0216 | 2.24E-38 | 9.96E-37 |
| LOC114317283 | 7.771162 | 8.021118 | 8.116022 | 0.882911 | 0.666209 | 0.890057 | 3.189031 | 2.709103 | 613.4341 | 1.01E-41 | 5.75E-40 |
| LOC114317287 | 3.383673 | 3.132674 | 3.676474 | 1.196011 | 1.264567 | 1.265975 | 1.3402   | 1.922707 | 94.40462 | 1.22E-15 | 9.18E-15 |
| LOC114317336 | 3.341925 | 2.40326  | 2.869646 | 1.072063 | 0.924497 | 1.080739 | 1.385885 | 1.126316 | 56.50239 | 4.19E-11 | 2.12E-10 |
| LOC114317329 | 1.000063 | 1.037169 | 1.243392 | 2.679065 | 2.448417 | 3.219193 | -1.45803 | 1.185509 | 72.98723 | 3.28E-13 | 2.01E-12 |
| LOC114317333 | 38.47786 | 36.73841 | 35.35464 | 9.544271 | 9.930323 | 9.690238 | 1.816076 | 5.202633 | 1570.844 | 2.24E-58 | 4.66E-56 |
| LOC114317366 | 2.363814 | 3.078255 | 3.026327 | 5.455311 | 5.619231 | 5.904387 | -1.11789 | 2.659899 | 114.4504 | 1.16E-17 | 1.02E-16 |
| LOC114317404 | 0.389762 | 0.219436 | 0.374717 | 1.062777 | 0.836795 | 0.903975 | -1.57919 | -0.27577 | 29.43312 | 4.92E-07 | 1.66E-06 |
| LOC114317408 | 12.04105 | 12.8629  | 12.72115 | 24.91918 | 26.55842 | 25.03598 | -1.13166 | 4.235003 | 350.5856 | 1.23E-32 | 3.51E-31 |
| LOC114317441 | 22.9875  | 20.27683 | 21.09185 | 9.763104 | 9.495879 | 9.531965 | 1.056322 | 4.945335 | 459.9043 | 6.06E-37 | 2.44E-35 |
| LOC114317471 | 8.09767  | 6.703446 | 8.432235 | 0.718055 | 0.928825 | 0.853127 | 3.090882 | 2.211718 | 400.614  | 9.97E-35 | 3.37E-33 |
| LOC114317536 | 4.25323  | 4.469852 | 4.361654 | 9.371651 | 9.481917 | 10.27415 | -1.26391 | 3.063066 | 211.5092 | 2.97E-25 | 4.94E-24 |
| LOC114317541 | 174.666  | 171.7236 | 181.2862 | 75.9666  | 75.54173 | 75.71341 | 1.109925 | 7.695709 | 1427.195 | 2.32E-26 | 4.18E-25 |
| LOC114317552 | 0        | 0.016293 | 0        | 0.710198 | 0.693805 | 0.954594 | -7.07301 | 0.744285 | 334.2701 | 2.29E-31 | 6.03E-30 |
| LOC114317556 | 1.020415 | 0.89105  | 1.166935 | 3.066317 | 2.175865 | 2.604566 | -1.43649 | 1.425011 | 81.7973  | 3.02E-14 | 2.02E-13 |
| LOC114317604 | 1.221993 | 1.211577 | 1.336714 | 0.127778 | 0.131564 | 0.111472 | 3.236506 | 1.969108 | 373.1198 | 1.32E-33 | 4.05E-32 |
| LOC114317615 | 7.947038 | 8.712173 | 8.654923 | 21.90245 | 18.34601 | 20.49953 | -1.36534 | 4.235072 | 476.1801 | 2.84E-37 | 1.17E-35 |
| LOC114317626 | 4.671265 | 4.354453 | 4.585607 | 1.252848 | 1.37007  | 1.420861 | 1.634183 | 1.268369 | 86.52968 | 8.81E-15 | 6.17E-14 |
| LOC114317664 | 1.347432 | 1.195374 | 1.076713 | 0.630904 | 0.467532 | 0.561185 | 1.033729 | 0.474475 | 21.14851 | 1.4E-05  | 3.96E-05 |
| LOC114317736 | 134.8461 | 137.477  | 131.6342 | 273.475  | 280.9198 | 286.0709 | -1.16215 | 7.976416 | 1629.758 | 5.03E-27 | 9.45E-26 |
| LOC114317738 | 0.890353 | 1.002535 | 0.782614 | 0.431601 | 0.226552 | 0.353513 | 1.316991 | 0.041309 | 23.07937 | 6.25E-06 | 1.86E-05 |
| LOC114317743 | 1.172509 | 1.251087 | 1.171726 | 2.659191 | 2.253586 | 2.125641 | -1.06344 | 3.277724 | 170.9826 | 2.48E-22 | 3.22E-21 |
| LOC114317744 | 3.651178 | 3.629038 | 3.788829 | 7.415626 | 7.193678 | 7.24848  | -1.08545 | 2.89711  | 138.6597 | 7.45E-20 | 7.9E-19  |
| LOC114317721 | 0.471889 | 0.506044 | 0.370346 | 0.612721 | 0.93271  | 1.019172 | -1.05781 | -0.09217 | 15.81021 | 0.000142 | 0.00035  |
| LOC114317791 | 0.761543 | 0.724437 | 0.692474 | 0.023868 | 0        | 0.054138 | 4.569302 | -0.02552 | 113.3878 | 1.46E-17 | 1.28E-16 |
| LOC114317798 | 0.068137 | 0.057541 | 0.131013 | 3.003617 | 2.486852 | 2.949886 | -5.10108 | 1.378977 | 466.3246 | 3.61E-37 | 1.47E-35 |

|              |          |          |          |          |          |          |          |          |          |          |          |
|--------------|----------|----------|----------|----------|----------|----------|----------|----------|----------|----------|----------|
| LOC114317810 | 0.967885 | 1.053509 | 0.70897  | 1.642146 | 1.893278 | 2.438812 | -1.24992 | 0.499602 | 33.27297 | 1.14E-07 | 4.15E-07 |
| LOC114317835 | 23.06269 | 23.14102 | 23.23433 | 9.289718 | 10.75092 | 10.53551 | 1.071345 | 4.500326 | 339.1461 | 3.99E-32 | 1.11E-30 |
| LOC114317838 | 0.039206 | 0.035316 | 0.025846 | 2.166576 | 2.020132 | 1.91828  | -5.96739 | 2.018084 | 798.9972 | 2.9E-46  | 2.26E-44 |
| LOC114317876 | 3.611891 | 3.567323 | 3.775778 | 1.069283 | 1.122557 | 1.035386 | 1.655908 | 2.79094  | 251.9688 | 1.04E-27 | 2.07E-26 |
| LOC114317882 | 16.28383 | 15.79552 | 16.10486 | 5.035239 | 4.715446 | 5.032728 | 1.600147 | 4.893901 | 991.0768 | 4.67E-50 | 4.87E-48 |
| LOC114317885 | 1.992077 | 2.213167 | 2.422248 | 0.844956 | 0.817356 | 0.967395 | 1.217779 | 1.838118 | 73.96661 | 2.5E-13  | 1.55E-12 |
| LOC114317886 | 101.682  | 101.9579 | 100.2646 | 44.45596 | 45.20131 | 45.29178 | 1.065301 | 5.876149 | 844.898  | 2.87E-45 | 2.06E-43 |
| LOC114317905 | 7.460468 | 6.402965 | 6.862091 | 27.78623 | 27.86046 | 30.4938  | -2.1593  | 4.495863 | 1284.059 | 1.05E-54 | 1.59E-52 |
| LOC114317906 | 0.029298 | 0.03299  | 0.11267  | 2.050487 | 1.530615 | 1.711383 | -4.97165 | 0.920265 | 318.0666 | 3.8E-31  | 9.83E-30 |
| LOC114318002 | 5.138912 | 5.709508 | 5.60882  | 10.552   | 10.58085 | 11.33352 | -1.08985 | 3.867088 | 284.6501 | 1.75E-29 | 4E-28    |
| LOC114317981 | 1.405189 | 1.054826 | 1.157954 | 2.625337 | 3.072719 | 2.092232 | -1.19595 | 0.605322 | 32.98738 | 1.27E-07 | 4.59E-07 |
| LOC114318040 | 3.070545 | 2.576122 | 2.249157 | 0.437781 | 0.603214 | 0.579237 | 2.154825 | 0.761701 | 89.50837 | 4.13E-15 | 2.98E-14 |
| LOC114318044 | 2.991825 | 3.271845 | 3.807526 | 6.41677  | 7.147225 | 7.395618 | -1.17298 | 2.879462 | 149.3518 | 9.52E-21 | 1.08E-19 |
| LOC114317984 | 1.353879 | 1.088904 | 1.423811 | 0.457063 | 0.387559 | 0.505067 | 1.409165 | 0.537585 | 38.60193 | 1.63E-08 | 6.47E-08 |
| LOC114317985 | 1.944852 | 2.031593 | 1.699214 | 0.127785 | 0.100614 | 0.06441  | 4.162616 | 0.482597 | 161.273  | 1.07E-21 | 1.32E-20 |
| LOC114318065 | 0.630945 | 0.868319 | 0.66757  | 0.361076 | 0.284299 | 0.321175 | 1.060892 | 0.522565 | 22.43902 | 8.15E-06 | 2.38E-05 |
| LOC114318073 | 14.75555 | 13.81154 | 14.47447 | 0.141422 | 0.445402 | 0.178208 | 5.647257 | 3.072136 | 1275.738 | 1.38E-54 | 2.05E-52 |
| LOC114318135 | 0.338307 | 0.244885 | 0.292059 | 0.922473 | 0.622563 | 0.863514 | -1.53138 | -0.45465 | 24.41844 | 3.61E-06 | 1.1E-05  |
| LOC114318107 | 0.068291 | 0.057672 | 0.056276 | 1.272447 | 1.172935 | 1.126313 | -4.32429 | 0.168452 | 178.9063 | 5.07E-23 | 7.01E-22 |
| LOC114318109 | 14.17179 | 13.87085 | 12.86412 | 1.301487 | 1.296004 | 1.910147 | 3.055778 | 3.422281 | 991.4763 | 6E-49    | 5.73E-47 |
| LOC114318111 | 2.485236 | 1.8889   | 2.730633 | 0.7906   | 0.800347 | 0.426963 | 1.725737 | -0.25809 | 28.83482 | 6.21E-07 | 2.08E-06 |
| LOC114318128 | 2.095171 | 1.561207 | 1.55727  | 0.05601  | 0.0882   | 0.127041 | 4.053072 | 0.020555 | 108.6253 | 4.26E-17 | 3.59E-16 |
| LOC114318153 | 3.262219 | 2.537194 | 2.660538 | 0.061135 | 0.048136 | 0        | 6.075647 | 0.488162 | 199.9271 | 1.72E-24 | 2.68E-23 |
| LOC114318174 | 0.320002 | 0.220196 | 0.244166 | 0.452438 | 0.458016 | 0.586414 | -1.0353  | 0.431305 | 22.47603 | 8.02E-06 | 2.35E-05 |
| LOC114318168 | 14.13118 | 14.5595  | 14.69803 | 43.35479 | 41.77076 | 44.0639  | -1.67956 | 4.982066 | 1248.847 | 3.35E-54 | 4.87E-52 |
| LOC114318169 | 25.79906 | 25.9604  | 26.05396 | 4.73591  | 4.817867 | 5.054144 | 2.305207 | 5.302749 | 2558.134 | 2.07E-67 | 8.33E-65 |



|              |          |          |          |          |          |          |          |          |          |          |          |
|--------------|----------|----------|----------|----------|----------|----------|----------|----------|----------|----------|----------|
| LOC114318203 | 5.86264  | 6.275329 | 5.381194 | 2.412131 | 2.34814  | 2.055851 | 1.262006 | 2.356649 | 109.0509 | 3.87E-17 | 3.28E-16 |
| LOC114318212 | 2.835528 | 3.463374 | 3.326734 | 0.305774 | 0.240757 | 0.330267 | 3.332998 | 1.200454 | 220.6657 | 7.75E-26 | 1.34E-24 |
| LOC114318273 | 16.13172 | 16.63093 | 15.53779 | 39.54375 | 37.78231 | 38.87198 | -1.37083 | 4.587053 | 613.4156 | 1.01E-41 | 5.75E-40 |
| LOC114318311 | 2.220242 | 1.907207 | 1.999361 | 0.665732 | 0.655219 | 0.880845 | 1.359221 | 1.899244 | 93.18688 | 1.65E-15 | 1.23E-14 |
| LOC114318320 | 4.854574 | 4.639111 | 3.895167 | 0.174173 | 0.137138 | 0.131687 | 4.812768 | 2.14016  | 580.3561 | 8.66E-41 | 4.6E-39  |
| LOC114318321 | 0        | 0.036308 | 0.017715 | 0.732709 | 0.669216 | 0.598297 | -5.16598 | -0.59375 | 112.5538 | 1.76E-17 | 1.54E-16 |
| LOC114318339 | 1.122987 | 0.885137 | 0.740324 | 1.973344 | 2.46456  | 1.594881 | -1.22322 | 0.300681 | 27.29282 | 1.14E-06 | 3.69E-06 |
| LOC114318328 | 15.55344 | 15.43768 | 15.70114 | 3.237696 | 2.904963 | 2.874888 | 2.273769 | 3.740047 | 896.6157 | 2.77E-48 | 2.48E-46 |
| LOC114318375 | 42.85349 | 44.42334 | 41.97284 | 17.03908 | 17.13509 | 17.33279 | 1.221766 | 6.04176  | 1164.132 | 6.19E-53 | 8.24E-51 |
| LOC114318378 | 21.83822 | 21.91971 | 21.44555 | 8.590077 | 8.932281 | 8.388984 | 1.225598 | 5.722412 | 985.1376 | 5.98E-50 | 6.15E-48 |
| LOC114318384 | 101.2226 | 96.15173 | 99.2865  | 30.24187 | 28.16462 | 28.60638 | 1.664504 | 7.274767 | 2768.787 | 7.36E-64 | 2.32E-61 |
| LOC114318354 | 3.658181 | 4.328549 | 4.155646 | 1.465236 | 0.443722 | 1.363472 | 1.804115 | 0.429495 | 50.23709 | 3.31E-10 | 1.55E-09 |
| LOC114318531 | 3.252504 | 5.385753 | 5.045169 | 0.695585 | 0.82152  | 1.314776 | 2.102367 | -0.04136 | 44.86522 | 1.84E-09 | 8E-09    |
| LOC114318475 | 2.497381 | 1.485609 | 1.915606 | 0.342626 | 0.505823 | 0.841909 | 1.653472 | 0.785194 | 51.96789 | 1E-09    | 4.47E-09 |
| LOC114318495 | 3.27149  | 3.482238 | 2.723974 | 0.046461 | 0.365817 | 0.105383 | 3.992359 | 1.055206 | 212.8351 | 1.79E-23 | 2.6E-22  |
| LOC114318505 | 2.510104 | 1.957779 | 2.327445 | 0.734519 | 0.946367 | 0.858264 | 1.303363 | 1.964435 | 88.84402 | 4.89E-15 | 3.51E-14 |
| LOC114318539 | 3.570032 | 2.452789 | 3.257705 | 0.934954 | 1.169182 | 0.997963 | 1.468593 | 1.104822 | 60.56128 | 1.21E-11 | 6.42E-11 |
| LOC114318518 | 4.025051 | 4.36071  | 4.446397 | 2.531225 | 1.930721 | 1.345629 | 1.068979 | 2.125161 | 62.03755 | 2.28E-11 | 1.18E-10 |
| LOC114318487 | 3.343403 | 3.837061 | 3.390956 | 1.051911 | 1.44175  | 1.914655 | 1.120577 | 1.844427 | 59.80191 | 2.05E-11 | 1.07E-10 |
| LOC114318489 | 11.08658 | 11.08192 | 11.6088  | 3.788632 | 2.94161  | 3.779509 | 1.58362  | 2.94257  | 255.4346 | 6.65E-28 | 1.34E-26 |
| LOC114318521 | 0.221468 | 0.420816 | 0.30417  | 3.17039  | 2.852867 | 2.701422 | -3.30952 | 1.83629  | 399.808  | 1.07E-34 | 3.62E-33 |
| LOC114318567 | 0.799751 | 1.029164 | 0.690423 | 0.389412 | 0.143085 | 0.314051 | 1.494657 | 0.353793 | 33.98286 | 1.02E-07 | 3.73E-07 |
| LOC114318584 | 0.981141 | 0.946067 | 0.97677  | 0.423714 | 0.380169 | 0.506611 | 1.035981 | 1.991143 | 61.16133 | 1.01E-11 | 5.4E-11  |
| LOC114318588 | 1.181044 | 1.253861 | 1.575733 | 0.552067 | 0.482977 | 0.347834 | 1.446653 | 0.763513 | 46.16833 | 1.18E-09 | 5.25E-09 |
| LOC114318571 | 0.900852 | 0.887562 | 0.816588 | 0.081879 | 0.064469 | 0.030953 | 3.747628 | -0.44953 | 70.64416 | 6.33E-13 | 3.77E-12 |
| LOC114318598 | 0.465182 | 0.611094 | 0.709883 | 1.785195 | 1.997435 | 2.095636 | -1.83613 | 0.619654 | 74.80482 | 1.98E-13 | 1.24E-12 |

|              |          |          |          |          |          |          |          |          |          |          |          |
|--------------|----------|----------|----------|----------|----------|----------|----------|----------|----------|----------|----------|
| LOC114318614 | 0.834358 | 0.801035 | 0.714095 | 0        | 0.012571 | 0        | 6.985    | 0.559583 | 223.8201 | 4.93E-26 | 8.64E-25 |
| LOC114318661 | 37.43355 | 36.89593 | 36.7092  | 76.11519 | 80.05581 | 79.23949 | -1.18988 | 6.41066  | 1228.678 | 1.09E-47 | 9.41E-46 |
| LOC114318670 | 0.433009 | 0.509729 | 0.497391 | 0        | 0.014086 | 0.027051 | 4.764991 | -0.19455 | 103.1482 | 1.51E-16 | 1.22E-15 |
| LOC114318676 | 0        | 0.037575 | 0        | 1.759182 | 1.910512 | 2.018029 | -6.89134 | -0.17829 | 180.8208 | 3.68E-23 | 5.17E-22 |
| LOC114318700 | 52.04696 | 49.72727 | 52.49664 | 97.73707 | 99.80662 | 99.04405 | -1.04874 | 6.858091 | 1092.521 | 3.25E-32 | 9.09E-31 |
| LOC114318762 | 2.537227 | 2.468936 | 2.237089 | 0.189804 | 0.164389 | 0.157855 | 3.718924 | 1.927454 | 418.7943 | 1.96E-35 | 6.97E-34 |
| LOC114318720 | 3.236044 | 3.069133 | 3.530089 | 0.147591 | 0.315422 | 0.382591 | 3.371004 | 2.225418 | 432.1563 | 1.3E-35  | 4.71E-34 |
| LOC114318738 | 2.567766 | 2.749568 | 1.908534 | 0        | 0.036032 | 0.069199 | 5.74022  | 0.664397 | 214.8208 | 2.42E-25 | 4.05E-24 |
| LOC114318739 | 28.37777 | 30.38465 | 30.46692 | 8.846239 | 9.532807 | 10.36042 | 1.522945 | 4.93747  | 874.1924 | 2.86E-47 | 2.36E-45 |
| LOC114318741 | 1.774358 | 1.705124 | 1.915948 | 0.889784 | 0.613012 | 0.861946 | 1.093073 | 1.394728 | 45.1264  | 1.68E-09 | 7.34E-09 |
| LOC114318788 | 0.355056 | 0.469322 | 0.237462 | 0.729616 | 0.773332 | 0.55164  | -1.0461  | 0.094376 | 17.12555 | 7.92E-05 | 0.000202 |
| LOC114318807 | 0.497319 | 0.479983 | 0.57988  | 0.184497 | 0.203374 | 0.306885 | 1.025866 | 0.2738   | 17.77352 | 5.96E-05 | 0.000155 |
| LOC114318814 | 2.573679 | 2.877832 | 2.552882 | 0.64979  | 1.12557  | 1.105395 | 1.33063  | 1.65351  | 73.9389  | 2.52E-13 | 1.56E-12 |
| LOC114318833 | 0.9683   | 0.915855 | 1.404363 | 0        | 0.027718 | 0        | 6.325509 | -0.02917 | 130.8742 | 3.55E-19 | 3.56E-18 |
| LOC114318846 | 0.7712   | 0.893909 | 1.009342 | 0.020616 | 0.06493  | 0.046762 | 4.119593 | 0.444427 | 152.4094 | 5.38E-21 | 6.25E-20 |
| LOC114318847 | 5.720088 | 5.160069 | 5.43363  | 1.408388 | 1.887519 | 1.608587 | 1.615302 | 2.699304 | 216.8632 | 1.35E-25 | 2.29E-24 |
| LOC114318886 | 1.718805 | 1.384158 | 1.733138 | 0.197752 | 0.108992 | 0.149514 | 3.321124 | 1.345646 | 241.7917 | 4.05E-27 | 7.67E-26 |
| LOC114318894 | 0.152698 | 0.128039 | 0.135648 | 0        | 0        | 0        | 8.054467 | -0.39048 | 109.8422 | 4.2E-17  | 3.54E-16 |
| LOC114318931 | 2.179334 | 3.020216 | 1.657748 | 0.152371 | 0.299929 | 0.518413 | 2.621126 | 0.071765 | 63.77487 | 9.28E-12 | 4.99E-11 |
| LOC114318907 | 3.727203 | 3.343231 | 2.707019 | 13.78045 | 11.66404 | 13.80515 | -2.09838 | 1.989192 | 231.5234 | 1.66E-26 | 3.02E-25 |
| LOC114318999 | 5.320684 | 5.105378 | 5.564997 | 2.383138 | 2.388981 | 2.399495 | 1.050619 | 4.17617  | 287.5919 | 1.23E-29 | 2.84E-28 |
| LOC114319020 | 1.616218 | 1.637872 | 2.071774 | 0.065289 | 0        | 0.074044 | 5.098809 | 0.718099 | 210.9067 | 3.5E-25  | 5.79E-24 |
| LOC114319023 | 1.021851 | 1.225641 | 1.452253 | 3.816038 | 4.196929 | 3.495813 | -1.74754 | 2.808593 | 277.3342 | 1.15E-27 | 2.27E-26 |
| LOC114319058 | 1.628266 | 2.214395 | 1.858746 | 5.150988 | 5.417709 | 5.84176  | -1.64073 | 2.419977 | 196.0104 | 3.17E-24 | 4.83E-23 |
| LOC114319104 | 1.648891 | 2.042313 | 2.491095 | 0        | 0        | 0        | 8.268273 | -0.19824 | 124.4641 | 1.81E-18 | 1.71E-17 |
| LOC114319083 | 1.684696 | 1.016929 | 1.393055 | 3.283481 | 2.759313 | 3.437364 | -1.3025  | 1.999045 | 93.28487 | 4.35E-15 | 3.13E-14 |

|              |          |          |          |          |          |          |          |          |          |          |          |
|--------------|----------|----------|----------|----------|----------|----------|----------|----------|----------|----------|----------|
| LOC114319087 | 14.52164 | 15.61479 | 14.7417  | 31.73543 | 30.54248 | 28.50934 | -1.12091 | 5.570015 | 729.9548 | 2E-41    | 1.12E-39 |
| LOC114319092 | 17.00945 | 18.95816 | 16.41216 | 0        | 0        | 0        | 10.28762 | 1.65014  | 534.4594 | 6.23E-39 | 2.91E-37 |
| LOC114319093 | 16.39822 | 14.65927 | 17.65809 | 0.028309 | 0        | 0        | 10.52811 | 3.943076 | 2785.07  | 9.22E-63 | 2.57E-60 |
| LOC114319139 | 1.779377 | 1.494523 | 1.44561  | 0.547878 | 0.539226 | 0.398302 | 1.577131 | 2.439217 | 161.6059 | 1.55E-21 | 1.89E-20 |
| LOC114319171 | 78.5928  | 72.85505 | 72.94488 | 7.760433 | 7.779461 | 8.557859 | 3.110549 | 5.868019 | 5267.424 | 4.74E-81 | 6.56E-78 |
| LOC114319178 | 1.50544  | 1.361656 | 1.355812 | 0        | 0        | 0.033919 | 6.342631 | -0.01665 | 139.0444 | 6.91E-20 | 7.34E-19 |
| LOC114319179 | 38.84003 | 42.53742 | 41.41047 | 16.47075 | 15.08065 | 16.95559 | 1.234762 | 4.850425 | 556.1854 | 4.47E-40 | 2.26E-38 |
| LOC114319229 | 0.012116 | 0        | 0.013313 | 1.057222 | 1.127237 | 1.49875  | -6.9766  | 0.645771 | 322.2512 | 2.41E-31 | 6.31E-30 |
| LOC114319240 | 4.622943 | 3.305634 | 4.70866  | 1.840223 | 1.400632 | 1.994249 | 1.170609 | 1.455492 | 50.64319 | 2.93E-10 | 1.38E-09 |
| LOC114319241 | 9.413831 | 8.053886 | 8.822285 | 0.167771 | 0.264195 | 0.19027  | 5.233263 | 1.595832 | 438.974  | 3.44E-36 | 1.31E-34 |
| LOC114319244 | 8.110972 | 7.029593 | 9.830055 | 30.73963 | 29.62096 | 31.41629 | -1.98234 | 3.604232 | 669.4799 | 5.33E-42 | 3.11E-40 |
| LOC114319271 | 0.990756 | 0.462561 | 0.955831 | 1.888872 | 2.109798 | 2.092361 | -1.43304 | 0.864708 | 53.48056 | 1.27E-10 | 6.19E-10 |
| LOC114319292 | 4.855324 | 5.720416 | 5.406515 | 1.385264 | 1.381567 | 1.346601 | 1.850752 | 3.784868 | 616.514  | 4.07E-41 | 2.2E-39  |
| LOC114319350 | 8.263297 | 7.955308 | 7.626552 | 3.304663 | 3.449596 | 3.747834 | 1.071865 | 3.6426   | 225.3404 | 3.96E-26 | 7.01E-25 |
| LOC114319352 | 0.571539 | 0.575089 | 0.614613 | 0.176844 | 0.087025 | 0.233986 | 1.703942 | 0.047577 | 35.77652 | 4.52E-08 | 1.72E-07 |
| LOC114319335 | 2.212332 | 2.276333 | 2.221231 | 5.547068 | 4.53136  | 4.875491 | -1.25    | 1.541093 | 71.08492 | 5.59E-13 | 3.35E-12 |
| LOC114319405 | 36.89777 | 38.77146 | 38.44381 | 10.24127 | 10.74266 | 10.64678 | 1.743361 | 5.280822 | 1533.412 | 6.19E-58 | 1.26E-55 |
| LOC114319407 | 2.898143 | 2.776848 | 2.709631 | 0.261779 | 0.128823 | 0.074221 | 4.130248 | 1.361246 | 300.3912 | 2.76E-30 | 6.68E-29 |
| LOC114319415 | 4.894862 | 4.5045   | 4.458001 | 0.502544 | 0.721546 | 0.502886 | 2.886978 | 3.25598  | 809.3409 | 5.31E-46 | 4.08E-44 |
| LOC114319416 | 4.165137 | 3.637092 | 3.969335 | 0.69534  | 0.790815 | 1.05145  | 2.079351 | 0.844598 | 92.47601 | 1.97E-15 | 1.45E-14 |
| LOC114319423 | 0.824849 | 0.800965 | 0.881352 | 0.275125 | 0.324936 | 0.208013 | 1.52988  | 1.196589 | 71.04854 | 5.65E-13 | 3.38E-12 |
| LOC114319433 | 0.920647 | 0.79742  | 0.836477 | 1.995413 | 2.356682 | 1.849339 | -1.3803  | 1.347223 | 73.9073  | 2.54E-13 | 1.57E-12 |
| LOC114319445 | 0.81004  | 0.228026 | 0.623017 | 2.429638 | 2.724598 | 1.892642 | -2.14519 | 0.161015 | 63.60277 | 9.06E-12 | 4.88E-11 |
| LOC114319469 | 6.347474 | 6.698486 | 6.632465 | 0.05301  | 0.041739 | 0.053439 | 6.910858 | 3.337454 | 1862.979 | 1.63E-61 | 4.11E-59 |
| LOC114319519 | 12.43497 | 12.73717 | 12.88973 | 5.509706 | 6.061801 | 5.430316 | 1.054847 | 4.34354  | 304.9721 | 1.64E-30 | 4.03E-29 |
| LOC114319559 | 1.594967 | 1.744617 | 1.464553 | 0.745551 | 0.619634 | 0.720269 | 1.102173 | 1.639908 | 54.39005 | 8.12E-11 | 4.01E-10 |

|              |          |          |          |          |          |          |          |          |          |          |          |
|--------------|----------|----------|----------|----------|----------|----------|----------|----------|----------|----------|----------|
| LOC114319560 | 6.776049 | 5.969209 | 6.021795 | 1.412907 | 1.283625 | 1.588688 | 2.022027 | 2.546497 | 280.3078 | 2.95E-29 | 6.61E-28 |
| LOC114319563 | 2.58186  | 2.269981 | 1.981872 | 4.629068 | 4.606587 | 3.742946 | -1.01621 | 1.524135 | 45.85116 | 1.32E-09 | 5.81E-09 |
| LOC114319565 | 1.813011 | 1.372696 | 1.545541 | 3.523021 | 3.400275 | 4.768793 | -1.41257 | 1.434125 | 79.2992  | 5.86E-14 | 3.83E-13 |
| LOC114319591 | 2.072578 | 1.907561 | 2.039605 | 0        | 0        | 0        | 9.429934 | 0.845564 | 298.1117 | 7.34E-30 | 1.72E-28 |
| LOC114319608 | 0.761451 | 1.054171 | 0.91893  | 0        | 0        | 0        | 8.814019 | 0.288951 | 185.0064 | 2.93E-23 | 4.17E-22 |
| LOC114319642 | 0.748658 | 0.716539 | 1.110486 | 1.29288  | 2.67887  | 1.903568 | -1.32554 | 0.256525 | 29.28151 | 6.29E-07 | 2.1E-06  |
| LOC114319638 | 37.75579 | 39.13707 | 38.91554 | 0.184746 | 0.145463 | 0.209522 | 7.578894 | 3.500715 | 2176.644 | 2.13E-64 | 6.97E-62 |
| LOC114319643 | 0.761009 | 0.843073 | 1.051933 | 0        | 0.070273 | 0.05061  | 4.181518 | 0.327892 | 134.5158 | 2.2E-19  | 2.25E-18 |
| LOC114319656 | 0.76227  | 0.885137 | 0.994576 | 2.511528 | 2.011588 | 1.898891 | -1.37114 | 0.968306 | 55.48893 | 5.75E-11 | 2.88E-10 |
| LOC114319657 | 1.861941 | 1.976051 | 1.881189 | 0.466852 | 0.551375 | 0.558873 | 1.732853 | 0.857944 | 70.61683 | 6.38E-13 | 3.8E-12  |
| LOC114319658 | 0.012514 | 0        | 0.01375  | 1.137402 | 1.271685 | 1.496323 | -7.01233 | 0.682688 | 337.4555 | 4.76E-32 | 1.31E-30 |
| LOC114319660 | 0.324374 | 0.290322 | 0.383819 | 0.89204  | 0.761885 | 1.017382 | -1.52344 | 1.182117 | 78.55    | 7.16E-14 | 4.63E-13 |
| LOC114319652 | 0.095208 | 0.142939 | 0.139479 | 1.874947 | 1.907796 | 1.592063 | -3.91648 | 0.886104 | 266.0629 | 1.71E-28 | 3.61E-27 |
| LOC114319662 | 4.576231 | 4.368701 | 4.24109  | 1.826513 | 1.865304 | 1.736469 | 1.17675  | 3.232017 | 199.0084 | 1.99E-24 | 3.07E-23 |
| LOC114319673 | 1.780146 | 1.365344 | 1.644107 | 0.656577 | 0.590819 | 0.67371  | 1.214237 | 0.486759 | 28.74573 | 6.43E-07 | 2.15E-06 |
| LOC114319670 | 0.474128 | 0.474549 | 0.376238 | 1.197056 | 0.86712  | 1.520498 | -1.53477 | -0.02208 | 33.18798 | 1.18E-07 | 4.28E-07 |
| LOC114319705 | 0.975437 | 0.777286 | 0.725494 | 0.081839 | 0.171832 | 0.061876 | 2.833567 | 0.069363 | 75.679   | 1.56E-13 | 9.82E-13 |
| LOC114319730 | 1.829189 | 1.897058 | 2.24781  | 0.568774 | 0.516731 | 0.330794 | 1.987252 | 0.71534  | 76.25742 | 1.33E-13 | 8.44E-13 |
| LOC114319731 | 2.277909 | 2.418354 | 2.312142 | 6.42815  | 7.172776 | 6.082616 | -1.59625 | 2.654022 | 226.7966 | 3.22E-26 | 5.76E-25 |
| LOC114319758 | 0.452628 | 0.390377 | 0.253951 | 0.035013 | 0.165407 | 0.158832 | 1.424445 | -0.21015 | 19.89611 | 2.74E-05 | 7.48E-05 |
| LOC114319787 | 6.626867 | 7.148972 | 7.174363 | 3.055811 | 2.883274 | 2.883234 | 1.143932 | 3.425293 | 220.8771 | 7.52E-26 | 1.3E-24  |
| LOC114319789 | 1.703832 | 2.192584 | 1.711608 | 0.530959 | 1.045149 | 0.535256 | 1.268897 | -0.16331 | 18.1471  | 5.06E-05 | 0.000133 |
| LOC114319791 | 3.057021 | 2.573453 | 2.799063 | 1.243736 | 1.333482 | 1.140426 | 1.078401 | 2.090424 | 69.75203 | 8.16E-13 | 4.82E-12 |
| LOC114319792 | 0.314422 | 0.315764 | 0.40149  | 0.108133 | 0.218933 | 0.046718 | 1.345638 | -0.10962 | 19.36188 | 3.4E-05  | 9.15E-05 |
| LOC114319803 | 1.883343 | 1.45794  | 1.784778 | 3.808734 | 2.661918 | 3.300294 | -1.01522 | 1.694805 | 50.11486 | 3.2E-10  | 1.5E-09  |
| LOC114319859 | 37.66686 | 36.85435 | 37.65883 | 16.03342 | 15.70488 | 14.69477 | 1.169194 | 5.074447 | 645.1719 | 1.4E-42  | 8.53E-41 |

|              |          |          |          |          |          |          |          |          |          |          |          |
|--------------|----------|----------|----------|----------|----------|----------|----------|----------|----------|----------|----------|
| LOC114319870 | 1.343531 | 1.03427  | 1.17493  | 0.373821 | 0.235468 | 0.32032  | 1.847973 | 0.800287 | 72.81744 | 3.44E-13 | 2.1E-12  |
| LOC114319868 | 3.361043 | 3.741027 | 4.074944 | 0.210682 | 0.608241 | 0.265484 | 3.197896 | 0.77114  | 148.765  | 1.06E-20 | 1.2E-19  |
| LOC114319889 | 0.808565 | 0.812895 | 0.729761 | 0        | 0        | 0        | 8.395182 | -0.08984 | 140.9172 | 6.77E-20 | 7.2E-19  |
| LOC114319914 | 1.122489 | 1.068314 | 1.152572 | 0.449392 | 0.468594 | 0.376504 | 1.267763 | 1.832309 | 80.31795 | 4.46E-14 | 2.95E-13 |
| LOC114319915 | 7.708567 | 8.841691 | 7.97615  | 1.894504 | 1.826009 | 1.753427 | 2.059157 | 3.064488 | 433.3868 | 5.53E-36 | 2.07E-34 |
| LOC114319968 | 0.603598 | 0.731931 | 0.918275 | 1.688052 | 1.794306 | 1.659171 | -1.29638 | -0.23079 | 21.38287 | 1.27E-05 | 3.61E-05 |
| LOC114319929 | 0.760563 | 0.513835 | 0.584963 | 0.193559 | 0.13063  | 0.125438 | 1.970478 | -0.20933 | 37.14145 | 2.75E-08 | 1.07E-07 |
| LOC114319989 | 1.817856 | 1.76261  | 2.219283 | 5.048599 | 4.46295  | 4.563161 | -1.37918 | 3.005881 | 224.8261 | 4.27E-26 | 7.53E-25 |
| LOC114320016 | 16.46551 | 13.5001  | 18.35481 | 32.83732 | 28.02865 | 30.375   | -1.0168  | 4.149997 | 192.4783 | 3.48E-15 | 2.53E-14 |
| LOC114320035 | 0.848831 | 0.75666  | 0.88407  | 0.385756 | 0.354353 | 0.303811 | 1.159676 | 1.066905 | 40.38512 | 8.64E-09 | 3.53E-08 |
| LOC114320073 | 2.25408  | 1.692059 | 1.520751 | 0        | 0.169802 | 0        | 4.696885 | -0.25834 | 90.77616 | 5.16E-15 | 3.69E-14 |
| LOC114320101 | 13.69367 | 12.41045 | 13.21095 | 5.05948  | 6.426979 | 6.120511 | 1.040625 | 2.950919 | 120.2423 | 3.28E-18 | 3.05E-17 |
| LOC114320123 | 0.12311  | 0.095969 | 0.145671 | 0.344295 | 0.393075 | 0.416497 | -1.76369 | -0.22761 | 37.87614 | 2.11E-08 | 8.29E-08 |
| LOC114320133 | 5.577407 | 3.88148  | 5.745121 | 2.60509  | 2.383781 | 2.12933  | 1.003173 | 1.571708 | 41.04985 | 7.41E-09 | 3.05E-08 |
| LOC114320144 | 75.15853 | 78.43409 | 74.95706 | 2.866254 | 2.357094 | 2.744978 | 4.741168 | 5.044482 | 5227.813 | 6.6E-81  | 8.75E-78 |
| LOC114320160 | 1.595739 | 1.46251  | 1.325172 | 0.303569 | 0.451482 | 0.331528 | 1.886621 | 0.664968 | 68.90523 | 1.04E-12 | 6.07E-12 |
| LOC114320169 | 8.538715 | 7.848632 | 7.761744 | 0.462975 | 0.191859 | 0.331618 | 4.544604 | 3.22023  | 1242.209 | 5.96E-53 | 8E-51    |
| LOC114320170 | 8.390583 | 7.661179 | 8.199666 | 0.07333  | 0.019246 | 0.055442 | 7.24274  | 3.171956 | 1597.966 | 1.09E-58 | 2.29E-56 |
| LOC114320194 | 4.944297 | 4.551618 | 4.624971 | 2.095141 | 1.57792  | 1.744775 | 1.292057 | 2.564286 | 131.5612 | 3.08E-19 | 3.11E-18 |
| LOC114320195 | 2.438338 | 2.479202 | 2.499164 | 11.80887 | 12.03259 | 13.17992 | -2.42807 | 3.648312 | 1039.023 | 6.74E-51 | 7.73E-49 |
| LOC114320204 | 17.85608 | 18.57796 | 18.24659 | 4.307007 | 3.267877 | 3.670848 | 2.188991 | 3.924704 | 888.3763 | 4.02E-48 | 3.53E-46 |
| LOC114320225 | 3.223996 | 3.140245 | 3.531473 | 0.305617 | 0.49542  | 0.516504 | 2.765258 | 2.516688 | 419.8835 | 1.78E-35 | 6.36E-34 |
| LOC114320209 | 6.97161  | 6.714684 | 7.628346 | 0        | 0        | 0        | 10.57451 | 1.921323 | 653.8635 | 2.92E-42 | 1.73E-40 |
| LOC114320234 | 1.278913 | 1.326791 | 1.626237 | 0.44407  | 0.431915 | 0.276498 | 1.783644 | 0.983039 | 77.01021 | 1.09E-13 | 6.92E-13 |
| LOC114320235 | 1.246242 | 1.290182 | 1.324156 | 0.033193 | 0.013068 | 0.056467 | 5.08149  | 2.142391 | 599.6909 | 2.43E-41 | 1.35E-39 |
| LOC114320239 | 8.54379  | 7.805684 | 7.785374 | 2.929516 | 2.929019 | 3.691531 | 1.222795 | 2.733126 | 136.4071 | 1.16E-19 | 1.22E-18 |

|              |          |          |          |          |          |          |          |          |          |          |          |
|--------------|----------|----------|----------|----------|----------|----------|----------|----------|----------|----------|----------|
| LOC114320303 | 0.478309 | 0.633618 | 0.772851 | 1.483232 | 1.32893  | 1.314776 | -1.23236 | 0.166384 | 25.80196 | 2.06E-06 | 6.5E-06  |
| LOC114320491 | 4.25503  | 4.552449 | 4.225963 | 2.064471 | 1.733862 | 1.498449 | 1.209671 | 2.613457 | 119.007  | 4.28E-18 | 3.93E-17 |
| LOC114320538 | 0.651535 | 0.886466 | 0.775524 | 2.862237 | 2.001068 | 2.499852 | -1.76694 | 1.864214 | 152.0329 | 8.63E-21 | 9.86E-20 |
| LOC114320621 | 11.49296 | 12.02649 | 11.84693 | 5.278406 | 5.289505 | 5.776954 | 1.003156 | 3.673049 | 206.0384 | 6.75E-25 | 1.09E-23 |
| LOC114320606 | 2.317961 | 2.132128 | 2.206066 | 0        | 0.023364 | 0        | 7.591716 | 1.116834 | 351.6873 | 1.1E-32  | 3.16E-31 |
| LOC114320630 | 0.25046  | 0.334896 | 0.206393 | 0.483748 | 0.716963 | 0.817552 | -1.48299 | -0.06079 | 30.22555 | 3.63E-07 | 1.24E-06 |
| LOC114320662 | 0.119815 | 0.053965 | 0.118481 | 0.958331 | 0.943197 | 0.872771 | -3.30808 | 0.391831 | 154.2852 | 3.8E-21  | 4.48E-20 |
| LOC114320652 | 2.854293 | 3.140326 | 2.537632 | 0.435684 | 0.249486 | 0.149731 | 3.302032 | 1.177465 | 204.4124 | 8.65E-25 | 1.38E-23 |
| LOC114320654 | 0.898018 | 0.898814 | 0.840513 | 3.385793 | 3.332325 | 2.788458 | -1.94048 | 0.90785  | 101.3549 | 2.3E-16  | 1.83E-15 |
| LOC114320691 | 19.60533 | 18.23798 | 18.31557 | 7.391562 | 7.872518 | 7.304518 | 1.208871 | 4.537688 | 439.1809 | 3.38E-36 | 1.29E-34 |
| LOC114320698 | 1.326901 | 1.59048  | 1.787129 | 0.622469 | 0.490111 | 0.47063  | 1.468894 | -0.26534 | 22.28395 | 8.69E-06 | 2.53E-05 |
| LOC114320768 | 1.619882 | 1.720348 | 1.678705 | 0.83655  | 0.658671 | 0.708389 | 1.092206 | 1.04072  | 35.71686 | 4.62E-08 | 1.75E-07 |
| LOC114320778 | 0.057343 | 0        | 0.031502 | 1.511457 | 1.231108 | 1.379202 | -5.38029 | -0.40031 | 134.9699 | 1.55E-19 | 1.61E-18 |
| LOC114320792 | 406.417  | 395.1572 | 401.4853 | 53.98977 | 48.88275 | 54.68032 | 2.828036 | 8.110152 | 8638.08  | 4.38E-87 | 1.07E-83 |
| LOC114320806 | 0.093293 | 0.157571 | 0.205009 | 2.883016 | 1.869403 | 2.05154  | -3.92912 | -0.32347 | 108.8128 | 4.08E-17 | 3.45E-16 |
| LOC114320821 | 140.1552 | 139.1315 | 140.8781 | 23.60323 | 24.73668 | 25.4676  | 2.402371 | 6.765563 | 4884.326 | 1.29E-79 | 1.58E-76 |
| LOC114320854 | 3.31542  | 2.737648 | 3.56184  | 0.669649 | 0.421807 | 0.607562 | 2.392424 | -0.18858 | 51.15252 | 2.29E-10 | 1.09E-09 |
| LOC114320891 | 31.03151 | 30.72821 | 33.0541  | 15.87091 | 13.85295 | 14.33085 | 1.006781 | 3.799647 | 224.1887 | 4.67E-26 | 8.21E-25 |
| LOC114320897 | 0.259409 | 0.315777 | 0.2311   | 0.012745 | 0.030105 | 0.019272 | 3.486322 | -0.44609 | 64.95547 | 3.26E-12 | 1.83E-11 |
| LOC114320869 | 1.193743 | 1.15213  | 1.011818 | 2.542014 | 2.977836 | 2.976663 | -1.44981 | 1.834468 | 112.4279 | 1.81E-17 | 1.58E-16 |
| LOC114320962 | 1.922642 | 1.960656 | 2.046057 | 0.549532 | 0.553834 | 0.747871 | 1.555606 | 1.727861 | 106.9877 | 6.19E-17 | 5.15E-16 |
| LOC114320963 | 16.59464 | 16.12085 | 16.33684 | 1.594457 | 1.417412 | 1.691617 | 3.27574  | 4.226881 | 1902.409 | 6.68E-62 | 1.76E-59 |
| LOC114320964 | 1.861907 | 1.903404 | 1.830412 | 6.457487 | 7.188301 | 7.811696 | -2.05069 | 2.50056  | 313.0892 | 6.59E-31 | 1.68E-29 |
| LOC114320965 | 4.748022 | 4.73753  | 4.519549 | 10.04108 | 11.00113 | 12.0499  | -1.35328 | 3.354826 | 301.0637 | 2.56E-30 | 6.21E-29 |
| LOC114320947 | 3.177815 | 2.919068 | 2.695268 | 10.08389 | 8.378594 | 10.30597 | -1.80798 | 2.78421  | 307.9816 | 1.17E-30 | 2.91E-29 |
| LOC114320997 | 0.827809 | 0.889742 | 0.978453 | 0.171001 | 0.206449 | 0.293054 | 1.865696 | 1.478507 | 118.8928 | 4.38E-18 | 4.03E-17 |

|              |          |          |          |          |          |          |          |          |          |          |          |
|--------------|----------|----------|----------|----------|----------|----------|----------|----------|----------|----------|----------|
| LOC114321001 | 1.15376  | 0.917034 | 1.00669  | 2.035643 | 2.137063 | 2.052117 | -1.11349 | 0.518307 | 28.23071 | 7.87E-07 | 2.6E-06  |
| LOC114321039 | 25.45943 | 26.51423 | 25.79461 | 10.70657 | 11.26815 | 11.12848 | 1.125253 | 5.544063 | 769.319  | 1.32E-45 | 9.71E-44 |
| LOC114321076 | 3.307334 | 3.342097 | 3.292257 | 6.371844 | 7.525464 | 7.265188 | -1.20246 | 2.492158 | 119.3236 | 3.99E-18 | 3.69E-17 |
| LOC114321063 | 2.289554 | 1.829572 | 1.947584 | 8.055485 | 7.505432 | 6.395034 | -1.93774 | 0.961583 | 104.0654 | 1.22E-16 | 9.9E-16  |
| LOC114321117 | 2.517893 | 2.225434 | 2.290554 | 5.16767  | 4.998873 | 4.614121 | -1.16789 | 2.043021 | 85.83289 | 1.05E-14 | 7.31E-14 |
| LOC114321176 | 8.063891 | 8.501424 | 8.099291 | 0.893329 | 0.703377 | 0.583316 | 3.415491 | 2.596592 | 596.6788 | 2.96E-41 | 1.62E-39 |
| LOC114321136 | 1.920495 | 1.596111 | 1.833802 | 0.124683 | 0.065447 | 0.031423 | 4.513658 | 0.425166 | 163.1718 | 7.62E-22 | 9.52E-21 |
| LOC114321181 | 0.433402 | 0.393119 | 0.595246 | 1.094233 | 1.24065  | 1.389892 | -1.50579 | 1.140668 | 73.96987 | 2.5E-13  | 1.55E-12 |
| LOC114321188 | 5.143806 | 4.639294 | 4.59729  | 2.51208  | 2.014556 | 1.93448  | 1.06706  | 3.034944 | 131.8605 | 2.9E-19  | 2.94E-18 |
| LOC114321207 | 0.265801 | 0.346548 | 0.215193 | 0.584902 | 0.580671 | 0.499908 | -1.10558 | -0.07638 | 17.49264 | 6.74E-05 | 0.000174 |
| LOC114321223 | 1.254629 | 1.261347 | 1.52621  | 0.407266 | 0.673402 | 0.369506 | 1.353145 | 0.41034  | 31.75579 | 2.02E-07 | 7.13E-07 |
| LOC114321251 | 0.338973 | 0.473813 | 0.539401 | 1.593599 | 1.589345 | 1.429781 | -1.87836 | 1.386952 | 129.1001 | 5.1E-19  | 5.05E-18 |
| LOC114321262 | 0.148441 | 0.111429 | 0.326196 | 1.798926 | 1.770518 | 1.768148 | -3.24578 | -0.6542  | 69.35634 | 9.13E-13 | 5.36E-12 |
| LOC114321288 | 4.188733 | 4.030467 | 4.211834 | 2.076646 | 1.853092 | 1.639871 | 1.064767 | 1.861241 | 59.54026 | 1.64E-11 | 8.65E-11 |
| LOC114321291 | 3.185213 | 3.057592 | 2.85769  | 0.770631 | 1.279135 | 1.275533 | 1.316383 | 2.460208 | 116.822  | 2.6E-17  | 2.23E-16 |
| LOC114321265 | 0.946893 | 0.815329 | 1.22399  | 2.025039 | 2.232227 | 2.066945 | -1.18502 | -0.16127 | 19.04144 | 3.43E-05 | 9.23E-05 |
| LOC114321317 | 0.680342 | 0.95758  | 0.882489 | 0.068708 | 0.162295 | 0.168831 | 2.475398 | 0.732379 | 102.1406 | 2.3E-16  | 1.83E-15 |
| LOC114321381 | 0        | 0        | 0        | 4.746249 | 6.15512  | 6.332639 | -10.2967 | 1.523843 | 634.7724 | 3.49E-41 | 1.92E-39 |
| LOC114321357 | 0.85275  | 0.707512 | 0.808737 | 0        | 0.064239 | 0.012337 | 4.687944 | 0.575045 | 177.4357 | 1.07E-22 | 1.44E-21 |
| LOC114321398 | 1.107206 | 0.912068 | 1.082075 | 0.413134 | 0.408695 | 0.408468 | 1.229733 | 1.927969 | 80.451   | 4.31E-14 | 2.85E-13 |
| LOC114321371 | 13.6692  | 13.77133 | 13.20298 | 4.13547  | 3.979714 | 3.91506  | 1.652416 | 5.742685 | 1745.588 | 2.59E-60 | 6.09E-58 |
| LOC114321487 | 2.988736 | 3.484085 | 3.206582 | 7.734018 | 7.247016 | 7.29724  | -1.30666 | 2.215951 | 118.4326 | 4.84E-18 | 4.42E-17 |
| LOC114321488 | 3.099445 | 3.150665 | 3.121698 | 6.690656 | 6.500278 | 6.212319 | -1.15203 | 2.76999  | 139.7222 | 6.05E-20 | 6.45E-19 |
| LOC114321489 | 0.704167 | 0.628844 | 0.613622 | 2.118703 | 1.911474 | 1.735378 | -1.65139 | 0.71233  | 66.91957 | 1.84E-12 | 1.05E-11 |
| LOC114321491 | 26.79426 | 26.41032 | 27.98124 | 10.38502 | 11.45905 | 13.21535 | 1.09383  | 3.852393 | 260.4676 | 3.48E-28 | 7.15E-27 |
| LOC114321557 | 1.922028 | 1.65066  | 1.77774  | 0.059219 | 0.077711 | 0.074622 | 4.508049 | 1.418839 | 351.093  | 1.17E-32 | 3.34E-31 |

|              |          |          |          |          |          |          |          |          |          |          |          |
|--------------|----------|----------|----------|----------|----------|----------|----------|----------|----------|----------|----------|
| LOC114321560 | 2.063183 | 1.80612  | 1.849848 | 0.089033 | 0.061339 | 0.100972 | 4.391931 | 2.304144 | 620.9107 | 6.28E-42 | 3.65E-40 |
| LOC114321586 | 21.45566 | 20.49699 | 21.71132 | 4.230881 | 4.191644 | 4.025032 | 2.250248 | 4.607901 | 1396.407 | 3.16E-56 | 5.46E-54 |
| LOC114321578 | 13.01953 | 13.04562 | 11.87834 | 2.324455 | 2.606645 | 2.29001  | 2.2852   | 4.114683 | 1029.111 | 9.99E-51 | 1.12E-48 |
| LOC114321640 | 1.243293 | 1.14206  | 1.150364 | 0.237904 | 0.140488 | 0.269808 | 2.323701 | -0.42085 | 40.98792 | 6.99E-09 | 2.88E-08 |
| LOC114321608 | 48.44459 | 48.16029 | 48.26362 | 12.10412 | 13.42032 | 14.89462 | 1.72804  | 4.75544  | 931.4511 | 5.88E-49 | 5.63E-47 |
| LOC114321610 | 1.097139 | 0.979781 | 1.24704  | 0.171931 | 0.243671 | 0.233986 | 2.21225  | 0.217991 | 63.00355 | 5.8E-12  | 3.17E-11 |
| LOC114321617 | 0.321939 | 0.338336 | 0.2594   | 2.887123 | 3.041204 | 3.303797 | -3.42367 | 1.275604 | 305.809  | 1.49E-30 | 3.68E-29 |
| LOC114321632 | 1.6763   | 1.527984 | 1.359439 | 0.145105 | 0.057126 | 0.164565 | 3.484679 | -0.4495  | 65.36326 | 2.89E-12 | 1.63E-11 |
| LOC114321719 | 5.83613  | 5.337643 | 5.941285 | 1.342369 | 0.988747 | 0.982185 | 2.284017 | 2.126016 | 255.2356 | 6.82E-28 | 1.37E-26 |
| LOC114321787 | 55.90502 | 55.5741  | 55.3281  | 23.03605 | 21.74628 | 24.4386  | 1.163757 | 6.454729 | 1140.403 | 2.62E-44 | 1.79E-42 |
| LOC114321822 | 1.458434 | 1.28849  | 1.50383  | 0.774958 | 0.224802 | 0.524246 | 1.424536 | 0.468179 | 34.29199 | 8.94E-08 | 3.29E-07 |
| LOC114321811 | 6.105478 | 5.860966 | 7.048398 | 2.352713 | 2.69813  | 3.557631 | 1.015732 | 2.319537 | 68.43517 | 1.38E-12 | 7.94E-12 |
| LOC114321814 | 0.119789 | 0.104908 | 0.07312  | 0.725848 | 0.628659 | 0.548791 | -2.73061 | -0.21711 | 76.47533 | 1.26E-13 | 7.97E-13 |
| LOC114321866 | 0.418993 | 0.484536 | 0.348384 | 1.029262 | 1.11836  | 1.027215 | -1.44779 | 1.012546 | 64.40218 | 3.83E-12 | 2.13E-11 |
| LOC114321851 | 0.603964 | 0.340031 | 0.5451   | 1.097899 | 0.987941 | 1.274778 | -1.26631 | 0.241546 | 28.44898 | 7.22E-07 | 2.4E-06  |
| LOC114321862 | 2.695169 | 2.781858 | 2.899601 | 0.612417 | 0.83045  | 0.92606  | 1.68638  | 1.571113 | 110.3328 | 2.9E-17  | 2.48E-16 |
| LOC114321914 | 1.001742 | 0.975533 | 0.981666 | 0.147648 | 0.116253 | 0.074421 | 3.018088 | -0.47488 | 55.21281 | 6.27E-11 | 3.13E-10 |
| LOC114321957 | 1.347286 | 1.456088 | 1.394408 | 0.481078 | 0.318524 | 0.380262 | 1.744331 | 2.184871 | 170.1535 | 2.24E-22 | 2.92E-21 |
| LOC114321986 | 3.698426 | 3.968776 | 4.363614 | 0        | 0        | 0        | 9.962794 | 1.344036 | 428.7959 | 2.12E-35 | 7.51E-34 |
| LOC114321965 | 77.24301 | 72.5808  | 73.10413 | 165.3882 | 165.8062 | 169.2557 | -1.27195 | 6.472763 | 1430.25  | 1.02E-52 | 1.33E-50 |
| LOC114321993 | 1.312936 | 1.478363 | 1.583317 | 0.232847 | 0.091668 | 0.132037 | 3.169619 | -0.20581 | 71.45828 | 5.03E-13 | 3.03E-12 |
| LOC114322077 | 1.7358   | 2.071777 | 2.250491 | 4.038879 | 4.521673 | 4.055661 | -1.17068 | 1.467385 | 59.08116 | 1.89E-11 | 9.91E-11 |
| LOC114322094 | 4.924696 | 4.681601 | 4.679158 | 1.577645 | 1.964385 | 1.747605 | 1.317336 | 2.301887 | 116.3517 | 7.61E-18 | 6.86E-17 |
| LOC114322102 | 2.503673 | 1.862639 | 2.210536 | 1.056535 | 1.023853 | 0.614473 | 1.206475 | 0.182388 | 21.95149 | 9.98E-06 | 2.88E-05 |
| LOC114322139 | 4.288766 | 4.134755 | 4.188664 | 17.07014 | 17.37229 | 20.26468 | -2.22608 | 3.622687 | 855.0202 | 1.89E-47 | 1.6E-45  |
| LOC114322141 | 5.95662  | 7.162376 | 7.077846 | 1.665857 | 2.237503 | 1.741079 | 1.718333 | 2.284455 | 172.8034 | 1.42E-22 | 1.89E-21 |



|              |          |          |          |          |          |          |          |          |          |          |          |
|--------------|----------|----------|----------|----------|----------|----------|----------|----------|----------|----------|----------|
| LOC114322142 | 18.56285 | 17.57008 | 18.59917 | 41.89685 | 41.25751 | 41.07301 | -1.28768 | 5.872204 | 1245.992 | 3.69E-54 | 5.33E-52 |
| LOC114322166 | 0.242686 | 0.273264 | 0.28887  | 0.919082 | 0.694708 | 0.750481 | -1.63552 | -0.26911 | 31.92858 | 1.89E-07 | 6.71E-07 |
| LOC114322167 | 2.767714 | 2.804796 | 2.166715 | 5.911672 | 6.73439  | 5.753468 | -1.35356 | 1.952953 | 103.5346 | 1.38E-16 | 1.12E-15 |
| LOC114322168 | 0.826519 | 0.465329 | 0.756775 | 1.502463 | 1.429445 | 1.183299 | -1.082   | -0.07078 | 16.72056 | 9.47E-05 | 0.000239 |
| LOC114322171 | 2.756026 | 2.612454 | 2.672815 | 0.332293 | 0.362266 | 0.328541 | 2.860029 | 1.731657 | 277.0205 | 4.39E-29 | 9.73E-28 |
| LOC114322205 | 1.832072 | 1.724223 | 1.562308 | 0.049707 | 0.078276 | 0.150328 | 3.980078 | 0.151771 | 119.9612 | 3.48E-18 | 3.23E-17 |
| LOC114322210 | 1.619113 | 1.681319 | 1.897586 | 5.13435  | 5.355821 | 4.796776 | -1.66152 | 2.542005 | 224.2806 | 4.61E-26 | 8.11E-25 |
| LOC114322214 | 2.617113 | 2.175722 | 2.633664 | 0.889242 | 0.385088 | 0.638712 | 1.888816 | 1.00841  | 84.60045 | 1.45E-14 | 9.96E-14 |
| LOC114322277 | 4.364074 | 4.177555 | 4.670624 | 2.286198 | 1.818076 | 2.022374 | 1.013416 | 2.953158 | 114.899  | 1.05E-17 | 9.3E-17  |
| LOC114322307 | 0.664809 | 0.916621 | 0.849711 | 0.197307 | 0.252448 | 0.205119 | 1.760437 | 0.314775 | 46.58813 | 1.03E-09 | 4.58E-09 |
| LOC114322295 | 4.62375  | 4.513474 | 5.292791 | 2.428865 | 1.207836 | 1.933044 | 1.29393  | 2.523364 | 95.39879 | 4.52E-12 | 2.49E-11 |
| LOC114322327 | 5.611782 | 5.023806 | 5.174014 | 2.327424 | 2.292222 | 2.415852 | 1.06229  | 4.712109 | 380.0659 | 6.76E-34 | 2.13E-32 |
| LOC114322371 | 1.274026 | 1.933525 | 1.764998 | 0.352427 | 0.237848 | 0.076131 | 2.837353 | 0.175225 | 77.79373 | 1.37E-13 | 8.65E-13 |
| LOC114322359 | 10.92035 | 10.79533 | 10.15378 | 5.149206 | 4.769779 | 4.597803 | 1.034383 | 4.175577 | 270.257  | 1.01E-28 | 2.17E-27 |
| LOC114322364 | 2.222375 | 1.964241 | 1.995462 | 4.821793 | 4.104343 | 5.156405 | -1.28761 | 2.116261 | 106.4475 | 7.01E-17 | 5.81E-16 |
| LOC114322407 | 13.45029 | 13.9186  | 12.38498 | 5.90828  | 5.889211 | 6.225387 | 1.034001 | 4.061714 | 255.3218 | 6.75E-28 | 1.36E-26 |
| LOC114322444 | 2.984921 | 3.174291 | 2.654961 | 0.473703 | 0.406885 | 0.455831 | 2.61232  | 1.172277 | 162.0071 | 9.37E-22 | 1.16E-20 |
| LOC114322457 | 3.520087 | 2.003583 | 2.422604 | 1.546984 | 1.107312 | 0.744309 | 1.173816 | 0.644211 | 25.8344  | 3.45E-06 | 1.06E-05 |
| LOC114322488 | 1.302251 | 0.682015 | 0.765332 | 2.477365 | 2.557446 | 2.705533 | -1.57855 | 0.841153 | 63.89504 | 4.45E-12 | 2.46E-11 |
| LOC114322505 | 0.871563 | 1.163115 | 1.010824 | 2.347179 | 2.795237 | 2.085192 | -1.35761 | 1.707137 | 86.82598 | 8.59E-15 | 6.03E-14 |
| LOC114322511 | 1.219371 | 1.166117 | 1.082831 | 2.611335 | 2.24734  | 2.180969 | -1.11253 | 1.687824 | 62.32829 | 7.09E-12 | 3.86E-11 |
| LOC114322515 | 0.933744 | 1.033162 | 1.13862  | 0.245286 | 0.231756 | 0.215126 | 2.060827 | 1.851122 | 182.0384 | 3.01E-23 | 4.27E-22 |
| LOC114322517 | 0.361454 | 0.35716  | 0.218835 | 0.147503 | 0.05279  | 0.060831 | 1.811023 | -0.13104 | 31.99238 | 2.18E-07 | 7.65E-07 |
| LOC114322529 | 1.99986  | 1.64117  | 1.93663  | 0.985868 | 0.48515  | 0.885145 | 1.160157 | 0.340896 | 22.97856 | 6.51E-06 | 1.93E-05 |
| LOC114322579 | 0.040956 | 0.069175 | 0.09     | 0.465319 | 0.410341 | 0.436248 | -2.79935 | -0.36904 | 70.82173 | 6.02E-13 | 3.6E-12  |
| LOC114322576 | 1.213069 | 1.232948 | 1.238488 | 0.175631 | 0.107556 | 0.118035 | 3.113078 | 1.012336 | 181.1302 | 3.5E-23  | 4.92E-22 |

|              |          |          |          |          |          |          |          |          |          |          |          |
|--------------|----------|----------|----------|----------|----------|----------|----------|----------|----------|----------|----------|
| LOC114322584 | 4.53959  | 4.274329 | 5.303161 | 1.991902 | 2.109813 | 2.008022 | 1.099289 | 2.964876 | 132.1813 | 2.72E-19 | 2.76E-18 |
| LOC114322590 | 1.031184 | 0.935339 | 0.818281 | 0.468627 | 0.286985 | 0.255894 | 1.399156 | 0.510028 | 36.17498 | 3.91E-08 | 1.49E-07 |
| LOC114322612 | 2.698521 | 2.707407 | 2.223734 | 1.037687 | 1.039869 | 0.618141 | 1.41513  | 1.622612 | 78.28878 | 1.12E-13 | 7.13E-13 |
| LOC114322618 | 1.92012  | 1.743589 | 1.531245 | 4.616381 | 4.742949 | 4.852377 | -1.55326 | 1.684201 | 117.1096 | 6.45E-18 | 5.84E-17 |
| LOC114322647 | 0.084803 | 0.079574 | 0.077648 | 2.492213 | 2.852393 | 2.525333 | -5.09114 | 1.553738 | 538.2957 | 1.57E-39 | 7.65E-38 |
| LOC114322666 | 0.052589 | 0.177645 | 0.144454 | 3.345908 | 3.462428 | 3.505497 | -4.87488 | 1.052163 | 360.8449 | 4.38E-33 | 1.3E-31  |
| LOC114322702 | 0        | 0.058299 | 0        | 4.988311 | 5.409753 | 7.044898 | -7.87993 | 0.788362 | 365.0771 | 2.88E-33 | 8.66E-32 |
| LOC114322715 | 0.946922 | 0.928653 | 0.83905  | 0.166581 | 0.2186   | 0.272884 | 1.899605 | 0.2815   | 52.55784 | 1.45E-10 | 7.04E-10 |
| LOC114322716 | 2.836949 | 2.764383 | 3.196999 | 0.264465 | 0.182202 | 0.099977 | 3.939576 | 1.420746 | 302.9486 | 2.06E-30 | 5.03E-29 |
| LOC114322741 | 11.39067 | 11.60991 | 11.96277 | 4.544607 | 3.726483 | 3.903666 | 1.426131 | 3.988678 | 447.7553 | 1.65E-36 | 6.44E-35 |
| LOC114322772 | 1.017701 | 1.020593 | 1.153134 | 0.115625 | 0.113799 | 0.152986 | 2.916927 | 0.311916 | 99.18206 | 3.85E-16 | 3.01E-15 |
| LOC114322773 | 1.279089 | 1.193722 | 1.569983 | 0.502736 | 0.445317 | 0.649344 | 1.220753 | 1.347281 | 52.0309  | 1.72E-10 | 8.29E-10 |
| LOC114322793 | 1.973343 | 1.741552 | 3.164392 | 0.290853 | 0.229008 | 0.219905 | 3.08803  | -0.27472 | 62.40445 | 6.93E-12 | 3.77E-11 |
| LOC114322814 | 0.497047 | 0.524694 | 0.477861 | 1.1859   | 1.20052  | 1.323587 | -1.40974 | -0.16179 | 26.7491  | 1.41E-06 | 4.54E-06 |
| LOC114322815 | 0.289127 | 0.434076 | 0.317676 | 1.518347 | 1.333438 | 1.5012   | -2.15938 | -0.18129 | 55.15642 | 6.38E-11 | 3.18E-10 |
| LOC114322843 | 0.667778 | 0.704922 | 0.733716 | 0        | 0.089605 | 0.028681 | 3.851346 | -0.62793 | 60.6728  | 1.17E-11 | 6.22E-11 |
| LOC114322862 | 2.182012 | 2.134537 | 2.299833 | 3.94856  | 3.956863 | 4.6952   | -1.04097 | 3.309511 | 175.3186 | 9.26E-23 | 1.25E-21 |
| LOC114322877 | 5.879267 | 6.073432 | 6.10421  | 1.078551 | 1.56976  | 1.11199  | 2.143224 | 2.614098 | 315.3896 | 5.11E-31 | 1.31E-29 |
| LOC114322902 | 0.855362 | 0.881908 | 1.166286 | 0.281005 | 0.221254 | 0.198296 | 1.958987 | 0.890154 | 83.50454 | 1.93E-14 | 1.31E-13 |
| LOC114322914 | 7.470066 | 7.175723 | 7.790334 | 1.227503 | 1.32893  | 1.276107 | 2.43404  | 1.682701 | 215.4083 | 1.67E-25 | 2.83E-24 |
| LOC114322958 | 1.37451  | 1.238156 | 1.254654 | 0.499723 | 0.605331 | 0.319698 | 1.343425 | 0.436216 | 32.32071 | 1.63E-07 | 5.83E-07 |
| LOC114322933 | 12.43159 | 12.58304 | 12.29185 | 4.812419 | 5.430514 | 5.130822 | 1.168873 | 4.427232 | 388.2835 | 3.11E-34 | 1.01E-32 |
| LOC114323019 | 2.900348 | 1.993402 | 2.400397 | 0.958603 | 0.808684 | 0.983617 | 1.307569 | 0.521952 | 32.99483 | 1.27E-07 | 4.58E-07 |
| LOC114323055 | 8.165203 | 8.079576 | 8.427725 | 2.120412 | 1.593653 | 1.603179 | 2.127891 | 3.08618  | 467.4859 | 3.29E-37 | 1.35E-35 |
| LOC114323022 | 0.769584 | 0.63547  | 0.958317 | 0.373058 | 0.391644 | 0.329067 | 1.005564 | 0.145551 | 15.46105 | 0.000166 | 0.000405 |
| LOC114323069 | 0.450059 | 0.414626 | 0.472021 | 1.301565 | 1.024809 | 1.433936 | -1.58843 | 0.375036 | 48.63069 | 5.21E-10 | 2.39E-09 |

|              |          |          |          |          |          |          |          |          |          |          |          |
|--------------|----------|----------|----------|----------|----------|----------|----------|----------|----------|----------|----------|
| LOC114323057 | 4.430166 | 3.953038 | 4.867608 | 9.876628 | 9.989844 | 11.48834 | -1.35141 | 2.447733 | 143.2938 | 3.02E-20 | 3.29E-19 |
| LOC114323065 | 0        | 0.075401 | 0        | 2.678001 | 4.408825 | 4.877821 | -6.98566 | -0.09734 | 183.4937 | 3.39E-23 | 4.78E-22 |
| LOC114323098 | 32.99752 | 33.04822 | 32.14067 | 65.30113 | 62.52245 | 65.52121 | -1.08249 | 6.920504 | 1176.143 | 1.68E-33 | 5.09E-32 |
| LOC114323130 | 0.682783 | 0.563796 | 0.825222 | 2.110002 | 1.987098 | 1.532747 | -1.52733 | 0.802199 | 59.58752 | 1.62E-11 | 8.53E-11 |
| LOC114323188 | 1.715589 | 2.305636 | 1.945795 | 0.150902 | 0.039605 | 0.114092 | 4.174003 | 0.327214 | 138.7625 | 7.3E-20  | 7.75E-19 |
| LOC114323200 | 1.17493  | 1.193265 | 0.734066 | 1.800783 | 2.242222 | 1.773139 | -1.01121 | 1.00479  | 30.71225 | 3.08E-07 | 1.06E-06 |
| LOC114323231 | 3.302001 | 3.077852 | 3.171537 | 0.636021 | 0.594678 | 0.57104  | 2.302626 | 1.432871 | 167.1856 | 3.76E-22 | 4.8E-21  |
| LOC114323278 | 4.895774 | 5.457504 | 6.508821 | 2.625395 | 2.382475 | 2.489638 | 1.063762 | 2.337006 | 76.26907 | 1.33E-13 | 8.42E-13 |
| LOC114323240 | 2.363411 | 1.848052 | 2.38038  | 0        | 0        | 0        | 7.703753 | -0.69177 | 84.6271  | 1.74E-14 | 1.19E-13 |
| LOC114323288 | 5.461429 | 6.221342 | 5.323578 | 1.738349 | 1.186222 | 1.518762 | 1.843798 | 2.355267 | 203.845  | 9.43E-25 | 1.49E-23 |
| LOC114323297 | 20.58906 | 20.47464 | 20.83162 | 7.452534 | 6.774897 | 7.0744   | 1.436199 | 4.995556 | 889.6396 | 3.8E-48  | 3.35E-46 |
| LOC114323298 | 0.361395 | 0.32942  | 0.19854  | 0.125134 | 0.061579 | 0.082784 | 1.653819 | -0.37041 | 23.75103 | 4.74E-06 | 1.43E-05 |
| LOC114323330 | 11.03846 | 10.53485 | 11.07638 | 4.724325 | 5.011907 | 4.699893 | 1.070465 | 4.10333  | 287.6784 | 1.22E-29 | 2.81E-28 |
| LOC114323344 | 1.523744 | 1.584474 | 1.353998 | 0.454081 | 0.655468 | 0.572195 | 1.282083 | 1.91992  | 83.72605 | 1.82E-14 | 1.24E-13 |
| LOC114323357 | 0.010633 | 0.011973 | 0.058414 | 0.521873 | 0.639186 | 0.613779 | -4.50627 | -0.14578 | 140.515  | 5.18E-20 | 5.55E-19 |
| LOC114323375 | 0.635827 | 0.583358 | 0.439865 | 0.119863 | 0.141564 | 0.084151 | 2.164587 | 1.16232  | 113.9315 | 2.23E-17 | 1.93E-16 |
| LOC114323378 | 187.2554 | 177.266  | 182.8823 | 54.53213 | 52.0922  | 55.68843 | 1.648547 | 7.504546 | 2892.93  | 6.91E-58 | 1.4E-55  |
| LOC114323379 | 1.951234 | 1.698777 | 1.723963 | 0.621638 | 0.287916 | 0.497649 | 1.856942 | 0.840371 | 74.37444 | 2.23E-13 | 1.39E-12 |
| LOC114323505 | 0.280871 | 0.09036  | 0.176346 | 1.604661 | 1.493176 | 1.599265 | -3.13088 | -0.53465 | 72.67203 | 3.58E-13 | 2.18E-12 |
| LOC114323432 | 5.028027 | 5.07587  | 5.791204 | 1.922563 | 1.563393 | 1.858692 | 1.470965 | 2.628626 | 174.3317 | 1.1E-22  | 1.47E-21 |
| LOC114323433 | 1.032945 | 1.243307 | 1.095804 | 0.45324  | 0.509809 | 0.562976 | 1.017267 | 0.559731 | 21.9873  | 9.83E-06 | 2.84E-05 |
| LOC114323439 | 0.030464 | 0.053904 | 0.062163 | 0.087023 | 0.149497 | 0.16748  | -1.61229 | -0.52962 | 24.37773 | 3.67E-06 | 1.12E-05 |
| LOC114323446 | 0.641849 | 0.654966 | 0.595035 | 0.291692 | 0.248807 | 0.220539 | 1.222657 | 1.057611 | 44.07187 | 2.41E-09 | 1.04E-08 |
| LOC114323450 | 153.1739 | 162.6432 | 156.7259 | 59.74309 | 60.82512 | 62.04578 | 1.266173 | 6.847878 | 1489.927 | 2.33E-45 | 1.7E-43  |
| LOC114323494 | 1.733568 | 2.468698 | 2.40894  | 0.370743 | 1.094665 | 0.911    | 1.295467 | -0.02177 | 20.52935 | 1.83E-05 | 5.1E-05  |
| LOC114323463 | 0.023209 | 0.008711 | 0.025501 | 2.067333 | 2.137112 | 1.967101 | -6.74769 | 2.04486  | 854.407  | 1.95E-47 | 1.64E-45 |

|              |          |          |          |          |          |          |          |          |          |          |          |
|--------------|----------|----------|----------|----------|----------|----------|----------|----------|----------|----------|----------|
| LOC114323464 | 21.00926 | 20.31075 | 20.52644 | 7.674223 | 7.902997 | 7.129448 | 1.341042 | 5.082886 | 825.5019 | 7.8E-47  | 6.27E-45 |
| LOC114323465 | 1.083627 | 1.200639 | 1.257301 | 0.141828 | 0.210934 | 0.119147 | 2.783666 | 1.27787  | 186.4576 | 1.46E-23 | 2.12E-22 |
| LOC114323422 | 14.95514 | 10.99591 | 13.73407 | 0.304318 | 0.23961  | 0.306781 | 5.406879 | 1.896294 | 522.7868 | 4.79E-39 | 2.26E-37 |
| LOC114323423 | 55.49298 | 54.18518 | 55.39135 | 0.55541  | 0.655967 | 0.787366 | 6.229197 | 4.421696 | 3788.236 | 8.51E-75 | 5.88E-72 |
| LOC114323481 | 0.175267 | 0.112772 | 0.220084 | 0.500665 | 0.519636 | 0.585013 | -1.75641 | -0.15968 | 38.99395 | 1.41E-08 | 5.66E-08 |
| LOC114323559 | 13.63402 | 13.76465 | 14.11699 | 1.806307 | 2.1168   | 2.254983 | 2.626187 | 3.361658 | 836.5801 | 4.56E-47 | 3.72E-45 |
| LOC114323586 | 1.354625 | 1.15176  | 1.275757 | 3.266536 | 3.323765 | 2.887683 | -1.42009 | 1.301454 | 76.70506 | 1.18E-13 | 7.5E-13  |
| LOC114323624 | 1.352932 | 1.292581 | 1.576615 | 3.502766 | 2.75796  | 3.099116 | -1.23956 | 0.77601  | 41.06855 | 6.8E-09  | 2.81E-08 |
| LOC114323627 | 2.610844 | 3.021465 | 3.028012 | 0.659173 | 1.089923 | 1.0466   | 1.484198 | 0.754193 | 49.06389 | 4.52E-10 | 2.09E-09 |
| LOC114323613 | 0.941013 | 1.099115 | 1.172817 | 0.038297 | 0        | 0.019303 | 5.721762 | 1.288543 | 340.4452 | 7.89E-32 | 2.14E-30 |
| LOC114323620 | 3.039214 | 3.737666 | 3.126164 | 0.74447  | 0.86383  | 0.651745 | 2.01931  | 1.547096 | 141.3238 | 4.42E-20 | 4.77E-19 |
| LOC114323652 | 2.244793 | 2.013537 | 2.675468 | 1.037449 | 1.116365 | 0.915114 | 1.071001 | 1.445218 | 44.42441 | 2.13E-09 | 9.24E-09 |
| LOC114323668 | 2.331758 | 1.514743 | 2.364923 | 4.727803 | 4.621051 | 5.176932 | -1.32095 | 0.278824 | 32.22566 | 1.69E-07 | 6.03E-07 |
| LOC114323708 | 24.98915 | 24.61348 | 26.12129 | 10.95546 | 10.31779 | 10.2509  | 1.160991 | 5.000956 | 598.7344 | 2.59E-41 | 1.44E-39 |
| LOC114323762 | 0.900784 | 0.866955 | 0.796207 | 0.027444 | 0.064824 | 0.076081 | 3.747355 | 1.498565 | 306.307  | 1.41E-30 | 3.49E-29 |
| LOC114323763 | 0.930365 | 1.047589 | 0.90865  | 0.046979 | 0.03699  | 0        | 4.899483 | -0.53412 | 80.03483 | 4.81E-14 | 3.17E-13 |
| LOC114323798 | 0.417959 | 0.385605 | 0.399974 | 0.08333  | 0.038595 | 0.051885 | 2.727208 | 1.410058 | 198.3412 | 2.2E-24  | 3.39E-23 |
| LOC114323815 | 1.425368 | 1.175465 | 1.632285 | 0        | 0        | 0        | 8.767661 | 0.241208 | 180.5625 | 6.03E-23 | 8.3E-22  |
| LOC114323817 | 0.954836 | 0.901223 | 0.925692 | 0.153152 | 0.120587 | 0.096495 | 2.81392  | 0.308252 | 94.56205 | 1.18E-15 | 8.85E-15 |
| LOC114323784 | 2.84477  | 2.847293 | 2.679143 | 5.609064 | 5.32121  | 5.399318 | -1.06603 | 3.064177 | 153.5516 | 4.35E-21 | 5.1E-20  |
| LOC114323836 | 1.102445 | 1.119649 | 1.258804 | 0.432246 | 0.309396 | 0.653616 | 1.190888 | 0.296442 | 23.32025 | 5.66E-06 | 1.69E-05 |
| LOC114323859 | 2.714729 | 3.209617 | 3.206495 | 1.357095 | 1.16567  | 1.119337 | 1.222322 | 0.053473 | 20.93285 | 1.53E-05 | 4.32E-05 |
| LOC114323897 | 13.98962 | 13.00513 | 15.42802 | 4.529389 | 6.203857 | 5.029784 | 1.309616 | 3.488231 | 254.4162 | 3.27E-24 | 4.97E-23 |
| LOC114323864 | 0.918004 | 0.930304 | 0.706055 | 2.336275 | 2.562167 | 2.554952 | -1.64989 | 1.167101 | 91.29039 | 2.64E-15 | 1.94E-14 |
| LOC114323876 | 0.972048 | 0.933565 | 1.162268 | 3.689932 | 4.583054 | 4.283003 | -2.14553 | 1.488636 | 177.7534 | 6.14E-23 | 8.45E-22 |
| LOC114323887 | 32.22233 | 32.14444 | 33.93771 | 2.566587 | 2.103893 | 1.993684 | 3.791299 | 4.734321 | 2997.86  | 2.2E-70  | 1.01E-67 |

|              |          |          |          |          |          |          |          |          |          |          |          |
|--------------|----------|----------|----------|----------|----------|----------|----------|----------|----------|----------|----------|
| LOC114323919 | 0.235709 | 0.279376 | 0.163568 | 0.766747 | 0.799029 | 0.784319 | -1.89113 | 0.344377 | 64.36872 | 3.87E-12 | 2.15E-11 |
| LOC114323943 | 0.372436 | 0.343115 | 0.539415 | 1.754105 | 1.308432 | 1.605431 | -1.98557 | 0.843997 | 97.5244  | 5.73E-16 | 4.42E-15 |
| LOC114323944 | 28.67103 | 27.1327  | 29.91387 | 59.41421 | 60.21622 | 60.67412 | -1.17862 | 6.315485 | 1172.943 | 1.06E-48 | 9.88E-47 |
| LOC114323971 | 40.43404 | 37.46874 | 39.66932 | 19.23235 | 17.79167 | 16.02869 | 1.048588 | 4.605657 | 333.0845 | 1.14E-31 | 3.05E-30 |
| LOC114323962 | 0.376277 | 0.388379 | 0.430657 | 0.826505 | 1.032243 | 1.055857 | -1.40384 | 0.455512 | 41.53963 | 5.77E-09 | 2.4E-08  |
| LOC114324006 | 3.612494 | 4.613322 | 4.913093 | 1.041089 | 1.261105 | 1.453174 | 1.674201 | 1.972092 | 131.3669 | 6.49E-19 | 6.39E-18 |
| LOC114324042 | 0.210158 | 0.163826 | 0.159861 | 0.6759   | 0.925532 | 0.666558 | -2.17603 | -0.13045 | 57.26408 | 3.31E-11 | 1.69E-10 |
| LOC114324024 | 2.975318 | 2.884196 | 3.035599 | 1.148819 | 1.192714 | 1.060752 | 1.282567 | 3.46075  | 279.7764 | 3.14E-29 | 7.04E-28 |
| LOC114324051 | 5.275596 | 6.242359 | 5.403533 | 0.487632 | 0.255963 | 0.491578 | 3.639774 | 0.183009 | 113.014  | 1.59E-17 | 1.39E-16 |
| LOC114324098 | 2.011134 | 1.975175 | 2.160612 | 0.89366  | 0.863556 | 0.982792 | 1.054966 | 2.022908 | 65.40488 | 2.86E-12 | 1.61E-11 |
| LOC114324103 | 0.316228 | 0.298641 | 0.347453 | 0.686107 | 0.62782  | 0.658946 | -1.13335 | 0.582863 | 30.66619 | 3.06E-07 | 1.06E-06 |
| LOC114324111 | 3.437558 | 3.047133 | 2.651928 | 0.199432 | 0.575762 | 1.00523  | 2.167538 | 0.688521 | 77.53035 | 4.08E-13 | 2.47E-12 |
| LOC114324115 | 11.24428 | 11.08678 | 12.74677 | 24.6579  | 24.48138 | 26.81988 | -1.22241 | 4.249312 | 401.0558 | 9.58E-35 | 3.25E-33 |
| LOC114255751 | 2.32805  | 1.846041 | 1.945464 | 6.079744 | 4.880849 | 5.1375   | -1.48088 | 1.792738 | 111.6434 | 2.16E-17 | 1.87E-16 |
| LOC114324124 | 5.224147 | 4.995759 | 4.941382 | 9.99204  | 10.81496 | 10.67645 | -1.16175 | 3.972422 | 336.1994 | 5.43E-32 | 1.49E-30 |
| LOC114324125 | 0        | 0.042787 | 0.013917 | 8.726607 | 8.067576 | 8.321391 | -8.80113 | 3.359548 | 2364.413 | 6.12E-66 | 2.29E-63 |
| LOC114255770 | 2.563762 | 2.761277 | 2.735262 | 1.553487 | 1.06362  | 1.123477 | 1.023635 | 0.74947  | 25.35618 | 2.47E-06 | 7.7E-06  |
| LOC114255848 | 2.38863  | 1.913748 | 2.22072  | 8.4337   | 7.100639 | 5.113799 | -1.73709 | 1.595226 | 118.9191 | 2.72E-17 | 2.33E-16 |
| LOC114255817 | 0.590853 | 0.372567 | 1.116615 | 2.448868 | 2.435566 | 2.663582 | -1.96446 | 1.065719 | 93.42388 | 3.15E-13 | 1.93E-12 |
| LOC114255797 | 3.584475 | 3.901574 | 4.305998 | 0.825352 | 0.684057 | 1.313734 | 1.930566 | 1.657628 | 136.7126 | 1.62E-19 | 1.68E-18 |
| LOC114255831 | 0.59279  | 0.820444 | 0.597046 | 0.02245  | 0        | 0.033947 | 4.915831 | -0.06127 | 113.0209 | 1.59E-17 | 1.39E-16 |
| LOC114255859 | 1.255562 | 1.262286 | 0.985385 | 0.081514 | 0        | 0.12326  | 3.931884 | -0.07769 | 93.51015 | 1.52E-15 | 1.14E-14 |
| LOC114255843 | 1.212267 | 2.145015 | 1.61739  | 4.013854 | 3.098406 | 4.105843 | -1.28373 | 0.947796 | 46.16474 | 1.26E-09 | 5.58E-09 |
| LOC114255865 | 0.157252 | 0.221332 | 0.129585 | 0.535981 | 0.675222 | 0.729431 | -2.04443 | -0.56791 | 37.3337  | 2.56E-08 | 1E-07    |
| LOC114255877 | 3.577573 | 2.906016 | 3.148574 | 1.294207 | 1.553998 | 1.198675 | 1.145369 | 1.975537 | 70.83308 | 6E-13    | 3.58E-12 |
| LOC114255925 | 0.479653 | 0.413009 | 0.558016 | 1.436109 | 1.373046 | 2.09404  | -1.86806 | 0.23655  | 57.33977 | 3.23E-11 | 1.65E-10 |

|              |          |          |          |          |          |          |          |          |          |          |          |
|--------------|----------|----------|----------|----------|----------|----------|----------|----------|----------|----------|----------|
| LOC114255943 | 0.750056 | 1.161271 | 0.865323 | 3.135975 | 2.469161 | 2.706051 | -1.6824  | 1.596667 | 119.2445 | 4.06E-18 | 3.75E-17 |
| LOC114255963 | 12.56427 | 12.0194  | 12.70963 | 2.378339 | 2.169866 | 2.169245 | 2.372795 | 3.400187 | 756.8029 | 2.54E-45 | 1.84E-43 |
| LOC114255958 | 0.294096 | 0.280205 | 0.298279 | 0.986978 | 0.777114 | 0.901688 | -1.69294 | -0.26986 | 34.20606 | 8.06E-08 | 2.98E-07 |
| LOC114256022 | 1.409652 | 1.352115 | 1.328946 | 0.474536 | 0.348725 | 0.394661 | 1.657575 | 1.652705 | 114.0307 | 1.27E-17 | 1.12E-16 |
| LOC114256128 | 10.74853 | 10.60422 | 11.15817 | 3.550137 | 4.223947 | 4.135581 | 1.332908 | 3.937048 | 392.888  | 2.03E-34 | 6.69E-33 |
| LOC114256143 | 8.882023 | 7.915011 | 9.938663 | 2.27826  | 1.559848 | 1.27317  | 2.315931 | 1.593533 | 176.5325 | 7.55E-23 | 1.03E-21 |
| LOC114256178 | 1.601296 | 1.024464 | 1.399532 | 3.373964 | 2.760724 | 3.551326 | -1.35611 | 0.958885 | 53.81528 | 9.74E-11 | 4.79E-10 |
| LOC114256190 | 2.497595 | 2.713857 | 2.620723 | 0.544822 | 0.339605 | 0.429087 | 2.489324 | 1.90658  | 248.7928 | 1.59E-27 | 3.1E-26  |
| LOC114256184 | 0.955551 | 1.166873 | 1.153415 | 0.073395 | 0.057789 | 0.073989 | 3.853033 | 0.500332 | 152.7217 | 5.07E-21 | 5.91E-20 |
| LOC114256219 | 4.891585 | 4.56299  | 5.119811 | 55.19882 | 56.95853 | 57.71454 | -3.64824 | 6.434013 | 8922.273 | 4.08E-91 | 2.16E-87 |
| LOC114256256 | 4.822766 | 5.866444 | 5.105581 | 1.663797 | 1.259632 | 1.741772 | 1.652046 | 1.586035 | 105.1515 | 9.45E-17 | 7.76E-16 |
| LOC114256264 | 0.305516 | 0.181058 | 0.229678 | 1.92919  | 1.956261 | 1.944803 | -3.10315 | 1.058758 | 230.3418 | 1.96E-26 | 3.55E-25 |
| LOC114256306 | 1.597652 | 1.699011 | 1.755407 | 3.146266 | 4.319333 | 3.171729 | -1.18771 | 0.875537 | 39.78978 | 1.07E-08 | 4.31E-08 |
| LOC114256316 | 1.988504 | 1.205643 | 1.638639 | 4.17086  | 3.886061 | 3.679038 | -1.36402 | 1.156465 | 62.05852 | 7.69E-12 | 4.17E-11 |
| LOC114256352 | 3.048185 | 2.549671 | 3.397014 | 0.791579 | 0.872568 | 0.778036 | 1.76665  | 0.506774 | 55.24797 | 6.2E-11  | 3.09E-10 |
| LOC114256363 | 0.386327 | 0.341788 | 0.333515 | 1.103572 | 0.987404 | 1.175714 | -1.71056 | -0.26134 | 35.21134 | 5.56E-08 | 2.09E-07 |
| LOC114256437 | 3.78515  | 4.282861 | 4.645798 | 1.376145 | 1.083531 | 1.167348 | 1.712695 | 2.170581 | 163.0841 | 7.74E-22 | 9.66E-21 |
| LOC114256438 | 4.984487 | 3.31649  | 4.63027  | 10.29649 | 10.31224 | 9.964622 | -1.33755 | 2.295073 | 123.2978 | 1.71E-18 | 1.62E-17 |
| LOC114256440 | 0.302939 | 0.401304 | 0.215374 | 0.178164 | 0.051011 | 0.14695  | 1.213201 | -0.28637 | 14.1142  | 0.000327 | 0.000762 |
| LOC114256500 | 1.323693 | 0.964425 | 1.112186 | 6.65254  | 4.123522 | 4.922768 | -2.26436 | 0.332601 | 83.46663 | 1.95E-14 | 1.32E-13 |
| LOC114256474 | 7.899809 | 7.144713 | 8.289431 | 3.068175 | 2.888035 | 2.912774 | 1.292156 | 4.656555 | 519.5148 | 6.09E-39 | 2.85E-37 |
| LOC114256502 | 4.84122  | 4.577612 | 4.76232  | 9.345801 | 8.439406 | 8.928565 | -1.01578 | 4.329387 | 301.8174 | 2.35E-30 | 5.7E-29  |
| LOC114256494 | 2.456164 | 2.279088 | 2.448811 | 6.201204 | 6.835668 | 6.720244 | -1.56721 | 2.599362 | 215.741  | 1.59E-25 | 2.7E-24  |
| LOC114256529 | 56.05054 | 54.09215 | 55.31537 | 111.9562 | 112.8536 | 115.2833 | -1.14495 | 6.516249 | 1203.35  | 1.27E-42 | 7.8E-41  |
| LOC114256563 | 5.668676 | 6.494898 | 6.173776 | 2.440573 | 2.490995 | 2.802036 | 1.128039 | 1.442559 | 50.28245 | 3.03E-10 | 1.43E-09 |
| LOC114256564 | 10.82599 | 11.54301 | 11.18784 | 3.050147 | 3.026653 | 3.632935 | 1.673792 | 3.236695 | 366.3251 | 2.55E-33 | 7.68E-32 |

|              |          |          |          |          |          |          |          |          |          |          |          |
|--------------|----------|----------|----------|----------|----------|----------|----------|----------|----------|----------|----------|
| LOC114256590 | 0.897048 | 0.803936 | 0.905165 | 0.299511 | 0.18342  | 0.276774 | 1.681072 | 0.032443 | 35.59547 | 4.83E-08 | 1.83E-07 |
| LOC114256586 | 1.878239 | 1.655134 | 1.85664  | 0.696564 | 0.638361 | 0.604353 | 1.37741  | 2.560621 | 149.2253 | 9.75E-21 | 1.11E-19 |
| LOC114256695 | 0.82211  | 0.640865 | 0.59061  | 0.114958 | 0.090514 | 0.130374 | 2.489401 | -0.20365 | 52.97977 | 1.27E-10 | 6.19E-10 |
| LOC114256658 | 4.975436 | 4.427648 | 4.71725  | 1.568192 | 2.182334 | 1.875001 | 1.207192 | 2.323169 | 98.20585 | 4.86E-16 | 3.78E-15 |
| LOC114256659 | 16.04584 | 16.20517 | 16.60668 | 7.223001 | 6.857231 | 7.081129 | 1.102779 | 4.199597 | 320.3554 | 2.96E-31 | 7.72E-30 |
| LOC114256705 | 0.606604 | 0.387669 | 0.666502 | 0.089408 | 0.234656 | 0.225329 | 1.427507 | -0.36195 | 18.85125 | 3.73E-05 | 9.98E-05 |
| LOC114256706 | 4.64776  | 3.535122 | 3.686284 | 0.447618 | 1.189484 | 1.311419 | 1.844426 | 1.332576 | 92.03158 | 9.11E-14 | 5.84E-13 |
| LOC114256662 | 6.497314 | 5.734132 | 5.402388 | 1.723761 | 1.658839 | 2.558298 | 1.447133 | 1.787268 | 93.83948 | 1.41E-15 | 1.05E-14 |
| LOC114256710 | 2.275179 | 1.821758 | 2.166523 | 1.286715 | 0.868385 | 0.764379 | 1.032318 | 0.000515 | 14.56353 | 0.00025  | 0.000593 |
| LOC114256636 | 0.293372 | 0.251685 | 0.353039 | 0.584088 | 0.599858 | 0.518413 | -1.01784 | -0.01432 | 15.86756 | 0.000139 | 0.000342 |
| LOC114256640 | 1.192405 | 0.773728 | 1.465586 | 0.367386 | 0.202487 | 0.611093 | 1.412931 | 0.315927 | 27.05391 | 2.96E-06 | 9.15E-06 |
| LOC114256676 | 3.435735 | 3.050532 | 3.720864 | 8.909426 | 8.054893 | 8.496347 | -1.41968 | 3.885371 | 459.012  | 6.52E-37 | 2.62E-35 |
| LOC114256689 | 4.9114   | 4.810145 | 4.778028 | 1.302007 | 1.171608 | 1.142617 | 1.905192 | 2.83224  | 327.9483 | 1.3E-31  | 3.47E-30 |
| LOC114256645 | 0.397595 | 0.212064 | 0.390869 | 0.760796 | 0.898538 | 0.805301 | -1.39254 | -0.17663 | 25.08723 | 2.75E-06 | 8.53E-06 |
| LOC114256721 | 1.452028 | 1.388854 | 1.423855 | 7.010359 | 7.95555  | 8.304551 | -2.55856 | 3.179197 | 770.7598 | 1.22E-45 | 9.03E-44 |
| LOC114256803 | 1.55705  | 1.216951 | 1.78124  | 0.765883 | 0.576812 | 0.767885 | 1.011366 | 1.896877 | 50.599   | 3.79E-10 | 1.77E-09 |
| LOC114256818 | 6.661975 | 7.406415 | 6.54766  | 1.941733 | 2.695613 | 2.318029 | 1.443841 | 2.31789  | 133.4383 | 2.11E-19 | 2.16E-18 |
| LOC114256820 | 0.229311 | 0.258203 | 0.274858 | 0.606321 | 0.581827 | 0.616003 | -1.34672 | 0.363505 | 36.18808 | 3.89E-08 | 1.49E-07 |
| LOC114256926 | 4.956656 | 4.982344 | 4.850054 | 1.218133 | 1.354943 | 1.37418  | 1.790838 | 3.141926 | 385.5264 | 4.03E-34 | 1.29E-32 |
| LOC114256935 | 0.311015 | 0.363335 | 0.294738 | 0.113074 | 0.111288 | 0.069462 | 1.629449 | 0.789082 | 57.88025 | 2.73E-11 | 1.41E-10 |
| LOC114256957 | 0.35107  | 0.263536 | 0.321446 | 1.666364 | 1.004966 | 1.233082 | -2.12033 | 0.350815 | 75.75935 | 1.53E-13 | 9.61E-13 |
| LOC114257002 | 20.66986 | 19.19896 | 21.47367 | 0.974685 | 1.304638 | 1.289627 | 3.973022 | 3.582858 | 1557.15  | 3.24E-58 | 6.69E-56 |
| LOC114257043 | 7.383702 | 7.789724 | 8.624399 | 2.297503 | 2.475441 | 2.194197 | 1.659917 | 1.271533 | 87.80194 | 6.37E-15 | 4.52E-14 |
| LOC114257026 | 0.260851 | 0.399456 | 0.401251 | 0.834557 | 1.015522 | 1.132902 | -1.6205  | 1.002295 | 75.71841 | 1.54E-13 | 9.71E-13 |
| LOC114257029 | 1.379311 | 1.0521   | 1.161073 | 0.465071 | 0.398023 | 0.397491 | 1.419157 | 1.19016  | 62.1202  | 7.55E-12 | 4.09E-11 |
| LOC114257030 | 0.127564 | 0.079798 | 0.28032  | 1.442864 | 1.643233 | 1.850644 | -3.44372 | 0.972168 | 225.4003 | 5.56E-25 | 8.98E-24 |

|              |          |          |          |          |          |          |          |          |          |          |          |
|--------------|----------|----------|----------|----------|----------|----------|----------|----------|----------|----------|----------|
| LOC114257081 | 4.282127 | 5.491342 | 4.138615 | 8.865274 | 10.4987  | 9.917913 | -1.18936 | 2.478035 | 109.0475 | 4.44E-17 | 3.74E-16 |
| LOC114257089 | 43.68367 | 45.32694 | 43.14303 | 0.809074 | 0.613444 | 0.838278 | 5.764713 | 5.313804 | 7317.827 | 2.54E-87 | 7.34E-84 |
| LOC114257104 | 2.119856 | 1.952962 | 2.483169 | 0.987265 | 0.802415 | 0.77052  | 1.265193 | 1.430248 | 59.85957 | 1.49E-11 | 7.89E-11 |
| LOC114257097 | 1.596975 | 1.6758   | 1.745476 | 0.759951 | 0.81377  | 0.723966 | 1.018882 | 2.157061 | 66.5285  | 2.06E-12 | 1.17E-11 |
| LOC114257110 | 23.89773 | 21.99784 | 23.24753 | 67.5543  | 71.60786 | 73.51739 | -1.72714 | 5.322363 | 1601.779 | 9.84E-59 | 2.1E-56  |
| LOC114257114 | 0.47278  | 0.51834  | 0.505793 | 0.158316 | 0.320535 | 0.085498 | 1.284762 | -0.10756 | 18.55039 | 4.38E-05 | 0.000116 |
| LOC114257126 | 0.432125 | 0.421695 | 0.506446 | 0.837894 | 1.07206  | 1.187824 | -1.3071  | -0.26103 | 21.32349 | 1.3E-05  | 3.7E-05  |
| LOC114257147 | 0.828277 | 0.799404 | 1.018403 | 0.179245 | 0.084679 | 0.135522 | 2.630047 | -0.18077 | 57.97428 | 2.66E-11 | 1.37E-10 |
| LOC114257174 | 9.146176 | 9.130417 | 9.040426 | 2.817985 | 2.508936 | 2.736993 | 1.65818  | 3.884697 | 584.9028 | 6.41E-41 | 3.42E-39 |
| LOC114257177 | 3.712096 | 3.219377 | 3.658776 | 7.206887 | 7.676637 | 7.362123 | -1.17644 | 4.615339 | 447.3804 | 1.7E-36  | 6.64E-35 |
| LOC114257185 | 10.51689 | 10.33025 | 9.424569 | 40.54063 | 38.11223 | 44.28584 | -2.12654 | 3.395818 | 695.5805 | 7.25E-44 | 4.8E-42  |
| LOC114257192 | 0.378471 | 0.385571 | 0.488449 | 0        | 0.034394 | 0.02477  | 4.129899 | 0.282024 | 129.8831 | 4.34E-19 | 4.33E-18 |
| LOC114257315 | 10.7587  | 9.239703 | 9.967739 | 1.491666 | 1.174488 | 1.127804 | 2.892087 | 1.922565 | 311.7398 | 7.66E-31 | 1.94E-29 |
| LOC114257295 | 2.226955 | 2.002555 | 1.962577 | 0.49197  | 0.597642 | 0.552631 | 1.799074 | 2.361821 | 205.4144 | 7.42E-25 | 1.19E-23 |
| LOC114257296 | 1.648328 | 1.566011 | 1.188525 | 2.153637 | 2.949047 | 3.893761 | -1.15951 | 0.454249 | 27.39853 | 1.09E-06 | 3.55E-06 |
| LOC114257329 | 0.738129 | 0.794598 | 0.868942 | 0.30227  | 0.249607 | 0.183945 | 1.623479 | 1.982234 | 128.1566 | 6.2E-19  | 6.11E-18 |
| LOC114257331 | 0.080026 | 0.098301 | 0.119902 | 0.648017 | 0.687245 | 0.789913 | -2.94199 | 0.774578 | 175.8755 | 8.43E-23 | 1.15E-21 |
| LOC114257345 | 3.195695 | 2.909301 | 3.02225  | 8.517168 | 7.086559 | 8.138669 | -1.48032 | 4.762296 | 726.5368 | 1.41E-42 | 8.55E-41 |
| LOC114257454 | 0.238776 | 0.107544 | 0.052471 | 7.899738 | 7.928776 | 7.088541 | -5.83063 | 1.315266 | 481.8531 | 1.05E-37 | 4.47E-36 |
| LOC114257478 | 3.91131  | 3.674966 | 4.14573  | 1.56955  | 1.50769  | 1.673232 | 1.19642  | 3.259742 | 209.4515 | 4.04E-25 | 6.62E-24 |
| LOC114257483 | 1.35589  | 1.2635   | 1.438402 | 0.637439 | 0.568818 | 0.481949 | 1.17146  | 0.407596 | 25.49336 | 2.34E-06 | 7.31E-06 |
| LOC114257590 | 5.5047   | 5.450212 | 6.517504 | 0.172527 | 0.135842 | 0.195664 | 4.94961  | 1.010667 | 274.3106 | 6.12E-29 | 1.34E-27 |
| LOC114257601 | 0.631068 | 1.006656 | 0.808944 | 1.720753 | 2.107565 | 1.951514 | -1.36    | -0.25256 | 22.86508 | 6.83E-06 | 2.02E-05 |
| LOC114257611 | 3.079335 | 2.865849 | 2.382185 | 6.34023  | 6.02648  | 6.693844 | -1.29589 | 2.156637 | 110.4803 | 2.8E-17  | 2.4E-16  |
| LOC114257644 | 297.9867 | 293.2484 | 292.4224 | 623.4804 | 610.3333 | 625.6681 | -1.17858 | 9.179283 | 2763.125 | 2.21E-23 | 3.17E-22 |
| LOC114257677 | 0.653689 | 0.556528 | 0.788308 | 0        | 0.04564  | 0.087652 | 3.614361 | -0.34638 | 70.45113 | 6.69E-13 | 3.98E-12 |



|              |          |          |          |          |          |          |          |          |          |          |          |
|--------------|----------|----------|----------|----------|----------|----------|----------|----------|----------|----------|----------|
| LOC114257730 | 38.56369 | 39.22796 | 39.33958 | 12.06405 | 11.43414 | 11.75714 | 1.627811 | 5.770242 | 1770.836 | 1.41E-60 | 3.36E-58 |
| LOC114257740 | 1.369225 | 1.150379 | 1.330837 | 0.497801 | 0.467328 | 0.535607 | 1.251998 | 1.399318 | 59.03791 | 1.92E-11 | 1E-10    |
| LOC114257741 | 6.921727 | 7.572355 | 7.794307 | 2.614828 | 2.533942 | 2.940143 | 1.350102 | 3.626292 | 330.033  | 1.04E-31 | 2.79E-30 |
| LOC114257720 | 2.066125 | 1.74203  | 2.149503 | 0.43546  | 0.600017 | 0.617322 | 1.720452 | 1.964394 | 143.7282 | 2.78E-20 | 3.04E-19 |
| LOC114257750 | 4.554008 | 4.158368 | 4.605376 | 1.194392 | 1.588993 | 1.556972 | 1.492441 | 1.995263 | 118.0968 | 5.21E-18 | 4.75E-17 |
| LOC114257749 | 0.723086 | 0.581566 | 0.324279 | 0.241428 | 0.274578 | 0.182536 | 1.128927 | -0.17328 | 13.81185 | 0.000369 | 0.000853 |
| LOC114257726 | 7.945646 | 7.933937 | 8.606672 | 121.6819 | 110.9359 | 118.9407 | -3.94809 | 5.698683 | 7407.347 | 1.49E-87 | 4.73E-84 |
| LOC114257769 | 0.937486 | 1.055607 | 0.756775 | 0.034779 | 0.164304 | 0.131478 | 2.844604 | -0.11632 | 65.45251 | 2.82E-12 | 1.59E-11 |
| LOC114257786 | 1.868642 | 2.133515 | 1.923936 | 0.403822 | 0.448879 | 0.682475 | 1.809869 | 1.56382  | 119.2243 | 4.08E-18 | 3.76E-17 |
| LOC114257800 | 0.35842  | 0.265772 | 0.288154 | 2.828651 | 2.7527   | 2.571195 | -3.24751 | 2.410532 | 588.1721 | 5.16E-41 | 2.78E-39 |
| LOC114257899 | 1.06284  | 1.019459 | 0.95153  | 0.357788 | 0.56342  | 0.378717 | 1.098052 | 0.265046 | 20.08745 | 2.19E-05 | 6.05E-05 |
| LOC114257841 | 0.094725 | 0.094471 | 0.074342 | 0        | 0.003874 | 0.00372  | 4.707609 | -0.69834 | 68.19998 | 1.27E-12 | 7.36E-12 |
| LOC114257842 | 1.207916 | 1.196898 | 1.628017 | 0        | 0.046103 | 0.044271 | 5.157225 | 0.491408 | 180.0329 | 4.2E-23  | 5.87E-22 |
| LOC114257879 | 80.87336 | 77.80451 | 80.97866 | 29.4805  | 34.24338 | 29.27771 | 1.257097 | 4.948596 | 604.6313 | 3.12E-39 | 1.5E-37  |
| LOC114257995 | 1.804171 | 1.167027 | 1.518371 | 0        | 0        | 0        | 7.9284   | -0.50211 | 97.86644 | 6.62E-16 | 5.07E-15 |
| LOC114258027 | 2.339256 | 2.072909 | 2.34211  | 4.654938 | 4.814214 | 5.003338 | -1.20568 | 2.968112 | 177.4934 | 6.42E-23 | 8.81E-22 |
| LOC114258088 | 0.87147  | 0.806824 | 0.829851 | 0.070408 | 0.138592 | 0.23955  | 2.291278 | -0.19033 | 47.36436 | 7.92E-10 | 3.58E-09 |
| LOC114258090 | 46.36562 | 40.49134 | 47.19393 | 13.61867 | 11.91431 | 11.32633 | 1.769185 | 3.358648 | 435.5054 | 4.61E-36 | 1.74E-34 |
| LOC114258113 | 0.324016 | 0.165837 | 0.161823 | 0.508685 | 0.632402 | 0.56678  | -1.47276 | -0.22026 | 26.44608 | 1.59E-06 | 5.1E-06  |
| LOC114258117 | 2.092976 | 1.389841 | 1.474128 | 0.438999 | 0.460871 | 0.331914 | 1.914667 | 0.337669 | 53.19737 | 1.19E-10 | 5.79E-10 |
| LOC114258145 | 2.347401 | 2.097297 | 2.551153 | 1.113171 | 1.168632 | 0.806567 | 1.083998 | 1.051249 | 34.57657 | 7.03E-08 | 2.61E-07 |
| LOC114258166 | 0.496433 | 0.298124 | 0.436361 | 0.812184 | 0.947387 | 1.000703 | -1.26679 | 0.341948 | 30.95177 | 2.74E-07 | 9.54E-07 |
| LOC114258187 | 5.396789 | 4.773237 | 5.536859 | 0        | 0        | 0        | 10.89398 | 2.22598  | 804.1481 | 9.3E-46  | 6.93E-44 |
| LOC114258188 | 0.700779 | 0.789075 | 0.739176 | 4.840785 | 4.613886 | 4.584595 | -2.75328 | 1.569618 | 281.9574 | 2.41E-29 | 5.45E-28 |
| LOC114258201 | 9.356976 | 9.034847 | 10.00453 | 18.97544 | 21.5289  | 21.53742 | -1.23781 | 4.196152 | 398.2421 | 1.24E-34 | 4.15E-33 |
| LOC114258255 | 3.339536 | 3.497963 | 3.157294 | 1.03531  | 1.111593 | 1.352051 | 1.391363 | 1.436461 | 72.78161 | 3.48E-13 | 2.12E-12 |

|              |          |          |          |          |          |          |          |          |          |          |          |
|--------------|----------|----------|----------|----------|----------|----------|----------|----------|----------|----------|----------|
| LOC114258315 | 3.219164 | 2.792857 | 3.131141 | 0.86339  | 0.453203 | 0.435189 | 2.321533 | 0.19115  | 65.22629 | 3.01E-12 | 1.69E-11 |
| LOC114258278 | 0.829948 | 0.742823 | 0.561168 | 1.508697 | 1.340192 | 1.286921 | -1.0403  | 0.616543 | 25.89825 | 1.98E-06 | 6.27E-06 |
| LOC114258291 | 9.455467 | 8.168391 | 9.639737 | 0        | 0        | 0.042608 | 8.699358 | 2.161837 | 746.6952 | 4.34E-45 | 3.07E-43 |
| LOC114258292 | 4.315506 | 4.162053 | 4.288079 | 12.65403 | 9.829084 | 12.1977  | -1.53981 | 3.690076 | 443.4456 | 3.77E-34 | 1.21E-32 |
| LOC114258297 | 2.256188 | 2.583521 | 2.352918 | 1.042715 | 0.930465 | 1.313942 | 1.008637 | 0.554023 | 21.49724 | 1.21E-05 | 3.45E-05 |
| LOC114258331 | 0.568556 | 0.640193 | 0.460303 | 1.468706 | 1.37056  | 1.85074  | -1.59753 | 0.158711 | 41.78231 | 5.3E-09  | 2.21E-08 |
| LOC114258365 | 3.4365   | 3.205325 | 3.296803 | 0.139857 | 0.073412 | 0.105742 | 4.840604 | 1.084205 | 289.1113 | 1.03E-29 | 2.38E-28 |
| LOC114258347 | 1.555805 | 1.859402 | 1.709428 | 0.099234 | 0.039067 | 0.093785 | 4.345208 | 1.057345 | 253.64   | 8.4E-28  | 1.67E-26 |
| LOC114258348 | 0.493278 | 0.571766 | 0.382578 | 0.210986 | 0.062296 | 0.15952  | 1.667628 | -0.42227 | 23.22731 | 5.88E-06 | 1.75E-05 |
| LOC114258403 | 4.542837 | 3.864339 | 4.708049 | 1.694887 | 1.930762 | 1.581367 | 1.226178 | 2.232528 | 95.34014 | 9.73E-16 | 7.37E-15 |
| LOC114258411 | 0.668674 | 0.607198 | 0.853201 | 0.29408  | 0.246985 | 0.251991 | 1.325045 | 0.540243 | 34.23685 | 7.97E-08 | 2.95E-07 |
| LOC114258418 | 60.47019 | 55.63513 | 54.83067 | 219.4258 | 210.9953 | 213.3016 | -2.01801 | 7.169767 | 3756.251 | 7.76E-73 | 4.33E-70 |
| LOC114258452 | 1.73847  | 1.405395 | 1.567286 | 7.941088 | 6.890561 | 7.71945  | -2.34978 | 1.64529  | 231.0764 | 1.77E-26 | 3.21E-25 |
| LOC114258483 | 0.685262 | 0.467023 | 0.317021 | 0.917872 | 0.825945 | 1.040963 | -1.01008 | 0.31368  | 18.72326 | 3.98E-05 | 0.000106 |
| LOC114258517 | 7.745308 | 7.376139 | 7.451624 | 3.712528 | 2.867967 | 3.018774 | 1.143495 | 2.089861 | 77.93201 | 8.46E-14 | 5.44E-13 |
| LOC114258566 | 5.243818 | 5.322391 | 6.126773 | 0.537032 | 0.792827 | 1.015085 | 2.677979 | 1.425054 | 197.4045 | 2.55E-24 | 3.91E-23 |
| LOC114258540 | 14.50566 | 14.27077 | 12.89181 | 26.03872 | 25.79285 | 27.55738 | -1.03512 | 5.221269 | 558.8461 | 2.02E-39 | 9.79E-38 |
| LOC114258709 | 5.060586 | 5.093853 | 6.150003 | 1.811972 | 3.182607 | 2.318423 | 1.020394 | 0.714764 | 24.03083 | 4.23E-06 | 1.28E-05 |
| LOC114258711 | 3.682447 | 4.363234 | 3.755165 | 1.837577 | 1.929129 | 1.521654 | 1.05457  | 1.864125 | 56.68811 | 3.95E-11 | 2.01E-10 |
| LOC114258730 | 3.556904 | 2.820469 | 3.660421 | 16.57435 | 15.73897 | 15.90519 | -2.36247 | 3.576743 | 915.1168 | 1.21E-48 | 1.12E-46 |
| LOC114258737 | 0.289034 | 0.325452 | 0.221563 | 0.073313 | 0.153932 | 0.129337 | 1.076271 | -0.01644 | 15.12198 | 0.000194 | 0.000467 |
| LOC114258738 | 2.361265 | 2.236191 | 2.439786 | 0.426393 | 0.380491 | 0.322383 | 2.543417 | 1.440991 | 192.131  | 5.86E-24 | 8.75E-23 |
| LOC114258747 | 12.54179 | 11.98637 | 12.76426 | 28.18596 | 27.28274 | 26.84999 | -1.2464  | 4.684223 | 543.9531 | 1.05E-39 | 5.19E-38 |
| LOC114258752 | 3.067102 | 2.812685 | 3.057277 | 5.862838 | 6.019165 | 5.779912 | -1.08598 | 2.10535  | 78.71813 | 6.85E-14 | 4.43E-13 |
| LOC114258764 | 6.952666 | 7.152573 | 7.153055 | 2.412844 | 2.103341 | 2.671265 | 1.456163 | 3.174495 | 272.4425 | 7.71E-29 | 1.67E-27 |
| LOC114258789 | 1.028499 | 1.037093 | 1.113188 | 0.223239 | 0.285628 | 0.253177 | 1.931654 | 0.479026 | 63.35227 | 5.23E-12 | 2.87E-11 |

|              |          |          |          |          |          |          |          |          |          |          |          |
|--------------|----------|----------|----------|----------|----------|----------|----------|----------|----------|----------|----------|
| LOC114258818 | 2.558181 | 2.321746 | 2.481759 | 1.135361 | 0.906191 | 1.034799 | 1.1632   | 2.624406 | 115.6391 | 8.9E-18  | 7.97E-17 |
| LOC114258821 | 0.97119  | 0.913795 | 0.993999 | 0.483685 | 0.323712 | 0.420554 | 1.138584 | 0.713663 | 30.24268 | 3.6E-07  | 1.24E-06 |
| LOC114258823 | 0.641138 | 0.550939 | 0.389299 | 1.932234 | 1.64212  | 1.692793 | -1.81819 | 1.059079 | 97.68421 | 5.51E-16 | 4.26E-15 |
| LOC114258833 | 2.78557  | 2.205384 | 2.167941 | 15.45474 | 16.57082 | 16.21125 | -2.85266 | 4.297618 | 1703.26  | 1.79E-56 | 3.2E-54  |
| LOC114258837 | 1.007847 | 0.930818 | 1.082479 | 0.308778 | 0.275538 | 0.295714 | 1.673734 | 0.869781 | 67.15213 | 1.72E-12 | 9.85E-12 |
| LOC114258854 | 1.76133  | 1.475228 | 1.553917 | 3.312189 | 2.881116 | 3.30322  | -1.08498 | 3.068588 | 153.4406 | 4.44E-21 | 5.2E-20  |
| LOC114258858 | 3.225877 | 2.692198 | 3.836298 | 0.68989  | 0.706156 | 0.521605 | 2.243562 | 0.721232 | 91.64498 | 2.42E-15 | 1.78E-14 |
| LOC114258874 | 1.297808 | 0.867664 | 0.980345 | 27.57296 | 26.70217 | 27.20154 | -4.77865 | 3.428515 | 2002.657 | 7.49E-63 | 2.11E-60 |
| LOC114258870 | 5.282364 | 4.190588 | 4.287012 | 0.654709 | 0.945075 | 1.650018 | 1.923206 | 0.615009 | 65.53197 | 2.75E-12 | 1.55E-11 |
| LOC114258921 | 1.066095 | 0.783948 | 1.051836 | 2.96628  | 3.082925 | 3.438829 | -1.81185 | 1.546977 | 139.0425 | 6.91E-20 | 7.34E-19 |
| LOC114258916 | 1.70931  | 1.241729 | 1.302547 | 0.250582 | 0.27622  | 0.113675 | 2.639003 | 0.003247 | 65.92962 | 2.45E-12 | 1.39E-11 |
| LOC114258950 | 0.797549 | 0.780903 | 0.6858   | 1.449802 | 1.836367 | 1.286786 | -1.11429 | 0.065026 | 19.83239 | 2.44E-05 | 6.71E-05 |
| LOC114258968 | 0.19877  | 0.044763 | 0        | 2.673826 | 2.332879 | 2.349426 | -4.84208 | -0.03166 | 157.1949 | 2.71E-21 | 3.24E-20 |
| LOC114258987 | 7.090233 | 6.72302  | 7.106972 | 2.543838 | 2.403519 | 3.632935 | 1.164991 | 2.270596 | 87.06822 | 7.68E-15 | 5.41E-14 |
| LOC114258989 | 0.768788 | 0.729865 | 0.8447   | 0.246621 | 0.258908 | 0.310771 | 1.395658 | 0.202915 | 29.88929 | 4.13E-07 | 1.41E-06 |
| LOC114258977 | 0.053954 | 0.030376 | 0        | 3.874133 | 4.942359 | 3.70774  | -7.08277 | 1.255461 | 482.0166 | 2.34E-37 | 9.69E-36 |
| LOC114258975 | 0.63351  | 0.580619 | 0.631314 | 1.258735 | 1.321448 | 1.329668 | -1.18936 | 2.581565 | 127.9692 | 6.44E-19 | 6.34E-18 |
| LOC114258997 | 1.117158 | 1.174057 | 1.57116  | 0.379082 | 0.191878 | 0.491335 | 1.745911 | 0.813381 | 61.48881 | 1.74E-11 | 9.11E-11 |
| LOC114258999 | 1.305307 | 1.344304 | 1.661568 | 0.665546 | 0.683515 | 0.61259  | 1.027634 | 1.046888 | 31.51851 | 2.21E-07 | 7.77E-07 |
| LOC114259012 | 0.934372 | 0.97695  | 1.063299 | 4.792256 | 5.158382 | 4.724023 | -2.40567 | 1.438207 | 210.2294 | 3.59E-25 | 5.93E-24 |
| LOC114259020 | 0.723928 | 0.373606 | 0.231994 | 1.096643 | 1.5974   | 1.119337 | -1.59818 | -0.13765 | 30.45786 | 4.19E-07 | 1.43E-06 |
| LOC114259062 | 2.890423 | 2.786993 | 2.500508 | 0.966303 | 0.689506 | 0.547944 | 1.820935 | 1.686009 | 129.0233 | 5.18E-19 | 5.13E-18 |
| LOC114259073 | 0.357107 | 0.449407 | 0.49623  | 0.763713 | 0.88695  | 0.952743 | -1.12178 | 0.94715  | 37.846   | 2.13E-08 | 8.38E-08 |
| LOC114259082 | 778.5207 | 723.7231 | 812.5977 | 219.7003 | 214.6148 | 225.5007 | 1.705003 | 8.663134 | 4098.352 | 4.35E-49 | 4.2E-47  |
| LOC114259083 | 4.957624 | 4.885788 | 5.102263 | 2.366299 | 1.995282 | 2.195121 | 1.08998  | 3.54417  | 218.4697 | 1.07E-25 | 1.83E-24 |
| LOC114259089 | 0.182627 | 0.205638 | 0.313531 | 2.261639 | 2.058468 | 1.945272 | -3.2547  | 1.640259 | 352.8057 | 9.81E-33 | 2.83E-31 |

|              |          |          |          |          |          |          |          |          |          |          |          |
|--------------|----------|----------|----------|----------|----------|----------|----------|----------|----------|----------|----------|
| LOC114259124 | 115.5831 | 101.2182 | 109.7064 | 3.648577 | 4.328302 | 4.193039 | 4.629586 | 5.946121 | 8314.179 | 4.01E-69 | 1.77E-66 |
| LOC114259170 | 1.641335 | 1.493388 | 1.473989 | 0.489578 | 0.53094  | 0.495868 | 1.495789 | 2.606926 | 180.3219 | 4E-23    | 5.61E-22 |
| LOC114259193 | 0.936146 | 0.890127 | 1.028582 | 0.11345  | 0.163765 | 0.200144 | 2.428254 | 0.780095 | 110.1229 | 3.04E-17 | 2.59E-16 |
| LOC114259203 | 3.935975 | 3.764732 | 3.906109 | 10.34768 | 10.02526 | 9.859439 | -1.48291 | 3.33595  | 365.1513 | 2.86E-33 | 8.61E-32 |
| LOC114259204 | 5.211767 | 5.37051  | 4.546403 | 2.239324 | 1.808378 | 1.693085 | 1.309536 | 1.763078 | 79.32082 | 5.82E-14 | 3.8E-13  |
| LOC114259210 | 4.444623 | 4.617373 | 4.970698 | 25.00807 | 26.96086 | 25.99829 | -2.58236 | 4.160676 | 1473.658 | 3.3E-57  | 6.32E-55 |
| LOC114259217 | 1.782916 | 1.412727 | 1.741302 | 0.280088 | 0.315046 | 0.39328  | 2.188083 | 0.545852 | 79.5007  | 5.55E-14 | 3.64E-13 |
| LOC114259223 | 2.040741 | 1.939337 | 2.242247 | 0.894538 | 0.725045 | 0.716117 | 1.321435 | 1.607972 | 74.41508 | 2.21E-13 | 1.37E-12 |
| LOC114259263 | 16.14945 | 15.36101 | 15.76556 | 1.222338 | 0.929803 | 1.127804 | 3.752777 | 4.445965 | 2490.062 | 6.61E-67 | 2.59E-64 |
| LOC114259279 | 2.89638  | 3.700341 | 2.896776 | 6.041366 | 6.112049 | 6.838782 | -1.11391 | 2.968469 | 140.8    | 8.47E-20 | 8.95E-19 |
| LOC114259269 | 36.10093 | 34.54975 | 32.08589 | 12.92498 | 12.17569 | 11.45905 | 1.391338 | 4.035811 | 431.5547 | 6.47E-36 | 2.41E-34 |
| LOC114259284 | 1.983539 | 1.927507 | 1.731576 | 7.359619 | 8.478177 | 7.20756  | -2.134   | 2.435931 | 317.0308 | 4.26E-31 | 1.1E-29  |
| LOC114259287 | 0.569228 | 0.721068 | 0.469076 | 0.90541  | 1.273017 | 1.418003 | -1.16073 | -0.29145 | 16.29775 | 0.000114 | 0.000286 |
| LOC114259303 | 0.520121 | 0.680116 | 0.774262 | 2.012974 | 2.713624 | 2.490462 | -1.99467 | 1.493647 | 151.6647 | 6.17E-21 | 7.14E-20 |
| LOC114259330 | 0        | 0        | 0        | 5.639976 | 4.988215 | 5.666149 | -9.73002 | 0.962277 | 442.566  | 6.71E-36 | 2.5E-34  |
| LOC114259306 | 1.991431 | 1.740769 | 1.612261 | 0.238162 | 0.300033 | 0.324121 | 2.493932 | 0.380069 | 84.76953 | 1.39E-14 | 9.54E-14 |
| LOC114259346 | 7.773363 | 7.065505 | 8.669547 | 20.94051 | 18.76666 | 20.40202 | -1.45713 | 4.187821 | 530.5318 | 2.73E-39 | 1.31E-37 |
| LOC114259382 | 1.501981 | 1.849779 | 2.217576 | 0.426614 | 0.671804 | 0.774121 | 1.411663 | -0.16048 | 22.20166 | 8.99E-06 | 2.61E-05 |
| LOC114259393 | 6.5437   | 5.737065 | 6.572388 | 2.201988 | 2.091251 | 2.488704 | 1.365937 | 3.36161  | 283.1057 | 2.1E-29  | 4.78E-28 |
| LOC114259397 | 0.972048 | 0.739159 | 0.998677 | 2.501351 | 3.071666 | 2.377008 | -1.65552 | 2.112977 | 159.6842 | 2.14E-21 | 2.58E-20 |
| LOC114259424 | 1.890787 | 1.458464 | 1.930263 | 3.734816 | 3.196379 | 3.37626  | -1.05934 | 2.417102 | 86.52497 | 8.82E-15 | 6.18E-14 |
| LOC114259464 | 4.83153  | 6.728782 | 5.238753 | 1.964587 | 1.728832 | 1.135867 | 1.709115 | 0.851168 | 63.37222 | 5.38E-12 | 2.95E-11 |
| LOC114259466 | 24.18379 | 23.21128 | 24.07222 | 5.916712 | 6.361772 | 6.734221 | 1.796943 | 3.687053 | 592.9445 | 3.77E-41 | 2.05E-39 |
| LOC114259448 | 3.711294 | 3.461633 | 3.560426 | 1.006936 | 0.911751 | 0.570985 | 2.026183 | 1.316016 | 121.6893 | 2.41E-18 | 2.26E-17 |
| LOC114259577 | 0.55195  | 0.503914 | 0.557279 | 1.843988 | 1.451895 | 1.373681 | -1.61477 | 1.110249 | 82.97976 | 2.21E-14 | 1.49E-13 |
| LOC114259579 | 7.545161 | 7.752449 | 6.683961 | 3.000322 | 3.307294 | 2.462891 | 1.223673 | 1.745955 | 69.49267 | 8.78E-13 | 5.16E-12 |

|              |          |          |          |          |          |          |          |          |          |          |          |
|--------------|----------|----------|----------|----------|----------|----------|----------|----------|----------|----------|----------|
| LOC114259588 | 1.010718 | 1.111599 | 1.187996 | 0        | 0        | 0        | 8.182144 | -0.2756  | 120.532  | 4.12E-18 | 3.79E-17 |
| LOC114259691 | 19.36896 | 18.14072 | 17.89939 | 8.802326 | 8.270411 | 8.683887 | 1.001622 | 4.490928 | 304.3825 | 1.75E-30 | 4.3E-29  |
| LOC114259738 | 4.039516 | 3.191277 | 3.507756 | 0        | 0.093254 | 0.089547 | 5.560974 | 0.850761 | 252.2436 | 1.01E-27 | 2E-26    |
| LOC114259783 | 1.21417  | 0.901078 | 0.848947 | 2.357631 | 1.895816 | 2.351427 | -1.24222 | 0.842808 | 42.43255 | 4.23E-09 | 1.78E-08 |
| LOC114259791 | 4.473763 | 4.866016 | 4.336458 | 0.681257 | 0.586686 | 0.692136 | 2.696414 | 2.746323 | 503.4334 | 2.01E-38 | 9.02E-37 |
| LOC114259843 | 26.05166 | 18.99282 | 23.94131 | 53.35877 | 45.36362 | 42.57047 | -1.12775 | 4.156132 | 79.30621 | 5.62E-05 | 0.000147 |
| LOC114259883 | 1.146263 | 0.79427  | 0.944585 | 0.200356 | 0.315507 | 0.302966 | 1.67848  | -0.07696 | 32.14196 | 1.75E-07 | 6.21E-07 |
| LOC114259897 | 1.736605 | 1.802476 | 1.854782 | 0.546715 | 0.416579 | 0.773373 | 1.51488  | 1.9123   | 108.0821 | 6.27E-17 | 5.22E-16 |
| LOC114259927 | 1.56998  | 1.87044  | 1.802906 | 0.607614 | 0.594394 | 0.709979 | 1.337845 | 1.857201 | 88.40244 | 5.46E-15 | 3.9E-14  |
| LOC114259935 | 0        | 0        | 0        | 0.458638 | 0.690831 | 0.467375 | -8.36861 | -0.38522 | 158.7655 | 2.49E-21 | 2.98E-20 |
| LOC114259970 | 0.475479 | 0.301156 | 0.35917  | 1.134441 | 1.020824 | 0.918982 | -1.51188 | 0.553806 | 49.84249 | 3.5E-10  | 1.64E-09 |
| LOC114259972 | 16.96837 | 17.0258  | 15.88619 | 0.279904 | 0.220387 | 0.275115 | 5.897034 | 4.016157 | 2784.258 | 5.36E-69 | 2.3E-66  |
| LOC114259977 | 183.0223 | 168.8899 | 192.7746 | 358.4402 | 379.5423 | 412.4555 | -1.1845  | 8.803094 | 273.9382 | 5.22E-05 | 0.000137 |
| LOC114259989 | 0.388687 | 0.161244 | 0.449544 | 3.346882 | 2.928025 | 2.895989 | -3.2697  | 1.342578 | 280.1112 | 5.14E-29 | 1.13E-27 |
| LOC114260025 | 0.39824  | 0.807151 | 0.525075 | 1.013501 | 1.215995 | 1.021703 | -1.03278 | -0.00128 | 15.66972 | 0.000151 | 0.000371 |
| LOC114260040 | 0        | 0.03     | 0.029274 | 1.162383 | 1.258429 | 1.098553 | -5.761   | -0.51726 | 129.884  | 4.34E-19 | 4.33E-18 |
| LOC114260047 | 1.774958 | 1.929682 | 1.681225 | 0.185434 | 0.116804 | 0.140201 | 3.500114 | 0.630938 | 154.645  | 3.56E-21 | 4.21E-20 |
| LOC114260091 | 0.756404 | 0.713594 | 0.718783 | 0.074325 | 0.117042 | 0.084292 | 2.825972 | -0.48602 | 50.7531  | 2.6E-10  | 1.23E-09 |
| LOC114260098 | 15.80443 | 15.63107 | 15.37551 | 3.616602 | 4.127407 | 4.362756 | 1.833758 | 3.714504 | 614.7961 | 9.24E-42 | 5.31E-40 |
| LOC114260194 | 1.070956 | 1.007665 | 1.096108 | 0.053337 | 0.062994 | 0.040327 | 4.186219 | 0.332385 | 146.6322 | 1.59E-20 | 1.77E-19 |
| LOC114260196 | 4.873072 | 5.412415 | 5.135707 | 1.68731  | 1.660664 | 2.095832 | 1.382652 | 1.696889 | 85.59405 | 1.12E-14 | 7.76E-14 |
| LOC114260217 | 6.899322 | 6.776368 | 6.848493 | 1.914471 | 1.599679 | 1.447473 | 1.958371 | 2.581164 | 275.043  | 5.6E-29  | 1.23E-27 |
| LOC114260212 | 7.761656 | 7.300143 | 9.130036 | 1.82591  | 2.091142 | 2.008022 | 1.907678 | 0.813734 | 78.81213 | 6.68E-14 | 4.33E-13 |
| LOC114260205 | 5.773951 | 4.759557 | 4.764046 | 2.614101 | 1.933513 | 2.036335 | 1.132138 | 2.349678 | 85.85057 | 1.05E-14 | 7.28E-14 |
| LOC114260250 | 0.157767 | 0.532936 | 0.577817 | 1.529558 | 2.333375 | 2.023792 | -2.35012 | -0.45693 | 48.30613 | 5.8E-10  | 2.66E-09 |
| LOC114260254 | 17.46485 | 20.00059 | 19.22571 | 3.607726 | 3.882156 | 3.045923 | 2.323467 | 3.341723 | 643.252  | 4.62E-42 | 2.71E-40 |

|              |          |          |          |          |          |          |          |          |          |          |          |
|--------------|----------|----------|----------|----------|----------|----------|----------|----------|----------|----------|----------|
| LOC114260253 | 0.742045 | 0.69023  | 0.797592 | 0.175944 | 0.438686 | 0.199539 | 1.309496 | 0.066734 | 22.66835 | 7.41E-06 | 2.18E-05 |
| LOC114260280 | 0.170889 | 0.080175 | 0.078235 | 5.203326 | 5.809071 | 5.656459 | -5.71528 | 2.619419 | 1132.894 | 1.91E-52 | 2.43E-50 |
| LOC114260283 | 1.22295  | 1.514743 | 1.451203 | 3.379119 | 3.395772 | 3.395261 | -1.38888 | 1.590463 | 89.56119 | 4.08E-15 | 2.94E-14 |
| LOC114260303 | 49.44087 | 46.45747 | 51.19823 | 22.67272 | 23.63571 | 21.80483 | 1.005043 | 4.427331 | 292.3038 | 7.06E-30 | 1.65E-28 |
| LOC114260344 | 3.491458 | 3.754286 | 3.317804 | 0.800503 | 1.035476 | 1.210473 | 1.65804  | 1.182744 | 81.27793 | 3.46E-14 | 2.31E-13 |
| LOC114260348 | 1.23519  | 0.927214 | 1.215784 | 0.467782 | 0.368316 | 0.459779 | 1.28158  | 0.010807 | 21.92995 | 1.01E-05 | 2.91E-05 |
| LOC114260355 | 3.119789 | 2.748308 | 2.742274 | 14.64509 | 16.33784 | 15.0831  | -2.52345 | 3.937105 | 1258.634 | 2.42E-54 | 3.53E-52 |
| LOC114260410 | 0.089989 | 0.086852 | 0.08475  | 0.373906 | 0.441602 | 0.512393 | -2.43863 | -0.58669 | 49.63837 | 3.74E-10 | 1.75E-09 |
| LOC114260382 | 0.767445 | 1.016636 | 0.942426 | 0        | 0.161535 | 0.093068 | 3.155411 | -0.36689 | 59.16255 | 1.85E-11 | 9.67E-11 |
| LOC114260439 | 0.076541 | 0.046407 | 0.077629 | 0.203355 | 0.210677 | 0.186119 | -1.6607  | -0.45169 | 28.51015 | 7.05E-07 | 2.34E-06 |
| LOC114260465 | 223.7201 | 219.9623 | 234.215  | 473.5265 | 474.54   | 473.4656 | -1.17397 | 9.092321 | 2563.948 | 1.76E-23 | 2.55E-22 |
| LOC114260496 | 0.845187 | 0.660348 | 0.928642 | 0.156775 | 0.172815 | 0.237066 | 1.962875 | -0.03047 | 42.93633 | 3.55E-09 | 1.51E-08 |
| LOC114260484 | 6.337677 | 6.648643 | 6.509331 | 0.250451 | 0.112684 | 0.297564 | 4.765613 | 2.37183  | 680.2804 | 1.75E-43 | 1.13E-41 |
| LOC114260531 | 0.152962 | 0.172235 | 0        | 5.28309  | 6.057147 | 5.185692 | -5.66085 | 0.752934 | 312.2546 | 7.23E-31 | 1.83E-29 |
| LOC114260538 | 1.575226 | 1.806547 | 1.538459 | 2.43926  | 3.507167 | 3.688502 | -1.09904 | 1.365941 | 47.17787 | 8.43E-10 | 3.8E-09  |
| LOC114260583 | 0.496924 | 0.201433 | 0.393114 | 0.505859 | 0.768143 | 0.901524 | -1.10829 | -0.1686  | 15.52767 | 0.000165 | 0.000402 |
| LOC114260603 | 2.423547 | 2.68061  | 2.709983 | 1.208609 | 0.767434 | 0.972747 | 1.318206 | 1.379942 | 62.00497 | 7.81E-12 | 4.23E-11 |
| LOC114260611 | 3.618724 | 3.274973 | 4.050362 | 10.82021 | 10.50412 | 10.36549 | -1.63575 | 2.687944 | 247.4455 | 1.9E-27  | 3.67E-26 |
| LOC114260613 | 0.391229 | 0.330392 | 0.459168 | 0.210122 | 0.139991 | 0.195529 | 1.018336 | 0.090587 | 15.22672 | 0.000185 | 0.000447 |
| LOC114260624 | 0.513848 | 0.392615 | 0.625077 | 13.0438  | 10.84812 | 13.77152 | -4.71313 | 3.460992 | 1783.779 | 9.81E-52 | 1.2E-49  |
| LOC114260628 | 0.972048 | 0.851296 | 1.06803  | 0.458114 | 0.412232 | 0.445328 | 1.031149 | 0.339232 | 19.2139  | 3.19E-05 | 8.61E-05 |
| LOC114260676 | 1.072864 | 1.155519 | 1.025044 | 0        | 0        | 0        | 8.170759 | -0.28632 | 119.7091 | 4.91E-18 | 4.48E-17 |
| LOC114260663 | 0.6993   | 0.746506 | 0.718458 | 0.313674 | 0.220979 | 0.249641 | 1.374094 | 0.784695 | 44.59969 | 2.01E-09 | 8.73E-09 |
| LOC114260667 | 1.395692 | 1.19286  | 1.237889 | 0.366812 | 0.409156 | 0.34667  | 1.659908 | 0.658882 | 56.54368 | 4.13E-11 | 2.1E-10  |
| LOC114260727 | 2.842504 | 3.067984 | 2.848079 | 0.803186 | 1.096163 | 1.052592 | 1.441575 | 2.023657 | 112.1998 | 1.91E-17 | 1.65E-16 |
| LOC114260770 | 12.2049  | 11.75237 | 10.21937 | 4.81979  | 4.698499 | 5.263697 | 1.101311 | 2.558721 | 97.47409 | 5.8E-16  | 4.47E-15 |

|              |          |          |          |          |          |          |          |          |          |          |          |
|--------------|----------|----------|----------|----------|----------|----------|----------|----------|----------|----------|----------|
| LOC114260799 | 0.028031 | 0        | 0        | 1.681536 | 1.323985 | 1.232832 | -6.69071 | -0.36088 | 153.6174 | 4.3E-21  | 5.05E-20 |
| LOC114260836 | 1.750493 | 1.950939 | 1.511196 | 0.714345 | 0.766979 | 0.785593 | 1.086116 | 1.132991 | 37.01536 | 2.88E-08 | 1.12E-07 |
| LOC114260838 | 9.161669 | 8.36994  | 8.650871 | 3.941755 | 3.92818  | 3.805032 | 1.060846 | 4.559225 | 352.0828 | 1.05E-32 | 3.04E-31 |
| LOC114260819 | 0.558498 | 0.914716 | 0.864681 | 0.138443 | 0.327016 | 0.139563 | 1.785271 | -0.55482 | 23.20205 | 5.94E-06 | 1.77E-05 |
| LOC114260851 | 8.804135 | 8.462021 | 9.753637 | 2.608443 | 1.98418  | 2.540416 | 1.822002 | 2.819706 | 289.4771 | 9.84E-30 | 2.29E-28 |
| LOC114260879 | 0.077265 | 0.087001 | 0.042447 | 2.177047 | 2.432964 | 2.44245  | -5.08182 | -0.04754 | 173.7999 | 1.2E-22  | 1.6E-21  |
| LOC114260955 | 1.532447 | 1.709846 | 1.484774 | 0.227922 | 0.338977 | 0.172325 | 2.557596 | 1.053127 | 140.31   | 5.39E-20 | 5.77E-19 |
| LOC114260937 | 2.847259 | 3.087266 | 3.215302 | 0.143772 | 0.037734 | 0.144936 | 4.678161 | 0.93977  | 246.9554 | 2.03E-27 | 3.91E-26 |
| LOC114260962 | 5.538047 | 4.68706  | 5.229818 | 0.92118  | 1.217478 | 1.243707 | 2.066172 | 2.39866  | 258.6233 | 4.4E-28  | 8.99E-27 |
| LOC114260987 | 0.021213 | 0.035829 | 0.011654 | 0.616992 | 0.622429 | 0.641422 | -4.79123 | -0.08066 | 161.2974 | 1.06E-21 | 1.31E-20 |
| LOC114261036 | 1.130679 | 1.374185 | 1.400079 | 2.218497 | 3.005472 | 2.960009 | -1.19373 | 1.790902 | 72.94889 | 3.32E-13 | 2.03E-12 |
| LOC114261041 | 0.727292 | 0.796796 | 0.885496 | 0.285857 | 0.337611 | 0.351207 | 1.174975 | -0.06    | 17.93518 | 5.55E-05 | 0.000145 |
| LOC114261091 | 1.95672  | 1.857035 | 2.05779  | 4.624058 | 4.481019 | 4.533418 | -1.31784 | 1.837631 | 96.40145 | 7.51E-16 | 5.73E-15 |
| LOC114261113 | 5.310883 | 4.16003  | 6.596413 | 17.62948 | 16.69008 | 17.61347 | -1.79182 | 1.59313  | 138.3135 | 7.98E-20 | 8.44E-19 |
| LOC114261120 | 0.314827 | 0.425394 | 0.345914 | 0.981086 | 1.017091 | 1.026114 | -1.5889  | 1.232795 | 89.08181 | 4.6E-15  | 3.31E-14 |
| LOC114261137 | 1.087621 | 1.15262  | 1.124719 | 0        | 0        | 0        | 7.764683 | -0.63714 | 89.2601  | 5.38E-15 | 3.85E-14 |
| LOC114261128 | 4.342292 | 4.752963 | 4.349429 | 1.578702 | 1.271925 | 1.637743 | 1.477936 | 2.176494 | 129.8229 | 4.4E-19  | 4.38E-18 |
| LOC114261110 | 0.123094 | 0.083162 | 0.108199 | 0.984559 | 1.550418 | 1.387283 | -3.71169 | -0.15207 | 118.3274 | 4.95E-18 | 4.52E-17 |
| LOC114261191 | 21.30414 | 22.65154 | 23.57311 | 6.079612 | 5.792127 | 6.113492 | 1.803052 | 4.662234 | 968.6419 | 1.19E-49 | 1.2E-47  |
| LOC114261201 | 1.334521 | 1.502668 | 1.231687 | 0        | 0        | 0.036683 | 6.172184 | -0.16377 | 121.1259 | 2.71E-18 | 2.54E-17 |
| LOC114261238 | 2.556474 | 2.39407  | 2.82281  | 0.943246 | 0.797023 | 0.834919 | 1.495992 | 2.060315 | 123.5627 | 1.62E-18 | 1.54E-17 |
| LOC114261212 | 0        | 0.151089 | 0.105308 | 2.717958 | 2.469264 | 2.7663   | -5.06275 | 1.125396 | 346.6875 | 3.52E-29 | 7.86E-28 |
| LOC114261332 | 25.51165 | 24.81004 | 25.13965 | 10.64768 | 10.00467 | 10.81771 | 1.156893 | 5.536111 | 827.7039 | 7.01E-47 | 5.64E-45 |
| LOC114261335 | 10.53108 | 10.15559 | 10.76899 | 5.117603 | 4.178666 | 5.087366 | 1.027591 | 2.163094 | 67.74597 | 1.45E-12 | 8.34E-12 |
| LOC114261390 | 0.527873 | 0.392898 | 0.511183 | 0.992107 | 0.998849 | 0.90996  | -1.11323 | 1.31715  | 48.55073 | 5.35E-10 | 2.46E-09 |
| LOC114261394 | 4.420933 | 4.205519 | 3.824555 | 1.616531 | 1.63646  | 1.431732 | 1.309143 | 1.792772 | 82.63958 | 2.42E-14 | 1.63E-13 |

|              |          |          |          |          |          |          |          |          |          |          |          |
|--------------|----------|----------|----------|----------|----------|----------|----------|----------|----------|----------|----------|
| LOC114261429 | 0.839922 | 0.88737  | 0.93425  | 0.131948 | 0.118733 | 0.071259 | 2.9527   | 0.636604 | 127.4634 | 7.15E-19 | 7.02E-18 |
| LOC114261458 | 0.626331 | 0.835849 | 0.688176 | 1.518078 | 1.660116 | 1.498481 | -1.23114 | 0.61504  | 36.14484 | 3.95E-08 | 1.51E-07 |
| LOC114261465 | 1.648255 | 1.998696 | 1.764571 | 4.532764 | 3.871399 | 4.879241 | -1.40168 | 1.186247 | 68.37078 | 1.21E-12 | 7.02E-12 |
| LOC114261649 | 3.37203  | 3.047192 | 3.044227 | 1.249375 | 1.506315 | 0.915096 | 1.26701  | 1.656552 | 68.24778 | 1.25E-12 | 7.26E-12 |
| LOC114261654 | 1.264808 | 1.424171 | 1.755407 | 3.267276 | 3.14422  | 2.775263 | -1.14971 | 1.654242 | 63.09252 | 5.65E-12 | 3.1E-11  |
| LOC114261622 | 3.5366   | 3.446586 | 3.77219  | 1.353454 | 1.480089 | 1.421258 | 1.22567  | 1.894954 | 79.6405  | 5.35E-14 | 3.51E-13 |
| LOC114261733 | 0.364518 | 0.397416 | 0.400511 | 0.115697 | 0.082815 | 0.10338  | 1.843019 | 0.456049 | 57.40147 | 3.17E-11 | 1.62E-10 |
| LOC114261775 | 14.90646 | 14.23214 | 14.18954 | 32.92465 | 32.83896 | 33.73661 | -1.30445 | 4.99108  | 786.3238 | 5.5E-46  | 4.2E-44  |
| LOC114261779 | 1.568692 | 1.8485   | 2.004172 | 0        | 0        | 0        | 8.257453 | -0.20865 | 126.2991 | 1.24E-18 | 1.19E-17 |
| LOC114261781 | 3.013349 | 3.010221 | 3.005271 | 0.758455 | 0.6193   | 0.615922 | 2.085168 | 1.870269 | 192.0261 | 5.96E-24 | 8.89E-23 |
| LOC114261782 | 0.197885 | 0.086651 | 0.205345 | 0.35972  | 0.534992 | 0.604385 | -1.72541 | -0.05438 | 38.91995 | 1.5E-08  | 5.99E-08 |
| LOC114261808 | 2.549364 | 2.698344 | 2.857115 | 5.839205 | 5.03546  | 4.870346 | -1.05479 | 2.255622 | 79.65958 | 5.32E-14 | 3.49E-13 |
| LOC114261809 | 156.3627 | 151.0914 | 155.1153 | 300.6726 | 289.3147 | 295.5821 | -1.04226 | 7.82918  | 1317.692 | 1.13E-22 | 1.51E-21 |
| LOC114261827 | 0.528658 | 0.496056 | 0.629263 | 1.601675 | 1.261105 | 1.574272 | -1.51105 | -0.42899 | 24.58993 | 3.37E-06 | 1.03E-05 |
| LOC114261847 | 2.699417 | 2.56672  | 2.087158 | 1.054109 | 0.80135  | 1.016836 | 1.259856 | 1.408139 | 57.85163 | 2.76E-11 | 1.42E-10 |
| LOC114261858 | 0.537432 | 0.546313 | 0.516686 | 1.302606 | 1.068363 | 1.046415 | -1.185   | 1.781779 | 73.92481 | 2.53E-13 | 1.56E-12 |
| LOC114261900 | 5.497326 | 5.662682 | 5.50324  | 12.88007 | 12.29782 | 13.06826 | -1.30381 | 3.781768 | 392.9373 | 2.02E-34 | 6.66E-33 |
| LOC114261948 | 1.602429 | 1.562287 | 1.610356 | 0.355235 | 0.335641 | 0.537165 | 1.826778 | 0.718591 | 68.49394 | 1.17E-12 | 6.79E-12 |
| LOC114261949 | 1145.256 | 1114.002 | 1130.174 | 2702.747 | 2766.604 | 2735.033 | -1.38094 | 10.65608 | 6616.129 | 1.38E-27 | 2.71E-26 |
| LOC114261952 | 0.112104 | 0.17672  | 0.197077 | 1.222708 | 1.54035  | 1.170973 | -3.11426 | 0.031036 | 109.4024 | 3.57E-17 | 3.03E-16 |
| LOC114261959 | 1.590055 | 1.659394 | 1.661838 | 0.634486 | 0.610589 | 0.799526 | 1.139995 | -0.00716 | 17.77513 | 5.95E-05 | 0.000155 |
| LOC114261978 | 1.032727 | 0.830606 | 0.830762 | 0.502852 | 0.422324 | 0.304153 | 1.056095 | 0.212572 | 17.78244 | 5.93E-05 | 0.000154 |
| LOC114261986 | 4.558555 | 5.044678 | 4.779051 | 1.115966 | 0.97215  | 0.95146  | 2.144242 | 2.746511 | 361.9754 | 3.92E-33 | 1.17E-31 |
| LOC114262078 | 2.180285 | 2.051937 | 2.216796 | 1.005631 | 0.838376 | 1.118128 | 1.013336 | 0.626049 | 23.12913 | 6.12E-06 | 1.82E-05 |
| LOC114262083 | 7.842023 | 8.186507 | 8.453074 | 40.00239 | 39.98833 | 37.44046 | -2.36776 | 5.996714 | 3803.625 | 1.46E-73 | 8.92E-71 |
| LOC114262084 | 0.402078 | 0.503043 | 0.29452  | 0.040606 | 0.015986 | 0.138154 | 2.424483 | -0.44513 | 37.79713 | 3.15E-08 | 1.22E-07 |



|              |          |          |          |          |          |          |          |          |          |          |          |
|--------------|----------|----------|----------|----------|----------|----------|----------|----------|----------|----------|----------|
| LOC114262109 | 0.214329 | 0.254379 | 0.299139 | 0.02106  | 0.016582 | 0.023884 | 3.474167 | -0.26769 | 74.99304 | 1.88E-13 | 1.18E-12 |
| LOC114262123 | 0.266668 | 0.312278 | 0.281279 | 0.465365 | 0.580153 | 0.586414 | -1.04432 | 0.302286 | 21.17188 | 1.38E-05 | 3.93E-05 |
| LOC114262147 | 5.933527 | 5.438777 | 4.633633 | 11.58836 | 11.51064 | 12.19886 | -1.24386 | 3.415884 | 261.8756 | 3.16E-28 | 6.54E-27 |
| LOC114262203 | 0.960367 | 0.602732 | 0.830318 | 2.3754   | 2.523792 | 1.947435 | -1.60359 | 1.588909 | 108.3478 | 5.91E-17 | 4.92E-16 |
| LOC114262195 | 0.524191 | 0.489054 | 0.724052 | 0.108901 | 0.107181 | 0.205842 | 1.884248 | -0.2744  | 32.49814 | 1.53E-07 | 5.47E-07 |
| LOC114262281 | 6.172898 | 5.889778 | 5.765057 | 0.634885 | 0.755644 | 0.569323 | 3.077685 | 3.595167 | 1175.098 | 4.2E-53  | 5.71E-51 |
| LOC114262362 | 2.621924 | 2.910305 | 2.839858 | 1.061663 | 0.818132 | 0.768534 | 1.572832 | 2.173854 | 142.047  | 3.84E-20 | 4.16E-19 |
| LOC114262367 | 11.49791 | 10.89534 | 11.35351 | 5.266004 | 4.730458 | 4.939207 | 1.074134 | 4.606306 | 371.1063 | 1.6E-33  | 4.88E-32 |
| LOC114262372 | 0.785877 | 1.050814 | 1.079345 | 2.232164 | 1.862983 | 1.856439 | -1.12767 | 0.898381 | 36.68464 | 3.24E-08 | 1.25E-07 |
| LOC114262403 | 0.114359 | 0.144863 | 0.188476 | 1.741024 | 1.452664 | 1.689625 | -3.5372  | 0.927172 | 245.4833 | 2.47E-27 | 4.75E-26 |
| LOC114262421 | 0        | 0.124693 | 0.040558 | 0.469711 | 0.545947 | 0.422779 | -3.24044 | -0.54078 | 63.40349 | 5.33E-11 | 2.67E-10 |
| LOC114262416 | 63.43664 | 62.67805 | 62.49667 | 15.31239 | 16.71746 | 16.88844 | 1.836563 | 4.758726 | 1091.03  | 9.03E-52 | 1.11E-49 |
| LOC114262434 | 1.091233 | 1.06425  | 0.896877 | 0        | 0        | 0.023619 | 6.569368 | 0.938472 | 283.7206 | 1.95E-29 | 4.45E-28 |
| LOC114262440 | 1.009256 | 1.001132 | 1.557756 | 0.393139 | 0.447119 | 0.363294 | 1.448985 | 0.12961  | 28.5519  | 6.94E-07 | 2.31E-06 |
| LOC114262450 | 2.846179 | 2.374634 | 2.741023 | 7.589344 | 7.362129 | 8.177049 | -1.64229 | 4.212324 | 677.8957 | 2E-43    | 1.29E-41 |
| LOC114262516 | 1.899676 | 2.229572 | 2.054123 | 0.730851 | 0.71931  | 0.925562 | 1.260275 | 2.118892 | 92.7595  | 1.83E-15 | 1.36E-14 |
| LOC114262550 | 68.61939 | 67.6713  | 66.442   | 144.4585 | 143.182  | 145.8035 | -1.20148 | 8.076573 | 1886.233 | 2.79E-28 | 5.8E-27  |
| LOC114262572 | 0.092814 | 0.243852 | 0.339927 | 2.587018 | 2.612586 | 2.423697 | -3.59565 | 0.456911 | 173.5409 | 1.25E-22 | 1.67E-21 |
| LOC114262615 | 1.973599 | 2.421008 | 2.062696 | 0.700029 | 1.079393 | 0.882118 | 1.146906 | 1.556255 | 53.24093 | 1.17E-10 | 5.71E-10 |
| LOC114262637 | 0.807365 | 0.826447 | 0.842284 | 0.311319 | 0.23345  | 0.235379 | 1.577205 | 1.068314 | 69.55853 | 8.62E-13 | 5.07E-12 |
| LOC114262678 | 0.509794 | 0.636649 | 0.631422 | 0.235891 | 0.225533 | 0.318482 | 1.059508 | 0.564021 | 23.37893 | 5.52E-06 | 1.65E-05 |
| LOC114262747 | 1.525746 | 1.181116 | 1.073944 | 0.910066 | 0.375339 | 0.360419 | 1.17393  | 0.298316 | 20.85566 | 1.8E-05  | 5.04E-05 |
| LOC114262733 | 5.494674 | 5.597753 | 5.438296 | 1.704359 | 2.246994 | 2.367454 | 1.260797 | 2.411329 | 112.843  | 1.65E-17 | 1.44E-16 |
| LOC114262792 | 10.15119 | 10.91534 | 10.65112 | 3.657362 | 4.057736 | 4.713444 | 1.230335 | 2.295493 | 101.7631 | 2.09E-16 | 1.66E-15 |
| LOC114262796 | 6.322764 | 5.254808 | 5.513559 | 1.68756  | 1.005524 | 1.034524 | 2.130169 | 2.079853 | 209.2114 | 7.3E-25  | 1.17E-23 |
| LOC114262805 | 1.02097  | 0.781288 | 0.958416 | 0.018019 | 0.028375 | 0.013624 | 5.317536 | 0.632296 | 213.2926 | 2.28E-25 | 3.83E-24 |

|              |          |          |          |          |          |          |          |          |          |          |          |
|--------------|----------|----------|----------|----------|----------|----------|----------|----------|----------|----------|----------|
| LOC114262820 | 2.610574 | 2.330604 | 2.15126  | 0.949112 | 0.960813 | 1.281419 | 1.03394  | 1.513502 | 43.91939 | 2.53E-09 | 1.09E-08 |
| LOC114262880 | 9.100817 | 9.813567 | 8.778017 | 2.451911 | 1.697189 | 1.955673 | 2.095068 | 3.506176 | 597.6063 | 1.06E-38 | 4.89E-37 |
| LOC114262898 | 1.329768 | 1.2032   | 1.095804 | 0.388491 | 0.407847 | 0.489544 | 1.375002 | 0.187221 | 28.66013 | 6.65E-07 | 2.22E-06 |
| LOC114262904 | 2.029593 | 2.47352  | 2.990822 | 0.737888 | 0.478461 | 0.721981 | 1.845448 | 1.054824 | 83.17011 | 2.32E-14 | 1.57E-13 |
| LOC114262960 | 1.913884 | 1.788215 | 1.386995 | 0.370117 | 0.291418 | 0.223867 | 2.429432 | -0.2457  | 49.34841 | 4.11E-10 | 1.91E-09 |
| LOC114262918 | 1.091871 | 1.084803 | 1.270253 | 0.077836 | 0.168536 | 0.279536 | 2.526543 | 0.979602 | 126.12   | 1.32E-18 | 1.27E-17 |
| LOC114262919 | 0.747587 | 0.987474 | 0.821405 | 0.418147 | 0.308658 | 0.355667 | 1.140074 | 0.445416 | 24.37801 | 3.67E-06 | 1.12E-05 |
| LOC114262963 | 4.558504 | 4.221837 | 4.228055 | 0.14349  | 0.367182 | 0.352587 | 3.73982  | 1.852238 | 388.9559 | 2.93E-34 | 9.51E-33 |
| LOC114262927 | 9.263699 | 8.866268 | 9.276896 | 1.202839 | 1.231198 | 1.273203 | 2.775615 | 3.545625 | 1044.839 | 5.36E-51 | 6.22E-49 |
| LOC114262930 | 0.784002 | 0.669207 | 0.666902 | 0.183894 | 0.307682 | 0.208555 | 1.469906 | 0.288941 | 34.19377 | 8.1E-08  | 2.99E-07 |
| LOC114262994 | 2.645051 | 1.998114 | 2.464775 | 0.060864 | 0.047922 | 0        | 5.830478 | 0.268971 | 165.8557 | 4.74E-22 | 6.02E-21 |
| LOC114263027 | 0.753064 | 0.798792 | 0.623565 | 0        | 0        | 0.015    | 6.560068 | 0.177841 | 161.2989 | 1.06E-21 | 1.31E-20 |
| LOC114263011 | 1.29179  | 1.734274 | 1.310163 | 0.225793 | 0.320007 | 0.239001 | 2.325696 | 0.193268 | 64.77405 | 3.44E-12 | 1.92E-11 |
| LOC114263013 | 0.480854 | 0.87232  | 0.572362 | 0        | 0.057353 | 0        | 4.734781 | -0.21474 | 86.05079 | 2.59E-13 | 1.6E-12  |
| LOC114263014 | 3.215954 | 2.752079 | 2.809135 | 0        | 0        | 0        | 10.13951 | 1.506456 | 484.7546 | 2.37E-37 | 9.8E-36  |
| LOC114263031 | 4.921364 | 4.563543 | 4.857903 | 2.487703 | 2.147073 | 1.880877 | 1.048217 | 2.017002 | 63.07006 | 5.69E-12 | 3.12E-11 |
| LOC114263059 | 15.77    | 15.78932 | 17.42082 | 35.17524 | 30.37998 | 33.85875 | -1.12387 | 4.147314 | 325.3224 | 1.73E-31 | 4.56E-30 |
| LOC114263127 | 12.44891 | 12.95883 | 13.12602 | 4.714561 | 4.547306 | 4.455671 | 1.386354 | 4.005884 | 444.2078 | 2.21E-36 | 8.59E-35 |
| LOC114263128 | 1.421154 | 1.373637 | 1.547662 | 0.434378 | 0.48602  | 0.725981 | 1.263939 | 1.311603 | 54.51395 | 7.81E-11 | 3.87E-10 |
| LOC114263165 | 8.264638 | 7.964564 | 7.25755  | 3.499715 | 3.227504 | 3.72783  | 1.062403 | 3.994948 | 256.6698 | 5.67E-28 | 1.15E-26 |
| LOC114263187 | 4.747873 | 4.217773 | 5.033185 | 1.431236 | 1.434245 | 1.016531 | 1.756957 | 1.938816 | 146.1483 | 1.75E-20 | 1.94E-19 |
| LOC114263241 | 1.08264  | 1.300321 | 1.070588 | 6.363351 | 6.50821  | 6.249518 | -2.57245 | 1.679297 | 272.2223 | 7.92E-29 | 1.72E-27 |
| LOC114263263 | 2.823976 | 2.406665 | 2.956806 | 0.543545 | 0.538924 | 0.608827 | 2.162541 | 2.181731 | 243.7086 | 3.13E-27 | 5.97E-26 |
| LOC114263267 | 0.325767 | 0.23984  | 0.481835 | 0.865504 | 0.645602 | 0.843808 | -1.26095 | 0.497487 | 32.78378 | 1.37E-07 | 4.94E-07 |
| LOC114263346 | 2.132905 | 2.345794 | 2.316262 | 0.360674 | 0.212987 | 0.340868 | 2.787237 | 0.739043 | 128.5102 | 5.76E-19 | 5.69E-18 |
| LOC114263337 | 6.93223  | 7.35291  | 6.989367 | 2.42675  | 2.221525 | 2.321123 | 1.507313 | 4.127385 | 536.5989 | 1.77E-39 | 8.59E-38 |

|              |          |          |          |          |          |          |          |          |          |          |          |
|--------------|----------|----------|----------|----------|----------|----------|----------|----------|----------|----------|----------|
| LOC114263383 | 2.809407 | 2.413546 | 3.155408 | 8.587325 | 7.83366  | 7.236265 | -1.59331 | 2.975119 | 280.5648 | 2.86E-29 | 6.43E-28 |
| LOC114263394 | 2.548701 | 2.671151 | 2.455704 | 5.916091 | 5.359657 | 5.254401 | -1.20573 | 2.655448 | 137.154  | 1E-19    | 1.06E-18 |
| LOC114263408 | 5.582694 | 4.999472 | 5.560003 | 2.017799 | 1.401836 | 1.794819 | 1.538719 | 1.748964 | 105.7384 | 8.26E-17 | 6.8E-16  |
| LOC114263451 | 0.380977 | 0.2962   | 0.468428 | 0.032979 | 0.038949 | 0        | 3.87427  | -0.34551 | 73.8573  | 2.79E-13 | 1.72E-12 |
| LOC114263421 | 9.402116 | 8.855179 | 9.132758 | 4.175531 | 3.649874 | 4.735489 | 1.017206 | 3.364468 | 165.3693 | 5.16E-22 | 6.53E-21 |
| LOC114263423 | 6.714093 | 6.606047 | 6.709606 | 0.058119 | 0.114403 | 0.065913 | 6.220035 | 2.669264 | 1021.003 | 1.38E-50 | 1.52E-48 |
| LOC114263433 | 41.72554 | 41.85387 | 43.02235 | 0.84926  | 0.585094 | 0.601969 | 5.872133 | 4.432124 | 3641.116 | 4.77E-74 | 3.09E-71 |
| LOC114263376 | 1.223776 | 0.823202 | 1.204913 | 2.542406 | 2.320274 | 2.664919 | -1.30758 | 1.796422 | 87.53628 | 6.81E-15 | 4.82E-14 |
| LOC114263455 | 0.023727 | 0.026717 | 0        | 0.862635 | 0.611289 | 0.913097 | -5.36423 | -0.87722 | 93.28797 | 1.61E-15 | 1.2E-14  |
| LOC114263479 | 0.526698 | 0.70089  | 0.613778 | 1.479683 | 1.416339 | 1.403914 | -1.32953 | 0.988991 | 54.37901 | 8.15E-11 | 4.03E-10 |
| LOC114263486 | 593.4877 | 547.168  | 617.4758 | 226.3944 | 229.3722 | 237.0582 | 1.237516 | 8.900582 | 2215.348 | 1.81E-26 | 3.3E-25  |
| LOC114263489 | 0.374263 | 0.4455   | 0.340723 | 0.019438 | 0.045915 | 0.161664 | 2.124704 | -0.39752 | 33.43835 | 1.24E-07 | 4.51E-07 |
| LOC114263498 | 11.49601 | 11.46262 | 11.35528 | 1.020258 | 0.747916 | 0.851185 | 3.619729 | 3.246956 | 1115.046 | 3.68E-52 | 4.62E-50 |
| LOC114263519 | 1.096022 | 1.170008 | 1.37628  | 0.077625 | 0.305596 | 0.195633 | 2.470112 | 0.678298 | 97.70744 | 6.92E-16 | 5.29E-15 |
| LOC114263561 | 3.494568 | 3.289814 | 3.430487 | 0.468627 | 0.450977 | 0.590525 | 2.632382 | 1.110625 | 159.1579 | 1.56E-21 | 1.9E-20  |
| LOC114263566 | 1.540917 | 1.41376  | 1.567657 | 4.87601  | 5.064485 | 4.784741 | -1.80586 | 2.372404 | 237.3659 | 7.4E-27  | 1.38E-25 |
| LOC114263602 | 1.162251 | 1.085257 | 1.090134 | 2.525012 | 2.596715 | 2.493499 | -1.2906  | 0.996689 | 52.72254 | 1.38E-10 | 6.7E-10  |
| LOC114263592 | 18.95969 | 19.31086 | 19.90697 | 4.47552  | 5.240633 | 4.30929  | 1.942992 | 4.090088 | 786.8951 | 5.34E-46 | 4.09E-44 |
| LOC114263644 | 0.385428 | 0.433991 | 0.433111 | 0.859876 | 0.927792 | 0.734402 | -1.11245 | 1.151639 | 43.05689 | 3.41E-09 | 1.45E-08 |
| LOC114263655 | 0.881418 | 1.116534 | 0.605282 | 3.605087 | 3.311612 | 1.892845 | -1.82794 | 0.105533 | 46.57765 | 1.36E-09 | 5.99E-09 |
| LOC114263654 | 1.04378  | 0.970895 | 0.897531 | 3.217341 | 2.435795 | 2.494907 | -1.56593 | 1.319396 | 90.35618 | 3.34E-15 | 2.43E-14 |
| LOC114263680 | 13.4231  | 13.5721  | 12.59343 | 4.939917 | 4.595285 | 4.337328 | 1.412436 | 4.599406 | 589.0991 | 4.86E-41 | 2.62E-39 |
| LOC114263681 | 0.897553 | 0.631652 | 0.842362 | 2.345413 | 2.288302 | 2.492895 | -1.68627 | 2.37755  | 202.3181 | 1.19E-24 | 1.87E-23 |
| LOC114263684 | 5.195429 | 4.414122 | 4.852169 | 1.416654 | 1.352032 | 2.077264 | 1.455713 | 2.061665 | 112.7183 | 1.7E-17  | 1.48E-16 |
| LOC114263690 | 0.292027 | 0.411027 | 0.641723 | 0.696743 | 0.862074 | 0.953233 | -1.03524 | 0.164147 | 17.50239 | 6.8E-05  | 0.000176 |
| LOC114263706 | 159.6053 | 146.7555 | 156.7764 | 43.5201  | 50.57701 | 50.36541 | 1.572468 | 6.554204 | 1080.541 | 6.22E-17 | 5.17E-16 |

|              |          |          |          |          |          |          |          |          |          |          |          |
|--------------|----------|----------|----------|----------|----------|----------|----------|----------|----------|----------|----------|
| LOC114263815 | 0.4968   | 0.298987 | 0.404686 | 2.896128 | 2.48873  | 2.919566 | -2.87691 | 2.507274 | 504.6236 | 2.62E-38 | 1.16E-36 |
| LOC114263889 | 5.057369 | 5.51663  | 6.656514 | 2.202584 | 2.412856 | 3.040995 | 1.041512 | 1.298216 | 37.81567 | 2.16E-08 | 8.47E-08 |
| LOC114263901 | 1.634902 | 1.660416 | 2.254224 | 9.38207  | 7.341244 | 6.917263 | -2.18138 | 2.217295 | 265.1965 | 2.97E-27 | 5.69E-26 |
| LOC114263914 | 0.920187 | 0.809848 | 1.057533 | 0        | 0        | 0        | 9.087776 | 0.53182  | 228.8129 | 4.27E-26 | 7.54E-25 |
| LOC114263930 | 0.900214 | 1.138121 | 1.058514 | 0.315802 | 0.316466 | 0.260475 | 1.684005 | 0.451909 | 48.74689 | 5.01E-10 | 2.31E-09 |
| LOC114263956 | 2.971922 | 3.305815 | 3.206004 | 1.178711 | 1.263216 | 1.039719 | 1.3392   | 1.88333  | 90.94366 | 2.88E-15 | 2.11E-14 |
| LOC114263962 | 0.547429 | 0.644422 | 0.710844 | 0.361865 | 0.267113 | 0.222296 | 1.076949 | 0.262312 | 19.03144 | 3.45E-05 | 9.27E-05 |
| LOC114263978 | 0.243358 | 0.209545 | 0.110101 | 1.275101 | 1.147396 | 1.318212 | -2.80982 | 0.625695 | 144.9192 | 2.21E-20 | 2.44E-19 |
| LOC114264005 | 1.783047 | 2.158285 | 2.252974 | 0.810315 | 0.765618 | 0.857717 | 1.228222 | 0.092269 | 21.7147  | 1.1E-05  | 3.17E-05 |
| LOC114264064 | 0.727457 | 0.614336 | 0.768545 | 0.330597 | 0.380439 | 0.2115   | 1.098812 | 0.239774 | 19.41271 | 2.93E-05 | 7.95E-05 |
| LOC114264032 | 1.706725 | 1.323185 | 1.567832 | 0.406888 | 0.680786 | 0.192272 | 1.740394 | 0.211414 | 39.9057  | 1.13E-08 | 4.58E-08 |
| LOC114264068 | 5.478816 | 5.514833 | 5.198921 | 1.207213 | 0.752494 | 0.912737 | 2.412229 | 1.822135 | 225.9018 | 3.66E-26 | 6.51E-25 |
| LOC114264040 | 2.006552 | 1.684621 | 1.856575 | 0.57593  | 0.755779 | 0.580591 | 1.422373 | 1.152245 | 61.28237 | 9.71E-12 | 5.21E-11 |
| LOC114264041 | 7.453921 | 6.766529 | 6.856689 | 0        | 0        | 0.019854 | 9.42972  | 2.866787 | 1281.166 | 1.16E-54 | 1.74E-52 |
| LOC114264042 | 3.748955 | 3.240144 | 3.740618 | 26.85451 | 25.11796 | 25.40074 | -2.95106 | 4.485188 | 2139.296 | 4.46E-64 | 1.43E-61 |
| LOC114264079 | 0.920107 | 0.982078 | 0.947774 | 0.331033 | 0.137181 | 0.289803 | 1.827077 | 0.989069 | 79.15005 | 6.1E-14  | 3.97E-13 |
| LOC114264080 | 1.888063 | 1.849581 | 1.51438  | 5.148243 | 5.080454 | 4.904462 | -1.62663 | 2.465233 | 203.3238 | 1.02E-24 | 1.61E-23 |
| LOC114264112 | 0.988836 | 1.054826 | 1.343799 | 0.189213 | 0.335206 | 0.679528 | 1.307025 | -0.01896 | 20.56521 | 1.88E-05 | 5.24E-05 |
| LOC114264115 | 0.826604 | 0.648708 | 0.908225 | 1.957958 | 1.649186 | 1.549207 | -1.19665 | 0.641705 | 34.55668 | 7.08E-08 | 2.63E-07 |
| LOC114264141 | 2.494361 | 2.49154  | 3.359517 | 1.023875 | 0.575832 | 0.884709 | 1.655395 | 0.534243 | 48.81386 | 4.9E-10  | 2.26E-09 |
| LOC114264180 | 3.235949 | 2.831388 | 2.581681 | 0.599478 | 0.649012 | 0.623215 | 2.096941 | 1.41022  | 139.3426 | 6.51E-20 | 6.94E-19 |
| LOC114264192 | 28.7986  | 28.55857 | 30.07935 | 57.64147 | 57.00527 | 60.00279 | -1.10382 | 5.92902  | 950.0623 | 3.02E-49 | 2.97E-47 |
| LOC114264281 | 0.207626 | 0.187029 | 0.288962 | 1.132282 | 0.812275 | 1.331687 | -2.35721 | 0.558243 | 103.3475 | 1.44E-16 | 1.16E-15 |
| LOC114264359 | 0.333392 | 0.259891 | 0.281778 | 2.424187 | 2.642848 | 2.150079 | -3.12218 | 0.692589 | 179.5805 | 4.53E-23 | 6.3E-22  |
| LOC114264315 | 1.071626 | 1.224658 | 1.071998 | 0.145375 | 0.114463 | 0.021983 | 3.512348 | 0.333117 | 117.3474 | 6.13E-18 | 5.56E-17 |
| LOC114264351 | 0.259213 | 0.583746 | 0.142404 | 3.534019 | 3.47821  | 4.05248  | -3.59671 | 0.927786 | 229.3926 | 2.86E-25 | 4.77E-24 |

|              |          |          |          |          |          |          |          |          |          |          |          |
|--------------|----------|----------|----------|----------|----------|----------|----------|----------|----------|----------|----------|
| LOC114264326 | 5.311697 | 5.440072 | 5.26779  | 1.427367 | 1.67918  | 1.625131 | 1.643097 | 3.488565 | 436.9784 | 4.07E-36 | 1.55E-34 |
| LOC114264369 | 2.00001  | 1.501338 | 1.831246 | 0.242377 | 0.14313  | 0.412322 | 2.598182 | 0.049962 | 67.28766 | 1.65E-12 | 9.48E-12 |
| LOC114264385 | 8.838489 | 8.246444 | 8.583285 | 4.119107 | 3.547861 | 3.957439 | 1.042695 | 3.896262 | 250.1164 | 1.33E-27 | 2.62E-26 |
| LOC114264417 | 7.377816 | 6.772703 | 6.673873 | 2.746944 | 2.841393 | 2.769175 | 1.210677 | 2.323278 | 102.1286 | 1.91E-16 | 1.53E-15 |
| LOC114264419 | 2.141123 | 1.700319 | 1.832506 | 4.097031 | 3.80652  | 3.128617 | -1.04674 | 1.922607 | 61.65993 | 8.66E-12 | 4.67E-11 |
| LOC114264563 | 3.304268 | 2.426477 | 2.367742 | 9.923897 | 9.304523 | 9.576399 | -1.92239 | 2.394311 | 255.3528 | 6.72E-28 | 1.35E-26 |
| LOC114264461 | 0.223571 | 0.197014 | 0.160204 | 0.777484 | 0.570426 | 0.667991 | -1.87117 | 0.463618 | 68.55699 | 1.15E-12 | 6.68E-12 |
| LOC114264469 | 22.52523 | 21.24856 | 21.72156 | 9.311052 | 8.788877 | 9.921596 | 1.11853  | 3.962762 | 294.8466 | 5.25E-30 | 1.24E-28 |
| LOC114264503 | 2.304924 | 2.328172 | 2.755973 | 4.836916 | 4.778724 | 4.984763 | -1.09008 | 2.726569 | 119.4624 | 3.88E-18 | 3.58E-17 |
| LOC114264433 | 2.139004 | 1.837422 | 2.338098 | 0        | 0        | 0        | 10.20654 | 1.570674 | 500.2451 | 7.37E-38 | 3.19E-36 |
| LOC114264515 | 0.789031 | 1.089406 | 0.939187 | 0.017075 | 0.013444 | 0        | 6.316511 | 0.71457  | 234.9636 | 1.03E-26 | 1.9E-25  |
| LOC114264518 | 1.188634 | 1.229881 | 1.005975 | 0.262791 | 0.114952 | 0.154535 | 2.618468 | 0.427522 | 91.14402 | 2.74E-15 | 2.01E-14 |
| LOC114264519 | 1.38469  | 1.460164 | 1.207473 | 3.915518 | 3.271699 | 3.685402 | -1.52034 | 1.796863 | 119.2056 | 4.1E-18  | 3.77E-17 |
| LOC114264521 | 0.370786 | 0.272983 | 0.329052 | 0.959186 | 1.163464 | 1.195619 | -1.87461 | 0.642044 | 79.43335 | 5.65E-14 | 3.7E-13  |
| LOC114264552 | 1.088877 | 1.306034 | 1.404463 | 0.301211 | 0.304924 | 0.292804 | 1.956347 | 0.137071 | 48.98658 | 4.63E-10 | 2.14E-09 |
| LOC114264555 | 1.942306 | 1.593409 | 1.722518 | 0.479175 | 0.49643  | 0.400426 | 1.834501 | 1.318736 | 106.111  | 7.58E-17 | 6.26E-16 |
| LOC114264556 | 3.072545 | 3.237497 | 3.097186 | 0.256208 | 0.484151 | 0.193711 | 3.197135 | 0.965234 | 174.7927 | 1.01E-22 | 1.37E-21 |
| LOC114264622 | 3.504919 | 2.730305 | 3.366598 | 1.041851 | 1.79839  | 1.42394  | 1.041592 | 1.697518 | 47.62077 | 9.04E-10 | 4.06E-09 |
| LOC114264681 | 11.39881 | 10.29344 | 12.25567 | 2.769639 | 3.015317 | 2.817906 | 1.871066 | 3.49596  | 528.2652 | 3.22E-39 | 1.54E-37 |
| LOC114264686 | 60.60087 | 62.78504 | 60.5774  | 27.31278 | 26.9412  | 26.44394 | 1.084085 | 4.979725 | 515.8046 | 8E-39    | 3.69E-37 |
| LOC114264719 | 0.527926 | 0.359795 | 0.274763 | 1.767824 | 1.431695 | 1.756672 | -2.17021 | 1.174047 | 138.3716 | 8.64E-20 | 9.12E-19 |
| LOC114264723 | 3.15181  | 2.707855 | 3.50306  | 0.662362 | 0.86051  | 1.051662 | 1.72807  | 1.753588 | 124.7242 | 1.27E-18 | 1.22E-17 |
| LOC114264730 | 0.987639 | 0.993773 | 1.177514 | 9.817131 | 8.78236  | 9.935089 | -3.27698 | 2.953549 | 902.597  | 2.11E-48 | 1.93E-46 |
| LOC114264729 | 0.845901 | 0.780723 | 0.91419  | 19.93964 | 19.37169 | 21.9561  | -4.694   | 4.573999 | 3955.386 | 1.3E-75  | 9.59E-73 |
| LOC114264743 | 43.19133 | 40.25551 | 44.75836 | 423.9493 | 425.015  | 436.3962 | -3.43119 | 7.619033 | 10733.61 | 1.17E-94 | 9.27E-91 |
| LOC114264745 | 2.938186 | 2.692876 | 3.303384 | 12.48326 | 11.8827  | 10.28343 | -2.05192 | 2.706645 | 357.9659 | 5.84E-33 | 1.71E-31 |

|              |          |          |          |          |          |          |          |          |          |          |          |
|--------------|----------|----------|----------|----------|----------|----------|----------|----------|----------|----------|----------|
| LOC114264744 | 39.43249 | 38.83422 | 38.36841 | 183.7322 | 187.5697 | 195.8067 | -2.38689 | 6.486112 | 4614.833 | 1.55E-78 | 1.41E-75 |
| LOC114264758 | 1.541839 | 1.553359 | 1.486038 | 3.835395 | 4.181346 | 4.015143 | -1.49975 | 1.655871 | 108.9989 | 3.92E-17 | 3.31E-16 |
| LOC114264836 | 202.7358 | 188.6003 | 199.1276 | 84.06159 | 77.92187 | 79.66792 | 1.184957 | 5.842648 | 989.793  | 4.93E-50 | 5.12E-48 |
| LOC114264776 | 0.673763 | 0.654014 | 0.918983 | 2.555148 | 3.192337 | 2.746129 | -2.0317  | 2.244689 | 248.3825 | 2.9E-27  | 5.55E-26 |
| LOC114264777 | 2.79429  | 2.447172 | 2.93754  | 0.031355 | 0.024688 | 0.07112  | 5.779172 | 1.335244 | 377.8499 | 8.36E-34 | 2.61E-32 |
| LOC114264823 | 0.356609 | 0.535388 | 0.783643 | 1.62063  | 3.487815 | 3.104117 | -2.43601 | -0.17639 | 61.76559 | 1.21E-11 | 6.44E-11 |
| LOC114264795 | 1.608109 | 1.727155 | 1.413517 | 3.328013 | 2.691187 | 3.060256 | -1.03038 | 1.519743 | 47.84911 | 6.75E-10 | 3.07E-09 |
| LOC114264793 | 2.887748 | 3.106545 | 2.83083  | 15.94338 | 15.70312 | 16.20028 | -2.54435 | 4.763231 | 2050.843 | 2.71E-63 | 8.29E-61 |
| LOC114264826 | 11.95148 | 12.0751  | 11.75736 | 4.336712 | 4.93954  | 4.679533 | 1.245657 | 3.427801 | 259.9022 | 3.74E-28 | 7.68E-27 |
| LOC114264874 | 5.211612 | 6.396685 | 6.133292 | 1.57148  | 1.767615 | 1.357884 | 1.808378 | 2.208284 | 180.0479 | 4.19E-23 | 5.86E-22 |
| LOC114264878 | 1.852177 | 2.072178 | 2.008973 | 4.100744 | 3.296762 | 3.687901 | -1.00049 | 2.868026 | 109.9404 | 3.16E-17 | 2.7E-16  |
| LOC114264885 | 0.319662 | 0.503914 | 0.234151 | 1.084699 | 1.159075 | 1.259452 | -1.84001 | 0.164147 | 52.41908 | 1.52E-10 | 7.34E-10 |
| LOC114264886 | 81.40727 | 81.38368 | 78.49715 | 198.0043 | 194.3213 | 197.0729 | -1.3936  | 8.53499  | 2911.308 | 1.16E-34 | 3.89E-33 |
| LOC114264891 | 17.06436 | 17.27011 | 18.0797  | 37.79018 | 39.68912 | 40.62438 | -1.27953 | 4.682325 | 565.9731 | 2.28E-40 | 1.18E-38 |
| LOC114264956 | 30.72434 | 28.56033 | 27.45165 | 3.298913 | 4.892877 | 3.132262 | 2.821388 | 3.529301 | 880.9404 | 1.29E-38 | 5.86E-37 |
| LOC114264974 | 7.392999 | 6.559495 | 6.863418 | 1.6161   | 1.406407 | 1.028956 | 2.277972 | 2.426611 | 299.819  | 2.95E-30 | 7.12E-29 |
| LOC114264976 | 1.682093 | 2.029321 | 1.636964 | 5.329211 | 4.333617 | 3.996229 | -1.44438 | 2.014556 | 117.9146 | 5.42E-18 | 4.93E-17 |
| LOC114264957 | 0.538441 | 0.714549 | 0.718381 | 0.034957 | 0        | 0.02643  | 4.77047  | -0.64053 | 71.19562 | 5.42E-13 | 3.25E-12 |
| LOC114265026 | 0.410874 | 0.351609 | 0.370184 | 0        | 0.011762 | 0.022588 | 4.687177 | -0.26517 | 96.97316 | 6.54E-16 | 5.02E-15 |
| LOC114265028 | 3.486307 | 3.593632 | 3.53481  | 0.279595 | 0.27518  | 0.229009 | 3.653368 | 2.176442 | 491.7745 | 4.88E-38 | 2.14E-36 |
| LOC114265029 | 1.702875 | 1.7507   | 1.464277 | 0        | 0        | 0        | 8.102467 | -0.3467  | 113.4497 | 1.89E-17 | 1.64E-16 |
| LOC114265031 | 2.508635 | 2.017656 | 2.296952 | 5.157427 | 4.616471 | 4.966571 | -1.20663 | 1.885647 | 82.75696 | 2.34E-14 | 1.58E-13 |
| LOC114265034 | 0.872966 | 1.128581 | 0.888115 | 3.643984 | 4.303725 | 3.95491  | -2.1548  | 1.233111 | 150.3506 | 7.89E-21 | 9.04E-20 |
| LOC114265074 | 2.757752 | 2.499326 | 2.611269 | 0.855895 | 1.411988 | 1.201788 | 1.049206 | 1.394873 | 41.42067 | 6.01E-09 | 2.49E-08 |
| LOC114265133 | 0.848128 | 0.870726 | 0.877058 | 0.340091 | 0.464145 | 0.377128 | 1.012696 | 0.690584 | 24.13621 | 4.05E-06 | 1.23E-05 |
| LOC114265144 | 1.07349  | 1.166085 | 1.35988  | 0.183662 | 0.090381 | 0.052073 | 3.41775  | 0.739632 | 154.8009 | 3.46E-21 | 4.1E-20  |

|              |          |          |          |          |          |          |          |          |          |          |          |
|--------------|----------|----------|----------|----------|----------|----------|----------|----------|----------|----------|----------|
| LOC114265165 | 7.785248 | 8.009875 | 8.486887 | 2.663942 | 3.102549 | 2.433735 | 1.457247 | 2.431005 | 148.4949 | 1.12E-20 | 1.26E-19 |
| LOC114265179 | 0.124279 | 0.065304 | 0.127447 | 0.256039 | 0.462486 | 0.341618 | -1.84911 | -0.1729  | 40.53473 | 8.2E-09  | 3.36E-08 |
| LOC114265183 | 15.3187  | 13.58507 | 14.77484 | 4.86793  | 4.801359 | 5.085415 | 1.459244 | 4.334417 | 557.4107 | 4.11E-40 | 2.09E-38 |
| LOC114265184 | 3.355901 | 3.465149 | 3.702569 | 1.063145 | 1.116113 | 0.861227 | 1.689582 | 2.305911 | 177.0121 | 6.96E-23 | 9.52E-22 |
| LOC114265191 | 1.787159 | 1.565151 | 1.227266 | 0.586577 | 0.675013 | 0.409379 | 1.359619 | 0.445957 | 32.54477 | 1.5E-07  | 5.37E-07 |
| LOC114265244 | 0.076798 | 0.194567 | 0.137119 | 0.488616 | 0.494639 | 0.580529 | -2.06158 | 0.102541 | 60.14001 | 1.37E-11 | 7.27E-11 |
| LOC114265246 | 0.538298 | 0.454592 | 0.640738 | 1.365865 | 1.444616 | 1.433434 | -1.48233 | 1.428728 | 89.88044 | 3.76E-15 | 2.73E-14 |
| LOC114265258 | 8.336029 | 7.556992 | 7.862837 | 1.582143 | 0.941215 | 1.249375 | 2.573819 | 2.835771 | 487.0193 | 7.05E-38 | 3.05E-36 |
| LOC114265274 | 2.567967 | 2.801165 | 2.292495 | 0        | 0.05743  | 0        | 6.496948 | 0.122609 | 154.6968 | 3.52E-21 | 4.17E-20 |
| LOC114265291 | 0.052497 | 0.044334 | 0.043261 | 2.958356 | 2.817714 | 3.084514 | -6.01999 | 1.810675 | 713.2697 | 2.68E-44 | 1.82E-42 |
| LOC114265292 | 0.651833 | 0.709083 | 0.752613 | 0.341417 | 0.347885 | 0.280911 | 1.020841 | 1.52795  | 43.85886 | 2.59E-09 | 1.11E-08 |
| LOC114265342 | 1.052608 | 0.883116 | 0.748352 | 0.187593 | 0.177246 | 0.198567 | 2.133819 | -0.15745 | 44.24532 | 2.27E-09 | 9.79E-09 |
| LOC114265360 | 1.863927 | 1.574083 | 2.047974 | 0.141179 | 0.518743 | 0.355803 | 2.255461 | 0.457046 | 73.66295 | 2.72E-13 | 1.68E-12 |
| LOC114265430 | 0.572258 | 0.681182 | 0.449117 | 0.148609 | 0.140412 | 0.112359 | 1.972666 | -0.42048 | 31.47206 | 2.25E-07 | 7.9E-07  |
| LOC114265449 | 2.832391 | 2.923493 | 3.918898 | 0.095348 | 0.225221 | 0.180224 | 4.085228 | 1.041605 | 229.8652 | 2.09E-26 | 3.78E-25 |
| LOC114265388 | 258.2175 | 244.2846 | 269.5768 | 541.6513 | 551.5489 | 551.0557 | -1.19653 | 9.303845 | 2669.989 | 1.19E-23 | 1.75E-22 |
| LOC114265387 | 1562.941 | 1495.519 | 1532.223 | 2980.643 | 3094.015 | 3085.744 | -1.10235 | 10.68254 | 4116.547 | 2.4E-18  | 2.25E-17 |
| LOC114265436 | 2.050751 | 2.639019 | 2.161277 | 4.032218 | 4.672396 | 4.544196 | -1.06862 | 1.308314 | 44.47054 | 2.1E-09  | 9.1E-09  |
| LOC114265394 | 0.812303 | 0.694253 | 1.064561 | 0.28465  | 0.532294 | 0.349725 | 1.00599  | 1.007461 | 26.65881 | 1.83E-06 | 5.8E-06  |
| LOC114265396 | 19.49019 | 19.87964 | 18.50704 | 7.128072 | 6.414177 | 5.946835 | 1.472818 | 4.315931 | 537.2194 | 1.69E-39 | 8.23E-38 |
| LOC114265409 | 5.248368 | 4.844306 | 5.060487 | 0.292059 | 0.281059 | 0.171747 | 4.251968 | 2.177978 | 558.7615 | 3.74E-40 | 1.91E-38 |
| LOC114265411 | 2.093152 | 2.401354 | 2.299833 | 0.430752 | 0.367423 | 0.678497 | 2.066875 | 1.13914  | 109.4965 | 3.5E-17  | 2.97E-16 |
| LOC114265466 | 1.143394 | 1.124489 | 1.081367 | 0.499889 | 0.352165 | 0.318274 | 1.439611 | 0.732138 | 46.10897 | 1.21E-09 | 5.35E-09 |
| LOC114265495 | 12.29151 | 11.85765 | 12.04966 | 4.298052 | 4.128173 | 3.45705  | 1.510772 | 3.837389 | 466.6618 | 3.51E-37 | 1.44E-35 |
| LOC114265532 | 3.62203  | 2.893801 | 3.137504 | 1.393338 | 1.14009  | 0.8469   | 1.43707  | 2.142655 | 111.862  | 4.51E-17 | 3.79E-16 |
| LOC114265592 | 2.001686 | 2.375726 | 2.169615 | 0        | 0.038716 | 0        | 6.835202 | 0.427287 | 199.7668 | 1.77E-24 | 2.74E-23 |

|              |          |          |          |          |          |          |          |          |          |          |          |
|--------------|----------|----------|----------|----------|----------|----------|----------|----------|----------|----------|----------|
| LOC114265549 | 3.251447 | 3.747605 | 3.516241 | 1.489272 | 1.319178 | 1.266743 | 1.267444 | 1.557366 | 66.75938 | 1.93E-12 | 1.1E-11  |
| LOC114265559 | 0.455671 | 0.379816 | 0.383627 | 2.183777 | 1.871895 | 1.813756 | -2.35602 | 2.616056 | 420.5297 | 1.68E-35 | 6.04E-34 |
| LOC114265635 | 2.14626  | 2.610019 | 2.358185 | 0.062424 | 0.073726 | 0.16519  | 4.365601 | 1.187376 | 276.783  | 4.52E-29 | 1E-27    |
| LOC114265666 | 2.212332 | 2.503352 | 2.526576 | 0.950926 | 1.123091 | 1.153342 | 1.045022 | 2.289064 | 74.45129 | 2.19E-13 | 1.36E-12 |
| LOC114265699 | 0.530349 | 0.5836   | 0.622448 | 1.073635 | 0.879848 | 1.82228  | -1.24651 | 1.238473 | 37.74032 | 1.14E-06 | 3.71E-06 |
| LOC114265711 | 2.894033 | 2.744148 | 3.012438 | 0.046148 | 0.109005 | 0        | 5.603658 | 0.894372 | 260.584  | 3.42E-28 | 7.06E-27 |
| LOC114265715 | 1.839133 | 1.752266 | 1.509998 | 0.698034 | 0.578535 | 0.555539 | 1.386246 | 0.861302 | 47.58658 | 7.36E-10 | 3.34E-09 |
| LOC114265731 | 2.023563 | 2.090301 | 1.624029 | 0.639735 | 0.692595 | 0.519961 | 1.530869 | 2.137159 | 126.5845 | 1.19E-18 | 1.15E-17 |
| LOC114265749 | 0.931792 | 0.73069  | 0.895824 | 1.663585 | 1.881422 | 1.943851 | -1.20873 | 1.317453 | 57.28845 | 3.28E-11 | 1.68E-10 |
| LOC114265759 | 46.32276 | 45.19798 | 45.49223 | 20.03647 | 19.90979 | 20.54492 | 1.073951 | 6.440771 | 1030.928 | 2.16E-38 | 9.65E-37 |
| LOC114265762 | 0.521845 | 0.382621 | 0.453364 | 0.176487 | 0.12159  | 0.083398 | 1.767015 | -0.28967 | 29.34365 | 5.1E-07  | 1.72E-06 |
| LOC114265821 | 0.026833 | 0.120856 | 0.029483 | 3.95099  | 3.45653  | 3.651051 | -5.99741 | 1.090076 | 416.5079 | 2.4E-35  | 8.46E-34 |
| LOC114265847 | 1.774373 | 1.563606 | 2.017389 | 0.75729  | 0.485845 | 0.678594 | 1.387439 | 1.295025 | 63.18658 | 5.49E-12 | 3.01E-11 |
| LOC114265923 | 0.227996 | 0.042787 | 0.041751 | 3.66103  | 2.991349 | 3.290257 | -4.95094 | 0.45618  | 231.6421 | 1.63E-26 | 2.98E-25 |
| LOC114265925 | 0.585929 | 0.377003 | 0.321892 | 1.74983  | 2.15649  | 2.761031 | -2.46991 | -0.00237 | 75.74557 | 1.53E-13 | 9.64E-13 |
| LOC114265872 | 2.364583 | 2.595231 | 2.494893 | 1.039682 | 0.928574 | 0.997256 | 1.22639  | 2.625454 | 128.3793 | 5.92E-19 | 5.84E-18 |
| LOC114265880 | 5.406981 | 5.658373 | 5.589691 | 2.695289 | 2.617779 | 2.135446 | 1.063671 | 3.763939 | 227.1939 | 6.25E-26 | 1.09E-24 |
| LOC114265882 | 3.284212 | 2.897414 | 2.86448  | 0.800118 | 0.775367 | 0.418808 | 2.099163 | 0.79895  | 88.00311 | 6.05E-15 | 4.31E-14 |
| LOC114265899 | 5.039656 | 5.115998 | 5.049541 | 13.81299 | 13.7537  | 14.85789 | -1.58789 | 3.495616 | 462.0571 | 5.09E-37 | 2.06E-35 |
| LOC114265939 | 13.32554 | 15.28461 | 13.82141 | 4.06954  | 4.272292 | 3.809441 | 1.696752 | 2.948597 | 285.0187 | 1.67E-29 | 3.83E-28 |
| LOC114265976 | 358.9903 | 346.5861 | 367.5532 | 117.5156 | 122.6037 | 132.0877 | 1.421687 | 7.473387 | 1984.088 | 1.37E-44 | 9.43E-43 |
| LOC114265985 | 7.235116 | 6.651714 | 7.653531 | 0.559666 | 0.826242 | 1.031419 | 3.00981  | 2.647033 | 517.1666 | 7.23E-39 | 3.37E-37 |
| LOC114266001 | 0        | 0        | 0        | 3.250311 | 2.258105 | 2.09607  | -8.29822 | -0.43938 | 151.7598 | 8.84E-21 | 1.01E-19 |
| LOC114266003 | 1.744208 | 1.808924 | 1.790353 | 0        | 0        | 0        | 8.907963 | 0.369974 | 205.0904 | 1.3E-24  | 2.03E-23 |
| LOC114266027 | 2.718465 | 2.905342 | 3.138766 | 11.22348 | 8.96889  | 9.182327 | -1.83869 | 2.080017 | 195.7149 | 3.32E-24 | 5.05E-23 |
| LOC114266022 | 20.98535 | 20.66093 | 20.21875 | 45.76756 | 41.73365 | 40.0748  | -1.14653 | 5.193003 | 671.7161 | 2.32E-42 | 1.38E-40 |



|              |          |          |          |          |          |          |          |          |          |          |          |
|--------------|----------|----------|----------|----------|----------|----------|----------|----------|----------|----------|----------|
| LOC114266037 | 4.643402 | 4.639916 | 4.487534 | 1.701433 | 1.635418 | 1.704065 | 1.344459 | 2.960987 | 201.109  | 1.43E-24 | 2.24E-23 |
| LOC114266083 | 3.163863 | 3.233922 | 3.113454 | 0        | 0.021983 | 0.010554 | 7.84618  | 2.641234 | 1046.076 | 5.1E-51  | 5.99E-49 |
| LOC114266043 | 0.334538 | 0.452027 | 0.229732 | 0        | 0        | 0.011495 | 5.844334 | -0.44605 | 87.85129 | 9.72E-15 | 6.77E-14 |
| LOC114266121 | 2.015973 | 1.632793 | 1.515549 | 14.46584 | 14.47785 | 14.43708 | -3.16439 | 2.817617 | 777.8869 | 8.47E-46 | 6.36E-44 |
| LOC114266130 | 1.575858 | 1.731135 | 2.322692 | 0.419214 | 0.330075 | 0.316955 | 2.291688 | -0.03035 | 53.26254 | 1.16E-10 | 5.68E-10 |
| LOC114266162 | 1.38016  | 1.887069 | 1.444228 | 4.181473 | 3.52752  | 3.567962 | -1.35778 | 1.319955 | 69.26292 | 9.38E-13 | 5.5E-12  |
| LOC114266138 | 1.561754 | 1.852739 | 1.302294 | 0.430918 | 0.478998 | 0.325804 | 1.828814 | 1.163626 | 88.88698 | 5.34E-15 | 3.82E-14 |
| LOC114266139 | 0.572774 | 0.5191   | 0.506534 | 0.025395 | 0.059986 | 0.115203 | 2.776437 | -0.39974 | 51.93039 | 1.78E-10 | 8.55E-10 |
| LOC114266169 | 1.216398 | 0.778217 | 1.184631 | 0.100509 | 0.158275 | 0.075992 | 3.099089 | -0.41565 | 57.90169 | 2.72E-11 | 1.4E-10  |
| LOC114266179 | 0.445762 | 0.435003 | 0.261214 | 1.242483 | 1.27603  | 0.980248 | -1.69337 | -0.26981 | 33.33167 | 1.12E-07 | 4.06E-07 |
| LOC114266172 | 1.612274 | 1.783567 | 1.81291  | 3.530702 | 3.495188 | 3.848683 | -1.17249 | 3.120886 | 190.4871 | 7.62E-24 | 1.13E-22 |
| LOC114266181 | 2.008899 | 1.995897 | 2.077422 | 4.725885 | 2.875321 | 4.141546 | -1.03263 | 0.645331 | 25.56907 | 2.27E-06 | 7.11E-06 |
| LOC114266177 | 42.97534 | 44.20367 | 45.99974 | 8.303492 | 7.956968 | 8.386914 | 2.328514 | 6.037736 | 3798.311 | 7.58E-75 | 5.36E-72 |
| LOC114266197 | 5.515342 | 5.74415  | 5.832521 | 11.95141 | 11.46643 | 11.8306  | -1.14947 | 4.452195 | 412.0831 | 3.55E-35 | 1.24E-33 |
| LOC114266217 | 0.623882 | 0.66034  | 0.658066 | 0        | 0.107155 | 0.068597 | 3.214318 | -0.0456  | 78.38842 | 7.48E-14 | 4.83E-13 |
| LOC114266215 | 0.345751 | 0.269525 | 0.204556 | 1.595455 | 1.370409 | 1.718029 | -2.58916 | 0.102127 | 90.00177 | 3.65E-15 | 2.65E-14 |
| LOC114266267 | 2.778847 | 2.600878 | 2.898641 | 0.255769 | 0.25173  | 0.22561  | 3.388847 | 1.973989 | 395.8069 | 1.55E-34 | 5.15E-33 |
| LOC114266240 | 0.20833  | 0.268091 | 0.310652 | 1.271374 | 1.043635 | 1.47255  | -2.37291 | 0.661057 | 115.6927 | 8.8E-18  | 7.88E-17 |
| LOC114266286 | 0.431263 | 0.414968 | 0.465231 | 0.812466 | 0.909059 | 0.905256 | -1.11275 | 1.371043 | 51.41492 | 2.1E-10  | 1E-09    |
| LOC114266253 | 1.759238 | 1.549416 | 1.875534 | 0.664927 | 0.772846 | 0.933643 | 1.00262  | 1.181383 | 33.26037 | 1.15E-07 | 4.17E-07 |
| LOC114266263 | 2.104991 | 2.153281 | 2.007076 | 0.44102  | 0.439162 | 0.402092 | 2.184484 | 2.420705 | 294.2601 | 5.62E-30 | 1.33E-28 |
| LOC114266302 | 5.763788 | 5.066764 | 4.555254 | 2.067935 | 2.098598 | 2.46686  | 1.10246  | 2.151342 | 73.86921 | 2.57E-13 | 1.59E-12 |
| LOC114266346 | 1.341977 | 1.305009 | 1.407464 | 4.269081 | 3.055756 | 3.563071 | -1.51153 | 1.326878 | 85.33401 | 1.2E-14  | 8.29E-14 |
| LOC114266378 | 1.447754 | 1.402703 | 1.442735 | 0.550833 | 0.674656 | 0.370194 | 1.324096 | -0.03816 | 22.23817 | 8.86E-06 | 2.58E-05 |
| LOC114266371 | 0.046252 | 0.02604  | 0        | 1.093024 | 0.728209 | 0.985326 | -5.13057 | -0.62755 | 108.3994 | 4.49E-17 | 3.77E-16 |
| LOC114266406 | 6.208407 | 6.100244 | 6.081985 | 0.978712 | 0.939175 | 0.87872  | 2.614649 | 2.664043 | 464.8066 | 4.08E-37 | 1.66E-35 |

|              |          |          |          |          |          |          |          |          |          |          |          |
|--------------|----------|----------|----------|----------|----------|----------|----------|----------|----------|----------|----------|
| LOC114266483 | 0        | 0        | 0        | 1.188351 | 1.069334 | 0.984045 | -7.84548 | -0.86776 | 111.8525 | 2.69E-17 | 2.3E-16  |
| LOC114266408 | 4.394149 | 3.831111 | 4.408935 | 2.218827 | 1.725192 | 1.719528 | 1.069831 | 2.600176 | 94.16042 | 1.3E-15  | 9.73E-15 |
| LOC114266477 | 7.636827 | 8.344891 | 8.556238 | 17.71201 | 16.96116 | 17.47619 | -1.19389 | 3.377349 | 249.6361 | 1.42E-27 | 2.78E-26 |
| LOC114266449 | 3.912682 | 4.296077 | 4.085145 | 7.395643 | 8.163458 | 8.347302 | -1.07295 | 3.244983 | 178.5459 | 5.38E-23 | 7.43E-22 |
| LOC114266457 | 74.01906 | 70.86006 | 73.51625 | 23.67813 | 23.76844 | 22.87122 | 1.529484 | 6.365634 | 1941.449 | 2.81E-62 | 7.52E-60 |
| LOC114266460 | 0.299339 | 0.711561 | 0.877058 | 1.632436 | 1.380535 | 1.50851  | -1.37406 | 0.020381 | 26.41829 | 1.73E-06 | 5.5E-06  |
| LOC114266568 | 5.792422 | 5.687309 | 5.726757 | 2.227037 | 2.199559 | 2.407532 | 1.223178 | 3.485802 | 264.8305 | 2E-28    | 4.2E-27  |
| LOC114266569 | 52.30254 | 53.14197 | 48.9146  | 22.32884 | 23.6215  | 24.57844 | 1.023352 | 6.088183 | 764.8489 | 1.08E-40 | 5.7E-39  |
| LOC114266571 | 3.357154 | 3.324708 | 3.466437 | 11.10251 | 11.28901 | 9.784055 | -1.7653  | 2.420336 | 230.4945 | 1.92E-26 | 3.47E-25 |
| LOC114266615 | 0.192826 | 0.128299 | 0.288909 | 0.525786 | 0.288536 | 0.361391 | -1.01043 | 0.096699 | 15.25527 | 0.000195 | 0.00047  |
| LOC114266660 | 0.449963 | 0.443326 | 0.324446 | 1.533662 | 1.368561 | 1.777985 | -2.04187 | 1.107563 | 124.414  | 1.35E-18 | 1.29E-17 |
| LOC114266688 | 4.534543 | 3.948886 | 4.638685 | 8.973894 | 7.76912  | 8.56554  | -1.04588 | 3.13113  | 152.2726 | 5.51E-21 | 6.4E-20  |
| LOC114266699 | 2.109696 | 2.137962 | 2.279377 | 0.383505 | 0.603918 | 0.724891 | 1.78125  | 1.292924 | 97.60028 | 5.62E-16 | 4.35E-15 |
| LOC114266712 | 6.930889 | 6.836533 | 6.3221   | 2.98847  | 2.887799 | 3.132477 | 1.05046  | 2.972286 | 127.6604 | 6.87E-19 | 6.75E-18 |
| LOC114266766 | 0.882386 | 0.894208 | 0.799849 | 0.200503 | 0.221017 | 0.121275 | 2.139551 | -0.29763 | 39.91159 | 1.02E-08 | 4.14E-08 |
| LOC114266722 | 1.555689 | 1.199796 | 1.217584 | 0.077479 | 0        | 0        | 5.644948 | 0.105609 | 138.3845 | 7.86E-20 | 8.34E-19 |
| LOC114266748 | 3.875436 | 2.93884  | 3.389102 | 1.293952 | 0.566008 | 0.978318 | 1.772293 | -0.10852 | 33.93566 | 8.91E-08 | 3.28E-07 |
| LOC114266727 | 2.37465  | 2.19967  | 2.403481 | 0.893108 | 0.636232 | 0.836026 | 1.46562  | 2.027417 | 115.8646 | 8.47E-18 | 7.6E-17  |
| LOC114266775 | 2.248588 | 2.301732 | 1.836449 | 0.174868 | 0.103264 | 0.099159 | 4.003613 | 1.54581  | 331.8845 | 8.56E-32 | 2.31E-30 |
| LOC114266777 | 2.242075 | 2.383195 | 1.734277 | 0.912955 | 1.001228 | 0.83817  | 1.102446 | 1.399433 | 44.5076  | 2.07E-09 | 8.99E-09 |
| LOC114266779 | 27.75772 | 25.0314  | 26.76948 | 7.888284 | 9.715484 | 8.696247 | 1.484136 | 4.439319 | 569.2969 | 2.52E-39 | 1.21E-37 |
| LOC114266862 | 8.692094 | 8.289689 | 8.162833 | 0.708222 | 0.730688 | 0.701644 | 3.44532  | 3.335736 | 1155.799 | 8.34E-53 | 1.1E-50  |
| LOC114266873 | 0.428344 | 0.347715 | 0.306463 | 0.036216 | 0.042773 | 0.054764 | 2.853596 | -0.46709 | 51.40145 | 2.11E-10 | 1.01E-09 |
| LOC114266899 | 7.943991 | 8.183389 | 7.395545 | 3.512616 | 3.242034 | 3.29022  | 1.126185 | 3.965378 | 290.2121 | 9.03E-30 | 2.1E-28  |
| LOC114266923 | 1.683856 | 2.150708 | 1.988192 | 0.319801 | 0.215829 | 0.345417 | 2.60347  | 0.533748 | 99.07112 | 3.95E-16 | 3.09E-15 |
| LOC114266958 | 0.268809 | 0.332946 | 0.443027 | 1.123888 | 1.615925 | 1.588639 | -2.17499 | 0.070364 | 65.9244  | 2.45E-12 | 1.39E-11 |

|              |          |          |          |          |          |          |          |          |          |          |          |
|--------------|----------|----------|----------|----------|----------|----------|----------|----------|----------|----------|----------|
| LOC114267004 | 0.791251 | 1.039438 | 1.304071 | 1.797942 | 2.831278 | 3.081238 | -1.43848 | -0.1783  | 26.19073 | 1.77E-06 | 5.62E-06 |
| LOC114266965 | 4.166539 | 3.026783 | 3.012587 | 7.916077 | 7.348611 | 8.940715 | -1.34442 | 2.708862 | 159.5812 | 1.09E-20 | 1.24E-19 |
| LOC114267103 | 0.660822 | 1.091324 | 0.532453 | 16.65742 | 14.12438 | 14.59229 | -4.40785 | 2.472079 | 806.9238 | 4.18E-46 | 3.23E-44 |
| LOC114267104 | 0.827843 | 0.239696 | 0.441799 | 1.332886 | 1.421862 | 1.592902 | -1.60188 | 0.37254  | 42.4335  | 1.3E-08  | 5.22E-08 |
| LOC114267162 | 0.995463 | 0.88737  | 1.298836 | 2.940557 | 2.671495 | 2.992858 | -1.53764 | 1.542507 | 102.1526 | 1.9E-16  | 1.53E-15 |
| LOC114267125 | 0.409979 | 0.476062 | 0.422308 | 0.768559 | 1.008563 | 1.285429 | -1.35881 | 0.827781 | 48.69809 | 5.09E-10 | 2.34E-09 |
| LOC114267163 | 0.456932 | 0.379109 | 0.343508 | 1.13664  | 1.067058 | 1.52044  | -1.75908 | 0.100227 | 47.44022 | 7.73E-10 | 3.49E-09 |
| LOC114267181 | 10.72548 | 9.546475 | 8.3427   | 34.84703 | 37.91524 | 38.46724 | -2.06313 | 4.396955 | 1018.283 | 1.34E-43 | 8.7E-42  |
| LOC114267196 | 0.817575 | 0.460294 | 0.684422 | 0.176929 | 0.250755 | 0.240788 | 1.425651 | -0.36165 | 19.2063  | 3.2E-05  | 8.63E-05 |
| LOC114267221 | 1.634501 | 1.368535 | 1.197263 | 2.437933 | 3.179249 | 3.456088 | -1.22637 | 0.724085 | 38.18707 | 1.89E-08 | 7.45E-08 |
| LOC114267283 | 2.804184 | 3.442198 | 3.358876 | 0.710308 | 1.118546 | 0.947722 | 1.6531   | 1.483085 | 96.99846 | 6.5E-16  | 4.99E-15 |
| LOC114267292 | 1.151892 | 1.063563 | 1.037818 | 2.052055 | 1.978432 | 2.438066 | -1.09844 | 1.124153 | 41.89152 | 5.1E-09  | 2.13E-08 |
| LOC114267370 | 1.033256 | 0.803834 | 0.743093 | 2.766185 | 2.769557 | 2.788572 | -1.78378 | 1.573475 | 137.6822 | 9.04E-20 | 9.53E-19 |
| LOC114267371 | 2.78786  | 2.746734 | 2.860431 | 0.037263 | 0.05868  | 0.028174 | 5.86826  | 1.136639 | 335.1112 | 6.09E-32 | 1.67E-30 |
| LOC114267326 | 2.285198 | 2.490124 | 2.645834 | 0.35734  | 0.328251 | 0.270174 | 2.859779 | 2.37148  | 407.7076 | 5.25E-35 | 1.82E-33 |
| LOC114267329 | 0.880031 | 1.264269 | 1.050283 | 0.16549  | 0.086868 | 0.333659 | 2.290071 | 0.442316 | 70.2308  | 1.68E-12 | 9.66E-12 |
| LOC114267334 | 0.404561 | 0.306063 | 0.354218 | 0.919275 | 0.769044 | 0.97305  | -1.41625 | 1.595198 | 91.08955 | 2.78E-15 | 2.03E-14 |
| LOC114267409 | 0.497817 | 0.437923 | 0.410229 | 1.074619 | 0.890652 | 0.898012 | -1.17244 | 0.494153 | 30.31344 | 3.51E-07 | 1.2E-06  |
| LOC114267455 | 4.816269 | 4.829636 | 4.852514 | 0.264305 | 0.364184 | 0.174854 | 4.059708 | 2.10049  | 501.7919 | 2.28E-38 | 1.01E-36 |
| LOC114267417 | 3.847981 | 4.637947 | 3.989744 | 0.788163 | 1.008431 | 0.819371 | 2.12521  | 0.58891  | 78.37758 | 7.5E-14  | 4.84E-13 |
| LOC114267481 | 17.08789 | 18.41336 | 20.54166 | 1.419534 | 1.38068  | 0.883867 | 3.833834 | 2.705824 | 705.9702 | 4.03E-44 | 2.71E-42 |
| LOC114267434 | 277.1753 | 277.9524 | 273.3331 | 90.0162  | 88.01091 | 93.6794  | 1.503285 | 7.822472 | 2604.063 | 2.96E-44 | 2E-42    |
| LOC114267577 | 3.132379 | 3.033265 | 3.028675 | 7.630102 | 6.545688 | 7.232637 | -1.31536 | 1.326949 | 68.30215 | 1.23E-12 | 7.15E-12 |
| LOC114267563 | 22.55501 | 22.99265 | 24.2204  | 9.621562 | 11.53572 | 10.82919 | 1.010803 | 4.079555 | 243.8545 | 3.07E-27 | 5.86E-26 |
| LOC114267608 | 3.363264 | 2.945466 | 3.32209  | 1.358625 | 0.972487 | 1.027215 | 1.435609 | 1.007939 | 56.3261  | 4.42E-11 | 2.24E-10 |
| LOC114267643 | 3.274532 | 3.752957 | 3.897687 | 0.035432 | 0.167386 | 0.107155 | 4.923792 | 1.579474 | 399.404  | 1.11E-34 | 3.74E-33 |

|              |          |          |          |          |          |          |          |          |          |          |          |
|--------------|----------|----------|----------|----------|----------|----------|----------|----------|----------|----------|----------|
| LOC114267662 | 0.390175 | 0.422438 | 0.412213 | 0.709268 | 0.816202 | 0.763133 | -1.01248 | 0.30311  | 20.1104  | 2.17E-05 | 6E-05    |
| LOC114267680 | 5.650029 | 5.75354  | 5.325923 | 14.14332 | 13.54435 | 14.42752 | -1.4366  | 4.282258 | 569.9556 | 1.74E-40 | 9.11E-39 |
| LOC114267683 | 1.743515 | 1.8937   | 1.559662 | 0        | 0        | 0        | 9.440293 | 0.856962 | 294.8278 | 1.07E-29 | 2.47E-28 |
| LOC114267688 | 0.342521 | 0.376271 | 0.357984 | 1.063047 | 0.765264 | 0.769292 | -1.35287 | 1.173005 | 61.6331  | 8.73E-12 | 4.71E-11 |
| LOC114267690 | 0.430478 | 0.540647 | 0.454793 | 1.05341  | 1.066396 | 1.137787 | -1.30183 | 0.558911 | 38.94804 | 1.44E-08 | 5.75E-08 |
| LOC114267809 | 1.80776  | 1.68458  | 1.945166 | 1.065177 | 0.678086 | 0.771078 | 1.033462 | 1.71135  | 49.01387 | 4.59E-10 | 2.12E-09 |
| LOC114267812 | 0.700779 | 0.83642  | 0.677578 | 0.127389 | 0.160483 | 0.115578 | 2.327156 | 0.064564 | 59.83037 | 1.51E-11 | 7.95E-11 |
| LOC114267825 | 2.346371 | 1.590098 | 2.100638 | 0.434427 | 0.435341 | 0.418036 | 2.1236   | 0.845837 | 92.33014 | 2.04E-15 | 1.51E-14 |
| LOC114267863 | 1.114929 | 0.77607  | 1.1582   | 0.276374 | 0.478737 | 0.320402 | 1.377549 | 1.09729  | 51.07565 | 3.71E-10 | 1.73E-09 |
| LOC114267864 | 0.771664 | 0.716836 | 0.939711 | 3.425043 | 3.120146 | 3.623632 | -2.1713  | 3.327059 | 654.6651 | 7.91E-43 | 4.88E-41 |
| LOC114267867 | 26.24779 | 26.51253 | 26.74726 | 5.940835 | 4.898603 | 6.684476 | 2.075054 | 4.223328 | 905.2269 | 2.06E-47 | 1.73E-45 |
| LOC114267871 | 1.789654 | 2.066817 | 1.663849 | 4.115249 | 3.940795 | 3.994384 | -1.23072 | 2.552548 | 129.1622 | 5.04E-19 | 4.99E-18 |
| LOC114267946 | 0.639275 | 0.798707 | 0.577313 | 0.031838 | 0.025068 | 0.012036 | 4.732831 | 0.394611 | 161.0398 | 1.11E-21 | 1.37E-20 |
| LOC114267972 | 26.00013 | 26.23247 | 27.5153  | 4.737377 | 4.840393 | 4.78127  | 2.36657  | 5.255981 | 2591.918 | 1.18E-67 | 4.79E-65 |
| LOC114268005 | 2.194446 | 2.892809 | 2.587553 | 0.291886 | 0.306428 | 0.36781  | 2.834165 | -0.11916 | 67.26451 | 1.66E-12 | 9.54E-12 |
| LOC114268027 | 3.794587 | 4.398365 | 3.556143 | 0.405758 | 0.07987  | 0.076695 | 4.355601 | 0.292308 | 138.1282 | 8.27E-20 | 8.75E-19 |
| LOC114268080 | 3.848571 | 3.088758 | 2.384202 | 1.116385 | 0.937605 | 0.618981 | 1.730466 | 0.65203  | 54.88578 | 9.14E-11 | 4.51E-10 |
| LOC114268094 | 0.557732 | 0.574176 | 0.66533  | 0        | 0        | 0        | 7.863852 | -0.55217 | 95.54955 | 1.15E-15 | 8.68E-15 |
| LOC114268127 | 1.811303 | 0.927056 | 1.537846 | 3.14296  | 3.299548 | 3.507867 | -1.30744 | -0.11732 | 23.33837 | 5.62E-06 | 1.68E-05 |
| LOC114268101 | 0.57035  | 0.588695 | 0.887779 | 2.030389 | 1.802744 | 1.469792 | -1.46289 | 0.674798 | 49.72971 | 3.63E-10 | 1.7E-09  |
| LOC114268102 | 0.985911 | 0.654694 | 1.111038 | 3.906099 | 4.088648 | 3.787152 | -2.19337 | 1.558263 | 188.7973 | 9.99E-24 | 1.47E-22 |
| LOC114268168 | 0.23774  | 0.066924 | 0.195911 | 2.809092 | 3.062472 | 2.940743 | -4.14709 | -0.29613 | 120.6681 | 2.99E-18 | 2.79E-17 |
| LOC114268173 | 2.045887 | 2.147484 | 1.968501 | 0.504279 | 0.496315 | 0.667223 | 1.763506 | 1.799701 | 138.0833 | 8.35E-20 | 8.83E-19 |
| LOC114268180 | 0.186953 | 0.287058 | 0.317457 | 1.328496 | 0.82708  | 0.817564 | -1.98149 | 0.18996  | 58.51019 | 2.25E-11 | 1.17E-10 |
| LOC114268181 | 17.53334 | 18.23138 | 18.65022 | 34.809   | 33.828   | 34.31079 | -1.02517 | 6.008466 | 847.5326 | 1.62E-42 | 9.78E-41 |
| LOC114268185 | 1.631537 | 1.799615 | 2.231651 | 4.055336 | 3.193035 | 3.661035 | -1.04425 | 1.353579 | 43.12092 | 3.33E-09 | 1.42E-08 |

|              |          |          |          |          |          |          |          |          |          |          |          |
|--------------|----------|----------|----------|----------|----------|----------|----------|----------|----------|----------|----------|
| LOC114268201 | 0.019529 | 0        | 0        | 1.668524 | 1.593259 | 1.744656 | -7.47198 | 0.389867 | 281.6517 | 2.5E-29  | 5.65E-28 |
| LOC114268207 | 0.0146   | 0.049317 | 0.032082 | 0.557327 | 0.710472 | 0.581903 | -4.31402 | -0.51561 | 105.3135 | 9.11E-17 | 7.48E-16 |
| LOC114268256 | 0.87502  | 1.04685  | 1.321953 | 3.081845 | 1.956888 | 3.382388 | -1.47637 | 0.158811 | 34.70532 | 6.7E-08  | 2.5E-07  |
| LOC114268238 | 0.301766 | 0.169894 | 0.189464 | 0.587739 | 0.694149 | 0.607308 | -1.60096 | 0.30815  | 45.95849 | 1.27E-09 | 5.61E-09 |
| LOC114268250 | 2.34085  | 1.60828  | 2.027077 | 0.685167 | 0.454297 | 0.381709 | 1.910665 | 0.995772 | 84.36826 | 1.76E-14 | 1.2E-13  |
| LOC114268288 | 0.516574 | 0.491181 | 0.454065 | 0.146073 | 0.197165 | 0.220882 | 1.236219 | -0.02288 | 20.21253 | 2.08E-05 | 5.76E-05 |
| LOC114268321 | 0        | 0        | 0.023992 | 25.99937 | 24.37772 | 24.93931 | -11.2171 | 4.160339 | 4312.275 | 3E-77    | 2.51E-74 |
| LOC114268309 | 3.490068 | 3.235584 | 3.350812 | 1.180804 | 1.307919 | 1.301326 | 1.298463 | 2.669824 | 149.182  | 9.83E-21 | 1.12E-19 |
| LOC114268318 | 4.861592 | 4.766279 | 4.121347 | 0.99041  | 0.899787 | 0.921624 | 2.187822 | 2.013746 | 222.2491 | 6.17E-26 | 1.08E-24 |
| LOC114268358 | 0.642892 | 0.575403 | 0.633924 | 0.029966 | 0.070782 | 0.045312 | 3.458065 | -0.47189 | 64.31752 | 3.93E-12 | 2.19E-11 |
| LOC114268386 | 0        | 0        | 0        | 0.978769 | 0.850372 | 1.505553 | -8.65766 | -0.11157 | 189.695  | 1.53E-22 | 2.02E-21 |
| LOC114268369 | 12.51098 | 11.19698 | 12.21351 | 24.08172 | 23.09841 | 23.51478 | -1.08128 | 5.602529 | 749.4368 | 3.75E-45 | 2.67E-43 |
| LOC114268445 | 2.417272 | 2.010452 | 1.629792 | 0.049934 | 0        | 0.075507 | 5.36599  | 0.326497 | 160.9239 | 1.14E-21 | 1.4E-20  |
| LOC114268420 | 5.086079 | 5.226672 | 5.032825 | 90.8685  | 88.03568 | 86.49451 | -4.21712 | 6.570192 | 11688.38 | 2.7E-96  | 2.86E-92 |
| LOC114268447 | 1.273718 | 1.170008 | 0.994372 | 0        | 0        | 0.046068 | 5.608475 | -0.65055 | 78.20473 | 7.86E-14 | 5.06E-13 |
| LOC114268464 | 3.158906 | 2.441025 | 3.198601 | 0.056297 | 0.088653 | 0.085129 | 5.043484 | 0.663603 | 211.6259 | 2.92E-25 | 4.86E-24 |
| LOC114268500 | 0.698867 | 0.590192 | 0.666244 | 0.018683 | 0.02942  | 0        | 5.149437 | 0.137588 | 140.5157 | 5.18E-20 | 5.55E-19 |
| LOC114268490 | 1.589109 | 1.4091   | 1.484118 | 0.577743 | 0.682344 | 0.546018 | 1.201859 | 0.752077 | 34.57755 | 7.02E-08 | 2.61E-07 |
| LOC114268516 | 49.58776 | 45.99075 | 46.84764 | 2.653771 | 3.361354 | 2.420809 | 3.967823 | 5.537617 | 2184.946 | 1.85E-13 | 1.16E-12 |
| LOC114268538 | 1.969657 | 2.345291 | 2.126832 | 5.823432 | 5.524893 | 4.947452 | -1.44102 | 3.358403 | 324.3364 | 4.22E-31 | 1.09E-29 |
| LOC114268576 | 1.235419 | 0.604817 | 0.826248 | 2.733983 | 2.306407 | 2.21473  | -1.50658 | -0.03927 | 31.69696 | 2.07E-07 | 7.28E-07 |
| LOC114268580 | 8.980961 | 10.28996 | 8.958885 | 1.074065 | 1.296713 | 1.569998 | 2.706043 | 2.059619 | 305.9486 | 1.47E-30 | 3.62E-29 |
| LOC114268602 | 0.936792 | 0.900997 | 0.729082 | 0.106433 | 0.083801 | 0.134117 | 2.842078 | -0.22593 | 62.21811 | 7.33E-12 | 3.98E-11 |
| LOC114268581 | 3.232639 | 3.363223 | 3.44798  | 0.378011 | 0.487037 | 0.571606 | 2.666383 | 1.649698 | 235.6488 | 9.37E-27 | 1.74E-25 |
| LOC114268610 | 5.508501 | 5.443226 | 5.756039 | 23.58843 | 24.22178 | 25.30782 | -2.23562 | 6.02272  | 3674.899 | 3.19E-74 | 2.16E-71 |
| LOC114268714 | 1.47232  | 1.989395 | 2.085035 | 0        | 0        | 0        | 8.443904 | -0.04231 | 141.7433 | 5.78E-20 | 6.18E-19 |

|              |          |          |          |          |          |          |          |          |          |          |          |
|--------------|----------|----------|----------|----------|----------|----------|----------|----------|----------|----------|----------|
| LOC114268712 | 3.854283 | 3.040261 | 4.053691 | 0.149869 | 0.059001 | 0.113312 | 4.984291 | 1.506749 | 381.3105 | 6.01E-34 | 1.9E-32  |
| LOC114268765 | 2.974214 | 2.526408 | 3.267894 | 0.37941  | 0.298735 | 0.358575 | 2.971215 | 0.995376 | 167.2388 | 3.72E-22 | 4.76E-21 |
| LOC114268771 | 0.873729 | 0.86942  | 0.848374 | 0.184684 | 0.20358  | 0.111707 | 2.265694 | -0.20223 | 46.95516 | 9.08E-10 | 4.07E-09 |
| LOC114268843 | 17.16465 | 13.95864 | 16.42551 | 48.72353 | 49.76516 | 52.46496 | -1.77202 | 6.113989 | 929.0258 | 3.79E-12 | 2.11E-11 |
| LOC114268850 | 1.436404 | 1.44285  | 1.805322 | 0.488412 | 0.488095 | 0.667533 | 1.385834 | 1.658381 | 80.54182 | 4.21E-14 | 2.79E-13 |
| LOC114268862 | 1.049848 | 1.405773 | 1.122336 | 0.412635 | 0.203059 | 0.389976 | 1.727228 | -0.13706 | 31.58964 | 2.15E-07 | 7.57E-07 |
| LOC114268854 | 1.517018 | 1.397584 | 1.969867 | 0.43872  | 0.345433 | 0.284317 | 2.097911 | -0.04432 | 46.60443 | 1.02E-09 | 4.56E-09 |
| LOC114268872 | 0.445398 | 0.46693  | 0.405002 | 0.93529  | 0.85732  | 1.129321 | -1.25832 | 1.503945 | 69.07595 | 9.89E-13 | 5.79E-12 |
| LOC114268906 | 0.414961 | 0.412275 | 0.321836 | 0.266232 | 0.157217 | 0.117419 | 1.034218 | -0.35583 | 10.82391 | 0.001436 | 0.003017 |
| LOC114268907 | 3.807701 | 3.703199 | 4.032766 | 1.470345 | 1.387056 | 1.426311 | 1.326443 | 3.376902 | 283.644  | 1.97E-29 | 4.49E-28 |
| LOC114268920 | 2.684031 | 2.143414 | 2.217022 | 0.726673 | 0.790123 | 0.863367 | 1.451555 | 1.365954 | 73.73242 | 2.67E-13 | 1.65E-12 |
| LOC114268973 | 0.911164 | 1.221391 | 0.715095 | 0        | 0        | 0.029817 | 5.954586 | -0.3511  | 97.96217 | 5.15E-16 | 4E-15    |
| LOC114268993 | 0.780554 | 0.878902 | 0.812489 | 0.03734  | 0        | 0        | 5.830466 | -0.45707 | 93.11479 | 1.68E-15 | 1.25E-14 |
| LOC114268990 | 10.39198 | 11.95812 | 11.91921 | 0.118437 | 0.046627 | 0.223867 | 6.277326 | 2.424345 | 803.0265 | 2.37E-46 | 1.86E-44 |
| LOC114269000 | 4.698475 | 5.570257 | 5.063133 | 1.396123 | 0.937605 | 1.148705 | 2.047481 | 2.085716 | 204.024  | 9.17E-25 | 1.45E-23 |
| LOC114269033 | 0.012411 | 0.027949 | 0.013636 | 0.541456 | 0.461851 | 0.392321 | -4.65042 | -0.71166 | 96.73907 | 6.92E-16 | 5.3E-15  |
| LOC114269106 | 0.822356 | 0.82676  | 1.258526 | 2.402513 | 3.278874 | 2.543055 | -1.61636 | 0.969533 | 72.71338 | 3.54E-13 | 2.16E-12 |
| LOC114269122 | 0.544581 | 0.463304 | 0.624948 | 0        | 0.017321 | 0        | 5.99918  | -0.31597 | 105.496  | 8.73E-17 | 7.18E-16 |
| LOC114269124 | 2.035449 | 1.56946  | 1.798869 | 0.482619 | 0.696664 | 0.668972 | 1.419103 | 0.803982 | 47.24998 | 8.23E-10 | 3.71E-09 |
| LOC114269146 | 2.748701 | 2.340458 | 3.032592 | 6.111602 | 5.673691 | 6.213099 | -1.25072 | 3.551072 | 288.2427 | 1.14E-29 | 2.63E-28 |
| LOC114269184 | 2.592654 | 1.927855 | 2.364923 | 0.444621 | 0.420096 | 0.537863 | 2.170317 | -0.06188 | 49.23566 | 4.27E-10 | 1.98E-09 |
| LOC114269189 | 0.623738 | 0.561862 | 0.715786 | 0.226769 | 0.257906 | 0.285755 | 1.180671 | 1.0202   | 40.12536 | 9.47E-09 | 3.85E-08 |
| LOC114269200 | 0.441265 | 0.430615 | 0.474062 | 0.980394 | 0.940351 | 1.091654 | -1.26884 | 1.195305 | 58.30046 | 2.4E-11  | 1.24E-10 |
| LOC114269202 | 13.62168 | 11.42781 | 11.91429 | 3.502489 | 3.206677 | 2.617334 | 1.898129 | 3.367163 | 463.247  | 8.65E-35 | 2.95E-33 |
| LOC114269208 | 0.382405 | 0.363607 | 0.40149  | 0.108133 | 0.036489 | 0.093436 | 2.18061  | -0.11702 | 46.48829 | 1.06E-09 | 4.73E-09 |
| LOC114269214 | 0        | 0        | 0        | 1.238238 | 1.044586 | 0.847033 | -8.72337 | -0.03121 | 208.0218 | 8.4E-25  | 1.34E-23 |

|              |          |          |          |          |          |          |          |          |          |          |          |
|--------------|----------|----------|----------|----------|----------|----------|----------|----------|----------|----------|----------|
| LOC114269225 | 0.017581 | 0.019796 | 0        | 0.798969 | 0.905877 | 1.1115   | -6.05599 | -0.24843 | 162.115  | 9.19E-22 | 1.14E-20 |
| LOC114269230 | 8.728844 | 8.9569   | 8.790127 | 4.056556 | 4.06311  | 3.9642   | 1.026036 | 3.66919  | 216.3515 | 1.45E-25 | 2.47E-24 |
| LOC114269266 | 1.730152 | 1.515226 | 1.636964 | 0        | 0        | 0.19816  | 4.248084 | -0.63387 | 64.30757 | 3.94E-12 | 2.19E-11 |
| LOC114269293 | 33.43205 | 33.42757 | 32.26417 | 13.59289 | 12.51297 | 13.41315 | 1.222655 | 5.793065 | 1021.994 | 1.33E-50 | 1.47E-48 |
| LOC114269310 | 0.065318 | 0.049032 | 0.143536 | 3.245476 | 2.680031 | 3.381465 | -5.22611 | 1.161114 | 402.902  | 8.1E-35  | 2.77E-33 |
| LOC114269326 | 4.241193 | 4.093349 | 4.592046 | 0.944049 | 1.150364 | 0.832728 | 2.034008 | 2.691339 | 311.5755 | 7.8E-31  | 1.97E-29 |
| LOC114269385 | 33.55585 | 35.90402 | 33.17006 | 15.22435 | 13.81906 | 14.22581 | 1.14386  | 4.706041 | 427.2588 | 9.36E-36 | 3.42E-34 |
| LOC114269333 | 0.938862 | 0.944693 | 0.845007 | 5.592114 | 5.90408  | 5.971404 | -2.78442 | 3.377738 | 1064.394 | 2.5E-51  | 2.99E-49 |
| LOC114269334 | 2.442011 | 2.490293 | 2.446888 | 4.913764 | 4.649314 | 4.844469 | -1.06935 | 3.852247 | 281.7095 | 2.49E-29 | 5.62E-28 |
| LOC114269392 | 0.914522 | 0.939646 | 0.803858 | 0.353268 | 0.376322 | 0.439921 | 1.064272 | 0.827445 | 29.15012 | 5.5E-07  | 1.85E-06 |
| LOC114269338 | 0.726859 | 0.701521 | 0.741585 | 0.047189 | 0.081742 | 0.107035 | 3.03502  | 1.281291 | 210.7991 | 3.3E-25  | 5.46E-24 |
| LOC114269417 | 0.588329 | 0.662457 | 0.727225 | 2.072113 | 1.552568 | 1.79408  | -1.54636 | 1.04647  | 73.71043 | 2.69E-13 | 1.65E-12 |
| LOC114269418 | 1.241533 | 1.066244 | 1.156038 | 0.114757 | 0.180711 | 0.20245  | 2.636839 | 0.081527 | 72.76381 | 3.49E-13 | 2.13E-12 |
| LOC114269405 | 0.431182 | 0.346793 | 0.554974 | 0.201552 | 0.141062 | 0.08466  | 1.576324 | -0.30105 | 23.45858 | 5.34E-06 | 1.6E-05  |
| LOC114269506 | 8.335579 | 9.925738 | 10.09072 | 1.139797 | 0.739066 | 1.064534 | 3.166969 | 2.110766 | 379.5591 | 7.1E-34  | 2.23E-32 |
| LOC114269514 | 0.66436  | 0.961802 | 0.938521 | 0.25879  | 0.339605 | 0.260885 | 1.441991 | -0.28535 | 20.97459 | 1.5E-05  | 4.25E-05 |
| LOC114269520 | 4.663516 | 4.443246 | 5.799692 | 2.328967 | 1.98045  | 1.479124 | 1.279369 | 1.080476 | 46.53807 | 1.04E-09 | 4.66E-09 |
| LOC114269534 | 0.314546 | 0.212507 | 0.138242 | 1.372291 | 0.990455 | 1.268114 | -2.50523 | 0.084164 | 81.88296 | 2.95E-14 | 1.98E-13 |
| LOC114269559 | 53.04856 | 54.44174 | 51.17854 | 5.632468 | 3.89874  | 4.07135  | 3.461039 | 4.635659 | 2228.42  | 1.5E-51  | 1.83E-49 |
| LOC114269590 | 2.298826 | 2.395303 | 2.431569 | 0.654895 | 0.773464 | 0.919558 | 1.475684 | 2.483965 | 156.0975 | 2.73E-21 | 3.26E-20 |
| LOC114269604 | 53.39843 | 53.34782 | 54.96045 | 15.24393 | 16.78957 | 16.32401 | 1.633568 | 5.990884 | 1911.586 | 5.44E-62 | 1.44E-59 |
| LOC114269622 | 0.409052 | 0.460592 | 0.599256 | 2.23075  | 3.12252  | 2.389353 | -2.50878 | 0.483177 | 110.7989 | 2.61E-17 | 2.24E-16 |
| LOC114269624 | 0.075485 | 0.084996 | 0.116113 | 2.579693 | 2.809056 | 2.448409 | -4.90147 | 1.457047 | 487.1916 | 6.95E-38 | 3.01E-36 |
| LOC114269627 | 1.670443 | 1.475228 | 1.691434 | 0.535865 | 0.468802 | 0.315118 | 1.787321 | 0.06252  | 40.06374 | 9.68E-09 | 3.94E-08 |
| LOC114269642 | 1.725435 | 1.776307 | 1.760393 | 0.246442 | 0.22932  | 0.304899 | 2.629198 | 1.355858 | 189.6903 | 8.66E-24 | 1.28E-22 |
| LOC114269668 | 0.119262 | 0.111907 | 0.087359 | 1.95117  | 1.934582 | 1.939642 | -4.25263 | 0.657551 | 251.7897 | 1.07E-27 | 2.11E-26 |

|              |          |          |          |          |          |          |          |          |          |          |          |
|--------------|----------|----------|----------|----------|----------|----------|----------|----------|----------|----------|----------|
| LOC114269644 | 14.15143 | 13.9195  | 14.14757 | 1.607798 | 1.442567 | 2.120245 | 2.910693 | 3.516176 | 1029.429 | 9.86E-51 | 1.11E-48 |
| LOC114269650 | 1.95672  | 2.010477 | 1.854315 | 0.711394 | 0.385088 | 0.403397 | 1.891478 | 0.679077 | 68.69581 | 1.1E-12  | 6.43E-12 |
| LOC114269682 | 3.686434 | 3.591242 | 3.549822 | 1.618848 | 1.600694 | 1.508604 | 1.092038 | 1.942732 | 66.5934  | 2.02E-12 | 1.15E-11 |
| LOC114269706 | 0.00914  | 0.030874 | 0.020084 | 4.436014 | 4.055275 | 3.881522 | -7.71285 | 2.80776  | 1495.645 | 1.77E-57 | 3.47E-55 |
| LOC114269754 | 0.565114 | 0.526089 | 0.503576 | 0.113243 | 0.152852 | 0.122314 | 1.916863 | 1.224074 | 107.038  | 6.12E-17 | 5.1E-16  |
| LOC114269814 | 0.231085 | 0.197753 | 0.264059 | 0.537691 | 0.31752  | 0.660615 | -1.22737 | 0.322702 | 26.92594 | 1.4E-06  | 4.5E-06  |
| LOC114269817 | 2.116815 | 2.383529 | 2.071751 | 0.420369 | 0.305524 | 0.29338  | 2.599608 | 1.165463 | 158.9533 | 1.62E-21 | 1.97E-20 |
| LOC114269781 | 1.92001  | 1.701517 | 2.304928 | 3.393284 | 3.63868  | 4.202631 | -1.03627 | 2.302866 | 76.7973  | 1.15E-13 | 7.32E-13 |
| LOC114269803 | 0.934662 | 0.71565  | 0.965335 | 2.004876 | 1.926393 | 2.183818 | -1.3261  | 1.26511  | 65.51506 | 2.77E-12 | 1.56E-11 |
| LOC114269792 | 1.604695 | 1.708973 | 1.528639 | 0.445461 | 0.610968 | 0.564954 | 1.452817 | 2.062879 | 116.031  | 8.17E-18 | 7.34E-17 |
| LOC114269864 | 114.9144 | 110.0507 | 110.5479 | 339.3991 | 349.7103 | 351.8348 | -1.73895 | 8.710249 | 4707.176 | 1.1E-50  | 1.23E-48 |
| LOC114269844 | 0.471655 | 0.427816 | 0.38867  | 1.333708 | 1.631432 | 1.584591 | -1.92827 | 1.19788  | 122.6821 | 1.95E-18 | 1.84E-17 |
| LOC114269878 | 1.659823 | 1.367999 | 1.71091  | 0.466587 | 0.685766 | 0.493881 | 1.404654 | 0.978318 | 52.20296 | 1.63E-10 | 7.85E-10 |
| LOC114269894 | 0.805144 | 0.847141 | 0.638104 | 0.215942 | 0.151134 | 0.090704 | 2.255993 | 0.202197 | 61.53566 | 8.99E-12 | 4.84E-11 |
| LOC114269897 | 105.4962 | 99.31279 | 102.8476 | 216.7581 | 200.0383 | 211.4815 | -1.13524 | 7.946437 | 1548.685 | 5.17E-26 | 9.06E-25 |
| LOC114269917 | 0.231634 | 0.213398 | 0.393328 | 0.38279  | 0.753491 | 1.07084  | -1.55086 | -0.34387 | 24.69117 | 3.87E-06 | 1.18E-05 |
| LOC114269939 | 0.50969  | 0.43478  | 0.593958 | 1.881127 | 1.923267 | 1.995414 | -2.01676 | 1.285826 | 141.6119 | 4.18E-20 | 4.52E-19 |
| LOC114269973 | 2.895563 | 2.928832 | 2.75009  | 11.06252 | 11.44977 | 10.85975 | -2.06322 | 2.129849 | 256.2561 | 5.98E-28 | 1.21E-26 |
| LOC114269974 | 18.25822 | 18.38584 | 18.70192 | 72.31683 | 72.27253 | 76.43838 | -2.10331 | 5.841381 | 3046.843 | 1.09E-70 | 5.25E-68 |
| LOC114269976 | 0.313735 | 0.218688 | 0.213394 | 0.814734 | 0.833943 | 0.841861 | -1.82498 | 0.179547 | 54.29117 | 8.38E-11 | 4.14E-10 |
| LOC114269995 | 30.65367 | 29.74649 | 33.51717 | 0.270172 | 0.53181  | 0.408537 | 6.117199 | 3.659041 | 2187.976 | 1.7E-64  | 5.64E-62 |
| LOC114269950 | 13.15937 | 14.55105 | 11.76195 | 5.321838 | 6.602797 | 5.568124 | 1.059957 | 3.275457 | 146.1691 | 2.7E-18  | 2.52E-17 |
| LOC114269951 | 2.801058 | 2.821987 | 2.624093 | 1.393552 | 1.181639 | 1.13467  | 1.058792 | 1.086242 | 34.83988 | 6.37E-08 | 2.38E-07 |
| LOC114270021 | 3.457941 | 3.596976 | 4.269784 | 1.556513 | 1.602638 | 2.036826 | 1.00067  | 1.380801 | 37.79645 | 2.17E-08 | 8.52E-08 |
| LOC114270024 | 5.546198 | 6.101112 | 5.72877  | 1.393824 | 1.353522 | 1.791508 | 1.816296 | 2.127709 | 178.2005 | 5.7E-23  | 7.87E-22 |
| LOC114270036 | 0.535112 | 0.602535 | 0.477709 | 2.310252 | 2.967867 | 2.780949 | -2.43228 | 1.570769 | 226.9009 | 3.18E-26 | 5.68E-25 |



|              |          |          |          |          |          |          |          |          |          |          |          |
|--------------|----------|----------|----------|----------|----------|----------|----------|----------|----------|----------|----------|
| LOC114270057 | 0.621153 | 0.614122 | 0.466088 | 0.11016  | 0.065053 | 0.145756 | 2.275131 | -0.36597 | 40.70049 | 7.73E-09 | 3.18E-08 |
| LOC114270060 | 1.187369 | 0.831092 | 1.339871 | 0.350015 | 0.321521 | 0.176424 | 1.899513 | -0.39985 | 29.76956 | 4.32E-07 | 1.47E-06 |
| LOC114270116 | 0.966152 | 0.970276 | 1.377147 | 5.648612 | 5.606128 | 5.95751  | -2.4839  | 2.008979 | 309.3722 | 9.98E-31 | 2.5E-29  |
| LOC114270169 | 0.626499 | 0.623556 | 0.663776 | 0.122021 | 0.104082 | 0.092256 | 2.490355 | 1.073964 | 143.1647 | 3.09E-20 | 3.38E-19 |
| LOC114270213 | 4.115088 | 4.885244 | 4.348074 | 1.433961 | 1.524221 | 1.445566 | 1.488755 | 2.767431 | 196.8195 | 2.79E-24 | 4.28E-23 |
| LOC114270215 | 0.880847 | 0.927843 | 1.045874 | 0.154957 | 0.040669 | 0.019526 | 3.725014 | 0.259956 | 115.5712 | 9.03E-18 | 8.08E-17 |
| LOC114270229 | 0.641396 | 0.613197 | 0.651541 | 0        | 0        | 0.016633 | 6.221253 | -0.12236 | 127.0573 | 7.78E-19 | 7.6E-18  |
| LOC114270240 | 37.22726 | 38.09325 | 39.18577 | 12.70396 | 13.5305  | 12.16644 | 1.470041 | 5.654224 | 1280.942 | 7.54E-54 | 1.08E-51 |
| LOC114270298 | 0.446422 | 0.7181   | 0.490503 | 1.738962 | 1.46048  | 1.533906 | -1.61362 | 0.06921  | 39.48213 | 1.19E-08 | 4.78E-08 |
| LOC114270314 | 2.940641 | 2.76536  | 3.195499 | 6.226696 | 6.128364 | 6.062424 | -1.15265 | 3.107769 | 184.1421 | 2.13E-23 | 3.06E-22 |
| LOC114270335 | 0.724928 | 0.661838 | 0.602763 | 0        | 0        | 0        | 7.719231 | -0.67784 | 85.95063 | 1.24E-14 | 8.56E-14 |
| LOC114270346 | 0.011408 | 0.019268 | 0.025068 | 0.414744 | 0.416358 | 0.329254 | -4.42694 | 0.123652 | 172.5039 | 1.5E-22  | 1.98E-21 |
| LOC114270369 | 3.474304 | 3.165679 | 3.658306 | 10.62306 | 10.6216  | 10.92195 | -1.74847 | 4.833876 | 1134.197 | 1.82E-52 | 2.32E-50 |
| LOC114270378 | 3.357118 | 2.933363 | 3.482043 | 0.097642 | 0.03844  | 0.110737 | 5.148142 | 0.99096  | 276.1002 | 4.92E-29 | 1.08E-27 |
| LOC114270379 | 284.9145 | 281.0179 | 284.8208 | 617.9564 | 626.3931 | 653.6282 | -1.26294 | 8.894625 | 2772.426 | 1.57E-27 | 3.06E-26 |
| LOC114270418 | 1.750942 | 1.460412 | 1.425061 | 2.986424 | 3.403356 | 2.88185  | -1.10182 | 2.715992 | 115.8763 | 8.45E-18 | 7.59E-17 |
| LOC114270452 | 1.901166 | 1.569853 | 1.636298 | 0.518397 | 0.634929 | 0.435494 | 1.576511 | 0.216825 | 36.75842 | 3.16E-08 | 1.22E-07 |
| LOC114270453 | 3.482408 | 2.480749 | 2.733048 | 1.09813  | 0.81377  | 1.367492 | 1.301015 | 0.838306 | 40.16009 | 9.35E-09 | 3.81E-08 |
| LOC114270459 | 0.442929 | 0.434384 | 0.345375 | 1.480468 | 1.329273 | 1.256799 | -1.82121 | 0.927926 | 91.93793 | 2.25E-15 | 1.66E-14 |
| LOC114270507 | 0.625723 | 0.407905 | 0.651323 | 2.574234 | 2.733911 | 2.806293 | -2.36005 | 0.61761  | 114.0555 | 1.26E-17 | 1.11E-16 |
| LOC114270496 | 9.95192  | 7.348946 | 8.544238 | 3.281589 | 3.378833 | 3.689857 | 1.212127 | 1.999454 | 79.12615 | 6.14E-14 | 4E-13    |
| LOC114270515 | 22.1744  | 19.54949 | 21.59808 | 120.5908 | 118.7924 | 114.9864 | -2.58871 | 5.86057  | 4160.046 | 2.87E-76 | 2.22E-73 |
| LOC114270523 | 2.57698  | 2.476095 | 2.114139 | 0.874438 | 0.934397 | 0.519464 | 1.532224 | 0.571148 | 44.50945 | 2.07E-09 | 8.99E-09 |
| LOC114270563 | 0.170383 | 0.109629 | 0.106976 | 0.486713 | 0.435479 | 0.367989 | -1.79612 | -0.44291 | 32.68823 | 1.42E-07 | 5.11E-07 |
| LOC114270560 | 0.950279 | 1.364653 | 1.316488 | 0.275389 | 0.236544 | 0.24607  | 2.146757 | 0.767194 | 87.21109 | 7.4E-15  | 5.23E-14 |
| LOC114270652 | 0.303612 | 0.20512  | 0.333591 | 0.524317 | 0.695292 | 1.001482 | -1.52436 | 0.0988   | 35.05267 | 6.01E-08 | 2.25E-07 |

|              |          |          |          |          |          |          |          |          |          |          |          |
|--------------|----------|----------|----------|----------|----------|----------|----------|----------|----------|----------|----------|
| LOC114270653 | 1.891051 | 1.573845 | 1.309903 | 0.709938 | 0.529561 | 0.593264 | 1.295403 | 0.772472 | 38.42751 | 1.73E-08 | 6.87E-08 |
| LOC114270742 | 5.883481 | 5.404431 | 6.145458 | 10.65994 | 11.93895 | 12.44858 | -1.11897 | 3.788146 | 279.9666 | 3.07E-29 | 6.89E-28 |
| LOC114270746 | 2.827985 | 2.716025 | 2.624169 | 0.431998 | 0.408169 | 0.440937 | 2.563552 | 2.02204  | 288.5018 | 1.1E-29  | 2.56E-28 |
| LOC114270763 | 0.156764 | 0.215741 | 0.191381 | 7.789142 | 7.429296 | 7.588844 | -5.43014 | 2.787622 | 1309.912 | 4.58E-55 | 7.04E-53 |
| LOC114270797 | 0.070902 | 0.119754 | 0.155807 | 0.869992 | 0.837226 | 0.682137 | -2.86714 | -0.31221 | 75.64274 | 1.58E-13 | 9.91E-13 |
| LOC114270804 | 5.255164 | 5.179689 | 4.846378 | 0.661562 | 0.854262 | 0.820306 | 2.585337 | 2.608983 | 428.427  | 8.46E-36 | 3.11E-34 |
| LOC114270860 | 9.179738 | 6.516404 | 9.428368 | 0.725527 | 1.713767 | 1.737072 | 2.425564 | 1.211381 | 135.9122 | 8.74E-19 | 8.52E-18 |
| LOC114270888 | 10.81915 | 10.42316 | 10.32106 | 19.56079 | 19.59429 | 20.80167 | -1.03149 | 4.575122 | 355.9383 | 7.15E-33 | 2.08E-31 |
| LOC114270889 | 26.54617 | 24.81755 | 27.84303 | 66.41096 | 68.67908 | 72.14179 | -1.49386 | 5.671555 | 1406.639 | 2.33E-56 | 4.09E-54 |
| LOC114270964 | 0.543719 | 1.611123 | 0.911832 | 7.542933 | 7.044945 | 7.236889 | -2.95362 | 2.155189 | 218.9834 | 4.34E-11 | 2.19E-10 |
| LOC114270945 | 1.182736 | 0.902636 | 1.082935 | 2.627782 | 2.445214 | 2.474452 | -1.3471  | 2.060092 | 112.2269 | 1.89E-17 | 1.64E-16 |
| LOC114270946 | 11.09413 | 11.83449 | 11.45637 | 3.10847  | 2.865371 | 2.923444 | 1.847558 | 3.374205 | 496.1666 | 3.49E-38 | 1.54E-36 |
| LOC114270934 | 3.124954 | 3.958528 | 3.494831 | 8.115156 | 6.908756 | 7.899615 | -1.22068 | 2.615237 | 130.8362 | 3.57E-19 | 3.59E-18 |
| LOC114270957 | 8.907791 | 8.102962 | 8.818598 | 4.40764  | 3.581778 | 3.368125 | 1.096103 | 3.841323 | 247.719  | 3.12E-26 | 5.58E-25 |
| LOC114270958 | 0.075554 | 0.099253 | 0.041507 | 1.808361 | 1.477912 | 1.453781 | -4.50931 | 0.999457 | 322.4546 | 2.36E-31 | 6.18E-30 |
| LOC114270993 | 1.529534 | 1.44145  | 1.625762 | 0.46844  | 0.666281 | 0.685497 | 1.205589 | 1.98244  | 78.60976 | 7.05E-14 | 4.56E-13 |
| LOC114271020 | 9.001272 | 7.890028 | 8.855419 | 4.128436 | 3.567723 | 3.578174 | 1.096181 | 2.75411  | 114.6734 | 1.1E-17  | 9.76E-17 |
| LOC114271050 | 0.108394 | 0.081367 | 0.039699 | 1.379285 | 1.551432 | 1.241471 | -4.17169 | -0.64001 | 93.41943 | 1.56E-15 | 1.16E-14 |
| LOC114271197 | 2.505968 | 1.985651 | 2.345499 | 0.787353 | 1.062747 | 0.722857 | 1.298641 | 0.699715 | 37.35073 | 2.55E-08 | 9.94E-08 |
| LOC114271205 | 3.773147 | 2.909969 | 3.379041 | 1.17447  | 0.77678  | 0.49727  | 1.985924 | 1.33338  | 110.7757 | 9.08E-17 | 7.47E-16 |
| LOC114271209 | 2.042948 | 1.857979 | 2.244673 | 0.428506 | 0.393623 | 0.64796  | 1.926357 | 0.108861 | 46.83413 | 9.46E-10 | 4.23E-09 |
| LOC114271211 | 6.14416  | 6.180696 | 5.360965 | 17.08198 | 17.29719 | 17.23057 | -1.64956 | 3.971549 | 631.237  | 3.3E-42  | 1.95E-40 |
| LOC114271266 | 2.524271 | 1.539592 | 2.657959 | 0.191195 | 0.07527  | 0.072278 | 4.199163 | -0.34157 | 81.23502 | 3.5E-14  | 2.33E-13 |
| LOC114271222 | 1.154307 | 0.718281 | 0.73427  | 2.650515 | 2.782568 | 2.797213 | -1.74688 | 0.880799 | 81.14706 | 3.58E-14 | 2.38E-13 |
| LOC114271223 | 0.478309 | 0.269288 | 0.291966 | 9.081246 | 11.25787 | 11.90603 | -5.03622 | 2.690413 | 1043.456 | 1.19E-47 | 1.02E-45 |
| LOC114271225 | 2.679298 | 2.753197 | 2.76223  | 0.813834 | 1.330863 | 0.833042 | 1.338873 | 3.028896 | 136.6269 | 2.11E-12 | 1.2E-11  |

|              |          |          |          |          |          |          |          |          |          |          |          |
|--------------|----------|----------|----------|----------|----------|----------|----------|----------|----------|----------|----------|
| LOC114271273 | 1.964289 | 2.333312 | 2.229397 | 5.257993 | 4.603396 | 5.04343  | -1.29521 | 2.342379 | 124.6209 | 1.29E-18 | 1.24E-17 |
| LOC114271282 | 1.471899 | 1.493441 | 1.688324 | 0.441041 | 0.740823 | 0.711377 | 1.154956 | 1.088845 | 39.699   | 1.1E-08  | 4.45E-08 |
| LOC114271317 | 1.826272 | 1.953559 | 1.705611 | 3.485828 | 3.572368 | 3.263036 | -1.01451 | 1.41735  | 44.1435  | 2.35E-09 | 1.01E-08 |
| LOC114271318 | 0.690309 | 0.540721 | 0.494655 | 2.509717 | 1.718319 | 2.021272 | -1.92423 | 0.453388 | 70.57023 | 6.47E-13 | 3.85E-12 |
| LOC114271432 | 0.239155 | 0.269288 | 0.394154 | 2.825813 | 3.537101 | 4.546935 | -3.70481 | 0.609733 | 199.6226 | 1.81E-24 | 2.8E-23  |
| LOC114271421 | 5.499291 | 4.818496 | 5.526746 | 1.484156 | 1.477508 | 1.483269 | 1.728569 | 3.432622 | 455.0643 | 9E-37    | 3.59E-35 |
| LOC114271468 | 2.169358 | 1.943456 | 2.139988 | 0.201493 | 0.38529  | 0.282922 | 2.700903 | 1.239944 | 176.4918 | 7.6E-23  | 1.04E-21 |
| LOC114271510 | 2.418879 | 2.30818  | 2.387446 | 0.447162 | 0.64548  | 0.507128 | 2.01971  | 0.231308 | 56.04475 | 4.83E-11 | 2.43E-10 |
| LOC114271474 | 1.308256 | 0.95751  | 1.269734 | 0.198181 | 0.156041 | 0.179807 | 2.616419 | 0.067175 | 70.36232 | 6.86E-13 | 4.08E-12 |
| LOC114271524 | 3.569821 | 3.625531 | 3.345501 | 0.381723 | 0.400742 | 0.384813 | 3.050527 | 0.840545 | 157.3433 | 2.17E-21 | 2.62E-20 |
| LOC114271566 | 0.428845 | 0.300458 | 0.35601  | 0.086618 | 0.1364   | 0.196468 | 1.219264 | -0.16367 | 17.09859 | 8.01E-05 | 0.000204 |
| LOC114271578 | 5.875873 | 5.165605 | 5.454859 | 16.05049 | 14.52651 | 15.67655 | -1.58622 | 3.350774 | 410.7316 | 4E-35    | 1.39E-33 |
| LOC114271626 | 4.256416 | 3.158835 | 3.666959 | 26.20166 | 21.94566 | 24.99553 | -2.8127  | 3.159602 | 840.2732 | 3.82E-47 | 3.13E-45 |
| LOC114271624 | 5.59845  | 5.42482  | 5.906181 | 0.081091 | 0.063849 | 0.214588 | 5.363782 | 1.98574  | 565.4672 | 2.36E-40 | 1.21E-38 |
| LOC114271684 | 1.382454 | 1.39872  | 1.232779 | 0.509895 | 0.315444 | 0.302906 | 1.759236 | 0.472222 | 52.80547 | 1.34E-10 | 6.53E-10 |
| LOC114271692 | 2.312841 | 2.098391 | 2.06588  | 1.119139 | 0.643018 | 0.754672 | 1.29327  | 1.482257 | 62.83671 | 6.1E-12  | 3.33E-11 |
| LOC114271702 | 0.342426 | 0.416011 | 0.475248 | 1.539793 | 1.560618 | 1.486201 | -2.00242 | 1.725729 | 184.7781 | 1.92E-23 | 2.76E-22 |
| LOC114271708 | 1.077236 | 1.081834 | 0.991668 | 0.2117   | 0.187521 | 0.24009  | 2.181349 | 0.500017 | 77.40791 | 9.75E-14 | 6.24E-13 |
| LOC114271731 | 2.189039 | 2.02195  | 2.724627 | 0.777203 | 0.783288 | 0.564115 | 1.610008 | 1.457007 | 90.04591 | 3.61E-15 | 2.62E-14 |
| LOC114271763 | 0.565622 | 0.509511 | 0.279662 | 0.976789 | 0.78933  | 0.835694 | -1.02154 | 0.544402 | 22.50255 | 8.08E-06 | 2.36E-05 |
| LOC114271751 | 1.867614 | 1.59584  | 1.775511 | 0        | 0        | 0        | 9.674757 | 1.07137  | 351.6692 | 2.49E-32 | 7.01E-31 |
| LOC114271753 | 80.97482 | 84.58439 | 75.5804  | 10.38432 | 10.59508 | 9.127104 | 2.898989 | 5.804006 | 2627.803 | 8.78E-23 | 1.19E-21 |
| LOC114271778 | 1.699127 | 1.600851 | 1.447801 | 0.315174 | 0.64521  | 0.38127  | 1.68098  | -0.02083 | 33.56182 | 1.02E-07 | 3.74E-07 |
| LOC114271789 | 0.655076 | 0.582327 | 0.7387   | 0.188023 | 0.074021 | 0.142158 | 2.203861 | -0.32998 | 40.11627 | 9.5E-09  | 3.87E-08 |
| LOC114271792 | 0.678569 | 1.018756 | 1.049324 | 0.091372 | 0.107914 | 0.034542 | 3.404034 | -0.50781 | 58.64365 | 2.16E-11 | 1.13E-10 |
| LOC114271796 | 1.63969  | 1.67673  | 2.040583 | 0.395394 | 0.31132  | 0.390929 | 2.17818  | 1.026026 | 111.5641 | 2.2E-17  | 1.9E-16  |

|              |          |          |          |          |          |          |          |          |          |          |          |
|--------------|----------|----------|----------|----------|----------|----------|----------|----------|----------|----------|----------|
| LOC114271823 | 0.346362 | 0.390003 | 0.492492 | 0.888881 | 1.049813 | 1.120094 | -1.43447 | 0.15009  | 34.31035 | 7.75E-08 | 2.87E-07 |
| LOC114271911 | 0.361313 | 0.162735 | 0.344058 | 2.495848 | 2.0341   | 2.085671 | -2.9906  | 0.666008 | 161.2359 | 1.08E-21 | 1.33E-20 |
| LOC114271837 | 1.007543 | 1.224056 | 1.034199 | 0.602478 | 0.436421 | 0.437295 | 1.058071 | 0.912491 | 29.83638 | 4.21E-07 | 1.43E-06 |
| LOC114271860 | 0.212021 | 0.14921  | 0.058239 | 0.81901  | 1.251789 | 1.238457 | -3.05274 | -0.41803 | 74.57236 | 2.12E-13 | 1.32E-12 |
| LOC114271863 | 1.476019 | 1.968823 | 1.871265 | 3.673836 | 3.18517  | 3.713971 | -1.10021 | 1.840654 | 65.42671 | 2.84E-12 | 1.6E-11  |
| LOC114271929 | 2.702736 | 2.952431 | 2.260448 | 0        | 0        | 0.055442 | 6.53687  | 0.157563 | 158.1865 | 1.86E-21 | 2.25E-20 |
| LOC114271881 | 35.53399 | 35.55307 | 37.42273 | 11.08194 | 11.57083 | 12.3404  | 1.523893 | 5.421972 | 1268.79  | 1.73E-54 | 2.56E-52 |
| LOC114271940 | 0.431311 | 0.498781 | 0.53794  | 0.02119  | 0.016685 | 0        | 5.069153 | -0.38957 | 91.57239 | 2.46E-15 | 1.81E-14 |
| LOC114271986 | 5.346763 | 5.498439 | 5.535132 | 0        | 0.088471 | 0        | 7.14295  | 1.473147 | 440.4683 | 3.03E-36 | 1.17E-34 |
| LOC114271949 | 0.462035 | 0.361698 | 0.488318 | 0.103987 | 0.13856  | 0.090717 | 1.864984 | 0.983568 | 83.12652 | 2.13E-14 | 1.44E-13 |
| LOC114271954 | 4.620986 | 4.532777 | 5.447043 | 0        | 0        | 0.01779  | 9.056105 | 2.506624 | 929.6492 | 6.36E-49 | 6.06E-47 |
| LOC114271989 | 0.259771 | 0.130001 | 0.137425 | 1.434144 | 1.308216 | 1.362003 | -3.02813 | 1.298695 | 251.872  | 1.06E-27 | 2.09E-26 |
| LOC114272054 | 0.508656 | 0.631995 | 0.655241 | 5.292801 | 5.422607 | 4.676717 | -3.20303 | 2.328759 | 542.234  | 1.19E-39 | 5.83E-38 |
| LOC114272045 | 0.283791 | 0.377648 | 0.311813 | 1.031764 | 0.849303 | 0.921919 | -1.61597 | -0.35738 | 29.29555 | 5.19E-07 | 1.75E-06 |
| LOC114272035 | 0.764991 | 1.144018 | 0.906194 | 0.325926 | 0.119757 | 0.36142  | 1.697083 | 0.694407 | 50.62439 | 1.15E-09 | 5.13E-09 |
| LOC114272106 | 0.841838 | 0.923603 | 0.569208 | 1.844221 | 1.606554 | 1.275691 | -1.09899 | 0.759567 | 30.37762 | 3.42E-07 | 1.18E-06 |
| LOC114272125 | 4.286719 | 4.627498 | 4.97398  | 1.655042 | 1.972786 | 2.050786 | 1.168847 | 2.962167 | 148.5189 | 1.11E-20 | 1.26E-19 |
| LOC114272116 | 3.481787 | 3.146704 | 3.385139 | 1.478217 | 1.22947  | 1.463944 | 1.16296  | 2.645898 | 118.0617 | 5.25E-18 | 4.78E-17 |
| LOC114272121 | 0.808717 | 0.752246 | 0.888571 | 1.470103 | 1.786591 | 1.42562  | -1.04178 | 1.069117 | 35.97747 | 4.2E-08  | 1.6E-07  |
| LOC114272241 | 1.524797 | 1.533968 | 1.689091 | 0.795191 | 0.608218 | 0.687108 | 1.088758 | 1.499353 | 48.79458 | 4.94E-10 | 2.27E-09 |
| LOC114272264 | 2.930618 | 3.126193 | 3.204586 | 7.366515 | 6.803632 | 7.458252 | -1.32931 | 3.490176 | 328.0159 | 1.29E-31 | 3.44E-30 |
| LOC114272266 | 0.22157  | 0.170702 | 0.153757 | 1.780686 | 1.81933  | 1.522627 | -3.3073  | 1.312225 | 293.6344 | 6.04E-30 | 1.42E-28 |
| LOC114272270 | 19.02074 | 16.62264 | 19.44803 | 2.400384 | 2.187282 | 2.528566 | 2.846144 | 4.369066 | 1615.557 | 6.85E-59 | 1.48E-56 |
| LOC114272291 | 2.2814   | 2.279855 | 2.705114 | 0.138239 | 0.149662 | 0.169843 | 3.857059 | 2.050668 | 464.2987 | 4.25E-37 | 1.73E-35 |
| LOC114272309 | 0.36088  | 0.293475 | 0.506657 | 3.826758 | 2.582623 | 3.058627 | -3.10491 | 1.432009 | 275.3929 | 1.54E-28 | 3.25E-27 |
| LOC114272311 | 0.407898 | 0.229646 | 0.504197 | 1.529316 | 2.079864 | 1.857038 | -2.36088 | 0.427498 | 95.82754 | 8.64E-16 | 6.56E-15 |

|              |          |          |          |          |          |          |          |          |          |          |          |
|--------------|----------|----------|----------|----------|----------|----------|----------|----------|----------|----------|----------|
| LOC114272304 | 1.796577 | 1.563182 | 1.166439 | 3.117407 | 2.571425 | 3.142636 | -1.0512  | -0.18913 | 14.70759 | 0.000234 | 0.000557 |
| LOC114272295 | 0.687149 | 0.591674 | 0.91044  | 1.506284 | 1.619899 | 1.888834 | -1.30964 | 0.885002 | 48.21951 | 5.97E-10 | 2.73E-09 |
| LOC114272297 | 7.054807 | 7.362451 | 6.144411 | 0.31279  | 0.36942  | 0.561666 | 3.89939  | 2.359404 | 557.0345 | 4.22E-40 | 2.14E-38 |
| LOC114272342 | 2.855979 | 2.789236 | 2.75374  | 1.059522 | 0.917655 | 1.081448 | 1.351366 | 1.047255 | 53.08098 | 1.23E-10 | 6E-10    |
| LOC114272345 | 0.945091 | 0.940951 | 0.972827 | 0.289349 | 0.327496 | 0.246114 | 1.620337 | 0.981904 | 68.68148 | 1.11E-12 | 6.45E-12 |
| LOC114272406 | 11.49169 | 11.83597 | 11.68753 | 4.717061 | 4.838164 | 4.879011 | 1.171687 | 5.288915 | 755.0307 | 2.79E-45 | 2.01E-43 |
| LOC114272408 | 9.083621 | 9.850715 | 7.918151 | 2.741912 | 2.062939 | 2.027008 | 1.888697 | 2.3493   | 208.4539 | 5.39E-25 | 8.73E-24 |
| LOC114272427 | 0.407898 | 0.516704 | 0.392153 | 1.204915 | 0.875732 | 1.016115 | -1.31937 | -0.1258  | 23.73318 | 4.77E-06 | 1.44E-05 |
| LOC114272449 | 0.423004 | 0.426165 | 0.57485  | 0.161883 | 0.095596 | 0.198892 | 1.52277  | -0.08078 | 26.73422 | 1.42E-06 | 4.57E-06 |
| LOC114272457 | 0.61388  | 0.601067 | 0.703821 | 0.242592 | 0.324715 | 0.256783 | 1.09601  | 0.171714 | 18.85169 | 3.73E-05 | 9.98E-05 |
| LOC114272478 | 2.15102  | 2.313917 | 2.342314 | 6.354027 | 5.6077   | 5.807139 | -1.48494 | 2.70817  | 211.3579 | 3.04E-25 | 5.05E-24 |
| LOC114272522 | 14.4672  | 14.02998 | 13.83357 | 33.26442 | 32.94431 | 33.42615 | -1.33973 | 4.79585  | 688.8147 | 1.07E-43 | 7E-42    |
| LOC114272527 | 2.178482 | 1.674479 | 2.006601 | 0.711394 | 0.690824 | 0.699222 | 1.37704  | 1.653532 | 81.61882 | 3.16E-14 | 2.12E-13 |
| LOC114272558 | 0.753751 | 0.57825  | 0.673463 | 1.204559 | 1.232958 | 1.423016 | -1.05022 | 1.860074 | 61.61349 | 8.79E-12 | 4.73E-11 |
| LOC114272590 | 0.083089 | 0.062372 | 0.091293 | 1.40971  | 1.268524 | 1.712956 | -4.2453  | -0.20821 | 132.1737 | 2.72E-19 | 2.76E-18 |
| LOC114272591 | 20.76633 | 22.0993  | 23.68813 | 8.288671 | 7.377467 | 9.400219 | 1.297815 | 3.213207 | 223.0643 | 5.49E-26 | 9.6E-25  |
| LOC114272564 | 0.360626 | 0.358292 | 0.419543 | 0.115686 | 0.106268 | 0.116622 | 1.630402 | -0.32649 | 25.72328 | 2.13E-06 | 6.7E-06  |
| LOC114272607 | 121.9211 | 116.6493 | 116.2522 | 49.53514 | 49.21657 | 50.82236 | 1.140796 | 7.097576 | 1332.355 | 4.16E-34 | 1.33E-32 |
| LOC114272617 | 0.567907 | 0.503819 | 0.378172 | 1.313904 | 1.921259 | 1.655672 | -1.86493 | 0.930688 | 92.35744 | 2.03E-15 | 1.5E-14  |
| LOC114272618 | 2.769931 | 1.512211 | 2.582311 | 1.068081 | 1.321526 | 0.807544 | 1.007762 | 0.374826 | 17.16459 | 8.31E-05 | 0.000211 |
| LOC114272632 | 0.091536 | 0.103069 | 0.100574 | 0.715499 | 0.864692 | 0.98129  | -3.22438 | 0.683321 | 185.6889 | 1.65E-23 | 2.4E-22  |
| LOC114272634 | 7.68411  | 7.594437 | 8.119312 | 0.178428 | 0.120418 | 0.19272  | 5.45469  | 3.08394  | 1340.318 | 1.76E-55 | 2.81E-53 |
| LOC114272633 | 2.158399 | 1.67284  | 2.309925 | 21.75805 | 20.58195 | 20.76552 | -3.4577  | 3.669697 | 1679.721 | 1.32E-59 | 2.95E-57 |
| LOC114272668 | 0.707834 | 0.654694 | 0.555519 | 2.527476 | 2.641339 | 2.918539 | -2.17718 | 1.02535  | 134.371  | 1.75E-19 | 1.81E-18 |
| LOC114272685 | 4.568442 | 4.643761 | 4.85681  | 1.843168 | 2.021965 | 1.753698 | 1.216513 | 3.118608 | 189.5296 | 8.88E-24 | 1.31E-22 |
| LOC114272700 | 12.09859 | 11.5645  | 12.54844 | 5.75031  | 4.762801 | 5.928593 | 1.036433 | 3.681325 | 211.6214 | 2.92E-25 | 4.86E-24 |

|              |          |          |          |          |          |          |          |          |          |          |          |
|--------------|----------|----------|----------|----------|----------|----------|----------|----------|----------|----------|----------|
| LOC114272699 | 124.1618 | 123.0284 | 123.5077 | 46.46649 | 45.35518 | 47.57181 | 1.305804 | 7.091146 | 1756.572 | 7.22E-44 | 4.79E-42 |
| LOC114272708 | 0.572679 | 0.644836 | 0.513317 | 0.054791 | 0.086281 | 0.093208 | 2.725909 | 0.508585 | 103.8532 | 1.28E-16 | 1.04E-15 |
| LOC114272710 | 37.8535  | 36.98702 | 37.21025 | 12.89241 | 13.72091 | 14.4581  | 1.339336 | 5.483317 | 1029.948 | 9.66E-51 | 1.09E-48 |
| LOC114272715 | 0.83778  | 0.898418 | 1.256561 | 0.096694 | 0.0571   | 0.109661 | 3.37116  | 0.424901 | 120.1759 | 3.33E-18 | 3.09E-17 |
| LOC114272742 | 1.783437 | 1.81477  | 1.785356 | 0        | 0.018908 | 0        | 7.589005 | 1.115759 | 351.5751 | 1.11E-32 | 3.19E-31 |
| LOC114272747 | 7.138625 | 7.126695 | 7.027081 | 2.412034 | 2.241003 | 1.823666 | 1.624553 | 3.387602 | 387.1643 | 3.46E-34 | 1.12E-32 |
| LOC114272832 | 1.014503 | 1.142328 | 0.723034 | 12.75977 | 12.40129 | 12.20984 | -3.79511 | 2.916439 | 1018.684 | 1.52E-50 | 1.66E-48 |
| LOC114272838 | 1.583889 | 1.159246 | 2.349385 | 3.455073 | 3.117135 | 3.265345 | -1.04779 | 0.962117 | 31.46037 | 2.43E-07 | 8.51E-07 |
| LOC114272853 | 17.28945 | 16.50032 | 16.76379 | 34.48834 | 33.42674 | 35.45844 | -1.13697 | 5.624717 | 865.6716 | 1.15E-47 | 9.89E-46 |
| LOC114272945 | 3.36786  | 3.016021 | 3.895167 | 1.646899 | 1.804123 | 1.163964 | 1.058699 | 1.951454 | 57.138   | 4.65E-11 | 2.34E-10 |
| LOC114272921 | 2.114631 | 2.202489 | 2.120133 | 0        | 0        | 0        | 8.972822 | 0.428745 | 214.8309 | 3.1E-25  | 5.14E-24 |
| LOC114272889 | 0.452164 | 0.436402 | 0.532298 | 1.643906 | 1.201902 | 1.464855 | -1.68333 | -0.09998 | 38.1161  | 1.94E-08 | 7.64E-08 |
| LOC114272935 | 6.667034 | 5.937792 | 6.373467 | 0.82166  | 0.593035 | 0.517693 | 3.213768 | 1.525968 | 271.6896 | 8.46E-29 | 1.83E-27 |
| LOC114272952 | 6.945566 | 6.664325 | 6.562396 | 0.049128 | 0.038681 | 0        | 7.637758 | 1.940008 | 638.0532 | 2.17E-42 | 1.29E-40 |
| LOC114272957 | 0.877249 | 0.889002 | 1.03616  | 0.059801 | 0.06278  | 0        | 4.422484 | 0.542378 | 166.0857 | 6.09E-22 | 7.69E-21 |
| LOC114272972 | 0.703184 | 0.698632 | 0.590825 | 1.372252 | 1.198872 | 1.492321 | -1.13021 | 1.587591 | 59.91836 | 1.47E-11 | 7.75E-11 |
| LOC114272978 | 0.616017 | 0.462422 | 0.676843 | 0.023329 | 0.165319 | 0.141109 | 2.204888 | -0.10956 | 45.28353 | 1.73E-09 | 7.57E-09 |
| LOC114272977 | 0.650202 | 0.53016  | 0.648711 | 2.404658 | 2.438888 | 2.547379 | -2.11677 | 2.659583 | 379.2017 | 7.35E-34 | 2.31E-32 |
| LOC114272994 | 1.445332 | 1.513898 | 1.624978 | 0.336057 | 0.408927 | 0.415771 | 1.852268 | 0.86225  | 78.66038 | 6.95E-14 | 4.5E-13  |
| LOC114272992 | 0.487058 | 0.485886 | 0.46943  | 0.093198 | 0.036691 | 0.105697 | 2.511797 | 1.052612 | 134.035  | 1.87E-19 | 1.93E-18 |
| LOC114273039 | 0.530208 | 0.398009 | 0.582562 | 1.204779 | 0.948603 | 1.275256 | -1.2746  | 0.230246 | 28.92157 | 6.01E-07 | 2.01E-06 |
| LOC114273079 | 0.564839 | 0.591635 | 0.519582 | 0.119393 | 0.056403 | 0.162484 | 2.180697 | -0.19224 | 43.8718  | 2.58E-09 | 1.11E-08 |
| LOC114273069 | 335.8577 | 323.5291 | 329.8921 | 72.65915 | 71.11072 | 71.70693 | 2.093421 | 7.570654 | 4677.147 | 8.62E-79 | 8.3E-76  |
| LOC114273083 | 7.063253 | 6.765391 | 7.659903 | 1.875935 | 2.002221 | 1.859598 | 1.795839 | 2.583734 | 241.8283 | 4.03E-27 | 7.64E-26 |
| LOC114273091 | 4.145446 | 4.584036 | 4.963274 | 1.013769 | 1.223918 | 1.814002 | 1.617431 | 2.278476 | 147.4176 | 1.11E-19 | 1.17E-18 |
| LOC114273093 | 2.38388  | 2.578979 | 2.482313 | 0.50982  | 0.490618 | 0.578189 | 2.120584 | 1.582946 | 163.2099 | 7.57E-22 | 9.46E-21 |

|              |          |          |          |          |          |          |          |          |          |          |          |
|--------------|----------|----------|----------|----------|----------|----------|----------|----------|----------|----------|----------|
| LOC114273096 | 15.2851  | 14.46088 | 15.46149 | 2.969677 | 2.754937 | 2.734354 | 2.31692  | 4.038731 | 1070.51  | 1.97E-51 | 2.38E-49 |
| LOC114273097 | 11.1448  | 11.38033 | 11.75918 | 3.062085 | 3.214644 | 3.601344 | 1.680234 | 3.693639 | 524.1883 | 4.33E-39 | 2.05E-37 |
| LOC114273118 | 19.43634 | 18.49763 | 19.72893 | 2.691119 | 2.2556   | 2.362847 | 2.881992 | 2.771624 | 574.7834 | 1.26E-40 | 6.62E-39 |
| LOC114273183 | 1.208299 | 0.944049 | 0.894103 | 2.779208 | 2.752966 | 1.999601 | -1.3873  | 1.141295 | 62.0882  | 7.62E-12 | 4.13E-11 |
| LOC114273186 | 0        | 0        | 0.01353  | 0.984962 | 1.03991  | 0.863175 | -7.33926 | 0.262278 | 251.8298 | 1.06E-27 | 2.1E-26  |
| LOC114273211 | 1.320375 | 1.629303 | 1.132778 | 0.72335  | 0.517765 | 0.522044 | 1.125127 | 0.77542  | 29.44972 | 4.89E-07 | 1.65E-06 |
| LOC114273227 | 0.900017 | 0.705544 | 0.738535 | 0.103549 | 0.195674 | 0.203554 | 2.066948 | 0.448833 | 66.59841 | 2.02E-12 | 1.15E-11 |
| LOC114273237 | 2.480723 | 2.875444 | 2.244673 | 1.45896  | 0.574368 | 0.651817 | 1.45988  | 0.589925 | 38.54682 | 2.23E-08 | 8.74E-08 |
| LOC114273309 | 0.374942 | 0.333303 | 0.357758 | 0.914749 | 0.974446 | 0.949274 | -1.51481 | 1.0292   | 72.50312 | 3.76E-13 | 2.28E-12 |
| LOC114273310 | 1.528164 | 1.756558 | 1.049411 | 3.154108 | 2.415087 | 2.778533 | -1.03838 | 2.025528 | 57.43834 | 1.76E-10 | 8.45E-10 |
| LOC114273367 | 9.12353  | 9.73592  | 9.347373 | 17.95799 | 17.52504 | 18.4949  | -1.04251 | 4.394771 | 328.7928 | 1.19E-31 | 3.17E-30 |
| LOC114273469 | 9.309936 | 10.009   | 9.766724 | 19.84946 | 17.68428 | 17.69601 | -1.02675 | 4.114607 | 271.2668 | 8.92E-29 | 1.92E-27 |
| LOC114273438 | 62.54956 | 60.61027 | 63.48528 | 25.4843  | 23.16185 | 25.16768 | 1.233866 | 6.243282 | 1236.81  | 1.21E-53 | 1.69E-51 |
| LOC114273443 | 0.492036 | 0.587609 | 0.73721  | 0.433665 | 0.213408 | 0.16394  | 1.1163   | -0.04532 | 15.09533 | 0.000199 | 0.000479 |
| LOC114273481 | 9.338355 | 9.590039 | 10.83046 | 21.69087 | 25.12296 | 26.32288 | -1.41331 | 3.603431 | 368.4427 | 1.1E-32  | 3.17E-31 |
| LOC114273484 | 1.190244 | 1.307524 | 1.403461 | 0.474948 | 0.45706  | 0.359094 | 1.490828 | -0.0076  | 28.2415  | 7.84E-07 | 2.59E-06 |
| LOC114273491 | 283.1385 | 272.6744 | 284.4511 | 51.17108 | 50.27731 | 44.09501 | 2.424398 | 7.142652 | 2676.671 | 1.26E-19 | 1.32E-18 |
| LOC114273572 | 1.9978   | 2.155789 | 1.737761 | 4.161259 | 3.991294 | 4.404683 | -1.19633 | 1.19191  | 51.63934 | 1.95E-10 | 9.35E-10 |
| LOC114273538 | 3.693175 | 3.575787 | 3.851077 | 0.769704 | 0.572371 | 0.54962  | 2.468489 | 1.519163 | 193.5898 | 4.65E-24 | 6.99E-23 |
| LOC114273570 | 3.650956 | 3.206162 | 3.742748 | 1.683013 | 1.575176 | 1.488556 | 1.060217 | 2.161934 | 71.35693 | 5.18E-13 | 3.11E-12 |
| LOC114273633 | 0.21359  | 0.279502 | 0.37422  | 0        | 0        | 0        | 8.26868  | -0.19705 | 120.3067 | 1.74E-17 | 1.52E-16 |
| LOC114273639 | 4.491468 | 4.904789 | 4.605256 | 0.070385 | 0.027709 | 0.013304 | 6.9222   | 2.864871 | 1179.724 | 3.57E-53 | 4.87E-51 |
| LOC114273697 | 0.414335 | 0.254477 | 0.165545 | 6.162446 | 7.062506 | 4.503931 | -4.45655 | 1.330329 | 357.0968 | 1.15E-28 | 2.45E-27 |
| LOC114273666 | 2.429979 | 2.06446  | 2.139791 | 0.175415 | 0.37668  | 0.229081 | 2.946036 | 2.107613 | 335.4628 | 3.28E-31 | 8.52E-30 |
| LOC114273667 | 2.79707  | 2.329923 | 2.707665 | 0.113411 | 0.193474 | 0.100037 | 4.135917 | 2.016893 | 473.5836 | 2.02E-37 | 8.47E-36 |
| LOC114273710 | 1.086343 | 1.37377  | 1.469059 | 0        | 0        | 0        | 8.916315 | 0.380615 | 199.8519 | 2.87E-24 | 4.38E-23 |

|              |          |          |          |          |          |          |          |          |          |          |          |
|--------------|----------|----------|----------|----------|----------|----------|----------|----------|----------|----------|----------|
| LOC114273713 | 3.027067 | 3.171628 | 2.934083 | 0.964213 | 1.413663 | 1.395179 | 1.145406 | 2.832744 | 124.4406 | 2.17E-18 | 2.04E-17 |
| LOC114273731 | 3.838079 | 3.627114 | 3.76523  | 0.664471 | 0.457784 | 0.753579 | 2.473063 | 1.570145 | 199.4487 | 1.86E-24 | 2.87E-23 |
| LOC114273763 | 0.805186 | 0.85169  | 1.286824 | 0.044354 | 0.034923 | 0.033535 | 4.485177 | -0.43046 | 80.33215 | 4.45E-14 | 2.94E-13 |
| LOC114273857 | 6.355887 | 7.014151 | 6.037509 | 21.31251 | 20.18765 | 19.90726 | -1.76528 | 4.029486 | 719.2156 | 1.93E-44 | 1.33E-42 |
| LOC114273872 | 0.858766 | 0.8979   | 1.078357 | 0.390271 | 0.395082 | 0.463685 | 1.060988 | 0.515839 | 22.95543 | 6.58E-06 | 1.95E-05 |
| LOC114273873 | 22.31704 | 21.92099 | 21.04256 | 43.9325  | 40.62044 | 43.23941 | -1.07351 | 6.333459 | 965.2569 | 1.36E-40 | 7.13E-39 |
| LOC114273874 | 1.154835 | 1.092287 | 0.998174 | 0.055981 | 0.066116 | 0.042325 | 4.149844 | 0.300344 | 141.1736 | 4.55E-20 | 4.9E-19  |
| LOC114273887 | 0.467911 | 0.579554 | 0.35988  | 4.08278  | 3.683446 | 4.6303   | -3.22958 | 0.596751 | 174.5646 | 1.05E-22 | 1.42E-21 |
| LOC114273900 | 0.444072 | 0.69051  | 0.755116 | 0.288302 | 0.287532 | 0.24704  | 1.084295 | 0.462529 | 21.41161 | 1.27E-05 | 3.62E-05 |
| LOC114273910 | 2.443721 | 2.829135 | 2.893013 | 0.125134 | 0.246315 | 0.307482 | 3.411452 | 1.422236 | 260.6918 | 3.38E-28 | 6.96E-27 |
| LOC114273911 | 0.99832  | 0.961406 | 1.212358 | 2.053552 | 1.99292  | 2.202566 | -1.08576 | 1.876907 | 66.96364 | 1.82E-12 | 1.04E-11 |
| LOC114273913 | 0.190374 | 0.30623  | 0.209172 | 2.768528 | 3.191917 | 3.550964 | -3.85778 | 0.944713 | 272.6739 | 7.49E-29 | 1.63E-27 |
| LOC114273943 | 7.865939 | 5.144893 | 6.799721 | 12.82693 | 13.24524 | 14.54708 | -1.13747 | 2.416465 | 95.7845  | 1.24E-15 | 9.29E-15 |
| LOC114274018 | 1.30448  | 1.542284 | 1.218294 | 0.177848 | 0.280064 | 0.448219 | 1.987823 | -0.19841 | 37.90805 | 2.09E-08 | 8.2E-08  |
| LOC114274005 | 2.539271 | 2.465308 | 2.485157 | 0.712675 | 0.595668 | 0.646598 | 1.840379 | 2.974266 | 346.4096 | 1.88E-32 | 5.33E-31 |
| LOC114274009 | 3.122733 | 3.019553 | 2.500615 | 1.411125 | 1.136324 | 1.357884 | 1.04853  | 1.866318 | 56.18859 | 4.62E-11 | 2.33E-10 |
| LOC114274020 | 3.493738 | 4.03229  | 3.934683 | 10.32036 | 9.501059 | 9.903697 | -1.47933 | 2.269283 | 154.3737 | 3.74E-21 | 4.41E-20 |
| LOC114274096 | 1.746306 | 1.988185 | 1.833462 | 0.493807 | 0.777614 | 1.013385 | 1.133161 | 1.089363 | 37.44182 | 2.47E-08 | 9.63E-08 |
| LOC114274026 | 7.686659 | 7.060955 | 7.575978 | 2.269722 | 2.162075 | 2.152746 | 1.658129 | 4.683676 | 861.4054 | 1.4E-47  | 1.19E-45 |
| LOC114274083 | 0.684852 | 0.420623 | 0.581458 | 1.131762 | 0.980223 | 1.197968 | -1.05873 | -0.21322 | 14.65749 | 0.000239 | 0.000569 |
| LOC114274114 | 1.237152 | 0.870644 | 0.99521  | 1.967806 | 1.928826 | 2.003974 | -1.02164 | 1.074707 | 34.82877 | 6.4E-08  | 2.39E-07 |
| LOC114274060 | 17.99639 | 18.31997 | 18.24056 | 8.210255 | 7.837245 | 7.93317  | 1.081856 | 4.488359 | 357.5653 | 6.08E-33 | 1.78E-31 |
| LOC114274138 | 1.908725 | 2.858005 | 1.941022 | 0.553679 | 0.959086 | 0.893056 | 1.330873 | 1.2321   | 49.19348 | 2E-09    | 8.68E-09 |
| LOC114274142 | 0.641138 | 0.508018 | 0.756626 | 1.769795 | 1.155566 | 1.338088 | -1.23531 | 0.431529 | 30.7435  | 2.97E-07 | 1.03E-06 |
| LOC114274147 | 9.572241 | 9.121692 | 9.020634 | 3.830119 | 4.029608 | 3.594832 | 1.170668 | 3.434238 | 231.9064 | 1.57E-26 | 2.88E-25 |
| LOC114274183 | 0.313891 | 0.459472 | 0.724258 | 1.369433 | 1.931856 | 1.811926 | -1.90201 | 0.145006 | 53.7248  | 1E-10    | 4.92E-10 |



|              |          |          |          |          |          |          |          |          |          |          |          |
|--------------|----------|----------|----------|----------|----------|----------|----------|----------|----------|----------|----------|
| LOC114274191 | 11.88064 | 12.2455  | 12.16691 | 0.154447 | 0.121607 | 0.194622 | 6.137086 | 3.67932  | 2308.138 | 1.72E-65 | 6.36E-63 |
| LOC114274235 | 6.827631 | 6.3573   | 6.924742 | 12.29207 | 12.21541 | 15.24883 | -1.09428 | 2.221397 | 83.4866  | 1.94E-14 | 1.32E-13 |
| LOC114274205 | 23.09972 | 23.90741 | 23.85607 | 10.07344 | 10.50454 | 10.74667 | 1.070866 | 5.861875 | 825.7871 | 8.96E-46 | 6.69E-44 |
| LOC114274248 | 6.600951 | 6.899371 | 5.9518   | 2.798055 | 2.499665 | 2.766455 | 1.166994 | 2.241909 | 89.12473 | 4.55E-15 | 3.28E-14 |
| LOC114274216 | 1.720482 | 1.862025 | 1.853659 | 7.560725 | 8.009138 | 7.09389  | -2.1655  | 3.108223 | 558.5652 | 3.79E-40 | 1.93E-38 |
| LOC114274218 | 7.707713 | 7.893637 | 7.379942 | 2.757769 | 2.591641 | 2.606332 | 1.428148 | 3.6589   | 386.7403 | 3.6E-34  | 1.16E-32 |
| LOC114274262 | 0.712145 | 0.518859 | 0.567669 | 0.050767 | 0.079944 | 0.057575 | 3.098422 | -0.2722  | 66.30225 | 2.2E-12  | 1.25E-11 |
| LOC114274304 | 0.944623 | 0.797733 | 1.193582 | 3.219669 | 2.061848 | 2.239551 | -1.43173 | 1.179908 | 65.04887 | 4.49E-12 | 2.48E-11 |
| LOC114274353 | 2.492111 | 3.280384 | 2.969583 | 1.052796 | 0.678221 | 0.940712 | 1.613862 | 1.740727 | 107.217  | 7.62E-17 | 6.3E-16  |
| LOC114274314 | 7.736226 | 7.121471 | 7.364323 | 17.4172  | 16.76828 | 16.07121 | -1.28051 | 5.054773 | 775.304  | 9.68E-46 | 7.17E-44 |
| LOC114274398 | 0.363346 | 0.422764 | 0.399223 | 1.475112 | 1.646838 | 1.53144  | -2.08153 | 1.307262 | 151.9085 | 5.9E-21  | 6.84E-20 |
| LOC114274399 | 7.624871 | 8.310848 | 10.79056 | 70.35668 | 69.58392 | 70.21346 | -3.08365 | 5.324708 | 666.5334 | 2.62E-06 | 8.15E-06 |
| LOC114274400 | 266.1227 | 253.8202 | 273.3036 | 1128.782 | 1134.298 | 1160.822 | -2.21545 | 9.170236 | 8773.903 | 1.1E-73  | 6.85E-71 |
| LOC114274464 | 3.962389 | 3.482257 | 3.886422 | 10.54085 | 7.884538 | 9.669806 | -1.40292 | 3.378625 | 297.7578 | 1.36E-27 | 2.67E-26 |
| LOC114274505 | 2.667418 | 1.501753 | 2.518659 | 3.560903 | 5.010932 | 4.296209 | -1.05278 | 1.277597 | 38.61466 | 2.33E-08 | 9.12E-08 |
| LOC114274547 | 11.62927 | 11.78508 | 12.55208 | 3.792753 | 4.405996 | 4.983018 | 1.325817 | 2.856131 | 174.4966 | 1.06E-22 | 1.43E-21 |
| LOC114274575 | 13.43381 | 13.45836 | 13.94644 | 4.223054 | 4.192506 | 4.488603 | 1.55253  | 3.003365 | 269.4902 | 1.11E-28 | 2.38E-27 |
| LOC114274613 | 0.988343 | 1.063411 | 1.182461 | 0.199626 | 0.22005  | 0.181117 | 2.302264 | -0.02443 | 55.54731 | 5.64E-11 | 2.83E-10 |
| LOC114274686 | 1.971822 | 1.366318 | 1.91654  | 0.045954 | 0.361827 | 0.104234 | 3.164294 | 0.337677 | 98.04517 | 2.81E-15 | 2.05E-14 |
| LOC114274754 | 1.962653 | 1.924174 | 1.821827 | 0.092269 | 0.096866 | 0.046508 | 4.476375 | 0.910114 | 238.3481 | 6.47E-27 | 1.21E-25 |
| LOC114274764 | 0.183334 | 0.187667 | 0.219749 | 1.272482 | 1.479009 | 1.28278  | -2.86748 | 0.514065 | 142.2648 | 3.68E-20 | 3.99E-19 |
| LOC114274773 | 0.536501 | 0.469855 | 0.654974 | 4.171961 | 3.92477  | 3.482012 | -2.88763 | 1.181886 | 225.7362 | 3.75E-26 | 6.64E-25 |
| LOC114274808 | 0.426753 | 0.400436 | 0.429817 | 1.271385 | 1.102847 | 1.075303 | -1.54613 | 1.029315 | 74.43056 | 2.2E-13  | 1.37E-12 |
| LOC114274810 | 1.950331 | 1.80038  | 2.084993 | 4.120275 | 4.929121 | 5.31277  | -1.4148  | 2.556123 | 165.4398 | 5.1E-22  | 6.46E-21 |
| LOC114274812 | 4.497536 | 3.60122  | 3.953304 | 0        | 0.143051 | 0.068682 | 5.492946 | 0.439187 | 184.515  | 2E-23    | 2.88E-22 |
| LOC114274847 | 3.354176 | 3.289467 | 4.517555 | 1.573495 | 1.626079 | 1.561445 | 1.115985 | 0.65033  | 27.29315 | 1.14E-06 | 3.69E-06 |

|              |          |          |          |          |          |          |          |          |          |          |          |
|--------------|----------|----------|----------|----------|----------|----------|----------|----------|----------|----------|----------|
| LOC114274825 | 3.401814 | 3.212623 | 3.207201 | 1.236778 | 1.413577 | 1.478046 | 1.133022 | 1.710707 | 61.28384 | 9.7E-12  | 5.21E-11 |
| LOC114274898 | 0.956266 | 1.076753 | 0.659735 | 0.20213  | 0.350131 | 0.366779 | 1.397382 | -0.12594 | 22.0222  | 9.69E-06 | 2.81E-05 |
| LOC114274897 | 1.487199 | 1.634712 | 1.089365 | 0.064368 | 0        | 0.048667 | 4.992839 | -0.45665 | 84.37374 | 1.54E-14 | 1.05E-13 |
| LOC114274947 | 0.465742 | 0.314654 | 0.614076 | 3.471205 | 3.733028 | 4.160749 | -3.1179  | 0.495283 | 155.1252 | 3.26E-21 | 3.87E-20 |
| LOC114274937 | 0.927184 | 0.820292 | 0.836819 | 5.116561 | 4.83433  | 4.824218 | -2.60645 | 1.423134 | 235.9975 | 8.93E-27 | 1.66E-25 |
| LOC114274948 | 113.6917 | 108.211  | 111.3629 | 321.1885 | 313.1363 | 321.2073 | -1.62497 | 7.575219 | 2936.067 | 1.84E-55 | 2.93E-53 |
| LOC114274910 | 1.353721 | 1.405512 | 1.37149  | 0.383505 | 0.553591 | 0.652402 | 1.235056 | 0.792163 | 36.84804 | 3.06E-08 | 1.18E-07 |
| LOC114274953 | 4.605118 | 6.087153 | 4.509853 | 0.727938 | 0.286577 | 0.343982 | 3.422792 | 0.824413 | 162.1848 | 1.25E-21 | 1.53E-20 |
| LOC114274952 | 2.801141 | 2.915133 | 2.424879 | 0.308605 | 0.060746 | 0.408321 | 3.259804 | 0.226481 | 99.73974 | 3.37E-16 | 2.64E-15 |
| LOC114274968 | 1.656957 | 1.431839 | 1.778228 | 0        | 0        | 0.105922 | 5.080736 | -0.38551 | 90.63197 | 3.12E-15 | 2.27E-14 |
| LOC114274976 | 0.348498 | 0.235445 | 0.319091 | 0.992495 | 0.847965 | 0.750396 | -1.59547 | 0.634543 | 58.08918 | 2.56E-11 | 1.33E-10 |
| LOC114275054 | 2.468076 | 2.391274 | 3.27936  | 1.147715 | 1.314432 | 0.946639 | 1.145412 | 0.141549 | 19.52658 | 2.79E-05 | 7.6E-05  |
| LOC114275063 | 2.708628 | 2.668671 | 2.773168 | 8.224988 | 7.136904 | 7.064741 | -1.556   | 2.343466 | 176.2142 | 7.96E-23 | 1.08E-21 |
| LOC114275043 | 1.142737 | 0.951054 | 1.719589 | 0.361268 | 0.462232 | 0.546288 | 1.337096 | 0.196345 | 25.48797 | 2.41E-06 | 7.54E-06 |
| LOC114275077 | 4.11854  | 3.903479 | 3.548547 | 0.269308 | 0.169635 | 0.570124 | 3.364288 | 1.163347 | 207.5958 | 6.11E-25 | 9.84E-24 |
| LOC114275072 | 0.208536 | 0.091316 | 0.229127 | 0.505442 | 0.364804 | 0.557301 | -1.51229 | -0.15842 | 28.40979 | 7.34E-07 | 2.43E-06 |
| LOC114275074 | 0.077298 | 0.11605  | 0.056621 | 2.154558 | 3.097823 | 2.177897 | -4.98163 | 1.612066 | 485.7487 | 3.67E-34 | 1.18E-32 |
| LOC114275107 | 57.08531 | 56.14207 | 56.90314 | 1.753769 | 1.615899 | 1.805579 | 4.931732 | 5.381086 | 7245.979 | 3.92E-87 | 1.04E-83 |
| LOC114275185 | 11.88545 | 12.51019 | 11.5686  | 4.873007 | 4.34534  | 4.794072 | 1.256594 | 2.961326 | 175.2262 | 9.41E-23 | 1.27E-21 |
| LOC114275195 | 0.570514 | 0.778663 | 0.702829 | 0.031427 | 0        | 0.023761 | 4.981254 | -0.46317 | 84.56044 | 1.46E-14 | 1.01E-13 |
| LOC114275199 | 4.243219 | 5.59905  | 4.589355 | 26.57513 | 27.99404 | 27.92924 | -2.62745 | 3.910379 | 1273.861 | 1.39E-52 | 1.78E-50 |
| LOC114275205 | 6.904372 | 6.456628 | 6.021752 | 12.0191  | 12.47833 | 12.51846 | -1.03859 | 3.87982  | 259.503  | 3.93E-28 | 8.05E-27 |
| LOC114275247 | 3.457528 | 3.125902 | 3.188883 | 0.367017 | 0.144488 | 0.277491 | 3.549102 | 1.142256 | 225.6472 | 3.8E-26  | 6.72E-25 |
| LOC114275301 | 0        | 0        | 0        | 2.208762 | 3.24633  | 3.005961 | -7.88393 | -0.84129 | 113.6757 | 1.8E-17  | 1.57E-16 |
| LOC114275306 | 27.0193  | 26.8837  | 27.56904 | 1.078293 | 0.636759 | 0.611449 | 5.062557 | 3.800235 | 2208.25  | 1.15E-64 | 3.88E-62 |
| LOC114275327 | 2.168873 | 2.598028 | 2.18022  | 0.838856 | 0.858633 | 0.887927 | 1.306499 | 0.180884 | 25.99855 | 1.91E-06 | 6.04E-06 |

|              |          |          |          |          |          |          |          |          |          |          |          |
|--------------|----------|----------|----------|----------|----------|----------|----------|----------|----------|----------|----------|
| LOC114275329 | 0.776525 | 0.971517 | 1.137601 | 2.823168 | 2.716838 | 2.786724 | -1.63758 | 1.41481  | 105.561  | 8.6E-17  | 7.08E-16 |
| LOC114275323 | 1.570553 | 1.649462 | 1.757295 | 0.043654 | 0.075618 | 0.066011 | 4.592827 | 2.439394 | 703.7135 | 4.58E-44 | 3.06E-42 |
| LOC114275356 | 0.731257 | 0.919635 | 0.678248 | 1.760884 | 1.63113  | 1.69682  | -1.23203 | 1.998779 | 89.42802 | 4.22E-15 | 3.04E-14 |
| LOC114275389 | 0.73972  | 0.620906 | 0.76104  | 0.110019 | 0.1155   | 0.046212 | 2.880115 | 0.921428 | 147.0754 | 1.46E-20 | 1.63E-19 |
| LOC114275436 | 0.443337 | 0.484069 | 0.546157 | 0.268636 | 0.153829 | 0.203107 | 1.149633 | -0.19428 | 15.27455 | 0.000181 | 0.000438 |
| LOC114275468 | 2.476408 | 2.996911 | 2.873509 | 5.637602 | 5.200753 | 5.439358 | -1.06955 | 2.441248 | 91.81703 | 2.32E-15 | 1.71E-14 |
| LOC114275471 | 6.04876  | 5.858608 | 6.949035 | 1.871586 | 2.526212 | 2.627949 | 1.296268 | 2.827315 | 155.7358 | 4.55E-21 | 5.32E-20 |
| LOC114275495 | 2.327467 | 2.400396 | 2.455446 | 0.767556 | 0.75175  | 0.764332 | 1.545655 | 2.225123 | 148.9854 | 1.02E-20 | 1.16E-19 |
| LOC114275502 | 0.747943 | 0.761203 | 0.632151 | 0.339907 | 0.20587  | 0.415143 | 1.047159 | 0.2332   | 17.59594 | 6.44E-05 | 0.000167 |
| LOC114275572 | 3.42662  | 3.437454 | 3.08043  | 7.588034 | 7.668842 | 7.050047 | -1.26739 | 2.986753 | 194.9684 | 3.74E-24 | 5.65E-23 |
| LOC114275513 | 1.371551 | 1.212611 | 1.049305 | 0.572521 | 0.436242 | 0.61439  | 1.062469 | 1.423659 | 42.66813 | 3.9E-09  | 1.64E-08 |
| LOC114275514 | 1.94516  | 1.948947 | 2.264013 | 3.655815 | 3.916602 | 3.851547 | -1.00108 | 2.445461 | 81.951   | 2.9E-14  | 1.94E-13 |
| LOC114275521 | 0.084835 | 0.286573 | 0.223709 | 0.771077 | 0.849968 | 0.536349 | -1.96754 | -0.22785 | 41.21122 | 8.34E-09 | 3.41E-08 |
| LOC114275534 | 0.107073 | 0.129176 | 0.184872 | 0.625629 | 0.963305 | 0.798877 | -2.62733 | 0.920733 | 155.6043 | 4.44E-21 | 5.2E-20  |
| LOC114275563 | 0.26375  | 0.437224 | 0.330043 | 1.025493 | 1.132511 | 0.936455 | -1.69914 | 1.530259 | 115.3922 | 1.17E-17 | 1.03E-16 |
| LOC114275659 | 0.03812  | 0        | 0.104709 | 7.171981 | 5.865217 | 6.20839  | -7.07965 | 2.382781 | 972.2642 | 6.91E-46 | 5.23E-44 |
| LOC114275670 | 7.473516 | 7.510099 | 7.497423 | 0.031088 | 0.024478 | 0        | 8.453015 | 2.722872 | 1143.293 | 1.31E-52 | 1.7E-50  |
| LOC114275699 | 5.350806 | 5.813593 | 4.228865 | 1.877104 | 1.477968 | 1.935302 | 1.433186 | 0.268328 | 32.03062 | 1.82E-07 | 6.47E-07 |
| LOC114275745 | 1.398821 | 1.265944 | 1.393304 | 0.047529 | 0.037423 | 0.089838 | 4.357554 | 0.801369 | 214.6987 | 1.85E-25 | 3.13E-24 |
| LOC114275769 | 30.57399 | 29.55807 | 27.82082 | 3.558893 | 3.759556 | 4.05858  | 2.838946 | 4.90398  | 2425.059 | 2.06E-66 | 7.8E-64  |
| LOC114276084 | 3.547583 | 3.286313 | 3.354202 | 1.387346 | 1.392446 | 1.394732 | 1.181779 | 3.105863 | 181.0388 | 3.55E-23 | 4.99E-22 |
| LOC114276085 | 1.166458 | 1.050743 | 1.06803  | 5.654431 | 4.730366 | 5.290491 | -2.34352 | 1.318504 | 184.9343 | 1.87E-23 | 2.7E-22  |
| LOC114276098 | 0.31141  | 0.381586 | 0.342159 | 0.049949 | 0.026219 | 0.07553  | 2.616265 | -0.40099 | 48.04762 | 6.32E-10 | 2.88E-09 |
| LOC114276099 | 5.400595 | 5.689396 | 6.617761 | 2.229696 | 2.070021 | 1.937418 | 1.40429  | 2.721639 | 169.8171 | 2.38E-22 | 3.09E-21 |
| LOC114276100 | 1.964849 | 2.290732 | 1.986917 | 0.948251 | 0.671959 | 1.075416 | 1.103145 | 1.414058 | 45.30449 | 1.58E-09 | 6.93E-09 |
| LOC114276124 | 3.228588 | 2.818126 | 3.107399 | 0.727938 | 0.322399 | 0.481575 | 2.512885 | 1.164643 | 147.9389 | 1.24E-20 | 1.4E-19  |

|              |          |          |          |          |          |          |          |          |          |          |          |
|--------------|----------|----------|----------|----------|----------|----------|----------|----------|----------|----------|----------|
| LOC114276125 | 38.69022 | 37.76197 | 38.2026  | 1.972341 | 2.117666 | 2.406299 | 4.023431 | 4.591228 | 3017.52  | 1.65E-70 | 7.85E-68 |
| LOC114276159 | 0.381011 | 0.466872 | 0.320131 | 0.162967 | 0.112275 | 0.200223 | 1.177437 | -0.26935 | 14.81117 | 0.000223 | 0.000533 |
| LOC114276200 | 1.483255 | 2.197554 | 1.629714 | 6.102135 | 5.475027 | 5.257403 | -1.76313 | 0.551653 | 65.94669 | 2.44E-12 | 1.38E-11 |
| LOC114276173 | 2.327639 | 1.877143 | 1.831704 | 0.057179 | 0.02251  | 0        | 6.161823 | 1.048397 | 299.397  | 3.1E-30  | 7.47E-29 |
| LOC114276227 | 3.900775 | 3.98964  | 3.607337 | 0        | 0        | 0        | 9.511453 | 0.922029 | 314.2364 | 1.22E-30 | 3.05E-29 |
| LOC114276230 | 0.515646 | 0.405636 | 0.523875 | 0.038521 | 0.045496 | 0.033979 | 3.494576 | 1.218684 | 234.4041 | 1.11E-26 | 2.05E-25 |
| LOC114276290 | 2.286606 | 2.126937 | 1.52928  | 3.99399  | 3.813523 | 4.440787 | -1.14621 | 3.221889 | 129.0074 | 7.41E-12 | 4.02E-11 |
| LOC114276318 | 0.224319 | 0.189437 | 0.20539  | 1.257295 | 0.909686 | 0.976295 | -2.40751 | 0.056743 | 77.63127 | 9.18E-14 | 5.88E-13 |
| LOC114276384 | 0.228457 | 0.154345 | 0.175711 | 0.789059 | 0.948267 | 0.565184 | -2.1083  | -0.57383 | 38.35119 | 1.78E-08 | 7.05E-08 |
| LOC114276512 | 3.174235 | 3.476258 | 3.009902 | 9.959509 | 8.277438 | 9.322961 | -1.6107  | 2.129403 | 162.6122 | 8.41E-22 | 1.05E-20 |
| LOC114276514 | 1.740563 | 2.041531 | 2.091719 | 7.283865 | 8.07062  | 8.447558 | -2.1344  | 3.068807 | 519.5997 | 6.05E-39 | 2.83E-37 |
| LOC114276594 | 78.73084 | 78.09026 | 80.22298 | 9.111754 | 9.220082 | 8.423027 | 3.042843 | 6.043183 | 5760.361 | 9.39E-83 | 1.49E-79 |
| LOC114276601 | 0.470346 | 0.776759 | 0.861314 | 2.793015 | 1.840085 | 2.456484 | -1.84649 | 0.593552 | 69.81384 | 8.33E-13 | 4.91E-12 |
| LOC114276616 | 2.43926  | 2.41368  | 2.585365 | 1.030154 | 0.828741 | 0.948187 | 1.307579 | 2.084323 | 99.91184 | 3.23E-16 | 2.54E-15 |
| LOC114276625 | 4.757919 | 4.620993 | 4.688784 | 0.832211 | 0.725461 | 0.584266 | 2.626058 | 2.328564 | 358.6983 | 5.43E-33 | 1.6E-31  |
| LOC114276608 | 0.78499  | 0.855384 | 1.363309 | 0.368251 | 0.253705 | 0.24362  | 1.701047 | -0.21197 | 28.18611 | 8.01E-07 | 2.65E-06 |
| LOC114276665 | 1.613899 | 1.667884 | 1.554638 | 0.200944 | 0.063287 | 0.182313 | 3.334865 | 0.393863 | 120.4333 | 3.15E-18 | 2.93E-17 |
| LOC114276667 | 2.077598 | 1.665632 | 1.844457 | 0.845981 | 0.808833 | 0.890901 | 1.029584 | 1.346616 | 39.61545 | 1.13E-08 | 4.57E-08 |
| LOC114276693 | 1.966188 | 1.990043 | 1.723412 | 0.401593 | 0.474301 | 0.425085 | 2.005889 | 0.758009 | 82.26883 | 2.66E-14 | 1.79E-13 |
| LOC114276694 | 0.9989   | 0.84357  | 0.983207 | 6.09057  | 5.629512 | 5.520154 | -2.70244 | 2.303636 | 433.5778 | 5.44E-36 | 2.04E-34 |
| LOC114276700 | 2.563222 | 2.323025 | 2.747628 | 6.250522 | 5.950482 | 6.186542 | -1.3699  | 2.090072 | 120.334  | 3.21E-18 | 2.99E-17 |
| LOC114276705 | 0.183881 | 0.168228 | 0.18941  | 0.376046 | 0.394781 | 0.394884 | -1.20565 | -0.31968 | 17.69695 | 6.16E-05 | 0.00016  |
| LOC114276729 | 1.14431  | 1.321528 | 1.096108 | 0        | 0        | 0        | 7.969595 | -0.46048 | 102.9256 | 2.02E-16 | 1.61E-15 |
| LOC114276730 | 2.828494 | 2.557934 | 2.93649  | 1.295546 | 0.828806 | 0.795862 | 1.440102 | 1.388121 | 71.81677 | 4.55E-13 | 2.75E-12 |
| LOC114276769 | 18.32136 | 17.00757 | 17.50714 | 7.035617 | 6.618753 | 7.322834 | 1.227458 | 3.874213 | 340.4938 | 3.46E-32 | 9.68E-31 |
| LOC114276798 | 2.655867 | 2.808569 | 2.951398 | 5.011462 | 4.957615 | 5.621066 | -1.00014 | 3.596841 | 200.8432 | 1.5E-24  | 2.33E-23 |

|              |          |          |          |          |          |          |          |          |          |          |          |
|--------------|----------|----------|----------|----------|----------|----------|----------|----------|----------|----------|----------|
| LOC114276826 | 20.24583 | 19.51343 | 19.07021 | 4.987421 | 4.828034 | 4.991351 | 1.885287 | 5.775947 | 2287.729 | 2.52E-65 | 9.1E-63  |
| LOC114276815 | 1.906462 | 2.114633 | 2.063446 | 0.517255 | 0.407269 | 0.703945 | 1.774705 | 0.549029 | 57.19395 | 3.38E-11 | 1.72E-10 |
| LOC114276837 | 2.180713 | 3.08795  | 2.504951 | 0.360377 | 0.898538 | 0.363294 | 2.109526 | 0.618111 | 71.03437 | 1.36E-12 | 7.86E-12 |
| LOC114276868 | 23.88332 | 21.78141 | 23.4026  | 11.23474 | 10.29518 | 10.6538  | 1.000751 | 3.858273 | 231.1479 | 1.75E-26 | 3.19E-25 |
| LOC114276903 | 2.38344  | 1.993641 | 2.207261 | 0.495162 | 0.438608 | 0.514768 | 2.072262 | 0.368269 | 64.76331 | 3.45E-12 | 1.93E-11 |
| LOC114276908 | 0.706737 | 0.795784 | 0.718282 | 0.289062 | 0.29082  | 0.230693 | 1.351695 | 0.861194 | 45.71104 | 1.38E-09 | 6.08E-09 |
| LOC114276911 | 0.229572 | 0.229776 | 0.233556 | 0.710992 | 0.486792 | 0.502501 | -1.36944 | 0.540796 | 40.89718 | 7.22E-09 | 2.97E-08 |
| LOC114276957 | 1.660516 | 2.364668 | 1.931801 | 0.53268  | 0.699024 | 0.402744 | 1.741056 | -0.18429 | 30.88445 | 2.82E-07 | 9.77E-07 |
| LOC114277030 | 10.1834  | 8.768489 | 10.47352 | 0.33141  | 0.372773 | 0.286364 | 4.774654 | 2.554523 | 782.9251 | 6.54E-46 | 4.96E-44 |
| LOC114277034 | 10.90056 | 10.45326 | 10.61827 | 4.66852  | 3.94812  | 4.209526 | 1.220892 | 3.558736 | 271.685  | 8.47E-29 | 1.83E-27 |
| LOC114277037 | 7.365964 | 4.775367 | 6.008656 | 0.608637 | 1.11818  | 1.073734 | 2.539996 | 0.078769 | 66.69607 | 1.96E-12 | 1.12E-11 |
| LOC114277121 | 1.659676 | 1.576793 | 2.051499 | 4.949756 | 5.196362 | 5.025456 | -1.62715 | 2.014054 | 154.3894 | 3.73E-21 | 4.4E-20  |
| LOC114277140 | 49.05538 | 41.81514 | 49.19274 | 188.8429 | 192.0849 | 192.9991 | -2.14051 | 6.621074 | 3032.945 | 1.58E-41 | 8.97E-40 |
| LOC114277166 | 6.160294 | 5.181465 | 6.11618  | 11.15334 | 11.2959  | 11.83299 | -1.07839 | 3.413227 | 207.457  | 5.45E-25 | 8.81E-24 |
| LOC114277169 | 0.487546 | 0.15938  | 0.483846 | 1.772543 | 2.02593  | 1.642784 | -2.34748 | 1.10049  | 133.1141 | 6.26E-17 | 5.2E-16  |
| LOC114277161 | 0.763149 | 0.810201 | 0.838504 | 0.237818 | 0.280874 | 0.209774 | 1.606767 | -0.28347 | 25.94062 | 1.95E-06 | 6.17E-06 |
| LOC114277187 | 15.74345 | 16.24797 | 14.12706 | 32.52628 | 30.08261 | 30.06314 | -1.10967 | 5.149331 | 579.9054 | 1.03E-35 | 3.77E-34 |
| LOC114277220 | 0.492454 | 0.475287 | 0.515314 | 0.852565 | 1.107614 | 1.063588 | -1.14349 | 0.033647 | 20.74726 | 1.66E-05 | 4.65E-05 |
| LOC114277245 | 3.593023 | 3.910878 | 3.763574 | 8.708633 | 7.74828  | 8.329182 | -1.23992 | 2.940624 | 181.3534 | 3.37E-23 | 4.75E-22 |
| LOC114277247 | 1.049065 | 1.018315 | 0.973792 | 2.433085 | 2.071059 | 2.709655 | -1.34872 | 1.54039  | 81.18282 | 3.55E-14 | 2.36E-13 |
| LOC114277221 | 0.611002 | 0.406537 | 0.457727 | 1.413608 | 0.954023 | 1.183299 | -1.3337  | -0.06579 | 25.07138 | 2.77E-06 | 8.59E-06 |
| LOC114277264 | 1.927856 | 1.645354 | 1.686477 | 0.602684 | 0.913916 | 0.658192 | 1.154914 | 1.644095 | 57.66374 | 2.92E-11 | 1.5E-10  |
| LOC114277202 | 1.396272 | 1.645324 | 1.890919 | 0        | 0.046476 | 0.089257 | 4.817147 | -0.14929 | 106.3957 | 7.1E-17  | 5.88E-16 |
| LOC114277270 | 3.588452 | 3.425135 | 3.577226 | 1.382392 | 1.326548 | 1.208495 | 1.33444  | 1.653562 | 79.42433 | 5.67E-14 | 3.71E-13 |
| LOC114277271 | 6.207757 | 5.650186 | 6.11023  | 0.846345 | 1.258724 | 0.782095 | 2.519571 | 2.041565 | 272.5346 | 7.62E-29 | 1.65E-27 |
| LOC114277210 | 2.734063 | 1.886852 | 2.228796 | 0.42753  | 0.378701 | 0.404053 | 2.396688 | 0.571468 | 90.63902 | 3.11E-15 | 2.27E-14 |

|              |          |          |          |          |          |          |          |          |          |          |          |
|--------------|----------|----------|----------|----------|----------|----------|----------|----------|----------|----------|----------|
| LOC114277275 | 4.181202 | 3.62572  | 4.277229 | 0.829959 | 0.928632 | 1.155934 | 1.925687 | 1.686369 | 147.647  | 1.31E-20 | 1.47E-19 |
| LOC114277287 | 0.760398 | 0.978522 | 0.668385 | 0.35544  | 0.21767  | 0.418036 | 1.165233 | -0.18744 | 15.34843 | 0.000175 | 0.000425 |
| LOC114277241 | 0.717464 | 0.704291 | 1.07129  | 1.738962 | 1.869485 | 1.542334 | -1.15138 | 1.099506 | 42.79787 | 3.73E-09 | 1.58E-08 |
| LOC114277295 | 3.236293 | 3.806017 | 4.622606 | 7.190338 | 7.411327 | 8.747657 | -1.11885 | 2.315313 | 87.60978 | 8.26E-15 | 5.8E-14  |
| LOC114277352 | 2.554634 | 2.740035 | 2.77615  | 7.457306 | 6.832445 | 7.586    | -1.54412 | 4.036056 | 579.7951 | 8.99E-41 | 4.76E-39 |
| LOC114277355 | 73.35839 | 69.02347 | 66.61504 | 8.965265 | 9.27642  | 9.475516 | 2.806638 | 5.491381 | 3655.555 | 4.02E-74 | 2.66E-71 |
| LOC114277379 | 1.92142  | 2.13713  | 2.033907 | 0.681522 | 0.637221 | 0.708507 | 1.474603 | 0.876295 | 54.42685 | 8.03E-11 | 3.97E-10 |
| LOC114277384 | 3.324143 | 3.560393 | 2.642775 | 0.540404 | 0.386814 | 0.334295 | 2.834297 | 1.076705 | 161.1737 | 1.09E-21 | 1.34E-20 |
| LOC114277405 | 4.101244 | 3.995762 | 4.198966 | 0.145234 | 0.123881 | 0.228764 | 4.491702 | 3.254813 | 1327.639 | 2.62E-55 | 4.12E-53 |
| LOC114277393 | 0.805281 | 0.844449 | 0.979354 | 0.033523 | 0.026395 | 0.008449 | 5.163944 | 1.208071 | 317.5445 | 4.03E-31 | 1.04E-29 |
| LOC114277423 | 3.742816 | 3.311316 | 3.566867 | 7.984017 | 7.980928 | 9.238429 | -1.35337 | 2.262451 | 130.2273 | 4.05E-19 | 4.05E-18 |
| LOC114277466 | 3.144861 | 2.330692 | 2.814572 | 5.467336 | 5.335984 | 5.95691  | -1.11741 | 3.480072 | 213.7138 | 2.95E-24 | 4.5E-23  |
| LOC114277524 | 0.131396 | 0.167679 | 0.115496 | 0.429938 | 0.376132 | 0.228748 | -1.38996 | -0.19342 | 23.71271 | 4.81E-06 | 1.45E-05 |
| LOC114277559 | 8.833193 | 8.93895  | 9.213985 | 2.825249 | 2.512571 | 2.612478 | 1.662575 | 3.958439 | 600.3488 | 2.33E-41 | 1.3E-39  |
| LOC114277551 | 4.132711 | 3.437454 | 4.609236 | 1.698814 | 1.813176 | 1.512763 | 1.174019 | 2.079399 | 77.93572 | 8.45E-14 | 5.44E-13 |
| LOC114277589 | 9.066713 | 8.407493 | 8.43838  | 2.132921 | 2.366414 | 1.759241 | 1.946656 | 1.638848 | 146.7433 | 1.56E-20 | 1.74E-19 |
| LOC114277604 | 2.052376 | 2.22458  | 2.012668 | 7.269935 | 8.469475 | 7.829657 | -2.01638 | 3.99699  | 871.4519 | 2.84E-47 | 2.35E-45 |
| LOC114277618 | 3.118508 | 2.939804 | 3.227223 | 0        | 0.103802 | 0.099676 | 5.242616 | 1.448648 | 375.9161 | 1.01E-33 | 3.12E-32 |
| LOC114277631 | 2.586948 | 2.008895 | 2.744375 | 8.724153 | 9.346068 | 9.440469 | -2.01105 | 3.322968 | 574.8128 | 1.71E-40 | 8.94E-39 |
| LOC114277656 | 0.170852 | 0.201327 | 0.174625 | 0.382806 | 0.489077 | 0.507864 | -1.45761 | 1.321746 | 80.0878  | 4.75E-14 | 3.13E-13 |
| LOC114277663 | 0.314894 | 0.275313 | 0.297142 | 0        | 0.005302 | 0        | 6.82649  | 0.415292 | 199.9842 | 1.71E-24 | 2.65E-23 |
| LOC114277664 | 0.05208  | 0        | 0.034333 | 0.738443 | 0.491975 | 0.57263  | -4.34306 | -0.11068 | 133.1244 | 3.76E-19 | 3.76E-18 |
| LOC114277667 | 10.28271 | 10.08072 | 10.09844 | 3.861114 | 4.4039   | 4.392549 | 1.152563 | 3.444824 | 228.352  | 2.59E-26 | 4.65E-25 |
| LOC114277666 | 6.243539 | 5.093746 | 7.147583 | 1.970895 | 1.498306 | 1.69567  | 1.746478 | 1.702325 | 121.7605 | 2.37E-18 | 2.23E-17 |
| LOC114277696 | 1.369704 | 1.465169 | 1.373268 | 0.280111 | 0.343078 | 0.117658 | 2.411384 | 0.639702 | 93.84541 | 1.4E-15  | 1.05E-14 |
| LOC114277682 | 2.2857   | 1.723666 | 1.981466 | 0.114358 | 0.060028 | 0.115283 | 4.241806 | 0.697805 | 191.1998 | 6.8E-24  | 1.01E-22 |

|              |          |          |          |          |          |          |          |          |          |          |          |
|--------------|----------|----------|----------|----------|----------|----------|----------|----------|----------|----------|----------|
| LOC114277737 | 14.19029 | 13.59089 | 14.82106 | 4.885953 | 6.069236 | 5.988607 | 1.213019 | 4.152554 | 344.9755 | 5.16E-32 | 1.41E-30 |
| LOC114277744 | 0.419287 | 0.434844 | 0.545552 | 0.240691 | 0.157927 | 0.197144 | 1.13877  | -0.00233 | 17.41479 | 6.97E-05 | 0.00018  |
| LOC114277770 | 5.322199 | 5.386577 | 4.968873 | 0.139809 | 0.110081 | 0.253693 | 4.808522 | 2.409665 | 700.5024 | 5.49E-44 | 3.66E-42 |
| LOC114277783 | 2.251353 | 2.262016 | 3.310892 | 0        | 0        | 0.047604 | 6.73552  | 0.33612  | 176.991  | 8.79E-23 | 1.19E-21 |
| LOC114277778 | 3.558829 | 3.499767 | 3.688255 | 1.610266 | 1.223383 | 1.516502 | 1.207328 | 2.302686 | 98.6986  | 4.32E-16 | 3.37E-15 |
| LOC114277806 | 0.609065 | 0.668661 | 0.702665 | 0.110717 | 0.043587 | 0.041855 | 3.263819 | -0.27408 | 69.71899 | 8.23E-13 | 4.86E-12 |
| LOC114277796 | 5.726302 | 5.954528 | 5.260296 | 1.76334  | 1.970625 | 2.365369 | 1.350788 | 1.916182 | 93.61743 | 1.48E-15 | 1.11E-14 |
| LOC114277849 | 4.514206 | 4.244555 | 5.138914 | 1.057477 | 1.16567  | 1.183299 | 1.911541 | 1.928592 | 171.3599 | 1.82E-22 | 2.4E-21  |
| LOC114277851 | 0.010871 | 0        | 0.023888 | 0.928764 | 0.840191 | 0.567744 | -5.94631 | 0.144391 | 201.0891 | 2.23E-24 | 3.43E-23 |
| LOC114277900 | 0.068369 | 0.076983 | 0.07512  | 1.86423  | 2.39746  | 1.832335 | -4.8527  | 0.916623 | 325.5647 | 1.68E-31 | 4.45E-30 |
| LOC114277918 | 27.30024 | 25.67026 | 27.10009 | 5.070494 | 4.306694 | 4.558115 | 2.424313 | 4.401792 | 1361.686 | 9.07E-56 | 1.51E-53 |
| LOC114277921 | 2.753095 | 2.845684 | 2.375051 | 1.094764 | 0.969728 | 0.960744 | 1.300698 | 2.375937 | 115.8396 | 8.52E-18 | 7.64E-17 |
| LOC114277988 | 0.843205 | 1.274258 | 1.084939 | 1.915995 | 2.143786 | 1.967082 | -1.02917 | 2.090074 | 64.19242 | 4.96E-12 | 2.73E-11 |
| LOC114278060 | 0.503658 | 0.788432 | 0.769347 | 0.31263  | 0.386814 | 0.23637  | 1.022536 | 0.395149 | 18.23261 | 4.94E-05 | 0.00013  |
| LOC114278063 | 3.947063 | 4.508102 | 4.55442  | 0        | 0        | 0.058332 | 7.414867 | 2.227981 | 713.1248 | 2.16E-42 | 1.29E-40 |
| LOC114278069 | 3.215827 | 3.263383 | 3.489741 | 0.324767 | 0.25571  | 0.272829 | 3.441738 | 1.501513 | 292.1477 | 7.19E-30 | 1.68E-28 |
| LOC114278078 | 1.704432 | 1.205643 | 1.5366   | 0.079445 | 0        | 0.030033 | 5.249442 | 0.224465 | 148.2525 | 1.17E-20 | 1.32E-19 |
| LOC114278088 | 2.220722 | 1.961953 | 1.745538 | 4.378458 | 3.251851 | 4.085198 | -1.07403 | 2.397403 | 85.14119 | 1.46E-14 | 1.01E-13 |
| LOC114278122 | 4.82568  | 4.673391 | 4.85703  | 0        | 0.038658 | 0.024748 | 7.526911 | 2.996443 | 1362.258 | 8.91E-56 | 1.49E-53 |
| LOC114278126 | 0.934889 | 0.977492 | 1.045545 | 0.030348 | 0        | 0.04589  | 5.042043 | 0.045577 | 129.5377 | 4.66E-19 | 4.64E-18 |
| LOC114278138 | 0.615936 | 0.769756 | 0.669318 | 0.270687 | 0.21313  | 0.204659 | 1.48391  | 1.088124 | 61.94805 | 7.95E-12 | 4.3E-11  |
| LOC114278137 | 2.504498 | 1.700988 | 2.271324 | 0.072266 | 0.113799 | 0.054638 | 4.548676 | -0.04591 | 112.5894 | 1.75E-17 | 1.52E-16 |
| LOC114278164 | 7.701119 | 7.709857 | 7.757809 | 1.885049 | 2.160856 | 1.970169 | 1.832763 | 3.259256 | 444.0968 | 2.23E-36 | 8.66E-35 |
| LOC114278150 | 0.77641  | 0.709286 | 0.579446 | 1.224966 | 1.467713 | 1.38924  | -1.09085 | 1.118093 | 40.56485 | 8.11E-09 | 3.32E-08 |
| LOC114278172 | 11.72917 | 11.55346 | 12.21677 | 0.312023 | 0.300271 | 0.366972 | 5.054686 | 3.247549 | 1497.968 | 1.66E-57 | 3.27E-55 |
| LOC114278188 | 0.707174 | 0.353901 | 0.690668 | 1.142682 | 1.574491 | 1.727894 | -1.45178 | -0.2361  | 25.55974 | 2.27E-06 | 7.13E-06 |

|              |          |          |          |          |          |          |          |          |          |          |          |
|--------------|----------|----------|----------|----------|----------|----------|----------|----------|----------|----------|----------|
| LOC114278202 | 2.161969 | 1.962595 | 1.675702 | 0        | 0        | 0        | 9.483534 | 0.894034 | 300.6181 | 5.53E-30 | 1.31E-28 |
| LOC114278205 | 0.546599 | 0.595616 | 0.678065 | 0        | 0        | 0        | 7.735362 | -0.66141 | 86.83376 | 9.91E-15 | 6.9E-14  |
| LOC114278212 | 18.13117 | 15.76103 | 15.6601  | 44.36149 | 43.19834 | 45.53946 | -1.52973 | 5.869339 | 1475.935 | 1.47E-46 | 1.16E-44 |
| LOC114278296 | 0.865905 | 0.996674 | 1.057118 | 0.069958 | 0.165248 | 0.23802  | 2.426665 | -0.00567 | 58.8562  | 2.03E-11 | 1.06E-10 |
| LOC114278297 | 1.18137  | 1.233827 | 1.203961 | 0.560222 | 0.563628 | 0.447099 | 1.103347 | 0.690035 | 28.25009 | 7.81E-07 | 2.58E-06 |
| LOC114278305 | 0.3433   | 0.299914 | 0.331675 | 1.086723 | 1.253823 | 1.033149 | -1.89278 | 1.912557 | 187.976  | 1.14E-23 | 1.67E-22 |
| LOC114278315 | 0.858038 | 0.667103 | 0.650955 | 0        | 0.009747 | 0.028078 | 5.51803  | 0.810647 | 237.0418 | 1.03E-26 | 1.91E-25 |
| LOC114278326 | 0.235813 | 0.113796 | 0.111042 | 16.93228 | 17.28567 | 17.59405 | -6.86879 | 4.00662  | 3535.939 | 1.71E-73 | 1.02E-70 |
| LOC114278318 | 0.044842 | 0.151474 | 0.123173 | 29.34498 | 30.1331  | 31.09241 | -8.23651 | 4.394122 | 4752.976 | 4.27E-79 | 4.38E-76 |
| LOC114278346 | 1.404669 | 1.412191 | 1.488248 | 0.455971 | 0.694098 | 0.574576 | 1.188979 | 0.930411 | 38.18879 | 1.89E-08 | 7.45E-08 |
| LOC114278370 | 1.167965 | 0.789075 | 0.834139 | 2.866254 | 1.838868 | 2.327613 | -1.39511 | -0.16779 | 25.15419 | 2.68E-06 | 8.32E-06 |
| LOC114278388 | 1.96895  | 2.12064  | 1.787129 | 0.41498  | 0.571797 | 0.509849 | 1.840358 | 0.487806 | 58.41158 | 2.32E-11 | 1.2E-10  |
| LOC114278398 | 17.56852 | 16.72511 | 17.0845  | 46.4567  | 46.2128  | 46.072   | -1.53807 | 5.436039 | 1416.981 | 1.71E-56 | 3.08E-54 |
| LOC114278369 | 0.960903 | 0.729421 | 0.972745 | 0.176638 | 0.169985 | 0.163228 | 2.277295 | 0.661895 | 91.24602 | 2.67E-15 | 1.96E-14 |
| LOC114278448 | 1.223131 | 1.397011 | 1.151    | 0.223407 | 0.201032 | 0.201085 | 2.488022 | 1.9432   | 253.6858 | 8.35E-28 | 1.67E-26 |
| LOC114278549 | 22.8463  | 22.44275 | 24.58283 | 6.80241  | 7.554764 | 7.904127 | 1.534447 | 3.546481 | 402.5336 | 8.37E-35 | 2.86E-33 |
| LOC114278580 | 4.33292  | 3.936351 | 4.70666  | 0.984559 | 0.845683 | 0.541379 | 2.368049 | 0.739342 | 101.8294 | 2.05E-16 | 1.64E-15 |
| LOC114278611 | 2.613099 | 2.468698 | 2.675044 | 0.1622   | 0.091222 | 0.157673 | 4.130131 | 1.723493 | 403.2883 | 7.82E-35 | 2.68E-33 |
| LOC114278610 | 3.360696 | 2.336514 | 2.750816 | 0.328008 | 0.387393 | 0.340996 | 2.882361 | 1.151768 | 174.8247 | 1.01E-22 | 1.36E-21 |
| LOC114278680 | 2.603836 | 2.452146 | 2.522832 | 0        | 0.03388  | 0        | 7.24288  | 0.795175 | 273.4221 | 6.83E-29 | 1.49E-27 |
| LOC114278678 | 1.139693 | 1.462953 | 1.051872 | 0.041435 | 0.065249 | 0.031328 | 4.513899 | -0.06881 | 109.3422 | 3.62E-17 | 3.07E-16 |
| LOC114278662 | 1.333695 | 1.219456 | 1.388261 | 0.054686 | 0.071763 | 0.096475 | 3.978733 | 1.134001 | 255.8951 | 6.26E-28 | 1.26E-26 |
| LOC114278765 | 0.414335 | 0.275683 | 0.331089 | 2.567686 | 2.345183 | 2.070773 | -2.84687 | 1.117966 | 209.8706 | 3.79E-25 | 6.24E-24 |
| LOC114278795 | 1.727653 | 1.568331 | 1.545083 | 0.194764 | 0.249194 | 0.128848 | 2.97122  | 1.095061 | 178.7766 | 5.18E-23 | 7.16E-22 |
| LOC114278832 | 1.680821 | 1.268238 | 1.751593 | 0.314993 | 0.124007 | 0.309604 | 2.558995 | 0.753059 | 109.2221 | 4.23E-17 | 3.57E-16 |
| LOC114278862 | 0.580021 | 0.544252 | 0.561425 | 0.150625 | 0.177896 | 0.075922 | 1.959771 | -0.21407 | 36.93228 | 2.97E-08 | 1.15E-07 |



|              |          |          |          |          |          |          |          |          |          |          |          |
|--------------|----------|----------|----------|----------|----------|----------|----------|----------|----------|----------|----------|
| LOC114278849 | 6.830608 | 6.892542 | 7.938059 | 3.151963 | 2.707364 | 3.033041 | 1.181911 | 2.556608 | 111.554  | 2.2E-17  | 1.9E-16  |
| LOC114278869 | 0.941274 | 0.945292 | 0.964338 | 0.346838 | 0.49156  | 0.437056 | 1.03191  | 0.784836 | 26.76752 | 1.4E-06  | 4.51E-06 |
| LOC114278846 | 1441.862 | 1412.811 | 1462.633 | 2814.767 | 2693.199 | 2798.264 | -1.04937 | 10.77343 | 4203.728 | 1.04E-16 | 8.49E-16 |
| LOC114278887 | 23.69553 | 22.18016 | 22.2345  | 7.126639 | 6.629007 | 6.761708 | 1.628698 | 4.515913 | 757.6116 | 2.43E-45 | 1.77E-43 |
| LOC114278888 | 1.18558  | 1.223714 | 1.157908 | 0.718391 | 0.329955 | 0.407365 | 1.232713 | -0.22601 | 16.67938 | 9.65E-05 | 0.000243 |
| LOC114278956 | 14.51648 | 14.00483 | 13.30115 | 3.080231 | 2.650295 | 3.265219 | 2.112431 | 3.852873 | 828.059  | 6.89E-47 | 5.56E-45 |
| LOC114278988 | 0        | 0        | 0.009877 | 0.473909 | 0.37314  | 0.593061 | -6.79936 | -0.26669 | 163.741  | 6.89E-22 | 8.64E-21 |
| LOC114279020 | 0.768074 | 0.864849 | 0.902792 | 2.110566 | 1.891882 | 2.209479 | -1.39847 | 1.33104  | 76.27145 | 1.33E-13 | 8.41E-13 |
| LOC114278977 | 4.545275 | 5.117969 | 5.179049 | 2.040123 | 1.766957 | 2.005218 | 1.244742 | 0.955469 | 42.56352 | 4.04E-09 | 1.7E-08  |
| LOC114279026 | 0.240287 | 0.236742 | 0.276389 | 0.047775 | 0.016121 | 0.046441 | 2.672352 | 0.338018 | 87.13066 | 7.55E-15 | 5.32E-14 |
| LOC114278980 | 0.222296 | 0.222493 | 0.434215 | 1.526581 | 0.91916  | 1.425778 | -2.22141 | -0.00266 | 61.80754 | 8.29E-12 | 4.48E-11 |
| LOC114279058 | 1.436864 | 1.648433 | 1.593637 | 0.394259 | 0.407434 | 0.372609 | 1.881845 | 1.178793 | 100.7941 | 2.62E-16 | 2.08E-15 |
| LOC114279110 | 1.666867 | 1.560011 | 1.641175 | 0.019676 | 0.015492 | 0        | 6.907603 | 1.253083 | 381.439  | 5.94E-34 | 1.88E-32 |
| LOC114279130 | 2.492431 | 2.946795 | 2.300372 | 7.294579 | 8.097987 | 7.433544 | -1.66983 | 2.649947 | 241.1101 | 4.44E-27 | 8.39E-26 |
| LOC114279112 | 1.843876 | 1.79179  | 2.275718 | 0.826481 | 0.723048 | 0.9026   | 1.157483 | 0.810672 | 33.19077 | 1.18E-07 | 4.27E-07 |
| LOC114279155 | 5.209592 | 5.379185 | 5.106469 | 3.182899 | 2.165772 | 1.960847 | 1.026828 | 2.431162 | 72.28152 | 7.26E-13 | 4.3E-12  |
| LOC114279163 | 2.849713 | 2.582057 | 2.739711 | 0.768946 | 0.796635 | 0.795568 | 1.682267 | 2.265523 | 176.3648 | 7.76E-23 | 1.06E-21 |
| LOC114279187 | 5.543503 | 5.75752  | 5.745425 | 11.03969 | 10.72916 | 10.39367 | -1.01984 | 3.919626 | 258.9801 | 4.21E-28 | 8.6E-27  |
| LOC114279211 | 1.005504 | 1.018263 | 1.181221 | 0.126453 | 0.135771 | 0.095608 | 3.055748 | 1.545813 | 257.1946 | 5.29E-28 | 1.08E-26 |
| LOC114279214 | 0.614303 | 0.654977 | 0.639122 | 0.227292 | 0.24899  | 0.31381  | 1.145908 | 1.367889 | 48.90061 | 4.77E-10 | 2.2E-09  |
| LOC114279228 | 17.4699  | 17.42788 | 17.55707 | 7.546757 | 8.115502 | 8.118426 | 1.032541 | 4.768594 | 385.7994 | 3.93E-34 | 1.26E-32 |
| LOC114279312 | 2.963179 | 3.124689 | 2.756206 | 0.313502 | 0.628322 | 0.624895 | 2.34232  | 1.774087 | 201.8887 | 1.27E-24 | 1.99E-23 |
| LOC114279315 | 1.201966 | 1.282178 | 1.251142 | 0.613322 | 0.301818 | 0.55066  | 1.26083  | 0.411942 | 28.26985 | 7.75E-07 | 2.56E-06 |
| LOC114279324 | 0.58771  | 0.54144  | 0.572362 | 0.024281 | 0.057353 | 0        | 4.188862 | -0.34802 | 81.59618 | 3.18E-14 | 2.13E-13 |
| LOC114279327 | 0.51432  | 0.515657 | 0.425764 | 0.064037 | 0.141178 | 0.106516 | 2.068208 | 0.45336  | 66.54232 | 2.05E-12 | 1.17E-11 |
| LOC114279329 | 1.909501 | 1.845742 | 1.791484 | 4.025878 | 3.644069 | 3.822781 | -1.15085 | 3.315961 | 221.0627 | 7.32E-26 | 1.27E-24 |

|              |          |          |          |          |          |          |          |          |          |          |          |
|--------------|----------|----------|----------|----------|----------|----------|----------|----------|----------|----------|----------|
| LOC114279344 | 4.773414 | 4.782909 | 5.383377 | 1.605476 | 1.685464 | 1.676271 | 1.477076 | 2.266448 | 139.7872 | 5.97E-20 | 6.37E-19 |
| LOC114279438 | 0.501032 | 0.523864 | 0.314574 | 8.587415 | 7.581011 | 7.869921 | -4.24456 | 1.857882 | 556.3277 | 4.43E-40 | 2.24E-38 |
| LOC114279472 | 11.29464 | 11.57046 | 11.05219 | 23.40843 | 21.9993  | 22.7934  | -1.11179 | 4.583537 | 411.9548 | 3.59E-35 | 1.25E-33 |
| LOC114279474 | 0        | 0.047672 | 0        | 0.53873  | 0.621118 | 0.567335 | -5.21049 | -0.20753 | 142.0152 | 1.08E-19 | 1.14E-18 |
| LOC114279475 | 25.09707 | 23.25825 | 21.78464 | 0.849859 | 0.851646 | 1.285106 | 4.424422 | 4.082063 | 2154.491 | 1.39E-58 | 2.91E-56 |
| LOC114279491 | 60.69139 | 57.99682 | 58.14113 | 8.795229 | 9.45211  | 9.543055 | 2.560958 | 5.88646  | 4033.465 | 5.53E-76 | 4.19E-73 |
| LOC114279513 | 3.516031 | 3.526023 | 3.62176  | 25.81574 | 26.85292 | 29.6364  | -3.05605 | 4.124064 | 1843.675 | 2.54E-61 | 6.25E-59 |
| LOC114279516 | 1718.807 | 1601.985 | 1723.132 | 661.5155 | 684.1416 | 712.8652 | 1.187196 | 9.575128 | 2721.3   | 1.6E-22  | 2.12E-21 |
| LOC114279530 | 5.37475  | 5.585477 | 5.641933 | 2.080903 | 2.512264 | 2.607196 | 1.084563 | 3.452807 | 198.3931 | 2.19E-24 | 3.36E-23 |
| LOC114279578 | 13.74596 | 11.71401 | 12.93541 | 5.5133   | 5.577935 | 4.840768 | 1.16834  | 4.055248 | 306.3696 | 4.43E-30 | 1.06E-28 |
| LOC114279591 | 0.711745 | 0.711263 | 0.703821 | 0        | 0.025468 | 0        | 5.996603 | 0.419512 | 187.5251 | 1.23E-23 | 1.79E-22 |
| LOC114279635 | 1.166215 | 1.291975 | 1.343371 | 3.179956 | 2.82686  | 2.766201 | -1.30532 | 1.774519 | 89.34251 | 4.31E-15 | 3.11E-14 |
| LOC114279611 | 2.640268 | 1.938871 | 2.774843 | 1.043377 | 0.903672 | 1.419959 | 1.008161 | 0.044402 | 14.36473 | 0.000273 | 0.000644 |
| LOC114279644 | 2.249506 | 1.92058  | 1.629643 | 0.089873 | 0        | 0        | 5.974601 | 0.399465 | 176.5743 | 1.25E-22 | 1.66E-21 |
| LOC114279649 | 2.190981 | 1.622163 | 1.978621 | 6.110615 | 5.197915 | 6.517572 | -1.71753 | 2.00913  | 165.5147 | 5.03E-22 | 6.37E-21 |
| LOC114279650 | 0.224877 | 0.084404 | 0.247082 | 3.406549 | 2.467626 | 2.575588 | -3.90787 | -0.66971 | 84.5327  | 1.47E-14 | 1.01E-13 |
| LOC114279676 | 0        | 0        | 0        | 4.717052 | 3.479829 | 3.79133  | -10.1364 | 1.380356 | 569.6481 | 1.05E-39 | 5.2E-38  |
| LOC114279727 | 8.304505 | 7.391627 | 7.821005 | 3.162994 | 2.377233 | 3.478464 | 1.278418 | 1.108564 | 49.32476 | 4.15E-10 | 1.93E-09 |
| LOC114279762 | 56.03733 | 48.29199 | 51.93887 | 15.497   | 15.68357 | 16.38546 | 1.609111 | 5.522913 | 1388.039 | 2.58E-53 | 3.54E-51 |
| LOC114279853 | 1.589364 | 1.330123 | 1.06194  | 2.381622 | 2.766702 | 3.217594 | -1.18215 | 1.564857 | 61.35109 | 1.01E-11 | 5.44E-11 |
| LOC114279859 | 5.503221 | 5.163845 | 5.235486 | 1.097986 | 1.088651 | 1.38359  | 2.037057 | 2.148411 | 220.8388 | 7.56E-26 | 1.31E-24 |
| LOC114279874 | 0.855457 | 0.794676 | 0.857683 | 1.671699 | 1.867224 | 1.763611 | -1.18769 | 1.904251 | 82.14739 | 2.75E-14 | 1.85E-13 |
| LOC114279946 | 1.717641 | 1.610958 | 1.634131 | 0.448151 | 0.323936 | 0.416599 | 1.967456 | 2.933218 | 361.4041 | 4.15E-33 | 1.23E-31 |
| LOC114279948 | 1.608289 | 1.629837 | 1.799223 | 0.637873 | 0.669653 | 0.502371 | 1.37529  | 1.286774 | 63.6911  | 4.73E-12 | 2.61E-11 |
| LOC114279955 | 0.026518 | 0.099531 | 0.048561 | 0.433848 | 0.493418 | 0.473805 | -3.11821 | -0.10831 | 96.23657 | 7.82E-16 | 5.95E-15 |
| LOC114279959 | 11.80503 | 11.40555 | 11.54867 | 2.597434 | 2.976685 | 3.279923 | 1.858037 | 4.849609 | 1125.06  | 2.07E-50 | 2.22E-48 |

|              |          |          |          |          |          |          |          |          |          |          |          |
|--------------|----------|----------|----------|----------|----------|----------|----------|----------|----------|----------|----------|
| LOC114279983 | 0.155729 | 0        | 0.085553 | 3.963216 | 4.346415 | 3.424534 | -5.45448 | -0.33243 | 142.4452 | 3.56E-20 | 3.86E-19 |
| LOC114280033 | 10.69159 | 10.53795 | 10.63306 | 43.66383 | 40.93185 | 40.45972 | -2.07589 | 4.795874 | 1508.177 | 1.25E-57 | 2.47E-55 |
| LOC114280034 | 0.78147  | 0.703947 | 0.789943 | 3.352553 | 3.534497 | 3.007347 | -2.21417 | 0.998805 | 135.2141 | 1.48E-19 | 1.53E-18 |
| LOC114280054 | 7.709062 | 7.457459 | 8.212884 | 2.903391 | 2.712758 | 2.663468 | 1.396152 | 2.903207 | 203.2914 | 1.03E-24 | 1.62E-23 |
| LOC114280018 | 0.041563 | 0.163801 | 0.137002 | 2.531089 | 2.230852 | 1.885117 | -4.36332 | 0.772154 | 258.4785 | 4.49E-28 | 9.15E-27 |
| LOC114280057 | 0.059396 | 0.178346 | 0.087014 | 1.439614 | 1.501892 | 1.659884 | -3.92523 | 0.352353 | 179.9623 | 4.25E-23 | 5.93E-22 |
| LOC114280075 | 0.536047 | 0.431134 | 0.967605 | 1.600861 | 1.863295 | 1.789232 | -1.55059 | -0.01081 | 33.73608 | 9.6E-08  | 3.52E-07 |
| LOC114280193 | 8.998768 | 10.07062 | 9.161647 | 23.76184 | 24.69625 | 21.93696 | -1.424   | 4.193809 | 505.6436 | 3.93E-38 | 1.73E-36 |
| LOC114280201 | 2.254643 | 2.01486  | 2.24134  | 0.520449 | 0.973238 | 1.032927 | 1.213671 | 0.452476 | 27.48289 | 1.06E-06 | 3.44E-06 |
| LOC114280206 | 6.411954 | 5.869917 | 6.038641 | 2.571129 | 2.776349 | 2.406799 | 1.136166 | 3.280639 | 192.0565 | 5.93E-24 | 8.85E-23 |
| LOC114280210 | 2.186155 | 2.262016 | 2.129358 | 0        | 0.016914 | 0        | 8.038434 | 1.536193 | 484.509  | 8.57E-38 | 3.67E-36 |
| LOC114280235 | 0.023233 | 0.01308  | 0        | 0.675742 | 0.598563 | 0.73443  | -5.65625 | -0.14469 | 168.2143 | 3.14E-22 | 4.05E-21 |
| LOC114280241 | 3.060538 | 2.975538 | 3.155347 | 0.073527 | 0.07719  | 0.037061 | 5.489222 | 1.83681  | 533.9679 | 2.14E-39 | 1.03E-37 |
| LOC114280246 | 0.074496 | 0.167764 | 0.122777 | 2.031297 | 2.185812 | 2.354896 | -4.23922 | -0.05631 | 147.9731 | 1.23E-20 | 1.39E-19 |
| LOC114280278 | 0.226143 | 0.203709 | 0.260896 | 0        | 0        | 0.00777  | 5.85573  | -0.43944 | 95.00286 | 1.06E-15 | 7.98E-15 |
| LOC114280263 | 1.796951 | 2.230887 | 2.02501  | 0.335029 | 0.329739 | 0.316632 | 2.491958 | -0.19525 | 53.98436 | 9.23E-11 | 4.55E-10 |
| LOC114280312 | 0        | 0.142924 | 0.111572 | 1.153692 | 1.41707  | 0.942053 | -3.87918 | -0.37239 | 95.88205 | 2.58E-15 | 1.89E-14 |
| LOC114280320 | 0.543467 | 0.651002 | 0.5209   | 0.168157 | 0.198602 | 0.143031 | 1.633706 | 0.092927 | 35.25239 | 5.48E-08 | 2.06E-07 |
| LOC114280323 | 0.925685 | 0.905172 | 0.669137 | 0.044282 | 0        | 0        | 5.608046 | -0.64822 | 77.01153 | 1.09E-13 | 6.92E-13 |
| LOC114280353 | 0.140373 | 0        | 0        | 18.2024  | 14.66681 | 16.39898 | -8.2513  | 2.43746  | 1058.045 | 1.18E-47 | 1.01E-45 |
| LOC114280397 | 0.945679 | 1.010688 | 0.915779 | 3.059371 | 3.097087 | 2.797746 | -1.74175 | 1.917383 | 166.0384 | 4.59E-22 | 5.83E-21 |
| LOC114280399 | 8.341928 | 8.393738 | 9.165624 | 1.8283   | 2.258105 | 1.870201 | 2.005574 | 3.017838 | 402.149  | 8.67E-35 | 2.95E-33 |
| LOC114280408 | 0.077624 | 0.069923 | 0.102346 | 0.423318 | 0.711053 | 0.746801 | -3.01679 | -0.44775 | 73.00469 | 3.27E-13 | 2E-12    |
| LOC114280415 | 12.87031 | 12.0448  | 11.32986 | 26.02973 | 24.20123 | 26.20508 | -1.1799  | 5.21809  | 722.1559 | 6.87E-44 | 4.57E-42 |
| LOC114280409 | 1.390457 | 1.331972 | 1.276928 | 0.41498  | 0.504963 | 0.456369 | 1.418911 | 0.485364 | 38.22288 | 1.86E-08 | 7.36E-08 |
| LOC114280422 | 9.909368 | 9.509597 | 8.314348 | 2.988597 | 2.933343 | 3.033419 | 1.52573  | 3.032928 | 254.75   | 7.27E-28 | 1.45E-26 |

|              |          |          |          |          |          |          |          |          |          |          |          |
|--------------|----------|----------|----------|----------|----------|----------|----------|----------|----------|----------|----------|
| LOC114280404 | 5.333847 | 4.272238 | 4.501122 | 1.799254 | 1.495377 | 2.040543 | 1.298202 | 1.858558 | 82.43411 | 2.55E-14 | 1.72E-13 |
| LOC114280446 | 2.272361 | 2.447427 | 2.333908 | 0.673491 | 0.388875 | 0.339471 | 2.266945 | 0.863216 | 103.463  | 1.4E-16  | 1.13E-15 |
| LOC114280492 | 3.344522 | 3.064429 | 3.134359 | 0.834475 | 0.657037 | 0.901316 | 1.887801 | 0.946874 | 86.11387 | 9.8E-15  | 6.83E-14 |
| LOC114280510 | 3.897532 | 3.987368 | 3.572729 | 9.311736 | 9.053116 | 9.336079 | -1.3776  | 3.166144 | 271.1874 | 9.01E-29 | 1.94E-27 |
| LOC114280547 | 0.337994 | 0.234204 | 0.314235 | 0.897989 | 1.302453 | 1.214949 | -2.04971 | -0.18574 | 50.11867 | 3.2E-10  | 1.5E-09  |
| LOC114280552 | 1.451909 | 1.434076 | 1.343388 | 0        | 0        | 0        | 8.423238 | -0.06514 | 144.1275 | 3.67E-20 | 3.98E-19 |
| LOC114280581 | 11.85619 | 12.13148 | 12.04922 | 4.633994 | 4.302654 | 4.296895 | 1.343696 | 3.359466 | 286.2413 | 1.44E-29 | 3.32E-28 |
| LOC114280586 | 66.81483 | 62.50011 | 67.83291 | 160.7793 | 151.7194 | 158.6368 | -1.36229 | 7.672662 | 2049.709 | 7.67E-39 | 3.55E-37 |
| LOC114280620 | 1.243093 | 1.840372 | 1.618771 | 0.544007 | 0.658973 | 0.696058 | 1.172688 | 0.61763  | 28.57568 | 6.88E-07 | 2.29E-06 |
| LOC114280640 | 1.81527  | 1.721907 | 1.873634 | 0.259987 | 0.157466 | 0.287292 | 2.833408 | 1.527201 | 230.913  | 1.81E-26 | 3.29E-25 |
| LOC114280715 | 2.244992 | 2.029406 | 2.501409 | 0.287394 | 0.497826 | 0.304206 | 2.497555 | 0.443165 | 88.04142 | 5.99E-15 | 4.27E-14 |
| LOC114280724 | 4.684258 | 4.518672 | 4.472058 | 1.869178 | 2.003185 | 2.316125 | 1.027805 | 2.811943 | 107.2338 | 5.85E-17 | 4.88E-16 |
| LOC114280730 | 0.675958 | 0.400593 | 0.605889 | 0.097008 | 0.178222 | 0.036672 | 2.326358 | 0.305601 | 60.35379 | 1.32E-10 | 6.4E-10  |
| LOC114280739 | 2.18081  | 2.422404 | 1.942822 | 0.991081 | 1.181061 | 0.830334 | 1.018394 | 1.737229 | 48.00643 | 6.4E-10  | 2.92E-09 |
| LOC114280740 | 0.965044 | 0.842144 | 0.715725 | 0.175428 | 0.138126 | 0.331589 | 1.820344 | -0.39125 | 28.26944 | 7.75E-07 | 2.56E-06 |
| LOC114280747 | 6.182278 | 5.900911 | 6.072968 | 15.70382 | 13.82967 | 14.34911 | -1.37114 | 2.950995 | 221.4572 | 6.91E-26 | 1.2E-24  |
| LOC114280764 | 0.320569 | 0.31584  | 0.220139 | 2.258107 | 3.383855 | 2.258024 | -3.28899 | 0.177712 | 127.4428 | 7.18E-19 | 7.05E-18 |
| LOC114280768 | 1.600157 | 2.181094 | 1.850694 | 0.153095 | 0.096433 | 0.11575  | 3.835553 | 0.924911 | 202.61   | 1.14E-24 | 1.79E-23 |
| LOC114280833 | 0.860455 | 0.790915 | 0.906829 | 1.883369 | 1.709107 | 1.568767 | -1.10493 | 1.178055 | 43.8274  | 2.62E-09 | 1.12E-08 |
| LOC114280852 | 0.675161 | 0.620187 | 0.449001 | 0.032298 | 0.076291 | 0.073258 | 3.055527 | -0.61128 | 48.91419 | 4.74E-10 | 2.19E-09 |
| LOC114280868 | 15.83808 | 18.45126 | 18.00462 | 3.801383 | 4.661356 | 4.38184  | 1.90454  | 3.248802 | 436.899  | 6.86E-36 | 2.54E-34 |
| LOC114280867 | 10.59053 | 8.750656 | 10.21312 | 3.324033 | 3.489643 | 2.565559 | 1.559503 | 2.373622 | 156.061  | 2.74E-21 | 3.28E-20 |
| LOC114280891 | 1.202591 | 1.070395 | 1.11999  | 0.1041   | 0.213108 | 0.267603 | 2.36831  | 0.890204 | 112.4499 | 1.8E-17  | 1.57E-16 |
| LOC114280907 | 0.272507 | 0.193795 | 0.362449 | 0.834304 | 1.005883 | 1.005325 | -1.88672 | 0.415187 | 66.78292 | 1.91E-12 | 1.09E-11 |
| LOC114280941 | 0.398916 | 0.334004 | 0.438305 | 0.092969 | 0.087841 | 0.238989 | 1.319019 | -0.18348 | 18.80593 | 3.8E-05  | 0.000102 |
| LOC114280959 | 1.062642 | 0.769199 | 0.806179 | 0.045993 | 0.108639 | 0.034774 | 3.64395  | 0.312693 | 120.2908 | 3.24E-18 | 3.02E-17 |

|              |          |          |          |          |          |          |          |          |          |          |          |
|--------------|----------|----------|----------|----------|----------|----------|----------|----------|----------|----------|----------|
| LOC114281011 | 2.548915 | 2.218583 | 2.766236 | 0        | 0        | 0        | 9.957346 | 1.33615  | 424.1315 | 3.15E-35 | 1.11E-33 |
| LOC114281024 | 1.380489 | 1.250828 | 1.362751 | 2.764352 | 2.34636  | 2.66814  | -1.05999 | 2.477382 | 93.06749 | 1.7E-15  | 1.26E-14 |
| LOC114281025 | 0.423287 | 0.515266 | 0.326815 | 0.16637  | 0.11462  | 0.204404 | 1.263573 | -0.21206 | 17.37854 | 7.08E-05 | 0.000182 |
| LOC114281078 | 0.345645 | 0.264869 | 0.316478 | 1.108287 | 0.817659 | 1.029283 | -1.76069 | 2.046543 | 173.1773 | 1.33E-22 | 1.78E-21 |
| LOC114281100 | 0.737963 | 0.997134 | 1.05408  | 0.134148 | 0.17604  | 0.202851 | 2.277298 | -0.36112 | 40.98714 | 6.99E-09 | 2.88E-08 |
| LOC114281117 | 32.00579 | 32.04081 | 32.41026 | 14.25623 | 14.03109 | 13.40055 | 1.106006 | 5.28072  | 670.1106 | 3.16E-43 | 2.01E-41 |
| LOC114281123 | 72.26976 | 69.73306 | 74.02336 | 28.2923  | 27.3992  | 29.61441 | 1.23481  | 6.367656 | 1291.483 | 4.23E-51 | 4.98E-49 |
| LOC114281155 | 0.828473 | 0.694682 | 0.735969 | 0.240322 | 0.126147 | 0.278606 | 1.706883 | 0.810159 | 62.9274  | 5.93E-12 | 3.24E-11 |
| LOC114281158 | 1.982466 | 1.648433 | 1.776086 | 0.055443 | 0.218268 | 0.209592 | 3.27338  | 0.121335 | 95.52614 | 9.3E-16  | 7.05E-15 |
| LOC114281162 | 1.359735 | 1.629837 | 0.96387  | 2.471756 | 3.013436 | 2.531949 | -1.1289  | 0.51379  | 27.617   | 1E-06    | 3.27E-06 |
| LOC114281167 | 9.547244 | 9.462394 | 8.413818 | 4.158013 | 3.487394 | 3.827171 | 1.159434 | 1.999289 | 75.43276 | 1.67E-13 | 1.05E-12 |
| LOC114281180 | 0.464306 | 0.609943 | 0.527158 | 0        | 0.022152 | 0.021271 | 4.785805 | -0.62982 | 72.6888  | 3.57E-13 | 2.17E-12 |
| LOC114281181 | 0.478486 | 0.35083  | 0.415695 | 0.040456 | 0.159268 | 0.076469 | 2.000119 | -0.33367 | 33.62409 | 1E-07    | 3.66E-07 |
| LOC114281178 | 0.79687  | 0.69788  | 0.713415 | 2.092375 | 2.196621 | 2.35269  | -1.69027 | 0.636447 | 66.97949 | 1.81E-12 | 1.03E-11 |
| LOC114281220 | 10.10137 | 10.29819 | 11.39877 | 18.11435 | 20.56359 | 21.0126  | -1.02239 | 3.77073  | 230.8809 | 1.81E-26 | 3.3E-25  |
| LOC114281225 | 4.405328 | 5.723527 | 5.241291 | 2.037564 | 2.425119 | 2.328724 | 1.057095 | 2.117302 | 65.63108 | 2.67E-12 | 1.51E-11 |
| LOC114281199 | 2.128996 | 2.028438 | 1.799398 | 5.060946 | 3.750418 | 5.402016 | -1.34752 | 0.3626   | 35.36103 | 5.26E-08 | 1.99E-07 |
| LOC114281227 | 1.097887 | 1.104706 | 1.334623 | 0.042463 | 0        | 0.19263  | 3.67056  | -0.1095  | 83.15029 | 3.53E-14 | 2.35E-13 |
| LOC114281238 | 5.625139 | 6.184422 | 5.961794 | 0.361965 | 0.474998 | 0.456117 | 3.64855  | 2.533685 | 614.523  | 9.4E-42  | 5.39E-40 |
| LOC114281330 | 0.310289 | 0.349385 | 0.292223 | 0.048347 | 0.038067 | 0.085292 | 2.310797 | -0.43075 | 39.83875 | 1.05E-08 | 4.24E-08 |
| LOC114281307 | 1.891789 | 2.282303 | 1.744528 | 0.06141  | 0.048352 | 0        | 5.546053 | 0.022948 | 132.557  | 2.52E-19 | 2.56E-18 |
| LOC114281309 | 1.77837  | 1.520371 | 1.519754 | 0.957854 | 0.65991  | 0.633679 | 1.023463 | 0.222729 | 17.0801  | 8.08E-05 | 0.000206 |
| LOC114281370 | 0.698817 | 0.719033 | 0.741343 | 3.460541 | 3.2938   | 3.278793 | -2.31731 | 2.373206 | 361.632  | 4.05E-33 | 1.21E-31 |
| LOC114281381 | 24.10679 | 24.29648 | 24.68388 | 3.17904  | 3.196227 | 2.477532 | 2.948272 | 3.913133 | 1370.857 | 6.85E-56 | 1.16E-53 |
| LOC114281414 | 0.630701 | 0.433991 | 0.577481 | 1.847142 | 1.905736 | 1.34841  | -1.71016 | 0.013086 | 41.87343 | 5.13E-09 | 2.14E-08 |
| LOC114281462 | 3.686921 | 3.951875 | 4.830007 | 0.064444 | 0        | 0        | 7.373254 | 0.91881  | 289.2164 | 1.02E-29 | 2.36E-28 |

|              |          |          |          |          |          |          |          |          |          |          |          |
|--------------|----------|----------|----------|----------|----------|----------|----------|----------|----------|----------|----------|
| LOC114281472 | 32.01864 | 28.77049 | 31.54748 | 9.489812 | 8.883329 | 11.04147 | 1.541204 | 4.381683 | 596.3004 | 1.08E-40 | 5.7E-39  |
| LOC114281490 | 6.045443 | 6.068395 | 6.899837 | 2.811277 | 2.213505 | 1.803473 | 1.394981 | 1.510672 | 74.58641 | 2.11E-13 | 1.31E-12 |
| LOC114281496 | 1.249346 | 1.23879  | 1.167827 | 0.033897 | 0.026689 | 0        | 5.71148  | 0.166445 | 153.9681 | 4.03E-21 | 4.74E-20 |
| LOC114281498 | 11.30379 | 11.9378  | 10.68083 | 1.112918 | 1.068628 | 1.067197 | 3.279024 | 3.625207 | 1302.331 | 5.84E-55 | 8.93E-53 |
| LOC114281509 | 41.33189 | 40.99806 | 39.38701 | 80.7444  | 78.08137 | 83.03155 | -1.09552 | 6.47059  | 1056.718 | 6.2E-40  | 3.1E-38  |
| LOC114281515 | 0.22555  | 0.231394 | 0.247821 | 0.082002 | 0.078913 | 0.110221 | 1.250121 | 0.103053 | 22.7388  | 7.19E-06 | 2.12E-05 |
| LOC114281558 | 0.285199 | 0.329584 | 0.321606 | 1.487105 | 1.084959 | 1.052149 | -2.03688 | 1.632388 | 169.8169 | 2.38E-22 | 3.09E-21 |
| LOC114281607 | 3.707661 | 4.11574  | 3.727876 | 9.44217  | 9.537119 | 9.037848 | -1.38404 | 3.529832 | 358.0336 | 5.8E-33  | 1.7E-31  |
| LOC114281619 | 0.025955 | 0.014613 | 0.028518 | 3.821672 | 3.139077 | 2.853778 | -7.10833 | 1.959381 | 785.3157 | 5.79E-46 | 4.42E-44 |
| LOC114281606 | 28.6821  | 28.79401 | 28.17296 | 11.05597 | 14.54147 | 11.49374 | 1.092301 | 3.159061 | 153.5537 | 4.35E-21 | 5.1E-20  |
| LOC114281649 | 0.585255 | 0.851872 | 0.70578  | 0.18164  | 0.040862 | 0.098094 | 2.679218 | -0.04148 | 62.56111 | 6.62E-12 | 3.6E-11  |
| LOC114281666 | 2.874576 | 2.808918 | 2.232674 | 0.961005 | 0.638435 | 0.476823 | 1.869263 | 1.640769 | 122.3769 | 1.33E-17 | 1.17E-16 |
| LOC114281633 | 6.196408 | 6.666059 | 6.157782 | 0.035872 | 0.05649  | 0.135611 | 6.153006 | 2.304161 | 754.4686 | 2.87E-45 | 2.06E-43 |
| LOC114281671 | 0.241997 | 0.250689 | 0.255257 | 0.739045 | 0.55419  | 0.425729 | -1.26977 | 0.40225  | 31.37255 | 2.34E-07 | 8.19E-07 |
| LOC114281693 | 0.609353 | 0.741463 | 0.485943 | 0        | 0        | 0        | 8.590672 | 0.085994 | 155.2323 | 6.57E-21 | 7.59E-20 |
| LOC114281727 | 5.103555 | 5.098691 | 4.810346 | 1.95552  | 2.13053  | 2.389684 | 1.096812 | 3.111351 | 154.6058 | 3.58E-21 | 4.24E-20 |
| LOC114281734 | 1.573372 | 1.540533 | 1.428081 | 0.186529 | 0.342689 | 0.376077 | 2.159222 | -0.13944 | 46.00731 | 1.25E-09 | 5.52E-09 |
| LOC114281703 | 4.278439 | 4.44374  | 4.13355  | 0.134094 | 0.05279  | 0.050692 | 5.635343 | 0.924951 | 277.7977 | 4E-29    | 8.86E-28 |
| LOC114281704 | 4.499738 | 5.025164 | 4.417224 | 2.346641 | 1.478133 | 1.520764 | 1.307681 | 1.436549 | 62.21957 | 7.33E-12 | 3.98E-11 |
| LOC114281739 | 6.511403 | 7.003044 | 7.362885 | 2.919333 | 2.674717 | 3.090107 | 1.157075 | 3.344079 | 207.9494 | 5.06E-25 | 8.23E-24 |
| LOC114281760 | 3.057021 | 3.395366 | 3.495973 | 0.718267 | 0.446478 | 0.828881 | 2.209174 | 1.570318 | 163.7328 | 6.9E-22  | 8.65E-21 |
| LOC114281779 | 11.51829 | 12.28025 | 12.70546 | 32.14921 | 35.30868 | 35.24521 | -1.60105 | 4.972245 | 1057.587 | 7.18E-51 | 8.18E-49 |
| LOC114281786 | 9.192346 | 8.084462 | 7.98439  | 2.076396 | 2.304408 | 2.242714 | 1.821097 | 3.866002 | 641.1152 | 1.8E-42  | 1.08E-40 |
| LOC114281787 | 0.886279 | 0.698564 | 0.584275 | 0.060416 | 0.04757  | 0.091358 | 3.297493 | 0.252758 | 104.1277 | 1.2E-16  | 9.76E-16 |
| LOC114281832 | 9.432332 | 8.187148 | 9.018475 | 1.43075  | 0.894067 | 1.1676   | 2.848366 | 3.580879 | 978.3593 | 2.9E-46  | 2.26E-44 |
| LOC114281841 | 0.182997 | 0.480793 | 0.268088 | 3.880983 | 3.143063 | 2.431272 | -3.40554 | -0.19219 | 100.0895 | 3.1E-16  | 2.44E-15 |

|              |          |          |          |          |          |          |          |          |          |          |          |
|--------------|----------|----------|----------|----------|----------|----------|----------|----------|----------|----------|----------|
| LOC114281905 | 16.84291 | 15.58584 | 16.92458 | 33.84614 | 31.03242 | 31.90337 | -1.07429 | 4.60147  | 384.8895 | 4.28E-34 | 1.37E-32 |
| LOC114281960 | 0.706091 | 0.724905 | 0.935538 | 0.415266 | 0.297242 | 0.342512 | 1.068901 | -0.12546 | 14.14628 | 0.000302 | 0.000708 |
| LOC114281967 | 3.635595 | 3.673808 | 4.097005 | 12.20098 | 11.84152 | 12.1716  | -1.77217 | 3.3857   | 521.1761 | 5.39E-39 | 2.54E-37 |
| LOC114282015 | 2.53686  | 1.838095 | 2.351073 | 5.333368 | 4.262463 | 4.911643 | -1.19961 | 2.296616 | 100.437  | 2.85E-16 | 2.25E-15 |
| LOC114282033 | 0.183581 | 0.206712 | 0.345785 | 1.096499 | 0.938421 | 1.622015 | -2.42321 | -0.18121 | 63.0563  | 5.71E-12 | 3.13E-11 |
| LOC114282042 | 1.677296 | 1.563005 | 1.864098 | 4.205551 | 3.752818 | 3.842125 | -1.3074  | 2.163693 | 114.4852 | 1.15E-17 | 1.02E-16 |
| LOC114282061 | 1.47371  | 1.834067 | 1.40617  | 0.422991 | 0.388557 | 0.266509 | 2.025141 | -0.23162 | 38.2832  | 1.82E-08 | 7.22E-08 |
| LOC114282086 | 2.861415 | 3.05087  | 2.698794 | 6.996764 | 6.197645 | 5.672874 | -1.22708 | 2.469633 | 119.2138 | 4.09E-18 | 3.77E-17 |
| LOC114282101 | 17.749   | 16.42243 | 16.30119 | 41.7496  | 42.61993 | 43.34511 | -1.44447 | 5.439946 | 1219.048 | 9.15E-54 | 1.29E-51 |
| LOC114282126 | 0.679814 | 0.593516 | 0.573736 | 2.301417 | 2.411377 | 2.383234 | -2.04403 | 3.217541 | 565.3096 | 2.39E-40 | 1.23E-38 |
| LOC114282143 | 0.77615  | 0.708602 | 0.772119 | 0.019066 | 0.060048 | 0        | 4.640962 | 0.30927  | 146.1189 | 1.76E-20 | 1.95E-19 |
| LOC114282178 | 4.785395 | 5.225061 | 5.03485  | 0.527212 | 0.435864 | 0.577983 | 3.175469 | 2.527841 | 523.0218 | 4.71E-39 | 2.23E-37 |
| LOC114282170 | 2.137675 | 2.320016 | 2.094069 | 0.561818 | 0.442357 | 0.247785 | 2.314853 | 0.700372 | 94.27143 | 1.26E-15 | 9.48E-15 |
| LOC114282184 | 13.92854 | 13.48955 | 12.90866 | 0.175343 | 0.248507 | 0.185601 | 5.910482 | 3.393969 | 1826.129 | 3.81E-61 | 9.25E-59 |
| LOC114282251 | 33.2794  | 31.90289 | 33.80458 | 1.654469 | 1.784096 | 2.175467 | 4.018863 | 4.695874 | 3138.344 | 3.02E-71 | 1.5E-68  |
| LOC114282205 | 6.07134  | 5.881242 | 8.142342 | 0.405758 | 0.702856 | 0.674919 | 3.335872 | 1.356321 | 235.3917 | 1.53E-26 | 2.8E-25  |
| LOC114282233 | 5.609756 | 6.914087 | 5.49733  | 13.78045 | 13.67134 | 11.40879 | -1.21067 | 2.936965 | 155.7953 | 2.03E-20 | 2.25E-19 |
| LOC114282237 | 2.022382 | 1.973571 | 1.999868 | 10.90644 | 11.19252 | 11.76681 | -2.59981 | 1.598689 | 265.786  | 1.77E-28 | 3.73E-27 |
| LOC114282260 | 0.60853  | 0.329913 | 0.420981 | 1.27008  | 1.000018 | 0.991245 | -1.32605 | 0.106143 | 27.82235 | 9.24E-07 | 3.03E-06 |
| LOC114282289 | 1.28033  | 0.978262 | 0.653135 | 1.828681 | 2.290657 | 2.073915 | -1.18641 | 0.08089  | 22.13763 | 9.23E-06 | 2.68E-05 |
| LOC114282323 | 327.9208 | 328.3056 | 327.0538 | 847.3791 | 835.416  | 863.759  | -1.47804 | 8.754516 | 3651.935 | 2.04E-37 | 8.51E-36 |
| LOC114282372 | 0.96677  | 0.770381 | 1.078573 | 5.299285 | 5.641362 | 4.660772 | -2.56792 | 2.666617 | 487.3645 | 8.75E-38 | 3.74E-36 |
| LOC114282381 | 1.062165 | 1.212379 | 1.087111 | 1.71923  | 2.207513 | 2.299748 | -1.01217 | 1.759638 | 53.26273 | 1.16E-10 | 5.68E-10 |
| LOC114282383 | 0.562792 | 0.615597 | 0.512358 | 0.05846  | 0.092059 | 0        | 3.358927 | -0.54763 | 55.09638 | 6.5E-11  | 3.24E-10 |
| LOC114282419 | 2.545438 | 2.718634 | 2.220971 | 0.204139 | 0.401831 | 0.694545 | 2.347277 | 1.298675 | 135.5295 | 3.08E-18 | 2.87E-17 |
| LOC114282424 | 4.379977 | 4.106342 | 4.667883 | 1.298526 | 1.695058 | 1.653518 | 1.377645 | 2.267959 | 121.7534 | 2.37E-18 | 2.23E-17 |

|              |          |          |          |          |          |          |          |          |          |          |          |
|--------------|----------|----------|----------|----------|----------|----------|----------|----------|----------|----------|----------|
| LOC114282409 | 10.25821 | 9.720137 | 10.44088 | 3.912664 | 4.358864 | 4.122664 | 1.184442 | 3.23082  | 201.9782 | 1.26E-24 | 1.97E-23 |
| LOC114282429 | 16.51631 | 17.31135 | 16.03965 | 7.000209 | 6.24523  | 7.144066 | 1.186281 | 4.577994 | 424.139  | 1.23E-35 | 4.44E-34 |
| LOC114282434 | 1.905853 | 2.061499 | 2.192971 | 3.791855 | 4.424672 | 3.815667 | -1.07702 | 2.630169 | 105.9299 | 7.9E-17  | 6.52E-16 |
| LOC114282466 | 4.935336 | 5.871735 | 5.954695 | 1.252633 | 0.666406 | 0.895884 | 2.496536 | 2.409745 | 317.4839 | 1.8E-29  | 4.11E-28 |
| LOC114282515 | 3.179132 | 3.118508 | 3.514474 | 1.028182 | 0.837472 | 1.152663 | 1.591281 | 1.757517 | 113.1055 | 1.56E-17 | 1.36E-16 |
| LOC114282518 | 6.072011 | 6.394872 | 6.140502 | 12.46561 | 11.60938 | 12.35198 | -1.07361 | 4.212758 | 318.7488 | 3.53E-31 | 9.13E-30 |
| LOC114282503 | 1.256343 | 1.287956 | 1.359794 | 0.20452  | 0.21471  | 0.12886  | 2.725251 | 0.381269 | 95.45914 | 9.45E-16 | 7.16E-15 |
| LOC114282526 | 16.57897 | 17.82431 | 16.60019 | 36.34166 | 34.45222 | 37.4112  | -1.19005 | 5.868722 | 995.7761 | 1.36E-49 | 1.36E-47 |
| LOC114282551 | 2.60438  | 2.359767 | 2.906252 | 4.882244 | 5.911783 | 5.481047 | -1.16046 | 2.60026  | 118.5694 | 4.7E-18  | 4.3E-17  |
| LOC114282580 | 2.155567 | 1.85165  | 2.441661 | 1.009906 | 0.890586 | 1.007898 | 1.044922 | 1.138158 | 34.73797 | 6.62E-08 | 2.47E-07 |
| LOC114282588 | 3.818341 | 3.834136 | 3.88662  | 9.134558 | 8.824695 | 9.700714 | -1.36785 | 3.597021 | 375.4189 | 1.06E-33 | 3.27E-32 |
| LOC114282614 | 0.100557 | 0.150969 | 0.165729 | 0.670245 | 0.359815 | 0.644957 | -2.0854  | -0.58603 | 36.70138 | 3.22E-08 | 1.24E-07 |
| LOC114282634 | 5.064127 | 4.352821 | 3.971372 | 8.748908 | 8.65916  | 9.351021 | -1.10145 | 3.403836 | 205.8863 | 8.9E-25  | 1.41E-23 |
| LOC114282636 | 0.173243 | 0.109728 | 0.214143 | 0.590485 | 0.604406 | 0.632467 | -1.97648 | 1.141297 | 118.3031 | 4.98E-18 | 4.54E-17 |
| LOC114282655 | 0.623265 | 0.549231 | 0.4615   | 0.246301 | 0.13575  | 0.242087 | 1.295997 | -0.10194 | 20.11113 | 2.17E-05 | 6E-05    |
| LOC114282663 | 1.23514  | 1.942655 | 1.70176  | 0.498947 | 0.505099 | 0.511967 | 1.563561 | 0.794329 | 52.62012 | 1.43E-10 | 6.9E-10  |
| LOC114282665 | 0.661971 | 0.496919 | 0.424279 | 0        | 0        | 0        | 7.902197 | -0.52425 | 95.40071 | 1.19E-15 | 8.98E-15 |
| LOC114282749 | 0.632909 | 0.574082 | 0.618136 | 0        | 0        | 0.024163 | 5.623577 | -0.63731 | 79.83351 | 5.08E-14 | 3.34E-13 |
| LOC114282806 | 1.367218 | 1.785802 | 1.892797 | 0        | 0        | 0        | 8.56671  | 0.066587 | 155.3864 | 4.57E-21 | 5.34E-20 |
| LOC114282836 | 0.537668 | 0.605413 | 0.493768 | 0.977385 | 1.045223 | 1.025736 | -1.00611 | 1.584939 | 48.36853 | 5.68E-10 | 2.6E-09  |
| LOC114282852 | 1.250115 | 1.07642  | 0.88877  | 0.133676 | 0.245587 | 0.303204 | 2.082062 | 1.320251 | 117.9348 | 2.49E-17 | 2.14E-16 |
| LOC114282858 | 1.589048 | 1.749795 | 1.835818 | 0.212397 | 0.234128 | 0.321175 | 2.613981 | 1.40586  | 191.1415 | 6.86E-24 | 1.02E-22 |
| LOC114282901 | 1.4609   | 1.228244 | 1.241317 | 0.354087 | 0.334556 | 0.481886 | 1.625125 | 0.503215 | 48.11353 | 6.18E-10 | 2.83E-09 |
| LOC114282925 | 0.956455 | 1.100127 | 1.661096 | 0.355211 | 0.279681 | 0.593669 | 1.460014 | 1.323607 | 26.36342 | 0.000332 | 0.000773 |
| LOC114283018 | 0.586615 | 0.556233 | 0.305308 | 1.122486 | 1.060569 | 0.975979 | -1.20701 | -0.31707 | 17.12413 | 7.92E-05 | 0.000202 |
| LOC114283026 | 3.302448 | 2.999224 | 3.122922 | 1.131762 | 1.061585 | 1.116119 | 1.407162 | 3.555469 | 352.7773 | 9.83E-33 | 2.84E-31 |



|              |          |          |          |          |          |          |          |          |          |          |          |
|--------------|----------|----------|----------|----------|----------|----------|----------|----------|----------|----------|----------|
| LOC114283041 | 0        | 0        | 0        | 13.67523 | 14.31645 | 16.31781 | -12.1969 | 3.446756 | 2579.632 | 3.56E-63 | 1.06E-60 |
| LOC114283118 | 1.441224 | 1.354828 | 1.394672 | 5.16767  | 5.412516 | 5.28824  | -2.02535 | 2.958071 | 451.7446 | 1.18E-36 | 4.67E-35 |
| LOC114283133 | 3.875606 | 4.012467 | 3.729576 | 1.702186 | 1.600847 | 1.876834 | 1.056136 | 2.706587 | 104.1441 | 1.19E-16 | 9.73E-16 |
| LOC114283134 | 0.524394 | 0.417647 | 0.519962 | 0.953255 | 1.080076 | 1.212932 | -1.26158 | 0.931909 | 47.45228 | 7.7E-10  | 3.48E-09 |
| LOC114283143 | 2.389696 | 3.183011 | 1.825153 | 0.95357  | 0.792521 | 1.241663 | 1.18683  | 0.913196 | 32.72104 | 2.45E-07 | 8.57E-07 |
| LOC114283176 | 0.107313 | 0.024167 | 0.070746 | 3.004168 | 2.949047 | 3.569281 | -5.56598 | 1.209704 | 436.5721 | 4.21E-36 | 1.6E-34  |
| LOC114283178 | 1.684036 | 1.412079 | 1.889689 | 0        | 0        | 0        | 8.169886 | -0.28911 | 118.4483 | 6.42E-18 | 5.81E-17 |
| LOC114283210 | 20.59072 | 20.06664 | 19.81243 | 37.6765  | 37.4639  | 37.91935 | -1.00798 | 5.872844 | 778.0587 | 8.61E-42 | 4.98E-40 |
| LOC114283223 | 0.935269 | 0.852519 | 1.037406 | 0.372414 | 0.433465 | 0.44072  | 1.06116  | 1.253218 | 39.25959 | 1.29E-08 | 5.16E-08 |
| LOC114283235 | 1.062399 | 0.797506 | 1.521029 | 2.399433 | 2.672574 | 2.345106 | -1.23713 | 0.797926 | 39.54794 | 1.16E-08 | 4.68E-08 |
| LOC114283260 | 82.17256 | 83.21359 | 82.57933 | 20.68419 | 20.49085 | 22.26575 | 1.861201 | 7.170158 | 3326.119 | 2.43E-72 | 1.31E-69 |
| LOC114283277 | 2.97668  | 2.598809 | 2.607002 | 5.646336 | 5.896774 | 4.89159  | -1.10414 | 2.542795 | 102.7302 | 1.66E-16 | 1.34E-15 |
| LOC114283234 | 1.628837 | 0.993453 | 1.416823 | 0.185058 | 0.097139 | 0.186556 | 2.986647 | -0.36197 | 57.81046 | 2.79E-11 | 1.44E-10 |
| LOC114283301 | 0.312264 | 0.293007 | 0.142957 | 1.182584 | 0.968372 | 1.394821 | -2.32486 | -0.20409 | 59.28446 | 1.78E-11 | 9.33E-11 |
| LOC114283348 | 7.190946 | 6.451887 | 7.299012 | 2.448379 | 2.287187 | 2.980658 | 1.327657 | 2.664426 | 149.6038 | 9.08E-21 | 1.04E-19 |
| LOC114283366 | 0.378897 | 0.577216 | 0.661199 | 1.05341  | 0.86132  | 1.409106 | -1.16243 | 0.223685 | 23.05518 | 6.31E-06 | 1.87E-05 |
| LOC114283369 | 4.90981  | 5.591737 | 5.332842 | 1.464816 | 1.448389 | 1.571109 | 1.707913 | 2.456738 | 200.0883 | 1.68E-24 | 2.61E-23 |
| LOC114283385 | 0.188727 | 0        | 0.138242 | 4.34559  | 4.412026 | 4.06373  | -5.23074 | 0.096158 | 189.2799 | 9.25E-24 | 1.36E-22 |
| LOC114283403 | 2.4681   | 2.226096 | 1.964675 | 0.663829 | 0.738956 | 0.519208 | 1.694204 | 1.807906 | 124.9683 | 1.2E-18  | 1.16E-17 |
| LOC114283413 | 1.153435 | 1.252381 | 1.176804 | 0.411859 | 0.324284 | 0.283086 | 1.722481 | 0.288325 | 45.12842 | 1.68E-09 | 7.34E-09 |
| LOC114283468 | 2.290987 | 2.316417 | 2.388774 | 0.21248  | 0.334599 | 0.321299 | 2.859091 | 0.847882 | 145.4537 | 1.99E-20 | 2.21E-19 |
| LOC114283469 | 2.340567 | 2.162743 | 2.087327 | 0.038159 | 0.075113 | 0.086553 | 4.857254 | 1.738164 | 458.8851 | 6.59E-37 | 2.64E-35 |
| LOC114283491 | 5.988065 | 5.926917 | 6.013372 | 0        | 0        | 0        | 11.16474 | 2.487946 | 975.6001 | 4.34E-49 | 4.2E-47  |
| LOC114283507 | 0.493992 | 0.513446 | 0.361846 | 0.115127 | 0.145035 | 0.13927  | 1.644791 | -0.31856 | 25.7663  | 2.09E-06 | 6.59E-06 |
| LOC114283538 | 1.226556 | 1.455753 | 1.420515 | 0.361566 | 0.521923 | 0.546739 | 1.372873 | -0.09464 | 22.84753 | 6.88E-06 | 2.03E-05 |
| LOC114283540 | 10.20306 | 9.493818 | 9.336103 | 3.041527 | 3.404367 | 3.471955 | 1.436418 | 3.569171 | 362.8027 | 3.61E-33 | 1.08E-31 |

|              |          |          |          |          |          |          |          |          |          |          |          |
|--------------|----------|----------|----------|----------|----------|----------|----------|----------|----------|----------|----------|
| LOC114283541 | 0.803148 | 0.817387 | 1.052154 | 1.628438 | 1.790628 | 1.783136 | -1.07356 | 1.391992 | 47.66297 | 7.18E-10 | 3.26E-09 |
| LOC114283576 | 12.34289 | 11.61629 | 12.20259 | 4.544842 | 4.331815 | 4.810704 | 1.294732 | 3.248058 | 242.7557 | 3.56E-27 | 6.75E-26 |
| LOC114283606 | 0.537139 | 0.508046 | 0.519356 | 0.078114 | 0.199889 | 0.088589 | 1.943032 | 0.013385 | 42.80097 | 3.72E-09 | 1.58E-08 |
| LOC114283617 | 1.443896 | 0.989632 | 1.483004 | 0        | 0.179708 | 0.086282 | 3.612999 | -0.34901 | 69.49094 | 8.97E-13 | 5.27E-12 |
| LOC114283696 | 0.167875 | 0.167216 | 0.141885 | 0.399063 | 0.388141 | 0.328342 | -1.31509 | 0.364461 | 34.23138 | 7.98E-08 | 2.95E-07 |
| LOC114283699 | 1.086299 | 1.223171 | 1.143831 | 0.411395 | 0.226743 | 0.171074 | 2.041007 | 0.989931 | 93.30563 | 1.6E-15  | 1.19E-14 |
| LOC114283713 | 5.351292 | 5.538039 | 6.393447 | 0.377774 | 0.421383 | 0.571248 | 3.519421 | 2.442892 | 537.87   | 1.62E-39 | 7.87E-38 |
| LOC114283723 | 12.86226 | 13.36307 | 13.61023 | 1.466352 | 1.154557 | 1.336472 | 3.234253 | 4.287229 | 1883.133 | 1.03E-61 | 2.64E-59 |
| LOC114283731 | 17.91946 | 18.11022 | 18.61159 | 1.45997  | 1.224176 | 1.376215 | 3.650068 | 4.786913 | 3130.082 | 3.39E-71 | 1.66E-68 |
| LOC114283727 | 1.194101 | 1.285236 | 0.945418 | 0.446901 | 0.402143 | 0.265484 | 1.534552 | 0.480621 | 41.40153 | 6.05E-09 | 2.51E-08 |
| LOC114283749 | 0.976155 | 0.979676 | 1.02591  | 3.973283 | 3.310668 | 3.704059 | -1.97749 | 1.751235 | 186.3048 | 1.5E-23  | 2.17E-22 |
| LOC114283756 | 2.171404 | 1.955997 | 2.416597 | 5.500649 | 5.313528 | 5.833977 | -1.45261 | 3.079582 | 271.8403 | 8.31E-29 | 1.8E-27  |
| LOC114283759 | 7.446281 | 7.649014 | 6.770105 | 12.90275 | 14.08575 | 14.30389 | -1.02684 | 3.884481 | 249.0504 | 1.53E-27 | 3E-26    |
| LOC114283767 | 1.318056 | 1.535305 | 1.473172 | 3.635296 | 3.838098 | 3.810472 | -1.49323 | 1.815781 | 118.7495 | 4.52E-18 | 4.14E-17 |
| LOC114283782 | 2.650295 | 2.534548 | 2.792319 | 1.02295  | 0.701509 | 0.648676 | 1.67309  | 1.55785  | 105.7654 | 8.2E-17  | 6.76E-16 |
| LOC114283816 | 0.346694 | 0.390377 | 0.24337  | 0.262595 | 0.068919 | 0.079416 | 1.248707 | -0.30343 | 14.10838 | 0.000353 | 0.000819 |
| LOC114283846 | 7.596162 | 7.830539 | 7.861759 | 3.266955 | 2.987692 | 3.091393 | 1.214313 | 4.861258 | 569.1779 | 1.84E-40 | 9.54E-39 |
| LOC114283847 | 0.741312 | 0.573469 | 0.702593 | 0.123442 | 0.089094 | 0.155551 | 2.340251 | 1.148928 | 132.8574 | 2.37E-19 | 2.42E-18 |
| LOC114283878 | 0.018033 | 0.020305 | 0        | 2.29468  | 2.684321 | 2.899826 | -7.4956  | 1.166097 | 482.3322 | 1.01E-37 | 4.32E-36 |
| LOC114283891 | 1.296388 | 1.374862 | 0.8447   | 0        | 0        | 0        | 8.91397  | 0.374454 | 186.5091 | 3.48E-21 | 4.13E-20 |
| LOC114283934 | 1.813475 | 2.265746 | 2.593032 | 5.419024 | 6.08013  | 6.179883 | -1.52348 | 2.326771 | 160.2795 | 1.28E-21 | 1.56E-20 |
| LOC114283951 | 0        | 0        | 0.050471 | 3.507083 | 2.827106 | 2.967266 | -7.11841 | 0.048973 | 213.6948 | 2.15E-25 | 3.61E-24 |
| LOC114283963 | 23.80776 | 20.63442 | 20.00857 | 8.153873 | 8.340624 | 8.746776 | 1.245633 | 3.549605 | 265.7574 | 2.11E-28 | 4.42E-27 |
| LOC114283976 | 0.9956   | 0.747362 | 0.966285 | 0.075409 | 0.059375 | 0.034209 | 3.916064 | 0.891402 | 203.2757 | 1.03E-24 | 1.62E-23 |
| LOC114284007 | 0.685251 | 0.435257 | 0.675692 | 0.03194  | 0.025149 | 0        | 4.782535 | -0.6371  | 70.78168 | 6.09E-13 | 3.64E-12 |
| LOC114284054 | 4.192361 | 4.527254 | 4.118964 | 0.546212 | 0.614385 | 0.589964 | 2.757159 | 2.368393 | 395.6403 | 1.57E-34 | 5.22E-33 |

|              |          |          |          |          |          |          |          |          |          |          |          |
|--------------|----------|----------|----------|----------|----------|----------|----------|----------|----------|----------|----------|
| LOC114284101 | 6.071121 | 6.523443 | 6.243513 | 2.254348 | 2.198878 | 2.849221 | 1.250108 | 2.832013 | 152.3925 | 5.39E-21 | 6.27E-20 |
| LOC114284079 | 1.336981 | 2.084452 | 2.711994 | 0.654336 | 0.662403 | 1.130798 | 1.170086 | -0.10206 | 15.56396 | 0.000168 | 0.000408 |
| LOC114284123 | 1.679125 | 1.41376  | 1.296434 | 0.439978 | 0.692848 | 0.602936 | 1.210099 | 1.090481 | 42.87205 | 3.63E-09 | 1.54E-08 |
| LOC114284208 | 0.374412 | 0.466757 | 0.374652 | 0.012154 | 0        | 0        | 6.422803 | 0.060184 | 144.5088 | 2.39E-20 | 2.63E-19 |
| LOC114284174 | 1.743423 | 1.717705 | 2.002643 | 0        | 0        | 0.054458 | 6.201429 | 0.603841 | 218.1094 | 1.12E-25 | 1.93E-24 |
| LOC114284217 | 2.829795 | 2.635191 | 2.285692 | 1.112229 | 1.072772 | 1.072177 | 1.148619 | 1.883366 | 68.37091 | 1.21E-12 | 7.02E-12 |
| LOC114284220 | 27.36201 | 26.8378  | 25.4684  | 60.82296 | 66.35355 | 63.8546  | -1.36832 | 4.77688  | 672.9365 | 2.68E-43 | 1.71E-41 |
| LOC114284231 | 4.193882 | 3.938601 | 4.166802 | 0.729931 | 0.766298 | 0.981118 | 2.190177 | 3.051782 | 477.2148 | 1.52E-37 | 6.4E-36  |
| LOC114284246 | 0.723369 | 0.837784 | 0.703962 | 0.262991 | 0.325396 | 0.142028 | 1.529035 | -0.27868 | 23.20059 | 5.94E-06 | 1.77E-05 |
| LOC114284254 | 3.25872  | 3.599586 | 3.214789 | 0.408051 | 0.46531  | 0.393622 | 2.878921 | 2.876758 | 603.2035 | 1.94E-41 | 1.09E-39 |
| LOC114284269 | 1.584457 | 1.565138 | 1.558905 | 0.104737 | 0.103083 | 0.06929  | 3.984683 | 1.830014 | 421.8053 | 1.5E-35  | 5.42E-34 |
| LOC114284328 | 0.554515 | 0.558658 | 0.400834 | 0.212212 | 0.146203 | 0.220615 | 1.281849 | -0.29547 | 17.04778 | 8.19E-05 | 0.000209 |
| LOC114284333 | 7.380225 | 7.521806 | 7.724347 | 2.333205 | 1.628328 | 1.683881 | 1.919572 | 2.297459 | 215.6146 | 1.62E-25 | 2.75E-24 |
| LOC114284353 | 0.042652 | 0.072039 | 0.14059  | 1.201767 | 1.251466 | 1.055171 | -3.84928 | -0.13499 | 123.7682 | 1.55E-18 | 1.47E-17 |
| LOC114284373 | 0.708217 | 0.514484 | 0.577335 | 2.86553  | 3.073694 | 2.794523 | -2.36919 | 1.241306 | 177.347  | 6.58E-23 | 9.02E-22 |
| LOC114284375 | 0.26461  | 0.081259 | 0.123344 | 3.454556 | 2.742955 | 2.722091 | -4.29652 | 2.58603  | 440.688  | 3.42E-13 | 2.09E-12 |
| LOC114284376 | 6.197668 | 6.275151 | 6.249693 | 18.85678 | 19.41194 | 18.68553 | -1.71076 | 4.557881 | 917.212  | 1.1E-48  | 1.02E-46 |
| LOC114284385 | 48.99914 | 50.57945 | 49.63839 | 17.20233 | 18.62374 | 18.55046 | 1.349019 | 6.054845 | 1380.37  | 5.13E-56 | 8.77E-54 |
| LOC114284389 | 0.32549  | 0.347211 | 0.282339 | 1.089941 | 0.612988 | 0.824071 | -1.47211 | 0.084794 | 32.98855 | 1.27E-07 | 4.59E-07 |
| LOC114284394 | 7.871995 | 8.45116  | 7.948942 | 2.404292 | 2.257986 | 2.540557 | 1.64429  | 3.305304 | 381.1503 | 6.1E-34  | 1.93E-32 |
| LOC114284402 | 52.19905 | 50.33689 | 54.132   | 20.07566 | 19.59299 | 19.42012 | 1.301788 | 5.600374 | 1060.964 | 2.85E-51 | 3.4E-49  |
| LOC114284426 | 1.065886 | 1.125174 | 1.244329 | 0.242199 | 0.254266 | 0.274679 | 2.025601 | 0.078553 | 50.00215 | 3.32E-10 | 1.56E-09 |
| LOC114284431 | 1.062463 | 1.207725 | 1.100666 | 2.943038 | 3.157253 | 3.44897  | -1.61571 | 2.707624 | 243.5871 | 3.18E-27 | 6.05E-26 |
| LOC114284441 | 2.101226 | 2.312203 | 2.859645 | 6.944824 | 7.8946   | 7.022907 | -1.69987 | 2.642507 | 242.7234 | 3.57E-27 | 6.78E-26 |
| LOC114284463 | 4.446814 | 4.152231 | 4.151028 | 0.591477 | 0.491581 | 0.670796 | 2.750262 | 2.034191 | 316.7188 | 4.41E-31 | 1.13E-29 |
| LOC114284481 | 1.059317 | 0.862478 | 1.110196 | 0.474006 | 0.256586 | 0.38078  | 1.367806 | 0.454297 | 33.70535 | 9.71E-08 | 3.56E-07 |

|              |          |          |          |          |          |          |          |          |          |          |          |
|--------------|----------|----------|----------|----------|----------|----------|----------|----------|----------|----------|----------|
| LOC114284516 | 3.354275 | 3.157741 | 3.564647 | 7.996686 | 5.981506 | 5.592599 | -1.0388  | 1.465395 | 45.39812 | 1.53E-09 | 6.73E-09 |
| LOC114284490 | 1.095026 | 1.05033  | 1.292273 | 11.57475 | 11.72574 | 11.37114 | -3.43351 | 2.268393 | 589.1051 | 4.85E-41 | 2.62E-39 |
| LOC114284548 | 2.743431 | 2.491207 | 3.257412 | 0.402183 | 0.759997 | 0.97305  | 1.824538 | 0.39248  | 51.80125 | 1.85E-10 | 8.89E-10 |
| LOC114284571 | 4.701679 | 4.881554 | 4.595666 | 1.942457 | 2.359686 | 2.140009 | 1.021414 | 1.795324 | 53.07359 | 1.23E-10 | 6.01E-10 |
| LOC114284585 | 0        | 0.053476 | 0.026091 | 2.071955 | 1.461451 | 1.892905 | -6.04349 | 0.234311 | 223.2943 | 5.31E-26 | 9.29E-25 |
| LOC114284604 | 3.242548 | 3.030915 | 3.191809 | 0.387575 | 0.495891 | 0.720375 | 2.420183 | 2.650079 | 378.5844 | 2.34E-33 | 7.06E-32 |
| LOC114284575 | 0.339381 | 0.442481 | 0.333641 | 0.779286 | 0.690281 | 0.859242 | -1.1686  | 0.031391 | 21.35942 | 1.28E-05 | 3.65E-05 |
| LOC114284577 | 0        | 0        | 0        | 3.282016 | 3.821629 | 4.543468 | -10.0041 | 1.228222 | 518.104  | 3.44E-38 | 1.52E-36 |
| LOC114284581 | 0.977783 | 0.65058  | 0.683665 | 3.312492 | 3.371504 | 2.565559 | -2.07306 | 0.426687 | 78.60225 | 7.06E-14 | 4.57E-13 |
| LOC114284611 | 1.104782 | 1.142432 | 0.990914 | 2.725545 | 2.484845 | 2.370582 | -1.32429 | 2.293829 | 126.1587 | 9.38E-19 | 9.12E-18 |
| LOC114284619 | 1.613408 | 2.096185 | 2.20908  | 0.090243 | 0.106581 | 0.170574 | 3.821886 | 0.472719 | 144.6068 | 2.34E-20 | 2.58E-19 |
| LOC114284624 | 6.216932 | 6.967127 | 5.764163 | 2.869881 | 2.989473 | 2.385466 | 1.099574 | 3.794622 | 186.0371 | 3.13E-15 | 2.28E-14 |
| LOC114284626 | 5.790742 | 5.867219 | 5.35792  | 2.269728 | 2.715841 | 2.459254 | 1.079312 | 3.639619 | 219.4144 | 9.29E-26 | 1.6E-24  |
| LOC114284668 | 8.457712 | 7.051453 | 7.083887 | 1.386235 | 1.422225 | 1.270413 | 2.367156 | 2.542599 | 348.8151 | 1.47E-32 | 4.19E-31 |
| LOC114284669 | 17.56024 | 17.44157 | 17.31826 | 3.461354 | 3.525656 | 3.364746 | 2.231837 | 4.358512 | 1194.264 | 2.15E-53 | 2.97E-51 |
| LOC114284647 | 0.157109 | 0.318428 | 0.207147 | 1.599337 | 1.574081 | 1.295583 | -2.7978  | -0.22721 | 77.94563 | 8.43E-14 | 5.42E-13 |
| LOC114284698 | 1.49706  | 1.175341 | 1.207253 | 0.549271 | 0.707691 | 0.453041 | 1.079462 | 1.094031 | 34.57965 | 7.02E-08 | 2.61E-07 |
| LOC114284696 | 1.616515 | 1.960206 | 1.867216 | 0.075347 | 0.177977 | 0.056968 | 3.924438 | -0.30191 | 81.95045 | 2.9E-14  | 1.94E-13 |
| LOC114284722 | 0.941672 | 0.70688  | 0.831115 | 0.336746 | 0.324063 | 0.346543 | 1.196608 | 1.799057 | 69.09527 | 9.83E-13 | 5.76E-12 |
| LOC114284765 | 3.693404 | 3.366619 | 3.594315 | 1.577245 | 1.443254 | 1.369772 | 1.181788 | 2.696011 | 127.3628 | 7.3E-19  | 7.16E-18 |
| LOC114284754 | 2.742564 | 2.73631  | 3.089657 | 0.063107 | 0.099377 | 0.190855 | 4.374309 | 0.495561 | 169.8375 | 2.37E-22 | 3.08E-21 |
| LOC114284797 | 6.142425 | 5.362682 | 5.20842  | 0        | 0        | 0        | 10.5991  | 1.9428   | 654.4445 | 2.83E-42 | 1.67E-40 |
| LOC114284842 | 4.451792 | 5.063087 | 5.456704 | 10.00387 | 11.23872 | 9.68513  | -1.15765 | 3.387206 | 218.0453 | 5.54E-25 | 8.96E-24 |
| LOC114284828 | 61.54537 | 61.40345 | 63.97045 | 2.390282 | 2.143421 | 2.309226 | 4.667178 | 4.699254 | 3801.515 | 7.31E-75 | 5.28E-72 |
| LOC114284830 | 24.16721 | 23.93825 | 26.92693 | 5.079599 | 5.891164 | 4.826614 | 2.138143 | 3.581722 | 686.4665 | 1.22E-43 | 7.96E-42 |
| LOC114284850 | 48.73335 | 44.95817 | 50.40674 | 3.045352 | 2.643737 | 2.656729 | 4.011993 | 5.117607 | 4670.997 | 9.13E-79 | 8.54E-76 |

|              |          |          |          |          |          |          |          |          |          |          |          |
|--------------|----------|----------|----------|----------|----------|----------|----------|----------|----------|----------|----------|
| LOC114284852 | 10.02472 | 9.796133 | 10.66698 | 3.666197 | 4.046957 | 3.967623 | 1.271662 | 3.417285 | 268.2934 | 1.29E-28 | 2.74E-27 |
| LOC114284856 | 1.038307 | 1.126772 | 1.173899 | 0.314576 | 0.53845  | 0.268864 | 1.451945 | 1.614965 | 79.02504 | 1.88E-13 | 1.17E-12 |
| LOC114284861 | 0.010859 | 0.012227 | 0        | 0.552708 | 0.621691 | 0.835771 | -6.26721 | -0.04867 | 188.1483 | 1.11E-23 | 1.63E-22 |
| LOC114284863 | 0.826241 | 0.547262 | 0.694219 | 1.281082 | 1.460848 | 1.770177 | -1.2337  | 0.503907 | 33.03398 | 1.25E-07 | 4.52E-07 |
| LOC114284897 | 2.545658 | 2.966396 | 2.406739 | 8.501781 | 9.278416 | 9.886008 | -1.91741 | 2.622437 | 304.1038 | 1.81E-30 | 4.43E-29 |
| LOC114284922 | 0.175834 | 0.074246 | 0.241495 | 2.876707 | 2.233564 | 2.295824 | -3.96532 | 0.868052 | 254.8925 | 7.13E-28 | 1.43E-26 |
| LOC114284953 | 0.845583 | 0.721306 | 0.732    | 1.630277 | 1.503675 | 1.65521  | -1.15412 | 0.528861 | 30.5192  | 3.24E-07 | 1.12E-06 |
| LOC114284998 | 1.019903 | 0.835206 | 1.12061  | 5.983367 | 6.104527 | 7.072486 | -2.78739 | 1.290862 | 234.4373 | 1.11E-26 | 2.04E-25 |
| LOC114285001 | 1.027828 | 0.789709 | 1.22232  | 4.70399  | 4.326827 | 5.50101  | -2.36161 | 2.896514 | 479.6691 | 1.19E-33 | 3.68E-32 |
| LOC114285028 | 3.984866 | 3.745305 | 4.63163  | 1.01772  | 0.5185   | 1.086307 | 2.136567 | 1.250051 | 121.976  | 2.26E-18 | 2.13E-17 |
| LOC114285031 | 0.011002 | 0.024776 | 0.024176 | 1.01995  | 0.818821 | 0.982842 | -5.55635 | 0.412533 | 253.6432 | 8.39E-28 | 1.67E-26 |
| LOC114285030 | 0.169289 | 0.09531  | 0.062002 | 9.745025 | 9.449789 | 9.888523 | -6.49809 | 2.420804 | 1075.154 | 1.65E-51 | 2E-49    |
| LOC114285039 | 1.336981 | 1.435956 | 1.084797 | 0.037391 | 0.02944  | 0        | 5.647416 | 0.11041  | 143.3268 | 3E-20    | 3.27E-19 |
| LOC114285026 | 1.522781 | 1.582752 | 1.447912 | 0.266168 | 0.209571 | 0.160993 | 2.738769 | -0.00065 | 71.55022 | 4.91E-13 | 2.96E-12 |
| LOC114285056 | 4.384287 | 4.27949  | 4.414523 | 12.48528 | 10.7436  | 11.90228 | -1.52694 | 4.180668 | 597.342  | 2.83E-41 | 1.56E-39 |
| LOC114285101 | 3.970391 | 3.703301 | 3.906657 | 1.184956 | 0.932995 | 1.018079 | 1.78979  | 1.369466 | 107.4358 | 5.59E-17 | 4.67E-16 |
| LOC114285120 | 0.264062 | 0.080051 | 0.178545 | 0.627714 | 0.610533 | 0.586265 | -1.86855 | 0.266788 | 55.54628 | 7.14E-11 | 3.54E-10 |
| LOC114285162 | 3.165358 | 2.81913  | 3.065277 | 0.097526 | 0.179174 | 0.073737 | 4.54537  | 1.453919 | 355.7066 | 7.32E-33 | 2.13E-31 |
| LOC114285189 | 1.311391 | 1.059317 | 1.34691  | 0.414587 | 0.652864 | 0.587731 | 1.032631 | 0.059414 | 15.40265 | 0.000171 | 0.000415 |
| LOC114285233 | 0.616367 | 0.597635 | 0.771287 | 0.217864 | 0.196045 | 0.235315 | 1.492778 | -0.20112 | 24.29634 | 3.79E-06 | 1.16E-05 |
| LOC114285208 | 1.208793 | 1.361098 | 1.42302  | 0        | 0        | 0        | 8.160124 | -0.29462 | 118.5528 | 6.28E-18 | 5.69E-17 |
| LOC114285255 | 2.380292 | 1.710768 | 2.949198 | 4.326946 | 4.856634 | 3.967531 | -1.00171 | 1.043544 | 31.34124 | 2.37E-07 | 8.28E-07 |
| LOC114285275 | 1.745806 | 1.503239 | 1.579686 | 4.933691 | 4.766537 | 5.141647 | -1.72124 | 2.777616 | 293.7044 | 5.99E-30 | 1.41E-28 |
| LOC114285277 | 1.996797 | 2.13159  | 1.96602  | 0.282843 | 0.742337 | 0.427698 | 1.912955 | 0.649389 | 66.91855 | 1.84E-12 | 1.05E-11 |
| LOC114285292 | 1.008284 | 0.967694 | 1.033492 | 1.894387 | 1.937112 | 2.027525 | -1.06847 | 2.74129  | 118.9918 | 4.29E-18 | 3.94E-17 |
| LOC114285320 | 0.641497 | 0.893401 | 1.16855  | 0.460313 | 0.265786 | 0.371231 | 1.204914 | 0.286366 | 22.17567 | 9.73E-06 | 2.82E-05 |

|              |          |          |          |          |          |          |          |          |          |          |          |
|--------------|----------|----------|----------|----------|----------|----------|----------|----------|----------|----------|----------|
| LOC114285349 | 0.964272 | 1.013383 | 1.024169 | 0.029215 | 0        | 0.044176 | 5.118421 | 0.112311 | 138.0454 | 8.41E-20 | 8.89E-19 |
| LOC114285352 | 2010.4   | 1983.355 | 1958.015 | 883.1577 | 868.0799 | 885.6537 | 1.069244 | 11.11739 | 4953.578 | 6.45E-17 | 5.36E-16 |
| LOC114285375 | 0.179901 | 0.371376 | 0.461219 | 0.926581 | 1.287457 | 1.40112  | -1.97379 | -0.27907 | 42.08092 | 4.78E-09 | 2E-08    |
| LOC114285411 | 0.477428 | 0.462571 | 0.439175 | 0        | 0        | 0.03052  | 5.056421 | -0.4056  | 89.31062 | 4.34E-15 | 3.13E-14 |
| LOC114285413 | 15.04282 | 14.60312 | 14.53007 | 33.14476 | 32.58138 | 32.93066 | -1.26404 | 5.511952 | 1012.175 | 1.97E-50 | 2.13E-48 |
| LOC114285416 | 4.073419 | 3.39855  | 4.259943 | 1.516635 | 1.7561   | 2.023557 | 1.026199 | 1.832778 | 53.24524 | 1.17E-10 | 5.71E-10 |
| LOC114285428 | 0.261514 | 0.200771 | 0.313457 | 1.469371 | 1.190961 | 1.192635 | -2.39284 | 0.993016 | 148.2058 | 1.18E-20 | 1.33E-19 |
| LOC114285433 | 0.918387 | 0.663386 | 0.875797 | 0.220495 | 0.297618 | 0.381051 | 1.311231 | 0.101615 | 24.16641 | 4E-06    | 1.22E-05 |
| LOC114285442 | 1.546629 | 1.422226 | 1.132897 | 9.090502 | 9.924652 | 9.423877 | -2.89358 | 2.696458 | 617.3076 | 7.88E-42 | 4.57E-40 |
| LOC114285506 | 0.314943 | 0.301097 | 0.332983 | 0.615718 | 0.995107 | 0.816712 | -1.47856 | 1.549487 | 90.72544 | 4.79E-15 | 3.44E-14 |
| LOC114285507 | 2.580845 | 2.554748 | 3.03823  | 0.10311  | 0.162371 | 0.058469 | 4.527649 | 1.631755 | 392.1942 | 2.16E-34 | 7.11E-33 |
| LOC114285556 | 2.218114 | 2.331085 | 2.166342 | 0.597353 | 0.540886 | 0.474223 | 1.960663 | 1.398428 | 126.3215 | 9.07E-19 | 8.83E-18 |
| LOC114285560 | 3.216218 | 3.342881 | 4.023087 | 17.89932 | 16.50122 | 19.04159 | -2.44277 | 2.729031 | 495.4374 | 3.69E-38 | 1.63E-36 |
| LOC114285540 | 2.674893 | 1.721099 | 2.399197 | 0.595405 | 1.093872 | 0.75028  | 1.346265 | -0.07445 | 21.71974 | 1.1E-05  | 3.16E-05 |
| LOC114285568 | 1.332646 | 1.376982 | 1.188614 | 0.0285   | 0.08976  | 0.086192 | 4.037211 | 0.519908 | 161.0392 | 1.11E-21 | 1.37E-20 |
| LOC114285587 | 0.74063  | 0.719485 | 0.797805 | 0.21119  | 0.187069 | 0.219552 | 1.754316 | 0.132257 | 41.70324 | 5.45E-09 | 2.27E-08 |
| LOC114285688 | 1.160124 | 1.457024 | 1.029547 | 0.135186 | 0.085153 | 0.061326 | 3.608635 | 0.526874 | 140.2219 | 5.48E-20 | 5.87E-19 |
| LOC114285689 | 756.149  | 767.9949 | 771.8034 | 335.3938 | 329.7452 | 327.8456 | 1.103912 | 8.441922 | 1815.603 | 6.58E-23 | 9.02E-22 |
| LOC114285695 | 4.15407  | 3.860771 | 4.491801 | 0.958902 | 2.265023 | 2.174991 | 1.05171  | 0.548695 | 22.14487 | 9.21E-06 | 2.67E-05 |
| LOC114285734 | 0.952173 | 0.832489 | 0.812338 | 0.06109  | 0.160334 | 0.061584 | 3.043823 | 0.492622 | 114.9344 | 1.04E-17 | 9.23E-17 |
| LOC114285747 | 2.007066 | 1.640787 | 1.782323 | 15.39362 | 14.44219 | 12.92344 | -3.06766 | 3.170894 | 960.6704 | 1.67E-49 | 1.67E-47 |
| LOC114285762 | 1.858615 | 1.864868 | 1.779289 | 9.483582 | 9.903394 | 9.370643 | -2.4907  | 4.258795 | 1474.824 | 3.19E-57 | 6.15E-55 |
| LOC114285764 | 2.06328  | 1.746939 | 2.249438 | 5.2335   | 6.020775 | 5.297837 | -1.55669 | 3.853267 | 484.4368 | 5.05E-32 | 1.39E-30 |
| LOC114285790 | 1.079977 | 1.454494 | 1.00048  | 0.384942 | 0.575872 | 0.436565 | 1.2059   | 0.340755 | 24.33983 | 3.73E-06 | 1.14E-05 |
| LOC114285822 | 1.00445  | 1.367731 | 1.257626 | 2.293003 | 2.106339 | 2.857346 | -1.11788 | 1.26401  | 45.72251 | 1.37E-09 | 6.06E-09 |
| LOC114285843 | 0.638421 | 0.718861 | 1.010103 | 1.810436 | 1.279274 | 1.649599 | -1.09692 | 0.532748 | 26.28056 | 1.7E-06  | 5.43E-06 |

|              |          |          |          |          |          |          |          |          |          |          |          |
|--------------|----------|----------|----------|----------|----------|----------|----------|----------|----------|----------|----------|
| LOC114285871 | 9.894957 | 10.35063 | 9.848974 | 20.72613 | 19.97782 | 20.9404  | -1.1395  | 5.785628 | 920.4427 | 9.54E-49 | 8.94E-47 |
| LOC114285875 | 0.151635 | 0.117752 | 0.120647 | 0.674855 | 0.598713 | 0.704271 | -2.43136 | 1.213647 | 181.2473 | 3.43E-23 | 4.83E-22 |
| LOC114285885 | 26.21421 | 25.42959 | 27.81432 | 10.04445 | 9.931811 | 8.653977 | 1.371726 | 4.067143 | 428.8278 | 8.18E-36 | 3.01E-34 |
| LOC114285901 | 7.484175 | 7.845503 | 7.648836 | 3.26428  | 3.203929 | 3.12729  | 1.155342 | 4.720339 | 454.0009 | 9.82E-37 | 3.91E-35 |
| LOC114285937 | 0.37376  | 0.349387 | 0.178213 | 0.038458 | 0.010094 | 0        | 4.199189 | -0.33784 | 70.6369  | 1.07E-11 | 5.72E-11 |
| LOC114285950 | 0.663634 | 0.785246 | 0.729163 | 0.020447 | 0.032198 | 0        | 5.167689 | 0.157872 | 142.1301 | 3.78E-20 | 4.1E-19  |
| LOC114286011 | 1.265923 | 1.018162 | 1.142543 | 0.287653 | 0.582398 | 0.248555 | 1.488674 | 0.152352 | 30.34209 | 3.47E-07 | 1.19E-06 |
| LOC114286067 | 3.655246 | 2.384152 | 3.134572 | 0.405158 | 0.44661  | 0.643287 | 2.486225 | 1.323959 | 155.6901 | 1.3E-20  | 1.46E-19 |
| LOC114286096 | 2.206405 | 1.83123  | 2.048679 | 0.979175 | 1.008191 | 0.839984 | 1.007355 | 2.133409 | 62.68763 | 6.37E-12 | 3.48E-11 |
| LOC114286101 | 2.414346 | 1.89266  | 2.249795 | 0.999991 | 0.78736  | 0.882074 | 1.204153 | 0.685712 | 32.71109 | 1.41E-07 | 5.07E-07 |
| LOC114286125 | 2.061446 | 1.661239 | 1.931909 | 0.477602 | 0.809949 | 0.694424 | 1.377866 | 0.996985 | 51.01946 | 2.39E-10 | 1.13E-09 |
| LOC114286132 | 0.154201 | 0.159161 | 0.141189 | 0.350388 | 0.294276 | 0.317901 | -1.17335 | 0.212071 | 24.86771 | 3.01E-06 | 9.28E-06 |
| LOC114286183 | 1.259402 | 1.487258 | 1.181256 | 0.335029 | 0.395686 | 0.886569 | 1.114294 | 0.006601 | 16.02553 | 0.00013  | 0.000322 |
| LOC114286227 | 5.691391 | 5.439768 | 5.598946 | 0.80201  | 0.726197 | 0.606376 | 2.875367 | 2.122329 | 357.2219 | 6.29E-33 | 1.83E-31 |
| LOC114286196 | 2.38344  | 2.420165 | 2.548639 | 0.580268 | 0.731014 | 0.81895  | 1.654915 | 1.222222 | 84.46316 | 1.5E-14  | 1.03E-13 |
| LOC114286251 | 28.71803 | 29.62698 | 27.73477 | 13.92304 | 12.29064 | 13.50974 | 1.012927 | 5.314368 | 542.1537 | 2.16E-39 | 1.04E-37 |
| LOC114286279 | 0.534914 | 0.56885  | 0.750991 | 1.134441 | 1.233495 | 1.552059 | -1.20028 | 0.046217 | 22.58956 | 7.65E-06 | 2.25E-05 |
| LOC114286312 | 1.279801 | 0.982536 | 0.958753 | 0.070498 | 0.249787 | 0        | 3.182202 | 0.047934 | 70.17301 | 5.13E-11 | 2.58E-10 |
| LOC114286317 | 16.91802 | 15.50846 | 16.57897 | 7.76451  | 7.246829 | 7.525903 | 1.017032 | 4.996709 | 462.0606 | 5.09E-37 | 2.06E-35 |
| LOC114286328 | 0.542231 | 0.662671 | 0.682958 | 0.192328 | 0.170361 | 0.227208 | 1.557341 | 0.98293  | 62.73195 | 6.29E-12 | 3.43E-11 |
| LOC114286364 | 4.32548  | 3.833465 | 4.036287 | 0.978166 | 1.214507 | 1.009786 | 1.816449 | 2.902826 | 310.3217 | 8.97E-31 | 2.26E-29 |
| LOC114286415 | 0.484072 | 0.372111 | 0.419359 | 0.093072 | 0.053296 | 0.025589 | 2.854254 | 0.739034 | 123.5464 | 2.11E-18 | 1.99E-17 |
| LOC114286422 | 7.959205 | 8.090253 | 7.520115 | 20.60482 | 20.87784 | 20.21824 | -1.49304 | 3.814001 | 511.6252 | 1.09E-38 | 4.99E-37 |
| LOC114286429 | 0.36112  | 0.496981 | 0.506994 | 2.443461 | 3.158641 | 2.922795 | -2.76193 | 1.339481 | 233.0506 | 1.34E-26 | 2.46E-25 |
| LOC114286431 | 0        | 0.024534 | 0        | 1.821949 | 1.746399 | 1.61709  | -7.358   | 0.281691 | 256.9357 | 5.47E-28 | 1.11E-26 |
| LOC114286466 | 3.62913  | 3.822754 | 3.601592 | 0.042562 | 0        | 0.06436  | 6.454761 | 1.321828 | 387.4805 | 3.36E-34 | 1.09E-32 |

|              |          |          |          |          |          |          |          |          |          |          |          |
|--------------|----------|----------|----------|----------|----------|----------|----------|----------|----------|----------|----------|
| LOC114286436 | 2.58786  | 2.824541 | 2.825946 | 7.243995 | 6.658079 | 7.004406 | -1.44771 | 3.228355 | 313.1969 | 6.51E-31 | 1.66E-29 |
| LOC114286410 | 0.117023 | 0.065884 | 0.160723 | 1.648637 | 1.465576 | 1.045439 | -3.62141 | -0.33106 | 98.59308 | 4.43E-16 | 3.45E-15 |
| LOC114286484 | 2.018511 | 1.866975 | 1.861387 | 0        | 0        | 0        | 8.366106 | -0.11641 | 138.3026 | 1.12E-19 | 1.18E-18 |
| LOC114286518 | 61.17365 | 53.32753 | 59.24446 | 113.2387 | 112.0612 | 116.0366 | -1.07935 | 5.61821  | 734.5386 | 8.35E-45 | 5.85E-43 |
| LOC114286559 | 18.85002 | 16.85302 | 16.68208 | 7.691747 | 7.979964 | 7.275072 | 1.086665 | 4.499855 | 338.7141 | 4.17E-32 | 1.15E-30 |
| LOC114286568 | 6.017738 | 6.254732 | 5.676753 | 0.922908 | 0.983137 | 1.046674 | 2.488157 | 2.813771 | 480.2021 | 1.2E-37  | 5.08E-36 |
| LOC114286583 | 0.358022 | 0.403132 | 0.487034 | 0.123966 | 0.097606 | 0.082011 | 1.942787 | 0.021204 | 43.72509 | 2.71E-09 | 1.16E-08 |
| LOC114286624 | 0.853895 | 0.80967  | 0.617243 | 1.919861 | 1.543796 | 1.698621 | -1.26466 | 0.77645  | 42.19111 | 4.6E-09  | 1.93E-08 |
| LOC114286626 | 1.595132 | 1.045012 | 1.210913 | 0.316327 | 0.45662  | 0.518192 | 1.441362 | -0.01056 | 25.89362 | 1.99E-06 | 6.28E-06 |
| LOC114286642 | 1.725521 | 1.279492 | 1.942143 | 0        | 0        | 0.057843 | 5.803685 | -0.48573 | 89.76131 | 3.88E-15 | 2.81E-14 |
| LOC114286672 | 1.029561 | 1.088595 | 1.062245 | 5.295139 | 6.002232 | 5.832677 | -2.53986 | 3.054186 | 692.0857 | 8.85E-44 | 5.83E-42 |
| LOC114286675 | 0.225719 | 0.153833 | 0.248007 | 0.475104 | 0.442095 | 0.432687 | -1.19561 | 0.785748 | 37.97419 | 2.04E-08 | 8.02E-08 |
| LOC114286679 | 0.371625 | 0.286936 | 0.279991 | 3.377741 | 3.161029 | 3.385619 | -3.49108 | 2.391371 | 642.3568 | 1.66E-42 | 1E-40    |
| LOC114286697 | 1.387967 | 1.603975 | 1.605281 | 0.066397 | 0.261393 | 0.301203 | 2.650197 | -0.27019 | 53.95436 | 9.32E-11 | 4.59E-10 |
| LOC114286699 | 2.32133  | 2.564495 | 2.358048 | 0.716564 | 0.376132 | 0.78256  | 1.841352 | 0.198096 | 46.062   | 1.23E-09 | 5.43E-09 |
| LOC114286705 | 11.18636 | 10.72169 | 10.4409  | 4.432845 | 4.26589  | 4.122926 | 1.233859 | 3.546291 | 276.4548 | 4.71E-29 | 1.04E-27 |
| LOC114286711 | 0.883223 | 0.672755 | 0.970434 | 0.330553 | 0.334628 | 0.321327 | 1.245747 | -0.37123 | 15.47698 | 0.000165 | 0.000402 |
| LOC114286750 | 8.26919  | 9.153274 | 7.391759 | 0.934187 | 0.802415 | 0.70631  | 3.245322 | 1.594992 | 282.4132 | 2.28E-29 | 5.17E-28 |
| LOC114286735 | 4.063394 | 4.228067 | 4.729846 | 1.68208  | 1.535552 | 1.91687  | 1.23086  | 2.771609 | 141.2708 | 4.47E-20 | 4.82E-19 |
| LOC114286870 | 0.375907 | 0.388951 | 0.200931 | 0.073874 | 0.029083 | 0.055854 | 2.510438 | -0.59944 | 36.80688 | 3.1E-08  | 1.2E-07  |
| LOC114286906 | 14.48976 | 15.92465 | 15.34851 | 0.031545 | 0.037256 | 0.011925 | 9.002228 | 4.691047 | 4866.773 | 1.52E-79 | 1.66E-76 |
| LOC114286907 | 19.73154 | 18.28128 | 20.26596 | 0.038987 | 0.030697 | 0.088432 | 8.295678 | 3.746597 | 2613.274 | 8.26E-68 | 3.41E-65 |
| LOC114286908 | 5.45245  | 4.539272 | 5.417244 | 0        | 0        | 0        | 10.0997  | 1.469112 | 469.7787 | 7.54E-37 | 3.01E-35 |
| LOC114286940 | 0.016201 | 0        | 0        | 0.647904 | 0.695642 | 0.73479  | -6.48242 | -0.56571 | 132.7828 | 2.41E-19 | 2.45E-18 |
| LOC114286947 | 2.05673  | 2.127372 | 1.918215 | 0        | 0.03423  | 0        | 6.914885 | 0.497215 | 213.5006 | 2.21E-25 | 3.71E-24 |
| LOC114286948 | 60.4777  | 59.93552 | 69.69081 | 5.592648 | 6.092462 | 6.719151 | 3.251858 | 4.603756 | 2163.869 | 1.51E-60 | 3.59E-58 |



|              |          |          |          |          |          |          |          |          |          |          |          |
|--------------|----------|----------|----------|----------|----------|----------|----------|----------|----------|----------|----------|
| LOC114287003 | 56.40912 | 52.06239 | 54.89333 | 104.9142 | 102.605  | 105.3324 | -1.04281 | 6.978697 | 1100.779 | 1.43E-30 | 3.54E-29 |
| LOC114287094 | 3.881139 | 3.646924 | 3.588677 | 1.117904 | 1.31052  | 1.108169 | 1.54226  | 2.442054 | 167.0776 | 3.83E-22 | 4.89E-21 |
| LOC114287042 | 0.21341  | 0.192239 | 0.468965 | 2.870765 | 2.810157 | 3.05043  | -3.40504 | 0.211434 | 139.292  | 6.58E-20 | 7.01E-19 |
| LOC114287060 | 11.57241 | 11.7344  | 12.56829 | 1.942987 | 2.500705 | 2.457807 | 2.25741  | 4.363328 | 1111.767 | 3.29E-50 | 3.48E-48 |
| LOC114287069 | 6.203953 | 5.908904 | 7.329065 | 13.01597 | 11.91745 | 11.63608 | -1.01205 | 3.611115 | 197.9164 | 3.63E-24 | 5.49E-23 |
| LOC114287098 | 0.635543 | 0.937708 | 0.818693 | 0        | 0        | 0        | 7.809466 | -0.59525 | 89.95203 | 4.53E-15 | 3.26E-14 |
| LOC114287081 | 5.502049 | 5.65363  | 5.830606 | 2.104192 | 1.979517 | 2.231414 | 1.320049 | 3.950534 | 396.6331 | 1.44E-34 | 4.79E-33 |
| LOC114287107 | 7.414424 | 7.076241 | 7.449507 | 3.13528  | 3.404985 | 3.078912 | 1.082183 | 3.002955 | 139.6035 | 6.19E-20 | 6.6E-19  |
| LOC114287117 | 1.024484 | 0.999758 | 1.335763 | 0.347635 | 0.332369 | 0.394254 | 1.52671  | 0.78796  | 52.60175 | 1.43E-10 | 6.94E-10 |
| LOC114287133 | 7.315199 | 7.138645 | 7.135057 | 15.44403 | 13.40918 | 15.0281  | -1.12407 | 3.699098 | 272.5759 | 7.58E-29 | 1.65E-27 |
| LOC114287155 | 2.158101 | 1.305009 | 1.932086 | 2.978607 | 4.118496 | 3.130877 | -1.02617 | 1.019396 | 31.84043 | 2.06E-07 | 7.25E-07 |
| LOC114287164 | 2.775453 | 2.635498 | 2.894923 | 1.488008 | 1.098382 | 1.23051  | 1.031447 | 2.268043 | 71.49883 | 4.98E-13 | 3E-12    |
| LOC114287165 | 2.299342 | 2.21919  | 2.592867 | 1.037092 | 0.86606  | 0.855397 | 1.271663 | 2.53004  | 123.7182 | 1.57E-18 | 1.49E-17 |
| LOC114287203 | 24.96984 | 23.1088  | 22.72622 | 8.190004 | 8.102542 | 8.162464 | 1.428733 | 5.013304 | 874.7403 | 7.53E-48 | 6.55E-46 |
| LOC114287175 | 0.843288 | 0.601376 | 0.741245 | 1.788438 | 1.408156 | 1.390818 | -1.14401 | 0.332175 | 25.36207 | 2.46E-06 | 7.68E-06 |
| LOC114287235 | 0.643285 | 0.795351 | 0.734522 | 0.275148 | 0.252749 | 0.312046 | 1.25096  | 0.372408 | 27.73413 | 9.57E-07 | 3.13E-06 |
| LOC114287226 | 0.76223  | 0.915487 | 0.94916  | 4.34154  | 5.454866 | 3.911072 | -2.48692 | 0.725857 | 129.8602 | 4.36E-19 | 4.35E-18 |
| LOC114287291 | 1.071413 | 1.072363 | 1.226256 | 0.270505 | 0.340779 | 0.449946 | 1.524819 | 0.674422 | 48.84395 | 4.86E-10 | 2.24E-09 |
| LOC114287340 | 4.792805 | 3.693478 | 4.033574 | 0.865067 | 0.53517  | 0.747487 | 2.457948 | 2.134992 | 269.9783 | 2.06E-28 | 4.32E-27 |
| LOC114287335 | 0.503273 | 0.63752  | 0.794891 | 0.914861 | 1.665765 | 1.210473 | -1.1053  | -0.03555 | 17.44402 | 6.88E-05 | 0.000177 |
| LOC114287360 | 0.495568 | 0.541351 | 0.568882 | 1.223548 | 1.069247 | 1.138569 | -1.19636 | 1.801438 | 77.49867 | 9.51E-14 | 6.09E-13 |
| LOC114287380 | 0.843085 | 1.071804 | 0.926333 | 0.346066 | 0.311407 | 0.560679 | 1.080084 | -0.24666 | 13.00947 | 0.000511 | 0.001155 |
| LOC114287382 | 1.021718 | 1.053231 | 0.838    | 0.026159 | 0        | 0.019778 | 5.758067 | 0.207402 | 157.2764 | 2.2E-21  | 2.64E-20 |
| LOC114287389 | 2.578204 | 2.377613 | 3.076323 | 0.911895 | 1.185527 | 1.394946 | 1.071244 | 2.328181 | 74.19481 | 4.4E-13  | 2.66E-12 |
| LOC114287402 | 3.331928 | 3.192273 | 3.532475 | 7.703888 | 7.739102 | 7.833186 | -1.31582 | 2.542657 | 150.0421 | 8.36E-21 | 9.56E-20 |
| LOC114287406 | 67.92304 | 66.92105 | 69.23755 | 18.28884 | 16.9288  | 18.68417 | 1.815828 | 5.696932 | 2046.03  | 3E-63    | 9.08E-61 |

|              |          |          |          |          |          |          |          |          |          |          |          |
|--------------|----------|----------|----------|----------|----------|----------|----------|----------|----------|----------|----------|
| LOC114287407 | 2.307312 | 2.234304 | 2.585842 | 4.949251 | 4.425264 | 4.820176 | -1.09404 | 1.249797 | 45.62758 | 1.42E-09 | 6.24E-09 |
| LOC114287435 | 5.254805 | 5.214894 | 5.871533 | 10.30785 | 10.58061 | 10.28246 | -1.03831 | 3.028058 | 140.3659 | 5.33E-20 | 5.71E-19 |
| LOC114287418 | 0.677643 | 0.957839 | 0.712872 | 0.104837 | 0.247635 | 0.217976 | 1.867969 | 0.167179 | 44.42796 | 2.13E-09 | 9.23E-09 |
| LOC114287452 | 1.013581 | 0.966498 | 0.872872 | 1.801011 | 1.921237 | 1.945272 | -1.09735 | 3.250154 | 187.0031 | 1.34E-23 | 1.95E-22 |
| LOC114287453 | 0.770061 | 0.928396 | 0.965748 | 3.591491 | 3.195213 | 3.27133  | -2.02066 | 3.06536  | 469.668  | 2.76E-37 | 1.14E-35 |
| LOC114287458 | 0.675196 | 0.785897 | 0.808551 | 0.372353 | 0.228028 | 0.375367 | 1.117233 | 1.159026 | 38.5354  | 1.67E-08 | 6.61E-08 |
| LOC114287506 | 4.848106 | 4.941297 | 5.005371 | 0        | 0.119639 | 0        | 6.561368 | 0.933089 | 287.3354 | 1.27E-29 | 2.92E-28 |
| LOC114287507 | 1.946421 | 1.13642  | 2.455446 | 8.321432 | 9.389504 | 7.728244 | -2.29696 | 2.138211 | 243.6501 | 4E-21    | 4.72E-20 |
| LOC114287509 | 4.745046 | 3.580301 | 4.407356 | 0        | 0        | 0.067233 | 6.948702 | 0.52367  | 215.065  | 1.75E-25 | 2.97E-24 |
| LOC114287492 | 1.128854 | 1.011681 | 1.417507 | 1.800783 | 3.132517 | 2.944677 | -1.28001 | 1.359297 | 57.80435 | 9.52E-11 | 4.69E-10 |
| LOC114287515 | 27.69023 | 26.54303 | 27.67362 | 12.14532 | 12.58492 | 12.22979 | 1.041608 | 5.292555 | 606.1259 | 1.61E-41 | 9.09E-40 |
| LOC114287533 | 1.495989 | 1.68448  | 1.379538 | 0.631299 | 0.61177  | 0.44059  | 1.341055 | 0.343448 | 30.38627 | 3.41E-07 | 1.17E-06 |
| LOC114287547 | 10.32684 | 10.21696 | 10.18638 | 19.02546 | 19.43083 | 19.28044 | -1.01556 | 5.276744 | 597.9794 | 2.72E-41 | 1.5E-39  |
| LOC114287568 | 3.514109 | 3.462269 | 3.668044 | 1.277605 | 0.8802   | 1.207448 | 1.557208 | -0.15481 | 27.23919 | 1.16E-06 | 3.77E-06 |
| LOC114287583 | 2.374154 | 1.68623  | 1.765809 | 0.265587 | 0.679621 | 0.502006 | 1.854193 | 0.149054 | 43.60727 | 2.82E-09 | 1.2E-08  |
| LOC114287584 | 0.909541 | 1.291308 | 1.042801 | 0.071886 | 0.169802 | 0.135877 | 2.914392 | 0.045962 | 77.19933 | 1.03E-13 | 6.59E-13 |
| LOC114287590 | 2.859115 | 2.354455 | 2.424728 | 5.551978 | 4.886242 | 5.136087 | -1.12635 | 4.276587 | 325.7993 | 6.18E-30 | 1.45E-28 |
| LOC114287597 | 4.206948 | 4.131117 | 4.622349 | 0        | 0        | 0        | 9.094217 | 0.538768 | 233.9143 | 2.12E-26 | 3.82E-25 |
| LOC114287602 | 12.23909 | 10.64478 | 11.59276 | 3.52907  | 4.147871 | 3.402951 | 1.529822 | 3.023967 | 255.0233 | 7.01E-28 | 1.41E-26 |
| LOC114287612 | 0.368575 | 0.493531 | 0.404969 | 0.036216 | 0.085547 | 0.068455 | 2.549728 | -0.24552 | 52.36809 | 1.55E-10 | 7.46E-10 |
| LOC114287629 | 1.059783 | 1.003228 | 0.79346  | 0.358022 | 0.241624 | 0.232019 | 1.706084 | 1.048982 | 74.33204 | 2.26E-13 | 1.4E-12  |
| LOC114287639 | 0.523955 | 0.466489 | 0.749737 | 1.661261 | 1.447543 | 1.976152 | -1.65549 | 1.522009 | 109.1758 | 5.66E-17 | 4.73E-16 |
| LOC114287650 | 1.46302  | 1.620787 | 1.633408 | 0.300267 | 0.270195 | 0.454046 | 2.064088 | 0.409079 | 65.4625  | 2.81E-12 | 1.58E-11 |
| LOC114287659 | 0.96043  | 1.182827 | 1.132211 | 3.146239 | 3.121613 | 3.080034 | -1.62146 | 2.689604 | 241.4886 | 4.22E-27 | 7.99E-26 |
| LOC114287669 | 3.805633 | 3.984423 | 3.618996 | 0.040456 | 0        | 0.030587 | 7.095193 | 1.429099 | 435.3939 | 4.66E-36 | 1.76E-34 |
| LOC114287714 | 3.272194 | 2.914591 | 2.951362 | 0.843411 | 0.908732 | 0.939735 | 1.649253 | 1.336459 | 91.823   | 2.31E-15 | 1.71E-14 |

|              |          |          |          |          |          |          |          |          |          |          |          |
|--------------|----------|----------|----------|----------|----------|----------|----------|----------|----------|----------|----------|
| LOC114287726 | 27.63951 | 30.02189 | 28.64543 | 11.82479 | 13.10086 | 13.35755 | 1.061716 | 4.593947 | 345.1518 | 2.14E-32 | 6.05E-31 |
| LOC114287749 | 3.921481 | 4.21638  | 3.887545 | 1.500748 | 1.434847 | 0.769955 | 1.616801 | 1.466907 | 89.58292 | 4.75E-15 | 3.42E-14 |
| LOC114287791 | 0        | 0        | 0        | 3.67156  | 2.19146  | 2.372994 | -9.09948 | 0.345283 | 259.2018 | 4.59E-26 | 8.07E-25 |
| LOC114287797 | 0.116667 | 0.131367 | 0.054937 | 0.757429 | 0.57252  | 0.71011  | -2.81039 | -0.43712 | 66.98606 | 1.8E-12  | 1.03E-11 |
| LOC114287812 | 0.758829 | 0.382249 | 0.702111 | 1.742419 | 1.743485 | 1.921194 | -1.64413 | 0.906093 | 72.42627 | 3.84E-13 | 2.33E-12 |
| LOC114287841 | 0.921866 | 0.875828 | 1.076198 | 2.618418 | 2.845083 | 3.088342 | -1.6836  | 1.032149 | 87.06634 | 7.68E-15 | 5.41E-14 |
| LOC114287876 | 0.214801 | 0.172761 | 0.123625 | 0.446251 | 0.424564 | 0.492037 | -1.50366 | -0.04376 | 32.18225 | 1.72E-07 | 6.13E-07 |
| LOC114287890 | 0.025069 | 0.028228 | 0.027545 | 1.549441 | 1.25586  | 1.791684 | -5.74144 | -0.06376 | 182.4171 | 2.83E-23 | 4.02E-22 |
| LOC114287908 | 11.77154 | 10.45443 | 11.47654 | 22.52877 | 23.13704 | 21.93253 | -1.10723 | 3.6381   | 255.5623 | 6.54E-28 | 1.32E-26 |
| LOC114287927 | 3.546516 | 3.671756 | 3.452115 | 1.471112 | 1.805592 | 1.472113 | 1.054608 | 1.736959 | 53.86917 | 9.58E-11 | 4.71E-10 |
| LOC114287945 | 25.89696 | 26.21882 | 25.02418 | 9.785797 | 10.03019 | 9.8504   | 1.271982 | 4.063678 | 389.5947 | 2.76E-34 | 8.98E-33 |
| LOC114287977 | 0.534282 | 0.18048  | 0.498982 | 1.01979  | 1.185305 | 1.395202 | -1.66212 | -0.06393 | 36.02318 | 4.31E-08 | 1.64E-07 |
| LOC114287991 | 1.608289 | 1.728615 | 1.590385 | 0.664451 | 0.711506 | 0.602845 | 1.208912 | 1.298543 | 51.6212  | 1.96E-10 | 9.4E-10  |
| LOC114288005 | 16.15531 | 15.23797 | 15.08658 | 0        | 0        | 0        | 11.91977 | 3.22098  | 1774.659 | 1.06E-59 | 2.4E-57  |
| LOC114288044 | 0.345766 | 0.175199 | 0.24694  | 2.231319 | 2.251757 | 2.447385 | -3.25107 | 1.188114 | 263.4332 | 2.38E-28 | 4.98E-27 |
| LOC114288047 | 0.922077 | 0.747545 | 0.607875 | 2.1455   | 2.164409 | 2.788066 | -1.74032 | 0.406425 | 58.04032 | 2.6E-11  | 1.34E-10 |
| LOC114288054 | 0.759269 | 0.480901 | 1.459921 | 2.932958 | 4.346941 | 3.326281 | -2.08745 | 0.540753 | 75.25722 | 2.45E-12 | 1.39E-11 |
| LOC114288092 | 0.282667 | 0.318283 | 0.381752 | 0.04282  | 0.118002 | 0.113312 | 1.662746 | 0.234762 | 38.78477 | 1.52E-08 | 6.08E-08 |
| LOC114288113 | 2.697665 | 2.326645 | 1.955003 | 4.069171 | 5.011273 | 4.733195 | -1.09258 | 0.911641 | 35.23436 | 5.51E-08 | 2.07E-07 |
| LOC114288153 | 1.81527  | 1.226394 | 1.462643 | 5.719718 | 3.983878 | 4.158179 | -1.67807 | -0.31583 | 31.78955 | 2E-07    | 7.05E-07 |
| LOC114288160 | 0.209157 | 0.285976 | 0.377543 | 0.515998 | 0.727027 | 0.533863 | -1.14809 | -0.07819 | 18.35077 | 4.63E-05 | 0.000122 |
| LOC114288203 | 0.358404 | 0.465648 | 0.605836 | 0.400932 | 1.183801 | 1.174638 | -1.11781 | -0.26633 | 13.98143 | 0.000358 | 0.00083  |
| LOC114288229 | 0.782282 | 0.722295 | 0.68762  | 0.028441 | 0        | 0.043007 | 4.709167 | -0.24409 | 98.38589 | 4.66E-16 | 3.62E-15 |
| LOC114288235 | 1.860922 | 1.842937 | 2.044673 | 0.652111 | 0.738085 | 0.616301 | 1.406333 | 0.873455 | 49.95679 | 3.37E-10 | 1.58E-09 |
| LOC114288251 | 0.108394 | 0.183077 | 0.119097 | 2.364488 | 1.47386  | 1.936694 | -3.82626 | -0.7381  | 78.26582 | 7.73E-14 | 4.98E-13 |
| LOC114288289 | 3.21057  | 2.778458 | 3.043803 | 1.233948 | 1.168509 | 0.958166 | 1.333431 | 2.768218 | 161.5632 | 1.01E-21 | 1.26E-20 |

|              |          |          |          |          |          |          |          |          |          |          |          |
|--------------|----------|----------|----------|----------|----------|----------|----------|----------|----------|----------|----------|
| LOC114288302 | 4.278211 | 3.829868 | 3.999931 | 1.40083  | 1.7115   | 1.679992 | 1.218638 | 1.711868 | 69.59306 | 8.53E-13 | 5.02E-12 |
| LOC114288310 | 2.826781 | 2.800995 | 2.795312 | 0.976331 | 0.80919  | 0.777026 | 1.622777 | 1.03253  | 71.66145 | 4.76E-13 | 2.87E-12 |
| LOC114288311 | 4.239888 | 4.165162 | 4.468397 | 0.589849 | 0.743084 | 0.594623 | 2.620513 | 1.813691 | 257.9911 | 4.78E-28 | 9.73E-27 |
| LOC114288325 | 0.082182 | 0.154228 | 0        | 1.792712 | 1.411521 | 1.091862 | -4.19445 | -0.24015 | 113.795  | 5.19E-17 | 4.35E-16 |
| LOC114288327 | 9.35284  | 9.764098 | 9.391636 | 2.871164 | 1.773065 | 3.022094 | 1.795747 | 2.560367 | 218.1715 | 3.13E-25 | 5.2E-24  |
| LOC114288363 | 0        | 0        | 0        | 1.41093  | 1.699053 | 1.757019 | -7.90495 | -0.82027 | 116.694  | 9.35E-18 | 8.35E-17 |
| LOC114288341 | 1.322859 | 1.160452 | 1.656291 | 3.299501 | 3.148322 | 2.875193 | -1.27022 | 2.16108  | 103.4376 | 1.41E-16 | 1.14E-15 |
| LOC114288386 | 1.68824  | 1.542284 | 1.85494  | 5.964125 | 6.246072 | 6.348036 | -1.97276 | 1.926825 | 208.7727 | 4.47E-25 | 7.3E-24  |
| LOC114288457 | 1.046515 | 1.126387 | 1.183669 | 0.279761 | 0.374467 | 0.211519 | 1.84042  | 0.565406 | 60.9851  | 1.06E-11 | 5.68E-11 |
| LOC114288480 | 0.836663 | 0.911444 | 1.02391  | 0.07419  | 0.097358 | 0.037395 | 3.617916 | 1.204563 | 234.991  | 1.03E-26 | 1.9E-25  |
| LOC114288484 | 1.29166  | 1.11741  | 1.211513 | 2.892058 | 2.863296 | 2.597938 | -1.30304 | 1.959798 | 100.3027 | 2.95E-16 | 2.32E-15 |
| LOC114288519 | 0.883392 | 1.022328 | 0.997581 | 0.401462 | 0.316098 | 0.236082 | 1.518439 | -0.17754 | 25.27827 | 2.55E-06 | 7.94E-06 |
| LOC114288535 | 2.935234 | 2.612069 | 3.277081 | 1.204842 | 1.355218 | 1.138681 | 1.146025 | 1.454649 | 51.51712 | 2.03E-10 | 9.71E-10 |
| LOC114288545 | 0.30167  | 0.358551 | 0.276215 | 0.974902 | 1.199383 | 0.829231 | -1.7811  | 0.293089 | 55.07412 | 6.55E-11 | 3.26E-10 |
| LOC114288614 | 0        | 0        | 0.022554 | 1.604512 | 1.351479 | 1.184911 | -7.10846 | 0.041551 | 210.0333 | 3.7E-25  | 6.1E-24  |
| LOC114288630 | 28.49512 | 29.56344 | 28.59718 | 6.107311 | 7.955119 | 7.895445 | 1.862125 | 4.69624  | 896.4883 | 5.16E-38 | 2.25E-36 |
| LOC114288640 | 18.25596 | 17.90646 | 17.9357  | 1.395887 | 1.666339 | 1.463925 | 3.465716 | 4.540151 | 2433.494 | 1.78E-66 | 6.8E-64  |
| LOC114288663 | 4.234862 | 4.145432 | 4.442581 | 17.52409 | 16.66102 | 18.39712 | -2.14108 | 3.978042 | 1024.935 | 1.18E-50 | 1.31E-48 |
| LOC114288695 | 1.968033 | 1.607509 | 1.993979 | 0.982355 | 0.819651 | 0.753815 | 1.034942 | 2.354053 | 73.64888 | 2.73E-13 | 1.68E-12 |
| LOC114288736 | 1.571317 | 1.948469 | 2.185407 | 0.036157 | 0.142343 | 0.136685 | 3.955443 | 0.709933 | 174.8778 | 9.98E-23 | 1.35E-21 |
| LOC114288698 | 0.752469 | 0.756033 | 0.53422  | 2.041259 | 1.706635 | 1.845637 | -1.54516 | 1.755188 | 115.8572 | 8.48E-18 | 7.61E-17 |
| LOC114288699 | 1.026771 | 0.653471 | 0.637653 | 4.950245 | 4.089345 | 4.601718 | -2.62812 | 0.871465 | 157.5325 | 2.1E-21  | 2.53E-20 |
| LOC114288713 | 1.232734 | 1.41376  | 1.555116 | 0.041498 | 0.065348 | 0.156877 | 3.763462 | 0.136772 | 110.4857 | 2.8E-17  | 2.4E-16  |
| LOC114288752 | 1.962271 | 1.92512  | 1.430237 | 0.776983 | 0.583963 | 0.720965 | 1.258198 | 1.003042 | 42.90878 | 3.59E-09 | 1.52E-08 |
| LOC114288720 | 5.888153 | 5.70004  | 6.674477 | 2.566929 | 2.593127 | 2.306962 | 1.186617 | 2.294866 | 94.96772 | 1.07E-15 | 8.05E-15 |
| LOC114288763 | 3.772064 | 3.35911  | 3.7348   | 0.13036  | 0.102641 | 0.059137 | 5.12596  | 1.990618 | 562.1808 | 2.96E-40 | 1.52E-38 |

|              |          |          |          |          |          |          |          |          |          |          |          |
|--------------|----------|----------|----------|----------|----------|----------|----------|----------|----------|----------|----------|
| LOC114288725 | 2.133996 | 1.988586 | 1.859598 | 0.735715 | 0.421292 | 0.91023  | 1.423443 | 0.258916 | 31.19281 | 2.5E-07  | 8.74E-07 |
| LOC114288766 | 1.936288 | 1.124195 | 1.429401 | 0        | 0        | 0        | 8.273896 | -0.20331 | 121.8428 | 6.89E-18 | 6.22E-17 |
| LOC114288731 | 10.33972 | 9.23051  | 11.17964 | 1.90953  | 2.240509 | 2.462847 | 2.095265 | 3.180978 | 482.1305 | 1.03E-37 | 4.38E-36 |
| LOC114288776 | 1.490512 | 1.031253 | 1.381183 | 0.2938   | 0.308437 | 0.320859 | 1.966098 | 0.540961 | 66.22411 | 2.25E-12 | 1.28E-11 |
| LOC114288850 | 0.186105 | 0.192091 | 0.153361 | 0.704803 | 0.843506 | 0.873924 | -2.29007 | -0.00162 | 69.87027 | 7.89E-13 | 4.66E-12 |
| LOC114288833 | 14.41752 | 14.22824 | 14.97122 | 0.417378 | 0.339962 | 0.315567 | 5.254179 | 4.786991 | 4426.321 | 9.58E-78 | 8.47E-75 |
| LOC114288835 | 68.12396 | 63.57259 | 66.76359 | 11.16341 | 11.09483 | 11.70887 | 2.440141 | 6.243678 | 4369.26  | 1.69E-77 | 1.45E-74 |
| LOC114288855 | 1.569643 | 1.315285 | 1.223285 | 0.033178 | 0.026123 | 0.025085 | 5.393753 | 0.352182 | 173.9621 | 1.17E-22 | 1.56E-21 |
| LOC114288893 | 1.359405 | 2.168474 | 1.120227 | 0.617789 | 0.378332 | 0.363294 | 1.689696 | -0.15967 | 27.97429 | 9.7E-07  | 3.17E-06 |
| LOC114288876 | 0.405885 | 0.520064 | 0.584366 | 1.043135 | 1.041686 | 1.173406 | -1.22461 | 0.820378 | 41.12379 | 6.67E-09 | 2.75E-08 |
| LOC114288883 | 6.07273  | 6.558783 | 5.73862  | 3.121856 | 2.559407 | 2.895675 | 1.000304 | 2.939502 | 109.4157 | 3.56E-17 | 3.03E-16 |
| LOC114288934 | 2.669709 | 2.574444 | 2.121017 | 0.696849 | 0.489889 | 0.489233 | 2.05581  | 1.763566 | 165.1351 | 5.38E-22 | 6.8E-21  |
| LOC114288983 | 11.599   | 11.12158 | 10.79981 | 5.173412 | 4.894891 | 4.897542 | 1.061967 | 3.34706  | 183.3878 | 2.41E-23 | 3.44E-22 |
| LOC114288982 | 0.586344 | 0.427203 | 0.669505 | 0.083598 | 0.082277 | 0.094808 | 2.559122 | -0.06099 | 60.90695 | 1.09E-11 | 5.81E-11 |
| LOC114289000 | 1.035887 | 1.044543 | 1.070222 | 0.42158  | 0.309809 | 0.488741 | 1.257513 | 0.598334 | 33.1762  | 1.18E-07 | 4.29E-07 |
| LOC114288996 | 4.333293 | 3.210051 | 3.382936 | 0.207293 | 0.040804 | 0.039182 | 5.227134 | 1.062468 | 273.288  | 2.05E-28 | 4.31E-27 |
| LOC114289011 | 0.969759 | 0.825618 | 0.883598 | 2.063823 | 2.065085 | 2.53564  | -1.42116 | 1.028643 | 63.57212 | 4.9E-12  | 2.7E-11  |
| LOC114289050 | 1.566573 | 1.971482 | 2.075636 | 0.251272 | 0.395686 | 0.253306 | 2.486799 | -0.29271 | 49.16701 | 4.37E-10 | 2.02E-09 |
| LOC114289077 | 1.005777 | 1.255845 | 0.973792 | 0.380147 | 0.228049 | 0.465342 | 1.479537 | 1.179061 | 61.6221  | 1.24E-11 | 6.6E-11  |
| LOC114289083 | 2.629474 | 2.446207 | 2.541492 | 6.863138 | 6.500666 | 6.744748 | -1.50356 | 4.331849 | 644.5357 | 1.46E-42 | 8.83E-41 |
| LOC114289103 | 0.857815 | 0.866831 | 1.015018 | 0.039983 | 0        | 0        | 5.880618 | -0.4148  | 96.60633 | 7.15E-16 | 5.46E-15 |
| LOC114289112 | 0.493041 | 0.337452 | 0.318661 | 0        | 0        | 0        | 7.954014 | -0.48057 | 98.51374 | 5.67E-16 | 4.38E-15 |
| LOC114289115 | 57.1375  | 55.89292 | 55.405   | 4.36501  | 4.112967 | 4.490507 | 3.593207 | 5.494598 | 5439.47  | 1.16E-81 | 1.68E-78 |
| LOC114289126 | 0.826546 | 0.638186 | 0.882213 | 1.674228 | 1.521036 | 1.525491 | -1.09969 | 0.637729 | 29.71194 | 4.42E-07 | 1.5E-06  |
| LOC114289133 | 7.463457 | 8.088938 | 8.181207 | 0.031773 | 0        | 0        | 9.322961 | 2.766494 | 1168.46  | 5.31E-53 | 7.16E-51 |
| LOC114289165 | 1.922854 | 1.527454 | 1.939071 | 4.429109 | 3.902041 | 4.181369 | -1.31165 | 2.793976 | 174.6631 | 1.04E-22 | 1.4E-21  |

|              |          |          |          |          |          |          |          |          |          |          |          |
|--------------|----------|----------|----------|----------|----------|----------|----------|----------|----------|----------|----------|
| LOC114289173 | 2.001875 | 2.657473 | 2.199544 | 13.44534 | 11.34042 | 11.41097 | -2.50104 | 3.389728 | 815.409  | 5.61E-43 | 3.49E-41 |
| LOC114289194 | 3.902364 | 3.521063 | 4.060528 | 1.221449 | 1.516571 | 1.775963 | 1.218955 | 1.674346 | 66.69784 | 1.96E-12 | 1.12E-11 |
| LOC114289226 | 15.90929 | 15.83039 | 15.30198 | 2.852984 | 2.837487 | 2.701995 | 2.38274  | 4.054781 | 1123.983 | 2.65E-52 | 3.35E-50 |
| LOC114289235 | 1639.376 | 1551.051 | 1637.064 | 238.6355 | 239.0507 | 235.232  | 2.653656 | 9.154959 | 12100.19 | 5.83E-97 | 9.27E-93 |
| LOC114289244 | 2.262146 | 2.354932 | 2.063446 | 8.301942 | 5.864676 | 7.332765 | -1.77573 | 1.754076 | 147.9253 | 1.25E-20 | 1.4E-19  |
| LOC114289253 | 51.8273  | 52.95796 | 51.5496  | 3.207837 | 3.294447 | 2.530798 | 4.014508 | 5.397371 | 5000.299 | 1.35E-62 | 3.67E-60 |
| LOC114289264 | 3.430089 | 3.050112 | 3.293281 | 1.048927 | 1.147069 | 1.498006 | 1.280594 | 2.100413 | 94.78886 | 1.11E-15 | 8.39E-15 |
| LOC114289272 | 7.492056 | 6.860484 | 7.142327 | 3.204522 | 3.264304 | 3.28598  | 1.033508 | 3.826553 | 244.8116 | 2.7E-27  | 5.18E-26 |
| LOC114289274 | 4.079611 | 3.862827 | 4.278691 | 0.303382 | 0.238873 | 0.305837 | 3.736453 | 1.85431  | 404.8689 | 6.78E-35 | 2.33E-33 |
| LOC114289276 | 3.332946 | 3.213091 | 2.984819 | 1.244939 | 1.208942 | 1.255014 | 1.255479 | 1.582878 | 67.81162 | 1.42E-12 | 8.2E-12  |
| LOC114289313 | 1.151549 | 1.166107 | 1.256763 | 0.280981 | 0.320791 | 0.30804  | 1.855702 | 1.584993 | 132.8062 | 2.4E-19  | 2.44E-18 |
| LOC114289352 | 2.585594 | 2.253966 | 2.932542 | 0.129958 | 0.306974 | 0.294772 | 3.242585 | 1.872332 | 322.461  | 1.25E-30 | 3.1E-29  |
| LOC114289356 | 1.448725 | 1.631262 | 1.46797  | 0.087784 | 0.115197 | 0.044247 | 4.070393 | 0.688947 | 184.209  | 2.11E-23 | 3.02E-22 |
| LOC114289372 | 1.167571 | 0.994586 | 0.959356 | 0.221472 | 0.334227 | 0.320942 | 1.699298 | 1.055456 | 76.74107 | 1.17E-13 | 7.43E-13 |
| LOC114289374 | 0.290073 | 0.153704 | 0.056244 | 0.496284 | 0.805936 | 0.703547 | -2.08515 | -0.3432  | 41.18557 | 1.02E-08 | 4.15E-08 |
| LOC114289380 | 1.739047 | 1.333577 | 1.466017 | 0.436038 | 0.493525 | 0.844793 | 1.218274 | 1.144001 | 43.12794 | 4.03E-09 | 1.7E-08  |
| LOC114289390 | 2.604719 | 2.340944 | 2.494328 | 0.608154 | 0.581449 | 0.459807 | 2.076606 | 1.007228 | 104.2268 | 1.17E-16 | 9.55E-16 |
| LOC114289421 | 2.329059 | 2.32081  | 2.445803 | 0.337206 | 0.206504 | 0.226624 | 3.117482 | 1.015926 | 181.842  | 3.11E-23 | 4.4E-22  |
| LOC114289436 | 0.290904 | 0.257366 | 0.324194 | 0.045327 | 0.071377 | 0.051405 | 2.239873 | 0.449625 | 76.13851 | 1.38E-13 | 8.7E-13  |
| LOC114289438 | 2.385148 | 1.66436  | 2.325376 | 0.122134 | 0        | 0.184684 | 4.215347 | 0.161229 | 118.1647 | 7.84E-18 | 7.06E-17 |
| LOC114289447 | 0.391102 | 0.356498 | 0.327406 | 0.575534 | 0.826344 | 0.639917 | -1.03553 | -0.15052 | 14.74216 | 0.00023  | 0.000549 |
| LOC114289465 | 0.142288 | 0.124613 | 0.138967 | 0        | 0        | 0        | 7.734312 | -0.66493 | 87.19027 | 9.05E-15 | 6.33E-14 |
| LOC114289485 | 7.862594 | 9.158548 | 8.128283 | 1.61938  | 1.995724 | 1.96963  | 2.045965 | 2.019902 | 200.0567 | 1.69E-24 | 2.63E-23 |
| LOC114289478 | 2.782504 | 2.645723 | 2.853436 | 0        | 0.088502 | 0        | 6.223634 | 1.106162 | 312.9741 | 6.67E-31 | 1.7E-29  |
| LOC114289528 | 7.405976 | 6.349966 | 7.577352 | 0.86458  | 0.680741 | 1.260674 | 2.801302 | 1.865553 | 277.9085 | 3.94E-29 | 8.75E-28 |
| LOC114289553 | 12.34926 | 11.91361 | 13.56865 | 0.467682 | 0.966623 | 0.618801 | 4.057217 | 2.639695 | 713.4817 | 2.65E-44 | 1.8E-42  |

|              |          |          |          |          |          |          |          |          |          |          |          |
|--------------|----------|----------|----------|----------|----------|----------|----------|----------|----------|----------|----------|
| LOC114289603 | 0.041335 | 0.034908 | 0.034063 | 0.469627 | 0.547258 | 0.596519 | -3.92444 | -0.20336 | 123.8652 | 1.52E-18 | 1.45E-17 |
| LOC114289611 | 1.118027 | 1.522665 | 1.123129 | 3.445357 | 3.337607 | 3.307383 | -1.53064 | 2.733481 | 212.6929 | 4.13E-25 | 6.77E-24 |
| LOC114289645 | 3.773177 | 3.059763 | 3.423094 | 1.447304 | 1.585473 | 1.498664 | 1.070934 | 2.123771 | 70.29743 | 6.99E-13 | 4.15E-12 |
| LOC114289651 | 1.359086 | 1.38686  | 1.376622 | 0        | 0        | 0        | 8.646696 | 0.134518 | 169.8233 | 3.62E-22 | 4.65E-21 |
| LOC114289733 | 0.325368 | 0.34971  | 0.373745 | 0.134423 | 0.084672 | 0.172776 | 1.301291 | 0.10275  | 23.81133 | 4.62E-06 | 1.4E-05  |
| LOC114289725 | 3.075982 | 3.212794 | 3.104439 | 0.303616 | 0.458192 | 0.516498 | 2.732174 | 1.972052 | 296.3402 | 4.41E-30 | 1.05E-28 |
| LOC114289749 | 1.982466 | 1.369115 | 1.626403 | 0        | 0        | 0.018165 | 7.483034 | 1.011635 | 307.1978 | 2.14E-30 | 5.19E-29 |
| LOC114289762 | 3.201081 | 3.2521   | 3.252713 | 1.006292 | 1.136808 | 1.15778  | 1.437472 | 1.48607  | 80.98403 | 3.74E-14 | 2.49E-13 |
| LOC114289775 | 3.253047 | 2.538342 | 3.229374 | 6.276566 | 5.677124 | 6.431946 | -1.12705 | 3.290586 | 194.3208 | 5.82E-24 | 8.71E-23 |
| LOC114289773 | 1.323809 | 1.768516 | 1.627095 | 0.163149 | 0.032115 | 0.185028 | 3.507268 | 0.327748 | 115.4395 | 9.3E-18  | 8.31E-17 |
| LOC114289833 | 10.35934 | 11.21859 | 11.13116 | 21.0192  | 20.73632 | 21.75463 | -1.06376 | 5.00581  | 523.2588 | 4.63E-39 | 2.19E-37 |
| LOC114289849 | 7.132927 | 6.735322 | 6.874776 | 1.182899 | 0.85973  | 1.203938 | 2.57401  | 2.281519 | 338.9238 | 4.08E-32 | 1.13E-30 |
| LOC114289872 | 0.812308 | 0.457328 | 0.720879 | 0.283967 | 0.111793 | 0.364988 | 1.289318 | -0.02817 | 19.32658 | 3.43E-05 | 9.22E-05 |
| LOC114289912 | 0.911651 | 0.916139 | 0.893962 | 2.744211 | 3.114775 | 3.017912 | -1.81506 | 2.599115 | 278.6279 | 3.61E-29 | 8.05E-28 |
| LOC114289924 | 0.064182 | 0.02409  | 0.011753 | 0.194453 | 0.398074 | 0.411655 | -3.37027 | -0.82113 | 60.26288 | 1.51E-11 | 7.98E-11 |
| LOC114289957 | 0.057452 | 0.129381 | 0.189374 | 2.506492 | 2.261334 | 2.487296 | -4.34678 | 0.438514 | 213.2136 | 2.3E-25  | 3.86E-24 |
| LOC114289936 | 12.42393 | 10.79877 | 10.11828 | 6.141397 | 4.367575 | 5.017786 | 1.017082 | 2.190603 | 64.02146 | 4.29E-12 | 2.38E-11 |
| LOC114290023 | 1.363963 | 2.104642 | 1.942686 | 0.688734 | 0.650743 | 0.867885 | 1.163615 | 0.684465 | 29.02756 | 5.76E-07 | 1.94E-06 |
| LOC114290028 | 24.69524 | 24.66131 | 23.86458 | 5.048045 | 5.488818 | 5.020744 | 2.127053 | 4.729802 | 1343.119 | 1.61E-55 | 2.63E-53 |
| LOC114290040 | 0.199172 | 0.105537 | 0.18022  | 16.95285 | 17.42297 | 18.80764 | -6.8539  | 4.570454 | 4983.456 | 1.5E-79  | 1.66E-76 |
| LOC114290053 | 2.804394 | 2.569535 | 3.111514 | 0.149938 | 0.078704 | 0.075576 | 4.696571 | 0.783415 | 222.9388 | 5.59E-26 | 9.76E-25 |
| LOC114290062 | 0.530519 | 0.716836 | 0.777205 | 0.225024 | 0.354353 | 0.267353 | 1.115422 | -0.13773 | 14.89029 | 0.000215 | 0.000516 |
| LOC114290110 | 30.45608 | 27.17838 | 31.60776 | 9.865433 | 8.989903 | 10.14522 | 1.516714 | 4.948236 | 864.9744 | 3.01E-46 | 2.34E-44 |
| LOC114290123 | 0.874769 | 0.933146 | 0.935852 | 0.083693 | 0.098846 | 0.031639 | 3.538111 | -0.40261 | 69.0451  | 9.98E-13 | 5.84E-12 |
| LOC114290126 | 2.372868 | 2.150508 | 2.352811 | 0.140275 | 0.248507 | 0.159086 | 3.503105 | 1.030742 | 208.7646 | 4.47E-25 | 7.3E-24  |
| LOC114290128 | 3.959144 | 3.962656 | 3.020887 | 1.39942  | 1.652785 | 1.284786 | 1.228145 | 1.524677 | 58.86645 | 2.02E-11 | 1.05E-10 |

|              |          |          |          |          |          |          |          |          |          |          |          |
|--------------|----------|----------|----------|----------|----------|----------|----------|----------|----------|----------|----------|
| LOC114290159 | 6.254542 | 5.961058 | 6.01311  | 0.203029 | 0.19183  | 0.214906 | 4.772859 | 2.102576 | 593.1734 | 3.72E-41 | 2.03E-39 |
| LOC114290277 | 5.796483 | 5.855628 | 6.436591 | 1.905622 | 2.265345 | 1.977546 | 1.442726 | 2.575952 | 163.3375 | 7.4E-22  | 9.26E-21 |
| LOC114290285 | 17.95678 | 17.00851 | 16.97785 | 5.603816 | 4.026184 | 4.342798 | 1.809435 | 3.099404 | 359.0709 | 5.23E-33 | 1.54E-31 |
| LOC114290307 | 0.922454 | 0.858041 | 1.160428 | 0.315929 | 0.344426 | 0.404233 | 1.340162 | 0.67887  | 38.88369 | 1.47E-08 | 5.87E-08 |
| LOC114290300 | 0.378697 | 0.330687 | 0.305699 | 0.056196 | 0.066371 | 0.05311  | 2.404218 | -0.18098 | 52.14078 | 1.66E-10 | 8.01E-10 |
| LOC114290302 | 1.636007 | 1.319371 | 1.60322  | 4.179633 | 3.733909 | 3.433563 | -1.40562 | 1.879432 | 107.5944 | 5.39E-17 | 4.51E-16 |
| LOC114290333 | 8.109059 | 8.033179 | 7.217838 | 2.05447  | 2.143347 | 2.640648 | 1.654607 | 3.41783  | 398.3313 | 3.09E-34 | 1E-32    |
| LOC114290341 | 11.42703 | 11.86605 | 11.39282 | 0.230803 | 0.181727 | 0.116336 | 5.918469 | 2.083747 | 655.5705 | 7.49E-43 | 4.63E-41 |
| LOC114290360 | 0.718766 | 0.642185 | 0.815491 | 0.298243 | 0.10064  | 0.257706 | 1.652539 | 0.935708 | 61.07618 | 1.99E-11 | 1.04E-10 |
| LOC114290351 | 18.61457 | 15.66809 | 19.54135 | 100.6763 | 96.81125 | 94.10302 | -2.53876 | 4.268136 | 1463.617 | 4.4E-57  | 8.32E-55 |
| LOC114290353 | 0.989064 | 0.816702 | 0.91768  | 0.239726 | 0.314586 | 0.392707 | 1.383696 | -0.09149 | 23.28066 | 5.75E-06 | 1.72E-05 |
| LOC114290405 | 1.229599 | 0.851296 | 0.985874 | 0.075513 | 0.083239 | 0.057093 | 3.716743 | 1.067085 | 217.1132 | 1.3E-25  | 2.21E-24 |
| LOC114290407 | 18.836   | 16.86104 | 17.08484 | 3.808647 | 2.881201 | 3.754776 | 2.239614 | 3.932098 | 889.7195 | 1.66E-46 | 1.31E-44 |
| LOC114290463 | 0.700432 | 0.922929 | 0.540353 | 0.243816 | 0.106651 | 0.040965 | 2.446306 | -0.05336 | 50.72043 | 7.18E-10 | 3.26E-09 |
| LOC114290468 | 10.66927 | 10.59885 | 10.90807 | 21.26692 | 19.89926 | 20.29726 | -1.03742 | 4.531298 | 352.8781 | 9.73E-33 | 2.81E-31 |
| LOC114290474 | 12.35341 | 10.68082 | 11.80384 | 4.972464 | 4.830791 | 5.366425 | 1.092787 | 3.505609 | 210.547  | 3.43E-25 | 5.67E-24 |
| LOC114290490 | 0.027486 | 0.046423 | 0.050333 | 0.149892 | 0.203257 | 0.17629  | -2.20816 | -0.39332 | 48.11531 | 6.18E-10 | 2.82E-09 |
| LOC114290504 | 5.247737 | 5.077995 | 5.901046 | 11.55168 | 11.03184 | 11.38221 | -1.16962 | 2.643348 | 129.3338 | 4.86E-19 | 4.83E-18 |
| LOC114290507 | 4.912132 | 5.013525 | 4.292482 | 1.09659  | 1.151225 | 1.381831 | 1.849329 | 1.680427 | 137.7848 | 8.85E-20 | 9.34E-19 |
| LOC114290543 | 1.339928 | 0.771142 | 1.832114 | 0.324767 | 0.25571  | 0.450168 | 1.809    | -0.08731 | 32.12165 | 2.66E-07 | 9.25E-07 |
| LOC114290573 | 1.081715 | 0.661205 | 1.086652 | 0.393273 | 0.221179 | 0.339819 | 1.481135 | -0.49408 | 18.41996 | 4.49E-05 | 0.000119 |
| LOC114290570 | 3.345842 | 2.472363 | 2.872044 | 5.816049 | 6.135746 | 6.121785 | -1.15787 | 2.707964 | 128.2815 | 6.04E-19 | 5.95E-18 |
| LOC114290571 | 1.396704 | 1.328648 | 1.305306 | 0.014592 | 0.045956 | 0.044129 | 5.050521 | 1.427395 | 378.6379 | 7.75E-34 | 2.42E-32 |
| LOC114290587 | 1.449083 | 1.338801 | 1.510518 | 6.281491 | 6.222179 | 5.668454 | -2.17608 | 1.630241 | 203.2356 | 1.03E-24 | 1.63E-23 |
| LOC114290585 | 3.766686 | 3.492819 | 3.469133 | 6.998203 | 8.047198 | 6.471166 | -1.10781 | 2.572231 | 105.6951 | 8.34E-17 | 6.87E-16 |
| LOC114290602 | 0.184811 | 0.187287 | 0.243672 | 0.739099 | 0.608393 | 0.685813 | -1.81673 | 0.565536 | 71.0123  | 5.71E-13 | 3.42E-12 |



|              |          |          |          |          |          |          |          |          |          |          |          |
|--------------|----------|----------|----------|----------|----------|----------|----------|----------|----------|----------|----------|
| LOC114290604 | 0.263963 | 0.281579 | 0.259498 | 0.454583 | 0.55677  | 0.763771 | -1.26844 | -0.01195 | 23.85022 | 4.55E-06 | 1.38E-05 |
| LOC114290609 | 4.617992 | 4.519111 | 4.985946 | 15.84927 | 15.58595 | 16.14772 | -1.85805 | 5.439395 | 1965.54  | 1.66E-62 | 4.48E-60 |
| LOC114290662 | 0.322037 | 0.379881 | 0.404384 | 0.864171 | 0.943807 | 0.906292 | -1.40468 | 0.380649 | 39.49455 | 1.18E-08 | 4.77E-08 |
| LOC114290665 | 0.864387 | 0.621829 | 0.791448 | 1.614948 | 1.134091 | 1.683019 | -1.04835 | 0.542445 | 24.58586 | 3.37E-06 | 1.04E-05 |
| LOC114290705 | 0.435107 | 0.427386 | 0.284808 | 0.185115 | 0.132503 | 0.127236 | 1.286398 | -0.06263 | 20.18199 | 2.11E-05 | 5.83E-05 |
| LOC114290740 | 0        | 0.035381 | 0.034524 | 1.656456 | 1.619054 | 1.641071 | -6.00374 | -0.29042 | 157.9743 | 1.94E-21 | 2.34E-20 |
| LOC114290787 | 9.621748 | 9.805878 | 10.47892 | 0.307392 | 0.55667  | 0.627507 | 4.16744  | 3.207056 | 1169     | 5.21E-53 | 7.05E-51 |
| LOC114290767 | 0.578748 | 0.695114 | 0.720681 | 0.110216 | 0.126226 | 0.212115 | 2.002039 | 1.216464 | 107.5151 | 5.49E-17 | 4.59E-16 |
| LOC114290853 | 0.028961 | 0.065219 | 0.095461 | 0.434323 | 0.30052  | 0.358231 | -2.61603 | -0.12421 | 73.07313 | 3.2E-13  | 1.96E-12 |
| LOC114290821 | 3.241102 | 4.339915 | 3.561134 | 0.796182 | 1.211981 | 1.083544 | 1.710675 | 1.346094 | 91.75148 | 2.36E-15 | 1.74E-14 |
| LOC114290844 | 1.202134 | 1.44384  | 1.276807 | 4.589056 | 4.588277 | 5.121859 | -1.97513 | 1.22376  | 131.2172 | 3.31E-19 | 3.33E-18 |
| LOC114290824 | 4.834604 | 4.026886 | 4.366012 | 24.19832 | 21.80188 | 23.39291 | -2.48635 | 2.676074 | 497.2292 | 3.22E-38 | 1.42E-36 |
| LOC114290832 | 4.007358 | 3.74467  | 4.19049  | 0.837317 | 0.76476  | 0.595086 | 2.352447 | 2.943278 | 473.8752 | 1.97E-37 | 8.28E-36 |
| LOC114290849 | 0.996468 | 1.04374  | 0.942089 | 0.140419 | 0.110561 | 0.138016 | 2.829007 | 1.197758 | 185.0521 | 1.83E-23 | 2.65E-22 |
| LOC114290893 | 1.290968 | 1.159222 | 1.274801 | 3.148804 | 2.783323 | 3.144341 | -1.38394 | 2.002479 | 115.8087 | 8.58E-18 | 7.69E-17 |
| LOC114290954 | 0.848621 | 0.838198 | 1.16143  | 0.460086 | 0.319638 | 0.511555 | 1.032065 | 0.571174 | 21.82382 | 1.05E-05 | 3.03E-05 |
| LOC114291019 | 1.46069  | 1.218321 | 1.525665 | 0        | 0.025811 | 0        | 6.787369 | 0.379903 | 192.3652 | 5.64E-24 | 8.44E-23 |
| LOC114291057 | 0.645014 | 0.62649  | 0.660014 | 1.288878 | 1.324903 | 1.258705 | -1.10801 | 2.589235 | 112.5318 | 1.77E-17 | 1.54E-16 |
| LOC114291031 | 4.235807 | 3.762476 | 4.141629 | 1.436258 | 1.390017 | 1.357389 | 1.434764 | 3.890411 | 446.0095 | 1.9E-36  | 7.43E-35 |
| LOC114291044 | 4.318342 | 4.167809 | 4.230791 | 0.579198 | 0.688913 | 0.540404 | 2.704559 | 3.414495 | 895.2366 | 2.95E-48 | 2.62E-46 |
| LOC114291097 | 0.972461 | 1.167027 | 0.899775 | 0.18608  | 0.201456 | 0.158276 | 2.361665 | 0.598716 | 91.08515 | 2.78E-15 | 2.04E-14 |
| LOC114291181 | 1.259244 | 1.243777 | 1.165123 | 3.895453 | 4.205472 | 4.099037 | -1.83906 | 1.88002  | 180.272  | 4.03E-23 | 5.65E-22 |
| LOC114291183 | 4.164063 | 5.444972 | 4.476838 | 13.59258 | 15.12427 | 16.30772 | -1.79404 | 2.757002 | 291.9508 | 7.36E-30 | 1.72E-28 |
| LOC114291154 | 0.068735 | 0.077396 | 0.13594  | 0.7247   | 0.826392 | 0.699075 | -3.0842  | -0.06456 | 101.2166 | 2.37E-16 | 1.88E-15 |
| LOC114291246 | 3.384411 | 3.489443 | 3.539384 | 0        | 0        | 0        | 9.040984 | 0.490697 | 225.8038 | 6.49E-26 | 1.13E-24 |
| LOC114291258 | 0.793936 | 0.548573 | 0.793028 | 0.032801 | 0        | 0        | 5.815625 | -0.47445 | 90.15267 | 3.51E-15 | 2.55E-14 |

|              |          |          |          |          |          |          |          |          |          |          |          |
|--------------|----------|----------|----------|----------|----------|----------|----------|----------|----------|----------|----------|
| LOC114291245 | 3.032301 | 2.845303 | 3.054072 | 0        | 0        | 0        | 8.192136 | -0.26893 | 122.0075 | 3.02E-18 | 2.82E-17 |
| LOC114291247 | 1.00918  | 0.692454 | 0.900923 | 0.114657 | 0        | 0.021672 | 4.264323 | -0.01647 | 101.5813 | 5.45E-16 | 4.22E-15 |
| LOC114291262 | 3.579006 | 3.794054 | 3.663849 | 0.412575 | 0.549743 | 0.551886 | 2.732453 | 1.882604 | 284.675  | 1.74E-29 | 3.99E-28 |
| LOC114291265 | 0.580529 | 0.608069 | 0.652685 | 0.049084 | 0.173911 | 0.074221 | 2.45221  | -0.14361 | 53.24096 | 1.17E-10 | 5.71E-10 |
| LOC114291284 | 1.074104 | 1.253418 | 1.137247 | 0.67451  | 0.503135 | 0.429454 | 1.025713 | 0.476651 | 20.62591 | 1.74E-05 | 4.88E-05 |
| LOC114291301 | 30.21696 | 29.88869 | 32.74206 | 6.423562 | 6.80997  | 6.577524 | 2.119626 | 4.324837 | 1056.408 | 3.41E-51 | 4.03E-49 |
| LOC114291304 | 15.7209  | 14.77914 | 15.6966  | 5.945715 | 5.315719 | 5.713477 | 1.343037 | 3.900204 | 404.2671 | 7.16E-35 | 2.45E-33 |
| LOC114291614 | 0.12857  | 0.099529 | 0.167752 | 0.409004 | 0.425547 | 0.496986 | -1.85386 | 0.170165 | 54.92354 | 6.86E-11 | 3.41E-10 |
| LOC114291616 | 0.218801 | 0.309394 | 0.329859 | 0.00925  | 0.014566 | 0.02098  | 4.030085 | 0.009878 | 104.6995 | 1.05E-16 | 8.59E-16 |
| LOC114291610 | 5.170111 | 5.040736 | 5.333281 | 1.705419 | 1.984993 | 2.116323 | 1.30147  | 3.390924 | 271.1949 | 9E-29    | 1.94E-27 |
| LOC114291588 | 1.565376 | 1.510809 | 1.197818 | 0.609766 | 0.520118 | 0.461026 | 1.334516 | 0.200807 | 27.05408 | 1.25E-06 | 4.04E-06 |
| LOC114291650 | 0.018202 | 0.061486 | 0.109996 | 0.529409 | 0.403813 | 0.437796 | -2.94579 | -0.17265 | 81.77221 | 3.75E-14 | 2.49E-13 |
| LOC114291622 | 4.092813 | 4.789496 | 3.953507 | 0.292206 | 0.33626  | 0.356883 | 3.576178 | 2.495851 | 561.6341 | 3.07E-40 | 1.57E-38 |
| LOC114291670 | 0.6513   | 0.472611 | 0.747416 | 1.841696 | 1.553667 | 1.631156 | -1.51468 | 1.289457 | 82.79605 | 2.32E-14 | 1.57E-13 |
| LOC114291707 | 4.906344 | 4.952098 | 4.863844 | 1.979062 | 1.88088  | 2.063193 | 1.207601 | 4.421963 | 421.2839 | 1.57E-35 | 5.66E-34 |
| LOC114291744 | 2.349859 | 2.308709 | 2.126261 | 0.083757 | 0.049461 | 0.110821 | 4.659079 | 1.657564 | 420.289  | 1.72E-35 | 6.16E-34 |
| LOC114291745 | 2.463338 | 2.59183  | 2.706572 | 0.807492 | 0.959468 | 0.976832 | 1.380058 | 2.715046 | 169.4069 | 2.55E-22 | 3.31E-21 |
| LOC114291761 | 4.355429 | 3.706665 | 4.507265 | 0.184125 | 0.217461 | 0        | 4.846684 | 0.49138  | 174.2446 | 1.11E-22 | 1.49E-21 |
| LOC114291772 | 1.473866 | 1.341296 | 1.386471 | 2.715926 | 2.962014 | 3.177266 | -1.18533 | 2.723686 | 140.5195 | 5.17E-20 | 5.55E-19 |
| LOC114291835 | 0.680055 | 0.607312 | 0.850268 | 1.023078 | 1.107614 | 1.804876 | -1.01036 | 0.447505 | 20.6727  | 1.74E-05 | 4.88E-05 |
| LOC114291900 | 1.609504 | 1.233369 | 1.571937 | 0.81272  | 0.511927 | 0.67592  | 1.059321 | 0.613592 | 24.08952 | 4.13E-06 | 1.25E-05 |
| LOC114291913 | 0.2841   | 0.287906 | 0.395393 | 0.860737 | 0.501509 | 0.702839 | -1.17631 | 0.724682 | 33.52606 | 1.07E-07 | 3.89E-07 |
| LOC114291909 | 2.961581 | 2.765389 | 2.923321 | 0.175077 | 0.051694 | 0.066185 | 4.846246 | 1.926579 | 502.7267 | 2.12E-38 | 9.49E-37 |
| LOC114291911 | 2.755675 | 2.780507 | 2.870488 | 0.715618 | 0.358561 | 0.393496 | 2.452015 | 0.57554  | 94.54937 | 1.18E-15 | 8.88E-15 |
| LOC114291916 | 1.98277  | 1.557624 | 1.811238 | 0.335286 | 0.313491 | 0.237656 | 2.502938 | 1.489991 | 188.5108 | 1.05E-23 | 1.54E-22 |
| LOC114291972 | 7.54625  | 7.279052 | 7.216047 | 1.217273 | 1.142756 | 1.061935 | 2.586279 | 2.325087 | 356.9115 | 6.49E-33 | 1.89E-31 |

|              |          |          |          |          |          |          |          |          |          |          |          |
|--------------|----------|----------|----------|----------|----------|----------|----------|----------|----------|----------|----------|
| LOC114291992 | 1.576752 | 1.407184 | 1.424454 | 4.670933 | 4.747622 | 4.591016 | -1.76938 | 3.012175 | 372.8037 | 1.36E-33 | 4.16E-32 |
| LOC114291997 | 0.831135 | 0.805272 | 0.998152 | 0.070272 | 0.11066  | 0.053131 | 3.333802 | -0.22116 | 74.99756 | 1.88E-13 | 1.18E-12 |
| LOC114292014 | 0.111606 | 0.125668 | 0.327002 | 1.82591  | 1.384414 | 1.431646 | -3.10119 | -0.45349 | 74.19171 | 2.35E-13 | 1.46E-12 |
| LOC114292034 | 0.113883 | 0.102586 | 0.150154 | 1.0765   | 1.2062   | 1.095647 | -3.27649 | -0.22246 | 99.24945 | 3.79E-16 | 2.96E-15 |
| LOC114292023 | 8.148658 | 7.871257 | 7.248968 | 24.81333 | 23.77024 | 24.04769 | -1.74514 | 4.568451 | 933.1271 | 5.46E-49 | 5.25E-47 |
| LOC114292038 | 20.35971 | 22.35738 | 21.78542 | 42.05023 | 39.12146 | 40.64566 | -1.02209 | 5.080127 | 508.7434 | 1.35E-38 | 6.12E-37 |
| LOC114291984 | 4.002362 | 2.942359 | 3.634349 | 0.96206  | 1.088897 | 0.909231 | 1.731043 | 1.106029 | 81.5409  | 3.23E-14 | 2.16E-13 |
| LOC114292049 | 16.79194 | 17.25003 | 15.89734 | 7.443023 | 7.440715 | 6.955268 | 1.089834 | 3.962929 | 274.7408 | 5.81E-29 | 1.27E-27 |
| LOC114292053 | 1.519103 | 1.244005 | 1.471845 | 0.025104 | 0.019766 | 0.018981 | 5.836871 | 0.751009 | 248.0286 | 1.76E-27 | 3.41E-26 |
| LOC114292067 | 6.309128 | 5.975621 | 6.181333 | 2.753356 | 2.4776   | 2.770422 | 1.103522 | 3.5411   | 225.7458 | 3.74E-26 | 6.64E-25 |
| LOC114292072 | 2.524698 | 1.956338 | 2.296745 | 0.986978 | 0.854825 | 0.59698  | 1.396558 | 0.84614  | 46.48197 | 1.06E-09 | 4.74E-09 |
| LOC114292140 | 4.805923 | 4.423966 | 4.663771 | 9.246459 | 7.983282 | 8.823084 | -1.00544 | 2.537941 | 88.43105 | 5.43E-15 | 3.88E-14 |
| LOC114292164 | 24.76984 | 24.37029 | 24.31344 | 10.92606 | 11.14894 | 9.890812 | 1.097022 | 4.286112 | 319.4315 | 3.27E-31 | 8.51E-30 |
| LOC114292169 | 3.31063  | 3.005033 | 3.303469 | 0        | 0        | 0        | 9.200166 | 0.634271 | 252.7389 | 1.76E-27 | 3.41E-26 |
| LOC114292218 | 10.49872 | 9.345637 | 9.953093 | 19.56332 | 20.10213 | 20.13311 | -1.11014 | 4.880122 | 505.8889 | 1.67E-38 | 7.54E-37 |
| LOC114292229 | 0.085364 | 0.09612  | 0.281379 | 2.017294 | 1.771621 | 2.053174 | -3.7183  | -0.37843 | 99.39802 | 3.65E-16 | 2.86E-15 |
| LOC114292226 | 0.510055 | 0.392956 | 0.383444 | 1.58598  | 1.498497 | 1.770995 | -2.01098 | 1.232205 | 134.3947 | 1.74E-19 | 1.8E-18  |
| LOC114292248 | 0.637231 | 0.62023  | 0.545882 | 1.806277 | 1.839587 | 1.707089 | -1.66901 | 1.763226 | 140.1246 | 5.59E-20 | 5.98E-19 |
| LOC114292261 | 0.009524 | 0.064343 | 0.104643 | 1.644704 | 1.690296 | 1.557661 | -4.88418 | 1.442572 | 432.0309 | 1.16E-33 | 3.59E-32 |
| LOC114292311 | 7.778329 | 7.383519 | 6.790724 | 2.630626 | 2.740113 | 3.190586 | 1.244614 | 3.343541 | 232.2211 | 1.51E-26 | 2.76E-25 |
| LOC114292322 | 2.069829 | 2.068302 | 2.067462 | 0.798123 | 0.679714 | 0.541861 | 1.532975 | 2.222508 | 140.4019 | 5.29E-20 | 5.67E-19 |
| LOC114292370 | 1.624031 | 1.61509  | 1.940688 | 0.129293 | 0.084834 | 0.048877 | 4.22491  | 1.268008 | 287.3795 | 1.26E-29 | 2.91E-28 |
| LOC114292391 | 0.738412 | 0.742998 | 0.845848 | 1.884933 | 2.136252 | 2.116118 | -1.51064 | 1.469231 | 96.98125 | 6.53E-16 | 5.01E-15 |
| LOC114292403 | 1.084571 | 0.594109 | 0.805178 | 1.864986 | 2.181663 | 1.692071 | -1.29414 | 0.548059 | 36.33281 | 3.69E-08 | 1.41E-07 |
| LOC114292420 | 0.038815 | 0.014569 | 0.085296 | 3.363312 | 2.703715 | 3.574284 | -6.15946 | 1.95067  | 716.7172 | 4.05E-43 | 2.55E-41 |
| LOC114292471 | 1.142502 | 1.259653 | 1.281467 | 0.346144 | 0.30661  | 0.163568 | 2.087638 | 0.073132 | 50.83701 | 2.53E-10 | 1.2E-09  |

|              |          |          |          |          |          |          |          |          |          |          |          |
|--------------|----------|----------|----------|----------|----------|----------|----------|----------|----------|----------|----------|
| LOC114292497 | 6.880875 | 6.639106 | 6.387154 | 2.372245 | 2.86966  | 2.771901 | 1.196604 | 3.558949 | 255.4711 | 6.62E-28 | 1.33E-26 |
| LOC114292511 | 8.047176 | 7.952909 | 8.205669 | 16.78574 | 16.61388 | 16.82876 | -1.15833 | 3.711724 | 300.9806 | 2.58E-30 | 6.26E-29 |
| LOC114292531 | 1.549151 | 1.688072 | 2.086466 | 0        | 0        | 0        | 7.779656 | -0.62344 | 89.03867 | 5.69E-15 | 4.06E-14 |
| LOC114292569 | 0.792645 | 0.804728 | 0.913743 | 0.519664 | 0.260378 | 0.357184 | 1.070944 | 0.580806 | 23.61848 | 5E-06    | 1.5E-05  |
| LOC114292553 | 0.874217 | 1.118045 | 0.86567  | 5.061799 | 4.402577 | 4.613255 | -2.40274 | 3.007475 | 582.0309 | 7.75E-41 | 4.13E-39 |
| LOC114292611 | 1.007321 | 1.029772 | 0.983001 | 0.31322  | 0.313016 | 0.409874 | 1.422595 | 1.65849  | 87.99782 | 6.06E-15 | 4.31E-14 |
| LOC114292652 | 0.747293 | 0.643462 | 0.845231 | 0.039954 | 0        | 0.060416 | 4.247673 | -0.63156 | 66.0296  | 2.38E-12 | 1.35E-11 |
| LOC114292697 | 1.038724 | 0.862433 | 0.956839 | 0.190729 | 0.180208 | 0.129784 | 2.419253 | 0.777089 | 109.1973 | 3.74E-17 | 3.17E-16 |
| LOC114292685 | 3.601244 | 3.015251 | 3.043721 | 0.279761 | 0.35244  | 0.507646 | 2.932777 | 0.905779 | 153.6588 | 4.27E-21 | 5.01E-20 |
| LOC114292720 | 0.367092 | 0.359431 | 0.420876 | 0.899415 | 0.571104 | 0.833574 | -1.09221 | 0.183577 | 20.62588 | 1.74E-05 | 4.88E-05 |
| LOC114292715 | 15.38731 | 14.83217 | 16.39436 | 39.83804 | 34.78749 | 38.05095 | -1.37438 | 3.801057 | 425.9431 | 1.05E-35 | 3.82E-34 |
| LOC114292728 | 26.64162 | 23.97931 | 25.10405 | 3.29134  | 3.887236 | 3.495725 | 2.712969 | 3.31957  | 833.5401 | 5.28E-47 | 4.3E-45  |
| LOC114292761 | 20.33548 | 17.83246 | 18.34871 | 0.560095 | 0.7938   | 0.592859 | 4.723581 | 2.26596  | 645.1994 | 1.4E-42  | 8.53E-41 |
| LOC114292779 | 3.701619 | 4.298265 | 3.431635 | 0.946249 | 1.407307 | 0.635938 | 1.820003 | 0.438449 | 52.77962 | 1.35E-10 | 6.58E-10 |
| LOC114292790 | 0.200223 | 0.037575 | 0.256658 | 0.667276 | 1.289596 | 1.146607 | -2.73589 | -0.76066 | 47.71682 | 7.72E-10 | 3.49E-09 |
| LOC114292858 | 0.971508 | 0.848728 | 1.012224 | 1.918271 | 2.733073 | 2.394223 | -1.43197 | 1.601152 | 91.76032 | 2.35E-15 | 1.73E-14 |
| LOC114292873 | 0.42613  | 0.719732 | 1.070187 | 2.157894 | 1.481226 | 1.882521 | -1.41838 | 0.399164 | 36.15546 | 5.27E-08 | 1.99E-07 |
| LOC114292883 | 0        | 0        | 0        | 2.439063 | 2.800637 | 2.612478 | -8.29363 | -0.45556 | 155.7154 | 4.3E-21  | 5.05E-20 |
| LOC114292905 | 2.745977 | 2.413902 | 2.567199 | 7.925413 | 8.929353 | 9.071012 | -1.85442 | 2.838847 | 346.4567 | 1.87E-32 | 5.3E-31  |
| LOC114292971 | 2.341735 | 2.30217  | 2.572962 | 0.993987 | 0.986796 | 1.110947 | 1.110761 | 2.144176 | 77.54781 | 9.39E-14 | 6.02E-13 |
| LOC114292975 | 4.24494  | 4.182319 | 3.37533  | 0.1523   | 0.039972 | 0.153533 | 4.96641  | 1.198227 | 302.9846 | 2.05E-30 | 5.01E-29 |
| LOC114292943 | 0.448606 | 0.411319 | 0.401363 | 0.174747 | 0.220144 | 0.167353 | 1.053739 | 0.606398 | 24.34798 | 3.71E-06 | 1.13E-05 |
| LOC114293016 | 12.92248 | 11.11066 | 13.01005 | 0.586407 | 0.488877 | 0.547686 | 4.40957  | 3.33736  | 1399.416 | 2.89E-56 | 5.02E-54 |
| LOC114293025 | 1.421739 | 1.309807 | 1.318676 | 3.658533 | 3.567723 | 3.781191 | -1.54447 | 2.061338 | 148.1286 | 1.2E-20  | 1.35E-19 |
| LOC114293030 | 0.404089 | 0.650005 | 0.602557 | 4.669712 | 4.544328 | 4.998418 | -3.21116 | 1.491683 | 321.7083 | 2.55E-31 | 6.67E-30 |
| LOC114293023 | 4.304784 | 2.908306 | 4.557851 | 19.63446 | 22.96522 | 20.11608 | -2.51374 | 2.286845 | 362.7459 | 3.63E-33 | 1.08E-31 |

|              |          |          |          |          |          |          |          |          |          |          |          |
|--------------|----------|----------|----------|----------|----------|----------|----------|----------|----------|----------|----------|
| LOC114293045 | 1.958133 | 1.819879 | 1.724601 | 0.904009 | 0.823003 | 0.79029  | 1.031361 | 1.419418 | 42.08972 | 4.76E-09 | 1.99E-08 |
| LOC114293050 | 2.799374 | 2.934703 | 2.845988 | 1.286813 | 1.013194 | 1.105592 | 1.238193 | 1.930322 | 81.87496 | 2.96E-14 | 1.98E-13 |
| LOC114293074 | 2.04622  | 2.119282 | 2.577024 | 0.228093 | 0.400629 | 0.318376 | 2.690014 | 2.024425 | 284.9582 | 2.89E-29 | 6.5E-28  |
| LOC114293084 | 0.55078  | 0.554896 | 0.493688 | 0.316175 | 0.290436 | 0.119525 | 1.069822 | -0.16148 | 13.26271 | 0.000454 | 0.001035 |
| LOC114293091 | 2.590721 | 3.049744 | 2.975921 | 0.071356 | 0.018728 | 0.05395  | 5.785836 | 1.78397  | 509.7426 | 1.25E-38 | 5.71E-37 |
| LOC114293103 | 13.82903 | 13.13256 | 12.50084 | 29.63859 | 28.78727 | 29.67127 | -1.26258 | 4.771588 | 587.1395 | 5.53E-41 | 2.96E-39 |
| LOC114293146 | 0.012138 | 0.013668 | 0.013337 | 0.45234  | 0.486459 | 0.308635 | -4.9896  | 0.112207 | 183.1622 | 2.5E-23  | 3.57E-22 |
| LOC114293145 | 9.60472  | 7.724924 | 8.291726 | 2.973899 | 3.247954 | 3.191384 | 1.335475 | 1.771251 | 83.94769 | 1.72E-14 | 1.17E-13 |
| LOC114293186 | 0.177256 | 0.179631 | 0.116855 | 0.741105 | 0.634262 | 0.511603 | -2.05477 | -0.49849 | 39.3318  | 1.25E-08 | 5.04E-08 |
| LOC114293203 | 1.385017 | 1.138033 | 1.521776 | 0.136093 | 0.053577 | 0.102896 | 3.651112 | -0.5301  | 64.09512 | 4.2E-12  | 2.33E-11 |
| LOC114293218 | 2.790718 | 2.294969 | 2.962921 | 1.482008 | 0.942483 | 1.335983 | 1.008958 | 0.983018 | 28.58475 | 6.85E-07 | 2.28E-06 |
| LOC114293284 | 0.015549 | 0        | 0.017084 | 1.611097 | 1.446562 | 1.688246 | -6.96627 | 0.643966 | 331.223  | 9.18E-32 | 2.47E-30 |
| LOC114293299 | 512.9159 | 489.9498 | 493.2235 | 1633.034 | 1633.009 | 1643.509 | -1.81986 | 9.987305 | 8511.385 | 1.38E-47 | 1.18E-45 |
| LOC114293339 | 0.537139 | 0.584657 | 0.590177 | 0.911328 | 1.076323 | 1.378055 | -1.10143 | 0.570824 | 28.04949 | 8.45E-07 | 2.78E-06 |
| LOC114293368 | 0.456568 | 0.349584 | 0.521716 | 1.593521 | 1.411521 | 1.204813 | -1.74539 | 0.64408  | 68.63549 | 1.12E-12 | 6.53E-12 |
| LOC114293409 | 0.707119 | 0.74825  | 0.711416 | 0.015487 | 0.012194 | 0.046837 | 4.630219 | 0.527172 | 180.2046 | 4.08E-23 | 5.71E-22 |
| LOC114293455 | 1.851954 | 1.661168 | 1.965842 | 4.450656 | 4.357908 | 5.220074 | -1.46394 | 1.672433 | 103.8364 | 1.28E-16 | 1.04E-15 |
| LOC114293461 | 1.086904 | 1.083179 | 1.262861 | 0.522337 | 0.500678 | 0.532288 | 1.032652 | 1.065412 | 32.83364 | 1.35E-07 | 4.85E-07 |
| LOC114293482 | 0.039859 | 0.044881 | 0.109487 | 2.753356 | 2.367575 | 2.383032 | -5.31347 | 0.972326 | 361.5276 | 4.1E-33  | 1.22E-31 |
| LOC114293506 | 2.134244 | 2.918115 | 2.847479 | 1.385598 | 1.527362 | 0.698406 | 1.034225 | 0.293945 | 17.24445 | 7.58E-05 | 0.000194 |
| LOC114293518 | 1.612032 | 1.802179 | 1.923025 | 0.293039 | 0.280171 | 0.205732 | 2.677134 | 1.464162 | 204.2378 | 8.88E-25 | 1.41E-23 |
| LOC114293530 | 12.58292 | 12.39356 | 12.44382 | 3.380321 | 3.295254 | 3.395508 | 1.788151 | 4.730726 | 1036.308 | 7.5E-51  | 8.52E-49 |
| LOC114293528 | 3.004425 | 3.081522 | 2.647406 | 0.757041 | 0.425763 | 0.531492 | 2.270509 | 0.899391 | 107.3642 | 5.68E-17 | 4.74E-16 |
| LOC114293565 | 6.485251 | 3.319263 | 5.974001 | 0        | 0        | 0        | 8.96837  | 0.416646 | 143.9807 | 3.17E-11 | 1.63E-10 |
| LOC114293586 | 0.41385  | 0.611618 | 0.568393 | 1.128459 | 1.14766  | 1.173142 | -1.22627 | 0.045173 | 23.6367  | 4.97E-06 | 1.49E-05 |
| LOC114293608 | 0.593826 | 0.512155 | 0.347054 | 0.321544 | 0.108503 | 0.156285 | 1.276758 | -0.15157 | 17.3804  | 7.58E-05 | 0.000194 |

|              |          |          |          |          |          |          |          |          |          |          |          |
|--------------|----------|----------|----------|----------|----------|----------|----------|----------|----------|----------|----------|
| LOC114293619 | 6.387744 | 5.857507 | 6.537281 | 1.495162 | 1.299551 | 1.424069 | 2.054281 | 3.424492 | 605.2986 | 1.69E-41 | 9.53E-40 |
| LOC114293657 | 2.085878 | 1.509875 | 1.841658 | 0.406259 | 0.746375 | 0.409547 | 1.671474 | 0.067    | 35.14292 | 5.7E-08  | 2.14E-07 |
| LOC114293697 | 2.326196 | 2.29051  | 2.363395 | 0.955418 | 0.459717 | 0.695608 | 1.652982 | 2.24525  | 147.9801 | 1.16E-19 | 1.21E-18 |
| LOC114293758 | 0.810161 | 0.68418  | 0.791251 | 1.595455 | 1.674944 | 1.608367 | -1.19401 | 0.725625 | 37.54625 | 2.38E-08 | 9.29E-08 |
| LOC114293743 | 1.343337 | 0.96256  | 1.039895 | 3.884915 | 4.719371 | 3.734525 | -1.97791 | 1.399475 | 142.3981 | 3.59E-20 | 3.9E-19  |
| LOC114293833 | 0.409765 | 0.390411 | 0.640706 | 0.71623  | 1.150429 | 0.931415 | -1.08589 | 0.498223 | 24.59217 | 3.44E-06 | 1.06E-05 |
| LOC114293834 | 4.39074  | 4.065037 | 4.306125 | 8.602372 | 8.937855 | 8.761392 | -1.14869 | 3.613735 | 273.7648 | 6.55E-29 | 1.43E-27 |
| LOC114293832 | 0.571679 | 0.508191 | 0.396712 | 0.054695 | 0.107663 | 0.206767 | 1.811555 | -0.4722  | 25.80873 | 2.06E-06 | 6.49E-06 |
| LOC114293920 | 2.62461  | 2.007377 | 2.28525  | 5.086142 | 4.004658 | 4.185786 | -1.02637 | 2.058309 | 64.60781 | 3.61E-12 | 2.01E-11 |
| LOC114293946 | 0.467488 | 0.460592 | 0.470844 | 1.239305 | 0.920028 | 1.445659 | -1.46538 | 0.420062 | 42.70812 | 3.84E-09 | 1.62E-08 |
| LOC114293959 | 27.23092 | 24.67427 | 26.87665 | 63.23556 | 60.60372 | 63.49355 | -1.35456 | 5.93658  | 1377.706 | 5.56E-56 | 9.45E-54 |
| LOC114294014 | 0.130335 | 0.190784 | 0.186166 | 1.63479  | 1.492381 | 1.549497 | -3.30969 | 2.02533  | 469.5041 | 2.8E-37  | 1.15E-35 |
| LOC114294036 | 1.39249  | 1.358882 | 1.366788 | 0.337506 | 0.478334 | 0.331732 | 1.721286 | 0.610261 | 57.57194 | 3.01E-11 | 1.54E-10 |
| LOC114294037 | 0.285287 | 0.261002 | 0.352639 | 3.597799 | 3.062472 | 3.504385 | -3.58851 | 1.664063 | 416.1673 | 2.47E-35 | 8.7E-34  |
| LOC114294044 | 0.189519 | 0.128039 | 0.166586 | 2.687188 | 1.953048 | 2.917315 | -4.0061  | 0.120575 | 156.018  | 2.77E-21 | 3.3E-20  |
| LOC114294042 | 1.14368  | 0.895848 | 1.038068 | 2.982922 | 1.921625 | 2.255297 | -1.2855  | 0.108795 | 26.59974 | 1.5E-06  | 4.81E-06 |
| LOC114294050 | 22.6597  | 23.04594 | 22.12149 | 48.01895 | 46.02241 | 46.63006 | -1.15729 | 6.798724 | 1278.646 | 2.05E-39 | 9.93E-38 |
| LOC114294098 | 0.267062 | 0.476126 | 0.317885 | 0.768662 | 1.465267 | 1.529374 | -1.97594 | 0.192916 | 57.21131 | 5.76E-11 | 2.88E-10 |
| LOC114294112 | 1.008783 | 0.936814 | 0.788444 | 0.3781   | 0.364687 | 0.400218 | 1.152367 | 1.933178 | 70.10136 | 7.39E-13 | 4.37E-12 |
| LOC114294110 | 0.351877 | 0.288155 | 0.456917 | 1.017625 | 0.801244 | 0.923275 | -1.41002 | 0.322928 | 37.22988 | 2.66E-08 | 1.04E-07 |
| LOC114294116 | 523.2576 | 517.1729 | 515.8712 | 1539.667 | 1482.197 | 1513.628 | -1.64836 | 11.22824 | 11994.54 | 1.1E-36  | 4.34E-35 |
| LOC114294114 | 4.413491 | 3.88427  | 4.905025 | 0.276653 | 0.217827 | 0.557784 | 3.482478 | 0.610308 | 147.8202 | 1.27E-20 | 1.43E-19 |
| LOC114294156 | 2.386666 | 1.97844  | 1.994901 | 0.133084 | 0.104786 | 0.160993 | 3.86735  | 1.277187 | 273.2049 | 7.02E-29 | 1.53E-27 |
| LOC114294162 | 1.016307 | 1.182504 | 1.209713 | 0.030791 | 0.048488 | 0.04656  | 4.539047 | 0.222605 | 141.7211 | 4.09E-20 | 4.43E-19 |
| LOC114294151 | 0.484461 | 0.685774 | 0.517089 | 0        | 0        | 0.019024 | 5.844857 | -0.44446 | 92.48739 | 1.96E-15 | 1.45E-14 |
| LOC114294197 | 3.92313  | 4.200629 | 3.8345   | 1.225051 | 1.067911 | 1.15778  | 1.689836 | 1.720382 | 123.8806 | 1.51E-18 | 1.44E-17 |

|              |          |          |          |          |          |          |          |          |          |          |          |
|--------------|----------|----------|----------|----------|----------|----------|----------|----------|----------|----------|----------|
| LOC114294235 | 0.072263 | 0.016273 | 0.031759 | 0.604258 | 0.517144 | 0.417134 | -3.64561 | -0.72532 | 73.83555 | 2.59E-13 | 1.6E-12  |
| LOC114294264 | 0.494262 | 0.630743 | 0.343942 | 0.958378 | 1.155473 | 1.38127  | -1.37355 | 0.651759 | 43.15855 | 3.37E-09 | 1.43E-08 |
| LOC114294280 | 2.017189 | 1.851306 | 1.502881 | 0        | 0        | 0        | 9.651152 | 1.049447 | 333.1263 | 3.07E-31 | 8E-30    |
| LOC114294302 | 2.786065 | 2.187716 | 2.215317 | 0        | 0.052469 | 0        | 6.542441 | 0.158775 | 158.9206 | 1.63E-21 | 1.98E-20 |
| LOC114294304 | 3.106271 | 3.288393 | 2.625377 | 0        | 0        | 0        | 9.453648 | 0.868785 | 295.4859 | 9.9E-30  | 2.3E-28  |
| LOC114294351 | 1.066914 | 1.26295  | 1.006944 | 0.596757 | 0.430711 | 0.488789 | 1.045696 | 0.902121 | 29.05093 | 5.71E-07 | 1.92E-06 |
| LOC114294338 | 26.46222 | 22.92031 | 25.92001 | 48.92954 | 46.79766 | 48.70938 | -1.04459 | 5.941591 | 783.336  | 1.29E-43 | 8.4E-42  |
| LOC114294353 | 4.288374 | 3.793979 | 4.375258 | 0.696027 | 0.657634 | 0.684118 | 2.50019  | 1.003671 | 137.0649 | 1.02E-19 | 1.07E-18 |
| LOC114294364 | 3.878228 | 4.444166 | 3.921786 | 21.39933 | 21.51578 | 22.17001 | -2.51839 | 3.532486 | 1012.916 | 1.91E-50 | 2.08E-48 |
| LOC114294395 | 0.717464 | 1.367153 | 0.848947 | 2.106819 | 2.132793 | 2.806542 | -1.39092 | -0.05724 | 26.73678 | 1.42E-06 | 4.56E-06 |
| LOC114294413 | 1.03753  | 1.092066 | 1.016067 | 0.615015 | 0.548807 | 0.309996 | 1.015607 | 0.159197 | 15.74861 | 0.000146 | 0.000359 |
| LOC114294432 | 0.366206 | 0.250353 | 0.301774 | 0.97477  | 0.973416 | 1.150429 | -1.85012 | 0.668495 | 78.91606 | 6.49E-14 | 4.22E-13 |
| LOC114294449 | 17.14293 | 17.87426 | 18.85149 | 8.780094 | 7.511603 | 8.322724 | 1.027892 | 4.760674 | 359.2929 | 5.11E-33 | 1.51E-31 |
| LOC114294482 | 53.09541 | 50.31337 | 50.31647 | 129.2857 | 128.7236 | 127.3721 | -1.43138 | 7.734489 | 2312.779 | 9.8E-42  | 5.61E-40 |
| LOC114294487 | 3.608578 | 3.895694 | 4.046646 | 11.69935 | 11.02206 | 11.96447 | -1.6924  | 2.667838 | 261.5789 | 3.02E-28 | 6.26E-27 |
| LOC114294498 | 1.512075 | 1.337751 | 1.157032 | 0.049084 | 0.231881 | 0.074221 | 3.298791 | -0.1081  | 78.35335 | 7.55E-14 | 4.87E-13 |
| LOC114294501 | 2.192624 | 2.582141 | 2.674352 | 0.47537  | 0.54704  | 0.38706  | 2.289339 | 1.207236 | 135.7503 | 1.33E-19 | 1.38E-18 |
| LOC114294522 | 0.165859 | 0.178267 | 0.190519 | 1.438983 | 1.294865 | 1.440267 | -3.06258 | 1.675061 | 348.9688 | 1.45E-32 | 4.12E-31 |
| LOC114294536 | 1.820693 | 1.957957 | 2.09038  | 0.371876 | 0.292802 | 0.39363  | 2.356465 | 0.851564 | 111.9166 | 2.03E-17 | 1.76E-16 |
| LOC114294588 | 1.766197 | 1.461111 | 1.980199 | 3.996908 | 4.488389 | 4.409062 | -1.41541 | 1.369219 | 79.48797 | 5.57E-14 | 3.65E-13 |
| LOC114294575 | 0.851386 | 0.675776 | 0.828106 | 0.279088 | 0.099884 | 0.249375 | 1.825682 | 0.231416 | 45.27809 | 1.6E-09  | 6.99E-09 |
| LOC114294576 | 4.562491 | 4.045561 | 4.368825 | 0.91546  | 0.677769 | 1.146699 | 2.134059 | 3.382126 | 522.9701 | 1.05E-30 | 2.64E-29 |
| LOC114294578 | 1.753049 | 1.227037 | 1.483654 | 0        | 0        | 0        | 8.612068 | 0.098686 | 160.7335 | 1.76E-21 | 2.13E-20 |
| LOC114294629 | 5.281429 | 5.484343 | 5.190396 | 1.546779 | 1.091894 | 1.371106 | 1.898352 | 1.804626 | 156.531  | 2.52E-21 | 3.01E-20 |
| LOC114294656 | 1.787207 | 1.764966 | 1.851009 | 3.195564 | 3.103166 | 3.80531  | -1.0133  | 2.434524 | 82.58722 | 2.45E-14 | 1.65E-13 |
| LOC114294692 | 9.461839 | 7.487758 | 8.934816 | 0.69076  | 0.543882 | 0.887847 | 3.487531 | 1.916253 | 375.8921 | 1.01E-33 | 3.12E-32 |

|              |          |          |          |          |          |          |          |          |          |          |          |
|--------------|----------|----------|----------|----------|----------|----------|----------|----------|----------|----------|----------|
| LOC114294675 | 0.09615  | 0.102852 | 0.068669 | 0.201002 | 0.206429 | 0.165186 | -1.18649 | -0.10429 | 19.67435 | 2.61E-05 | 7.16E-05 |
| LOC114294691 | 4.982703 | 4.167809 | 5.683264 | 10.00656 | 12.08993 | 12.32681 | -1.32823 | 2.408929 | 130.6327 | 3.73E-19 | 3.73E-18 |
| LOC114294681 | 1.284326 | 0.813458 | 0.846685 | 0.175101 | 0.091912 | 0.242712 | 2.415326 | 0.253606 | 67.6344  | 2.19E-12 | 1.24E-11 |
| LOC114294717 | 3.666208 | 3.068512 | 2.455704 | 0.071278 | 0        | 0.026946 | 6.450694 | 1.315012 | 345.4259 | 3.19E-29 | 7.13E-28 |
| LOC114294715 | 16.79942 | 15.69274 | 16.38892 | 66.34901 | 70.7868  | 71.90759 | -2.20251 | 5.136103 | 2278.621 | 2.99E-65 | 1.07E-62 |
| LOC114294750 | 1.90546  | 1.47123  | 1.585161 | 0.692757 | 0.662337 | 0.598597 | 1.248312 | 0.455505 | 29.40969 | 4.97E-07 | 1.68E-06 |
| LOC114294757 | 0.806187 | 0.78673  | 0.64958  | 0.0977   | 0        | 0.024623 | 4.16377  | -0.36622 | 78.46472 | 7.33E-14 | 4.73E-13 |
| LOC114294776 | 1.936887 | 1.467934 | 1.821195 | 4.367288 | 5.038031 | 5.605677 | -1.63182 | 2.475951 | 198.4359 | 2.17E-24 | 3.35E-23 |
| LOC114294789 | 1.041698 | 0.917034 | 0.874026 | 1.96248  | 1.5723   | 1.822176 | -1.00956 | 1.155672 | 36.09154 | 4.03E-08 | 1.54E-07 |
| LOC114294814 | 3.466544 | 3.670554 | 3.896195 | 8.989837 | 9.581873 | 9.550689 | -1.46022 | 3.652655 | 432.8463 | 5.79E-36 | 2.16E-34 |
| LOC114294804 | 16.39376 | 14.94218 | 15.50018 | 3.414303 | 4.850642 | 3.226814 | 1.913869 | 3.829094 | 414.1791 | 1.42E-15 | 1.06E-14 |
| LOC114294808 | 1.388834 | 1.563824 | 1.572211 | 4.590277 | 3.132332 | 4.338212 | -1.5077  | 1.017673 | 67.91238 | 1.38E-12 | 7.97E-12 |
| LOC114294820 | 1.635638 | 1.496402 | 1.399699 | 3.144835 | 3.072661 | 3.469301 | -1.20092 | 3.205024 | 211.9697 | 2.77E-25 | 4.63E-24 |
| LOC114294823 | 1.262461 | 1.025364 | 1.227941 | 0.413839 | 0.118488 | 0.48356  | 1.69492  | 0.262398 | 39.4877  | 1.4E-08  | 5.62E-08 |
| LOC114294829 | 16.62668 | 18.67877 | 16.72168 | 4.288122 | 4.46546  | 4.18338  | 1.899354 | 3.097291 | 394.2818 | 1.78E-34 | 5.9E-33  |
| LOC114294870 | 49.31741 | 47.47836 | 45.88062 | 20.25921 | 19.12647 | 20.75651 | 1.141466 | 5.825749 | 900.6246 | 2.31E-48 | 2.09E-46 |
| LOC114294901 | 0.516778 | 0.511662 | 0.587385 | 0.226754 | 0.153033 | 0.244917 | 1.264487 | 0.440113 | 29.58081 | 4.65E-07 | 1.58E-06 |
| LOC114294900 | 0.409631 | 0.533313 | 0.506339 | 0.162889 | 0.09161  | 0.105562 | 1.919695 | -0.30747 | 33.12605 | 1.21E-07 | 4.37E-07 |
| LOC114294933 | 2.266678 | 2.802498 | 2.343994 | 0.161585 | 0.127227 | 0.122169 | 4.019164 | 0.000329 | 107.4121 | 5.62E-17 | 4.69E-16 |
| LOC114294956 | 31.82351 | 31.12965 | 33.21403 | 68.80493 | 63.85037 | 64.55553 | -1.14042 | 5.549191 | 817.2498 | 1.17E-46 | 9.29E-45 |
| LOC114295033 | 1.420084 | 1.189508 | 1.350996 | 0.125925 | 0.123936 | 0.095208 | 3.402555 | 0.448006 | 131.2607 | 3.28E-19 | 3.3E-18  |
| LOC114295114 | 3.742184 | 3.732126 | 3.759262 | 1.241748 | 1.377297 | 1.44501  | 1.351968 | 3.685669 | 358.7803 | 5.38E-33 | 1.58E-31 |
| LOC114295127 | 0.74634  | 0.840377 | 0.492021 | 0.135671 | 0.427292 | 0.205154 | 1.277981 | -0.20728 | 16.69793 | 0.000103 | 0.00026  |
| LOC114295146 | 6.232969 | 6.664869 | 6.232557 | 14.14265 | 13.60643 | 14.72961 | -1.25754 | 3.808354 | 369.1205 | 1.94E-33 | 5.89E-32 |
| LOC114295139 | 21.56103 | 19.33764 | 21.37492 | 41.39779 | 41.64257 | 42.76424 | -1.11982 | 5.051441 | 605.6169 | 1.66E-41 | 9.35E-40 |
| LOC114295200 | 0.456091 | 0.602102 | 0.604808 | 1.257934 | 1.598234 | 1.513091 | -1.51629 | 0.987697 | 68.30688 | 1.23E-12 | 7.14E-12 |



|              |          |          |          |          |          |          |          |          |          |          |          |
|--------------|----------|----------|----------|----------|----------|----------|----------|----------|----------|----------|----------|
| LOC114295183 | 0        | 0        | 0        | 0.320698 | 0.285088 | 0.312865 | -8.483   | -0.27149 | 179.2251 | 7.51E-23 | 1.03E-21 |
| LOC114295184 | 2.180713 | 2.053672 | 2.483169 | 0.648679 | 0.283749 | 0.762916 | 1.877755 | 0.223461 | 47.48764 | 7.61E-10 | 3.44E-09 |
| LOC114295192 | 17.28825 | 14.005   | 16.09986 | 32.44519 | 33.16276 | 33.85674 | -1.17494 | 5.875906 | 585.2624 | 7.58E-17 | 6.26E-16 |
| LOC114295264 | 3.670674 | 3.996613 | 3.757734 | 0.073487 | 0.069434 | 0.133347 | 5.214955 | 2.85534  | 1045.461 | 5.23E-51 | 6.11E-49 |
| LOC114295242 | 2.475833 | 2.45765  | 2.684507 | 4.619059 | 5.12895  | 4.880308 | -1.05076 | 1.808108 | 61.24296 | 9.82E-12 | 5.27E-11 |
| LOC114295228 | 0.929377 | 0.956595 | 0.82694  | 0.476775 | 0.359075 | 0.344802 | 1.11604  | 1.808309 | 60.67697 | 1.16E-11 | 6.21E-11 |
| LOC114295251 | 1.237788 | 1.007907 | 1.044979 | 0.038137 | 0        | 0.038446 | 5.308578 | 1.335358 | 336.7384 | 3.45E-31 | 8.94E-30 |
| LOC114295247 | 1.95796  | 1.72071  | 2.413646 | 6.076721 | 4.989661 | 5.185137 | -1.50638 | 1.262549 | 81.33245 | 3.41E-14 | 2.28E-13 |
| LOC114295260 | 0.675199 | 0.74801  | 0.813663 | 1.484748 | 1.589895 | 1.631473 | -1.1857  | 1.70968  | 72.04035 | 4.28E-13 | 2.59E-12 |
| LOC114295267 | 0.790214 | 0.83046  | 0.694593 | 0        | 0        | 0        | 8.504707 | 0.007754 | 151.7505 | 8.85E-21 | 1.01E-19 |
| LOC114295269 | 6.331076 | 6.740351 | 6.666375 | 0        | 0.087131 | 0.055778 | 6.81312  | 2.310019 | 777.6969 | 8.56E-46 | 6.4E-44  |
| LOC114295266 | 5.094308 | 4.550843 | 4.791809 | 0.034172 | 0.053811 | 0.051672 | 6.474618 | 1.986531 | 639.1523 | 2.02E-42 | 1.21E-40 |
| LOC114295285 | 0.660279 | 0.613365 | 0.689202 | 0.015003 | 0        | 0        | 6.813803 | 0.406287 | 197.432  | 2.54E-24 | 3.89E-23 |
| LOC114295289 | 0.870281 | 1.156867 | 0.996057 | 0.043945 | 0.034601 | 0.049838 | 4.388207 | 0.512936 | 169.6339 | 2.45E-22 | 3.19E-21 |
| LOC114295302 | 0.315534 | 0.322991 | 0.378208 | 1.199313 | 1.27275  | 1.261585 | -1.98121 | 0.772448 | 96.97178 | 6.54E-16 | 5.02E-15 |
| LOC114295330 | 6.23176  | 5.952411 | 6.130198 | 1.815421 | 1.982103 | 1.811812 | 1.598671 | 3.171051 | 327.0701 | 1.43E-31 | 3.8E-30  |
| LOC114295333 | 4.707024 | 5.348136 | 4.109319 | 0.051701 | 0.081415 | 0.117269 | 5.633143 | 2.358475 | 709.916  | 3.86E-43 | 2.43E-41 |
| LOC114295355 | 1.733843 | 1.681372 | 1.796186 | 0.321614 | 0.354519 | 0.398787 | 2.156367 | 2.176451 | 247.566  | 1.87E-27 | 3.62E-26 |
| LOC114295359 | 4.5833   | 4.583086 | 3.720526 | 9.388618 | 8.763037 | 10.10706 | -1.23655 | 2.618985 | 136.0698 | 1.24E-19 | 1.3E-18  |
| LOC114295394 | 0.670875 | 0.650487 | 0.491413 | 0.203255 | 0.266727 | 0.179288 | 1.364898 | -0.39634 | 17.65136 | 6.28E-05 | 0.000163 |
| LOC114295424 | 0.195672 | 0.264391 | 0.358322 | 1.351648 | 1.120255 | 1.129513 | -2.23419 | 0.79579  | 114.2603 | 1.21E-17 | 1.06E-16 |
| LOC114295441 | 60.99246 | 59.92495 | 65.24991 | 23.3145  | 22.21389 | 25.07006 | 1.292516 | 5.618148 | 1003.012 | 2.86E-50 | 3.03E-48 |
| LOC114295451 | 1.686285 | 1.643459 | 1.751589 | 0        | 0        | 0.04869  | 6.374907 | 1.892027 | 525.6221 | 4.41E-36 | 1.67E-34 |
| LOC114295536 | 2.227338 | 1.886165 | 2.427044 | 0.903474 | 0.974834 | 0.936086 | 1.106409 | 1.399008 | 46.61012 | 1.02E-09 | 4.55E-09 |
| LOC114295488 | 1.18349  | 1.605963 | 1.500404 | 4.192422 | 3.431274 | 3.002934 | -1.40083 | 1.332261 | 72.13027 | 4.17E-13 | 2.53E-12 |
| LOC114295518 | 0.118086 | 0.193404 | 0.153337 | 0.800096 | 0.645334 | 0.91477  | -2.45075 | 0.440083 | 103.5261 | 1.38E-16 | 1.12E-15 |

|              |          |          |          |          |          |          |          |          |          |          |          |
|--------------|----------|----------|----------|----------|----------|----------|----------|----------|----------|----------|----------|
| LOC114295542 | 0.032861 | 0.111004 | 0.144423 | 31.7792  | 28.64346 | 31.47936 | -8.37343 | 3.859798 | 3471.327 | 3.8E-73  | 2.24E-70 |
| LOC114295599 | 0.269244 | 0.262199 | 0.31182  | 1.005331 | 0.99987  | 0.870115 | -1.86679 | 1.388913 | 132.2664 | 2.67E-19 | 2.71E-18 |
| LOC114295638 | 17.43599 | 17.50791 | 16.99396 | 2.759374 | 3.141518 | 3.439541 | 2.356144 | 3.88917  | 1008.488 | 2.29E-50 | 2.44E-48 |
| LOC114295687 | 7.07651  | 7.004953 | 6.066409 | 0.848165 | 0.723468 | 0.534393 | 3.169717 | 1.568468 | 270.9914 | 9.23E-29 | 1.99E-27 |
| LOC114295689 | 2.98196  | 3.26932  | 3.578178 | 0.142649 | 0.056159 | 0.323558 | 4.044229 | 0.528156 | 157.7063 | 2.03E-21 | 2.45E-20 |
| LOC114295713 | 1.321731 | 1.410521 | 1.257164 | 5.934955 | 5.421226 | 6.114033 | -2.23485 | 3.479436 | 801.2394 | 2.59E-46 | 2.03E-44 |
| LOC114295732 | 0.503706 | 0.934166 | 0.765054 | 0.215447 | 0.148431 | 0.142531 | 2.0189   | 0.026093 | 43.51102 | 3.17E-09 | 1.35E-08 |
| LOC114295718 | 17.9893  | 18.91403 | 18.39385 | 8.046383 | 8.041151 | 8.423483 | 1.064701 | 2.827163 | 117.846  | 5.5E-18  | 5E-17    |
| LOC114295723 | 1.170757 | 0.993773 | 1.28636  | 0.425645 | 0.412479 | 0.495104 | 1.256343 | 0.515535 | 31.20124 | 2.5E-07  | 8.71E-07 |
| LOC114295715 | 0.466419 | 0.477442 | 0.714358 | 1.515882 | 1.618379 | 1.534625 | -1.60259 | 1.202891 | 86.43521 | 9.03E-15 | 6.31E-14 |
| LOC114295785 | 3.532892 | 3.276023 | 2.663936 | 0        | 0        | 0        | 8.147421 | -0.30902 | 116.1553 | 1.05E-17 | 9.32E-17 |
| LOC114295771 | 3.673994 | 3.985095 | 3.55532  | 8.516829 | 9.214534 | 8.801943 | -1.35079 | 2.517465 | 152.1082 | 5.69E-21 | 6.59E-20 |
| LOC114295813 | 1.316694 | 0.593038 | 1.322703 | 0.478703 | 0.592294 | 0.413638 | 1.021358 | -0.47085 | 9.349997 | 0.002958 | 0.005895 |
| LOC114295824 | 0.627781 | 0.633754 | 0.618414 | 3.016949 | 2.695613 | 3.163681 | -2.34207 | 2.933173 | 549.7137 | 7.01E-40 | 3.49E-38 |
| LOC114295859 | 0.375729 | 0.42307  | 0.288981 | 1.57092  | 1.613334 | 1.755768 | -2.27576 | -0.24023 | 57.89054 | 2.73E-11 | 1.41E-10 |
| LOC114295860 | 92.32317 | 86.03873 | 86.50571 | 260.8099 | 261.9578 | 263.2091 | -1.67462 | 7.341462 | 2861.543 | 1.35E-63 | 4.16E-61 |
| LOC114295855 | 7.512071 | 8.074822 | 6.927597 | 0.25814  | 0.528452 | 0.195172 | 4.39054  | 3.045142 | 863.3995 | 3.11E-31 | 8.1E-30  |
| LOC114295876 | 24.66937 | 25.77533 | 23.33966 | 3.702757 | 4.581385 | 5.3769   | 2.305408 | 3.748147 | 824.0262 | 1.49E-43 | 9.61E-42 |
| LOC114295899 | 4.059123 | 4.300382 | 4.481898 | 1.999172 | 1.516841 | 1.923744 | 1.139425 | 2.21744  | 83.3673  | 2E-14    | 1.36E-13 |
| LOC114295918 | 2.941602 | 2.88811  | 2.325508 | 1.108588 | 1.0269   | 0.986082 | 1.28709  | 1.695011 | 73.41616 | 2.91E-13 | 1.79E-12 |
| LOC114295961 | 0.838335 | 1.206175 | 1.484017 | 3.386541 | 2.533126 | 2.752496 | -1.39251 | 0.442042 | 38.55675 | 1.65E-08 | 6.57E-08 |
| LOC114295982 | 8.887786 | 9.050722 | 9.551398 | 17.95872 | 17.68778 | 18.00672 | -1.07058 | 4.543498 | 377.1163 | 8.97E-34 | 2.79E-32 |
| LOC114296035 | 0.043587 | 0.03272  | 0.063855 | 0.977223 | 0.395114 | 0.579098 | -3.78692 | -0.44289 | 88.34644 | 1.34E-14 | 9.25E-14 |
| LOC114296048 | 0.270145 | 0.304183 | 0.215869 | 1.071439 | 0.984217 | 1.046356 | -2.05947 | -0.25677 | 48.51546 | 5.41E-10 | 2.48E-09 |
| LOC114296059 | 0.650675 | 0.732659 | 0.730811 | 0.289132 | 0.310435 | 0.357715 | 1.017022 | 0.213562 | 17.06303 | 8.14E-05 | 0.000207 |
| LOC114296082 | 0.176013 | 0.039638 | 0.193393 | 1.599804 | 1.108476 | 1.257946 | -3.28811 | -0.61625 | 70.71328 | 6.21E-13 | 3.7E-12  |

|              |          |          |          |          |          |          |          |          |          |          |          |
|--------------|----------|----------|----------|----------|----------|----------|----------|----------|----------|----------|----------|
| LOC114296089 | 7.615854 | 7.677646 | 7.552217 | 22.39072 | 24.12278 | 24.18421 | -1.73782 | 4.121945 | 753.2611 | 3.06E-45 | 2.19E-43 |
| LOC114296107 | 1.397319 | 1.436563 | 1.579794 | 3.902146 | 3.999942 | 4.035781 | -1.54262 | 2.047289 | 146.0362 | 1.78E-20 | 1.98E-19 |
| LOC114296103 | 2.607014 | 3.036716 | 2.607624 | 0        | 0        | 0        | 9.884338 | 1.271084 | 402.7164 | 2.04E-34 | 6.71E-33 |
| LOC114296179 | 0.479034 | 0.505144 | 0.668361 | 0        | 0.010883 | 0.010451 | 5.855323 | 0.29438  | 167.2471 | 3.71E-22 | 4.76E-21 |
| LOC114296171 | 7.744452 | 6.949962 | 6.685763 | 16.93598 | 16.16847 | 17.44651 | -1.34346 | 3.655868 | 369.046  | 1.96E-33 | 5.92E-32 |
| LOC114296210 | 35.09002 | 35.59504 | 37.03867 | 15.35812 | 15.09543 | 14.80506 | 1.146015 | 5.75284  | 897.5409 | 2.65E-48 | 2.38E-46 |
| LOC114296197 | 2.334589 | 2.580061 | 2.3276   | 0.07859  | 0        | 0.05942  | 5.482619 | -0.03393 | 128.4    | 5.89E-19 | 5.82E-18 |
| LOC114296229 | 133.8131 | 125.9804 | 133.5229 | 8.70402  | 8.452346 | 9.344802 | 3.783625 | 6.004342 | 7842.281 | 1.2E-88  | 4.79E-85 |
| LOC114296228 | 0.277408 | 0.429497 | 0.2286   | 26.97892 | 27.04919 | 26.06934 | -6.50858 | 3.594951 | 2691.317 | 2.32E-68 | 9.84E-66 |
| LOC114296213 | 139.1779 | 138.4195 | 136.4242 | 406.3771 | 394.3729 | 400.2041 | -1.64156 | 7.872639 | 3194.57  | 8.5E-52  | 1.06E-49 |
| LOC114296214 | 446.5883 | 427.9381 | 436.482  | 1110.309 | 1104.449 | 1119.588 | -1.45219 | 9.379015 | 4439.171 | 2.55E-33 | 7.68E-32 |
| LOC114296221 | 51.78607 | 46.05724 | 50.05508 | 209.9001 | 208.2907 | 211.5644 | -2.19552 | 6.734172 | 4095.639 | 2.84E-76 | 2.22E-73 |
| LOC114296219 | 184.2577 | 174.4085 | 182.0415 | 1193.993 | 1165.354 | 1194.666 | -2.82198 | 9.240992 | 14342.13 | 3.2E-100 | 1E-95    |
| LOC114296245 | 6.897267 | 6.369319 | 7.716943 | 2.637567 | 2.498098 | 2.745617 | 1.305572 | 2.790573 | 161.0602 | 1.11E-21 | 1.37E-20 |
| LOC114296289 | 0.806492 | 0.825553 | 1.127798 | 4.531456 | 4.82718  | 4.030702 | -2.3707  | 0.191137 | 84.17106 | 1.62E-14 | 1.11E-13 |
| LOC114296308 | 0.216476 | 0.146251 | 0.190281 | 3.305527 | 2.664629 | 3.510793 | -4.14229 | 0.245437 | 179.4682 | 4.61E-23 | 6.41E-22 |
| LOC114296306 | 2.291367 | 2.027848 | 2.111268 | 4.048376 | 4.338297 | 4.099556 | -1.06201 | 3.583183 | 225.6484 | 3.8E-26  | 6.72E-25 |
| LOC114296316 | 0.532097 | 0.473005 | 0.553867 | 0.814532 | 0.962003 | 1.462628 | -1.18229 | -0.11815 | 19.08987 | 3.36E-05 | 9.05E-05 |
| LOC114296331 | 8.169364 | 8.270748 | 7.716229 | 0.260534 | 0.410272 | 0.246227 | 4.578192 | 1.845574 | 475.0669 | 1.8E-37  | 7.56E-36 |
| LOC114296361 | 1.026695 | 1.156056 | 1.184476 | 0.093317 | 0.110212 | 0.070554 | 3.461842 | -0.27832 | 75.23429 | 1.76E-13 | 1.1E-12  |
| LOC114296388 | 0.484721 | 0.242575 | 0.502995 | 1.027992 | 1.002122 | 0.777234 | -1.26226 | -0.31449 | 18.46477 | 4.41E-05 | 0.000117 |
| LOC114296400 | 3.206424 | 3.183386 | 3.447268 | 1.441508 | 1.381733 | 1.468969 | 1.08765  | 1.101894 | 37.38643 | 2.52E-08 | 9.82E-08 |
| LOC114296411 | 7.0499   | 6.829599 | 6.973349 | 2.748453 | 2.717631 | 3.068707 | 1.17844  | 3.071441 | 174.4088 | 1.08E-22 | 1.45E-21 |
| LOC114296412 | 2.250986 | 1.817264 | 2.029934 | 10.19113 | 8.814407 | 9.748248 | -2.33138 | 3.071865 | 605.1396 | 1.71E-41 | 9.61E-40 |
| LOC114296420 | 0.973731 | 1.135576 | 1.184508 | 3.603354 | 3.534006 | 3.417433 | -1.78568 | 2.027031 | 184.9236 | 1.87E-23 | 2.7E-22  |
| LOC114296451 | 0.480215 | 0.353548 | 0.527632 | 0.06715  | 0.039654 | 0.025385 | 3.286969 | -0.11371 | 78.46291 | 7.33E-14 | 4.74E-13 |

|              |          |          |          |          |          |          |          |          |          |          |          |
|--------------|----------|----------|----------|----------|----------|----------|----------|----------|----------|----------|----------|
| LOC114296445 | 2.671935 | 2.484875 | 2.750922 | 1.043377 | 0.835684 | 1.183299 | 1.261888 | 2.488768 | 117.3153 | 6.17E-18 | 5.59E-17 |
| LOC114296447 | 0.017509 | 0.009858 | 0.019238 | 0.50926  | 0.513748 | 0.589587 | -5.09372 | -0.03665 | 175.4818 | 9.01E-23 | 1.22E-21 |
| LOC114296487 | 401.7136 | 385.2291 | 424.825  | 777.7943 | 784.1887 | 829.0741 | -1.08616 | 8.848108 | 1830.812 | 4.55E-21 | 5.32E-20 |
| LOC114296482 | 1.603233 | 2.215518 | 2.442133 | 4.769003 | 4.745843 | 4.306807 | -1.25158 | 1.499761 | 66.26838 | 2.22E-12 | 1.26E-11 |
| LOC114296513 | 10.25341 | 8.468446 | 10.79758 | 23.60619 | 22.53371 | 25.84159 | -1.39089 | 4.368142 | 491.6847 | 1.53E-33 | 4.68E-32 |
| LOC114296616 | 2.113768 | 2.232495 | 2.358493 | 0.148932 | 0.070359 | 0.180165 | 3.942242 | 1.190917 | 259.4968 | 3.94E-28 | 8.05E-27 |
| LOC114296731 | 5.533898 | 6.59502  | 6.035943 | 12.70305 | 11.44732 | 12.54677 | -1.12022 | 2.792206 | 131.103  | 3.39E-19 | 3.41E-18 |
| LOC114296765 | 14.7274  | 15.93346 | 15.17492 | 5.860184 | 5.828352 | 4.943737 | 1.362004 | 3.207406 | 245.666  | 2.41E-27 | 4.64E-26 |
| LOC114296809 | 0.9478   | 1.324825 | 1.202981 | 0.445585 | 0.537953 | 0.494111 | 1.10674  | 0.691315 | 27.49964 | 1.05E-06 | 3.42E-06 |
| LOC114296810 | 1.665551 | 1.556189 | 2.154481 | 0.257674 | 0.287419 | 0.19482  | 2.753749 | 1.42919  | 198.0479 | 2.31E-24 | 3.54E-23 |
| LOC114296883 | 0.460757 | 0.622573 | 0.742504 | 1.619309 | 1.36292  | 1.435398 | -1.37378 | 0.093871 | 30.02643 | 3.92E-07 | 1.34E-06 |
| LOC114296902 | 2.320264 | 2.241789 | 2.631608 | 0.897989 | 1.028431 | 1.110996 | 1.123254 | 1.811324 | 63.32532 | 5.27E-12 | 2.9E-11  |
| LOC114296948 | 10.01027 | 7.629969 | 9.588614 | 20.80978 | 20.20562 | 22.57742 | -1.32604 | 3.174328 | 240.6308 | 4.74E-27 | 8.93E-26 |
| LOC114296964 | 15.09929 | 15.6338  | 14.89782 | 4.929563 | 5.371819 | 5.456464 | 1.421421 | 3.819635 | 430.9401 | 6.82E-36 | 2.53E-34 |
| LOC114297010 | 35.92086 | 33.70976 | 34.25638 | 79.29855 | 79.75122 | 79.69112 | -1.30576 | 6.327056 | 1460.714 | 4.78E-57 | 8.99E-55 |
| LOC114297044 | 0.531199 | 0.407815 | 0.371414 | 25.58908 | 21.53034 | 23.32938 | -5.82622 | 3.941878 | 3090.772 | 2.15E-70 | 1.01E-67 |
| LOC114297046 | 0.207103 | 0        | 0.056888 | 15.34141 | 14.74713 | 14.65908 | -7.31277 | 2.155995 | 900.3084 | 2.34E-48 | 2.12E-46 |
| LOC114297066 | 0.80051  | 0.836989 | 1.06803  | 2.910369 | 3.35545  | 2.671965 | -1.82399 | 0.092762 | 50.60808 | 2.73E-10 | 1.29E-09 |
| LOC114297081 | 0.588424 | 0.557948 | 0.493401 | 0.197041 | 0.26596  | 0.191541 | 1.205601 | -0.25285 | 16.09018 | 0.000125 | 0.000311 |
| LOC114297087 | 1.130006 | 0.848256 | 1.053466 | 2.24089  | 2.15649  | 1.929584 | -1.14906 | 0.510592 | 29.50372 | 4.79E-07 | 1.62E-06 |
| LOC114297089 | 131.5253 | 122.5568 | 127.008  | 48.97779 | 50.87785 | 49.67592 | 1.243625 | 6.995815 | 1509.71  | 1.12E-41 | 6.36E-40 |
| LOC114297101 | 0.679972 | 0.483566 | 0.747113 | 0.130112 | 0.128058 | 0.245935 | 1.772498 | -0.35827 | 27.70512 | 9.68E-07 | 3.17E-06 |
| LOC114297107 | 2.752076 | 2.706574 | 3.100373 | 46.16492 | 42.93036 | 47.16096 | -4.09607 | 4.425326 | 3191.845 | 1.45E-71 | 7.33E-69 |
| LOC114297125 | 18.40701 | 16.40495 | 19.3656  | 37.85318 | 33.56801 | 37.31298 | -1.10591 | 3.544898 | 234.0863 | 1.16E-26 | 2.14E-25 |
| LOC114297140 | 0.917413 | 0.821107 | 0.801231 | 0        | 0        | 0.032331 | 5.681402 | -0.58891 | 83.36323 | 2E-14    | 1.36E-13 |
| LOC114297131 | 5.524254 | 5.790801 | 5.722886 | 2.725715 | 2.786212 | 2.295837 | 1.02486  | 3.246819 | 151.1319 | 6.82E-21 | 7.85E-20 |

|              |          |          |          |          |          |          |          |          |          |          |          |
|--------------|----------|----------|----------|----------|----------|----------|----------|----------|----------|----------|----------|
| LOC114297164 | 0.330663 | 0.275198 | 0.221147 | 0.81016  | 0.802511 | 0.711334 | -1.57411 | 0.197446 | 42.02178 | 4.87E-09 | 2.04E-08 |
| LOC114297214 | 1.083509 | 1.037505 | 1.134252 | 2.683033 | 2.698666 | 2.884542 | -1.45132 | 2.786656 | 218.9283 | 9.97E-26 | 1.72E-24 |
| LOC114297222 | 3.308499 | 3.663085 | 3.50812  | 1.407593 | 1.324192 | 1.306111 | 1.273003 | 3.849747 | 350.6747 | 1.22E-32 | 3.49E-31 |
| LOC114297250 | 1.393456 | 0.980643 | 1.377944 | 6.205983 | 6.481936 | 6.942476 | -2.48602 | 1.781962 | 271.9328 | 8.21E-29 | 1.78E-27 |
| LOC114297304 | 0.26052  | 0.32268  | 0.267161 | 0.994516 | 1.441803 | 1.312882 | -2.26338 | 1.446106 | 181.2072 | 3.45E-23 | 4.86E-22 |
| LOC114297312 | 3.299287 | 3.281574 | 3.504229 | 29.1879  | 26.60196 | 32.49753 | -3.23504 | 4.20456  | 1984.264 | 9.21E-62 | 2.4E-59  |
| LOC114297369 | 0.118948 | 0.014882 | 0.043564 | 0.504528 | 0.453998 | 0.526776 | -3.07405 | -0.58343 | 65.22805 | 3.01E-12 | 1.69E-11 |
| LOC114297371 | 0.189169 | 0.231798 | 0.195621 | 0.070798 | 0.103524 | 0.076469 | 1.165456 | -0.18876 | 15.8053  | 0.000142 | 0.000351 |
| LOC114297417 | 1.161291 | 1.251248 | 1.209961 | 9.081021 | 7.923848 | 9.136168 | -2.95478 | 3.935075 | 1600.715 | 1.01E-58 | 2.14E-56 |
| LOC114297455 | 0.062388 | 0.070249 | 0.068548 | 0.476324 | 0.553633 | 0.377284 | -2.87376 | -0.55091 | 63.93711 | 4.4E-12  | 2.43E-11 |
| LOC114297460 | 20.71865 | 19.75044 | 20.88662 | 4.578401 | 3.604879 | 3.832475 | 2.260546 | 3.605115 | 784.3666 | 6.08E-46 | 4.62E-44 |
| LOC114297517 | 14.67244 | 14.62833 | 15.57396 | 35.42416 | 36.83262 | 36.79473 | -1.38767 | 5.242072 | 1056.46  | 3.4E-51  | 4.03E-49 |
| LOC114297530 | 0.48229  | 0.434446 | 0.339144 | 1.718366 | 1.491043 | 1.962064 | -2.13567 | 0.778602 | 107.4575 | 5.56E-17 | 4.65E-16 |
| LOC114297533 | 2.553914 | 2.571395 | 2.850634 | 0.049128 | 0.038681 | 0.018572 | 6.092021 | 1.629616 | 483.4824 | 9.28E-38 | 3.96E-36 |
| LOC114297534 | 0.121615 | 0.152154 | 0.178165 | 0.687787 | 0.889673 | 0.66859  | -2.41686 | 0.058279 | 77.80465 | 8.76E-14 | 5.62E-13 |
| LOC114297532 | 7.649033 | 7.397279 | 7.929875 | 0.784936 | 0.441451 | 0.678247 | 3.500767 | 2.040622 | 419.7639 | 1.8E-35  | 6.42E-34 |
| LOC114297529 | 1.529331 | 1.466909 | 1.161717 | 2.265227 | 2.972606 | 3.010146 | -1.10509 | 1.755939 | 61.52867 | 9.01E-12 | 4.85E-11 |
| LOC114297548 | 4.329524 | 4.436281 | 4.757029 | 14.95357 | 12.76543 | 13.26961 | -1.69795 | 2.685503 | 262.2703 | 2.76E-28 | 5.74E-27 |
| LOC114297550 | 0.833184 | 0.871152 | 0.871861 | 0.036061 | 0.056787 | 0        | 4.595548 | -0.33805 | 89.46335 | 4.18E-15 | 3.02E-14 |
| LOC114297585 | 0.145925 | 0.191696 | 0.320668 | 1.547381 | 1.462027 | 1.571046 | -2.89504 | 0.153283 | 108.6352 | 4.25E-17 | 3.58E-16 |
| LOC114297575 | 4.543688 | 4.014782 | 6.517777 | 10.72603 | 9.303393 | 9.627468 | -1.07614 | 2.852394 | 86.42196 | 2.22E-10 | 1.06E-09 |
| LOC114297564 | 7.097707 | 6.43857  | 7.040632 | 2.606872 | 3.143799 | 3.143583 | 1.092741 | 3.030949 | 142.4984 | 3.52E-20 | 3.83E-19 |
| LOC114297590 | 0.862481 | 1.111318 | 1.143034 | 0.226286 | 0.267255 | 0.207749 | 2.032805 | 1.17163  | 108.4919 | 4.39E-17 | 3.7E-16  |
| LOC114297579 | 4.173117 | 3.632294 | 3.74128  | 8.982174 | 9.380825 | 9.183887 | -1.35759 | 2.963209 | 219.984  | 8.55E-26 | 1.48E-24 |
| LOC114297605 | 6.059199 | 6.404398 | 6.376911 | 1.983462 | 1.694623 | 2.201592 | 1.570894 | 2.431376 | 170.6946 | 2.04E-22 | 2.68E-21 |
| LOC114297617 | 1.679518 | 1.76261  | 1.863273 | 0.177848 | 0.233386 | 0.246521 | 2.8685   | 0.959375 | 158.5635 | 1.74E-21 | 2.11E-20 |

|              |          |          |          |          |          |          |          |          |          |          |          |
|--------------|----------|----------|----------|----------|----------|----------|----------|----------|----------|----------|----------|
| LOC114297627 | 0.974348 | 0.93656  | 0.887779 | 0.431998 | 0.374154 | 0.293958 | 1.257437 | -0.12489 | 19.19074 | 3.22E-05 | 8.69E-05 |
| LOC114297631 | 0.485444 | 0.394773 | 0.316076 | 0.212442 | 0.193003 | 0.13591  | 1.064334 | 0.087419 | 16.1075  | 0.000124 | 0.000309 |
| LOC114297642 | 2.701623 | 2.444017 | 2.638565 | 0.923449 | 0.561844 | 0.253888 | 2.125144 | 1.113809 | 101.358  | 1.79E-15 | 1.33E-14 |
| LOC114297641 | 25.95126 | 26.25411 | 26.79685 | 1.837978 | 1.754136 | 1.768632 | 3.776822 | 4.755375 | 3224.815 | 9.3E-72  | 4.78E-69 |
| LOC114297661 | 0.764633 | 0.743569 | 0.534631 | 0.189541 | 0.174111 | 0.047769 | 2.242772 | -0.29921 | 40.34675 | 8.76E-09 | 3.58E-08 |
| LOC114297669 | 5.596859 | 4.638309 | 3.886486 | 20.83654 | 20.76383 | 20.06157 | -2.22177 | 3.117086 | 560.1847 | 6.52E-40 | 3.25E-38 |
| LOC114297668 | 12.1197  | 11.86314 | 12.30454 | 3.616105 | 3.11083  | 2.531507 | 1.88287  | 2.640241 | 266.1097 | 1.7E-28  | 3.59E-27 |
| LOC114297703 | 1.690658 | 1.381099 | 1.384091 | 0.060261 | 0.094895 | 0.091123 | 3.968711 | -0.27036 | 86.22499 | 9.53E-15 | 6.64E-14 |
| LOC114297725 | 1.112563 | 1.295209 | 1.222419 | 3.599259 | 3.184804 | 3.395135 | -1.58955 | 1.90549  | 139.7601 | 6E-20    | 6.41E-19 |
| LOC114297795 | 2.133204 | 1.957172 | 1.909796 | 0        | 0.203549 | 0.217176 | 3.596959 | 1.106662 | 191.5091 | 1.68E-20 | 1.87E-19 |
| LOC114297819 | 5.770242 | 7.03872  | 7.396674 | 1.456843 | 1.605897 | 3.52472  | 1.448867 | -0.08997 | 24.08216 | 4.14E-06 | 1.26E-05 |
| LOC114297839 | 3.468075 | 3.857854 | 3.695398 | 1.066596 | 1.154727 | 1.008026 | 1.662425 | 2.776608 | 244.7184 | 2.73E-27 | 5.24E-26 |
| LOC114297865 | 0.672055 | 0.654471 | 0.578758 | 1.782986 | 1.507853 | 1.847344 | -1.52801 | 0.998105 | 71.06104 | 5.63E-13 | 3.37E-12 |
| LOC114297900 | 0.02071  | 0.01166  | 0.056888 | 0.621186 | 0.489101 | 0.569285 | -4.2613  | -0.18735 | 130.6495 | 3.71E-19 | 3.72E-18 |
| LOC114297921 | 1.389132 | 1.467904 | 1.314964 | 2.564044 | 2.752966 | 2.526049 | -1.01643 | 1.53082  | 47.95931 | 6.5E-10  | 2.96E-09 |
| LOC114297929 | 3.719821 | 3.708404 | 3.691334 | 1.002268 | 1.252122 | 1.293286 | 1.525536 | 3.320767 | 333.8343 | 6.96E-32 | 1.9E-30  |
| LOC114297983 | 0.716152 | 0.744356 | 1.028979 | 0.03338  | 0.052565 | 0.025238 | 4.272232 | -0.27598 | 88.85907 | 4.87E-15 | 3.49E-14 |
| LOC114297975 | 0.89997  | 0.786231 | 0.818346 | 0.282066 | 0.088836 | 0.255914 | 1.916782 | 0.157092 | 46.29395 | 1.13E-09 | 5.04E-09 |
| LOC114297997 | 10.23325 | 10.54342 | 11.11038 | 3.308696 | 3.155134 | 3.446656 | 1.577798 | 3.36988  | 380.2076 | 6.67E-34 | 2.1E-32  |
| LOC114298049 | 61.43936 | 56.67528 | 59.28969 | 26.46706 | 25.64659 | 28.00225 | 1.041221 | 6.334087 | 898.5116 | 8.88E-38 | 3.79E-36 |
| LOC114298063 | 1.17493  | 1.011681 | 0.911255 | 2.763992 | 3.16549  | 2.944677 | -1.61397 | -0.12126 | 35.18206 | 5.62E-08 | 2.11E-07 |
| LOC114298090 | 3.61519  | 3.639132 | 3.642095 | 0.979175 | 0.904406 | 1.352516 | 1.631482 | 2.780809 | 228.5324 | 2.52E-26 | 4.53E-25 |
| LOC114298110 | 1.35655  | 1.140512 | 1.510371 | 5.162087 | 4.375113 | 4.822689 | -1.93719 | 2.376096 | 259.5462 | 3.91E-28 | 8.01E-27 |
| LOC114298104 | 28.50803 | 29.05893 | 30.05905 | 56.64109 | 53.29484 | 54.37283 | -1.01175 | 5.678274 | 696.9426 | 5.6E-43  | 3.49E-41 |
| LOC114298109 | 0.069074 | 0.126388 | 0.104355 | 0.76908  | 0.45725  | 0.652679 | -2.73207 | 0.367921 | 111.2763 | 2.34E-17 | 2.02E-16 |
| LOC114298179 | 1.217199 | 1.089423 | 0.960176 | 0.397143 | 0.335032 | 0.493297 | 1.301429 | 0.625413 | 35.61068 | 4.8E-08  | 1.82E-07 |

|              |          |          |          |          |          |          |          |          |          |          |          |
|--------------|----------|----------|----------|----------|----------|----------|----------|----------|----------|----------|----------|
| LOC114298173 | 21.29613 | 20.99719 | 21.60246 | 6.386591 | 5.744194 | 6.983055 | 1.634828 | 4.926842 | 997.8163 | 3.54E-50 | 3.72E-48 |
| LOC114298203 | 0        | 0        | 0        | 1.457659 | 1.419538 | 1.305109 | -8.77723 | 0.015187 | 221.982  | 1.11E-25 | 1.91E-24 |
| LOC114298214 | 1.618786 | 1.773486 | 1.646433 | 0.516955 | 0.457912 | 0.432194 | 1.743878 | 3.556192 | 489.2961 | 5.91E-38 | 2.57E-36 |
| LOC114298235 | 6.62126  | 5.781835 | 6.755408 | 0.614095 | 0.773629 | 1.392897 | 2.622936 | 0.799987 | 121.5866 | 2.46E-18 | 2.31E-17 |
| LOC114298263 | 66.68232 | 70.61806 | 70.78056 | 30.19526 | 32.34736 | 33.4031  | 1.009156 | 5.826875 | 687.2524 | 3.69E-41 | 2.02E-39 |
| LOC114298309 | 2.403504 | 2.544768 | 2.798492 | 0.912955 | 0.82152  | 0.887474 | 1.453366 | 0.630033 | 44.21371 | 2.29E-09 | 9.89E-09 |
| LOC114298297 | 0        | 0        | 0        | 1.82124  | 1.875209 | 1.271063 | -8.14994 | -0.58433 | 136.8875 | 1.48E-19 | 1.54E-18 |
| LOC114298332 | 1.740383 | 1.427758 | 1.447832 | 0.316371 | 0.2491   | 0.307541 | 2.295526 | 0.283427 | 70.07138 | 7.45E-13 | 4.41E-12 |
| LOC114298330 | 4.04998  | 3.841681 | 3.991409 | 0.862635 | 0.889999 | 0.922093 | 2.041123 | 3.154318 | 485.8012 | 7.75E-38 | 3.34E-36 |
| LOC114298343 | 142.6775 | 128.695  | 144.3081 | 275.5464 | 272.9921 | 275.1095 | -1.09242 | 7.372082 | 1209.952 | 1.36E-28 | 2.87E-27 |
| LOC114298379 | 2.746925 | 2.534423 | 2.392321 | 0.217105 | 0.262987 | 0.202027 | 3.377582 | 2.208419 | 452.8364 | 1.08E-36 | 4.29E-35 |
| LOC114298365 | 0.953591 | 1.073742 | 0.576263 | 1.820132 | 2.183788 | 1.965924 | -1.30181 | -0.06255 | 23.94085 | 4.39E-06 | 1.33E-05 |
| LOC114298385 | 0.51873  | 0.584089 | 0.984459 | 1.028682 | 1.619899 | 2.009201 | -1.30261 | -0.36006 | 18.56885 | 4.21E-05 | 0.000112 |
| LOC114298392 | 0.741335 | 0.93809  | 0.86108  | 0.128344 | 0.202108 | 0.194074 | 2.129677 | 1.189023 | 118.8142 | 4.46E-18 | 4.09E-17 |
| LOC114298402 | 5.86862  | 5.517836 | 5.94875  | 10.73994 | 9.813799 | 12.05801 | -1.01817 | 3.684971 | 215.377  | 1.67E-25 | 2.84E-24 |
| LOC114298405 | 2.175536 | 1.824207 | 1.373181 | 8.666762 | 10.40151 | 7.888659 | -2.42083 | 1.840118 | 251.7319 | 4.8E-27  | 9.04E-26 |
| LOC114298412 | 14.25189 | 12.19762 | 12.32368 | 89.92074 | 89.46119 | 88.18902 | -2.88955 | 5.627683 | 4254.671 | 3.2E-72  | 1.7E-69  |
| LOC114298447 | 0.330446 | 0.274631 | 0.363074 | 0.028604 | 0        | 0        | 5.042457 | -0.41409 | 86.47691 | 8.93E-15 | 6.25E-14 |
| LOC114298441 | 9.14014  | 10.55871 | 10.91089 | 24.80301 | 23.60075 | 26.17428 | -1.39284 | 4.348661 | 519.756  | 1.91E-38 | 8.6E-37  |
| LOC114298465 | 0.147841 | 0.225222 | 0.20066  | 0.600732 | 0.485444 | 0.490053 | -1.55341 | 0.359807 | 45.47599 | 1.49E-09 | 6.56E-09 |
| LOC114298496 | 4.275182 | 4.052472 | 4.361798 | 8.822258 | 7.492692 | 7.659537 | -1.01631 | 4.095603 | 259.9848 | 3.7E-28  | 7.6E-27  |
| LOC114298494 | 0.937676 | 1.007829 | 0.913188 | 0        | 0        | 0        | 8.114379 | -0.33552 | 115.0168 | 1.34E-17 | 1.18E-16 |
| LOC114298501 | 5.934827 | 4.98609  | 5.672931 | 2.204452 | 1.814608 | 2.04552  | 1.355752 | 2.63864  | 152.2894 | 5.5E-21  | 6.38E-20 |
| LOC114298506 | 1.778212 | 1.677572 | 2.640265 | 0        | 0        | 0        | 8.031596 | -0.40748 | 103.9767 | 1.59E-16 | 1.28E-15 |
| LOC114298541 | 0.524771 | 0.393927 | 0.46127  | 0.211986 | 0.116838 | 0.240415 | 1.178131 | -0.09977 | 16.96456 | 8.5E-05  | 0.000216 |
| LOC114298566 | 5.869675 | 6.18827  | 5.709851 | 0        | 0        | 0        | 9.936275 | 1.318362 | 425.0582 | 2.91E-35 | 1.02E-33 |

|              |          |          |          |          |          |          |          |          |          |          |          |
|--------------|----------|----------|----------|----------|----------|----------|----------|----------|----------|----------|----------|
| LOC114298567 | 2.489058 | 2.456812 | 2.54863  | 0.019254 | 0.04548  | 0.029115 | 6.105384 | 1.877561 | 580.2622 | 8.72E-41 | 4.62E-39 |
| LOC114298564 | 10.99384 | 11.07835 | 10.657   | 27.94982 | 28.16408 | 28.41325 | -1.47432 | 4.910015 | 914.5483 | 1.24E-48 | 1.14E-46 |
| LOC114298583 | 2.291099 | 1.946817 | 1.852902 | 4.009983 | 4.108181 | 3.511769 | -1.02982 | 3.405795 | 173.2579 | 1.24E-21 | 1.52E-20 |
| LOC114298667 | 5.748899 | 6.038801 | 4.790407 | 0.210412 | 0.662686 | 0.84846  | 3.076165 | 1.314594 | 201.6689 | 1.58E-23 | 2.29E-22 |
| LOC114298663 | 2.464744 | 2.417194 | 2.183966 | 1.30078  | 0.625894 | 0.928843 | 1.236405 | 0.426286 | 27.46365 | 1.06E-06 | 3.47E-06 |
| LOC114298692 | 4.337704 | 4.105819 | 3.872388 | 1.404546 | 1.31931  | 1.564957 | 1.413279 | 2.62989  | 165.2965 | 5.23E-22 | 6.62E-21 |
| LOC114298668 | 0.403302 | 0.522663 | 0.443124 | 0.013833 | 0.054457 | 0.094126 | 2.848253 | 0.170541 | 80.52763 | 4.22E-14 | 2.79E-13 |
| LOC114298686 | 2.219074 | 1.895544 | 2.017811 | 7.650461 | 7.77607  | 8.161096 | -2.04655 | 3.314604 | 622.0617 | 5.84E-42 | 3.4E-40  |
| LOC114298713 | 0.03224  | 0.048403 | 0.082654 | 2.324714 | 1.722731 | 2.304141 | -5.3531  | 1.627669 | 547.1694 | 1.19E-39 | 5.85E-38 |
| LOC114298750 | 5.425056 | 5.413784 | 5.706486 | 1.963009 | 1.619208 | 1.837546 | 1.51011  | 2.121921 | 132.6446 | 2.48E-19 | 2.52E-18 |
| LOC114298754 | 0.058125 | 0.074798 | 0.082111 | 0.633962 | 0.77251  | 0.741803 | -3.42204 | 0.548742 | 182.7887 | 2.66E-23 | 3.79E-22 |
| LOC114298842 | 0.189281 | 0.127878 | 0.207971 | 2.270918 | 2.38406  | 1.92509  | -3.6956  | -0.04803 | 128.7964 | 5.43E-19 | 5.37E-18 |
| LOC114298874 | 0.985027 | 0.702975 | 0.884124 | 0        | 0        | 0.038136 | 5.637706 | 0.095168 | 138.7244 | 7.36E-20 | 7.81E-19 |
| LOC114298886 | 4.646331 | 4.520646 | 4.138615 | 1.394033 | 1.194463 | 0.991987 | 1.806135 | 1.937718 | 155.0723 | 3.29E-21 | 3.91E-20 |
| LOC114298901 | 0.276744 | 0.32942  | 0.234569 | 0.114988 | 0.07922  | 0.16301  | 1.10852  | -0.2276  | 13.65415 | 0.000379 | 0.000875 |
| LOC114298900 | 5.774511 | 5.275886 | 6.155772 | 1.015842 | 0.984418 | 1.181611 | 2.321108 | 2.836484 | 437.0855 | 4.04E-36 | 1.54E-34 |
| LOC114298911 | 4.391608 | 4.39305  | 4.157464 | 0.285113 | 0.28061  | 0.242511 | 3.889357 | 1.848268 | 419.9084 | 1.78E-35 | 6.35E-34 |
| LOC114298923 | 3.190605 | 1.938871 | 3.672586 | 0.368251 | 0.362435 | 0.417635 | 2.808193 | 0.136313 | 76.37632 | 1.53E-13 | 9.62E-13 |
| LOC114298935 | 0.459383 | 0.401025 | 0.431017 | 0.966437 | 0.82743  | 1.021553 | -1.22418 | 2.024761 | 91.88353 | 2.28E-15 | 1.68E-14 |
| LOC114298992 | 1.666525 | 1.685023 | 1.444934 | 0.020608 | 0.032453 | 0.046744 | 5.365305 | 1.189153 | 326.9992 | 1.44E-31 | 3.83E-30 |
| LOC114299000 | 8.149308 | 7.148824 | 7.600476 | 0        | 0.271257 | 0.260475 | 5.111711 | 0.448128 | 179.7481 | 4.4E-23  | 6.14E-22 |
| LOC114299031 | 9.400459 | 10.33387 | 10.65528 | 24.65316 | 22.7083  | 22.21421 | -1.29786 | 3.778096 | 370.7868 | 1.65E-33 | 5.02E-32 |
| LOC114299060 | 1.008184 | 0.94601  | 1.107733 | 4.276295 | 3.206677 | 3.541099 | -1.9281  | 0.377158 | 68.51525 | 1.16E-12 | 6.75E-12 |
| LOC114299079 | 4.296964 | 4.576422 | 4.661111 | 0.522399 | 0.724706 | 0.564243 | 2.778163 | 2.501275 | 427.5399 | 9.14E-36 | 3.36E-34 |
| LOC114299080 | 0.835591 | 0.490038 | 0.975479 | 0.316449 | 0.249161 | 0.095703 | 1.745502 | -0.07071 | 30.56012 | 4.67E-07 | 1.58E-06 |
| LOC114299110 | 34.07083 | 35.62341 | 33.47849 | 13.84718 | 13.8763  | 14.03176 | 1.199145 | 5.185465 | 741.2517 | 5.81E-45 | 4.09E-43 |



|              |          |          |          |          |          |          |          |          |          |          |          |
|--------------|----------|----------|----------|----------|----------|----------|----------|----------|----------|----------|----------|
| LOC114299178 | 41.79806 | 41.04465 | 44.63474 | 90.78012 | 87.82481 | 92.51679 | -1.19418 | 5.647059 | 945.6229 | 3.18E-49 | 3.12E-47 |
| LOC114299174 | 189.1565 | 189.6023 | 185.9894 | 75.13701 | 76.97208 | 80.14319 | 1.176313 | 7.058218 | 1381.75  | 1.16E-36 | 4.57E-35 |
| LOC114299172 | 171.8237 | 170.0892 | 165.4788 | 65.00385 | 65.23009 | 67.53146 | 1.253848 | 6.866415 | 1521.112 | 2.71E-44 | 1.84E-42 |
| LOC114299184 | 4.193275 | 4.701178 | 4.587381 | 1.814911 | 1.948636 | 2.220467 | 1.053336 | 2.443877 | 83.38815 | 1.99E-14 | 1.35E-13 |
| LOC114299205 | 4.043228 | 3.350074 | 4.107183 | 1.109414 | 1.74703  | 1.625164 | 1.226144 | 1.136594 | 45.84279 | 1.32E-09 | 5.83E-09 |
| LOC114299235 | 0.322092 | 0.523864 | 0.393218 | 3.05764  | 4.097844 | 4.033335 | -3.29224 | 0.836207 | 207.9451 | 5.06E-25 | 8.23E-24 |
| LOC114299215 | 1.57885  | 1.726988 | 1.883442 | 1.066025 | 0.710221 | 0.371995 | 1.216869 | -0.1445  | 16.89728 | 8.76E-05 | 0.000222 |
| LOC114299289 | 0.375151 | 0.447268 | 0.375824 | 0.100288 | 0.142134 | 0.136484 | 1.516422 | -0.29208 | 23.23213 | 5.87E-06 | 1.75E-05 |
| LOC114299312 | 1.433491 | 1.546145 | 1.47556  | 2.907558 | 2.613273 | 3.110826 | -1.06022 | 2.14844  | 76.2295  | 1.34E-13 | 8.5E-13  |
| LOC114299321 | 0.066311 | 0.074666 | 0.083267 | 0.619925 | 0.732163 | 0.755139 | -3.32879 | 0.343598 | 153.3269 | 4.54E-21 | 5.31E-20 |
| LOC114299362 | 0.344901 | 0.408798 | 0.359012 | 1.187941 | 0.779454 | 0.973014 | -1.4836  | 0.217407 | 37.67974 | 2.26E-08 | 8.88E-08 |
| LOC114299361 | 2.853348 | 2.252007 | 2.593044 | 0.945272 | 0.782443 | 0.751342 | 1.546032 | 1.964305 | 120.2419 | 3.28E-18 | 3.05E-17 |
| LOC114299396 | 0.383722 | 0.406655 | 0.37201  | 0.820634 | 0.775367 | 0.899662 | -1.20423 | -0.20379 | 19.23797 | 3.15E-05 | 8.53E-05 |
| LOC114299397 | 0.612469 | 0.873543 | 0.897261 | 1.781376 | 1.870127 | 2.188622 | -1.41268 | 0.088373 | 31.72707 | 2.04E-07 | 7.21E-07 |
| LOC114299394 | 1.108641 | 1.092287 | 1.116601 | 6.381821 | 6.435311 | 6.645097 | -2.65681 | 2.924501 | 678.9613 | 1.88E-43 | 1.21E-41 |
| LOC114299401 | 30.31215 | 27.76111 | 32.32373 | 68.85052 | 55.74485 | 68.67109 | -1.19832 | 4.59966  | 381.9961 | 4.25E-25 | 6.97E-24 |
| LOC114299423 | 1.22956  | 1.300995 | 1.188038 | 2.347438 | 2.396592 | 2.411727 | -1.05156 | 3.165169 | 162.9354 | 7.94E-22 | 9.92E-21 |
| LOC114299425 | 0.010153 | 0        | 0        | 1.088902 | 1.206123 | 1.32563  | -7.95666 | 0.867795 | 398.9776 | 1.16E-34 | 3.89E-33 |
| LOC114299418 | 0.184679 | 0.184843 | 0.14655  | 0.354365 | 0.32307  | 0.380735 | -1.13278 | -0.27544 | 16.12423 | 0.000123 | 0.000307 |
| LOC114299428 | 3.579687 | 3.689813 | 3.561361 | 9.80941  | 9.329497 | 10.08462 | -1.53728 | 3.522174 | 443.3196 | 2.38E-36 | 9.21E-35 |
| LOC114299430 | 2.299882 | 1.946972 | 2.729872 | 5.126789 | 4.949716 | 5.029844 | -1.21727 | 2.746737 | 143.9873 | 2.64E-20 | 2.9E-19  |
| LOC114299442 | 0.360086 | 0.405456 | 0.499757 | 1.963715 | 1.62754  | 1.667037 | -2.14694 | 0.819621 | 111.9888 | 2E-17    | 1.73E-16 |
| LOC114299461 | 0.430478 | 0.52597  | 0.694382 | 0.033299 | 0.091766 | 0.012588 | 3.417677 | 0.130087 | 91.1534  | 8.82E-15 | 6.17E-14 |
| LOC114299462 | 0.939104 | 0.978121 | 0.928649 | 0.064017 | 0.016802 | 0.096803 | 3.851888 | 0.496155 | 148.9285 | 1.03E-20 | 1.17E-19 |
| LOC114299467 | 3.481293 | 3.372787 | 3.408164 | 0.060501 | 0.085745 | 0.054891 | 5.540257 | 2.970981 | 1229.82  | 6.35E-54 | 9.09E-52 |
| LOC114299523 | 104.7315 | 96.89209 | 104.142  | 620.8676 | 596.2169 | 614.1095 | -2.68779 | 8.427874 | 9398.936 | 4.1E-92  | 2.61E-88 |

|              |          |          |          |          |          |          |          |          |          |          |          |
|--------------|----------|----------|----------|----------|----------|----------|----------|----------|----------|----------|----------|
| LOC114299532 | 15.01995 | 13.69854 | 13.93248 | 25.51738 | 26.38687 | 27.46025 | -1.00227 | 3.730363 | 226.694  | 3.27E-26 | 5.83E-25 |
| LOC114299544 | 1.612668 | 1.054371 | 1.586142 | 0.047283 | 0.130302 | 0.125122 | 3.628089 | 0.906053 | 180.6376 | 2.14E-22 | 2.8E-21  |
| LOC114299547 | 14.35454 | 13.46701 | 14.5172  | 4.442006 | 4.921086 | 4.961754 | 1.452353 | 4.518623 | 610.1714 | 1.24E-41 | 7.04E-40 |
| LOC114299619 | 0.301335 | 0.610744 | 0.397307 | 1.314655 | 2.070231 | 2.236435 | -2.23392 | -0.67106 | 39.05775 | 1.38E-08 | 5.53E-08 |
| LOC114299608 | 0.793197 | 0.757814 | 0.76588  | 1.762311 | 1.80042  | 1.431537 | -1.20527 | 2.221639 | 98.93714 | 4.08E-16 | 3.18E-15 |
| LOC114299624 | 0.925339 | 1.041929 | 1.04495  | 0.264775 | 0.233002 | 0.164861 | 2.095011 | 1.169325 | 115.758  | 8.67E-18 | 7.77E-17 |
| LOC114299603 | 8.051415 | 8.317807 | 8.794286 | 0.287545 | 0.520727 | 0.456548 | 4.165426 | 3.05825  | 1045.034 | 5.32E-51 | 6.19E-49 |
| LOC114299645 | 0.833636 | 1.269968 | 1.185348 | 0.311994 | 0.280747 | 0.404382 | 1.58394  | -0.03476 | 29.53746 | 4.73E-07 | 1.6E-06  |
| LOC114299701 | 7.049141 | 6.757445 | 6.349656 | 0.865816 | 1.408877 | 1.571082 | 2.245023 | 1.953152 | 216.5913 | 1.4E-25  | 2.39E-24 |
| LOC114299700 | 0.771072 | 0.972412 | 0.881097 | 2.018406 | 2.251402 | 1.653227 | -1.27656 | 0.52861  | 35.80254 | 4.47E-08 | 1.7E-07  |
| LOC114299711 | 2.056255 | 1.683883 | 1.889591 | 6.116572 | 5.832691 | 6.114689 | -1.7787  | 1.698734 | 151.4454 | 6.43E-21 | 7.43E-20 |
| LOC114299705 | 0.059789 | 0        | 0        | 1.521592 | 2.3961   | 2.547379 | -6.2614  | -0.77538 | 108.951  | 3.96E-17 | 3.35E-16 |
| LOC114299772 | 2.128719 | 2.411286 | 2.226869 | 4.819661 | 4.652327 | 4.695154 | -1.17179 | 3.066202 | 182.0466 | 3.01E-23 | 4.27E-22 |
| LOC114299826 | 8.445533 | 7.842139 | 8.182903 | 3.257767 | 3.670949 | 3.834765 | 1.071496 | 4.035574 | 272.973  | 7.22E-29 | 1.57E-27 |
| LOC114299830 | 0.809496 | 1.230512 | 0.97837  | 0.18394  | 0.202759 | 0.333771 | 1.906376 | 0.045157 | 41.98579 | 4.94E-09 | 2.07E-08 |
| LOC114299867 | 1.092585 | 1.008803 | 1.008394 | 0.754727 | 0.375314 | 0.360396 | 1.012783 | 0.191436 | 15.76072 | 0.000145 | 0.000357 |
| LOC114299899 | 1.688294 | 1.728196 | 1.948686 | 0.434002 | 0.585804 | 0.562519 | 1.630207 | 1.099311 | 74.95038 | 1.91E-13 | 1.19E-12 |
| LOC114299916 | 2.232308 | 1.553736 | 2.136626 | 0.648882 | 0.632916 | 0.637048 | 1.524518 | 2.887822 | 184.977  | 3.05E-18 | 2.85E-17 |
| LOC114299923 | 0.657167 | 0.595584 | 0.660417 | 0.18939  | 0.091766 | 0.099133 | 2.272692 | 0.622445 | 87.018   | 7.78E-15 | 5.47E-14 |
| LOC114299949 | 1.125203 | 1.050663 | 0.995077 | 0.049888 | 0.078561 | 0.150876 | 3.286269 | -0.42659 | 62.81042 | 6.14E-12 | 3.35E-11 |
| LOC114300018 | 0.755436 | 0.737203 | 0.885364 | 1.769963 | 1.850137 | 1.799669 | -1.29445 | 1.257625 | 63.09623 | 5.64E-12 | 3.09E-11 |
| LOC114300061 | 17.96934 | 18.40576 | 17.83434 | 35.1991  | 35.28554 | 34.22418 | -1.05499 | 5.403656 | 665.6757 | 4.1E-43  | 2.58E-41 |
| LOC114300059 | 18.48337 | 19.76111 | 17.84682 | 7.466547 | 7.215024 | 7.49276  | 1.233675 | 4.38402  | 415.0888 | 2.72E-35 | 9.56E-34 |
| LOC114300069 | 2.264845 | 2.627961 | 2.367091 | 4.217501 | 5.27757  | 4.53634  | -1.06602 | 2.97616  | 131.0273 | 4.94E-19 | 4.9E-18  |
| LOC114300111 | 1.385533 | 1.293137 | 1.473498 | 0.592624 | 0.59387  | 0.641548 | 1.073326 | 2.043454 | 68.30492 | 1.23E-12 | 7.15E-12 |
| LOC114300125 | 1.480697 | 1.316259 | 1.741073 | 10.86102 | 11.2658  | 11.17503 | -2.97915 | 2.903348 | 767.2017 | 1.47E-45 | 1.08E-43 |

|              |          |          |          |          |          |          |          |          |          |          |          |
|--------------|----------|----------|----------|----------|----------|----------|----------|----------|----------|----------|----------|
| LOC114300116 | 1.020993 | 0.942063 | 0.903679 | 2.242647 | 2.13112  | 1.734577 | -1.18188 | 1.696793 | 68.91532 | 1.04E-12 | 6.05E-12 |
| LOC114300148 | 5.289297 | 5.334944 | 4.978643 | 0.939576 | 0.739791 | 1.136616 | 2.358046 | 2.435034 | 322.2387 | 2.41E-31 | 6.31E-30 |
| LOC114300142 | 1.949439 | 1.721619 | 1.357956 | 8.70878  | 6.820528 | 7.49506  | -2.28271 | 3.496094 | 558.6614 | 1.49E-20 | 1.66E-19 |
| LOC114300213 | 50.22248 | 48.84685 | 48.56538 | 14.06696 | 15.22013 | 16.19992 | 1.58817  | 5.221302 | 1233.632 | 5.58E-54 | 8.03E-52 |
| LOC114300205 | 0.56713  | 0.404438 | 0.726984 | 1.546411 | 0.838785 | 1.039284 | -1.07436 | 0.489426 | 22.93411 | 7.58E-06 | 2.23E-05 |
| LOC114300250 | 3.441899 | 2.583714 | 3.448074 | 0.674748 | 0.579572 | 0.834802 | 2.064532 | 0.86695  | 90.58406 | 3.15E-15 | 2.3E-14  |
| LOC114300216 | 3.351679 | 3.222127 | 3.717371 | 1.666885 | 1.357706 | 1.4993   | 1.088359 | 2.252137 | 78.90775 | 6.51E-14 | 4.22E-13 |
| LOC114300248 | 0.60786  | 0.446046 | 0.847985 | 0.260726 | 0.215063 | 0.337932 | 1.108321 | 1.060026 | 29.219   | 1.97E-06 | 6.23E-06 |
| LOC114300238 | 2.713442 | 2.854321 | 2.863686 | 1.103334 | 1.277542 | 1.373973 | 1.04298  | 0.853072 | 28.87298 | 6.12E-07 | 2.05E-06 |
| LOC114300218 | 31.32454 | 33.47426 | 33.58004 | 13.46699 | 11.69449 | 12.14635 | 1.298099 | 4.822655 | 592.93   | 3.78E-41 | 2.05E-39 |
| LOC114300261 | 0.924168 | 1.482083 | 1.63083  | 0.458174 | 0.400835 | 0.346412 | 1.6321   | 0.051564 | 32.17407 | 1.72E-07 | 6.14E-07 |
| LOC114300257 | 1.116055 | 1.05675  | 1.309865 | 0.507197 | 0.290436 | 0.766953 | 1.030667 | 0.126696 | 15.39252 | 0.000171 | 0.000417 |
| LOC114300298 | 0.500499 | 0.65101  | 0.606807 | 0.015687 | 0        | 0        | 6.584377 | 0.204787 | 162.8337 | 8.09E-22 | 1.01E-20 |
| LOC114300291 | 22.51149 | 22.67837 | 21.37473 | 4.511072 | 4.059276 | 3.623853 | 2.353732 | 4.137376 | 1091.163 | 8.99E-52 | 1.11E-49 |
| LOC114300327 | 0.26945  | 0.281729 | 0.26786  | 0.046649 | 0.009182 | 0        | 3.886361 | -0.3302  | 74.97765 | 1.9E-13  | 1.19E-12 |
| LOC114300380 | 1.086544 | 0.788443 | 0.902006 | 0.087784 | 0.241914 | 0.199113 | 2.217719 | -0.32871 | 40.39037 | 8.62E-09 | 3.52E-08 |
| LOC114300386 | 7.024261 | 6.147987 | 6.518015 | 17.1682  | 18.37558 | 18.90265 | -1.57387 | 3.682477 | 504.4011 | 1.87E-38 | 8.42E-37 |
| LOC114300423 | 1.119125 | 1.096782 | 1.093004 | 2.260411 | 2.432355 | 2.364156 | -1.199   | 1.36408  | 59.25548 | 1.79E-11 | 9.41E-11 |
| LOC114300429 | 1.938412 | 1.659533 | 1.372938 | 0.553306 | 0.57323  | 0.79264  | 1.252146 | 1.172444 | 47.42294 | 7.77E-10 | 3.51E-09 |
| LOC114300453 | 0.201722 | 0.086529 | 0.063326 | 0.646082 | 0.591196 | 0.567697 | -2.40871 | 0.216429 | 81.38546 | 4.51E-14 | 2.98E-13 |
| LOC114300478 | 1.132183 | 1.3729   | 1.741568 | 3.134655 | 3.34069  | 3.447298 | -1.34031 | 2.057946 | 105.6884 | 8.35E-17 | 6.88E-16 |
| LOC114300479 | 3.403719 | 2.901501 | 3.127071 | 0.559309 | 0.688095 | 0.581455 | 2.250825 | 1.599055 | 178.9049 | 5.07E-23 | 7.01E-22 |
| LOC114300518 | 0.817325 | 0.653902 | 0.8035   | 0.078197 | 0.12314  | 0.295614 | 2.002706 | -0.4088  | 31.98221 | 1.85E-07 | 6.58E-07 |
| LOC114300543 | 0.834723 | 0.650697 | 0.82543  | 0.070033 | 0.073522 | 0.0706   | 3.310308 | 1.058675 | 198.348  | 2.2E-24  | 3.39E-23 |
| LOC114300526 | 1.512275 | 1.009078 | 1.323126 | 0.203633 | 0.601252 | 0.423392 | 1.487498 | 0.020404 | 27.17011 | 1.2E-06  | 3.87E-06 |
| LOC114300602 | 1.863518 | 1.919737 | 1.960397 | 0.360377 | 0.453998 | 0.435952 | 2.062158 | -0.01233 | 48.03393 | 6.34E-10 | 2.9E-09  |

|              |          |          |          |          |          |          |          |          |          |          |          |
|--------------|----------|----------|----------|----------|----------|----------|----------|----------|----------|----------|----------|
| LOC114300619 | 2.363028 | 2.220968 | 2.531985 | 0.390506 | 0.251567 | 0.429454 | 2.62174  | 1.141748 | 158.6167 | 1.72E-21 | 2.09E-20 |
| LOC114300617 | 0.885194 | 1.013339 | 1.00502  | 0.026819 | 0.021116 | 0        | 5.807712 | 1.084589 | 303.517  | 1.93E-30 | 4.72E-29 |
| LOC114300616 | 1.304994 | 1.087752 | 1.191772 | 0.308084 | 0.169802 | 0.20964  | 2.305975 | 0.455786 | 79.61731 | 5.38E-14 | 3.53E-13 |
| LOC114300637 | 1.293401 | 1.363407 | 1.239695 | 0.450224 | 0.275716 | 0.189112 | 2.027767 | -0.03102 | 44.64436 | 1.98E-09 | 8.6E-09  |
| LOC114300641 | 1.786217 | 1.428007 | 1.844836 | 0.454583 | 0.409056 | 0.687394 | 1.579552 | 0.968013 | 62.49134 | 6.76E-12 | 3.68E-11 |
| LOC114300646 | 1.696622 | 1.806567 | 1.600737 | 0.134094 | 0.316743 | 0.481575 | 2.267925 | 0.810542 | 96.2562  | 8.76E-16 | 6.65E-15 |
| LOC114300690 | 2.458443 | 2.420199 | 2.114649 | 0.485207 | 0.321714 | 0.386158 | 2.464137 | 1.591555 | 199.0804 | 1.96E-24 | 3.04E-23 |
| LOC114300752 | 0.832417 | 0.791497 | 0.833312 | 0.100879 | 0.052952 | 0.050848 | 3.483864 | -0.26067 | 76.83878 | 1.14E-13 | 7.25E-13 |
| LOC114300791 | 0.690309 | 0.574516 | 0.758471 | 1.800449 | 1.976067 | 2.598779 | -1.76972 | 0.541881 | 65.80763 | 2.54E-12 | 1.44E-11 |
| LOC114300796 | 33.22964 | 32.30872 | 35.75922 | 10.92928 | 13.08838 | 12.76606 | 1.346452 | 4.254922 | 443.674  | 2.32E-36 | 8.97E-35 |
| LOC114300809 | 0.463592 | 0.551004 | 0.693306 | 1.240682 | 1.161187 | 1.185827 | -1.17735 | 1.083884 | 45.37832 | 1.54E-09 | 6.77E-09 |
| LOC114300808 | 1.128521 | 1.11466  | 0.804882 | 2.663285 | 2.522045 | 3.265345 | -1.57713 | 1.575901 | 106.8228 | 6.43E-17 | 5.34E-16 |
| LOC114300822 | 0.184265 | 0.207482 | 0.229454 | 0.558268 | 0.527474 | 0.523391 | -1.47053 | -0.05975 | 31.09048 | 2.6E-07  | 9.07E-07 |
| LOC114300864 | 1.59107  | 1.495548 | 1.216122 | 0        | 0.019802 | 0.038031 | 5.857748 | 0.769258 | 240.9894 | 4.51E-27 | 8.52E-26 |
| LOC114300896 | 0.540468 | 0.459094 | 0.552163 | 0.24131  | 0.203571 | 0.104255 | 1.430273 | 0.2712   | 31.22033 | 2.48E-07 | 8.65E-07 |
| LOC114300895 | 5.269244 | 4.767715 | 4.290461 | 0.726943 | 0.202013 | 0.54962  | 3.212419 | 1.788132 | 283.8606 | 2.1E-26  | 3.79E-25 |
| LOC114300916 | 0.753337 | 0.737614 | 0.683771 | 2.14346  | 3.234736 | 2.11579  | -1.89256 | 0.615074 | 75.38201 | 1.69E-13 | 1.06E-12 |
| LOC114300942 | 0.243758 | 0.217684 | 0.230885 | 1.207087 | 1.479767 | 1.686655 | -2.7709  | 1.629553 | 284.0695 | 1.87E-29 | 4.28E-28 |
| LOC114300939 | 1.941776 | 1.903009 | 2.17302  | 4.57567  | 4.683547 | 4.250274 | -1.26872 | 1.479314 | 70.62306 | 6.37E-13 | 3.8E-12  |
| LOC114301007 | 3.406518 | 3.340283 | 3.680502 | 1.754525 | 1.40177  | 1.463099 | 1.081022 | 2.425989 | 86.65168 | 8.54E-15 | 6E-14    |
| LOC114301008 | 2.997689 | 2.796033 | 3.342846 | 1.05732  | 1.120671 | 0.799408 | 1.518615 | 1.487604 | 85.97117 | 1.02E-14 | 7.07E-14 |
| LOC114301038 | 26.07202 | 25.01986 | 28.32972 | 97.97992 | 93.64794 | 99.72122 | -1.98053 | 6.180976 | 2940.277 | 1.81E-69 | 8.2E-67  |
| LOC114301060 | 0.664099 | 0.607566 | 0.547255 | 2.112623 | 2.079261 | 1.31206  | -1.66828 | -0.10832 | 36.13684 | 3.96E-08 | 1.51E-07 |
| LOC114301063 | 0.382271 | 0.415594 | 0.340359 | 0.11981  | 0.094335 | 0.099643 | 1.759218 | 0.271744 | 45.99827 | 1.25E-09 | 5.54E-09 |
| LOC114301134 | 2.666384 | 2.437048 | 2.574185 | 0.932897 | 0.798404 | 1.13467  | 1.310581 | 2.264483 | 110.2117 | 2.98E-17 | 2.54E-16 |
| LOC114301144 | 11.97308 | 10.51737 | 11.58649 | 0.567781 | 0.425763 | 0.51105  | 4.404465 | 3.564746 | 1677.341 | 1.4E-59  | 3.12E-57 |

|              |          |          |          |          |          |          |          |          |          |          |          |
|--------------|----------|----------|----------|----------|----------|----------|----------|----------|----------|----------|----------|
| LOC114301162 | 1.00297  | 1.009412 | 0.828942 | 0.27429  | 0.381118 | 0.329372 | 1.404324 | 1.17637  | 60.20795 | 1.34E-11 | 7.12E-11 |
| LOC114301191 | 0.584338 | 0.490247 | 0.541325 | 0.124967 | 0.098395 | 0.062989 | 2.413469 | -0.0888  | 55.89152 | 5.07E-11 | 2.55E-10 |
| LOC114301244 | 0.913136 | 1.12956  | 1.187004 | 0.467583 | 0.497014 | 0.477259 | 1.046282 | 0.935984 | 30.04758 | 3.88E-07 | 1.33E-06 |
| LOC114301243 | 14.95138 | 13.87347 | 14.29819 | 5.955878 | 7.067212 | 6.722877 | 1.012603 | 2.782862 | 102.3532 | 1.82E-16 | 1.46E-15 |
| LOC114301225 | 1.494717 | 1.851352 | 1.478077 | 0.21737  | 0.556238 | 0.369781 | 1.911161 | 0.149621 | 46.09407 | 1.21E-09 | 5.37E-09 |
| LOC114301247 | 11.8324  | 11.92354 | 13.05134 | 44.0227  | 45.7657  | 46.09803 | -1.99123 | 5.265629 | 2028.376 | 4.34E-63 | 1.28E-60 |
| LOC114301229 | 7.589175 | 6.936849 | 6.572734 | 2.028789 | 1.980776 | 2.515606 | 1.577472 | 1.674045 | 105.8634 | 8.02E-17 | 6.61E-16 |
| LOC114301264 | 5.008336 | 4.793469 | 4.815009 | 0.075869 | 0.119473 | 0.114724 | 5.342189 | 0.935516 | 276.0517 | 4.94E-29 | 1.09E-27 |
| LOC114301288 | 1.235245 | 1.207873 | 1.285783 | 0.472728 | 0.511788 | 0.536122 | 1.172396 | -0.14338 | 16.88532 | 8.8E-05  | 0.000223 |
| LOC114301285 | 1.133488 | 0.800395 | 0.949889 | 1.955709 | 1.608603 | 1.887922 | -1.01032 | 2.148166 | 65.98827 | 2.41E-12 | 1.37E-11 |
| LOC114301317 | 0.57025  | 0.600483 | 0.522131 | 1.151792 | 0.929554 | 1.117572 | -1.01685 | 2.241953 | 73.03241 | 3.24E-13 | 1.99E-12 |
| LOC114301270 | 0.572712 | 0.496056 | 0.471947 | 0.180188 | 0.220693 | 0.242196 | 1.134565 | 0.127528 | 19.44556 | 2.88E-05 | 7.85E-05 |
| LOC114301271 | 1.067331 | 1.062067 | 1.090903 | 0.180485 | 0.461851 | 0.341149 | 1.547541 | -0.06881 | 28.15817 | 8.1E-07  | 2.67E-06 |
| LOC114301291 | 13.16331 | 12.78338 | 13.03164 | 24.75897 | 24.79782 | 23.88191 | -1.01871 | 5.078379 | 527.6464 | 3.37E-39 | 1.61E-37 |
| LOC114301304 | 1.576878 | 1.556656 | 1.732582 | 0.431936 | 0.711101 | 0.445328 | 1.487147 | 0.67817  | 46.44012 | 1.08E-09 | 4.8E-09  |
| LOC114301338 | 0        | 0        | 0        | 0.804366 | 0.791663 | 0.608157 | -7.78087 | -0.92591 | 105.8755 | 1.03E-16 | 8.41E-16 |
| LOC114301362 | 0.280747 | 0.105373 | 0.102823 | 1.020695 | 1.205492 | 1.457687 | -2.9656  | -0.48878 | 68.5295  | 1.16E-12 | 6.72E-12 |
| LOC114301385 | 4.930345 | 4.821089 | 5.096422 | 9.729015 | 8.728099 | 9.451106 | -1.01194 | 2.748305 | 107.1111 | 6.02E-17 | 5.02E-16 |
| LOC114301394 | 0.22443  | 0.42118  | 0.213712 | 0.62556  | 0.68528  | 0.76086  | -1.39284 | 0.051519 | 28.82904 | 6.23E-07 | 2.08E-06 |
| LOC114301472 | 0.078678 | 0.310067 | 0.216116 | 2.717412 | 2.083294 | 1.838284 | -3.52923 | -0.08458 | 112.2859 | 1.87E-17 | 1.62E-16 |
| LOC114301483 | 0.835986 | 0.877137 | 0.939408 | 1.692363 | 1.740421 | 1.645129 | -1.04184 | 1.071638 | 36.80516 | 3.11E-08 | 1.2E-07  |
| LOC114301489 | 5.73607  | 5.769863 | 5.71423  | 2.363488 | 2.590708 | 2.592846 | 1.077157 | 2.304592 | 81.93545 | 2.91E-14 | 1.95E-13 |
| LOC114301486 | 4.768514 | 4.717649 | 5.391432 | 20.60724 | 21.06968 | 22.9471  | -2.22634 | 5.019925 | 1974.108 | 1.76E-61 | 4.41E-59 |
| LOC114301487 | 5.165385 | 5.858257 | 5.648073 | 0.746655 | 0.997633 | 1.231687 | 2.347637 | 2.983923 | 465.6562 | 1.24E-35 | 4.47E-34 |
| LOC114301500 | 0.682139 | 0.652874 | 0.843181 | 0        | 0.048817 | 0.117191 | 3.426771 | -0.31306 | 68.09914 | 1.31E-12 | 7.57E-12 |
| LOC114301516 | 2.003826 | 1.999257 | 2.034471 | 0.092218 | 0.036305 | 0        | 5.468083 | 0.423185 | 181.5084 | 3.29E-23 | 4.64E-22 |

|              |          |          |          |          |          |          |          |          |          |          |          |
|--------------|----------|----------|----------|----------|----------|----------|----------|----------|----------|----------|----------|
| LOC114301550 | 5.050784 | 4.193084 | 3.762377 | 1.011513 | 0.796431 | 0.705945 | 2.287254 | 0.944303 | 111.0253 | 2.48E-17 | 2.13E-16 |
| LOC114301636 | 0.072962 | 0.061617 | 0.180375 | 0.630005 | 0.809337 | 0.777167 | -2.91072 | -0.4426  | 69.20461 | 9.53E-13 | 5.59E-12 |
| LOC114301643 | 1.096561 | 1.31704  | 1.349417 | 0.13289  | 0.041853 | 0.020095 | 4.24385  | 0.559239 | 164.7908 | 5.72E-22 | 7.22E-21 |
| LOC114301649 | 13.73681 | 11.27067 | 11.74771 | 3.626372 | 3.456396 | 3.896228 | 1.637929 | 3.764656 | 482.6922 | 1.52E-35 | 5.48E-34 |
| LOC114301653 | 3.598028 | 3.139813 | 4.5463   | 8.66626  | 7.531623 | 8.592162 | -1.23651 | 2.035664 | 91.06493 | 2.8E-15  | 2.05E-14 |
| LOC114301664 | 0.2656   | 0.135938 | 0.119383 | 0.526705 | 0.725742 | 0.580746 | -1.89688 | 0.038998 | 49.47135 | 3.95E-10 | 1.84E-09 |
| LOC114301675 | 0.300156 | 0.374186 | 0.447577 | 0        | 0.015343 | 0.014733 | 4.800735 | -0.61732 | 72.79354 | 3.46E-13 | 2.12E-12 |
| LOC114301685 | 0.722797 | 0.630461 | 0.671127 | 0.203564 | 0.247705 | 0.181892 | 1.566222 | 0.496989 | 45.29316 | 1.59E-09 | 6.96E-09 |
| LOC114301701 | 0.294876 | 0.166015 | 0.246851 | 0.051051 | 0.010049 | 0.038598 | 2.749679 | -0.54754 | 43.6579  | 2.77E-09 | 1.19E-08 |
| LOC114301746 | 0.672623 | 0.70688  | 0.689769 | 2.934498 | 3.529969 | 2.403576 | -2.19265 | 0.337458 | 81.06715 | 3.66E-14 | 2.43E-13 |
| LOC114301755 | 3.628979 | 2.626857 | 3.560099 | 0.942405 | 1.576789 | 1.78131  | 1.046212 | 0.253174 | 17.85013 | 5.76E-05 | 0.00015  |
| LOC114301778 | 58.4475  | 51.69521 | 58.57732 | 103.3927 | 105.1311 | 109.4821 | -1.02035 | 6.632833 | 877.3846 | 5.48E-33 | 1.61E-31 |
| LOC114301796 | 0.549675 | 0.523713 | 0.603951 | 1.127316 | 0.988475 | 1.026669 | -1.0012  | 0.825361 | 28.62017 | 6.76E-07 | 2.25E-06 |
| LOC114301806 | 1.174032 | 1.274319 | 1.127261 | 0.346083 | 0.348187 | 0.392495 | 1.601199 | 1.206389 | 79.08201 | 6.21E-14 | 4.04E-13 |
| LOC114301814 | 1.719574 | 0.922017 | 0.899699 | 2.083919 | 2.519812 | 2.082027 | -1.00295 | 0.394332 | 19.43877 | 2.96E-05 | 8.05E-05 |
| LOC114301820 | 2.949007 | 2.837582 | 2.120856 | 0.292406 | 0.383717 | 0.073693 | 3.287776 | -0.11286 | 77.14644 | 1.05E-13 | 6.68E-13 |
| LOC114301837 | 1.936089 | 1.844642 | 1.909081 | 7.038928 | 7.247513 | 5.39015  | -1.88163 | 1.388425 | 130.0223 | 4.22E-19 | 4.21E-18 |
| LOC114301855 | 9.057983 | 7.77568  | 11.23338 | 2.934498 | 3.465788 | 3.451288 | 1.389329 | 1.147583 | 56.86189 | 3.75E-11 | 1.91E-10 |
| LOC114301875 | 0.479396 | 0.694028 | 0.451485 | 1.61842  | 1.372312 | 1.741332 | -1.64503 | -0.03208 | 38.10432 | 1.94E-08 | 7.67E-08 |
| LOC114301903 | 0.586491 | 0.466825 | 0.533298 | 0.294106 | 0.217096 | 0.236263 | 1.000439 | 0.320639 | 17.77203 | 5.96E-05 | 0.000155 |
| LOC114301899 | 0.580731 | 0.557028 | 0.614441 | 1.603047 | 1.262186 | 1.330261 | -1.34525 | 0.520335 | 40.04746 | 9.73E-09 | 3.96E-08 |
| LOC114301920 | 3.407954 | 3.568061 | 4.664154 | 0        | 0        | 0        | 8.647372 | 0.136343 | 164.8218 | 8.57E-22 | 1.07E-20 |
| LOC114301942 | 6.647093 | 5.547418 | 6.701979 | 2.416646 | 2.387809 | 2.36455  | 1.2942   | 2.343656 | 114.3857 | 1.17E-17 | 1.04E-16 |
| LOC114301958 | 2.300089 | 1.988202 | 2.425094 | 0.591274 | 0.731577 | 0.798293 | 1.53446  | 1.00499  | 63.22044 | 5.44E-12 | 2.99E-11 |
| LOC114301983 | 0.694835 | 0.764397 | 0.666917 | 0.029036 | 0        | 0.010977 | 5.628293 | 0.56739  | 204.2849 | 8.82E-25 | 1.4E-23  |
| LOC114301996 | 0.198508 | 0.141562 | 0.152676 | 0.529249 | 0.369359 | 0.472904 | -1.55188 | 0.543373 | 51.61686 | 1.97E-10 | 9.41E-10 |

|              |          |          |          |          |          |          |          |          |          |          |          |
|--------------|----------|----------|----------|----------|----------|----------|----------|----------|----------|----------|----------|
| LOC114302035 | 1.072112 | 1.094524 | 1.335037 | 0.207883 | 0.429661 | 0.255408 | 1.827405 | 0.720199 | 65.60785 | 2.69E-12 | 1.52E-11 |
| LOC114302031 | 0.229152 | 0.354784 | 0.566502 | 1.405881 | 1.885904 | 2.204625 | -2.39018 | 0.274787 | 84.92839 | 1.62E-14 | 1.11E-13 |
| LOC114302053 | 1.794288 | 2.020365 | 1.449602 | 0        | 0.151068 | 0.145063 | 3.836085 | -0.64094 | 59.62465 | 1.6E-11  | 8.44E-11 |
| LOC114302043 | 0.44886  | 0.454874 | 0.624697 | 1.849482 | 1.863105 | 2.262016 | -2.07929 | 1.363789 | 153.0418 | 4.78E-21 | 5.58E-20 |
| LOC114302044 | 0.254209 | 0.506422 | 0.257824 | 2.274982 | 2.043138 | 2.123181 | -2.76591 | 0.964378 | 175.2361 | 9.39E-23 | 1.27E-21 |
| LOC114302057 | 1.639918 | 1.538786 | 2.102154 | 4.968463 | 4.498801 | 2.817378 | -1.29426 | 0.416339 | 32.17387 | 1.75E-07 | 6.21E-07 |
| LOC114302061 | 1.585973 | 1.697976 | 2.028243 | 0        | 0        | 0        | 8.717237 | 0.199021 | 175.6014 | 1.37E-22 | 1.82E-21 |
| LOC114302078 | 2.22769  | 1.970865 | 2.36024  | 4.338796 | 3.871719 | 4.073204 | -1.00382 | 2.274011 | 74.22349 | 2.33E-13 | 1.44E-12 |
| LOC114302114 | 2.796611 | 3.070254 | 3.072754 | 0.762561 | 0.900622 | 1.24919  | 1.471819 | -0.07246 | 26.25915 | 1.72E-06 | 5.47E-06 |
| LOC114302133 | 0.166688 | 0.052136 | 0.203497 | 1.969559 | 2.20023  | 1.781858 | -3.89364 | 1.817074 | 425.4604 | 2.14E-29 | 4.85E-28 |
| LOC114302135 | 1.255562 | 1.081111 | 0.973792 | 7.384195 | 6.76546  | 7.511627 | -2.80183 | 1.79076  | 330.1918 | 1.02E-31 | 2.75E-30 |
| LOC114302160 | 3.777479 | 3.670105 | 3.604983 | 11.92858 | 13.25407 | 12.75691 | -1.88752 | 3.539209 | 633.7607 | 2.82E-42 | 1.67E-40 |
| LOC114302181 | 1.57652  | 1.123518 | 1.578704 | 0.145105 | 0.228502 | 0.21942  | 2.702391 | 0.42146  | 94.92636 | 1.08E-15 | 8.12E-15 |
| LOC114302218 | 0.648032 | 0.839135 | 0.605217 | 2.061511 | 2.597064 | 2.226638 | -1.83065 | 0.525185 | 69.31592 | 9.23E-13 | 5.42E-12 |
| LOC114302214 | 0.563014 | 0.826895 | 0.511023 | 2.180412 | 2.067148 | 2.624213 | -1.96733 | 0.884997 | 98.71834 | 4.3E-16  | 3.35E-15 |
| LOC114302232 | 3.33757  | 4.402341 | 3.352802 | 0        | 0        | 0        | 8.902909 | 0.368362 | 196.8644 | 4.53E-24 | 6.82E-23 |
| LOC114302233 | 7.714173 | 8.4147   | 8.740755 | 0        | 0        | 0        | 7.73527  | -0.66171 | 87.20309 | 9.02E-15 | 6.31E-14 |
| LOC114302236 | 0.040124 | 0.06777  | 0.06613  | 0.802331 | 0.488154 | 0.716912 | -3.55824 | -0.79658 | 68.85209 | 1.05E-12 | 6.16E-12 |
| LOC114302268 | 1.14044  | 1.191464 | 1.343476 | 3.782904 | 3.062671 | 3.79736  | -1.63611 | 2.637069 | 229.2633 | 2.28E-26 | 4.1E-25  |
| LOC114302295 | 1.49107  | 1.249445 | 1.905001 | 5.04279  | 5.112049 | 5.719051 | -1.87957 | 1.601149 | 151.4069 | 6.48E-21 | 7.48E-20 |
| LOC114302335 | 2.193147 | 2.067938 | 1.880743 | 4.375702 | 3.930172 | 4.239571 | -1.12921 | 2.419871 | 101.6251 | 2.15E-16 | 1.72E-15 |
| LOC114302372 | 1.151376 | 1.204779 | 1.162837 | 0.232555 | 0.299628 | 0.25575  | 2.03391  | 0.972119 | 98.82337 | 4.19E-16 | 3.27E-15 |
| LOC114302384 | 5.746851 | 5.795713 | 6.424119 | 0.635889 | 0.143051 | 0.274729 | 4.048532 | 1.014016 | 226.7597 | 3.24E-26 | 5.79E-25 |
| LOC114302416 | 1.418047 | 1.140512 | 1.279841 | 7.088827 | 5.871453 | 6.334129 | -2.41318 | 1.223552 | 180.133  | 4.13E-23 | 5.78E-22 |
| LOC114302459 | 6.174592 | 6.952577 | 6.94678  | 23.12073 | 21.59136 | 23.78213 | -1.87808 | 3.615906 | 656.5034 | 7.08E-43 | 4.39E-41 |
| LOC114302477 | 0.231269 | 0.173606 | 0.207048 | 0.871952 | 0.662027 | 0.765209 | -1.98833 | 0.802954 | 97.26916 | 6.09E-16 | 4.68E-15 |

|              |          |          |          |          |          |          |          |          |          |          |          |
|--------------|----------|----------|----------|----------|----------|----------|----------|----------|----------|----------|----------|
| LOC114302481 | 0.637264 | 0.734643 | 0.700189 | 0.330981 | 0.260603 | 0.354513 | 1.019096 | 0.124119 | 15.90723 | 0.000136 | 0.000336 |
| LOC114302494 | 0.644769 | 0.544507 | 0.489654 | 0.1896   | 0.284999 | 0.260639 | 1.062849 | 0.460228 | 21.79944 | 1.06E-05 | 3.06E-05 |
| LOC114302480 | 0.079368 | 0.208527 | 0.17441  | 2.260345 | 2.309849 | 2.581648 | -4.0515  | 0.558456 | 217.7887 | 1.18E-25 | 2.02E-24 |
| LOC114302623 | 5.089685 | 5.059562 | 4.492518 | 1.509763 | 1.4021   | 1.287831 | 1.70379  | 2.171495 | 165.7226 | 4.85E-22 | 6.15E-21 |
| LOC114302707 | 0.450625 | 0.328872 | 0.513459 | 0.895004 | 0.752472 | 0.894601 | -1.07071 | 1.241876 | 41.65876 | 5.53E-09 | 2.3E-08  |
| LOC114302706 | 2.217048 | 2.348676 | 2.219754 | 0        | 0        | 0        | 10.05804 | 1.43289  | 463.8776 | 1.2E-36  | 4.73E-35 |
| LOC114302702 | 5.37676  | 5.023006 | 5.550613 | 0.053703 | 0.042284 | 0.081207 | 6.267292 | 1.505608 | 452.8088 | 1.08E-36 | 4.3E-35  |
| LOC114302715 | 9.403101 | 8.62564  | 9.254542 | 0.857958 | 0.727491 | 0.997963 | 3.284373 | 2.068398 | 404.7722 | 6.84E-35 | 2.35E-33 |
| LOC114302736 | 0.384019 | 0.51348  | 0.421938 | 0.021815 | 0.034353 | 0.032987 | 3.667518 | -0.51389 | 65.03213 | 3.19E-12 | 1.79E-11 |
| LOC114302753 | 1.521162 | 1.305009 | 1.512186 | 5.793753 | 6.065129 | 6.769835 | -2.20717 | 1.700736 | 217.3333 | 1.26E-25 | 2.15E-24 |
| LOC114302758 | 13.86808 | 13.87279 | 13.73703 | 3.309807 | 4.647421 | 4.462693 | 1.612516 | 3.155181 | 309.7487 | 9.57E-31 | 2.41E-29 |
| LOC114302767 | 0        | 0        | 0.020558 | 0.476176 | 0.348145 | 0.411454 | -5.74589 | -0.52776 | 123.8466 | 1.52E-18 | 1.45E-17 |
| LOC114302781 | 20.98281 | 19.19265 | 20.76776 | 8.214891 | 7.70271  | 8.710906 | 1.201191 | 4.505328 | 427.1162 | 9.48E-36 | 3.46E-34 |
| LOC114302814 | 46.70182 | 42.89998 | 45.27309 | 18.80656 | 18.03147 | 19.7458  | 1.147572 | 6.221181 | 1056.281 | 2.25E-47 | 1.88E-45 |
| LOC114302846 | 5.749608 | 6.344045 | 6.114368 | 20.73562 | 18.47476 | 18.75597 | -1.77321 | 4.076938 | 741.2451 | 5.81E-45 | 4.09E-43 |
| LOC114302850 | 17.50942 | 14.60412 | 16.00819 | 0.392951 | 0.495034 | 0.772455 | 4.699507 | 2.535356 | 747.711  | 4.11E-45 | 2.91E-43 |
| LOC114302875 | 2.022612 | 2.316057 | 2.74966  | 6.35641  | 6.525898 | 6.596319 | -1.56915 | 1.988209 | 141.3529 | 4.4E-20  | 4.74E-19 |
| LOC114302891 | 4.048565 | 3.779212 | 4.171747 | 10.88682 | 11.66441 | 9.888968 | -1.5394  | 4.436553 | 642.7108 | 1.83E-40 | 9.53E-39 |
| LOC114302892 | 2.198314 | 2.311833 | 2.119153 | 5.918814 | 5.461724 | 4.959594 | -1.39899 | 2.500067 | 157.1284 | 2.26E-21 | 2.71E-20 |
| LOC114302934 | 6.096845 | 6.386078 | 6.215097 | 0.189916 | 0.170896 | 0.092308 | 5.285937 | 3.663757 | 2008.106 | 6.67E-63 | 1.89E-60 |
| LOC114302941 | 2.238833 | 1.966124 | 2.217709 | 0.777819 | 0.705221 | 0.867277 | 1.343037 | 3.345742 | 270.1677 | 1.02E-28 | 2.19E-27 |
| LOC114302969 | 3.50771  | 3.164359 | 3.448376 | 0.447466 | 0.35232  | 0.338316 | 3.05899  | 1.510241 | 256.1543 | 6.06E-28 | 1.22E-26 |
| LOC114302948 | 2.652968 | 2.749314 | 2.824641 | 7.596696 | 7.207903 | 6.937533 | -1.50448 | 3.704694 | 475.278  | 1.77E-37 | 7.44E-36 |
| LOC114303045 | 16.02794 | 14.58405 | 16.34324 | 31.23267 | 28.47805 | 29.88915 | -1.03537 | 4.852657 | 425.1247 | 1.13E-35 | 4.08E-34 |
| LOC114303036 | 1.164097 | 1.498024 | 0.877058 | 0.544145 | 0.428442 | 0.639974 | 1.016115 | -0.20222 | 11.76926 | 0.000915 | 0.001982 |
| LOC114303095 | 3.232711 | 3.206689 | 2.325659 | 0.209875 | 0.055083 | 0.370253 | 3.632165 | 0.427406 | 126.8051 | 1.36E-18 | 1.3E-17  |



|              |          |          |          |          |          |          |          |          |          |          |          |
|--------------|----------|----------|----------|----------|----------|----------|----------|----------|----------|----------|----------|
| LOC114303117 | 4.148814 | 4.144688 | 3.87299  | 1.587748 | 1.518026 | 2.229404 | 1.067455 | 1.537065 | 47.40289 | 7.82E-10 | 3.54E-09 |
| LOC114303139 | 0.647259 | 0.404895 | 0.592642 | 0.152522 | 0.102935 | 0.065896 | 2.292936 | -0.10625 | 49.22465 | 4.28E-10 | 1.99E-09 |
| LOC114303149 | 1.501235 | 1.543397 | 1.816807 | 3.599086 | 4.172848 | 3.917275 | -1.37834 | 1.962724 | 110.4696 | 2.81E-17 | 2.4E-16  |
| LOC114303210 | 1.563016 | 1.337018 | 1.517659 | 26.12219 | 26.67215 | 25.84511 | -4.2552  | 5.14994  | 6065.481 | 9.74E-84 | 1.63E-80 |
| LOC114303213 | 6.543984 | 6.386043 | 6.55673  | 3.002272 | 2.564596 | 2.86953  | 1.10774  | 3.170622 | 169.0006 | 2.74E-22 | 3.54E-21 |
| LOC114303215 | 0.274982 | 0.30963  | 0.226601 | 0.853943 | 1.082345 | 1.228291 | -2.08263 | 0.843419 | 106.8202 | 6.44E-17 | 5.35E-16 |
| LOC114303225 | 2.81096  | 2.152291 | 2.532585 | 7.766931 | 6.759149 | 8.344906 | -1.7049  | 1.469611 | 118.4933 | 4.78E-18 | 4.37E-17 |
| LOC114303302 | 1.676662 | 1.64975  | 1.388749 | 0.618953 | 0.50211  | 0.524695 | 1.42602  | 2.638858 | 161.6252 | 1E-21    | 1.24E-20 |
| LOC114303360 | 3.463329 | 3.273471 | 3.166457 | 7.306704 | 7.598372 | 7.087881 | -1.254   | 2.68797  | 153.0866 | 4.74E-21 | 5.54E-20 |
| LOC114303357 | 3.24933  | 3.335908 | 3.352086 | 1.135904 | 1.367864 | 1.050795 | 1.373955 | 3.203243 | 244.9885 | 2.63E-27 | 5.06E-26 |
| LOC114303383 | 3.937442 | 4.704993 | 4.237942 | 1.460728 | 0.230026 | 0.331324 | 2.679137 | 0.048861 | 64.31154 | 7.62E-12 | 4.13E-11 |
| LOC114303397 | 7.858935 | 8.064826 | 8.385375 | 17.39661 | 15.58308 | 15.56722 | -1.10048 | 4.613739 | 395.8925 | 1.54E-34 | 5.11E-33 |
| LOC114303408 | 0.300008 | 0.29883  | 0.316953 | 0.010488 | 0        | 0.007929 | 5.406427 | -0.10139 | 121.32   | 2.6E-18  | 2.44E-17 |
| LOC114303439 | 16.77762 | 16.94441 | 16.21084 | 3.009742 | 2.633077 | 2.275575 | 2.565367 | 2.976987 | 566.1782 | 2.25E-40 | 1.16E-38 |
| LOC114303485 | 7.863301 | 5.386735 | 5.981356 | 1.39942  | 0.865744 | 1.284786 | 2.349451 | 1.125355 | 126.8255 | 1.07E-18 | 1.04E-17 |
| LOC114303489 | 3.682982 | 3.644359 | 3.065641 | 11.66554 | 12.45972 | 11.19751 | -1.86634 | 2.068865 | 203.5108 | 9.92E-25 | 1.57E-23 |
| LOC114303494 | 2.781553 | 2.958021 | 3.905155 | 0.280909 | 1.216482 | 0.743354 | 1.915037 | -0.18741 | 34.73636 | 6.62E-08 | 2.47E-07 |
| LOC114303498 | 0.909461 | 1.160592 | 1.065881 | 2.479858 | 1.822386 | 2.249934 | -1.15912 | 0.726121 | 34.41159 | 7.47E-08 | 2.77E-07 |
| LOC114303502 | 3.695972 | 3.524668 | 4.24739  | 0        | 0        | 0        | 10.29153 | 1.652456 | 535.2762 | 5.89E-39 | 2.76E-37 |
| LOC114303513 | 0.566092 | 0.523009 | 0.621988 | 0.184702 | 0.166203 | 0.379043 | 1.081455 | -0.08893 | 14.47963 | 0.000259 | 0.000614 |
| LOC114303518 | 0.737454 | 0.817596 | 0.585888 | 1.381807 | 1.201659 | 1.465758 | -1.02227 | 1.487208 | 45.2809  | 1.59E-09 | 6.99E-09 |
| LOC114303527 | 2.741451 | 2.606126 | 2.765249 | 1.347987 | 1.479471 | 0.833868 | 1.056468 | 1.440144 | 41.83952 | 5.19E-09 | 2.17E-08 |
| LOC114303555 | 0.100111 | 0.084544 | 0.274991 | 1.091906 | 1.253773 | 1.100743 | -2.99416 | -0.29063 | 79.84055 | 5.07E-14 | 3.33E-13 |
| LOC114303558 | 1.007032 | 0.523346 | 0.425565 | 2.675498 | 2.771839 | 1.596997 | -1.88852 | -0.67158 | 28.52864 | 7E-07    | 2.33E-06 |
| LOC114303580 | 4.214474 | 3.954574 | 3.31861  | 1.91529  | 2.010714 | 1.448093 | 1.000257 | 0.375095 | 18.32628 | 4.68E-05 | 0.000124 |
| LOC114303581 | 1.026695 | 1.04045  | 0.902458 | 0.279952 | 0.220425 | 0.211663 | 1.959262 | -0.28309 | 35.603   | 4.81E-08 | 1.82E-07 |

|              |          |          |          |          |          |          |          |          |          |          |          |
|--------------|----------|----------|----------|----------|----------|----------|----------|----------|----------|----------|----------|
| LOC114303605 | 2.30687  | 2.232253 | 2.479209 | 6.49989  | 6.294063 | 6.093423 | -1.53186 | 4.198193 | 614.9691 | 9.14E-42 | 5.26E-40 |
| LOC114303604 | 3.225487 | 3.254733 | 3.284994 | 0        | 0        | 0        | 10.66395 | 2.007022 | 700.4443 | 2.05E-43 | 1.31E-41 |
| LOC114303610 | 1.385878 | 0.959494 | 1.244928 | 0.034044 | 0.053611 | 0.03861  | 4.666142 | 1.074727 | 265.4185 | 1.85E-28 | 3.91E-27 |
| LOC114303639 | 1.295025 | 1.567016 | 1.72022  | 0.73786  | 0.525636 | 0.717266 | 1.105474 | 0.842507 | 30.61333 | 3.12E-07 | 1.08E-06 |
| LOC114303642 | 4.255378 | 4.232814 | 4.824254 | 1.858711 | 2.044577 | 1.818643 | 1.108933 | 2.677586 | 110.0548 | 3.08E-17 | 2.63E-16 |
| LOC114303671 | 0.746803 | 1.093168 | 1.107733 | 3.52964  | 3.580789 | 4.208262 | -2.05891 | 0.975335 | 115.5473 | 9.08E-18 | 8.12E-17 |
| LOC114303726 | 0.356609 | 0.677601 | 0.661199 | 1.742177 | 1.27603  | 1.286575 | -1.43959 | 0.477663 | 40.83555 | 7.64E-09 | 3.14E-08 |
| LOC114303738 | 0.969269 | 0.60633  | 1.088642 | 0.117464 | 0.061658 | 0.088811 | 3.201611 | -0.33158 | 63.17924 | 5.51E-12 | 3.02E-11 |
| LOC114303743 | 163.7606 | 172.5781 | 162.001  | 74.37812 | 75.58051 | 80.58152 | 1.006182 | 6.23305  | 795.815  | 5.81E-37 | 2.34E-35 |
| LOC114303767 | 0.655915 | 0.608225 | 0.551109 | 1.33261  | 1.87761  | 1.325719 | -1.42386 | -0.18413 | 26.15919 | 1.79E-06 | 5.68E-06 |
| LOC114303784 | 1.197012 | 0.644616 | 0.943518 | 0.28382  | 0.372451 | 0.393411 | 1.284761 | -0.25368 | 17.29871 | 7.34E-05 | 0.000188 |
| LOC114303789 | 1.671467 | 1.378416 | 1.965842 | 4.750219 | 4.751018 | 5.209288 | -1.65768 | 2.100527 | 166.1335 | 4.52E-22 | 5.74E-21 |
| LOC114303809 | 3.180757 | 1.979264 | 4.138615 | 0.608637 | 0.47922  | 0.115043 | 2.880297 | -0.44117 | 48.41157 | 7.87E-10 | 3.55E-09 |
| LOC114303820 | 0.643519 | 1.102654 | 1.014479 | 0.101722 | 0        | 0.076909 | 3.805942 | -0.65706 | 55.92434 | 5.29E-11 | 2.66E-10 |
| LOC114303822 | 0.230613 | 0.548193 | 0.253385 | 1.583697 | 1.797075 | 1.690427 | -2.41509 | 0.303704 | 89.08837 | 4.59E-15 | 3.31E-14 |
| LOC114303883 | 2.027451 | 2.238143 | 1.179342 | 1.156249 | 0.796593 | 0.437102 | 1.135386 | 0.108916 | 16.29128 | 0.000143 | 0.000352 |
| LOC114303987 | 7.514771 | 7.037383 | 6.499159 | 3.381315 | 2.71558  | 3.425723 | 1.044422 | 2.068653 | 64.39312 | 3.84E-12 | 2.14E-11 |
| LOC114304004 | 1.302958 | 1.117812 | 1.113478 | 0.413555 | 0.532832 | 0.397952 | 1.281415 | 0.35865  | 28.70582 | 6.53E-07 | 2.18E-06 |
| LOC114304012 | 4.676616 | 5.337341 | 5.487153 | 1.000147 | 0.514892 | 0.814349 | 2.649773 | 2.100868 | 293.7071 | 8.5E-30  | 1.98E-28 |
| LOC114304030 | 2.825796 | 3.266314 | 3.242201 | 0.227292 | 0.178962 | 0.206218 | 3.808102 | 1.07423  | 233.9023 | 1.19E-26 | 2.2E-25  |
| LOC114304049 | 5.390258 | 5.216287 | 5.73222  | 2.479145 | 2.354788 | 2.528961 | 1.043596 | 2.472507 | 85.39833 | 1.18E-14 | 8.16E-14 |
| LOC114304073 | 2.918589 | 2.731491 | 2.45714  | 1.033534 | 1.139278 | 0.937709 | 1.275929 | 0.661703 | 35.84036 | 4.41E-08 | 1.68E-07 |
| LOC114304094 | 1.932645 | 1.332339 | 1.473434 | 0.430188 | 0.395168 | 0.596296 | 1.61441  | -0.17421 | 27.86576 | 9.08E-07 | 2.98E-06 |
| LOC114304116 | 9.419719 | 11.14773 | 10.40264 | 3.756657 | 4.53998  | 3.566882 | 1.271184 | 2.183007 | 97.54035 | 5.71E-16 | 4.41E-15 |
| LOC114304200 | 1.247818 | 0.59789  | 0.904297 | 2.123525 | 2.507989 | 2.663726 | -1.50407 | 0.969123 | 62.8003  | 8E-12    | 4.33E-11 |
| LOC114304208 | 0.041923 | 0.036715 | 0.046063 | 0.321771 | 0.286688 | 0.416139 | -3.12856 | 0.346183 | 138.8123 | 7.23E-20 | 7.68E-19 |

|              |          |          |          |          |          |          |          |          |          |          |          |
|--------------|----------|----------|----------|----------|----------|----------|----------|----------|----------|----------|----------|
| LOC114304222 | 0.364665 | 0.424299 | 0.480807 | 0        | 0        | 0        | 7.750538 | -0.64776 | 87.39292 | 8.6E-15  | 6.03E-14 |
| LOC114304227 | 3.367219 | 2.317016 | 2.877547 | 1.303547 | 1.115618 | 0.857019 | 1.306623 | 1.956848 | 80.77822 | 1.82E-13 | 1.14E-12 |
| LOC114304275 | 3.778798 | 2.836612 | 3.300246 | 9.511171 | 8.944928 | 11.71884 | -1.70847 | 2.083008 | 169.0936 | 2.69E-22 | 3.49E-21 |
| LOC114304314 | 3.087753 | 2.05257  | 2.289012 | 4.733841 | 5.111681 | 4.652848 | -1.05922 | 1.59818  | 51.65353 | 1.94E-10 | 9.31E-10 |
| LOC114304322 | 1.178963 | 1.102508 | 1.295376 | 18.52548 | 18.67624 | 20.76266 | -4.12287 | 3.99162  | 2505.235 | 5.09E-67 | 2.02E-64 |
| LOC114304321 | 2.96395  | 2.661974 | 2.675077 | 26.42652 | 26.26171 | 28.61255 | -3.39382 | 3.709732 | 1745.21  | 2.61E-60 | 6.1E-58  |
| LOC114304363 | 11.81427 | 12.18477 | 10.77654 | 2.946997 | 2.929462 | 3.314351 | 1.80841  | 3.437866 | 482.7721 | 9.81E-38 | 4.18E-36 |
| LOC114304411 | 1.838781 | 1.690174 | 1.772956 | 0.750374 | 0.698241 | 0.876791 | 1.073844 | 0.156191 | 18.12588 | 5.11E-05 | 0.000134 |
| LOC114304418 | 0.337158 | 0.18982  | 0.092612 | 5.516036 | 5.12732  | 5.213135 | -4.70595 | 0.993453 | 334.6389 | 6.4E-32  | 1.75E-30 |
| LOC114304421 | 2.226221 | 1.850198 | 2.096607 | 7.66015  | 7.624531 | 7.758569 | -2.00031 | 2.496514 | 303.9651 | 1.84E-30 | 4.49E-29 |
| LOC114304439 | 0.921008 | 0.95728  | 1.037897 | 0.214645 | 0.202805 | 0.032457 | 2.622521 | -0.28431 | 51.21922 | 2.24E-10 | 1.07E-09 |
| LOC114304451 | 1.74467  | 1.366605 | 1.396034 | 0        | 0.027143 | 0.026064 | 5.994647 | 0.413649 | 189.0054 | 9.66E-24 | 1.42E-22 |
| LOC114304454 | 1.783135 | 2.007806 | 1.843958 | 1.089553 | 0.707749 | 0.844373 | 1.007431 | 1.511408 | 41.33438 | 6.19E-09 | 2.56E-08 |
| LOC114304506 | 2.549137 | 2.084761 | 2.845068 | 0.658498 | 0.710509 | 0.774465 | 1.686474 | 1.878133 | 130.5266 | 3.81E-19 | 3.81E-18 |
| LOC114304501 | 3.528025 | 2.804152 | 4.241225 | 1.584467 | 1.544594 | 1.59729  | 1.054628 | 0.956064 | 30.29881 | 3.53E-07 | 1.21E-06 |
| LOC114304498 | 0.468548 | 0.362714 | 0.38611  | 0.692036 | 1.005943 | 1.046455 | -1.28785 | -0.43567 | 18.05076 | 5.28E-05 | 0.000138 |
| LOC114304534 | 0.193784 | 0.181834 | 0.10646  | 4.227187 | 4.992518 | 5.459916 | -4.9947  | 1.264787 | 427.3192 | 9.31E-36 | 3.41E-34 |
| LOC114304544 | 0.673716 | 0.672398 | 0.841182 | 0.027834 | 0.043831 | 0.021044 | 4.349612 | -0.21121 | 96.72778 | 6.94E-16 | 5.31E-15 |
| LOC114304581 | 0        | 0        | 0        | 1.805082 | 1.421261 | 1.417259 | -8.06169 | -0.66664 | 130.5217 | 5.24E-19 | 5.19E-18 |
| LOC114304584 | 0.419979 | 0.433487 | 0.397358 | 0.148448 | 0.133581 | 0.160339 | 1.38211  | -0.27769 | 20.25503 | 2.04E-05 | 5.66E-05 |
| LOC114304617 | 0.768529 | 1.006235 | 0.88369  | 0.227427 | 0.281393 | 0.442158 | 1.327211 | 0.154705 | 25.36465 | 2.46E-06 | 7.68E-06 |
| LOC114304635 | 2.50603  | 2.477665 | 3.089271 | 0        | 0        | 0        | 8.091146 | -0.35593 | 112.2007 | 2.49E-17 | 2.14E-16 |
| LOC114304663 | 1.44049  | 1.446638 | 2.866018 | 4.317074 | 3.733459 | 3.638567 | -1.12298 | 1.203268 | 37.0172  | 1.34E-07 | 4.84E-07 |
| LOC114304669 | 2.671935 | 2.005729 | 2.392106 | 6.835919 | 9.348333 | 8.432704 | -1.90977 | 1.718069 | 164.3862 | 6.14E-22 | 7.74E-21 |
| LOC114304692 | 1.149875 | 1.485162 | 0.966141 | 0        | 0.048406 | 0.092964 | 4.308577 | -0.57972 | 68.42482 | 1.19E-12 | 6.92E-12 |
| LOC114304697 | 5.28188  | 5.234795 | 5.937141 | 18.05262 | 16.23464 | 17.76382 | -1.76492 | 3.847341 | 688.3191 | 1.1E-43  | 7.18E-42 |

|              |          |          |          |          |          |          |          |          |          |          |          |
|--------------|----------|----------|----------|----------|----------|----------|----------|----------|----------|----------|----------|
| LOC114304703 | 8.534156 | 7.776712 | 8.603486 | 27.9884  | 28.77419 | 29.8675  | -1.90381 | 3.698715 | 728.4459 | 1.16E-44 | 8.09E-43 |
| LOC114304718 | 1.182744 | 1.272136 | 1.221946 | 0.192539 | 0.277931 | 0.291146 | 2.124548 | 0.454529 | 71.58516 | 4.86E-13 | 2.93E-12 |
| LOC114304720 | 1.609955 | 1.641786 | 1.268285 | 2.871391 | 3.173867 | 2.964211 | -1.10031 | 1.200742 | 43.85939 | 2.59E-09 | 1.11E-08 |
| LOC114304743 | 0.481247 | 0.402939 | 0.610115 | 6.482654 | 5.298502 | 5.749321 | -3.64433 | 2.985391 | 995.3934 | 9.18E-50 | 9.35E-48 |
| LOC114304839 | 4.206669 | 4.156696 | 4.181849 | 1.820708 | 2.170826 | 1.69123  | 1.033263 | 1.713007 | 51.10116 | 2.32E-10 | 1.11E-09 |
| LOC114304836 | 2.2581   | 2.188067 | 2.179584 | 4.317423 | 4.332939 | 4.544016 | -1.09957 | 4.487199 | 386.8006 | 3.58E-34 | 1.15E-32 |
| LOC114304843 | 0.084815 | 0.068215 | 0.133128 | 4.184836 | 4.144762 | 4.046625 | -5.51255 | 2.424222 | 989.3792 | 5.01E-50 | 5.19E-48 |
| LOC114304844 | 0.091591 | 0.171886 | 0.26836  | 7.714331 | 7.996712 | 7.343167 | -5.52557 | 1.984517 | 729.2724 | 1.11E-44 | 7.75E-43 |
| LOC114304845 | 4.211202 | 4.109563 | 2.776214 | 13.43915 | 15.13562 | 16.33467 | -2.12319 | 1.619035 | 185.5979 | 1.68E-23 | 2.43E-22 |
| LOC114304855 | 0.037928 | 0.128119 | 0.187527 | 0.930766 | 1.085709 | 0.964362 | -3.18532 | -0.12894 | 96.78029 | 6.86E-16 | 5.25E-15 |
| LOC114304856 | 2.254261 | 1.968472 | 2.123015 | 0.585406 | 1.185247 | 0.948446 | 1.077172 | 0.120758 | 17.28628 | 7.38E-05 | 0.000189 |
| LOC114304857 | 2.410679 | 2.895381 | 2.737004 | 0        | 0        | 0.110441 | 5.564278 | -0.68425 | 75.80513 | 1.51E-13 | 9.5E-13  |
| LOC114304985 | 0.377005 | 0.515473 | 0.621347 | 1.2238   | 0.84795  | 0.925278 | -1.07176 | -0.16726 | 15.16323 | 0.00019  | 0.000459 |
| LOC114305021 | 2.257387 | 1.596022 | 2.018837 | 7.348175 | 6.311679 | 6.060799 | -1.82969 | 1.319831 | 119.7864 | 3.62E-18 | 3.35E-17 |
| LOC114305050 | 4.951665 | 5.428839 | 5.512188 | 0.769843 | 0.419641 | 0.537282 | 3.120554 | 1.489376 | 252.1229 | 1.02E-27 | 2.03E-26 |
| LOC114305058 | 4.030011 | 2.88768  | 3.673178 | 0.083248 | 0.131094 | 0.251766 | 4.28804  | 0.415439 | 153.6119 | 4.3E-21  | 5.05E-20 |
| LOC114305069 | 0        | 0        | 0        | 6.042342 | 5.186496 | 7.077325 | -10.5438 | 1.780487 | 746.2461 | 3.55E-43 | 2.24E-41 |
| LOC114305085 | 0.865905 | 0.780006 | 1.277602 | 5.171913 | 4.178421 | 4.318361 | -2.31728 | 1.776128 | 229.353  | 2.75E-26 | 4.92E-25 |
| LOC114305172 | 1.955859 | 2.351601 | 2.367525 | 0        | 0.047448 | 0        | 6.568995 | 0.188707 | 163.1266 | 7.68E-22 | 9.59E-21 |
| LOC114305177 | 0.534688 | 0.602058 | 1.091042 | 2.152213 | 1.9679   | 2.519572 | -1.68818 | 0.276784 | 48.17504 | 6.06E-10 | 2.77E-09 |
| LOC114305182 | 21.67795 | 23.89814 | 19.45383 | 7.117954 | 9.99052  | 8.423483 | 1.226881 | 3.00679  | 151.9766 | 5.07E-19 | 5.02E-18 |
| LOC114305184 | 2.348064 | 2.754078 | 2.902405 | 6.491466 | 4.621051 | 5.445864 | -1.14102 | 1.364203 | 51.11692 | 2.31E-10 | 1.1E-09  |
| LOC114305208 | 0.34965  | 0.447392 | 0.314325 | 1.155639 | 1.02365  | 1.004805 | -1.61275 | 0.486179 | 54.00685 | 9.17E-11 | 4.52E-10 |
| LOC114305218 | 0.930488 | 0.765647 | 0.9044   | 1.886629 | 1.485468 | 1.721545 | -1.05582 | 0.178976 | 19.73167 | 2.55E-05 | 7E-05    |
| LOC114305235 | 2.40267  | 2.705401 | 2.089932 | 0.272977 | 0.071644 | 0.068796 | 4.057838 | -0.18815 | 90.88186 | 2.93E-15 | 2.14E-14 |
| LOC114305324 | 13.75958 | 15.02846 | 13.60641 | 0        | 0        | 0        | 10.31025 | 1.671365 | 547.5621 | 2.51E-39 | 1.21E-37 |

|              |          |          |          |          |          |          |          |          |          |          |          |
|--------------|----------|----------|----------|----------|----------|----------|----------|----------|----------|----------|----------|
| LOC114306056 | 0.065083 | 0.048856 | 0.214529 | 2.090135 | 2.018314 | 2.027539 | -4.29605 | 0.603584 | 229.2575 | 2.28E-26 | 4.1E-25  |
| LOC114312073 | 0.306897 | 0.172783 | 0.273976 | 13.04055 | 12.68362 | 13.26033 | -5.76797 | 3.419338 | 2264.943 | 3.87E-65 | 1.37E-62 |
| LOC114319233 | 2.393393 | 2.882105 | 2.830603 | 1.027263 | 0.8802   | 1.07365  | 1.333397 | 1.776585 | 83.06233 | 2.16E-14 | 1.46E-13 |
| LOC114320327 | 1.607811 | 1.868791 | 2.051499 | 0.282843 | 0.742337 | 1.211812 | 1.111164 | -0.2338  | 13.19403 | 0.000472 | 0.001074 |
| LOC114322995 | 25.41654 | 26.40165 | 25.66193 | 0.083248 | 0.262187 | 0.125883 | 7.149446 | 3.082438 | 1478.801 | 2.85E-57 | 5.52E-55 |
| LOC114260717 | 8.716519 | 8.429874 | 8.49022  | 2.089995 | 1.836939 | 1.506685 | 2.148627 | 2.552237 | 308.6514 | 1.08E-30 | 2.7E-29  |
| LOC114256532 | 1.46236  | 1.796307 | 1.801515 | 0.322219 | 0.317131 | 0.548146 | 1.934797 | -0.30305 | 33.8669  | 9.14E-08 | 3.36E-07 |
| LOC114288520 | 5.398508 | 4.641922 | 4.637406 | 1.427422 | 0.983416 | 0.809423 | 2.111786 | 0.028025 | 50.47903 | 2.84E-10 | 1.34E-09 |
| LOC114291234 | 0.545238 | 0.641223 | 0.625701 | 0.088102 | 0.052026 | 0.066611 | 3.018816 | -0.0786  | 75.46075 | 1.66E-13 | 1.04E-12 |
| LOC114291457 | 2.570913 | 3.568061 | 3.021846 | 5.868997 | 4.792201 | 6.656056 | -1.03049 | 1.19078  | 37.00556 | 2.89E-08 | 1.12E-07 |
| LOC114296720 | 1.426547 | 1.63758  | 1.516517 | 0.134712 | 0.278428 | 0.101852 | 3.02025  | 1.514654 | 229.119  | 2.03E-25 | 3.43E-24 |
| LOC114302297 | 1.010393 | 0.736159 | 1.044857 | 0.324126 | 0.340275 | 0.530967 | 1.088769 | -0.38071 | 11.93699 | 0.000845 | 0.00184  |
| LOC114302804 | 5.317674 | 5.160123 | 6.222767 | 1.964753 | 1.794497 | 2.257945 | 1.35881  | 1.44583  | 69.7135  | 8.25E-13 | 4.87E-12 |
| LOC114306259 | 1.494074 | 1.56071  | 1.760271 | 0.589003 | 0.644113 | 0.519549 | 1.348764 | 0.944889 | 48.41862 | 5.59E-10 | 2.56E-09 |
| LOC114306435 | 1.109392 | 1.035351 | 1.054214 | 0.436038 | 0.243186 | 0.357148 | 1.543928 | 1.149092 | 69.22663 | 9.47E-13 | 5.56E-12 |
| LOC114308499 | 0.37052  | 0.273341 | 0.37201  | 0.011613 | 0.045717 | 0.03512  | 3.251237 | -0.01745 | 83.99356 | 1.7E-14  | 1.16E-13 |
| LOC114308539 | 0.185437 | 0.193887 | 0.247407 | 1.540988 | 1.23228  | 1.074071 | -2.69462 | 0.784773 | 151.1982 | 6.74E-21 | 7.77E-20 |
| LOC114309617 | 0.043799 | 0.049317 | 0        | 3.264345 | 2.38217  | 2.829254 | -6.29594 | -0.00732 | 195.6295 | 3.37E-24 | 5.11E-23 |
| LOC114310204 | 3.974271 | 3.420194 | 3.789669 | 7.714749 | 7.760521 | 8.388435 | -1.19869 | 3.653646 | 297.9699 | 3.65E-30 | 8.78E-29 |
| LOC114310687 | 1.042774 | 1.083841 | 1.880187 | 0.194418 | 0.535774 | 0.440981 | 1.597953 | 0.104635 | 30.02036 | 6.39E-07 | 2.14E-06 |
| LOC114310756 | 0        | 0        | 0        | 4.700827 | 4.565643 | 4.894941 | -10.9867 | 2.230505 | 1060.602 | 1.51E-50 | 1.66E-48 |
| LOC114311086 | 59.42897 | 61.49119 | 62.765   | 2.348505 | 1.199438 | 1.679654 | 5.061191 | 4.726788 | 3434.344 | 5.88E-55 | 8.94E-53 |
| LOC114311291 | 10.83183 | 9.939976 | 9.568295 | 28.71146 | 24.10898 | 24.46234 | -1.44734 | 4.52483  | 582.1484 | 3.61E-37 | 1.47E-35 |
| LOC114314010 | 0.939807 | 0.671886 | 0.819528 | 0.32541  | 0.384325 | 0.389551 | 1.029629 | 0.359924 | 19.21755 | 3.18E-05 | 8.6E-05  |
| LOC114314071 | 0        | 0        | 0.031088 | 1.182984 | 1.174427 | 1.011082 | -6.36045 | -0.67317 | 120.2668 | 3.26E-18 | 3.03E-17 |
| LOC114316906 | 1.125734 | 1.041222 | 1.303153 | 3.654256 | 3.049873 | 3.425962 | -1.64217 | 1.790922 | 136.598  | 1.12E-19 | 1.17E-18 |

|              |          |          |          |          |          |          |          |          |          |          |          |
|--------------|----------|----------|----------|----------|----------|----------|----------|----------|----------|----------|----------|
| LOC114316945 | 2.345019 | 2.085984 | 2.009724 | 5.328531 | 5.403812 | 5.511318 | -1.43667 | 2.306815 | 150.6121 | 7.52E-21 | 8.62E-20 |
| LOC114316951 | 2.645553 | 1.88905  | 3.11947  | 7.741546 | 6.372498 | 7.715514 | -1.60515 | 1.229604 | 87.60697 | 6.69E-15 | 4.74E-14 |
| LOC114316769 | 3.628759 | 3.458348 | 3.037172 | 8.230036 | 7.310413 | 7.426328 | -1.27941 | 3.890523 | 367.9292 | 5.2E-33  | 1.54E-31 |
| LOC114317189 | 0.402824 | 0.289787 | 0.55325  | 0.040681 | 0.048047 | 0        | 3.692821 | -0.49521 | 60.70673 | 1.85E-11 | 9.68E-11 |
| LOC114317669 | 2.655917 | 2.180032 | 2.563623 | 0.045121 | 0        | 0        | 7.141791 | 0.70218  | 249.4006 | 1.47E-27 | 2.87E-26 |
| LOC114317825 | 0.803957 | 0.838198 | 0.883341 | 3.843072 | 4.048747 | 4.542605 | -2.40821 | 1.365664 | 200.2451 | 1.64E-24 | 2.55E-23 |
| LOC114318138 | 2.898336 | 3.211717 | 3.133974 | 0        | 0        | 0        | 8.694235 | 0.178271 | 175.0971 | 1.49E-22 | 1.97E-21 |
| LOC114319328 | 1.847002 | 1.412155 | 1.628513 | 0.310881 | 0.163185 | 0.250718 | 2.673333 | 1.360333 | 184.0841 | 2.15E-23 | 3.08E-22 |
| LOC114320278 | 1.419029 | 1.456839 | 1.284002 | 3.034754 | 2.26999  | 2.753382 | -1.04353 | 0.605871 | 26.15807 | 1.79E-06 | 5.69E-06 |
| LOC114320150 | 6.134157 | 5.697054 | 6.985835 | 0        | 0        | 0        | 9.759269 | 1.151791 | 369.8606 | 4.23E-33 | 1.25E-31 |
| LOC114320920 | 7.491751 | 6.052277 | 7.316889 | 3.285773 | 3.199844 | 3.203406 | 1.004054 | 2.698487 | 91.7133  | 2.38E-15 | 1.75E-14 |
| LOC114321624 | 9.284769 | 9.260153 | 9.936138 | 1.603797 | 1.638602 | 1.761131 | 2.397405 | 3.981238 | 1094.136 | 8.03E-52 | 1E-49    |
| LOC114321333 | 2.652091 | 3.131526 | 2.913963 | 0.65149  | 1.06696  | 1.182173 | 1.439196 | 2.048548 | 105.5302 | 2.26E-16 | 1.8E-15  |
| LOC114321697 | 0.932187 | 0.805538 | 1.000413 | 0.039408 | 0        | 0        | 5.904422 | -0.39613 | 98.31186 | 4.74E-16 | 3.69E-15 |
| LOC114321908 | 0.629968 | 0.520185 | 0.622955 | 2.519374 | 1.863448 | 2.395459 | -2.02081 | 1.060921 | 118.8036 | 4.47E-18 | 4.1E-17  |
| LOC114322003 | 0.552908 | 0.622573 | 0.486003 | 2.613229 | 2.690667 | 2.963675 | -2.40974 | -0.08828 | 71.25173 | 5.34E-13 | 3.2E-12  |
| LOC114322252 | 1.116866 | 0.789075 | 0.890283 | 0.039809 | 0.031344 | 0.030098 | 4.581667 | -0.35508 | 89.31948 | 4.33E-15 | 3.12E-14 |
| LOC114322358 | 0.627781 | 0.201966 | 0.369519 | 1.018923 | 1.283625 | 1.170973 | -1.61403 | 0.135245 | 38.65146 | 2.04E-08 | 8.02E-08 |
| LOC114322753 | 1.553273 | 1.644043 | 1.570114 | 4.913016 | 3.646025 | 3.970761 | -1.48202 | 1.510184 | 93.23306 | 1.63E-15 | 1.21E-14 |
| LOC114322942 | 0.493812 | 0.506606 | 0.482286 | 1.077194 | 1.020917 | 0.950173 | -1.13654 | 1.090133 | 43.9062  | 2.55E-09 | 1.09E-08 |
| LOC114323271 | 0.052866 | 0.059527 | 0.174257 | 2.114212 | 2.042991 | 1.961785 | -4.4145  | -0.65228 | 97.36754 | 5.95E-16 | 4.59E-15 |
| LOC114256745 | 0.220037 | 0.195601 | 0.190866 | 0.884184 | 0.91166  | 0.732172 | -2.14416 | 0.482303 | 88.554   | 5.26E-15 | 3.77E-14 |
| LOC114257003 | 2.4323   | 2.860487 | 2.820939 | 0.098255 | 0.038681 | 0.037144 | 5.416765 | 0.728787 | 231.7643 | 1.6E-26  | 2.93E-25 |
| LOC114257226 | 0.945983 | 1.198321 | 1.47247  | 1.970407 | 2.425875 | 2.275277 | -1.00604 | 1.426874 | 41.20613 | 6.48E-09 | 2.68E-08 |
| LOC114257980 | 1.160448 | 0.928418 | 1.191149 | 0.305321 | 0.185763 | 0.304294 | 1.94905  | 1.468761 | 124.6542 | 1.29E-18 | 1.23E-17 |
| LOC114258719 | 1.585973 | 1.830447 | 0.566337 | 9.0815   | 5.674975 | 5.885355 | -2.44077 | 1.661096 | 34.98395 | 0.002553 | 0.005152 |

|              |          |          |          |          |          |          |          |          |          |          |          |
|--------------|----------|----------|----------|----------|----------|----------|----------|----------|----------|----------|----------|
| LOC114258713 | 3.585678 | 2.329307 | 2.424452 | 8.39835  | 7.00736  | 6.539283 | -1.46998 | 1.172821 | 70.65284 | 6.32E-13 | 3.77E-12 |
| LOC114261138 | 1.223695 | 1.679289 | 1.680656 | 0.417086 | 0.273666 | 0.367904 | 2.000457 | -0.24931 | 36.87552 | 3.03E-08 | 1.17E-07 |
| LOC114261154 | 5.167121 | 3.969403 | 4.403911 | 1.843467 | 1.036774 | 1.991128 | 1.380563 | 1.005017 | 49.82293 | 3.52E-10 | 1.65E-09 |
| LOC114260873 | 0.212357 | 0.263025 | 0.396654 | 2.277562 | 1.975643 | 2.33491  | -3.01679 | 0.845087 | 187.6518 | 1.2E-23  | 1.76E-22 |
| LOC114261618 | 11.41325 | 11.84921 | 11.51093 | 0.170292 | 0.156429 | 0.17167  | 6.000573 | 3.482431 | 1985.271 | 1.09E-62 | 2.98E-60 |
| LOC114262276 | 17.21413 | 16.63944 | 16.7567  | 4.429345 | 3.863869 | 4.047584 | 1.936807 | 4.154898 | 843.0246 | 3.35E-47 | 2.76E-45 |
| LOC114262298 | 0.796799 | 0.598129 | 0.915271 | 0.21946  | 0.241914 | 0.248891 | 1.582868 | 0.440299 | 42.89667 | 3.6E-09  | 1.53E-08 |
| LOC114262822 | 0.073857 | 0.041581 | 0.020287 | 1.577533 | 1.162813 | 1.446496 | -4.92417 | 0.251902 | 204.3287 | 8.76E-25 | 1.39E-23 |
| LOC114263215 | 0.67499  | 0.488595 | 0.450281 | 0        | 0        | 0        | 8.123407 | -0.33309 | 111.899  | 2.66E-17 | 2.28E-16 |
| LOC114262970 | 4.122799 | 3.938099 | 3.728253 | 0.31578  | 0.447542 | 0.334252 | 3.302038 | 2.489776 | 526.5871 | 3.63E-39 | 1.73E-37 |
| LOC114263850 | 0.101119 | 0.11386  | 0.111104 | 6.157851 | 6.947083 | 6.948903 | -5.95611 | 1.041061 | 418.0229 | 2.1E-35  | 7.45E-34 |
| LOC114265214 | 6.717657 | 5.464652 | 6.266293 | 0.398743 | 0.353201 | 0.188423 | 4.21041  | 1.85909  | 433.2888 | 5.58E-36 | 2.08E-34 |
| LOC114265334 | 0        | 0        | 0        | 11.56104 | 9.752972 | 11.34242 | -9.89782 | 1.132479 | 495.9522 | 1.02E-37 | 4.32E-36 |
| LOC114265743 | 7.008615 | 6.810084 | 6.058893 | 17.97885 | 17.46579 | 18.82521 | -1.55295 | 3.412705 | 412.0268 | 3.57E-35 | 1.25E-33 |
| LOC114266934 | 0.954308 | 1.529866 | 1.332887 | 0.147014 | 0.277809 | 0.222305 | 2.397449 | 0.579307 | 85.8252  | 1.5E-14  | 1.03E-13 |
| LOC114267770 | 2.071677 | 1.683258 | 1.888243 | 0.89869  | 0.657056 | 0.728006 | 1.219409 | 1.788876 | 70.90904 | 5.88E-13 | 3.51E-12 |
| LOC114267920 | 0.153048 | 0.114888 | 0.056053 | 0.741905 | 0.705849 | 0.607676 | -2.71267 | -0.44024 | 63.32465 | 5.27E-12 | 2.9E-11  |
| LOC114267953 | 0        | 0        | 0        | 4.533761 | 4.555403 | 5.090597 | -10.7264 | 1.965012 | 882.7223 | 2.34E-47 | 1.95E-45 |
| LOC114268264 | 9.929231 | 8.232255 | 8.901415 | 0        | 0        | 0        | 10.1449  | 1.511249 | 485.2864 | 2.27E-37 | 9.43E-36 |
| LOC114268368 | 0        | 0        | 0        | 2.030293 | 1.726471 | 1.842052 | -9.11225 | 0.346639 | 283.0138 | 4.21E-29 | 9.33E-28 |
| LOC114268693 | 0.268485 | 0.177831 | 0.26029  | 0.77515  | 0.655537 | 0.651186 | -1.63304 | -0.10415 | 35.94095 | 4.25E-08 | 1.62E-07 |
| LOC114269151 | 0.071576 | 0        | 0        | 4.684045 | 3.380721 | 4.328457 | -6.89429 | -0.16987 | 179.2084 | 4.82E-23 | 6.68E-22 |
| LOC114269856 | 0.572155 | 0.429497 | 0.607695 | 2.842873 | 3.19379  | 2.857142 | -2.56365 | 1.496621 | 236.833  | 7.96E-27 | 1.48E-25 |
| LOC114270328 | 4.952239 | 4.555564 | 4.688204 | 0.200944 | 0.063287 | 0.091157 | 5.256364 | 1.760674 | 484.8444 | 8.34E-38 | 3.58E-36 |
| LOC114271437 | 1.387542 | 1.341428 | 1.616947 | 10.64973 | 9.448437 | 9.419609 | -2.86267 | 3.634485 | 1261.358 | 2.21E-54 | 3.24E-52 |
| LOC114271544 | 0.017288 | 0.048666 | 0.037991 | 2.514162 | 2.548692 | 2.518668 | -6.26509 | 2.189443 | 910.6497 | 1.47E-48 | 1.35E-46 |

|              |          |          |          |          |          |          |          |          |          |          |          |
|--------------|----------|----------|----------|----------|----------|----------|----------|----------|----------|----------|----------|
| LOC114271535 | 0        | 0        | 0        | 2.052798 | 1.928223 | 1.82435  | -9.33926 | 0.572437 | 334.2982 | 1.45E-31 | 3.86E-30 |
| LOC114272202 | 0.376669 | 0.455545 | 0.367877 | 1.546952 | 1.27792  | 0.920344 | -1.71962 | 0.862169 | 73.89137 | 2.89E-13 | 1.78E-12 |
| LOC114272257 | 0.867698 | 0.651351 | 0.685762 | 0        | 0.010894 | 0        | 7.104378 | 0.664834 | 238.5212 | 6.32E-27 | 1.18E-25 |
| LOC114273398 | 1.579947 | 1.8048   | 1.937224 | 0.457865 | 0.163867 | 0.566473 | 2.051693 | 0.613281 | 70.23351 | 8.99E-13 | 5.28E-12 |
| LOC114273676 | 1.419415 | 1.283847 | 1.585138 | 4.272206 | 4.163109 | 3.869707 | -1.61939 | 1.86777  | 140.9242 | 4.78E-20 | 5.14E-19 |
| LOC114274315 | 2.043938 | 1.906932 | 2.309925 | 5.732508 | 4.43     | 5.217064 | -1.38774 | 0.932467 | 56.46195 | 4.24E-11 | 2.15E-10 |
| LOC114276654 | 0.272423 | 0.237482 | 0.270356 | 0.527166 | 0.566008 | 0.48312  | -1.11172 | 0.486641 | 27.42652 | 1.08E-06 | 3.51E-06 |
| LOC114276894 | 1.325873 | 1.662582 | 1.8541   | 0        | 0        | 0        | 8.368229 | -0.11015 | 135.1209 | 2.09E-19 | 2.15E-18 |
| LOC114276885 | 1.145571 | 0.869287 | 1.176598 | 0.226352 | 0.106933 | 0.102683 | 2.804875 | -0.25285 | 58.94833 | 1.97E-11 | 1.03E-10 |
| LOC114277190 | 0.208456 | 0.247761 | 0.292661 | 0.505248 | 0.596723 | 0.44567  | -1.15385 | 0.069761 | 21.21691 | 1.36E-05 | 3.86E-05 |
| LOC114277194 | 0.847912 | 1.468842 | 1.146629 | 3.379119 | 3.080701 | 2.778959 | -1.52019 | 1.002294 | 66.70478 | 1.96E-12 | 1.12E-11 |
| LOC114277564 | 8.692352 | 8.654272 | 8.042653 | 0.027721 | 0        | 0.041918 | 8.27328  | 3.055062 | 1451.757 | 6.19E-57 | 1.13E-54 |
| LOC114282048 | 3.705215 | 4.067046 | 3.977915 | 1.40257  | 1.237828 | 1.188626 | 1.520066 | 3.203253 | 298.6533 | 3.38E-30 | 8.12E-29 |
| LOC114283197 | 0.627928 | 0.556103 | 0.596906 | 0        | 0        | 0        | 9.0276   | 0.476359 | 223.0089 | 9.62E-26 | 1.66E-24 |
| LOC114283207 | 2.005514 | 1.610281 | 1.850232 | 3.999466 | 3.694072 | 3.837995 | -1.1745  | 3.355632 | 230.0689 | 2.03E-26 | 3.68E-25 |
| LOC114283304 | 0.613558 | 0.505986 | 0.503233 | 0.219926 | 0.111319 | 0.190034 | 1.556905 | 0.425994 | 41.1715  | 6.56E-09 | 2.71E-08 |
| LOC114283460 | 0.2923   | 0.246847 | 0.240872 | 0.096609 | 0.085575 | 0.146086 | 1.122526 | -0.09941 | 15.79793 | 0.000143 | 0.000352 |
| LOC114284332 | 0.123751 | 0.162568 | 0.203956 | 1.274763 | 1.712203 | 1.70084  | -3.36593 | 0.374427 | 155.668  | 2.95E-21 | 3.52E-20 |
| LOC114284599 | 3.937721 | 3.504753 | 3.488774 | 14.0883  | 13.32016 | 15.04451 | -2.06056 | 4.711836 | 1320.779 | 3.25E-55 | 5.06E-53 |
| LOC114284999 | 6.834399 | 6.704429 | 7.338575 | 0.094119 | 0        | 0        | 7.573252 | 1.10202  | 344.9933 | 2.18E-32 | 6.15E-31 |
| LOC114285743 | 0.43313  | 0.330942 | 0.322931 | 1.377868 | 0.952044 | 0.956723 | -1.65949 | 0.542732 | 57.32259 | 3.25E-11 | 1.66E-10 |
| LOC114286014 | 0.105855 | 0.039731 | 0.135692 | 1.699764 | 1.641357 | 1.188148 | -4.04779 | 0.472683 | 195.0293 | 3.7E-24  | 5.59E-23 |
| LOC114286525 | 2.99822  | 3.12821  | 3.362271 | 0.312513 | 0.305117 | 0.340246 | 3.193826 | 2.926051 | 727.9283 | 1.2E-44  | 8.29E-43 |
| LOC114286708 | 3.758444 | 3.563789 | 5.361182 | 1.678079 | 1.887519 | 1.903117 | 1.091785 | 0.56067  | 24.10741 | 4.1E-06  | 1.24E-05 |
| LOC114286763 | 3.417421 | 2.686346 | 2.597704 | 1.484691 | 1.230522 | 1.152071 | 1.085138 | 1.59282  | 49.44787 | 3.98E-10 | 1.85E-09 |
| LOC114287085 | 1.542793 | 1.498973 | 1.666785 | 0.609679 | 0.731139 | 0.702077 | 1.087684 | 2.724958 | 110.9056 | 2.55E-17 | 2.19E-16 |



|              |          |          |          |          |          |          |          |          |          |          |          |
|--------------|----------|----------|----------|----------|----------|----------|----------|----------|----------|----------|----------|
| LOC114287287 | 3.083837 | 3.472393 | 3.581959 | 0        | 0.126111 | 0        | 5.765388 | -0.51407 | 88.81755 | 4.92E-15 | 3.53E-14 |
| LOC114288221 | 0.277984 | 0.344311 | 0.366519 | 1.364379 | 1.193629 | 1.146184 | -1.99232 | -0.17372 | 48.59157 | 5.28E-10 | 2.42E-09 |
| LOC114288293 | 0.146754 | 0.275408 | 0.304573 | 0.563187 | 0.676821 | 0.69474  | -1.54071 | -0.19936 | 29.32554 | 5.13E-07 | 1.73E-06 |
| LOC114288851 | 0.461227 | 1.038681 | 0.506769 | 1.770015 | 1.7604   | 1.619992 | -1.46958 | -0.41369 | 22.48114 | 8E-06    | 2.34E-05 |
| LOC114289114 | 3.947263 | 3.551106 | 4.135821 | 7.95214  | 6.84369  | 7.298741 | -1.02278 | 3.077442 | 139.4372 | 6.39E-20 | 6.81E-19 |
| LOC114290152 | 1.590022 | 1.602662 | 1.451157 | 0.512809 | 0.385415 | 0.405343 | 1.742997 | 1.275201 | 94.99407 | 1.06E-15 | 8E-15    |
| LOC114290161 | 1.517859 | 1.259341 | 1.492184 | 9.323178 | 8.312664 | 8.871604 | -2.7335  | 4.30866  | 1681.531 | 1.26E-59 | 2.84E-57 |
| LOC114291089 | 0.45782  | 0.436747 | 0.537959 | 0.011559 | 0.036404 | 0.034957 | 3.893818 | 0.395496 | 141.173  | 4.55E-20 | 4.9E-19  |
| LOC114292128 | 2.252971 | 2.219735 | 3.71315  | 0        | 0        | 0        | 8.487796 | -0.00598 | 137.0331 | 5.14E-18 | 4.68E-17 |
| LOC114291783 | 0.115898 | 0.087001 | 0        | 2.59841  | 2.598847 | 3.451288 | -5.38016 | 0.232664 | 208.985  | 4.33E-25 | 7.08E-24 |
| LOC114292191 | 0.615667 | 0.481417 | 0.488554 | 0.963732 | 0.954633 | 1.198745 | -1.07885 | 0.525309 | 26.35244 | 1.65E-06 | 5.28E-06 |
| LOC114292332 | 0.60582  | 0.586651 | 0.718891 | 1.563807 | 1.40471  | 1.748542 | -1.40957 | 1.48926  | 85.20873 | 1.24E-14 | 8.56E-14 |
| LOC114291883 | 0.291426 | 0.328145 | 0.320202 | 1.165474 | 1.209637 | 1.481985 | -2.14163 | -0.2005  | 54.0504  | 9.04E-11 | 4.46E-10 |
| LOC114292342 | 0.894815 | 0.762477 | 1.009742 | 0.263775 | 0.484605 | 0.398865 | 1.072816 | -0.17193 | 13.71166 | 0.000369 | 0.000853 |
| LOC114293961 | 32.73569 | 33.05122 | 31.79371 | 0.28382  | 0.446941 | 0.46494  | 6.198089 | 4.219651 | 3224.666 | 9.32E-72 | 4.78E-69 |
| LOC114294023 | 0.361213 | 0.469298 | 0.335821 | 1.186968 | 0.994233 | 1.107467 | -1.59315 | 0.727105 | 62.59428 | 6.55E-12 | 3.57E-11 |
| LOC114295429 | 1.6092   | 1.510799 | 1.699526 | 0.251198 | 0.312627 | 0.251188 | 2.449379 | 2.669793 | 414.9203 | 2.76E-35 | 9.7E-34  |
| LOC114295951 | 0.601551 | 0.409557 | 0.67632  | 1.118942 | 1.041202 | 1.019043 | -1.00567 | 0.84993  | 28.29867 | 7.66E-07 | 2.54E-06 |
| LOC114296208 | 10.8963  | 10.72693 | 10.39988 | 20.06767 | 21.15526 | 22.95552 | -1.11075 | 4.582262 | 397.386  | 1.34E-34 | 4.48E-33 |
| LOC114296250 | 0.428728 | 0.241374 | 0.336473 | 0.779352 | 0.525973 | 0.841778 | -1.17269 | 0.119477 | 21.97663 | 9.88E-06 | 2.86E-05 |
| LOC114297499 | 0.359803 | 0.247584 | 0.285516 | 1.344451 | 1.702304 | 1.662113 | -2.50067 | 1.525058 | 228.0805 | 2.69E-26 | 4.82E-25 |
| LOC114297535 | 0.025153 | 0.028322 | 0.193458 | 1.73751  | 2.484104 | 2.005089 | -4.73316 | 0.401737 | 203.4213 | 1.68E-23 | 2.43E-22 |
| LOC114297144 | 0.223211 | 0.219918 | 0.398533 | 0.862235 | 0.898538 | 1.207951 | -1.93801 | 0.504212 | 72.04784 | 4.27E-13 | 2.58E-12 |
| LOC114298384 | 2.696771 | 2.888031 | 3.124091 | 0.932493 | 1.006922 | 1.289197 | 1.306258 | 2.056449 | 95.10248 | 1.03E-15 | 7.8E-15  |
| LOC114298395 | 0.486416 | 0.575089 | 0.561168 | 1.812647 | 1.392407 | 1.571046 | -1.64759 | 0.445782 | 54.7465  | 7.26E-11 | 3.6E-10  |
| LOC114298801 | 0.009399 | 0.021167 | 0.010327 | 0.478404 | 0.390132 | 0.497347 | -5.1078  | 0.606806 | 273.5056 | 6.76E-29 | 1.48E-27 |

|              |          |          |          |          |          |          |          |          |          |          |          |
|--------------|----------|----------|----------|----------|----------|----------|----------|----------|----------|----------|----------|
| LOC114299049 | 3.95989  | 3.955412 | 4.182475 | 1.439675 | 1.407798 | 1.334284 | 1.428953 | 2.685337 | 179.3187 | 4.73E-23 | 6.57E-22 |
| LOC114299948 | 0.107061 | 0.166916 | 0.135729 | 0.703617 | 0.766176 | 0.531983 | -2.38668 | 0.589996 | 108.6911 | 4.2E-17  | 3.54E-16 |
| LOC114300211 | 0.487334 | 0.320097 | 0.245417 | 1.439565 | 1.598477 | 1.646572 | -2.23948 | 0.547779 | 97.28835 | 6.06E-16 | 4.66E-15 |
| LOC114300270 | 2.272361 | 2.135936 | 2.909243 | 4.238506 | 4.694786 | 4.997013 | -1.04273 | 2.457552 | 84.86368 | 1.35E-14 | 9.32E-14 |
| LOC114300135 | 0.474394 | 0.534166 | 0.396139 | 1.379781 | 0.977754 | 1.069291 | -1.36624 | 0.402701 | 36.94082 | 2.96E-08 | 1.15E-07 |
| LOC114300288 | 2.864028 | 2.839005 | 2.420636 | 1.112455 | 0.945983 | 0.942025 | 1.341994 | 1.245527 | 59.20401 | 1.82E-11 | 9.55E-11 |
| LOC114302513 | 0.573347 | 0.507247 | 0.566964 | 0.17867  | 0.175849 | 0.157602 | 1.581563 | 0.509308 | 46.81934 | 9.51E-10 | 4.25E-09 |
| LOC114303464 | 0.868447 | 1.051671 | 1.170245 | 2.323344 | 2.13421  | 2.09442  | -1.18798 | 1.592791 | 65.65161 | 2.66E-12 | 1.5E-11  |
| LOC114302646 | 3.910231 | 3.6991   | 3.849132 | 0.924846 | 1.040275 | 1.038883 | 1.816201 | 2.335864 | 209.727  | 3.87E-25 | 6.36E-24 |
| LOC114303751 | 0.178516 | 0.47237  | 0.166721 | 0.454314 | 0.664322 | 0.601113 | -1.21615 | 0.572844 | 12.7573  | 0.004175 | 0.008102 |
| LOC114303035 | 1.470951 | 1.277708 | 1.477665 | 0.101864 | 0.060153 | 0.057762 | 4.168696 | 0.773057 | 202.9987 | 1.07E-24 | 1.69E-23 |
| LOC114303077 | 0.462438 | 0.548851 | 0.604228 | 0        | 0        | 0        | 8.056461 | -0.3842  | 109.0722 | 4.99E-17 | 4.18E-16 |
| LOC114303771 | 1.119714 | 1.33496  | 1.555938 | 0.179598 | 0.235682 | 0.271577 | 2.382374 | -0.28203 | 46.82682 | 9.48E-10 | 4.24E-09 |
| LOC114303925 | 2.173244 | 2.118357 | 2.06708  | 0.058964 | 0.23213  | 0.178323 | 3.54814  | 0.2334   | 114.4062 | 1.17E-17 | 1.03E-16 |
| LOC114304133 | 0.639842 | 0.548922 | 0.669543 | 1.163118 | 1.351895 | 1.130655 | -1.07259 | -0.05319 | 17.16275 | 7.79E-05 | 0.000199 |
| LOC114305433 | 3.885827 | 3.896612 | 3.882847 | 0.746357 | 0.545681 | 0.866601 | 2.324908 | 2.258817 | 283.7688 | 1.94E-29 | 4.43E-28 |
| LOC114305458 | 5.953052 | 6.09846  | 6.625156 | 1.589769 | 1.668974 | 1.771333 | 1.778481 | 2.955874 | 319.643  | 3.2E-31  | 8.32E-30 |
| LOC114305470 | 6.2754   | 5.470519 | 6.402541 | 0        | 0        | 0        | 11.33792 | 2.654104 | 1087.815 | 5.45E-51 | 6.31E-49 |
| LOC114305489 | 1.008438 | 0.692847 | 0.901434 | 0.279635 | 0.513741 | 0.352372 | 1.054875 | 0.261306 | 18.0729  | 5.23E-05 | 0.000137 |
| LOC114305552 | 1.775928 | 1.032099 | 2.14012  | 2.186926 | 2.623867 | 4.330514 | -1.01467 | 0.37867  | 18.09277 | 7.01E-05 | 0.000181 |
| LOC114305582 | 1.689469 | 2.338941 | 1.886722 | 0.755202 | 0.594621 | 1.294233 | 1.022738 | 0.717766 | 22.55362 | 8.89E-06 | 2.59E-05 |
| LOC114305695 | 51.23574 | 51.44102 | 48.45326 | 325.5405 | 344.2818 | 330.3549 | -2.83176 | 7.075255 | 6701.967 | 9.79E-82 | 1.48E-78 |
| LOC114305700 | 0.316844 | 0.356765 | 0.348129 | 0.939732 | 0.883123 | 1.168892 | -1.65981 | 0.329332 | 51.17951 | 2.27E-10 | 1.08E-09 |
| LOC114306010 | 0.679703 | 0.854634 | 0.85884  | 0        | 0.064857 | 0.046709 | 4.145828 | 0.298056 | 131.7736 | 2.95E-19 | 2.99E-18 |
| LOC114306054 | 2.193521 | 2.377278 | 2.018469 | 0.448586 | 0.51018  | 0.716009 | 1.836535 | 0.693937 | 67.30485 | 1.64E-12 | 9.44E-12 |
| LOC114306106 | 1.713275 | 1.66436  | 1.402608 | 5.526584 | 5.745833 | 5.471273 | -1.91057 | 2.713867 | 329.4404 | 1.11E-31 | 2.97E-30 |

|              |          |          |          |          |          |          |          |          |          |          |          |
|--------------|----------|----------|----------|----------|----------|----------|----------|----------|----------|----------|----------|
| LOC114306203 | 24.97721 | 22.69118 | 24.68876 | 63.67754 | 60.53069 | 68.03968 | -1.51472 | 5.836091 | 1544.969 | 4.28E-57 | 8.14E-55 |
| LOC114306256 | 4.039438 | 4.538246 | 4.765228 | 1.573495 | 1.458309 | 1.375558 | 1.496816 | 3.301322 | 307.934  | 1.17E-30 | 2.93E-29 |
| LOC114306377 | 1.553273 | 1.632383 | 1.319806 | 0.075295 | 0.029642 | 0.056928 | 4.655675 | 0.32395  | 154.7088 | 3.52E-21 | 4.16E-20 |
| LOC114306429 | 0.108005 | 0.097291 | 0.094936 | 0.981672 | 0.865688 | 0.742213 | -3.15051 | -0.51197 | 75.26014 | 1.75E-13 | 1.1E-12  |
| LOC114306423 | 1.888001 | 2.377634 | 1.99254  | 0.31611  | 0.373341 | 0.358502 | 2.452456 | 1.605386 | 197.1534 | 2.65E-24 | 4.06E-23 |
| LOC114306430 | 2.008899 | 1.898013 | 1.54762  | 6.590066 | 6.081138 | 6.950181 | -1.94689 | 2.47447  | 278.0151 | 3.89E-29 | 8.65E-28 |
| LOC114306446 | 0.599009 | 0.73069  | 0.804413 | 0.151235 | 0.166708 | 0.228688 | 1.81591  | -0.13443 | 34.99297 | 6.02E-08 | 2.26E-07 |
| LOC114306630 | 0        | 0        | 0        | 6.068622 | 3.772286 | 4.105323 | -8.43138 | -0.31169 | 166.0522 | 6.93E-22 | 8.68E-21 |
| LOC114306629 | 3.992953 | 4.016477 | 3.938753 | 9.710228 | 11.07456 | 11.3173  | -1.53826 | 3.665364 | 470.1807 | 2.65E-37 | 1.09E-35 |
| LOC114306638 | 0.621145 | 0.789075 | 0.979968 | 0.318473 | 0.296346 | 0.328347 | 1.221445 | 0.194202 | 22.50081 | 7.94E-06 | 2.33E-05 |
| LOC114306690 | 0.084219 | 0.075864 | 0.055521 | 0.949187 | 0.916117 | 0.926002 | -3.74167 | -0.11668 | 125.7482 | 1.02E-18 | 9.91E-18 |
| LOC114306694 | 20.39582 | 25.69316 | 23.10172 | 5.195918 | 4.576475 | 4.794072 | 2.144479 | 3.113338 | 449.2087 | 1.76E-34 | 5.85E-33 |
| LOC114306726 | 4.786361 | 4.25939  | 4.014916 | 0.140335 | 0.147326 | 0        | 5.415987 | 1.436544 | 366.105  | 2.18E-32 | 6.16E-31 |
| LOC114306758 | 3.214239 | 2.940621 | 2.86944  | 0        | 0        | 0        | 8.124968 | -0.32824 | 115.9284 | 1.1E-17  | 9.77E-17 |
| LOC114306771 | 0.778851 | 0.393131 | 0.324597 | 1.025244 | 1.268524 | 0.996629 | -1.21434 | -0.07147 | 19.83164 | 2.51E-05 | 6.89E-05 |
| LOC114306734 | 0.386563 | 0.227998 | 0.364057 | 0.635778 | 0.816753 | 0.809587 | -1.31272 | -0.08821 | 24.12127 | 4.07E-06 | 1.24E-05 |
| LOC114306796 | 2.559046 | 1.877819 | 2.685361 | 1.30671  | 1.02886  | 0.869409 | 1.073524 | 0.918418 | 30.04997 | 3.88E-07 | 1.33E-06 |
| LOC114306805 | 0.775138 | 0.763703 | 0.505683 | 1.276963 | 1.35214  | 1.598024 | -1.15584 | 0.441343 | 27.82849 | 9.22E-07 | 3.02E-06 |
| LOC114306832 | 1.042974 | 1.206126 | 0.960128 | 0.051242 | 0        | 0.038742 | 4.927054 | -0.51124 | 81.53654 | 3.23E-14 | 2.16E-13 |
| LOC114306881 | 2.457369 | 2.66323  | 2.632514 | 0.670059 | 0.835338 | 1.013222 | 1.48494  | 0.830387 | 52.7647  | 1.36E-10 | 6.61E-10 |
| LOC114306884 | 3.811055 | 3.996743 | 3.94105  | 1.731954 | 1.203249 | 1.720295 | 1.236807 | 2.160587 | 91.89874 | 2.27E-15 | 1.68E-14 |
| LOC114306890 | 0.642138 | 0.67014  | 0.722752 | 0        | 0.022417 | 0        | 5.941787 | -0.36365 | 102.0924 | 1.93E-16 | 1.55E-15 |
| LOC114306901 | 5.202904 | 4.784408 | 5.049706 | 11.66481 | 12.3494  | 14.59969 | -1.47185 | 2.661592 | 196.1969 | 3.08E-24 | 4.69E-23 |
| LOC114307000 | 0.105546 | 0.138652 | 0.09664  | 1.151187 | 0.604271 | 0.822023 | -2.96465 | -0.22727 | 81.45521 | 3.3E-14  | 2.2E-13  |
| LOC114307056 | 0.241551 | 0        | 0.132701 | 2.963902 | 1.642217 | 2.489907 | -4.17389 | -0.63462 | 87.07144 | 9.38E-15 | 6.54E-14 |
| LOC114307071 | 1.073983 | 0.55814  | 0.544629 | 1.95231  | 1.980601 | 1.248993 | -1.31511 | 0.878961 | 36.7194  | 3.85E-07 | 1.32E-06 |

|              |          |          |          |          |          |          |          |          |          |          |          |
|--------------|----------|----------|----------|----------|----------|----------|----------|----------|----------|----------|----------|
| LOC114307231 | 0.642227 | 0.53974  | 0.853929 | 0.143817 | 0.153202 | 0.115132 | 2.200086 | 1.449182 | 139.1119 | 4.87E-19 | 4.84E-18 |
| LOC114307232 | 0.344126 | 0.311673 | 0.517841 | 0.013599 | 0.053537 | 0.082255 | 2.750997 | 0.001621 | 65.1805  | 5.62E-12 | 3.08E-11 |
| LOC114307202 | 5.101339 | 3.339591 | 4.627428 | 9.488981 | 8.405218 | 9.783179 | -1.17685 | 1.814502 | 72.128   | 4.17E-13 | 2.53E-12 |
| LOC114307241 | 7.155385 | 6.413885 | 6.625648 | 0        | 0        | 0        | 11.21064 | 2.530977 | 998.1643 | 1.74E-49 | 1.73E-47 |
| LOC114307260 | 4.46422  | 4.569729 | 7.023104 | 14.20152 | 9.874838 | 14.22349 | -1.35414 | 1.456254 | 69.16884 | 2.54E-12 | 1.44E-11 |
| LOC114307296 | 0.021296 | 0.023979 | 0        | 0.851661 | 0.548648 | 1.024411 | -5.54718 | -0.71517 | 105.4424 | 8.84E-17 | 7.27E-16 |
| LOC114307340 | 0.832017 | 0.733186 | 0.967167 | 2.148129 | 2.019283 | 2.055029 | -1.39721 | 1.893538 | 108.8474 | 4.05E-17 | 3.42E-16 |
| LOC114307374 | 1.239973 | 1.167518 | 1.550329 | 0.077726 | 0.030599 | 0.014692 | 4.956785 | 1.01969  | 261.199  | 3.17E-28 | 6.54E-27 |
| LOC114307418 | 1.359784 | 1.228672 | 1.291156 | 0        | 0.024028 | 0.023073 | 5.950081 | 0.376058 | 186.5338 | 1.44E-23 | 2.1E-22  |
| LOC114307424 | 0.08181  | 0.110542 | 0.107866 | 0.337091 | 0.405928 | 0.352313 | -1.97937 | 0.410235 | 73.48814 | 2.86E-13 | 1.76E-12 |
| LOC114307477 | 0.440387 | 0.285128 | 0.362904 | 0.860586 | 1.087306 | 0.89277  | -1.48213 | 0.885528 | 60.36656 | 1.28E-11 | 6.8E-11  |
| LOC114307491 | 3.440696 | 3.380686 | 3.106219 | 1.234979 | 0.721444 | 1.355415 | 1.484285 | 1.638944 | 87.88476 | 6.87E-15 | 4.86E-14 |
| LOC114307552 | 1.756899 | 1.528659 | 1.462408 | 0        | 0        | 0        | 8.529605 | 0.027513 | 154.5812 | 5.28E-21 | 6.14E-20 |
| LOC114307562 | 0.723976 | 0.851426 | 0.830816 | 0.029246 | 0.023027 | 0.022112 | 4.795803 | -0.16605 | 108.419  | 4.47E-17 | 3.76E-16 |
| LOC114307796 | 0        | 0.014804 | 0        | 0.955974 | 1.486586 | 1.301009 | -7.64395 | 0.552058 | 302.8912 | 2.94E-30 | 7.09E-29 |
| LOC114307931 | 1.140977 | 0.82355  | 1.478651 | 3.190911 | 2.889278 | 2.492969 | -1.40342 | 1.078125 | 60.28986 | 1.31E-11 | 6.95E-11 |
| LOC114308031 | 5.543847 | 5.302649 | 5.305287 | 3.034153 | 1.919724 | 2.253067 | 1.084193 | 2.000203 | 64.21089 | 4.06E-12 | 2.25E-11 |
| LOC114308037 | 1.244451 | 0.950847 | 0.488332 | 1.93902  | 1.717559 | 2.137966 | -1.19535 | 0.018256 | 20.79298 | 1.64E-05 | 4.62E-05 |
| LOC114308138 | 0.739649 | 0.659785 | 0.759911 | 0.279387 | 0.164985 | 0.198034 | 1.671506 | 0.642601 | 55.45337 | 5.81E-11 | 2.91E-10 |
| LOC114308275 | 1.772558 | 1.72195  | 1.909396 | 0.726573 | 0.646698 | 0.764299 | 1.229625 | 1.181455 | 49.21577 | 4.3E-10  | 1.99E-09 |
| LOC114308348 | 1.721914 | 1.477235 | 1.306338 | 0        | 0.02934  | 0        | 6.705338 | 0.305258 | 179.0321 | 4.96E-23 | 6.87E-22 |
| LOC114308316 | 0.057727 | 0        | 0        | 4.092557 | 3.718087 | 3.808318 | -7.1174  | 0.044442 | 215.5959 | 1.62E-25 | 2.75E-24 |
| LOC114308387 | 0.941672 | 0.687775 | 0.894836 | 0        | 0.109282 | 0        | 4.216505 | -0.65987 | 61.67087 | 8.64E-12 | 4.66E-11 |
| LOC114308501 | 0.320228 | 0.408653 | 0.398761 | 0.077616 | 0.091668 | 0.102695 | 1.902912 | -0.39684 | 30.86058 | 2.84E-07 | 9.85E-07 |
| LOC114308567 | 1.028948 | 0.717225 | 0.753699 | 1.425101 | 2.033763 | 1.81824  | -1.18412 | -0.22292 | 18.00355 | 5.39E-05 | 0.000141 |
| LOC114308768 | 0.515254 | 0.560169 | 0.605175 | 1.614897 | 1.144364 | 1.269814 | -1.34605 | 0.729049 | 45.61295 | 1.43E-09 | 6.27E-09 |

|              |          |          |          |          |          |          |          |          |          |          |          |
|--------------|----------|----------|----------|----------|----------|----------|----------|----------|----------|----------|----------|
| LOC114308884 | 42.96343 | 39.01502 | 40.94563 | 159.652  | 166.3578 | 165.3138 | -2.10432 | 6.223453 | 3379.723 | 1.21E-72 | 6.66E-70 |
| LOC114308930 | 0.22555  | 0.126984 | 0.123911 | 0.779019 | 1.000766 | 0.929988 | -2.57991 | -0.4123  | 60.91324 | 1.08E-11 | 5.8E-11  |
| LOC114308960 | 0        | 0.030762 | 0        | 1.539525 | 1.564091 | 1.614565 | -6.90484 | -0.16333 | 183.1652 | 2.5E-23  | 3.57E-22 |
| LOC114309064 | 0.617962 | 0.636855 | 0.966684 | 1.447019 | 1.544098 | 1.871397 | -1.25018 | 1.794299 | 75.53437 | 3.83E-13 | 2.33E-12 |
| LOC114309066 | 2.847834 | 3.179247 | 3.316241 | 0.13274  | 0.174191 | 0.033454 | 4.658291 | 1.075988 | 266.9614 | 1.53E-28 | 3.23E-27 |
| LOC114309133 | 0.270169 | 0.325939 | 0.286244 | 0.596359 | 0.621467 | 0.490673 | -1.05275 | 0.487659 | 24.34049 | 3.73E-06 | 1.14E-05 |
| LOC114309142 | 3.422195 | 3.103168 | 3.344167 | 6.275992 | 6.241902 | 6.056231 | -1.01436 | 3.25814  | 165.8332 | 4.76E-22 | 6.04E-21 |
| LOC114309117 | 1.138007 | 0.880958 | 1.06803  | 2.909101 | 2.986171 | 3.323664 | -1.68222 | 2.409314 | 208.5317 | 4.63E-25 | 7.55E-24 |
| LOC114309275 | 1.569453 | 1.702938 | 2.163367 | 0        | 0        | 0        | 8.615394 | 0.108116 | 161.2611 | 1.6E-21  | 1.95E-20 |
| LOC114309344 | 0        | 0.116599 | 0.113776 | 30.87106 | 30.23533 | 30.45673 | -8.49907 | 2.184802 | 998.4931 | 3.44E-50 | 3.63E-48 |
| LOC114309347 | 1.469926 | 1.363051 | 1.235053 | 5.658487 | 4.70282  | 5.823121 | -2.08568 | 1.26314  | 146.1196 | 1.76E-20 | 1.95E-19 |
| LOC114309459 | 0        | 0        | 0        | 4.880313 | 3.676965 | 3.944329 | -10.2122 | 1.456642 | 603.2363 | 6.4E-41  | 3.42E-39 |
| LOC114309469 | 0.430137 | 0.457426 | 0.511994 | 4.08332  | 3.266373 | 4.138262 | -3.13653 | 2.466035 | 565.7463 | 2.32E-40 | 1.2E-38  |
| LOC114309499 | 3.922908 | 4.065374 | 4.272119 | 0.631075 | 0.447198 | 0.381709 | 2.985218 | 1.062433 | 177.8208 | 6.07E-23 | 8.36E-22 |
| LOC114309536 | 4.269927 | 3.067917 | 4.066008 | 0.369617 | 0.407434 | 0.111783 | 3.593128 | 0.707031 | 158.0269 | 2.28E-21 | 2.73E-20 |
| LOC114309575 | 0.445522 | 0.661275 | 0.489514 | 5.153778 | 5.101375 | 4.453275 | -3.30634 | 2.043336 | 464.2266 | 4.27E-37 | 1.73E-35 |
| LOC114309793 | 0.412964 | 0.406872 | 0.538818 | 2.674352 | 2.234992 | 2.376733 | -2.51756 | 1.775137 | 273.4483 | 6.81E-29 | 1.48E-27 |
| LOC114309805 | 0        | 0        | 0        | 3.353712 | 3.440782 | 3.688204 | -8.7074  | -0.05729 | 211.3302 | 5.16E-25 | 8.37E-24 |
| LOC114309864 | 0.737662 | 0.415303 | 0.6484   | 1.877313 | 2.006038 | 2.382529 | -1.89295 | 0.195263 | 57.66879 | 2.92E-11 | 1.5E-10  |
| LOC114309874 | 1.310152 | 1.34878  | 1.645164 | 3.878641 | 2.732447 | 2.881075 | -1.22379 | 0.923248 | 43.00325 | 3.47E-09 | 1.47E-08 |
| LOC114309988 | 3.938708 | 3.206007 | 4.223343 | 0.603844 | 1.086735 | 0.913097 | 1.981964 | 0.664417 | 73.32576 | 2.99E-13 | 1.83E-12 |
| LOC114310151 | 0.500301 | 0.520004 | 0.676555 | 1.539081 | 1.321986 | 1.904159 | -1.59566 | -0.165   | 32.77471 | 1.38E-07 | 4.95E-07 |
| LOC114310125 | 3.350408 | 3.431659 | 3.592529 | 1.357508 | 1.357737 | 1.553426 | 1.166965 | 1.894408 | 72.69656 | 3.56E-13 | 2.17E-12 |
| LOC114310186 | 0.618916 | 0.784011 | 0.765033 | 2.49627  | 2.131576 | 2.153179 | -1.74336 | 1.245673 | 105.5663 | 8.59E-17 | 7.07E-16 |
| LOC114310320 | 5.010962 | 4.460492 | 4.873336 | 10.21689 | 10.46746 | 9.399913 | -1.16918 | 2.743565 | 138.6856 | 7.41E-20 | 7.87E-19 |
| LOC114310342 | 4.516971 | 4.46752  | 4.717071 | 1.479468 | 1.39786  | 1.090616 | 1.694155 | 2.144724 | 160.6148 | 1.2E-21  | 1.48E-20 |

|              |          |          |          |          |          |          |          |          |          |          |          |
|--------------|----------|----------|----------|----------|----------|----------|----------|----------|----------|----------|----------|
| LOC114310344 | 1.522493 | 1.736587 | 1.260051 | 0        | 0.056601 | 0        | 5.931148 | 0.362017 | 172.2839 | 1.95E-22 | 2.56E-21 |
| LOC114310630 | 0.648032 | 0.912103 | 0.979027 | 2.945016 | 3.36227  | 2.894629 | -1.96108 | -0.3726  | 40.62154 | 7.95E-09 | 3.26E-08 |
| LOC114310673 | 2.813239 | 2.553181 | 2.612735 | 0.401558 | 0.427764 | 0.428621 | 2.553566 | 2.835059 | 511.7695 | 1.08E-38 | 4.95E-37 |
| LOC114310677 | 0.494729 | 0.51655  | 0.494163 | 0.11446  | 0.090122 | 0.111265 | 2.140068 | 0.166438 | 58.28226 | 2.42E-11 | 1.25E-10 |
| LOC114310691 | 0.715982 | 0.64846  | 0.581458 | 1.131762 | 1.537168 | 1.390498 | -1.17489 | 1.000625 | 42.97177 | 3.51E-09 | 1.49E-08 |
| LOC114310705 | 0        | 0.016431 | 0        | 3.501503 | 3.529752 | 3.590008 | -8.97589 | 1.900173 | 830.4675 | 6.13E-47 | 4.96E-45 |
| LOC114310722 | 0.408561 | 0.460039 | 0.604645 | 0.197041 | 0.214814 | 0.240654 | 1.047315 | 0.456729 | 20.86143 | 1.58E-05 | 4.44E-05 |
| LOC114310762 | 22.71739 | 22.56147 | 21.57357 | 8.121171 | 6.777998 | 8.22783  | 1.429248 | 4.324182 | 514.7852 | 8.62E-39 | 3.97E-37 |
| LOC114310854 | 0.958694 | 1.079487 | 0.837897 | 0.15843  | 0.405414 | 0.389299 | 1.421618 | -0.02153 | 24.82592 | 3.06E-06 | 9.43E-06 |
| LOC114310921 | 0.329929 | 0.412777 | 0.302089 | 0.899627 | 0.944448 | 0.680181 | -1.365   | 0.036993 | 28.27753 | 7.73E-07 | 2.56E-06 |
| LOC114310973 | 1.998026 | 1.97429  | 1.792093 | 0.518865 | 0.641986 | 0.784596 | 1.429355 | 0.07022  | 28.01092 | 8.58E-07 | 2.82E-06 |
| LOC114310982 | 2.449353 | 3.048278 | 2.90367  | 0.468683 | 1.107075 | 1.063071 | 1.503912 | 0.865554 | 51.72388 | 2.07E-10 | 9.91E-10 |
| LOC114311074 | 0.682034 | 0.663245 | 0.476877 | 2.479631 | 2.129867 | 2.428684 | -2.03727 | 0.560408 | 85.97796 | 1.02E-14 | 7.06E-14 |
| LOC114311183 | 0.17501  | 0.179146 | 0.157329 | 4.309302 | 3.939523 | 4.482666 | -4.72134 | 2.09225  | 724.6695 | 1.43E-44 | 9.84E-43 |
| LOC114311199 | 0.814419 | 0.966603 | 1.039944 | 0        | 0.031505 | 0.030252 | 5.094242 | -0.36999 | 93.77929 | 1.43E-15 | 1.06E-14 |
| LOC114311198 | 0.010197 | 0        | 0        | 0.574652 | 0.510844 | 0.630692 | -6.8667  | -0.20105 | 177.3468 | 6.58E-23 | 9.02E-22 |
| LOC114311119 | 4.45605  | 3.775547 | 4.944524 | 0        | 0        | 0        | 9.268682 | 0.69669  | 259.8946 | 7.06E-28 | 1.41E-26 |
| LOC114311205 | 0.543816 | 0.400593 | 0.508165 | 1.007038 | 1.06206  | 1.159549 | -1.25704 | 2.236286 | 108.5181 | 4.37E-17 | 3.68E-16 |
| LOC114311280 | 4.715005 | 3.432942 | 5.063717 | 0.193332 | 0.101482 | 0.097448 | 4.97142  | 1.028045 | 264.0152 | 2.21E-28 | 4.63E-27 |
| LOC114311282 | 1.253473 | 1.157354 | 1.762871 | 6.881341 | 6.74576  | 7.51129  | -2.44765 | 2.370748 | 371.3589 | 1.56E-33 | 4.77E-32 |
| LOC114311347 | 6.162418 | 6.278024 | 6.307421 | 0.100019 | 0.026251 | 0.050414 | 6.634928 | 2.381725 | 833.4615 | 5.3E-47  | 4.3E-45  |
| LOC114311404 | 4.738734 | 4.24128  | 4.405623 | 3.313143 | 1.565195 | 1.335983 | 1.06843  | -0.15973 | 13.23761 | 0.000459 | 0.001046 |
| LOC114311421 | 0.194724 | 0.274073 | 0.213951 | 2.035344 | 1.741915 | 1.672676 | -3.05455 | -0.59013 | 68.21547 | 1.27E-12 | 7.32E-12 |
| LOC114311422 | 0.812588 | 0.648106 | 0.70682  | 1.600236 | 1.502274 | 1.20989  | -1.07227 | 0.01942  | 17.91951 | 5.59E-05 | 0.000146 |
| LOC114311461 | 2.243983 | 1.959497 | 2.113335 | 1.040602 | 0.753788 | 0.849709 | 1.169237 | 1.037745 | 40.05677 | 9.7E-09  | 3.95E-08 |
| LOC114311606 | 0.033896 | 0        | 0        | 1.725269 | 2.037629 | 1.77029  | -6.82716 | -0.23947 | 172.008  | 1.63E-22 | 2.15E-21 |

|              |          |          |          |          |          |          |          |          |          |          |          |
|--------------|----------|----------|----------|----------|----------|----------|----------|----------|----------|----------|----------|
| LOC114311645 | 2.950132 | 2.333198 | 2.54684  | 0.127686 | 0.150804 | 0.09654  | 4.233808 | 0.371134 | 150.6375 | 7.48E-21 | 8.58E-20 |
| LOC114311653 | 5.030233 | 4.854883 | 6.421762 | 2.177158 | 2.605616 | 1.9753   | 1.159405 | 1.324104 | 46.60288 | 1.02E-09 | 4.56E-09 |
| LOC114311671 | 2.934511 | 2.317909 | 2.646789 | 0        | 0        | 0        | 8.546359 | 0.041653 | 156.0593 | 4.04E-21 | 4.76E-20 |
| LOC114311720 | 0.636359 | 0.842987 | 0.847259 | 0        | 0        | 0        | 9.318026 | 0.747856 | 263.4123 | 6.45E-28 | 1.3E-26  |
| LOC114311767 | 1.491757 | 1.343772 | 1.602632 | 3.856708 | 2.846852 | 3.736048 | -1.32681 | 1.204975 | 61.8513  | 8.18E-12 | 4.42E-11 |
| LOC114311792 | 0        | 0        | 0        | 2.992387 | 2.814236 | 2.513837 | -8.65052 | -0.10705 | 201.639  | 2.19E-24 | 3.36E-23 |
| LOC114311888 | 1.259818 | 1.05433  | 1.421626 | 3.218553 | 3.411397 | 2.948219 | -1.45907 | 2.000979 | 123.4921 | 1.64E-18 | 1.56E-17 |
| LOC114311892 | 3.986639 | 3.71499  | 3.806318 | 0.999586 | 0.708336 | 1.20921  | 1.869593 | 1.44592  | 118.375  | 4.9E-18  | 4.48E-17 |
| LOC114312017 | 3.829117 | 4.461545 | 4.28038  | 1.513185 | 1.620346 | 1.830518 | 1.218784 | 1.449307 | 57.81537 | 2.79E-11 | 1.44E-10 |
| LOC114312025 | 3.423124 | 3.910699 | 2.772804 | 11.446   | 8.904911 | 9.134753 | -1.6364  | 3.016603 | 254.7338 | 5.02E-21 | 5.85E-20 |
| LOC114312047 | 4.790808 | 4.339005 | 4.386551 | 1.703902 | 2.186304 | 1.669978 | 1.169496 | 1.508633 | 55.65203 | 5.46E-11 | 2.74E-10 |
| LOC114312085 | 1.16017  | 1.358603 | 1.12176  | 3.59933  | 3.276803 | 3.826891 | -1.66211 | 2.245847 | 184.7866 | 1.92E-23 | 2.76E-22 |
| LOC114312086 | 1.705669 | 1.472444 | 1.999029 | 7.544798 | 9.439731 | 9.064516 | -2.44133 | 1.495386 | 218.0258 | 1.14E-25 | 1.95E-24 |
| LOC114312141 | 2.136045 | 1.460289 | 1.969771 | 0.069338 | 0        | 0        | 6.117681 | -0.21449 | 113.5762 | 1.4E-17  | 1.23E-16 |
| LOC114312147 | 2.693496 | 2.198831 | 2.737497 | 0.673241 | 1.011984 | 0.416468 | 1.753838 | 0.635193 | 56.8924  | 3.71E-11 | 1.89E-10 |
| LOC114312172 | 2.184905 | 1.588878 | 2.350633 | 0.744707 | 0.651508 | 0.813295 | 1.360582 | 0.023616 | 24.35883 | 3.7E-06  | 1.13E-05 |
| LOC114312163 | 1.783047 | 1.932418 | 1.836664 | 0        | 0        | 0        | 9.004521 | 0.458104 | 219.3571 | 1.61E-25 | 2.74E-24 |
| LOC114312271 | 1.4474   | 1.614248 | 1.726632 | 0.050116 | 0.05919  | 0.018946 | 5.07632  | 0.929918 | 259.0303 | 4.18E-28 | 8.55E-27 |
| LOC114312238 | 1.670184 | 1.596159 | 1.865943 | 0.637835 | 0.602652 | 0.829467 | 1.190377 | 1.413012 | 53.60925 | 1.04E-10 | 5.1E-10  |
| LOC114312275 | 0.282501 | 0.222667 | 0.217277 | 0.633363 | 0.714337 | 0.660059 | -1.57131 | 0.590962 | 56.26378 | 4.51E-11 | 2.28E-10 |
| LOC114312319 | 0.089683 | 0        | 0.049269 | 3.994178 | 3.850876 | 3.697809 | -6.22434 | 0.406247 | 264.8431 | 1.99E-28 | 4.2E-27  |
| LOC114312406 | 0.63127  | 0.493214 | 0.679448 | 1.475404 | 1.659548 | 1.469638 | -1.45394 | 1.354802 | 82.06446 | 2.81E-14 | 1.89E-13 |
| LOC114312514 | 0.864324 | 1.039584 | 1.122336 | 0.571341 | 0.506086 | 0.242985 | 1.119524 | 0.262064 | 19.62411 | 2.67E-05 | 7.3E-05  |
| LOC114312536 | 2.572371 | 2.482701 | 2.826371 | 0.111336 | 0.525973 | 0.168356 | 3.088482 | -0.27756 | 64.2795  | 3.98E-12 | 2.21E-11 |
| LOC114312543 | 0        | 0.149472 | 0.218781 | 2.533752 | 2.754988 | 1.733246 | -4.2765  | -0.76845 | 81.33119 | 3.41E-14 | 2.28E-13 |
| LOC114312548 | 4.793327 | 5.712906 | 5.020236 | 0.101911 | 0        | 0        | 7.203942 | 1.534191 | 443.2607 | 7.36E-36 | 2.73E-34 |

|              |          |          |          |          |          |          |          |          |          |          |          |
|--------------|----------|----------|----------|----------|----------|----------|----------|----------|----------|----------|----------|
| LOC114312588 | 2.694865 | 3.034412 | 3.566611 | 0        | 0        | 0        | 8.288235 | -0.18194 | 128.6962 | 7.59E-19 | 7.41E-18 |
| LOC114312600 | 0        | 0.200178 | 0        | 5.170719 | 4.707383 | 5.741966 | -6.17393 | -0.13    | 173.9747 | 1.16E-22 | 1.56E-21 |
| LOC114312666 | 2.534592 | 2.219735 | 2.784863 | 5.221761 | 4.192056 | 5.186609 | -1.04951 | 1.020775 | 35.38544 | 5.21E-08 | 1.97E-07 |
| LOC114312784 | 0.952939 | 0.870006 | 1.018736 | 1.966365 | 1.769428 | 1.982278 | -1.10788 | 0.785324 | 33.8965  | 9.04E-08 | 3.32E-07 |
| LOC114312771 | 3.837459 | 3.825121 | 4.009013 | 0.991099 | 0.750345 | 1.037548 | 1.965544 | 1.82237  | 168.2259 | 3.13E-22 | 4.04E-21 |
| LOC114312779 | 1.181705 | 1.520683 | 2.086697 | 0        | 0.060406 | 0        | 5.739173 | -0.53429 | 83.02555 | 2.18E-14 | 1.48E-13 |
| LOC114312800 | 1.608822 | 1.351459 | 1.430979 | 7.938066 | 7.529441 | 7.475841 | -2.48038 | 2.454839 | 419.3802 | 1.86E-35 | 6.63E-34 |
| LOC114312827 | 1.816872 | 1.621666 | 1.485032 | 0        | 0.063426 | 0        | 5.895239 | 0.326719 | 171.2281 | 1.86E-22 | 2.45E-21 |
| LOC114312918 | 0.987983 | 0.927056 | 1.387077 | 2.893519 | 2.35682  | 2.489454 | -1.31804 | 0.080515 | 27.59999 | 1.01E-06 | 3.29E-06 |
| LOC114312990 | 2.85355  | 2.441949 | 5.392741 | 1.452428 | 1.633705 | 1.490329 | 1.103984 | 0.520345 | 17.13111 | 0.000228 | 0.000545 |
| LOC114313021 | 0.611181 | 0.708579 | 0.537224 | 0.049379 | 0.116637 | 0.031111 | 3.100232 | 1.253045 | 179.2796 | 9.52E-20 | 1E-18    |
| LOC114313221 | 1.537796 | 1.48419  | 1.488493 | 0.532465 | 0.995706 | 0.503226 | 1.022934 | -0.01208 | 13.99665 | 0.000324 | 0.000754 |
| LOC114313307 | 0.70152  | 1.131008 | 1.033559 | 0        | 0.02282  | 0        | 6.399259 | 0.041443 | 136.6086 | 1.45E-19 | 1.51E-18 |
| LOC114313385 | 0.190293 | 0.126041 | 0.24598  | 0.651142 | 0.736988 | 0.43077  | -1.77372 | 0.14975  | 46.81685 | 1.02E-09 | 4.57E-09 |
| LOC114313488 | 0.009275 | 0.015665 | 0.015286 | 0.126448 | 0.165935 | 0.165713 | -3.57715 | -0.78925 | 71.1779  | 5.45E-13 | 3.27E-12 |
| LOC114313533 | 0.995664 | 1.220038 | 1.029626 | 0.372635 | 0.419143 | 0.281738 | 1.483044 | -0.25692 | 22.84251 | 6.89E-06 | 2.03E-05 |
| LOC114313598 | 1.119015 | 0.990007 | 1.229509 | 5.957213 | 5.605731 | 7.030741 | -2.57382 | 0.500425 | 120.3666 | 3.19E-18 | 2.97E-17 |
| LOC114313675 | 3.806335 | 4.524032 | 4.298351 | 1.72981  | 1.664659 | 1.162539 | 1.370215 | -0.13543 | 21.94719 | 1E-05    | 2.89E-05 |
| LOC114313783 | 2.990346 | 2.331085 | 2.864385 | 0        | 0        | 0        | 7.792478 | -0.61647 | 90.38131 | 4.07E-15 | 2.94E-14 |
| LOC114313882 | 2.505404 | 2.473275 | 1.810055 | 0        | 0        | 0.04717  | 6.551624 | 0.16902  | 157.6518 | 2.05E-21 | 2.48E-20 |
| LOC114313914 | 0.633876 | 0.878453 | 0.535743 | 3.634093 | 2.861363 | 2.613597 | -2.23068 | 0.238461 | 76.7786  | 1.16E-13 | 7.36E-13 |
| LOC114313944 | 2.131495 | 1.811809 | 1.767952 | 5.166236 | 5.144471 | 5.801611 | -1.59932 | 2.41758  | 192.7322 | 5.32E-24 | 7.97E-23 |
| LOC114313917 | 0.603768 | 0.309019 | 0.542769 | 2.793742 | 4.006594 | 4.601718 | -3.06592 | 0.28381  | 125.8231 | 1.01E-18 | 9.77E-18 |
| LOC114313971 | 0.25456  | 0.250804 | 0.314657 | 1.272546 | 1.411852 | 0.874667 | -2.19283 | -0.45346 | 44.98676 | 1.76E-09 | 7.69E-09 |
| LOC114313928 | 0.178305 | 0.150578 | 0.146933 | 0.891347 | 0.86132  | 0.704553 | -2.43066 | -0.51817 | 51.75725 | 1.88E-10 | 9.01E-10 |
| LOC114314258 | 5.001117 | 4.631898 | 4.829352 | 0.025609 | 0.020164 | 0.019362 | 7.576181 | 2.380868 | 882.8589 | 5.18E-48 | 4.54E-46 |



|              |          |          |          |          |          |          |          |          |          |          |          |
|--------------|----------|----------|----------|----------|----------|----------|----------|----------|----------|----------|----------|
| LOC114314538 | 0.463117 | 0.428763 | 0.384462 | 0.149665 | 0.132571 | 0.198025 | 1.288176 | -0.06756 | 20.9007  | 1.55E-05 | 4.38E-05 |
| LOC114314571 | 4.606393 | 5.094167 | 5.302248 | 0        | 0        | 0        | 10.13749 | 1.508666 | 485.3904 | 2.25E-37 | 9.37E-36 |
| LOC114314582 | 0.692539 | 0.435236 | 0.513179 | 1.171081 | 0.991225 | 1.305993 | -1.16977 | 0.720613 | 34.42299 | 7.44E-08 | 2.76E-07 |
| LOC114314590 | 4.089974 | 3.047626 | 3.502541 | 1.968047 | 1.291312 | 1.487981 | 1.08741  | 0.459367 | 22.59927 | 7.62E-06 | 2.24E-05 |
| LOC114314615 | 0.829362 | 0.718354 | 0.981351 | 1.584947 | 1.826245 | 1.724426 | -1.13098 | 0.901962 | 37.73144 | 2.22E-08 | 8.72E-08 |
| LOC114314667 | 0.717828 | 0.550313 | 1.057203 | 1.832388 | 1.836241 | 1.721271 | -1.31404 | 1.375374 | 64.01555 | 6.13E-12 | 3.35E-11 |
| LOC114314740 | 6.219552 | 6.026011 | 5.615273 | 0        | 0        | 0        | 10.578   | 1.924129 | 655.3359 | 2.68E-42 | 1.59E-40 |
| LOC114314945 | 0.430117 | 0.427333 | 0.36139  | 0.091985 | 0.090533 | 0.034774 | 2.392778 | -0.57129 | 37.11649 | 2.77E-08 | 1.08E-07 |
| LOC114315005 | 3.711641 | 4.179299 | 4.147255 | 0        | 0        | 0        | 8.623366 | 0.115051 | 166.1038 | 6.86E-22 | 8.62E-21 |
| LOC114314985 | 1.739586 | 1.849949 | 1.507847 | 0.070272 | 0        | 0.026565 | 5.616192 | 0.555784 | 200.6827 | 1.53E-24 | 2.39E-23 |
| LOC114315015 | 0.25704  | 0.161541 | 0.243013 | 0.554184 | 0.487681 | 0.476512 | -1.28173 | 0.912159 | 46.97574 | 9.02E-10 | 4.05E-09 |
| LOC114314998 | 14.63259 | 15.35371 | 13.99267 | 6.956776 | 6.306066 | 5.657608 | 1.121667 | 3.295482 | 184.7644 | 1.92E-23 | 2.77E-22 |
| LOC114315055 | 1.461875 | 1.221276 | 1.424875 | 0.642926 | 0.236235 | 0.388878 | 1.642061 | 0.310845 | 40.33494 | 8.79E-09 | 3.59E-08 |
| LOC114315056 | 0.04768  | 0.107374 | 0.157163 | 1.646786 | 1.637841 | 1.965924 | -4.11214 | -0.69331 | 88.50221 | 5.33E-15 | 3.81E-14 |
| LOC114315033 | 1.384444 | 1.558881 | 1.795227 | 4.851963 | 4.909229 | 4.765521 | -1.72494 | 2.981802 | 334.8107 | 6.28E-32 | 1.72E-30 |
| LOC114315062 | 4.602205 | 4.13332  | 4.334259 | 0        | 0        | 0        | 8.946113 | 0.402516 | 210.4367 | 5.88E-25 | 9.48E-24 |
| LOC114315077 | 2.05097  | 1.835667 | 2.282378 | 0        | 0.07527  | 0        | 5.970109 | 0.394892 | 181.6297 | 3.22E-23 | 4.55E-22 |
| LOC114315121 | 0.312033 | 0.225867 | 0.269377 | 0.891347 | 0.893221 | 0.704553 | -1.69837 | -0.34365 | 32.23657 | 1.68E-07 | 6.01E-07 |
| LOC114315303 | 1.402223 | 1.288898 | 1.069044 | 3.173234 | 2.539457 | 3.461121 | -1.3832  | 1.216954 | 66.83343 | 1.88E-12 | 1.08E-11 |
| LOC114315352 | 4.515962 | 4.389896 | 4.087301 | 0.413414 | 0.604515 | 0.647465 | 2.824971 | 2.19839  | 359.1846 | 5.17E-33 | 1.53E-31 |
| LOC114315411 | 0.029114 | 0.032783 | 0        | 5.980517 | 6.125683 | 4.641733 | -7.87265 | 1.558119 | 614.3354 | 9.51E-42 | 5.45E-40 |
| LOC114315663 | 6.104211 | 6.246001 | 6.680337 | 0        | 0.069341 | 0        | 7.710144 | 2.009216 | 647.761  | 1.2E-42  | 7.36E-41 |
| LOC114315732 | 0.977709 | 1.016214 | 0.881436 | 0.091144 | 0.035882 | 0.068911 | 3.734624 | -0.46018 | 69.74294 | 8.18E-13 | 4.83E-12 |
| LOC114315892 | 0.471988 | 0.365377 | 0.648241 | 1.260173 | 1.393327 | 1.114954 | -1.44194 | 0.879472 | 55.93682 | 5E-11    | 2.51E-10 |
| LOC114316012 | 6.166471 | 4.976127 | 5.804224 | 2.092448 | 2.294765 | 2.14705  | 1.267261 | 2.531832 | 123.0277 | 1.81E-18 | 1.72E-17 |
| LOC114316032 | 0.164024 | 0.316612 | 0.154474 | 3.194633 | 2.414733 | 2.705209 | -3.79406 | 0.957517 | 260.8287 | 3.32E-28 | 6.85E-27 |

|              |          |          |          |          |          |          |          |          |          |          |          |
|--------------|----------|----------|----------|----------|----------|----------|----------|----------|----------|----------|----------|
| LOC114315999 | 0.135508 | 0.171654 | 0.18611  | 2.03221  | 2.109215 | 2.234898 | -3.78877 | 1.051817 | 294.6272 | 5.38E-30 | 1.27E-28 |
| LOC114316036 | 0.866671 | 1.426271 | 0.988873 | 2.302586 | 2.003818 | 2.428119 | -1.14933 | 0.643528 | 31.21773 | 2.48E-07 | 8.66E-07 |
| LOC114316092 | 2.071433 | 1.672308 | 1.97537  | 0.213141 | 0.559401 | 0.376016 | 2.152051 | -0.01186 | 49.69185 | 3.68E-10 | 1.72E-09 |
| LOC114316074 | 0.202238 | 0.151813 | 0.296277 | 2.818519 | 2.412182 | 2.686909 | -3.63976 | -0.58249 | 85.33209 | 1.2E-14  | 8.29E-14 |
| LOC114316105 | 1.138545 | 1.025599 | 1.14672  | 0        | 0        | 0.017387 | 7.127057 | 1.455973 | 434.6244 | 4.97E-36 | 1.87E-34 |
| LOC114316130 | 1.375387 | 0.985526 | 2.198103 | 11.36459 | 11.63252 | 13.40417 | -3.09398 | 0.74885  | 180.4564 | 3.91E-23 | 5.49E-22 |
| LOC114316226 | 354.6918 | 349.7861 | 356.4455 | 875.1349 | 844.5811 | 887.534  | -1.4024  | 10.46267 | 6525.168 | 1.01E-28 | 2.17E-27 |
| LOC114316266 | 10.30155 | 11.0261  | 10.7592  | 3.861654 | 4.01934  | 3.859577 | 1.342584 | 3.909621 | 401.2596 | 9.4E-35  | 3.2E-33  |
| LOC114316283 | 2.515584 | 2.049073 | 1.705433 | 0        | 0        | 0.073562 | 5.803233 | -0.48707 | 89.67346 | 3.96E-15 | 2.87E-14 |
| LOC114316431 | 1.785366 | 1.814189 | 1.770275 | 0        | 0        | 0        | 7.994293 | -0.44036 | 105.6433 | 1.08E-16 | 8.84E-16 |
| LOC114316470 | 1.645708 | 1.778515 | 1.849777 | 0.481408 | 0.460268 | 0.363978 | 1.916612 | 1.83535  | 161.1798 | 1.09E-21 | 1.34E-20 |
| LOC114316474 | 1.516353 | 1.70741  | 2.056014 | 0        | 0.138533 | 0.133026 | 3.991889 | -0.02669 | 99.84388 | 3.29E-16 | 2.58E-15 |
| LOC114316559 | 0.790214 | 0.514095 | 0.694593 | 1.436468 | 1.508035 | 1.061935 | -1.08577 | 0.824877 | 31.44488 | 2.27E-07 | 7.98E-07 |
| LOC114316595 | 0.723493 | 0.855384 | 0.794932 | 1.183663 | 1.553294 | 1.740145 | -1.04339 | 0.017849 | 17.00719 | 8.34E-05 | 0.000212 |
| LOC114316576 | 8.590879 | 8.789455 | 8.912097 | 0        | 0        | 0.059936 | 8.153379 | 1.644376 | 527.4396 | 3.42E-39 | 1.63E-37 |
| LOC114316692 | 0.433399 | 0.39593  | 0.368376 | 1.20406  | 0.948036 | 1.045221 | -1.50416 | 1.460827 | 93.86344 | 1.4E-15  | 1.04E-14 |
| LOC114316746 | 9.654419 | 11.52969 | 15.75085 | 2.127274 | 4.18736  | 6.835561 | 1.304387 | -0.05976 | 19.70528 | 2.73E-05 | 7.47E-05 |
| LOC114316843 | 0.583982 | 0.52605  | 0.333656 | 2.420392 | 1.504528 | 2.11893  | -2.1366  | 0.716117 | 96.81416 | 8.56E-16 | 6.5E-15  |
| LOC114316850 | 1.784441 | 1.364792 | 1.84966  | 5.385925 | 4.674404 | 5.043894 | -1.68752 | 1.61195  | 127.8176 | 6.65E-19 | 6.54E-18 |
| LOC114316883 | 1.084742 | 1.041797 | 0.911416 | 0.318978 | 0.342481 | 0.416566 | 1.37091  | 0.480145 | 35.53313 | 4.94E-08 | 1.87E-07 |
| LOC114316875 | 3.567805 | 3.583033 | 4.661736 | 0        | 0.069008 | 0.066265 | 6.029273 | 0.449469 | 192.925  | 5.16E-24 | 7.74E-23 |
| LOC114317152 | 0.804275 | 1.207482 | 0.824777 | 1.851902 | 1.611612 | 1.842325 | -1.00789 | -0.28871 | 12.52641 | 0.00064  | 0.001423 |
| LOC114317212 | 4.424746 | 4.37614  | 4.423986 | 0.176133 | 0.169499 | 0.207151 | 4.455707 | 2.683308 | 853.6037 | 2.02E-47 | 1.7E-45  |
| LOC114317253 | 2.104913 | 2.12064  | 1.947584 | 0        | 0        | 0        | 8.432596 | -0.05662 | 145.0144 | 3.1E-20  | 3.38E-19 |
| LOC114317281 | 0.325694 | 0.33617  | 0.290756 | 0.012334 | 0.106829 | 0.06528  | 2.162376 | -0.07028 | 45.42134 | 1.63E-09 | 7.13E-09 |
| LOC114317263 | 0.718747 | 0.789075 | 0.769975 | 5.650849 | 5.812365 | 6.964317 | -3.1264  | 2.564657 | 615.514  | 8.83E-42 | 5.09E-40 |

|              |          |          |          |          |          |          |          |          |          |          |          |
|--------------|----------|----------|----------|----------|----------|----------|----------|----------|----------|----------|----------|
| LOC114317265 | 0.219153 | 0.21592  | 0.421386 | 1.394331 | 1.45073  | 1.656618 | -2.49778 | 0.028488 | 79.66288 | 5.32E-14 | 3.49E-13 |
| LOC114317292 | 2.68974  | 2.224158 | 3.186214 | 0        | 0        | 0        | 8.637908 | 0.124974 | 163.8655 | 1.01E-21 | 1.25E-20 |
| LOC114317325 | 0.036816 | 0        | 0        | 2.576574 | 3.003542 | 2.732358 | -7.5373  | 1.211447 | 487.249  | 6.92E-38 | 3E-36    |
| LOC114317372 | 0.277302 | 0.242854 | 0.253903 | 0.896152 | 1.08045  | 1.249239 | -2.16859 | 0.432741 | 87.18899 | 7.44E-15 | 5.25E-14 |
| LOC114317354 | 2.101145 | 1.904248 | 2.083384 | 0.838428 | 0.8802   | 0.704345 | 1.224085 | -0.10733 | 18.67406 | 4.02E-05 | 0.000107 |
| LOC114317376 | 0        | 0        | 0.026487 | 9.816092 | 8.832985 | 10.73489 | -9.71898 | 2.64982  | 1353.922 | 1.15E-55 | 1.89E-53 |
| LOC114317436 | 0        | 0        | 0        | 1.201567 | 1.335633 | 1.389422 | -7.82218 | -0.8944  | 110.1534 | 3.92E-17 | 3.31E-16 |
| LOC114317519 | 0        | 0        | 0        | 4.090837 | 3.53523  | 3.168396 | -8.75648 | -0.00134 | 216.4283 | 2.46E-25 | 4.11E-24 |
| LOC114317582 | 1.167803 | 1.009689 | 1.283114 | 0.227449 | 0.11939  | 0.200629 | 2.559419 | 0.102462 | 70.14498 | 7.3E-13  | 4.32E-12 |
| LOC114317778 | 0.544712 | 0.466142 | 0.622438 | 1.623911 | 1.309799 | 1.287682 | -1.45226 | 0.477999 | 44.34438 | 2.19E-09 | 9.48E-09 |
| LOC114317788 | 3.108794 | 3.254847 | 2.816506 | 0.941872 | 1.522229 | 1.236842 | 1.178916 | 1.301277 | 47.79692 | 6.86E-10 | 3.12E-09 |
| LOC114317811 | 1.319715 | 1.155775 | 1.825958 | 3.509657 | 2.518529 | 3.426096 | -1.2323  | 1.527398 | 62.4945  | 1.09E-11 | 5.83E-11 |
| LOC114317840 | 0        | 0        | 0        | 2.733894 | 2.504816 | 1.991851 | -9.18274 | 0.420713 | 290.7264 | 1.71E-29 | 3.92E-28 |
| LOC114318059 | 1.997952 | 1.879877 | 2.526021 | 0.049752 | 0.11752  | 0.075232 | 4.509377 | 0.420781 | 161.2112 | 1.08E-21 | 1.33E-20 |
| LOC114318068 | 0.735711 | 0.644318 | 0.578199 | 0.065012 | 0.058501 | 0.105329 | 2.960188 | 1.173709 | 184.9743 | 1.86E-23 | 2.68E-22 |
| LOC114318100 | 2.189744 | 2.336844 | 2.495738 | 0.950582 | 0.584732 | 0.651328 | 1.604951 | 1.54103  | 96.4912  | 7.35E-16 | 5.61E-15 |
| LOC114318101 | 2.990613 | 3.426501 | 2.709436 | 1.080922 | 1.301654 | 1.201842 | 1.230498 | 1.898139 | 76.63899 | 1.2E-13  | 7.63E-13 |
| LOC114318140 | 0.330318 | 0.371937 | 0.374641 | 1.259026 | 1.250581 | 1.186228 | -1.88103 | 1.200994 | 119.1931 | 4.11E-18 | 3.78E-17 |
| LOC114318141 | 0.148807 | 0.293224 | 0.327002 | 2.637426 | 2.55584  | 2.50538  | -3.41621 | 0.224979 | 142.7079 | 3.38E-20 | 3.68E-19 |
| LOC114318113 | 3.588793 | 3.657778 | 2.583448 | 0.674874 | 1.372715 | 1.318151 | 1.396609 | 1.16456  | 53.63569 | 2.23E-10 | 1.06E-09 |
| LOC114318170 | 0.892278 | 0.74635  | 0.924361 | 0.556115 | 0.182444 | 0.245269 | 1.348208 | -0.34483 | 17.25205 | 7.49E-05 | 0.000192 |
| LOC114318368 | 1.31933  | 1.025038 | 1.188674 | 0.047966 | 0        | 0        | 6.164195 | 0.569737 | 207.2782 | 5.6E-25  | 9.03E-24 |
| LOC114318450 | 1.177724 | 1.097474 | 1.182461 | 2.768395 | 2.150678 | 2.483811 | -1.18977 | 1.45541  | 60.76982 | 1.13E-11 | 6.05E-11 |
| LOC114318447 | 0.637881 | 0.948093 | 0.532658 | 2.319107 | 1.533829 | 2.139156 | -1.59338 | 0.712083 | 57.89844 | 3.1E-11  | 1.59E-10 |
| LOC114318538 | 2.278866 | 2.012185 | 2.215668 | 4.321387 | 4.059552 | 4.12352  | -1.04218 | 2.564671 | 97.53442 | 5.71E-16 | 4.41E-15 |
| LOC114318587 | 1.617136 | 1.77071  | 1.797801 | 0.682836 | 0.63788  | 0.551273 | 1.371788 | 2.48857  | 137.7607 | 8.9E-20  | 9.38E-19 |

|              |          |          |          |          |          |          |          |          |          |          |          |
|--------------|----------|----------|----------|----------|----------|----------|----------|----------|----------|----------|----------|
| LOC114318597 | 1.21506  | 0.796017 | 1.165123 | 0.481912 | 0.252961 | 0.212543 | 1.699384 | 0.048676 | 34.52615 | 7.16E-08 | 2.66E-07 |
| LOC114318662 | 0.015768 | 0        | 0        | 1.877506 | 2.166647 | 1.647083 | -8.20736 | 1.890621 | 743.2594 | 3.87E-42 | 2.28E-40 |
| LOC114318777 | 0        | 0        | 0.025567 | 1.015178 | 1.032451 | 1.119337 | -6.56464 | -0.48749 | 141.2907 | 4.45E-20 | 4.8E-19  |
| LOC114318798 | 0.055734 | 0.083675 | 0.061237 | 5.065718 | 5.584007 | 5.362051 | -6.37533 | 2.1635   | 913.6172 | 1.29E-48 | 1.19E-46 |
| LOC114318890 | 0.599847 | 0.423797 | 0.491077 | 0.106903 | 0.101007 | 0.096992 | 2.202357 | -0.17866 | 45.66683 | 1.4E-09  | 6.17E-09 |
| LOC114319004 | 0.240107 | 0.216288 | 0.211053 | 0.829298 | 0.962259 | 1.023011 | -2.17188 | -0.37094 | 48.84607 | 4.85E-10 | 2.24E-09 |
| LOC114319049 | 0.328878 | 0.138869 | 0.406522 | 2.017718 | 0.823762 | 1.582037 | -2.3714  | -0.55915 | 43.49888 | 3.91E-09 | 1.65E-08 |
| LOC114319085 | 1.385123 | 1.400498 | 1.428715 | 0.256929 | 0.202297 | 0.427364 | 2.104432 | 0.018142 | 49.74518 | 3.61E-10 | 1.69E-09 |
| LOC114319302 | 3.257674 | 2.84763  | 2.91999  | 0.935032 | 0.920266 | 2.003024 | 1.08222  | 0.683944 | 25.06518 | 2.96E-06 | 9.15E-06 |
| LOC114319351 | 0.61134  | 0.513146 | 0.671704 | 0        | 0.015909 | 0.007638 | 5.911139 | 0.818167 | 252.7155 | 9.48E-28 | 1.88E-26 |
| LOC114319593 | 0.618576 | 0.767588 | 0.749008 | 0        | 0        | 0.034701 | 5.493251 | -0.02483 | 125.1903 | 1.15E-18 | 1.11E-17 |
| LOC114319581 | 7.176903 | 6.114401 | 6.149173 | 13.49993 | 11.51375 | 11.61135 | -1.01215 | 4.584266 | 287.0056 | 1.21E-24 | 1.9E-23  |
| LOC114319709 | 1.452216 | 1.794169 | 1.861546 | 3.446497 | 4.128221 | 4.075015 | -1.30902 | 2.0896   | 105.9595 | 7.84E-17 | 6.47E-16 |
| LOC114319762 | 1.233371 | 1.025798 | 1.124163 | 2.573259 | 2.507547 | 3.101344 | -1.37996 | 2.078676 | 117.8091 | 5.54E-18 | 5.04E-17 |
| LOC114319807 | 7.112252 | 5.648015 | 6.786301 | 13.9495  | 13.82297 | 13.27353 | -1.16942 | 3.045204 | 173.7258 | 1.21E-22 | 1.62E-21 |
| LOC114319819 | 2.78702  | 2.822255 | 2.692283 | 1.00306  | 1.151199 | 1.105441 | 1.234627 | 2.644065 | 132.6684 | 2.46E-19 | 2.51E-18 |
| LOC114319801 | 0.216269 | 0.243518 | 0.343234 | 0.567867 | 0.859845 | 0.957774 | -1.70172 | -0.47127 | 28.84266 | 6.2E-07  | 2.07E-06 |
| LOC114319927 | 0.494649 | 0.346227 | 0.499425 | 0.024302 | 0.057404 | 0.036748 | 3.298401 | -0.60249 | 54.01539 | 9.14E-11 | 4.51E-10 |
| LOC114320008 | 7.000709 | 6.054891 | 6.131282 | 19.55015 | 15.24791 | 17.43075 | -1.53381 | 1.847365 | 123.9543 | 1.49E-18 | 1.42E-17 |
| LOC114320105 | 1.028577 | 1.008041 | 1.109212 | 0.034625 | 0.027263 | 0.026179 | 4.942245 | -0.04164 | 123.1177 | 1.78E-18 | 1.69E-17 |
| LOC114320173 | 1.0748   | 1.100202 | 1.030628 | 0.106571 | 0.08391  | 0.053717 | 3.601154 | 0.001963 | 98.0075  | 5.1E-16  | 3.96E-15 |
| LOC114320113 | 3.73521  | 2.315574 | 3.827354 | 6.637361 | 5.586451 | 6.80644  | -1.04008 | 1.817966 | 54.26914 | 1.39E-10 | 6.75E-10 |
| LOC114320119 | 1.211039 | 1.363627 | 1.043622 | 0.345326 | 0.679745 | 0.424272 | 1.18034  | 0.2264   | 21.57656 | 1.17E-05 | 3.35E-05 |
| LOC114320199 | 0.636063 | 0.376008 | 0.366906 | 5.781245 | 4.39264  | 5.267085 | -3.55703 | 2.437566 | 602.7329 | 2.17E-38 | 9.69E-37 |
| LOC114320210 | 2.301701 | 2.168573 | 2.477363 | 0        | 0        | 0        | 9.253765 | 0.684108 | 262.091  | 5.36E-28 | 1.09E-26 |
| LOC114320313 | 2.008899 | 2.410345 | 1.628308 | 0.359195 | 0.612773 | 0.497891 | 1.894752 | 0.325096 | 51.86834 | 1.81E-10 | 8.71E-10 |

|              |          |          |          |          |          |          |          |          |          |          |          |
|--------------|----------|----------|----------|----------|----------|----------|----------|----------|----------|----------|----------|
| LOC114320333 | 4.213731 | 3.867489 | 4.279649 | 0        | 0        | 0        | 9.49322  | 0.904112 | 311.3651 | 1.68E-30 | 4.12E-29 |
| LOC114320367 | 0.916154 | 1.255845 | 0.897201 | 0.072409 | 0        | 0.054746 | 4.454876 | -0.11749 | 100.1144 | 3.08E-16 | 2.42E-15 |
| LOC114320618 | 1.931118 | 2.627442 | 3.315313 | 0.804473 | 0.863748 | 1.105887 | 1.366515 | 0.511065 | 33.48117 | 1.11E-07 | 4.04E-07 |
| LOC114320664 | 1.843479 | 1.63783  | 1.918677 | 0.042419 | 0.038966 | 0.074834 | 4.962625 | 2.83651  | 986.1498 | 5.73E-50 | 5.92E-48 |
| LOC114320762 | 0.444564 | 0.481326 | 0.601183 | 0.145051 | 0.146839 | 0.188003 | 1.542245 | 0.898794 | 57.56258 | 3.02E-11 | 1.55E-10 |
| LOC114320784 | 0.995365 | 0.947325 | 0.963453 | 0.258485 | 0.339204 | 0.423438 | 1.370824 | 0.818225 | 45.41784 | 1.52E-09 | 6.69E-09 |
| LOC114320798 | 1.729359 | 1.880568 | 1.769974 | 4.95235  | 4.136664 | 4.916458 | -1.48253 | 3.062599 | 273.57   | 6.71E-29 | 1.46E-27 |
| LOC114320817 | 24.62375 | 26.38593 | 24.14036 | 4.513254 | 4.867924 | 5.375596 | 2.231628 | 3.716019 | 821.5717 | 9.46E-47 | 7.54E-45 |
| LOC114320818 | 0.915717 | 0.743348 | 0.725354 | 2.361424 | 2.072669 | 2.86835  | -1.71452 | 1.225586 | 99.38813 | 3.66E-16 | 2.87E-15 |
| LOC114320899 | 2.548287 | 1.936821 | 3.149897 | 0.115808 | 0.182367 | 0.087559 | 4.101578 | -0.42232 | 76.15694 | 1.37E-13 | 8.66E-13 |
| LOC114320900 | 0.156132 | 0.158224 | 0.325943 | 0.482494 | 0.648064 | 0.579387 | -1.53647 | -0.30673 | 26.57067 | 1.52E-06 | 4.86E-06 |
| LOC114320919 | 0.324987 | 0.528572 | 0.376914 | 0.853331 | 0.723568 | 0.942952 | -1.14654 | 0.132592 | 21.69325 | 1.11E-05 | 3.19E-05 |
| LOC114321153 | 3.275968 | 2.347375 | 2.826009 | 1.033534 | 1.278781 | 0.967477 | 1.259452 | 1.181052 | 48.92292 | 4.73E-10 | 2.19E-09 |
| LOC114321193 | 0.669242 | 0.505682 | 0.638571 | 0        | 0.012604 | 0        | 6.61133  | 0.220552 | 167.3249 | 3.66E-22 | 4.7E-21  |
| LOC114321195 | 0.451727 | 0.533455 | 0.484226 | 0.060085 | 0        | 0.030286 | 3.946896 | -0.28083 | 80.71677 | 4.01E-14 | 2.66E-13 |
| LOC114321301 | 2.610434 | 3.322735 | 3.367009 | 0.412635 | 0.406119 | 0.233986 | 3.02558  | 0.037989 | 81.58927 | 3.19E-14 | 2.13E-13 |
| LOC114321303 | 2.066769 | 1.303219 | 1.544175 | 0.150281 | 0.059163 | 0.113623 | 3.797906 | -0.41357 | 71.62076 | 4.81E-13 | 2.9E-12  |
| LOC114321338 | 0.015037 | 0.005644 | 0.011014 | 4.218545 | 5.143725 | 4.959935 | -8.80349 | 3.891855 | 3301.94  | 5.52E-64 | 1.76E-61 |
| LOC114321378 | 0.300134 | 0.354848 | 0.527632 | 0.845666 | 0.730286 | 1.010636 | -1.24359 | 0.393325 | 30.10012 | 3.81E-07 | 1.3E-06  |
| LOC114321499 | 9.453643 | 9.129379 | 10.2699  | 3.774144 | 3.829062 | 3.812207 | 1.230942 | 4.609199 | 473.3448 | 2.06E-37 | 8.58E-36 |
| LOC114321534 | 0.96699  | 0.941689 | 0.804033 | 1.710306 | 2.019956 | 2.298863 | -1.26781 | 0.798373 | 43.48448 | 2.94E-09 | 1.26E-08 |
| LOC114321669 | 0.454472 | 0.444987 | 0.390794 | 2.227012 | 1.810038 | 2.33556  | -2.39638 | 0.990701 | 150.9016 | 7.12E-21 | 8.19E-20 |
| LOC114321668 | 0.515326 | 0.491743 | 0.527823 | 2.14346  | 1.787699 | 1.800672 | -1.99293 | 2.088116 | 229.8102 | 2.11E-26 | 3.8E-25  |
| LOC114321813 | 0.520015 | 0.508491 | 0.330788 | 0.174133 | 0.23504  | 0.169273 | 1.115689 | -0.3124  | 12.96408 | 0.000522 | 0.001177 |
| LOC114321836 | 0.340363 | 0.114974 | 0.17452  | 17.30352 | 14.98826 | 16.65351 | -6.33943 | 4.50093  | 1640.687 | 1.56E-12 | 8.96E-12 |
| LOC114321874 | 0.183031 | 0.037471 | 0.109693 | 0.725928 | 0.762095 | 0.663196 | -2.74168 | -0.35013 | 67.09783 | 1.75E-12 | 1E-11    |

|              |          |          |          |          |          |          |          |          |          |          |          |
|--------------|----------|----------|----------|----------|----------|----------|----------|----------|----------|----------|----------|
| LOC114322058 | 6.271803 | 5.627983 | 6.627065 | 0.655231 | 0.963026 | 0.924747 | 2.730173 | 2.157718 | 333.6162 | 7.13E-32 | 1.94E-30 |
| LOC114322059 | 3.831854 | 3.258008 | 4.324781 | 8.718878 | 10.44667 | 11.89441 | -1.56134 | 3.058884 | 260.5925 | 1.33E-23 | 1.95E-22 |
| LOC114322173 | 0.494309 | 0.654813 | 0.660262 | 1.074756 | 1.206913 | 1.372079 | -1.13734 | 1.53547  | 57.23373 | 3.34E-11 | 1.71E-10 |
| LOC114322255 | 2.011902 | 1.994902 | 1.765149 | 0.109172 | 0.343835 | 0.309533 | 2.742592 | 1.196967 | 166.7842 | 4.49E-22 | 5.72E-21 |
| LOC114322283 | 18.66302 | 17.62679 | 16.16707 | 2.050944 | 2.758693 | 3.295146 | 2.559347 | 2.69702  | 433.5631 | 5.45E-36 | 2.04E-34 |
| LOC114322284 | 3.327624 | 2.870887 | 3.6562   | 0.336057 | 0.3969   | 0.285843 | 3.166302 | 2.822381 | 620.0669 | 2.64E-41 | 1.45E-39 |
| LOC114322286 | 7.308495 | 8.187148 | 7.247724 | 14.58003 | 14.05474 | 14.26876 | -1.02103 | 3.157702 | 150.8765 | 7.15E-21 | 8.22E-20 |
| LOC114322404 | 0.328609 | 0.259009 | 0.433268 | 2.329678 | 1.552109 | 1.490415 | -2.45    | 0.003167 | 73.93244 | 2.52E-13 | 1.56E-12 |
| LOC114322408 | 0.76349  | 1.006018 | 0.838878 | 0.383884 | 0.209255 | 0.24559  | 1.55859  | 0.214546 | 34.84341 | 6.37E-08 | 2.38E-07 |
| LOC114322445 | 2.854509 | 2.903122 | 2.428156 | 9.331809 | 8.467808 | 9.143673 | -1.81907 | 2.964489 | 366.6577 | 2.47E-33 | 7.44E-32 |
| LOC114322448 | 0.646347 | 0.419028 | 0.516486 | 0        | 0.028034 | 0.026919 | 4.5393   | -0.05699 | 108.1574 | 4.74E-17 | 3.98E-16 |
| LOC114322494 | 0.310408 | 0.61838  | 0.524706 | 2.430688 | 2.153073 | 2.034674 | -2.29151 | 0.793109 | 117.6162 | 5.78E-18 | 5.25E-17 |
| LOC114322500 | 0.095058 | 0.053518 | 0        | 1.295993 | 1.76873  | 1.959722 | -4.97326 | -0.77888 | 95.23386 | 9.98E-16 | 7.56E-15 |
| LOC114322518 | 0.356007 | 0.257698 | 0.46101  | 4.48388  | 4.786135 | 5.469637 | -3.88035 | 2.677088 | 839.7311 | 1.23E-46 | 9.78E-45 |
| LOC114322839 | 1.162292 | 1.502625 | 1.206111 | 2.934498 | 2.279718 | 2.189103 | -1.0258  | 1.425332 | 42.85132 | 3.66E-09 | 1.55E-08 |
| LOC114322964 | 4.38652  | 4.485855 | 4.703236 | 0.038521 | 0        | 0.029125 | 7.415832 | 1.730631 | 549.2225 | 7.26E-40 | 3.6E-38  |
| LOC114322991 | 1.718321 | 1.651681 | 1.28936  | 0        | 0        | 0        | 7.84928  | -0.56659 | 93.55773 | 1.87E-15 | 1.38E-14 |
| LOC114322950 | 1.494873 | 1.468075 | 1.605431 | 0.020432 | 0        | 0        | 7.584715 | 1.112671 | 347.8544 | 1.62E-32 | 4.61E-31 |
| LOC114323000 | 0.559592 | 0.404215 | 0.510439 | 0.009597 | 0        | 0.007256 | 6.225972 | 0.623207 | 222.0361 | 6.36E-26 | 1.11E-24 |
| LOC114323041 | 4.140966 | 3.443238 | 4.059868 | 10.88598 | 10.85084 | 11.12001 | -1.59706 | 1.839066 | 136.5572 | 1.13E-19 | 1.18E-18 |
| LOC114323033 | 1.41757  | 1.915417 | 1.112531 | 0        | 0        | 0        | 7.822939 | -0.58532 | 88.74809 | 7.2E-15  | 5.08E-14 |
| LOC114323138 | 1.369153 | 1.500734 | 1.464407 | 0.374433 | 0.41621  | 0.532889 | 1.580781 | 1.285789 | 81.20793 | 3.52E-14 | 2.35E-13 |
| LOC114323107 | 0.108005 | 0.334438 | 0.47468  | 0.932588 | 1.275344 | 0.742213 | -1.80728 | -0.38697 | 30.49258 | 4.78E-07 | 1.62E-06 |
| LOC114323117 | 1.131774 | 0.955781 | 1.1399   | 2.400257 | 2.362353 | 2.527704 | -1.27405 | 0.229365 | 29.61448 | 4.59E-07 | 1.56E-06 |
| LOC114323434 | 2.85647  | 2.276992 | 2.670235 | 0        | 0.012979 | 0        | 8.669439 | 2.13223  | 717.5188 | 2.12E-44 | 1.45E-42 |
| LOC114323544 | 0.472929 | 0.390513 | 0.536948 | 0.071642 | 0.022563 | 0.064999 | 3.037313 | 0.144581 | 87.70156 | 6.53E-15 | 4.63E-14 |

|              |          |          |          |          |          |          |          |          |          |          |          |
|--------------|----------|----------|----------|----------|----------|----------|----------|----------|----------|----------|----------|
| LOC114323612 | 0        | 0        | 0        | 0.45983  | 0.362055 | 0.43458  | -8.04224 | -0.68767 | 129.0451 | 7.07E-19 | 6.94E-18 |
| LOC114323754 | 0.832339 | 0.937212 | 0.945526 | 2.743994 | 3.089354 | 2.772664 | -1.77411 | 2.039462 | 183.6317 | 2.32E-23 | 3.31E-22 |
| LOC114324001 | 0.789789 | 0.843696 | 0.845524 | 0        | 0        | 0.055666 | 5.032034 | -0.42495 | 87.56751 | 6.76E-15 | 4.79E-14 |
| LOC114324023 | 3.221397 | 3.740639 | 2.986439 | 9.698876 | 9.173489 | 8.070941 | -1.53657 | 2.490272 | 180.3499 | 3.98E-23 | 5.58E-22 |
| LOC114324101 | 0.941672 | 0.65424  | 1.100696 | 2.003159 | 2.122078 | 2.478319 | -1.40023 | 1.257585 | 69.25713 | 9.39E-13 | 5.51E-12 |
| LOC114324081 | 0        | 0.038081 | 0.01858  | 0.491828 | 0.580873 | 0.720471 | -4.97304 | -0.77616 | 95.02388 | 1.05E-15 | 7.94E-15 |
| LOC114324134 | 0.153742 | 0.251015 | 0.168923 | 0.558952 | 0.407093 | 0.475433 | -1.4246  | 0.443465 | 40.29411 | 8.92E-09 | 3.64E-08 |
| LOC114255849 | 1.237059 | 1.071481 | 1.324357 | 0.749584 | 0.408598 | 0.479547 | 1.080552 | -0.11643 | 14.42558 | 0.000266 | 0.000628 |
| LOC114255855 | 0.567486 | 0.660287 | 0.394896 | 1.134746 | 1.164207 | 1.273922 | -1.24555 | 0.51997  | 33.8737  | 9.12E-08 | 3.35E-07 |
| LOC114255832 | 1.20615  | 0.890198 | 1.102517 | 0.350074 | 0.275636 | 0.431846 | 1.487673 | 1.139072 | 63.57168 | 4.9E-12  | 2.7E-11  |
| LOC114255911 | 37.36705 | 34.01598 | 37.29198 | 90.14205 | 88.71172 | 90.1303  | -1.41303 | 6.661603 | 1794.713 | 7.57E-60 | 1.74E-57 |
| LOC114255989 | 2.759477 | 3.604311 | 3.456426 | 6.922406 | 6.714347 | 7.661101 | -1.23062 | 1.533646 | 67.77179 | 1.44E-12 | 8.29E-12 |
| LOC114256144 | 2.744774 | 2.39273  | 1.978104 | 0        | 0.042243 | 0        | 6.838662 | 0.425253 | 195.5766 | 3.4E-24  | 5.15E-23 |
| LOC114256172 | 1.416674 | 1.445038 | 1.574871 | 0.363566 | 0.33397  | 0.320695 | 2.016728 | 0.803159 | 86.30237 | 9.34E-15 | 6.52E-14 |
| LOC114256160 | 2.320707 | 1.366858 | 1.216086 | 0.389412 | 0.30661  | 0.245352 | 2.303168 | -0.1033  | 47.42562 | 1.08E-09 | 4.81E-09 |
| LOC114256245 | 1.522703 | 1.5792   | 1.937224 | 0.218526 | 0.516181 | 1.046401 | 1.304247 | -0.06391 | 19.52268 | 3.05E-05 | 8.26E-05 |
| LOC114256252 | 0.465023 | 0.244354 | 0.204376 | 1.127105 | 0.976189 | 1.107821 | -1.87225 | -0.48616 | 33.57622 | 1.02E-07 | 3.72E-07 |
| LOC114256355 | 5.063079 | 3.586123 | 4.127399 | 1.48448  | 1.870127 | 1.234607 | 1.373417 | 0.222465 | 28.60375 | 6.8E-07  | 2.26E-06 |
| LOC114256360 | 0.825318 | 0.770902 | 1.040772 | 0.017049 | 0        | 0        | 7.052857 | 0.623641 | 228.8185 | 2.42E-26 | 4.36E-25 |
| LOC114256414 | 9.687404 | 9.115844 | 9.786385 | 1.335353 | 1.379979 | 1.472363 | 2.658706 | 3.413727 | 896.1661 | 2.82E-48 | 2.52E-46 |
| LOC114256439 | 0.629238 | 1.180867 | 0.614551 | 3.558618 | 2.40166  | 2.594472 | -1.89825 | -0.27711 | 39.36093 | 1.24E-08 | 4.99E-08 |
| LOC114256455 | 0.54132  | 0.8127   | 1.057371 | 4.810781 | 2.238273 | 2.975961 | -2.11746 | 0.086781 | 57.26771 | 6.62E-11 | 3.3E-10  |
| LOC114256479 | 0.775588 | 0.959209 | 0.796291 | 0.346692 | 0.382163 | 0.419397 | 1.015482 | 0.628263 | 22.91801 | 6.68E-06 | 1.98E-05 |
| LOC114256518 | 1.152533 | 1.014604 | 1.404481 | 2.704582 | 2.309454 | 3.312085 | -1.32919 | 1.542759 | 75.526   | 1.63E-13 | 1.02E-12 |
| LOC114256601 | 0.538664 | 0.570856 | 0.731112 | 1.497592 | 1.269858 | 1.088734 | -1.15156 | -0.07087 | 19.04403 | 3.43E-05 | 9.22E-05 |
| LOC114256708 | 1.686921 | 1.379067 | 1.472636 | 3.780642 | 3.737476 | 4.605247 | -1.52277 | 1.885574 | 125.4911 | 1.08E-18 | 1.04E-17 |

|              |          |          |          |          |          |          |          |          |          |          |          |
|--------------|----------|----------|----------|----------|----------|----------|----------|----------|----------|----------|----------|
| LOC114256668 | 1.338077 | 1.482565 | 1.658386 | 0.544854 | 0.490286 | 0.514935 | 1.424486 | 1.541374 | 80.68486 | 4.05E-14 | 2.68E-13 |
| LOC114256715 | 4.10538  | 3.359125 | 3.999534 | 7.313591 | 6.816155 | 8.501266 | -1.08643 | 2.668042 | 109.6577 | 3.37E-17 | 2.87E-16 |
| LOC114256779 | 3.178822 | 2.794832 | 2.870716 | 23.3516  | 20.56768 | 20.46833 | -2.95609 | 3.110082 | 893.5229 | 3.18E-48 | 2.82E-46 |
| LOC114256917 | 0.785041 | 0.985949 | 0.763031 | 2.030822 | 2.031163 | 1.61844  | -1.26078 | 0.501562 | 34.40937 | 7.47E-08 | 2.77E-07 |
| LOC114257017 | 3.755831 | 3.031232 | 4.055127 | 0.197325 | 0.248587 | 0.119353 | 4.146686 | 1.452184 | 319.1132 | 3.39E-31 | 8.79E-30 |
| LOC114257033 | 1.18349  | 1.05071  | 1.250337 | 0        | 0        | 0        | 8.307041 | -0.16846 | 132.0411 | 3.86E-19 | 3.86E-18 |
| LOC114257088 | 0.056731 | 0        | 0.020777 | 5.242258 | 5.413217 | 5.522928 | -7.66964 | 3.149841 | 1841.784 | 5.56E-57 | 1.03E-54 |
| LOC114257111 | 0.623451 | 0.491403 | 0.525176 | 0.15111  | 0.223085 | 0.142812 | 1.547794 | 0.194413 | 34.69647 | 6.72E-08 | 2.5E-07  |
| LOC114257175 | 0.581728 | 0.480351 | 0.553946 | 3.383926 | 3.330487 | 3.837726 | -2.79879 | 0.68866  | 156.709  | 2.44E-21 | 2.92E-20 |
| LOC114257193 | 8.971441 | 11.3497  | 11.42287 | 3.165763 | 3.550089 | 3.336447 | 1.541155 | 2.016739 | 121.6037 | 2.45E-18 | 2.3E-17  |
| LOC114257255 | 12.6063  | 13.91451 | 12.75757 | 1.758904 | 1.345333 | 1.633821 | 2.952385 | 2.99337  | 684.8003 | 1.34E-43 | 8.7E-42  |
| LOC114257267 | 0.878603 | 1.057871 | 1.127844 | 0.28464  | 0.224116 | 0.203251 | 2.012398 | 1.184757 | 108.7569 | 4.14E-17 | 3.49E-16 |
| LOC114257290 | 0.465832 | 0.754005 | 0.319893 | 3.704745 | 2.375265 | 2.160807 | -2.48835 | 0.773284 | 111.6477 | 7E-15    | 4.95E-14 |
| LOC114257299 | 0.764809 | 0.787359 | 0.648253 | 0        | 0.031276 | 0        | 5.578637 | -0.67379 | 76.48885 | 1.25E-13 | 7.94E-13 |
| LOC114257301 | 2.64609  | 1.797969 | 2.706861 | 1.119597 | 0.718286 | 1.442173 | 1.018425 | 1.251881 | 30.72946 | 6.57E-07 | 2.19E-06 |
| LOC114257333 | 0        | 0        | 0        | 3.418173 | 2.929829 | 3.402218 | -9.82439 | 1.057888 | 471.6231 | 6.52E-37 | 2.62E-35 |
| LOC114257461 | 0        | 1.028189 | 0.40132  | 18.92307 | 12.54685 | 12.04813 | -4.97512 | 0.312902 | 186.6562 | 7.33E-21 | 8.42E-20 |
| LOC114257527 | 2.657061 | 2.175887 | 3.981033 | 0        | 0        | 0        | 8.235222 | -0.23095 | 116.2212 | 5.42E-17 | 4.54E-16 |
| LOC114257507 | 0.132106 | 0.163627 | 0.261272 | 0.62438  | 0.586157 | 0.435761 | -1.65211 | -0.1852  | 33.15453 | 1.19E-07 | 4.33E-07 |
| LOC114257641 | 0.831039 | 0.617594 | 0.620906 | 2.598372 | 2.283763 | 2.512797 | -1.9253  | 1.543917 | 153.4877 | 4.4E-21  | 5.16E-20 |
| LOC114257671 | 1.259378 | 0.696137 | 1.031509 | 3.538048 | 3.572302 | 3.461779 | -1.91153 | 1.601434 | 151.7383 | 6.09E-21 | 7.05E-20 |
| LOC114257711 | 1.89477  | 1.759207 | 2.136649 | 0        | 0        | 0        | 9.489182 | 0.900914 | 307.0299 | 2.7E-30  | 6.54E-29 |
| LOC114257753 | 0.270175 | 0.290695 | 0.316642 | 0.425645 | 0.661685 | 0.61888  | -1.08968 | 1.156946 | 40.28798 | 8.94E-09 | 3.65E-08 |
| LOC114257950 | 0.117906 | 0.151728 | 0.42566  | 0.275571 | 0.602708 | 0.740802 | -1.38772 | -0.40972 | 13.74282 | 0.000922 | 0.001998 |
| LOC114257951 | 0.424415 | 0.565923 | 0.429508 | 1.380599 | 1.742457 | 1.396889 | -1.78482 | 1.45034  | 122.5507 | 2E-18    | 1.89E-17 |
| LOC114258036 | 1.155805 | 1.270447 | 1.511823 | 0.050025 | 0.078776 | 0        | 4.732041 | -0.22065 | 98.91169 | 4.1E-16  | 3.2E-15  |



|              |          |          |          |          |          |          |          |          |          |          |          |
|--------------|----------|----------|----------|----------|----------|----------|----------|----------|----------|----------|----------|
| LOC114258098 | 0.451903 | 0.273992 | 0.365573 | 0.893697 | 0.888468 | 0.825852 | -1.34683 | 1.931051 | 97.94831 | 6.18E-16 | 4.75E-15 |
| LOC114258102 | 0.778671 | 0.708632 | 0.714918 | 0.03878  | 0.122138 | 0.01466  | 3.489779 | 0.306975 | 112.4066 | 2.1E-17  | 1.81E-16 |
| LOC114258180 | 9.411498 | 7.636654 | 8.506516 | 2.883016 | 2.777751 | 2.466572 | 1.556574 | 3.018818 | 256.594  | 5.72E-28 | 1.16E-26 |
| LOC114258270 | 0.413621 | 0.383547 | 0.441096 | 0.729774 | 0.800957 | 0.9196   | -1.09826 | 0.661414 | 30.40626 | 3.38E-07 | 1.16E-06 |
| LOC114258272 | 1.475609 | 1.165988 | 1.479093 | 3.811822 | 3.11246  | 4.269635 | -1.54045 | 1.599949 | 105.0504 | 9.68E-17 | 7.94E-16 |
| LOC114258380 | 3.393494 | 3.758427 | 3.484077 | 1.14611  | 1.11474  | 0.968485 | 1.618029 | 1.936206 | 130.9877 | 3.47E-19 | 3.48E-18 |
| LOC114258401 | 0.438375 | 0.51507  | 0.984263 | 1.38589  | 1.063923 | 1.283591 | -1.04942 | 0.627225 | 23.40237 | 7.45E-06 | 2.19E-05 |
| LOC114258459 | 0.021161 | 0.023827 | 0.023251 | 1.346352 | 1.484102 | 1.250607 | -5.81215 | 0.006018 | 195.7306 | 3.32E-24 | 5.04E-23 |
| LOC114258516 | 1.869932 | 1.449715 | 1.616712 | 0        | 0        | 0        | 8.384263 | -0.1025  | 138.5078 | 1.08E-19 | 1.13E-18 |
| LOC114258668 | 2.070785 | 2.546108 | 2.432172 | 0.64902  | 0.579152 | 0.556132 | 1.876027 | 0.971552 | 85.33151 | 1.2E-14  | 8.29E-14 |
| LOC114258716 | 1.480846 | 1.279655 | 1.437873 | 0.031301 | 0.049291 | 0.023666 | 5.123874 | 0.460649 | 185.9674 | 1.58E-23 | 2.29E-22 |
| LOC114258780 | 1.750875 | 1.245146 | 1.822509 | 0        | 0        | 0        | 7.76331  | -0.64179 | 87.37606 | 8.64E-15 | 6.05E-14 |
| LOC114258835 | 0.988595 | 0.976636 | 1.137447 | 0.084768 | 0.080092 | 0.102545 | 3.400958 | 0.944466 | 190.5367 | 7.56E-24 | 1.12E-22 |
| LOC114258878 | 2.452398 | 2.793135 | 2.477749 | 0.358691 | 0.161384 | 0.34868  | 3.04688  | 0.714436 | 138.3333 | 7.94E-20 | 8.41E-19 |
| LOC114258907 | 0.805159 | 0.655843 | 0.715258 | 0.217988 | 0.220676 | 0.188359 | 1.688805 | -0.11624 | 32.12182 | 1.76E-07 | 6.26E-07 |
| LOC114258995 | 1.27114  | 2.357436 | 1.971747 | 5.301029 | 4.815983 | 4.521787 | -1.49272 | 0.489406 | 45.4874  | 1.49E-09 | 6.54E-09 |
| LOC114259009 | 0.838931 | 0.842512 | 0.921768 | 0        | 0.097358 | 0.031163 | 4.037224 | -0.47547 | 71.72855 | 4.67E-13 | 2.82E-12 |
| LOC114259091 | 0.965375 | 0.621149 | 1.212226 | 5.89138  | 6.217798 | 6.728828 | -2.84364 | 0.689203 | 156.7422 | 2.42E-21 | 2.9E-20  |
| LOC114259094 | 1.17143  | 1.38845  | 1.100808 | 0.140095 | 0.198552 | 0.127106 | 2.841269 | 0.542516 | 111.7473 | 2.11E-17 | 1.82E-16 |
| LOC114259098 | 12.47213 | 12.26913 | 12.12056 | 2.025757 | 2.126685 | 2.382511 | 2.382305 | 4.252948 | 1224.349 | 7.64E-54 | 1.08E-51 |
| LOC114259181 | 0.866671 | 0.957103 | 0.860685 | 0.030297 | 0.071565 | 0.091627 | 3.574227 | -0.02354 | 94.60589 | 1.16E-15 | 8.76E-15 |
| LOC114259345 | 1.300498 | 1.107197 | 1.63802  | 6.515616 | 6.62837  | 7.323997 | -2.44438 | 1.985035 | 297.7311 | 3.75E-30 | 9.01E-29 |
| LOC114259385 | 0.011062 | 0        | 0        | 0.301637 | 0.490831 | 0.456117 | -6.31964 | -0.72123 | 114.1634 | 1.23E-17 | 1.09E-16 |
| LOC114259396 | 2.177553 | 1.947113 | 2.11109  | 0        | 0        | 0        | 8.653782 | 0.139214 | 170.3514 | 3.31E-22 | 4.26E-21 |
| LOC114259480 | 0.108038 | 0.050688 | 0.069245 | 0.867403 | 0.502558 | 0.544452 | -3.09305 | 0.274955 | 120.1732 | 6.29E-18 | 5.7E-17  |
| LOC114259487 | 1.992297 | 0.981453 | 1.368137 | 5.43246  | 6.237782 | 6.160977 | -2.11787 | -0.09232 | 56.45105 | 4.26E-11 | 2.15E-10 |

|              |          |          |          |          |          |          |          |          |          |          |          |
|--------------|----------|----------|----------|----------|----------|----------|----------|----------|----------|----------|----------|
| LOC114259613 | 0.069592 | 0.03918  | 0        | 4.743993 | 5.777203 | 4.017204 | -6.92586 | 1.101508 | 423.488  | 6.02E-35 | 2.08E-33 |
| LOC114259512 | 2.192813 | 1.964662 | 2.176173 | 0        | 0        | 0        | 9.116491 | 0.557628 | 237.819  | 1.25E-26 | 2.3E-25  |
| LOC114259629 | 1.236822 | 0.506422 | 0.864785 | 6.131787 | 5.793556 | 4.636059 | -2.71094 | -0.17297 | 76.80341 | 1.15E-13 | 7.31E-13 |
| LOC114259724 | 0.264329 | 0.255115 | 0.290429 | 1.372865 | 1.297137 | 1.453174 | -2.429   | -0.52244 | 52.10842 | 1.68E-10 | 8.09E-10 |
| LOC114259677 | 2.632611 | 2.549948 | 2.441569 | 0.643228 | 0.749555 | 0.875385 | 1.62429  | 1.843536 | 124.6714 | 1.28E-18 | 1.23E-17 |
| LOC114259696 | 1.084138 | 1.095534 | 1.191188 | 0        | 0        | 0        | 7.969189 | -0.46184 | 103.6019 | 1.73E-16 | 1.39E-15 |
| LOC114259790 | 1.530216 | 1.85556  | 2.069308 | 0.855895 | 0.898538 | 0.647117 | 1.076682 | 0.132432 | 17.36109 | 7.14E-05 | 0.000184 |
| LOC114259853 | 0.1509   | 0.113275 | 0.136041 | 0.014067 | 0.02769  | 0.026589 | 2.378388 | -0.48278 | 40.03328 | 9.78E-09 | 3.98E-08 |
| LOC114259881 | 2.603656 | 1.940103 | 2.818676 | 12.66769 | 11.39898 | 12.36675 | -2.40277 | 2.550051 | 412.0936 | 3.54E-35 | 1.24E-33 |
| LOC114259908 | 3.446811 | 4.410343 | 3.385488 | 1.708824 | 1.420219 | 2.009762 | 1.012653 | 0.73626  | 24.11336 | 4.09E-06 | 1.24E-05 |
| LOC114259969 | 0.032297 | 0.036367 | 0.070973 | 0.64582  | 0.508497 | 0.932181 | -3.95718 | -0.46637 | 97.31463 | 6.02E-16 | 4.64E-15 |
| LOC114260127 | 3.069399 | 3.080469 | 3.313825 | 1.601108 | 1.27976  | 1.430649 | 1.037401 | 2.388684 | 78.95202 | 6.43E-14 | 4.18E-13 |
| LOC114260179 | 2.039849 | 2.154301 | 2.241267 | 4.500843 | 4.570713 | 4.833737 | -1.2209  | 2.883534 | 170.1994 | 2.22E-22 | 2.9E-21  |
| LOC114260215 | 0.279791 | 0.409557 | 0.614836 | 1.118942 | 1.081249 | 1.076725 | -1.43785 | -0.19957 | 25.74613 | 2.11E-06 | 6.64E-06 |
| LOC114260230 | 2.329751 | 2.191831 | 2.071413 | 0.222898 | 0.241316 | 0.168527 | 3.273286 | 1.304228 | 237.4505 | 7.31E-27 | 1.37E-25 |
| LOC114260275 | 0.848202 | 0.603204 | 0.490503 | 2.515698 | 2.300256 | 2.392893 | -1.96752 | 0.097737 | 57.66368 | 2.92E-11 | 1.5E-10  |
| LOC114260338 | 0        | 0        | 0        | 3.822942 | 4.515085 | 4.046575 | -9.84343 | 1.072499 | 475.5427 | 4.81E-37 | 1.95E-35 |
| LOC114260349 | 1.395507 | 1.890932 | 1.013538 | 0.042996 | 0.135415 | 0.227557 | 3.179757 | 0.158624 | 83.94269 | 1.31E-13 | 8.3E-13  |
| LOC114260522 | 5.342017 | 4.786663 | 5.9935   | 0        | 0        | 0        | 9.788019 | 1.178147 | 376.1689 | 2.32E-33 | 7.02E-32 |
| LOC114260612 | 0        | 0        | 0        | 1.488008 | 1.061769 | 1.23051  | -8.34212 | -0.40206 | 159.4424 | 2.21E-21 | 2.65E-20 |
| LOC114260846 | 0.96043  | 0.793057 | 1.09044  | 0.087295 | 0.080188 | 0.077001 | 3.425037 | 1.032543 | 199.5299 | 1.83E-24 | 2.84E-23 |
| LOC114260825 | 2.063081 | 1.806797 | 1.957685 | 0.757639 | 0.730761 | 0.630111 | 1.363547 | 2.93987  | 195.1327 | 3.64E-24 | 5.51E-23 |
| LOC114260881 | 2.262989 | 2.011674 | 1.906894 | 0        | 0.024353 | 0.023385 | 6.602775 | 0.968396 | 302.2742 | 2.23E-30 | 5.42E-29 |
| LOC114260928 | 3.198527 | 3.41198  | 2.880185 | 0.174868 | 0.27537  | 0.165265 | 3.805912 | 1.150145 | 244.0277 | 3E-27    | 5.73E-26 |
| LOC114260929 | 7.936751 | 6.236093 | 9.487071 | 0        | 0        | 0        | 10.12864 | 1.496554 | 424.6527 | 3.14E-27 | 5.98E-26 |
| LOC114260899 | 0.363382 | 0.388709 | 0.469135 | 0.049542 | 0.065013 | 0.062429 | 2.631387 | -0.18174 | 58.52769 | 2.24E-11 | 1.16E-10 |

|              |          |          |          |          |          |          |          |          |          |          |          |
|--------------|----------|----------|----------|----------|----------|----------|----------|----------|----------|----------|----------|
| LOC114261084 | 1.862008 | 1.485103 | 1.721937 | 0.16924  | 0.510806 | 0.554481 | 1.864852 | 1.100914 | 83.92459 | 6.02E-14 | 3.93E-13 |
| LOC114261155 | 0.350811 | 0.299665 | 0.398743 | 1.253435 | 0.883027 | 1.379961 | -1.83956 | 0.955367 | 91.10942 | 2.76E-15 | 2.02E-14 |
| LOC114261156 | 0.156132 | 0.175804 | 0.257323 | 2.696292 | 3.016852 | 3.111524 | -3.94328 | -0.64647 | 89.07563 | 4.61E-15 | 3.31E-14 |
| LOC114261168 | 0.195355 | 0.109985 | 0.13032  | 0.558046 | 0.549233 | 0.517813 | -1.97621 | 0.608872 | 83.1101  | 2.14E-14 | 1.45E-13 |
| LOC114261206 | 0.561743 | 0.587341 | 0.771513 | 1.167026 | 1.608035 | 1.571692 | -1.30385 | 0.702812 | 42.06477 | 4.8E-09  | 2.01E-08 |
| LOC114261307 | 1.812724 | 1.793992 | 2.054236 | 0.325088 | 0.19779  | 0.312822 | 2.662863 | 2.027559 | 291.3263 | 7.92E-30 | 1.85E-28 |
| LOC114261309 | 0.026387 | 0        | 0.028992 | 0.527627 | 1.170774 | 1.196769 | -5.543   | -0.73101 | 102.3088 | 2.21E-16 | 1.76E-15 |
| LOC114261319 | 1.575368 | 1.546971 | 1.549779 | 0        | 0        | 0.025177 | 6.914756 | 0.496237 | 214.8775 | 1.8E-25  | 3.05E-24 |
| LOC114261321 | 0.929442 | 0.881305 | 0.859972 | 2.934498 | 3.500796 | 3.428877 | -1.99015 | 0.413981 | 75.50372 | 1.64E-13 | 1.03E-12 |
| LOC114261452 | 1.413559 | 1.339019 | 1.725707 | 0.040787 | 0.032115 | 0.061676 | 4.832005 | 0.204292 | 144.8394 | 2.24E-20 | 2.47E-19 |
| LOC114261467 | 2.29208  | 2.083644 | 2.125625 | 0.344031 | 0.601951 | 0.693629 | 1.835349 | 1.033616 | 85.09935 | 1.27E-14 | 8.78E-14 |
| LOC114261522 | 1.89168  | 1.611174 | 1.718733 | 0.462907 | 0.433901 | 0.616649 | 1.668214 | 1.524694 | 104.3337 | 1.14E-16 | 9.32E-16 |
| LOC114261616 | 4.948608 | 5.323366 | 5.679976 | 12.20843 | 9.675749 | 9.108972 | -1.04983 | 2.437321 | 84.02618 | 1.68E-14 | 1.15E-13 |
| LOC114261626 | 0.049562 | 0        | 0.027228 | 1.216272 | 1.418744 | 0.851469 | -5.34995 | -0.42718 | 126.8617 | 8.1E-19  | 7.91E-18 |
| LOC114261669 | 1.287307 | 1.331178 | 1.587612 | 0.286542 | 0.639239 | 0.180538 | 1.793984 | 0.161991 | 40.09134 | 1.12E-08 | 4.5E-08  |
| LOC114261712 | 12.12419 | 8.370456 | 11.23078 | 21.23525 | 20.51991 | 19.27856 | -1.03863 | 3.415891 | 154.1741 | 1.77E-16 | 1.42E-15 |
| LOC114261730 | 0.118714 | 0.133671 | 0.086957 | 0.719334 | 0.962845 | 1.006154 | -3.07725 | -0.30886 | 84.89356 | 1.34E-14 | 9.25E-14 |
| LOC114261762 | 4.850119 | 4.327762 | 4.955565 | 10.83664 | 9.505398 | 9.415055 | -1.17264 | 4.095602 | 338.904  | 4.09E-32 | 1.13E-30 |
| LOC114261800 | 5.055685 | 4.518008 | 5.554892 | 1.896418 | 2.067474 | 1.985295 | 1.234527 | 1.445413 | 59.21655 | 1.81E-11 | 9.52E-11 |
| LOC114261840 | 11.04482 | 9.161862 | 9.8239   | 2.868216 | 2.258337 | 2.041008 | 1.98394  | 2.600412 | 272.98   | 7.21E-29 | 1.57E-27 |
| LOC114261985 | 0.214219 | 0.206752 | 0.145706 | 0.64902  | 0.408813 | 0.434624 | -1.45778 | 0.075344 | 32.06815 | 1.8E-07  | 6.38E-07 |
| LOC114262204 | 0.994428 | 1.093684 | 0.762293 | 0        | 0        | 0        | 7.99436  | -0.44008 | 103.0466 | 1.96E-16 | 1.57E-15 |
| LOC114262185 | 0.681077 | 0.598549 | 0.711824 | 0.030197 | 0        | 0.022831 | 5.005199 | -0.44753 | 87.48548 | 6.9E-15  | 4.88E-14 |
| LOC114262225 | 2.28079  | 2.024062 | 2.357338 | 0.386498 | 0.331981 | 0.451612 | 2.392348 | 1.095282 | 136.7102 | 1.1E-19  | 1.15E-18 |
| LOC114262241 | 1.626877 | 1.33014  | 1.616735 | 0        | 0        | 0        | 9.832854 | 1.218466 | 388.3842 | 7.46E-34 | 2.34E-32 |
| LOC114262292 | 2.473159 | 2.271787 | 2.288306 | 4.495761 | 5.123411 | 4.651412 | -1.12546 | 0.766723 | 34.48275 | 7.27E-08 | 2.7E-07  |

|              |          |          |          |          |          |          |          |          |          |          |          |
|--------------|----------|----------|----------|----------|----------|----------|----------|----------|----------|----------|----------|
| LOC114262417 | 2.810153 | 2.531381 | 2.280098 | 1.257442 | 0.80443  | 1.247812 | 1.109031 | 0.445624 | 23.29286 | 5.72E-06 | 1.71E-05 |
| LOC114262467 | 9.193268 | 6.901066 | 8.73819  | 18.43594 | 16.23895 | 15.49319 | -1.10552 | 3.388055 | 189.4008 | 1.45E-21 | 1.78E-20 |
| LOC114262470 | 0        | 0        | 0        | 0.806361 | 0.739269 | 0.7934   | -9.73586 | 0.968336 | 446.1187 | 5.01E-36 | 1.88E-34 |
| LOC114262513 | 2.407927 | 2.401455 | 2.948055 | 0        | 0        | 0        | 7.863769 | -0.55245 | 95.26693 | 1.23E-15 | 9.26E-15 |
| LOC114262521 | 0.193033 | 0.160156 | 0.167442 | 1.218915 | 0.916109 | 1.172926 | -2.74765 | 0.945181 | 178.0463 | 5.85E-23 | 8.06E-22 |
| LOC114262545 | 1.846746 | 1.572253 | 2.152822 | 0.593625 | 0.773629 | 0.820261 | 1.22176  | 1.82306  | 70.69622 | 6.24E-13 | 3.72E-12 |
| LOC114262551 | 0.758605 | 0.664368 | 0.694593 | 2.451572 | 1.809642 | 2.432796 | -1.74466 | 0.126557 | 48.0148  | 6.39E-10 | 2.91E-09 |
| LOC114262579 | 1.123675 | 1.05141  | 1.391131 | 0.172618 | 0.40774  | 0.23927  | 1.969605 | 0.583055 | 66.21989 | 2.25E-12 | 1.28E-11 |
| LOC114262623 | 0.832088 | 0.870006 | 0.979554 | 2.917134 | 3.828089 | 4.084365 | -2.13082 | 0.248386 | 73.96683 | 2.5E-13  | 1.55E-12 |
| LOC114262674 | 26.75921 | 25.25393 | 27.50162 | 8.025866 | 8.481795 | 8.490746 | 1.560913 | 4.946898 | 977.0123 | 8.38E-50 | 8.57E-48 |
| LOC114262734 | 3.889057 | 3.608958 | 3.801558 | 0.999497 | 1.190053 | 1.124318 | 1.653795 | 2.464236 | 192.6428 | 5.4E-24  | 8.09E-23 |
| LOC114262801 | 3.922825 | 4.05675  | 3.743043 | 0.018766 | 0        | 0.014188 | 8.242146 | 2.519247 | 955.4949 | 2.08E-49 | 2.06E-47 |
| LOC114262807 | 0.035661 | 0.020077 | 0.058773 | 1.912344 | 1.607798 | 1.715433 | -5.50671 | 0.607181 | 289.9896 | 9.27E-30 | 2.16E-28 |
| LOC114262937 | 0.999029 | 0.680174 | 0.970038 | 3.083071 | 3.757647 | 2.93772  | -1.9813  | 1.457061 | 147.0607 | 1.47E-20 | 1.64E-19 |
| LOC114263012 | 0.016512 | 0.037184 | 0        | 0.660329 | 0.567187 | 0.862349 | -5.21564 | -0.55656 | 115.4582 | 9.26E-18 | 8.28E-17 |
| LOC114263122 | 1.866676 | 1.451293 | 2.099828 | 0.727132 | 1.081426 | 0.671932 | 1.009529 | -0.0211  | 13.6116  | 0.000386 | 0.000891 |
| LOC114263101 | 1.292856 | 1.294003 | 1.432656 | 0.040174 | 0.047448 | 0.015187 | 5.144951 | 0.990566 | 276.2034 | 4.85E-29 | 1.07E-27 |
| LOC114263295 | 3.209484 | 2.710404 | 2.889684 | 6.320458 | 4.912715 | 6.616671 | -1.11452 | 1.61622  | 58.5731  | 2.21E-11 | 1.15E-10 |
| LOC114263541 | 1.865974 | 1.519932 | 1.744871 | 0        | 0        | 0        | 8.066352 | -0.38027 | 110.6619 | 3.5E-17  | 2.97E-16 |
| LOC114263575 | 1.670645 | 1.416663 | 1.654313 | 6.073869 | 6.671688 | 6.91675  | -2.15832 | 2.600238 | 371.7931 | 1.5E-33  | 4.59E-32 |
| LOC114263641 | 0        | 0.032657 | 0.031866 | 2.372453 | 2.490653 | 2.192349 | -6.63816 | 0.322228 | 257.0274 | 5.41E-28 | 1.1E-26  |
| LOC114263648 | 1.585973 | 1.473287 | 2.178218 | 0        | 0.907996 | 0.54494  | 1.626702 | -0.06673 | 15.3152  | 0.001149 | 0.002452 |
| LOC114263707 | 34.65185 | 34.41656 | 34.93411 | 75.43203 | 80.88622 | 84.2921  | -1.31678 | 5.724927 | 1142.584 | 1.34E-52 | 1.73E-50 |
| LOC114263822 | 0.141567 | 0.136632 | 0.155545 | 2.757247 | 3.068295 | 2.557196 | -4.34813 | 1.154083 | 357.6748 | 6.01E-33 | 1.76E-31 |
| LOC114263807 | 0.488274 | 0.261807 | 0.562034 | 0.929862 | 0.898538 | 1.022604 | -1.21294 | -0.06887 | 20.71573 | 1.68E-05 | 4.71E-05 |
| LOC114263816 | 2.687063 | 2.296234 | 2.662421 | 5.40795  | 4.807463 | 5.012062 | -1.09067 | 2.283394 | 87.62237 | 6.66E-15 | 4.73E-14 |

|              |          |          |          |          |          |          |          |          |          |          |          |
|--------------|----------|----------|----------|----------|----------|----------|----------|----------|----------|----------|----------|
| LOC114263885 | 0.198334 | 0.148882 | 0.174334 | 0.576856 | 0.719146 | 0.690561 | -2.02757 | -0.00265 | 57.11364 | 3.46E-11 | 1.77E-10 |
| LOC114263929 | 2.42017  | 1.70987  | 1.798831 | 0.172527 | 0.101881 | 0.326106 | 3.157081 | 0.58339  | 124.3751 | 1.88E-18 | 1.78E-17 |
| LOC114264045 | 0.03078  | 0.103974 | 0        | 8.952368 | 9.295597 | 9.814491 | -7.68717 | 2.233907 | 970.7104 | 1.09E-49 | 1.11E-47 |
| LOC114264132 | 0.225087 | 0.285128 | 0.340054 | 2.199275 | 2.134342 | 1.933495 | -2.97067 | 0.376961 | 134.4682 | 1.71E-19 | 1.77E-18 |
| LOC114264149 | 9.193268 | 9.354778 | 8.97869  | 5.446782 | 3.508866 | 3.930959 | 1.014337 | 2.585567 | 80.9489  | 4.62E-14 | 3.05E-13 |
| LOC114264136 | 13.37624 | 12.33638 | 11.44907 | 3.795116 | 4.33678  | 4.621468 | 1.427562 | 3.753511 | 383.5206 | 4.69E-33 | 1.39E-31 |
| LOC114264139 | 2.057153 | 2.016083 | 1.757996 | 0        | 0        | 0.052358 | 6.181437 | -0.15747 | 122.405  | 2.07E-18 | 1.95E-17 |
| LOC114264179 | 0.661112 | 0.431758 | 0.66828  | 0.096143 | 0.03785  | 0.109036 | 2.741474 | -0.19906 | 58.43572 | 2.3E-11  | 1.2E-10  |
| LOC114264181 | 2.429187 | 2.474758 | 2.255982 | 0.105139 | 0        | 0.039746 | 5.525402 | 0.474    | 189.366  | 9.12E-24 | 1.35E-22 |
| LOC114264336 | 3.436275 | 3.214444 | 3.833665 | 0        | 0        | 0        | 9.676041 | 1.074271 | 350.9586 | 2.67E-32 | 7.5E-31  |
| LOC114264350 | 0.300583 | 0.324354 | 0.316503 | 0.81961  | 0.806667 | 0.722963 | -1.41569 | 0.45131  | 42.22961 | 4.54E-09 | 1.9E-08  |
| LOC114264363 | 3.511317 | 2.803558 | 2.665549 | 0.116054 | 0.54826  | 0.263234 | 3.07684  | -0.15999 | 69.97527 | 7.66E-13 | 4.53E-12 |
| LOC114264322 | 4.631354 | 4.797034 | 4.33841  | 2.104744 | 2.082129 | 2.101376 | 1.024441 | 2.770714 | 103.8073 | 1.29E-16 | 1.05E-15 |
| LOC114264374 | 5.904239 | 6.845143 | 5.862538 | 0        | 0        | 0        | 9.775599 | 1.169354 | 373.1032 | 3.1E-33  | 9.3E-32  |
| LOC114264492 | 0.272838 | 0.443756 | 0.599558 | 1.157267 | 1.214924 | 1.499956 | -1.68119 | -0.13897 | 35.76521 | 4.54E-08 | 1.72E-07 |
| LOC114264581 | 0.771971 | 1.109027 | 0.965189 | 0.241949 | 0.419106 | 0.365861 | 1.314145 | -0.27357 | 18.00828 | 5.37E-05 | 0.000141 |
| LOC114264583 | 1.500902 | 2.015014 | 2.029666 | 0        | 0        | 0        | 7.627394 | -0.75099 | 79.43727 | 6.72E-14 | 4.35E-13 |
| LOC114264514 | 0.3072   | 0.487413 | 0.5063   | 0        | 0        | 0        | 7.578798 | -0.7903  | 74.95975 | 2.23E-13 | 1.39E-12 |
| LOC114264522 | 0.396493 | 0.350783 | 0.311174 | 1.544473 | 1.216066 | 1.167729 | -1.95892 | -0.11828 | 48.8467  | 4.85E-10 | 2.24E-09 |
| LOC114264586 | 1.819943 | 1.814092 | 1.966867 | 0.379645 | 0.341622 | 0.615081 | 1.92748  | 0.348115 | 56.11707 | 4.72E-11 | 2.38E-10 |
| LOC114264542 | 0.866784 | 0.918585 | 0.840328 | 1.807373 | 1.970397 | 1.804481 | -1.19491 | 1.723864 | 74.03151 | 2.46E-13 | 1.52E-12 |
| LOC114264664 | 0.456074 | 0.366813 | 0.572695 | 1.006718 | 1.119044 | 1.343204 | -1.42373 | -0.31404 | 23.89433 | 4.47E-06 | 1.35E-05 |
| LOC114264673 | 0.315534 | 0.177645 | 0.260018 | 4.588674 | 4.403305 | 3.469358 | -4.05972 | -0.2129  | 124.9107 | 1.22E-18 | 1.17E-17 |
| LOC114264721 | 4.278589 | 4.680033 | 5.271907 | 0        | 0.043742 | 0        | 7.778466 | 1.293758 | 394.012  | 1.83E-34 | 6.04E-33 |
| LOC114264896 | 1.957982 | 1.860691 | 2.059772 | 0.656318 | 0.39751  | 0.591649 | 1.7461   | 1.488238 | 108.7884 | 4.11E-17 | 3.47E-16 |
| LOC114264907 | 11.42994 | 10.82258 | 10.43828 | 0.404758 | 0.743617 | 0.459038 | 4.204876 | 2.230219 | 566.4357 | 2.21E-40 | 1.15E-38 |

|              |          |          |          |          |          |          |          |          |          |          |          |
|--------------|----------|----------|----------|----------|----------|----------|----------|----------|----------|----------|----------|
| LOC114264923 | 0.146993 | 0.082757 | 0.060565 | 2.371456 | 2.261685 | 2.19704  | -4.59191 | 0.981071 | 329.8699 | 1.06E-31 | 2.84E-30 |
| LOC114264961 | 1.532954 | 1.874054 | 1.756505 | 4.219763 | 4.356863 | 4.544865 | -1.45738 | 2.09562  | 133.7244 | 1.99E-19 | 2.05E-18 |
| LOC114264999 | 0.40068  | 0.29193  | 0.38845  | 1.328194 | 1.180714 | 1.230964 | -1.87834 | 1.070277 | 107.3595 | 5.69E-17 | 4.75E-16 |
| LOC114265001 | 0        | 0        | 0        | 0.769896 | 0.541702 | 0.64402  | -8.89591 | 0.135948 | 237.2119 | 1.36E-26 | 2.49E-25 |
| LOC114265104 | 0.864636 | 0.973578 | 0.747882 | 0.200649 | 0.236977 | 0.278126 | 1.71515  | 0.005966 | 35.82161 | 4.44E-08 | 1.69E-07 |
| LOC114265156 | 0.019491 | 0.036579 | 0.014277 | 0.484232 | 0.502158 | 0.482198 | -4.44347 | 0.277507 | 195.7286 | 3.32E-24 | 5.04E-23 |
| LOC114265247 | 0.235418 | 0.246146 | 0.221712 | 1.895197 | 1.516282 | 1.363567 | -2.83557 | 0.732571 | 158.9534 | 1.62E-21 | 1.97E-20 |
| LOC114265361 | 1.415392 | 1.154875 | 1.374843 | 6.339102 | 5.842636 | 6.033294 | -2.3027  | 2.467381 | 374.3252 | 1.17E-33 | 3.62E-32 |
| LOC114265408 | 0.532249 | 0.449483 | 0.629789 | 0        | 0        | 0.014068 | 6.220954 | -0.12332 | 124.3966 | 1.36E-18 | 1.3E-17  |
| LOC114265461 | 2.732311 | 2.549163 | 3.516751 | 7.521236 | 6.871718 | 7.564223 | -1.42296 | 2.010761 | 118.6371 | 4.63E-18 | 4.24E-17 |
| LOC114265468 | 0.159136 | 0.140789 | 0.212317 | 0.475246 | 0.309116 | 0.42181  | -1.31583 | -0.309   | 20.36234 | 1.95E-05 | 5.43E-05 |
| LOC114265469 | 0.930593 | 1.164273 | 1.103631 | 0.617587 | 0.422841 | 0.345129 | 1.131592 | 0.717668 | 28.6467  | 6.69E-07 | 2.23E-06 |
| LOC114265546 | 3.143615 | 2.6669   | 3.075498 | 8.278242 | 7.874002 | 7.501836 | -1.51179 | 3.948218 | 526.1747 | 3.75E-39 | 1.78E-37 |
| LOC114265569 | 1.692279 | 1.56743  | 1.859378 | 0.099234 | 0.039067 | 0        | 5.125357 | 0.119444 | 137.1979 | 9.94E-20 | 1.05E-18 |
| LOC114265574 | 0.112199 | 0.09024  | 0.035222 | 1.107201 | 1.078245 | 1.431917 | -3.98394 | 0.305747 | 175.4941 | 8.99E-23 | 1.22E-21 |
| LOC114265696 | 0.388577 | 0.324624 | 0.330538 | 2.027945 | 2.475838 | 2.27406  | -2.80065 | 1.678225 | 304.0218 | 1.83E-30 | 4.47E-29 |
| LOC114265700 | 2.353986 | 2.234261 | 2.627047 | 7.393255 | 5.680081 | 7.5886   | -1.61839 | 3.529667 | 374.7729 | 1.34E-23 | 1.96E-22 |
| LOC114265702 | 1.298448 | 1.158941 | 1.061295 | 0.057569 | 0.135985 | 0.174106 | 3.069654 | 0.432726 | 112.6007 | 1.74E-17 | 1.52E-16 |
| LOC114265760 | 0.166224 | 0.167971 | 0.187321 | 0.480367 | 0.433128 | 0.398338 | -1.42431 | 1.14433  | 68.94031 | 1.03E-12 | 6.01E-12 |
| LOC114265826 | 1.273936 | 0.882738 | 0.915206 | 2.048582 | 1.893504 | 2.020266 | -1.04245 | -0.02624 | 16.45808 | 0.000106 | 0.000267 |
| LOC114265953 | 7.36702  | 7.760071 | 7.415563 | 0.0864   | 0.136056 | 0.130648 | 5.777457 | 1.336055 | 386.3236 | 3.74E-34 | 1.2E-32  |
| LOC114265903 | 1.589664 | 1.2635   | 1.669573 | 7.436794 | 6.45776  | 7.5184   | -2.34007 | 2.505586 | 383.6887 | 4.8E-34  | 1.53E-32 |
| LOC114265915 | 0.492412 | 0.542402 | 0.423418 | 0        | 0        | 0        | 8.137172 | -0.31567 | 115.6979 | 1.16E-17 | 1.03E-16 |
| LOC114265921 | 0.424985 | 0.615256 | 0.344653 | 0.846124 | 0.782072 | 0.959593 | -1.01471 | 1.022491 | 31.0179  | 2.81E-07 | 9.76E-07 |
| LOC114266028 | 0        | 0        | 0        | 2.57397  | 2.089991 | 2.310995 | -8.44252 | -0.3083  | 173.2794 | 2.02E-22 | 2.65E-21 |
| LOC114266031 | 0.648442 | 0.687195 | 0.565785 | 0        | 0        | 0        | 7.689306 | -0.70165 | 83.97708 | 2.05E-14 | 1.39E-13 |

|              |          |          |          |          |          |          |          |          |          |          |          |
|--------------|----------|----------|----------|----------|----------|----------|----------|----------|----------|----------|----------|
| LOC114266079 | 2.050222 | 1.6643   | 1.624014 | 0        | 0        | 0        | 7.862388 | -0.55693 | 94.9239  | 1.34E-15 | 1E-14    |
| LOC114266196 | 0.980402 | 0.833155 | 0.873962 | 0.134505 | 0.105905 | 0.279662 | 2.214583 | -0.02969 | 50.81977 | 2.55E-10 | 1.21E-09 |
| LOC114266320 | 30.01271 | 27.47058 | 31.05205 | 76.29303 | 77.74602 | 82.87242 | -1.52601 | 5.78281  | 1528.604 | 5.37E-57 | 1.01E-54 |
| LOC114266321 | 4.057756 | 4.111346 | 4.307036 | 0.488412 | 0.493025 | 0.568113 | 2.893049 | 3.340875 | 938.0293 | 4.41E-49 | 4.25E-47 |
| LOC114266407 | 1.038355 | 0.691967 | 0.814917 | 0.192607 | 0.181982 | 0.291248 | 1.804541 | -0.20899 | 32.38987 | 1.59E-07 | 5.68E-07 |
| LOC114266448 | 3.708737 | 4.235348 | 4.45697  | 8.063372 | 8.520399 | 9.0361   | -1.15813 | 4.200197 | 339.0435 | 2.17E-31 | 5.71E-30 |
| LOC114266691 | 2.889372 | 2.584282 | 2.915747 | 1.192026 | 1.305186 | 1.309635 | 1.028482 | 2.591165 | 90.51046 | 3.21E-15 | 2.34E-14 |
| LOC114266706 | 1.71105  | 1.64121  | 1.763952 | 0.211199 | 0.347699 | 0.479043 | 2.144725 | 1.593078 | 157.7169 | 2.03E-21 | 2.45E-20 |
| LOC114266707 | 3.780793 | 3.208759 | 3.131087 | 0.871923 | 0.928825 | 1.202134 | 1.630609 | 1.281339 | 84.46068 | 1.5E-14  | 1.03E-13 |
| LOC114266751 | 1.337369 | 1.217516 | 0.906665 | 0.206902 | 0.447996 | 0.312865 | 1.689078 | -0.17462 | 29.49366 | 4.81E-07 | 1.63E-06 |
| LOC114266820 | 2.731039 | 2.453205 | 1.955517 | 0        | 0        | 0.042175 | 6.787133 | 0.378774 | 188.2042 | 1.1E-23  | 1.62E-22 |
| LOC114266854 | 2.63668  | 2.163053 | 2.565941 | 1.095546 | 1.078245 | 0.880079 | 1.173948 | 0.567721 | 28.72923 | 6.48E-07 | 2.16E-06 |
| LOC114266918 | 1.835901 | 1.848572 | 2.152953 | 0.673886 | 0.606394 | 0.630815 | 1.505703 | 1.198266 | 70.5409  | 6.52E-13 | 3.88E-12 |
| LOC114266927 | 3.766686 | 2.767993 | 2.918813 | 0.144151 | 0.05675  | 0.054494 | 5.096406 | 0.434736 | 175.6872 | 8.7E-23  | 1.18E-21 |
| LOC114266981 | 0.048291 | 0        | 0.053059 | 3.335797 | 2.972086 | 2.654837 | -6.23779 | -0.0637  | 188.3334 | 1.08E-23 | 1.58E-22 |
| LOC114266967 | 11.07267 | 10.0633  | 10.60181 | 4.217325 | 3.81112  | 3.98574  | 1.301415 | 3.060001 | 205.4923 | 7.34E-25 | 1.17E-23 |
| LOC114267008 | 0.745624 | 0.767194 | 0.805123 | 0.210322 | 0.128801 | 0.14135  | 2.185258 | 0.259506 | 63.87263 | 4.48E-12 | 2.48E-11 |
| LOC114267218 | 0.028891 | 0.032531 | 0.095232 | 1.102899 | 1.075144 | 1.111824 | -4.39499 | -0.67066 | 95.79639 | 8.7E-16  | 6.61E-15 |
| LOC114267357 | 2.130503 | 2.185338 | 2.196572 | 0.928429 | 0.793672 | 0.621733 | 1.387782 | 1.644455 | 81.98269 | 2.87E-14 | 1.93E-13 |
| LOC114267373 | 0.801017 | 0.837519 | 0.58674  | 0.329357 | 0.191081 | 0.144168 | 1.691305 | 0.693392 | 53.82969 | 1.44E-10 | 6.98E-10 |
| LOC114267427 | 3.861767 | 3.228314 | 4.307374 | 1.489092 | 2.09368  | 0.723765 | 1.308058 | 0.52882  | 30.48044 | 4.09E-07 | 1.39E-06 |
| LOC114267435 | 3.110947 | 2.953442 | 2.814929 | 1.330623 | 1.004034 | 1.550984 | 1.084838 | 1.131073 | 36.92445 | 2.97E-08 | 1.15E-07 |
| LOC114267444 | 0.967057 | 1.001791 | 1.232553 | 2.601746 | 2.657549 | 2.179761 | -1.31391 | 0.516554 | 37.94414 | 2.06E-08 | 8.1E-08  |
| LOC114267556 | 1.886778 | 2.186386 | 1.972446 | 0.665985 | 0.603031 | 0.704944 | 1.50241  | 1.195551 | 69.99525 | 7.61E-13 | 4.5E-12  |
| LOC114267557 | 0.726108 | 0.664297 | 0.897531 | 0        | 0.012991 | 0.012475 | 6.072137 | 0.486847 | 199.5189 | 1.84E-24 | 2.84E-23 |
| LOC114267566 | 0.159859 | 0.112501 | 0.241511 | 0.690165 | 0.486211 | 0.71406  | -1.95716 | -0.62528 | 32.5646  | 1.49E-07 | 5.34E-07 |

|              |          |          |          |          |          |          |          |          |          |          |          |
|--------------|----------|----------|----------|----------|----------|----------|----------|----------|----------|----------|----------|
| LOC114267652 | 1.544002 | 1.127187 | 1.677817 | 2.991778 | 3.812714 | 3.38133  | -1.33752 | 2.133688 | 108.8376 | 6.58E-17 | 5.46E-16 |
| LOC114267675 | 0.701332 | 0.588927 | 0.653036 | 0        | 0        | 0        | 8.403726 | -0.08417 | 141.5849 | 5.96E-20 | 6.36E-19 |
| LOC114267906 | 0.462999 | 0.448928 | 0.508716 | 1.543023 | 1.675123 | 1.926712 | -1.96845 | 1.390876 | 145.6322 | 1.93E-20 | 2.14E-19 |
| LOC114267977 | 1.51803  | 1.022887 | 1.523457 | 2.629137 | 2.343825 | 2.727079 | -1.01962 | 2.328949 | 73.06834 | 4.73E-13 | 2.85E-12 |
| LOC114268023 | 0.064223 | 0.043389 | 0.056452 | 0.747175 | 1.011142 | 0.794414 | -4.01572 | 0.125679 | 158.5614 | 1.74E-21 | 2.11E-20 |
| LOC114268041 | 2.591901 | 2.562564 | 2.523687 | 5.056366 | 4.855873 | 4.604936 | -1.0193  | 2.426756 | 84.73077 | 1.4E-14  | 9.63E-14 |
| LOC114268046 | 0.585885 | 0.481406 | 0.60894  | 0.172708 | 0.181313 | 0.348212 | 1.108342 | -0.23398 | 13.70705 | 0.00037  | 0.000855 |
| LOC114268113 | 4.629447 | 6.492239 | 6.42757  | 0        | 0        | 0        | 9.741174 | 1.140396 | 340.1938 | 6.29E-29 | 1.38E-27 |
| LOC114268136 | 7.533372 | 6.638525 | 9.048401 | 35.46915 | 37.63812 | 40.77236 | -2.40318 | 3.911402 | 1076.632 | 4.51E-47 | 3.68E-45 |
| LOC114268221 | 0.237673 | 0.152925 | 0.13057  | 3.332929 | 3.498982 | 3.313237 | -4.35081 | 1.684505 | 511.3132 | 1.12E-38 | 5.1E-37  |
| LOC114268229 | 0.838353 | 0.757846 | 0.947081 | 0.107322 | 0.253506 | 0.178515 | 2.079842 | 0.505312 | 69.57557 | 8.58E-13 | 5.05E-12 |
| LOC114268396 | 1.15898  | 1.184175 | 1.167302 | 3.179736 | 2.81081  | 2.964568 | -1.45085 | 2.568735 | 182.2818 | 2.89E-23 | 4.11E-22 |
| LOC114268505 | 0.595889 | 0.694107 | 0.699882 | 0.112057 | 0.08823  | 0.155326 | 2.347509 | 0.326837 | 74.01884 | 2.47E-13 | 1.53E-12 |
| LOC114268547 | 9.49971  | 9.546475 | 10.54996 | 4.085087 | 3.72817  | 4.773307 | 1.120812 | 2.075508 | 74.35385 | 2.25E-13 | 1.39E-12 |
| LOC114268573 | 84.29069 | 77.99473 | 78.42688 | 26.11439 | 24.47573 | 24.59712 | 1.574279 | 6.49378  | 2019.906 | 5.19E-63 | 1.5E-60  |
| LOC114268609 | 283.5491 | 278.6564 | 270.0379 | 92.45913 | 92.45037 | 97.95163 | 1.451754 | 8.261157 | 2762.491 | 8.84E-39 | 4.07E-37 |
| LOC114268614 | 101.4702 | 102.9117 | 94.85347 | 28.17196 | 27.64731 | 27.24271 | 1.744167 | 6.986746 | 2705.189 | 6.73E-65 | 2.33E-62 |
| LOC114268672 | 0        | 0        | 0.026787 | 1.196592 | 1.081735 | 1.038737 | -6.55034 | -0.49637 | 139.4901 | 6.33E-20 | 6.74E-19 |
| LOC114268844 | 5.086968 | 4.328729 | 4.949272 | 1.552965 | 1.61181  | 2.241558 | 1.285957 | 1.403631 | 60.82547 | 1.11E-11 | 5.95E-11 |
| LOC114268841 | 2.05549  | 1.434976 | 1.851931 | 0.07473  | 0        | 0.226005 | 3.922163 | -0.31137 | 77.333   | 1.03E-13 | 6.57E-13 |
| LOC114268875 | 2.714314 | 2.17568  | 2.577947 | 5.854063 | 5.070222 | 4.868688 | -1.16824 | 1.375946 | 55.44035 | 5.84E-11 | 2.92E-10 |
| LOC114268922 | 2.418225 | 2.298064 | 2.581629 | 0.124706 | 0.09819  | 0.117858 | 4.293798 | 1.228154 | 294.9628 | 5.18E-30 | 1.23E-28 |
| LOC114268980 | 3.708737 | 3.828027 | 3.565576 | 7.30364  | 8.404783 | 9.274231 | -1.28579 | 1.845736 | 90.47338 | 3.24E-15 | 2.36E-14 |
| LOC114268981 | 1.509694 | 1.518588 | 1.172193 | 0.036591 | 0        | 0.082997 | 4.899662 | 0.262535 | 145.8285 | 1.86E-20 | 2.06E-19 |
| LOC114269160 | 0.316824 | 0.118914 | 0.154715 | 1.407828 | 1.763485 | 1.693389 | -3.09478 | -0.29501 | 85.05203 | 1.29E-14 | 8.88E-14 |
| LOC114269231 | 0.752263 | 0.580832 | 0.73208  | 0.312567 | 0.123052 | 0.02954  | 2.155182 | -0.53931 | 30.45606 | 3.58E-07 | 1.23E-06 |



|              |          |          |          |          |          |          |          |          |          |          |          |
|--------------|----------|----------|----------|----------|----------|----------|----------|----------|----------|----------|----------|
| LOC114269369 | 1.587285 | 1.356835 | 1.40617  | 0.271923 | 0.28547  | 0.239858 | 2.344104 | 1.676162 | 199.6501 | 1.8E-24  | 2.79E-23 |
| LOC114269315 | 0.997941 | 0.928257 | 1.001134 | 0        | 0.031051 | 0.029817 | 5.17506  | -0.30385 | 101.2375 | 2.36E-16 | 1.88E-15 |
| LOC114269314 | 1.039086 | 0.918234 | 0.693683 | 0.02391  | 0.075303 | 0.108465 | 3.459909 | 0.276946 | 109.7905 | 3.27E-17 | 2.79E-16 |
| LOC114269318 | 0.196737 | 0.073842 | 0.126095 | 1.400725 | 0.985556 | 1.01398  | -3.13001 | 0.242475 | 123.741  | 1.56E-18 | 1.48E-17 |
| LOC114269391 | 4.304784 | 4.335364 | 4.803291 | 1.482438 | 1.549918 | 1.488311 | 1.463075 | 2.760009 | 196.4278 | 2.97E-24 | 4.54E-23 |
| LOC114269394 | 1.563385 | 1.760369 | 1.953527 | 0.668695 | 0.833638 | 0.905832 | 1.001718 | 1.380996 | 37.82147 | 2.15E-08 | 8.45E-08 |
| LOC114269463 | 2.479338 | 2.290649 | 2.514602 | 0.924511 | 0.636938 | 0.698995 | 1.596944 | -0.23281 | 26.69706 | 1.44E-06 | 4.63E-06 |
| LOC114269505 | 1.482394 | 1.784287 | 1.993837 | 0.650451 | 0.402399 | 0.562042 | 1.606058 | 0.532813 | 46.94541 | 9.11E-10 | 4.09E-09 |
| LOC114269531 | 0.422867 | 0.371395 | 0.483206 | 0.199861 | 0.072629 | 0.220851 | 1.276837 | 0.194975 | 23.43283 | 5.52E-06 | 1.65E-05 |
| LOC114269576 | 0.70276  | 0.791306 | 0.280782 | 1.277492 | 1.341139 | 1.756133 | -1.41243 | 0.590717 | 38.67264 | 5.16E-08 | 1.95E-07 |
| LOC114269646 | 1.990241 | 1.890849 | 2.084256 | 0.537032 | 0.55637  | 0.812068 | 1.517172 | 1.396437 | 81.06721 | 3.66E-14 | 2.43E-13 |
| LOC114269660 | 0.738881 | 0.687286 | 0.953029 | 11.27081 | 10.02377 | 11.61222 | -3.887   | 2.494519 | 763.1706 | 1.82E-45 | 1.33E-43 |
| LOC114269805 | 1.283984 | 0.858422 | 1.410766 | 19.83945 | 21.9382  | 21.83824 | -4.25905 | 3.109026 | 1341.163 | 1.71E-55 | 2.75E-53 |
| LOC114269943 | 6.340225 | 5.295471 | 6.468679 | 2.08977  | 2.443191 | 2.537595 | 1.238733 | 1.889354 | 78.86974 | 6.57E-14 | 4.26E-13 |
| LOC114270034 | 0.314254 | 0.216241 | 0.306919 | 0.983833 | 1.124474 | 1.103772 | -2.03492 | 0.273215 | 70.20183 | 7.18E-13 | 4.26E-12 |
| LOC114270035 | 4.22901  | 3.809485 | 3.906286 | 0        | 0        | 0        | 10.74781 | 2.085634 | 734.4138 | 3.25E-44 | 2.19E-42 |
| LOC114270056 | 0.693703 | 0.644072 | 0.695341 | 0        | 0        | 0.033454 | 5.482269 | -0.03812 | 125.7453 | 1.02E-18 | 9.92E-18 |
| LOC114270279 | 1.32573  | 1.291044 | 1.673162 | 0        | 0        | 0        | 8.947272 | 0.405559 | 205.9899 | 1.14E-24 | 1.79E-23 |
| LOC114270403 | 0.598473 | 0.455087 | 0.426992 | 0.028258 | 0.022249 | 0        | 4.773774 | 0.151203 | 130.6164 | 3.74E-19 | 3.74E-18 |
| LOC114270495 | 2.677395 | 2.438676 | 2.548281 | 0.961005 | 1.269242 | 1.218791 | 1.029569 | 1.745894 | 51.84369 | 1.83E-10 | 8.78E-10 |
| LOC114270699 | 9.433092 | 8.457973 | 9.404853 | 0.158775 | 0        | 0        | 7.208092 | 0.764006 | 264.3224 | 2.13E-28 | 4.46E-27 |
| LOC114270803 | 1.375113 | 1.622815 | 1.278449 | 0.624928 | 0.567746 | 0.690561 | 1.070788 | 1.278844 | 39.78129 | 1.07E-08 | 4.33E-08 |
| LOC114270850 | 4.346176 | 3.874246 | 3.064167 | 0        | 0        | 0.049778 | 7.207662 | 0.760701 | 253.5333 | 8.52E-28 | 1.7E-26  |
| LOC114270856 | 0.734963 | 0.891226 | 0.844805 | 0.061663 | 0.178022 | 0.155405 | 2.461312 | 0.469443 | 85.95838 | 1.02E-14 | 7.09E-14 |
| LOC114270904 | 0        | 0        | 0        | 1.444432 | 1.268524 | 1.344112 | -8.19916 | -0.54109 | 145.5096 | 2.82E-20 | 3.09E-19 |
| LOC114270907 | 1.141901 | 1.071481 | 1.022311 | 0        | 0.0908   | 0.08719  | 3.902573 | -0.10548 | 93.82047 | 1.41E-15 | 1.05E-14 |

|              |          |          |          |          |          |          |          |          |          |          |          |
|--------------|----------|----------|----------|----------|----------|----------|----------|----------|----------|----------|----------|
| LOC114270932 | 0.461059 | 0.370822 | 0.343754 | 1.01772  | 0.966296 | 0.588416 | -1.19839 | 0.251441 | 24.93176 | 2.93E-06 | 9.06E-06 |
| LOC114271014 | 0.835635 | 0.741333 | 0.63992  | 0        | 0        | 0        | 8.503496 | 0.004236 | 150.3336 | 1.15E-20 | 1.3E-19  |
| LOC114271090 | 1.627974 | 1.437722 | 1.297701 | 0        | 0        | 0        | 8.147263 | -0.30953 | 116.9086 | 8.93E-18 | 7.99E-17 |
| LOC114271121 | 0.31577  | 0.304763 | 0.413035 | 0.601348 | 0.58109  | 0.847322 | -1.09177 | 0.112503 | 19.609   | 2.69E-05 | 7.35E-05 |
| LOC114271198 | 5.472183 | 4.4364   | 5.023791 | 2.520021 | 1.601268 | 1.838459 | 1.247956 | 2.128797 | 87.85415 | 7.34E-15 | 5.18E-14 |
| LOC114271221 | 2.858377 | 2.55931  | 2.686552 | 0.939039 | 0.911887 | 0.922973 | 1.442069 | 1.701745 | 94.03815 | 1.34E-15 | 1E-14    |
| LOC114271227 | 0.79105  | 0.662862 | 0.707456 | 1.805845 | 1.527185 | 1.769891 | -1.33186 | 1.025054 | 56.37958 | 4.35E-11 | 2.2E-10  |
| LOC114271228 | 1.618083 | 1.702486 | 1.57384  | 0.144658 | 0.208815 | 0.27343  | 2.809177 | 1.135236 | 172.9388 | 1.39E-22 | 1.85E-21 |
| LOC114271326 | 0.174326 | 0.168249 | 0.082088 | 2.7615   | 2.495113 | 2.738212 | -4.29105 | 0.784941 | 272.7764 | 7.4E-29  | 1.61E-27 |
| LOC114271391 | 0.840298 | 0.330061 | 0.644142 | 1.491989 | 1.454442 | 1.530922 | -1.38445 | 0.73896  | 44.91271 | 2.64E-09 | 1.13E-08 |
| LOC114271400 | 0.513136 | 0.4184   | 0.583246 | 1.383103 | 1.44357  | 1.459147 | -1.60185 | 0.761898 | 65.87474 | 2.49E-12 | 1.41E-11 |
| LOC114271423 | 1.105816 | 0.909915 | 1.425296 | 2.51272  | 2.495867 | 3.010439 | -1.33045 | 1.469285 | 72.98563 | 3.28E-13 | 2.01E-12 |
| LOC114271616 | 1.03512  | 1.276547 | 1.010959 | 2.508884 | 2.187062 | 2.303368 | -1.17576 | 1.686359 | 68.39419 | 1.2E-12  | 6.98E-12 |
| LOC114271632 | 1.276065 | 1.389891 | 1.64949  | 0.39419  | 0.441684 | 0.35535  | 1.746018 | 1.762788 | 128.6574 | 5.59E-19 | 5.53E-18 |
| LOC114271635 | 0.020049 | 0.04515  | 0.022029 | 1.093359 | 1.090441 | 1.184873 | -5.25039 | -0.17119 | 161.896  | 9.56E-22 | 1.19E-20 |
| LOC114271636 | 3.921036 | 4.049188 | 4.570031 | 15.7913  | 15.81323 | 16.31608 | -2.04191 | 3.838244 | 894.263  | 3.08E-48 | 2.73E-46 |
| LOC114271696 | 2.285667 | 2.258514 | 2.511358 | 0.084795 | 0.400586 | 0.064111 | 3.484409 | -0.09804 | 83.23332 | 2.07E-14 | 1.4E-13  |
| LOC114271737 | 3.659938 | 3.674631 | 4.322926 | 0        | 0        | 0.251511 | 5.21699  | 1.052465 | 245.2916 | 5.66E-23 | 7.82E-22 |
| LOC114271780 | 0.880628 | 0.649038 | 1.09073  | 0.174635 | 0.114585 | 0.11003  | 2.62589  | 0.077705 | 68.5003  | 1.17E-12 | 6.78E-12 |
| LOC114271922 | 1.437905 | 0.66875  | 0.858634 | 2.557032 | 1.92384  | 3.136233 | -1.44347 | 0.80887  | 47.32536 | 3.7E-09  | 1.57E-08 |
| LOC114271871 | 1.168828 | 0.990207 | 1.076315 | 0.101177 | 0.079663 | 0.076497 | 3.545455 | 0.756621 | 173.4231 | 1.28E-22 | 1.71E-21 |
| LOC114271981 | 1.122551 | 0.710995 | 0.86723  | 0.255075 | 0.075314 | 0.096427 | 2.637281 | 0.004578 | 63.19907 | 6.28E-12 | 3.42E-11 |
| LOC114272078 | 0.25774  | 0.306798 | 0.380283 | 0.655935 | 0.590242 | 0.769202 | -1.20709 | 1.053057 | 46.03715 | 1.24E-09 | 5.47E-09 |
| LOC114272223 | 0.528896 | 0.397024 | 0.59602  | 1.257265 | 1.067569 | 1.453828 | -1.41264 | 1.011241 | 60.07219 | 1.4E-11  | 7.41E-11 |
| LOC114272250 | 0.647312 | 0.50267  | 0.686704 | 1.05497  | 1.309868 | 1.288481 | -1.10324 | 0.371878 | 24.65063 | 3.28E-06 | 1.01E-05 |
| LOC114272378 | 3.77063  | 3.677256 | 4.10828  | 0.057358 | 0.045162 | 0.06505  | 5.942059 | 1.927339 | 592.3636 | 3.92E-41 | 2.13E-39 |

|              |          |          |          |          |          |          |          |          |          |          |          |
|--------------|----------|----------|----------|----------|----------|----------|----------|----------|----------|----------|----------|
| LOC114272623 | 1.271776 | 1.271716 | 1.147081 | 0.276043 | 0.230931 | 0.33915  | 2.008645 | 1.319302 | 122.7049 | 1.94E-18 | 1.83E-17 |
| LOC114272733 | 8.447257 | 8.510372 | 6.893169 | 2.424569 | 1.909024 | 2.579979 | 1.682295 | 1.682601 | 115.1431 | 9.92E-18 | 8.84E-17 |
| LOC114272818 | 1.342847 | 1.366887 | 1.416424 | 3.925218 | 4.289917 | 3.91269  | -1.6628  | 2.952285 | 314.2386 | 5.8E-31  | 1.48E-29 |
| LOC114272947 | 0        | 0        | 0        | 78.8898  | 57.78156 | 80.453   | -11.6997 | 2.954388 | 932.2815 | 1.1E-13  | 7.01E-13 |
| LOC114273000 | 2.461737 | 2.720579 | 2.804992 | 9.944442 | 6.981678 | 8.207905 | -1.74435 | 1.89111  | 154.8241 | 3.44E-21 | 4.08E-20 |
| LOC114273031 | 0.049973 | 0.056269 | 0        | 13.89872 | 15.44948 | 13.32438 | -8.45096 | 2.135252 | 944.509  | 3.33E-49 | 3.26E-47 |
| LOC114273051 | 0.872409 | 1.115078 | 1.075133 | 0.085723 | 0.185613 | 0.162032 | 2.650444 | 0.677899 | 111.3826 | 2.29E-17 | 1.97E-16 |
| LOC114273071 | 0        | 0        | 0        | 2.754758 | 2.169004 | 3.124184 | -8.26265 | -0.48394 | 150.0333 | 1.21E-20 | 1.37E-19 |
| LOC114273087 | 0.825865 | 0.906078 | 1.00048  | 0        | 0        | 0        | 8.056047 | -0.38551 | 109.8025 | 4.24E-17 | 3.57E-16 |
| LOC114273215 | 2.923398 | 2.869722 | 2.141373 | 0.817572 | 0.858305 | 1.030235 | 1.425755 | -0.30226 | 20.61112 | 1.75E-05 | 4.91E-05 |
| LOC114273256 | 1.626925 | 0.557539 | 1.165807 | 2.250241 | 2.885445 | 2.187436 | -1.21228 | 0.653407 | 28.99363 | 1.93E-06 | 6.12E-06 |
| LOC114273339 | 2.77277  | 2.662996 | 3.180965 | 0.148247 | 0        | 0.056043 | 5.296212 | 0.270033 | 157.1643 | 2.24E-21 | 2.7E-20  |
| LOC114273412 | 2.416826 | 2.123589 | 2.210331 | 0.076185 | 0.16996  | 0.192005 | 3.777379 | 2.380153 | 545.4601 | 9.45E-40 | 4.68E-38 |
| LOC114273576 | 0.870765 | 1.055901 | 0.910748 | 2.237361 | 2.240976 | 2.347528 | -1.3761  | 2.560374 | 161.3394 | 1.06E-21 | 1.31E-20 |
| LOC114273550 | 0.868308 | 0.832866 | 0.812706 | 8.652124 | 9.205935 | 9.149413 | -3.5245  | 2.235487 | 598.4852 | 2.63E-41 | 1.45E-39 |
| LOC114273585 | 1.789723 | 1.70856  | 1.695701 | 0        | 0.009281 | 0        | 8.564265 | 2.033756 | 692.7174 | 8.54E-44 | 5.63E-42 |
| LOC114273654 | 5.008101 | 6.117001 | 7.461165 | 1.38872  | 2.551341 | 2.099939 | 1.47061  | 0.638362 | 42.42464 | 4.24E-09 | 1.78E-08 |
| LOC114273635 | 0.392558 | 0.263107 | 0.390242 | 0.067962 | 0.040133 | 0.025692 | 2.893867 | -0.43162 | 52.60244 | 1.43E-10 | 6.94E-10 |
| LOC114273660 | 0.914244 | 1.173558 | 0.924157 | 0.066477 | 0.026171 | 0.025131 | 4.5517   | -0.03458 | 113.3596 | 1.47E-17 | 1.29E-16 |
| LOC114273703 | 2.197972 | 1.836225 | 2.142342 | 0.064444 | 0.050741 | 0        | 5.544107 | 0.017219 | 134.3196 | 1.77E-19 | 1.82E-18 |
| LOC114273942 | 1.001547 | 0.392257 | 0.861215 | 2.216423 | 1.308853 | 1.496223 | -1.19967 | -0.1758  | 17.70047 | 6.33E-05 | 0.000164 |
| LOC114274027 | 0.221187 | 0.249056 | 0.171549 | 1.371798 | 1.005617 | 1.609409 | -2.72917 | 0.865569 | 159.491  | 1.47E-21 | 1.8E-20  |
| LOC114274137 | 0.593646 | 0.454542 | 0.391358 | 1.122309 | 1.053604 | 0.750635 | -1.09366 | -0.03669 | 17.38238 | 7.07E-05 | 0.000182 |
| LOC114274181 | 8.552298 | 6.996702 | 9.029706 | 18.58299 | 17.11804 | 17.26409 | -1.20563 | 2.566314 | 125.319  | 1.12E-18 | 1.08E-17 |
| LOC114274208 | 6.584045 | 6.172269 | 6.179883 | 2.653507 | 2.965905 | 2.974281 | 1.027811 | 3.75486  | 226.0705 | 3.57E-26 | 6.36E-25 |
| LOC114274294 | 0.031803 | 0.017905 | 0.087359 | 0.664843 | 0.546235 | 0.480813 | -3.64487 | -0.7238  | 73.66455 | 2.72E-13 | 1.68E-12 |

|              |          |          |          |          |          |          |          |          |          |          |          |
|--------------|----------|----------|----------|----------|----------|----------|----------|----------|----------|----------|----------|
| LOC114274508 | 0        | 0        | 0.037076 | 7.544914 | 5.312742 | 8.023376 | -8.73581 | 1.659961 | 635.3903 | 5.57E-39 | 2.62E-37 |
| LOC114274530 | 8.279317 | 7.415619 | 8.122171 | 1.417076 | 1.365841 | 1.330024 | 2.431545 | 3.371945 | 755.8271 | 2.67E-45 | 1.93E-43 |
| LOC114274552 | 0.039912 | 0        | 0        | 3.047214 | 3.313283 | 3.510714 | -7.42743 | 0.342805 | 271.4757 | 8.69E-29 | 1.88E-27 |
| LOC114274563 | 1.663998 | 1.703325 | 1.828304 | 0.714965 | 0.43303  | 0.332654 | 1.748683 | 0.269153 | 44.35155 | 2.19E-09 | 9.46E-09 |
| LOC114274627 | 7.510749 | 6.724913 | 6.661555 | 49.51342 | 41.0575  | 45.02221 | -2.79037 | 3.149454 | 842.0088 | 3.51E-47 | 2.89E-45 |
| LOC114274640 | 0.654365 | 0.614011 | 0.479318 | 1.486897 | 1.201953 | 1.483942 | -1.34914 | 1.477429 | 76.25582 | 1.33E-13 | 8.44E-13 |
| LOC114274685 | 0.368981 | 0.249283 | 0.216222 | 1.565066 | 1.866024 | 0.946639 | -2.45236 | 0.133607 | 76.9296  | 2.45E-13 | 1.52E-12 |
| LOC114274673 | 9.429527 | 11.07926 | 9.00923  | 0.745269 | 1.7604   | 0.845213 | 2.966609 | -0.12392 | 70.10166 | 7.39E-13 | 4.37E-12 |
| LOC114274715 | 4.490481 | 3.725674 | 4.522722 | 1.432086 | 1.014819 | 1.163964 | 1.731826 | 2.080832 | 155.9847 | 2.78E-21 | 3.32E-20 |
| LOC114274740 | 1.999705 | 1.533461 | 2.235042 | 15.51188 | 15.37178 | 13.3155  | -3.03486 | 3.899635 | 1326.283 | 3.32E-36 | 1.27E-34 |
| LOC114274826 | 1.31834  | 0.878551 | 0.916408 | 2.151965 | 2.15649  | 2.033795 | -1.11457 | 0.864967 | 35.07894 | 5.84E-08 | 2.19E-07 |
| LOC114274883 | 0.880155 | 0.660702 | 0.800687 | 0        | 0        | 0        | 9.001818 | 0.450828 | 214.388  | 3.3E-25  | 5.46E-24 |
| LOC114275120 | 5.212966 | 2.362232 | 3.911602 | 0        | 0        | 0        | 8.56008  | 0.047476 | 108.5219 | 3.08E-10 | 1.45E-09 |
| LOC114275138 | 3.87285  | 2.562938 | 3.546051 | 0        | 0        | 0        | 9.250874 | 0.676697 | 246.207  | 4.36E-26 | 7.69E-25 |
| LOC114275194 | 1.876015 | 1.749322 | 1.916324 | 0.772637 | 0.482483 | 0.604311 | 1.492634 | 1.389629 | 78.17585 | 7.92E-14 | 5.1E-13  |
| LOC114275248 | 4.717029 | 3.374278 | 3.841367 | 1.00879  | 1.032574 | 1.44916  | 1.650124 | 0.583906 | 51.3243  | 2.16E-10 | 1.03E-09 |
| LOC114275315 | 3.181797 | 2.763125 | 3.358876 | 7.825329 | 8.274732 | 8.803286 | -1.52858 | 3.071497 | 295.8804 | 4.65E-30 | 1.11E-28 |
| LOC114275316 | 1.828488 | 2.305939 | 2.009036 | 6.115912 | 6.385724 | 6.332946 | -1.72457 | 0.818136 | 78.35385 | 7.55E-14 | 4.87E-13 |
| LOC114275432 | 1.913866 | 1.293005 | 1.653271 | 0.623833 | 0.717886 | 0.616787 | 1.206629 | 1.422968 | 53.00138 | 1.26E-10 | 6.15E-10 |
| LOC114275470 | 0.320807 | 0.268821 | 0.393471 | 0.027124 | 0.032035 | 0.020508 | 3.472478 | -0.27211 | 74.56186 | 2.12E-13 | 1.32E-12 |
| LOC114275469 | 1.264808 | 1.499127 | 1.414078 | 0.24202  | 0.317598 | 0.243979 | 2.246026 | 0.304081 | 68.79662 | 1.07E-12 | 6.25E-12 |
| LOC114275472 | 14.01123 | 13.46271 | 12.52104 | 3.565788 | 3.609748 | 3.260858 | 1.8362   | 3.748751 | 616.2393 | 8.43E-42 | 4.88E-40 |
| LOC114275493 | 0.030346 | 0.034169 | 0.100027 | 1.268759 | 1.737354 | 2.085371 | -4.98024 | -0.14978 | 152.3186 | 5.47E-21 | 6.35E-20 |
| LOC114275517 | 9.176877 | 10.10146 | 9.506522 | 3.160589 | 3.018645 | 3.011776 | 1.543122 | 4.198389 | 568.6038 | 1.91E-40 | 9.91E-39 |
| LOC114275532 | 4.263192 | 4.940843 | 4.844093 | 0.075607 | 0.238122 | 0.257239 | 4.421503 | 1.851717 | 443.3622 | 2.38E-36 | 9.19E-35 |
| LOC114275742 | 2.82584  | 3.508999 | 3.220938 | 1.536261 | 1.2096   | 1.4519   | 1.083545 | 1.43132  | 45.20928 | 1.63E-09 | 7.15E-09 |

|              |          |          |          |          |          |          |          |          |          |          |          |
|--------------|----------|----------|----------|----------|----------|----------|----------|----------|----------|----------|----------|
| LOC114276093 | 3.8829   | 2.832652 | 4.686925 | 1.690044 | 1.878612 | 0.90197  | 1.264328 | 0.632082 | 30.71777 | 3.88E-07 | 1.33E-06 |
| LOC114276096 | 8.918011 | 6.342101 | 7.271585 | 4.010176 | 2.955937 | 3.419033 | 1.032071 | 1.845552 | 51.78218 | 2.07E-10 | 9.88E-10 |
| LOC114276215 | 0.417073 | 0.313082 | 0.400973 | 0.821344 | 0.522333 | 0.883721 | -1.06447 | 0.033873 | 17.39586 | 7.03E-05 | 0.000181 |
| LOC114276232 | 1.316003 | 1.414462 | 1.544535 | 2.881585 | 3.274869 | 3.000822 | -1.21042 | 2.200345 | 100.8492 | 2.59E-16 | 2.05E-15 |
| LOC114276279 | 0.554982 | 0.277737 | 0.383937 | 2.466099 | 2.147664 | 2.373055 | -2.59389 | 1.030433 | 170.261  | 2.2E-22  | 2.87E-21 |
| LOC114276329 | 3.950466 | 4.880081 | 4.410777 | 0.02324  | 0        | 0        | 8.931181 | 2.389518 | 836.7997 | 2.14E-46 | 1.69E-44 |
| LOC114276391 | 1.627648 | 1.832728 | 2.465044 | 0.079967 | 0        | 0.060461 | 5.164543 | -0.30824 | 96.56542 | 7.22E-16 | 5.51E-15 |
| LOC114276413 | 0.711115 | 0.950847 | 1.025498 | 4.968737 | 4.007637 | 5.161661 | -2.50201 | 1.952942 | 292.5553 | 6.85E-30 | 1.61E-28 |
| LOC114276430 | 0.992159 | 0.913361 | 1.112224 | 1.96199  | 2.168484 | 1.73217  | -1.06153 | 2.756755 | 110.2455 | 3.04E-17 | 2.59E-16 |
| LOC114276477 | 0.04872  | 0.137147 | 0.026765 | 1.284189 | 1.290059 | 1.17182  | -4.19081 | -0.25127 | 122.8732 | 1.87E-18 | 1.77E-17 |
| LOC114276494 | 0.218452 | 0.17363  | 0.183546 | 0.840931 | 1.011573 | 1.112654 | -2.46685 | 0.512378 | 113.4382 | 1.45E-17 | 1.27E-16 |
| LOC114276500 | 7.207326 | 7.265245 | 8.522342 | 0.748665 | 2.357894 | 1.886809 | 2.031062 | 1.105221 | 98.4542  | 1.11E-15 | 8.35E-15 |
| LOC114276485 | 0        | 0        | 0        | 1.345604 | 1.147774 | 1.568446 | -8.19773 | -0.54607 | 143.8235 | 3.89E-20 | 4.21E-19 |
| LOC114276556 | 0.115655 | 0.047356 | 0.080866 | 0.917415 | 0.887878 | 0.809234 | -3.47215 | 0.475811 | 173.0013 | 1.37E-22 | 1.83E-21 |
| LOC114276575 | 0        | 0        | 0        | 2.973625 | 2.752092 | 2.800474 | -9.36104 | 0.593042 | 340.703  | 7.52E-32 | 2.04E-30 |
| LOC114276611 | 0.382367 | 0.380867 | 0.307013 | 1.176282 | 1.410296 | 1.637214 | -2.09398 | 0.89452  | 112.7563 | 1.68E-17 | 1.47E-16 |
| LOC114276759 | 3.579799 | 3.58034  | 3.586221 | 0.38279  | 0.482234 | 0.434124 | 2.921285 | 1.567724 | 253.9648 | 8.05E-28 | 1.61E-26 |
| LOC114276807 | 2.658837 | 2.138461 | 3.199602 | 8.055485 | 9.604537 | 9.22277  | -1.8552  | 0.516647 | 71.13321 | 5.52E-13 | 3.31E-12 |
| LOC114276862 | 0.195926 | 0.441225 | 0.172218 | 1.994492 | 1.738653 | 1.130981 | -2.6556  | -0.40358 | 59.76108 | 1.63E-11 | 8.58E-11 |
| LOC114276873 | 0.175399 | 0.098749 | 0.057815 | 2.42321  | 1.933059 | 2.02497  | -4.29624 | 0.959767 | 296.3012 | 4.43E-30 | 1.06E-28 |
| LOC114276912 | 1.555649 | 1.492152 | 1.456033 | 16.23419 | 19.87435 | 17.65898 | -3.68021 | 2.377767 | 664.9033 | 4.3E-43  | 2.69E-41 |
| LOC114276913 | 0.541662 | 0.481508 | 0.344558 | 1.191937 | 0.979296 | 1.214645 | -1.39283 | -0.17234 | 25.42049 | 2.4E-06  | 7.51E-06 |
| LOC114277093 | 0.510978 | 0.655271 | 0.483456 | 1.780327 | 1.869026 | 1.677687 | -1.79639 | 1.335168 | 117.9265 | 5.4E-18  | 4.92E-17 |
| LOC114277232 | 1.200006 | 0.97587  | 1.611496 | 2.908529 | 2.385498 | 2.565559 | -1.1409  | -0.10661 | 18.2243  | 4.89E-05 | 0.000129 |
| LOC114277274 | 0.23596  | 0.281319 | 0.358388 | 0        | 0        | 0        | 8.020239 | -0.41526 | 104.327  | 1.46E-16 | 1.18E-15 |
| LOC114277354 | 0.493587 | 0.666933 | 0.705022 | 1.749644 | 1.342287 | 1.526368 | -1.40398 | 0.447581 | 40.3745  | 8.67E-09 | 3.54E-08 |

|              |          |          |          |          |          |          |          |          |          |          |          |
|--------------|----------|----------|----------|----------|----------|----------|----------|----------|----------|----------|----------|
| LOC114277490 | 2.099653 | 1.818619 | 1.985859 | 0.587199 | 0.616455 | 0.718798 | 1.503519 | 2.368292 | 152.2999 | 5.49E-21 | 6.37E-20 |
| LOC114277525 | 0.500786 | 0.583328 | 0.626129 | 0.156955 | 0.123581 | 0.142403 | 1.897105 | -0.47532 | 28.9413  | 5.96E-07 | 2E-06    |
| LOC114277560 | 4.167872 | 3.96522  | 4.45697  | 0        | 0        | 0        | 10.18579 | 1.552179 | 506.335  | 4.7E-38  | 2.06E-36 |
| LOC114277609 | 0.053112 | 0.093978 | 0.091703 | 0.151719 | 0.217197 | 0.192921 | -1.36846 | 0.156929 | 30.37829 | 3.42E-07 | 1.18E-06 |
| LOC114277655 | 2.581452 | 2.794913 | 3.109075 | 0.541456 | 0.426324 | 0.818757 | 2.108158 | 0.19538  | 56.93846 | 3.66E-11 | 1.86E-10 |
| LOC114277638 | 6.086368 | 5.744625 | 5.654741 | 0.027117 | 0        | 0.020503 | 8.288831 | 2.563157 | 997.5705 | 3.58E-50 | 3.74E-48 |
| LOC114277671 | 7.269087 | 6.711227 | 6.515588 | 0.40264  | 0.172923 | 0.359773 | 4.370957 | 3.399795 | 1359.78  | 5.94E-51 | 6.84E-49 |
| LOC114277727 | 2.381014 | 1.450386 | 2.744781 | 0.354775 | 0.223471 | 0.107294 | 3.199511 | 0.065511 | 81.99935 | 6.4E-14  | 4.16E-13 |
| LOC114277740 | 1.01672  | 1.026395 | 0.924507 | 2.294337 | 2.308285 | 2.216534 | -1.30175 | 1.519089 | 76.50445 | 1.25E-13 | 7.91E-13 |
| LOC114277812 | 1.070778 | 0.954508 | 1.098075 | 0.210869 | 0.166031 | 0.257544 | 2.183615 | 1.146547 | 123.1002 | 1.78E-18 | 1.69E-17 |
| LOC114277814 | 8.66584  | 8.648885 | 6.708343 | 2.685162 | 2.114206 | 2.300859 | 1.663403 | 0.753522 | 59.27631 | 1.78E-11 | 9.35E-11 |
| LOC114277827 | 0.042322 | 0.035741 | 0.023251 | 1.250184 | 1.468958 | 1.526904 | -5.42601 | 1.070801 | 399.7961 | 1.07E-34 | 3.62E-33 |
| LOC114277863 | 0        | 0.020526 | 0.040059 | 5.699755 | 5.270551 | 6.088298 | -8.08858 | 2.268654 | 1017.143 | 1.61E-50 | 1.76E-48 |
| LOC114277898 | 3.716654 | 3.798642 | 4.397769 | 0        | 0        | 0.157174 | 5.796783 | 0.240956 | 159.6924 | 1.42E-21 | 1.74E-20 |
| LOC114277971 | 1.902297 | 1.521118 | 1.938674 | 0.050116 | 0        | 0.037892 | 5.702695 | 0.156176 | 151.111  | 6.85E-21 | 7.88E-20 |
| LOC114278001 | 0.826767 | 0.489967 | 0.776924 | 1.680892 | 1.370189 | 1.435337 | -1.18254 | 1.630906 | 62.53187 | 8.81E-12 | 4.75E-11 |
| LOC114278049 | 11.07793 | 11.77128 | 12.00562 | 4.467408 | 3.815121 | 3.793386 | 1.432842 | 3.6322   | 371.2032 | 1.59E-33 | 4.84E-32 |
| LOC114278121 | 0.732349 | 0.864849 | 1.099051 | 0.03247  | 0.025566 | 0        | 5.327636 | -0.1667  | 109.9089 | 3.19E-17 | 2.72E-16 |
| LOC114278132 | 1.638856 | 1.779443 | 2.025764 | 0.656122 | 0.865668 | 0.804444 | 1.101672 | 2.025752 | 67.83913 | 1.41E-12 | 8.14E-12 |
| LOC114278306 | 0.525546 | 0.495602 | 0.541349 | 0.023884 | 0.018805 | 0        | 5.085657 | 0.429626 | 174.3412 | 1.09E-22 | 1.47E-21 |
| LOC114278393 | 2.765058 | 3.304068 | 3.348093 | 1.743847 | 1.049977 | 1.085799 | 1.202768 | 0.34738  | 24.73062 | 3.18E-06 | 9.79E-06 |
| LOC114278410 | 0.457956 | 0.36669  | 0.514357 | 1.035977 | 0.75743  | 0.937128 | -1.116   | 1.042459 | 39.46733 | 1.19E-08 | 4.81E-08 |
| LOC114278471 | 1.997485 | 2.249164 | 2.320133 | 0.103745 | 0        | 0        | 5.764943 | -0.51276 | 88.38484 | 5.49E-15 | 3.92E-14 |
| LOC114278476 | 10.07695 | 8.715522 | 9.627796 | 2.74329  | 3.2748   | 3.880608 | 1.397007 | 2.009154 | 104.9635 | 9.88E-17 | 8.1E-16  |
| LOC114278535 | 0        | 0        | 0        | 10.02235 | 9.360665 | 9.249888 | -11.7017 | 2.95647  | 1786.177 | 8.09E-60 | 1.85E-57 |
| LOC114278582 | 0.033801 | 0.095149 | 0        | 1.566821 | 1.161094 | 0.998802 | -4.86727 | 0.207577 | 176.6183 | 1.34E-21 | 1.64E-20 |

|              |          |          |          |          |          |          |          |          |          |          |          |
|--------------|----------|----------|----------|----------|----------|----------|----------|----------|----------|----------|----------|
| LOC114278629 | 0.726942 | 0.993936 | 0.74167  | 4.593616 | 3.691178 | 4.258109 | -2.44951 | 2.148365 | 321.8436 | 2.52E-31 | 6.58E-30 |
| LOC114278650 | 0.507674 | 0.542574 | 0.614529 | 0.09385  | 0.110842 | 0.118262 | 2.228258 | 0.341766 | 70.29053 | 7E-13    | 4.16E-12 |
| LOC114278676 | 0.186297 | 0        | 0.307038 | 10.32895 | 11.33241 | 9.281672 | -5.99573 | 1.788091 | 606.1533 | 6.55E-37 | 2.63E-35 |
| LOC114278843 | 1.149422 | 0.699593 | 1.228785 | 0.225886 | 0.044464 | 0.512356 | 1.825868 | -0.46128 | 23.31506 | 9.19E-06 | 2.67E-05 |
| LOC114278881 | 0.147713 | 0.304929 | 0.189348 | 5.101807 | 5.250279 | 5.718311 | -4.74871 | 1.79743  | 587.7097 | 5.32E-41 | 2.86E-39 |
| LOC114278935 | 1.359405 | 0.892901 | 0.995757 | 1.956332 | 2.26999  | 2.80255  | -1.21965 | -0.0442  | 21.69    | 1.11E-05 | 3.2E-05  |
| LOC114278970 | 1.90938  | 1.329065 | 1.411325 | 3.281589 | 3.378833 | 3.005961 | -1.14566 | 1.089905 | 43.25278 | 3.19E-09 | 1.36E-08 |
| LOC114279186 | 0.226994 | 0.159747 | 0.405288 | 0.618953 | 0.812237 | 0.604463 | -1.4686  | 0.072556 | 31.34971 | 2.53E-07 | 8.84E-07 |
| LOC114279266 | 1.325088 | 1.10522  | 1.348083 | 2.587202 | 2.177564 | 2.49572  | -1.03391 | 0.242955 | 19.93728 | 2.34E-05 | 6.43E-05 |
| LOC114279388 | 3.264907 | 2.576408 | 2.940402 | 6.762029 | 7.10531  | 7.319428 | -1.37448 | 3.515019 | 340.5746 | 3.44E-32 | 9.61E-31 |
| LOC114279353 | 0.527116 | 0.758402 | 0.611341 | 2.342275 | 1.928057 | 2.53564  | -1.94893 | 0.616953 | 81.96127 | 2.89E-14 | 1.94E-13 |
| LOC114279469 | 1.731124 | 2.070229 | 1.482293 | 4.449028 | 4.18653  | 3.560679 | -1.30484 | 2.901824 | 164.5206 | 2.28E-19 | 2.33E-18 |
| LOC114279484 | 0.344252 | 0.310101 | 0.151297 | 0.834384 | 0.591269 | 0.946279 | -1.63752 | -0.42721 | 27.16719 | 1.2E-06  | 3.87E-06 |
| LOC114279485 | 1.114632 | 0.952124 | 1.182461 | 2.864629 | 2.090475 | 3.275202 | -1.43798 | 0.630528 | 47.54396 | 7.47E-10 | 3.38E-09 |
| LOC114279504 | 4.114033 | 3.210167 | 3.647929 | 0.918422 | 1.497921 | 1.587179 | 1.31581  | 1.125004 | 50.85878 | 2.51E-10 | 1.19E-09 |
| LOC114279847 | 3.257674 | 2.017474 | 2.863474 | 10.26458 | 7.848848 | 8.208469 | -1.7706  | 1.697225 | 137.9065 | 1.22E-19 | 1.28E-18 |
| LOC114279881 | 0.507155 | 0.504433 | 0.622243 | 0        | 0        | 0        | 8.638927 | 0.127896 | 166.5293 | 6.38E-22 | 8.03E-21 |
| LOC114279865 | 4.302255 | 3.708005 | 4.921596 | 9.848328 | 8.337078 | 8.954694 | -1.16686 | 3.526817 | 235.736  | 2.54E-25 | 4.25E-24 |
| LOC114279866 | 8.191216 | 7.168361 | 8.720237 | 17.82191 | 16.34073 | 17.35366 | -1.19964 | 4.181371 | 370.87   | 1.64E-33 | 4.99E-32 |
| LOC114280001 | 0.185095 | 0        | 0.122023 | 5.181637 | 4.556712 | 5.698442 | -5.63274 | 1.115395 | 391.8246 | 7.43E-34 | 2.33E-32 |
| LOC114280005 | 1.172509 | 1.386255 | 1.996842 | 4.262825 | 3.020765 | 2.49782  | -1.17782 | 0.345182 | 25.23603 | 2.68E-06 | 8.32E-06 |
| LOC114280127 | 3.670484 | 2.933066 | 3.837773 | 0.107617 | 0.084734 | 0.081366 | 5.04041  | 0.041549 | 131.4969 | 3.12E-19 | 3.15E-18 |
| LOC114280170 | 1.852022 | 1.692832 | 1.496246 | 0.514899 | 0.608121 | 0.763626 | 1.291856 | 1.712588 | 74.10712 | 2.41E-13 | 1.49E-12 |
| LOC114280251 | 0.238776 | 0.053772 | 0.209882 | 1.909827 | 1.435382 | 1.969039 | -3.41821 | -0.6359  | 73.92258 | 2.53E-13 | 1.56E-12 |
| LOC114280252 | 0.313564 | 0.211843 | 0.13781  | 1.311007 | 0.942483 | 1.93933  | -2.73224 | -0.29311 | 67.75397 | 1.8E-12  | 1.03E-11 |
| LOC114280275 | 0.185801 | 0.133134 | 0.334059 | 0.583391 | 0.41099  | 0.766093 | -1.5333  | -0.38129 | 24.21616 | 4.05E-06 | 1.23E-05 |

|              |          |          |          |          |          |          |          |          |          |          |          |
|--------------|----------|----------|----------|----------|----------|----------|----------|----------|----------|----------|----------|
| LOC114280352 | 0.516595 | 0.581685 | 0.690109 | 9.032715 | 8.681283 | 8.836796 | -4.00011 | 5.302613 | 5283.276 | 1.49E-61 | 3.8E-59  |
| LOC114280369 | 0.308008 | 0.520225 | 0.300819 | 0.96428  | 0.979666 | 1.058317 | -1.52586 | 0.334854 | 42.69022 | 3.87E-09 | 1.63E-08 |
| LOC114280383 | 1.465953 | 1.406118 | 1.600762 | 0        | 0        | 0        | 9.993086 | 1.370869 | 441.7895 | 7.15E-36 | 2.65E-34 |
| LOC114280420 | 0.972048 | 0.985072 | 0.534015 | 0        | 0.034782 | 0.066799 | 4.26298  | -0.62092 | 63.7328  | 5.17E-12 | 2.84E-11 |
| LOC114280462 | 3.42426  | 3.183432 | 3.415081 | 0.542666 | 0.552946 | 0.410293 | 2.635216 | 1.756186 | 249.0766 | 1.53E-27 | 2.99E-26 |
| LOC114280498 | 0.7774   | 0.7503   | 0.65079  | 0        | 0        | 0        | 7.92999  | -0.49689 | 100.1709 | 3.84E-16 | 3E-15    |
| LOC114280588 | 21.19684 | 20.12529 | 20.85537 | 48.86994 | 44.4688  | 47.60748 | -1.28444 | 5.393896 | 963.0229 | 1.51E-49 | 1.52E-47 |
| LOC114280591 | 2.486873 | 2.204423 | 2.616157 | 0.577109 | 0.605862 | 0.599961 | 1.92375  | 1.818963 | 162.8888 | 8.01E-22 | 1E-20    |
| LOC114280603 | 2.371061 | 2.061499 | 2.374345 | 0.109118 | 0.107395 | 0.226878 | 3.778484 | 1.338586 | 276.6032 | 4.62E-29 | 1.02E-27 |
| LOC114280622 | 1.110689 | 0.924382 | 0.63671  | 3.072445 | 2.350022 | 3.451288 | -1.81735 | 0.314596 | 57.2476  | 3.32E-11 | 1.7E-10  |
| LOC114280725 | 1.967744 | 1.940526 | 2.091387 | 0.023379 | 0.128856 | 0.106058 | 4.322463 | 1.349291 | 310.8397 | 8.47E-31 | 2.14E-29 |
| LOC114280844 | 0.656503 | 0.532239 | 0.533782 | 1.432086 | 1.108784 | 1.245171 | -1.22    | 1.110035 | 49.75412 | 3.6E-10  | 1.69E-09 |
| LOC114280897 | 3.766686 | 3.908631 | 5.437004 | 1.074065 | 1.797075 | 1.116593 | 1.582292 | 0.337024 | 38.65102 | 1.6E-08  | 6.36E-08 |
| LOC114280902 | 2.652835 | 3.101975 | 2.914781 | 0.989206 | 0.778868 | 1.262096 | 1.396092 | 0.865783 | 47.75241 | 6.97E-10 | 3.16E-09 |
| LOC114281071 | 0.558545 | 0.911934 | 0.690408 | 0.101533 | 0.039972 | 0.057575 | 3.342193 | -0.06029 | 80.70005 | 4.03E-14 | 2.67E-13 |
| LOC114281122 | 0.99861  | 0.986344 | 0.789224 | 5.286646 | 5.040169 | 4.815751 | -2.54419 | 2.389076 | 411.6481 | 3.69E-35 | 1.29E-33 |
| LOC114281124 | 0.581353 | 0.327301 | 0.638757 | 4.931718 | 4.853837 | 3.462386 | -3.14072 | -0.33161 | 83.94279 | 1.72E-14 | 1.17E-13 |
| LOC114281237 | 13.9322  | 11.19085 | 12.46571 | 1.897407 | 1.883681 | 1.933553 | 2.609937 | 2.275473 | 339.5738 | 3.81E-32 | 1.06E-30 |
| LOC114281260 | 1.414718 | 1.632793 | 0.971506 | 3.728971 | 4.606587 | 5.006799 | -1.84796 | 1.337679 | 118.4172 | 5.97E-18 | 5.42E-17 |
| LOC114281396 | 8.144186 | 7.906316 | 8.101891 | 3.441087 | 2.740901 | 2.510945 | 1.387793 | 2.908339 | 193.655  | 4.6E-24  | 6.92E-23 |
| LOC114281415 | 0        | 0        | 0        | 1.586653 | 0.654383 | 1.542369 | -7.64172 | -1.05065 | 89.43248 | 1.51E-14 | 1.04E-13 |
| LOC114281469 | 1.406229 | 1.502625 | 1.403188 | 0.417351 | 0.61614  | 0.394433 | 1.474129 | 1.0735   | 60.74761 | 1.14E-11 | 6.09E-11 |
| LOC114281665 | 4.425736 | 4.188919 | 4.524463 | 2.122067 | 1.964619 | 2.027577 | 1.001513 | 2.91936  | 113.0237 | 1.59E-17 | 1.39E-16 |
| LOC114281724 | 2.249629 | 2.247294 | 2.028112 | 0        | 0        | 0.015856 | 8.062695 | 1.558086 | 489.9824 | 5.61E-38 | 2.45E-36 |
| LOC114281771 | 1.38928  | 1.032455 | 1.083787 | 0.454583 | 0.497116 | 0.515545 | 1.146776 | 0.919577 | 35.01626 | 5.97E-08 | 2.24E-07 |
| LOC114281785 | 0.995401 | 1.120819 | 1.173229 | 0.427691 | 0.310845 | 0.472609 | 1.329038 | 0.426272 | 32.00646 | 1.84E-07 | 6.52E-07 |



|              |          |          |          |          |          |          |          |          |          |          |          |
|--------------|----------|----------|----------|----------|----------|----------|----------|----------|----------|----------|----------|
| LOC114281818 | 2.498273 | 2.309479 | 2.338296 | 5.130116 | 4.414515 | 5.129243 | -1.13772 | 2.850799 | 142.8076 | 3.32E-20 | 3.61E-19 |
| LOC114281833 | 2.674715 | 2.81831  | 2.857936 | 0.758318 | 0.913172 | 1.07923  | 1.470771 | 1.242064 | 69.88677 | 7.85E-13 | 4.64E-12 |
| LOC114281846 | 5.355874 | 5.307018 | 5.237403 | 2.081075 | 2.242252 | 2.263542 | 1.161103 | 4.06731  | 330.1768 | 1.03E-31 | 2.76E-30 |
| LOC114281877 | 1.545871 | 1.592156 | 1.545566 | 0.266362 | 0.230697 | 0.16111  | 2.746098 | 1.900944 | 283.9886 | 1.89E-29 | 4.32E-28 |
| LOC114281944 | 0.267797 | 0.244102 | 0.210171 | 0.625894 | 0.547564 | 0.718592 | -1.48609 | 0.109377 | 35.66238 | 4.71E-08 | 1.79E-07 |
| LOC114281966 | 0.40776  | 0.336701 | 0.343485 | 1.161269 | 0.66144  | 0.971405 | -1.43219 | 0.561006 | 43.85472 | 2.59E-09 | 1.11E-08 |
| LOC114281977 | 1.699257 | 1.360611 | 1.265441 | 0.171608 | 0.108095 | 0.051899 | 3.642798 | 0.438466 | 133.3184 | 2.16E-19 | 2.21E-18 |
| LOC114282055 | 0.445055 | 0.513354 | 0.608269 | 0.197325 | 0.124293 | 0.074596 | 1.920492 | 0.008625 | 41.1821  | 6.53E-09 | 2.7E-08  |
| LOC114282056 | 0.755085 | 0.960438 | 0.983281 | 0.305024 | 0.26018  | 0.288275 | 1.548777 | 0.457142 | 42.40448 | 4.27E-09 | 1.79E-08 |
| LOC114282191 | 0.146572 | 0.135915 | 0.189464 | 0.329134 | 0.382553 | 0.272548 | -1.15748 | -0.14887 | 18.12072 | 5.12E-05 | 0.000135 |
| LOC114282195 | 1.98554  | 1.709663 | 2.352701 | 1.132347 | 0.501509 | 0.96315  | 1.139039 | 0.268409 | 20.6131  | 1.75E-05 | 4.91E-05 |
| LOC114282235 | 0.688364 | 0.616913 | 0.679157 | 0.025537 | 0.060321 | 0.077232 | 3.389375 | -0.17936 | 79.44318 | 5.64E-14 | 3.69E-13 |
| LOC114282317 | 2.383912 | 1.742427 | 2.067872 | 0        | 0        | 0        | 9.261755 | 0.687525 | 255.8546 | 1.18E-27 | 2.32E-26 |
| LOC114282450 | 1.645069 | 1.617126 | 1.577982 | 6.787828 | 8.147572 | 6.818836 | -2.27454 | 2.384706 | 340.4171 | 3.49E-32 | 9.73E-31 |
| LOC114282571 | 0.199383 | 0.164637 | 0.160652 | 0.434932 | 0.532702 | 0.730754 | -1.80883 | -0.16465 | 40.63719 | 7.91E-09 | 3.24E-08 |
| LOC114282606 | 2.855214 | 3.709574 | 3.23367  | 0.798503 | 1.194557 | 1.388565 | 1.384333 | 0.683678 | 40.62851 | 7.93E-09 | 3.25E-08 |
| LOC114282615 | 2.532226 | 2.669836 | 2.478743 | 0.167387 | 0.197692 | 0.411307 | 3.135129 | 0.967692 | 171.5886 | 1.75E-22 | 2.31E-21 |
| LOC114282641 | 1.291978 | 1.283616 | 1.085538 | 2.693966 | 3.372066 | 4.073652 | -1.5903  | 0.912549 | 70.03782 | 7.52E-13 | 4.45E-12 |
| LOC114282715 | 1.328466 | 1.203976 | 1.388439 | 0.176701 | 0        | 0.044533 | 4.113825 | -0.40792 | 75.67845 | 1.56E-13 | 9.82E-13 |
| LOC114282788 | 0.85205  | 0.702005 | 0.776347 | 0.075555 | 0.208213 | 0.199937 | 2.086749 | -0.34517 | 36.71295 | 3.21E-08 | 1.24E-07 |
| LOC114282820 | 0.453059 | 0.351432 | 0.51992  | 0.786978 | 0.821383 | 1.07932  | -1.13532 | 1.044522 | 40.53838 | 8.19E-09 | 3.35E-08 |
| LOC114282827 | 0.581728 | 0.229258 | 0.383501 | 1.427594 | 1.332195 | 0.919455 | -1.67239 | -0.17794 | 33.30448 | 1.15E-07 | 4.17E-07 |
| LOC114282900 | 0.369975 | 0.317925 | 0.449297 | 0.035397 | 0.027871 | 0.080288 | 2.802862 | -0.37676 | 53.01344 | 1.26E-10 | 6.12E-10 |
| LOC114283211 | 0        | 0.036523 | 0.035639 | 2.771295 | 2.83199  | 2.719422 | -6.71651 | 0.398234 | 274.3331 | 6.11E-29 | 1.34E-27 |
| LOC114283222 | 0.707834 | 0.626229 | 0.624959 | 0.206794 | 0.253279 | 0.138978 | 1.607581 | 0.159209 | 36.00647 | 4.15E-08 | 1.58E-07 |
| LOC114283259 | 1.585973 | 1.233827 | 0.855446 | 3.878967 | 2.889078 | 2.893137 | -1.46504 | 1.245171 | 69.96485 | 1.64E-12 | 9.42E-12 |

|              |          |          |          |          |          |          |          |          |          |          |          |
|--------------|----------|----------|----------|----------|----------|----------|----------|----------|----------|----------|----------|
| LOC114283258 | 3.92978  | 4.354964 | 3.99355  | 0        | 0.088927 | 0.106741 | 5.702791 | 2.035341 | 575.6935 | 4.6E-40  | 2.32E-38 |
| LOC114283357 | 23.12319 | 20.28042 | 22.98901 | 9.959509 | 9.879412 | 9.872117 | 1.054935 | 4.472778 | 325.2434 | 1.74E-31 | 4.6E-30  |
| LOC114283447 | 0.565811 | 0.56429  | 0.426295 | 0.205709 | 0.023138 | 0.15553  | 1.955067 | -0.51293 | 27.17559 | 1.23E-06 | 3.99E-06 |
| LOC114283471 | 2.51973  | 2.976745 | 2.768532 | 0        | 0        | 0        | 9.685841 | 1.086214 | 351.6141 | 2.5E-32  | 7.04E-31 |
| LOC114283453 | 2.149194 | 1.613325 | 1.475881 | 4.395207 | 4.934614 | 4.123084 | -1.45343 | 1.105728 | 67.92637 | 1.37E-12 | 7.94E-12 |
| LOC114283532 | 5.699549 | 5.467978 | 5.546236 | 2.044276 | 2.341228 | 2.792645 | 1.097622 | 3.231579 | 167.3018 | 3.68E-22 | 4.72E-21 |
| LOC114283701 | 1.089572 | 0.670937 | 0.785635 | 0        | 0.048734 | 0        | 5.334026 | -0.17177 | 106.0074 | 1.17E-16 | 9.52E-16 |
| LOC114283738 | 0.440978 | 0.463437 | 0.710631 | 0.961943 | 1.094024 | 1.373781 | -1.21075 | -0.12168 | 19.9893  | 2.29E-05 | 6.3E-05  |
| LOC114283823 | 0.056909 | 0.09612  | 0.125057 | 17.79357 | 15.72059 | 17.4422  | -7.56811 | 3.21554  | 2105.994 | 8.73E-64 | 2.72E-61 |
| LOC114283968 | 1.776161 | 1.551688 | 1.716011 | 0.055668 | 0        | 0        | 6.287049 | -0.06374 | 132.4479 | 2.58E-19 | 2.62E-18 |
| LOC114283980 | 5.011807 | 5.220037 | 5.024847 | 0.341646 | 0.089667 | 0        | 5.117935 | 0.460738 | 176.0277 | 8.22E-23 | 1.12E-21 |
| LOC114284014 | 2.517117 | 2.186436 | 2.291548 | 5.033236 | 3.860066 | 5.090444 | -1.09388 | 1.580598 | 55.46729 | 5.79E-11 | 2.9E-10  |
| LOC114284029 | 1.659896 | 1.797153 | 1.739621 | 5.849102 | 4.769864 | 5.018992 | -1.68596 | 3.059327 | 340.4492 | 3.48E-32 | 9.72E-31 |
| LOC114284102 | 3.775113 | 3.795329 | 3.851597 | 0.980354 | 0.868385 | 1.297128 | 1.7331   | 0.248197 | 44.45117 | 2.11E-09 | 9.16E-09 |
| LOC114284141 | 1.040055 | 0.775458 | 0.911113 | 0.153295 | 0.140816 | 0.25112  | 2.186094 | 0.354247 | 67.40365 | 1.6E-12  | 9.18E-12 |
| LOC114284224 | 4.141383 | 4.707599 | 3.986938 | 0.143396 | 0.056453 | 0.027104 | 5.770134 | 1.769814 | 494.4389 | 3.98E-38 | 1.75E-36 |
| LOC114284429 | 1.350727 | 1.520915 | 1.079345 | 0.446433 | 0.632711 | 0.573808 | 1.12567  | 0.313384 | 21.49503 | 1.21E-05 | 3.45E-05 |
| LOC114284422 | 1.040262 | 0.8833   | 1.030555 | 0.403002 | 0.414944 | 0.468766 | 1.083692 | 0.425364 | 22.55947 | 7.75E-06 | 2.27E-05 |
| LOC114284446 | 2.969212 | 3.072246 | 2.931749 | 0        | 0.028715 | 0        | 7.723043 | 1.240667 | 386.8684 | 3.56E-34 | 1.15E-32 |
| LOC114284449 | 3.084171 | 2.778215 | 3.162793 | 0.041529 | 0        | 0        | 7.545294 | 1.074896 | 337.0766 | 4.95E-32 | 1.36E-30 |
| LOC114284483 | 0.680633 | 0.418032 | 0.815826 | 6.411306 | 5.667983 | 6.633277 | -3.3664  | 0.768662 | 207.0295 | 5.81E-25 | 9.37E-24 |
| LOC114284486 | 1.276419 | 1.634513 | 1.484952 | 0        | 0        | 0.034398 | 6.371646 | 0.0136   | 140.1698 | 5.54E-20 | 5.93E-19 |
| LOC114284487 | 1.896513 | 1.621375 | 1.659305 | 0        | 0        | 0        | 8.255364 | -0.21495 | 127.0979 | 1.05E-18 | 1.02E-17 |
| LOC114284607 | 0.510315 | 0.336359 | 0.28719  | 1.153921 | 0.926373 | 0.718484 | -1.36296 | 0.705042 | 42.39263 | 5.67E-09 | 2.36E-08 |
| LOC114284587 | 0        | 0        | 0        | 2.403133 | 2.393009 | 2.778844 | -8.76392 | -0.00294 | 219.4804 | 1.59E-25 | 2.7E-24  |
| LOC114284799 | 1.707365 | 1.281659 | 1.908864 | 0        | 0        | 0        | 8.403587 | -0.08465 | 137.9144 | 1.21E-19 | 1.26E-18 |

|              |          |          |          |          |          |          |          |          |          |          |          |
|--------------|----------|----------|----------|----------|----------|----------|----------|----------|----------|----------|----------|
| LOC114284839 | 1.1347   | 1.241679 | 1.123824 | 2.135312 | 2.413256 | 2.09768  | -1.03374 | 2.696417 | 103.8874 | 1.27E-16 | 1.03E-15 |
| LOC114284945 | 0.07993  | 0        | 0.105386 | 0.435894 | 0.640655 | 0.790958 | -3.39595 | -0.54216 | 72.35924 | 1.03E-12 | 6.02E-12 |
| LOC114285035 | 2.883393 | 2.14922  | 2.231059 | 0.812062 | 0.930023 | 1.060504 | 1.254778 | 0.425949 | 28.7726  | 6.37E-07 | 2.13E-06 |
| LOC114285036 | 6.962058 | 7.240845 | 7.649504 | 3.188097 | 2.814467 | 2.33738  | 1.297471 | 1.552557 | 69.06823 | 9.91E-13 | 5.8E-12  |
| LOC114285057 | 3.08003  | 3.325092 | 3.488822 | 0.288605 | 0.181791 | 0.218206 | 3.737503 | 0.836341 | 193.306  | 4.86E-24 | 7.3E-23  |
| LOC114285140 | 0.241261 | 0.353157 | 0.424133 | 1.798134 | 1.17407  | 1.757421 | -2.30936 | 0.296274 | 83.2429  | 2.06E-14 | 1.4E-13  |
| LOC114285192 | 1.249776 | 1.219612 | 1.037515 | 0.100972 | 0.159004 | 0.190855 | 2.783024 | -0.27411 | 58.57428 | 2.21E-11 | 1.15E-10 |
| LOC114285278 | 1.216349 | 1.059695 | 1.199881 | 0.112976 | 0.076246 | 0.09762  | 3.495846 | 1.159553 | 229.7813 | 2.12E-26 | 3.82E-25 |
| LOC114285326 | 0.017736 | 0        | 0        | 2.772718 | 2.513155 | 2.657025 | -8.27108 | 1.191275 | 506.1985 | 1.63E-38 | 7.38E-37 |
| LOC114285328 | 2.179811 | 1.929609 | 2.154038 | 0.099686 | 0.156978 | 0.207266 | 3.590045 | 1.359817 | 270.9681 | 9.25E-29 | 1.99E-27 |
| LOC114285351 | 5.019496 | 5.298695 | 5.297427 | 1.230613 | 1.819723 | 1.588538 | 1.623181 | 2.631693 | 203.6621 | 9.7E-25  | 1.53E-23 |
| LOC114285392 | 13.69963 | 12.02631 | 12.67402 | 24.54106 | 25.60068 | 24.5048  | -1.0634  | 4.336327 | 324.477  | 1.89E-31 | 4.98E-30 |
| LOC114285429 | 0.366557 | 0.512369 | 0.416639 | 1.654348 | 1.664405 | 1.963065 | -2.14272 | 1.4166   | 167.578  | 3.51E-22 | 4.5E-21  |
| LOC114285547 | 0.672386 | 0.478171 | 0.427714 | 1.929911 | 2.355298 | 2.407593 | -2.18437 | 1.265582 | 153.4266 | 4.45E-21 | 5.22E-20 |
| LOC114285751 | 0.733337 | 0.412868 | 0.512749 | 1.636048 | 1.908399 | 1.92417  | -1.81103 | 0.165584 | 52.31476 | 1.57E-10 | 7.59E-10 |
| LOC114285812 | 0.157602 | 0.070984 | 0.034633 | 4.240084 | 2.797121 | 4.722056 | -5.46694 | 0.95456  | 327.6517 | 3.95E-29 | 8.77E-28 |
| LOC114285874 | 5.580276 | 5.328304 | 6.082231 | 0.040576 | 0        | 0        | 8.489343 | 1.96357  | 650.075  | 1.04E-42 | 6.42E-41 |
| LOC114285939 | 0.712616 | 0.412665 | 0.738239 | 1.887596 | 1.049103 | 1.06337  | -1.15055 | 0.571268 | 26.33817 | 2.7E-06  | 8.37E-06 |
| LOC114285948 | 2.037155 | 2.186068 | 2.148174 | 0.124268 | 0.156551 | 0.131537 | 3.813445 | 1.374401 | 295.6415 | 4.78E-30 | 1.14E-28 |
| LOC114285978 | 1.208793 | 1.069435 | 0.917057 | 0.680138 | 0.288356 | 0.316451 | 1.273296 | -0.19891 | 17.59523 | 6.44E-05 | 0.000167 |
| LOC114285966 | 0.046646 | 0.052524 | 0        | 6.190005 | 6.676441 | 7.565053 | -7.49636 | 1.168296 | 485.5512 | 7.9E-38  | 3.4E-36  |
| LOC114286102 | 2.031471 | 2.033273 | 1.488041 | 0.102579 | 0        | 0        | 5.547056 | -0.69918 | 73.45873 | 2.88E-13 | 1.77E-12 |
| LOC114286117 | 8.755768 | 7.938396 | 6.746724 | 0        | 0.081377 | 0        | 7.609732 | 1.132639 | 344.1453 | 2.37E-32 | 6.69E-31 |
| LOC114286222 | 0.475479 | 0.635774 | 0.63671  | 0.216084 | 0.233939 | 0.22464  | 1.247118 | -0.1319  | 18.59723 | 4.16E-05 | 0.000111 |
| LOC114286330 | 2.540841 | 3.061753 | 2.742751 | 0        | 0        | 0.122531 | 5.640946 | 0.104461 | 141.0622 | 4.65E-20 | 5.01E-19 |
| LOC114286332 | 15.17436 | 14.90507 | 16.43621 | 0        | 0.30807  | 0.443737 | 5.64433  | 1.211222 | 334.5236 | 6.47E-32 | 1.77E-30 |

|              |          |          |          |          |          |          |          |          |          |          |          |
|--------------|----------|----------|----------|----------|----------|----------|----------|----------|----------|----------|----------|
| LOC114286403 | 1.117617 | 1.400899 | 0.857264 | 2.683283 | 2.806908 | 2.927195 | -1.42795 | 1.522498 | 85.68806 | 1.09E-14 | 7.58E-14 |
| LOC114286419 | 0.655076 | 0.401349 | 0.582158 | 1.36593  | 1.254735 | 1.363744 | -1.37316 | 1.581562 | 83.42407 | 1.97E-14 | 1.34E-13 |
| LOC114286406 | 0        | 0        | 0        | 5.868997 | 5.941351 | 4.437371 | -8.86447 | 0.103576 | 231.3013 | 3.03E-26 | 5.43E-25 |
| LOC114286437 | 1.020321 | 1.302063 | 1.868449 | 6.677143 | 5.354717 | 5.609317 | -2.16832 | 0.718995 | 102.9737 | 1.57E-16 | 1.27E-15 |
| LOC114286448 | 6.96449  | 7.686714 | 6.667243 | 2.005576 | 3.355637 | 2.937939 | 1.222617 | 1.171011 | 46.48715 | 1.06E-09 | 4.73E-09 |
| LOC114286515 | 0.399898 | 0.370822 | 0.258462 | 0.897989 | 1.111072 | 1.163901 | -1.72919 | -0.07763 | 40.55528 | 8.14E-09 | 3.33E-08 |
| LOC114286537 | 0.166859 | 0.243552 | 0.244447 | 0.05617  | 0.017691 | 0.025481 | 2.65032  | -0.48471 | 44.28063 | 2.24E-09 | 9.68E-09 |
| LOC114286582 | 0.232094 | 0.348449 | 0.510022 | 0.808651 | 1.079629 | 1.010133 | -1.5397  | 0.120879 | 36.44791 | 3.54E-08 | 1.36E-07 |
| LOC114286653 | 1.504125 | 1.463995 | 1.876732 | 0.417086 | 0.474355 | 1.086192 | 1.131504 | 0.528089 | 23.38821 | 6.55E-06 | 1.94E-05 |
| LOC114286801 | 3.226212 | 1.835079 | 2.813893 | 8.283102 | 6.474232 | 7.359701 | -1.57315 | 2.203279 | 141.8208 | 4.61E-18 | 4.22E-17 |
| LOC114286824 | 1.175017 | 1.195027 | 0.916222 | 0        | 0.027126 | 0.026047 | 5.536515 | 0.010135 | 132.3031 | 2.65E-19 | 2.69E-18 |
| LOC114286856 | 1.067122 | 0.972705 | 1.116658 | 2.494076 | 2.109215 | 2.44442  | -1.25145 | 0.08271  | 25.59871 | 2.24E-06 | 7.03E-06 |
| LOC114286897 | 0        | 0        | 0        | 0.389017 | 0.525084 | 0.61626  | -8.40942 | -0.35231 | 165.1463 | 8.1E-22  | 1.01E-20 |
| LOC114286889 | 0.169099 | 0.057122 | 0.111478 | 0.491828 | 0.580873 | 0.650748 | -2.41872 | -0.60456 | 47.00764 | 8.93E-10 | 4.01E-09 |
| LOC114286942 | 0.051378 | 0.028926 | 0.056452 | 1.914637 | 1.54429  | 1.871287 | -5.25207 | 0.11832  | 198.9917 | 1.99E-24 | 3.08E-23 |
| LOC114287027 | 0.43657  | 0.354393 | 0.479678 | 0        | 0.014532 | 0        | 5.892434 | -0.40856 | 97.16909 | 6.24E-16 | 4.79E-15 |
| LOC114286956 | 1.089162 | 0.974826 | 1.135338 | 0.1523   | 0.159888 | 0.191916 | 2.51966  | -0.37095 | 48.07536 | 6.26E-10 | 2.86E-09 |
| LOC114286957 | 1.097933 | 0.846576 | 0.865421 | 0.021694 | 0.085406 | 0.196826 | 2.989823 | 0.514804 | 106.7865 | 2.79E-16 | 2.2E-15  |
| LOC114287129 | 2.341048 | 2.590955 | 1.868697 | 0.872945 | 0.572773 | 0.440005 | 1.78616  | 1.183601 | 83.95921 | 3.53E-14 | 2.35E-13 |
| LOC114287188 | 2.794638 | 2.20425  | 2.284397 | 0.95713  | 0.946846 | 1.001987 | 1.221219 | 1.949876 | 79.00217 | 6.34E-14 | 4.13E-13 |
| LOC114287189 | 1.172933 | 1.075638 | 1.062887 | 0.373681 | 0.501912 | 0.398865 | 1.259536 | 0.999431 | 44.68729 | 1.95E-09 | 8.48E-09 |
| LOC114287275 | 0.582477 | 0.67773  | 0.735991 | 0.26471  | 0.097264 | 0.373593 | 1.322907 | 0.591565 | 30.69396 | 6.12E-07 | 2.05E-06 |
| LOC114287416 | 5.724176 | 5.176365 | 5.751697 | 1.105251 | 1.103716 | 0.957936 | 2.293649 | 2.748496 | 405.0559 | 6.66E-35 | 2.3E-33  |
| LOC114287424 | 3.738867 | 4.260075 | 4.597103 | 23.70716 | 23.18944 | 26.97816 | -2.66422 | 3.318522 | 906.8502 | 1.75E-48 | 1.6E-46  |
| LOC114287436 | 0.190317 | 0.250012 | 0.174257 | 1.383848 | 0.862596 | 1.133476 | -2.51821 | -0.58617 | 50.85947 | 2.51E-10 | 1.19E-09 |
| LOC114287464 | 1.475836 | 1.426161 | 1.185919 | 0.64067  | 0.472915 | 0.54494  | 1.211827 | 1.434972 | 55.28752 | 6.12E-11 | 3.06E-10 |

|              |          |          |          |          |          |          |          |          |          |          |          |
|--------------|----------|----------|----------|----------|----------|----------|----------|----------|----------|----------|----------|
| LOC114287490 | 2.108836 | 2.174282 | 1.535405 | 3.787301 | 4.691185 | 4.225355 | -1.23705 | 1.903104 | 82.75761 | 2.46E-14 | 1.66E-13 |
| LOC114287491 | 0.780155 | 0.686291 | 0.736647 | 1.817046 | 1.814523 | 2.161244 | -1.50151 | 1.749979 | 114.3665 | 1.18E-17 | 1.04E-16 |
| LOC114287527 | 1.942008 | 2.040917 | 2.596081 | 0        | 0        | 0        | 8.709618 | 0.192121 | 173.1083 | 2.08E-22 | 2.72E-21 |
| LOC114287686 | 1.889102 | 1.680948 | 1.873135 | 0.586301 | 0.659477 | 0.759917 | 1.32036  | 2.04602  | 98.47733 | 4.55E-16 | 3.55E-15 |
| LOC114287725 | 1.849196 | 1.32503  | 1.616196 | 3.590702 | 2.947504 | 2.714821 | -1.02699 | 0.790404 | 28.39954 | 7.37E-07 | 2.44E-06 |
| LOC114287733 | 2.460649 | 2.429678 | 2.038112 | 0.206447 | 0.16255  | 0.052029 | 3.945827 | 0.127121 | 115.0609 | 1.01E-17 | 8.99E-17 |
| LOC114287780 | 0.05299  | 0        | 0        | 6.774918 | 5.511312 | 6.19047  | -8.24246 | 2.428081 | 1056.309 | 7.54E-48 | 6.55E-46 |
| LOC114287856 | 2.223288 | 1.564636 | 1.657627 | 0.721704 | 0.340947 | 0.491092 | 1.744567 | -0.02171 | 34.93652 | 6.15E-08 | 2.3E-07  |
| LOC114287921 | 1.410357 | 1.510593 | 1.851983 | 0.062531 | 0        | 0.047278 | 5.209454 | -0.2705  | 102.0889 | 1.93E-16 | 1.55E-15 |
| LOC114288016 | 1.013715 | 0.902106 | 0.898234 | 0.089165 | 0.070206 | 0.224718 | 2.701245 | 0.132037 | 75.23599 | 1.76E-13 | 1.1E-12  |
| LOC114288027 | 2.170754 | 2.186973 | 2.604778 | 0.103843 | 0.163525 | 0.117769 | 4.005751 | 0.494834 | 158.1965 | 1.86E-21 | 2.25E-20 |
| LOC114288022 | 0.60267  | 0.747449 | 0.710162 | 0.31755  | 0.225025 | 0.288108 | 1.209994 | 0.809007 | 35.59383 | 4.83E-08 | 1.83E-07 |
| LOC114288295 | 0        | 0.098922 | 0        | 2.235808 | 1.571786 | 1.328193 | -5.55106 | -0.69953 | 103.5139 | 1.56E-16 | 1.26E-15 |
| LOC114288408 | 0.286207 | 0.153461 | 0.19467  | 0.520273 | 0.546194 | 0.543215 | -1.42522 | -0.18611 | 26.13679 | 1.8E-06  | 5.73E-06 |
| LOC114288416 | 2.276373 | 2.306872 | 2.407353 | 1.137961 | 0.855265 | 1.134134 | 1.058516 | 0.90618  | 30.58255 | 3.16E-07 | 1.09E-06 |
| LOC114288532 | 0.863062 | 1.042913 | 1.110184 | 2.927323 | 3.208749 | 3.211398 | -1.74628 | 2.587948 | 250.973  | 1.19E-27 | 2.34E-26 |
| LOC114288758 | 8.479628 | 6.871948 | 8.575436 | 2.880209 | 2.309775 | 2.540578 | 1.536025 | 2.449165 | 160.373  | 1.26E-21 | 1.54E-20 |
| LOC114288718 | 2.273126 | 1.345396 | 1.40889  | 0.052976 | 0.041712 | 0.080107 | 4.638186 | 0.02769  | 115.0996 | 1.33E-17 | 1.17E-16 |
| LOC114288774 | 2.896444 | 2.141515 | 2.799017 | 4.948036 | 5.519217 | 4.796232 | -1.06347 | 2.756085 | 109.6576 | 4.41E-17 | 3.71E-16 |
| LOC114288837 | 0.742509 | 0.557376 | 0.611869 | 0.168719 | 0.221406 | 0.148824 | 1.712522 | -0.15562 | 31.43748 | 2.28E-07 | 8E-07    |
| LOC114288879 | 2.491896 | 1.454895 | 1.926706 | 5.284793 | 3.830825 | 3.868825 | -1.21199 | 1.070575 | 44.80425 | 2.09E-09 | 9.07E-09 |
| LOC114288936 | 0.517313 | 0.476586 | 0.400459 | 0.170979 | 0.185106 | 0.274703 | 1.011664 | -0.05893 | 13.46352 | 0.000414 | 0.00095  |
| LOC114289029 | 1.121992 | 0.953966 | 1.031509 | 2.03958  | 1.966405 | 1.825301 | -1.00183 | 1.012687 | 32.62133 | 1.46E-07 | 5.23E-07 |
| LOC114289036 | 1.918775 | 1.718608 | 1.772837 | 0.554908 | 0.748998 | 0.659291 | 1.33498  | -0.07818 | 22.27413 | 8.72E-06 | 2.54E-05 |
| LOC114289062 | 3.44182  | 3.163659 | 4.32191  | 0        | 0.70375  | 0.09654  | 3.524963 | -0.06607 | 78.97857 | 3.49E-13 | 2.13E-12 |
| LOC114289096 | 11.45725 | 11.93065 | 10.46488 | 4.825821 | 4.732946 | 4.640836 | 1.14951  | 3.371815 | 209.7696 | 3.85E-25 | 6.32E-24 |

|              |          |          |          |          |          |          |          |          |          |          |          |
|--------------|----------|----------|----------|----------|----------|----------|----------|----------|----------|----------|----------|
| LOC114289116 | 103.0061 | 85.16355 | 94.57807 | 27.49777 | 29.55509 | 33.49537 | 1.52922  | 3.952508 | 467.0647 | 5.94E-35 | 2.05E-33 |
| LOC114289308 | 3.933576 | 4.025074 | 4.053832 | 1.644102 | 1.931492 | 1.736332 | 1.063857 | 2.610794 | 97.90908 | 5.22E-16 | 4.05E-15 |
| LOC114289318 | 0.021371 | 0        | 0.023482 | 1.010078 | 0.550593 | 0.763689 | -5.45135 | -0.79335 | 98.34493 | 4.7E-16  | 3.66E-15 |
| LOC114289332 | 4.594687 | 3.061051 | 3.113164 | 7.238678 | 8.110815 | 8.051544 | -1.21923 | 2.191618 | 93.66388 | 3.37E-15 | 2.45E-14 |
| LOC114289346 | 3.24182  | 3.163578 | 3.087    | 0.617367 | 0.64076  | 0.55164  | 2.285461 | 1.907292 | 226.7117 | 3.26E-26 | 5.82E-25 |
| LOC114289385 | 1.030371 | 1.225867 | 1.046669 | 6.078513 | 5.732091 | 5.557687 | -2.49663 | 2.445152 | 416.4098 | 2.42E-35 | 8.53E-34 |
| LOC114289461 | 0        | 0.01593  | 0        | 1.491588 | 1.741391 | 1.749949 | -7.93835 | 0.850633 | 392.9356 | 2.02E-34 | 6.66E-33 |
| LOC114289511 | 3.127289 | 3.52132  | 2.929993 | 0.30848  | 0.277585 | 0.199914 | 3.505667 | 1.171695 | 227.9813 | 2.73E-26 | 4.89E-25 |
| LOC114289546 | 2.669077 | 2.424626 | 2.450939 | 1.007884 | 1.199588 | 1.18735  | 1.036056 | 2.114621 | 66.58286 | 2.03E-12 | 1.15E-11 |
| LOC114289533 | 7.519944 | 6.773952 | 6.137839 | 1.855203 | 1.383844 | 1.919433 | 1.884422 | 1.313835 | 109.3556 | 3.61E-17 | 3.07E-16 |
| LOC114289637 | 1.181379 | 0.992989 | 1.078645 | 1.875313 | 2.262469 | 2.241146 | -1.08249 | 1.574124 | 55.15503 | 6.38E-11 | 3.18E-10 |
| LOC114289644 | 0.620475 | 0.668277 | 0.592819 | 1.618309 | 3.050362 | 3.077424 | -2.17699 | 0.888852 | 108.6628 | 2.93E-16 | 2.31E-15 |
| LOC114289672 | 0.610904 | 0.628061 | 0.919287 | 0.313841 | 0.304133 | 0.310297 | 1.103077 | 0.331936 | 20.74368 | 1.66E-05 | 4.66E-05 |
| LOC114289718 | 1.854369 | 1.931414 | 2.343093 | 0.084273 | 0        | 0        | 5.965066 | -0.34163 | 102.5836 | 1.72E-16 | 1.38E-15 |
| LOC114289739 | 2.892277 | 2.726537 | 3.990807 | 0        | 0        | 0        | 8.203524 | -0.25786 | 119.104  | 5.58E-18 | 5.07E-17 |
| LOC114289851 | 3.889095 | 3.307962 | 4.180885 | 0.661193 | 0.600694 | 0.384545 | 2.702542 | 1.283859 | 179.149  | 4.86E-23 | 6.74E-22 |
| LOC114289880 | 0.212009 | 0.190977 | 0.217413 | 3.031764 | 2.609637 | 2.89442  | -3.86639 | 1.726468 | 474.7623 | 1.84E-37 | 7.73E-36 |
| LOC114289917 | 2.489184 | 2.277288 | 2.064377 | 0.239297 | 0.479601 | 0.328955 | 2.564585 | 1.762271 | 226.8345 | 3.98E-26 | 7.04E-25 |
| LOC114289922 | 0        | 0        | 0.04242  | 5.193492 | 5.332513 | 4.881771 | -8.35111 | 2.036051 | 862.406  | 1.34E-47 | 1.14E-45 |
| LOC114289988 | 3.114274 | 2.716584 | 3.104951 | 1.36288  | 1.196904 | 1.294646 | 1.113582 | 3.73412  | 251.812  | 1.07E-27 | 2.11E-26 |
| LOC114289964 | 0.814419 | 0.917034 | 0.559272 | 5.551753 | 6.11977  | 4.197513 | -2.86259 | -0.11034 | 87.20142 | 7.42E-15 | 5.24E-14 |
| LOC114290039 | 0.2254   | 0.2256   | 0.247656 | 1.429527 | 1.297622 | 1.390612 | -2.65888 | 2.299686 | 425.6515 | 1.08E-35 | 3.91E-34 |
| LOC114290043 | 0.649353 | 0.671886 | 0.867735 | 0.287126 | 0.226074 | 0.385933 | 1.157234 | -0.0332  | 17.37513 | 7.09E-05 | 0.000183 |
| LOC114290085 | 0.02434  | 0.013704 | 0        | 1.924727 | 1.898687 | 1.923577 | -7.10218 | 1.276699 | 515.9839 | 7.89E-39 | 3.65E-37 |
| LOC114290091 | 1.631894 | 1.473646 | 1.704266 | 2.790265 | 3.145123 | 3.131142 | -1.02468 | 2.135884 | 71.0397  | 5.66E-13 | 3.39E-12 |
| LOC114290140 | 0        | 0.061579 | 0        | 8.151976 | 6.340317 | 6.915104 | -8.06801 | 0.992425 | 427.2896 | 9.34E-36 | 3.42E-34 |

|              |          |          |          |          |          |          |          |          |          |          |          |
|--------------|----------|----------|----------|----------|----------|----------|----------|----------|----------|----------|----------|
| LOC114290148 | 0.89211  | 0.558063 | 0.490099 | 1.891979 | 2.26999  | 2.656584 | -1.90739 | -0.09427 | 46.80183 | 9.56E-10 | 4.28E-09 |
| LOC114290284 | 6.674834 | 4.302551 | 4.41098  | 10.99063 | 9.969009 | 10.43696 | -1.11784 | 2.304788 | 82.53163 | 1.01E-13 | 6.42E-13 |
| LOC114290406 | 1.354839 | 1.209916 | 1.796608 | 4.161376 | 2.808453 | 2.953661 | -1.2623  | 0.658255 | 37.22012 | 2.67E-08 | 1.04E-07 |
| LOC114290438 | 1.150682 | 1.376645 | 1.185284 | 3.137602 | 2.676313 | 2.569933 | -1.26361 | -0.16176 | 21.53652 | 1.19E-05 | 3.4E-05  |
| LOC114290455 | 2.084707 | 2.133977 | 1.769974 | 0.861278 | 0.474699 | 1.041898 | 1.223415 | -0.02737 | 19.14459 | 3.28E-05 | 8.85E-05 |
| LOC114290537 | 3.876908 | 3.659707 | 3.739266 | 1.179004 | 1.095195 | 1.151821 | 1.615939 | 3.335304 | 388.0533 | 3.18E-34 | 1.03E-32 |
| LOC114290617 | 0.678312 | 0.48604  | 0.519444 | 1.158319 | 0.970862 | 1.553786 | -1.22989 | 0.450516 | 30.94093 | 2.76E-07 | 9.58E-07 |
| LOC114290684 | 1.289664 | 0.949488 | 1.662259 | 2.750136 | 2.839823 | 2.045208 | -1.06012 | 1.258664 | 38.51584 | 2.32E-08 | 9.07E-08 |
| LOC114290820 | 5.935957 | 5.364128 | 6.563626 | 41.85618 | 40.9652  | 41.15564 | -2.89836 | 4.271829 | 1849.751 | 2.21E-61 | 5.48E-59 |
| LOC114290841 | 2.080221 | 1.940783 | 1.480215 | 5.762241 | 4.763845 | 5.44582  | -1.63131 | 2.46954  | 195.0093 | 4.47E-24 | 6.73E-23 |
| LOC114290888 | 0.319436 | 0.339702 | 0.448472 | 1.064577 | 0.660409 | 1.024411 | -1.40168 | 0.183689 | 32.47583 | 1.54E-07 | 5.51E-07 |
| LOC114291051 | 0.226514 | 0.103616 | 0.194438 | 0.643379 | 0.577496 | 0.39888  | -1.68732 | 0.641931 | 58.589   | 4.51E-11 | 2.28E-10 |
| LOC114291141 | 4.564193 | 4.660343 | 4.871074 | 10.61645 | 10.0683  | 11.15205 | -1.28197 | 3.839456 | 391.2685 | 2.36E-34 | 7.72E-33 |
| LOC114291232 | 3.307923 | 3.289711 | 2.679488 | 0.482813 | 0.449269 | 0.464597 | 2.622341 | 1.215262 | 166.4912 | 4.24E-22 | 5.41E-21 |
| LOC114291214 | 0.644923 | 0.776264 | 0.659735 | 1.73832  | 1.877977 | 1.7422   | -1.47187 | 0.79188  | 57.73765 | 2.86E-11 | 1.47E-10 |
| LOC114291228 | 2.854014 | 2.32642  | 2.635632 | 0.445603 | 0.250609 | 0.336907 | 2.839035 | 1.396651 | 208.7833 | 4.46E-25 | 7.29E-24 |
| LOC114291722 | 12.12689 | 16.55134 | 12.92055 | 2.672063 | 0        | 0        | 4.009396 | -0.48839 | 63.72982 | 1.12E-11 | 5.96E-11 |
| LOC114291834 | 1.031788 | 1.161791 | 1.162736 | 2.981732 | 2.61278  | 2.836177 | -1.42925 | 1.195225 | 72.43912 | 3.82E-13 | 2.32E-12 |
| LOC114291905 | 0.546978 | 0.410597 | 0.443152 | 0.070305 | 0.047448 | 0.113904 | 2.46597  | 0.672618 | 99.27804 | 3.76E-16 | 2.94E-15 |
| LOC114291936 | 1.367839 | 1.432371 | 1.412727 | 0.124324 | 0.097889 | 0.150397 | 3.366784 | 0.84414  | 175.8214 | 8.51E-23 | 1.16E-21 |
| LOC114291956 | 2.02478  | 1.855211 | 1.548573 | 0.433022 | 0.369359 | 0.545658 | 1.893117 | 0.861584 | 78.9262  | 6.47E-14 | 4.21E-13 |
| LOC114292002 | 10.48668 | 10.38507 | 10.00244 | 0.148572 | 0.170971 | 0.112331 | 6.052753 | 4.607197 | 4113.833 | 2.34E-76 | 1.91E-73 |
| LOC114292071 | 7.887409 | 8.45733  | 8.035955 | 3.226028 | 3.489384 | 3.055037 | 1.211957 | 3.25759  | 211.1154 | 3.15E-25 | 5.22E-24 |
| LOC114292129 | 0.766671 | 0.750669 | 1.208622 | 1.999614 | 2.099238 | 2.244865 | -1.33039 | 0.50451  | 37.86202 | 2.12E-08 | 8.33E-08 |
| LOC114292294 | 1.771141 | 1.4652   | 1.495925 | 0.153315 | 0.086225 | 0.165596 | 3.43683  | 1.168457 | 221.6451 | 6.73E-26 | 1.17E-24 |
| LOC114292303 | 0.710695 | 0.683843 | 0.809266 | 0.211405 | 0.277422 | 0.159837 | 1.651872 | 0.273905 | 41.09395 | 6.74E-09 | 2.78E-08 |

|              |          |          |          |          |          |          |          |          |          |          |          |
|--------------|----------|----------|----------|----------|----------|----------|----------|----------|----------|----------|----------|
| LOC114292326 | 0.295982 | 0.212729 | 0.283692 | 0.14882  | 0.090135 | 0.129829 | 1.019302 | 0.022758 | 14.41023 | 0.000268 | 0.000632 |
| LOC114292399 | 2.274226 | 1.792541 | 1.749151 | 4.754256 | 2.44131  | 4.063404 | -1.01814 | -0.31118 | 12.21333 | 0.000741 | 0.00163  |
| LOC114292442 | 0.64254  | 0.704948 | 0.868906 | 0        | 0        | 0        | 8.114889 | -0.334   | 113.3109 | 1.95E-17 | 1.69E-16 |
| LOC114292544 | 6.238161 | 5.238353 | 5.924754 | 11.91647 | 10.21495 | 12.35198 | -1.08597 | 2.32514  | 87.95872 | 6.12E-15 | 4.35E-14 |
| LOC114292574 | 0.79197  | 0.761255 | 0.87017  | 2.352615 | 2.847673 | 2.814127 | -1.83867 | 1.473405 | 136.994  | 1.04E-19 | 1.09E-18 |
| LOC114292592 | 0        | 0        | 0        | 13.5972  | 12.54129 | 12.33652 | -9.63658 | 0.870355 | 414.689  | 7.11E-35 | 2.44E-33 |
| LOC114292586 | 0.230555 | 0.103842 | 0.151992 | 5.993232 | 5.345852 | 4.689738 | -5.08354 | 1.871391 | 627.2717 | 4.22E-42 | 2.48E-40 |
| LOC114292665 | 2.348808 | 1.935185 | 1.951286 | 0.104139 | 0        | 0        | 5.694566 | -0.5765  | 83.39823 | 1.98E-14 | 1.35E-13 |
| LOC114292687 | 1.20362  | 1.645689 | 1.41693  | 0.312567 | 0.123052 | 0.295403 | 2.442411 | 0.348825 | 76.19275 | 1.36E-13 | 8.58E-13 |
| LOC114292778 | 1.100049 | 1.061702 | 0.928086 | 0.535632 | 0.393623 | 0.350978 | 1.192116 | 0.273732 | 23.42582 | 5.42E-06 | 1.62E-05 |
| LOC114292907 | 0.062388 | 0.052687 | 0.034274 | 4.224543 | 4.799642 | 4.523117 | -6.53279 | 2.173057 | 921.9217 | 8.93E-49 | 8.45E-47 |
| LOC114292906 | 0.012872 | 0.014494 | 0.042429 | 5.685982 | 5.950845 | 5.201258 | -7.91077 | 2.75825  | 1437.289 | 9.42E-57 | 1.71E-54 |
| LOC114292928 | 0.267705 | 0.320274 | 0.294138 | 2.372365 | 1.5566   | 2.207598 | -2.88453 | 1.096287 | 203.491  | 9.95E-25 | 1.57E-23 |
| LOC114292927 | 0.226341 | 0.237868 | 0.265269 | 0.932613 | 0.907087 | 0.89177  | -1.99991 | 0.253097 | 67.78093 | 1.43E-12 | 8.27E-12 |
| LOC114292976 | 0.945264 | 0.906149 | 0.800004 | 0.023221 | 0        | 0        | 6.619514 | 0.231563 | 169.4287 | 2.54E-22 | 3.3E-21  |
| LOC114293102 | 1.00445  | 1.330598 | 1.460688 | 2.362942 | 2.494763 | 2.415902 | -1.05266 | 1.939994 | 63.00612 | 5.8E-12  | 3.17E-11 |
| LOC114293107 | 0.262164 | 0.19101  | 0.389716 | 5.830951 | 5.098764 | 5.616733 | -4.38452 | 2.532791 | 858.615  | 1.6E-47  | 1.35E-45 |
| LOC114293157 | 2.302334 | 1.753698 | 2.604072 | 5.169992 | 3.682995 | 4.374217 | -1.07176 | 0.608163 | 26.94006 | 1.31E-06 | 4.22E-06 |
| LOC114293202 | 2.015791 | 1.687782 | 1.987671 | 0        | 0        | 0        | 7.835213 | -0.57919 | 93.63971 | 1.83E-15 | 1.36E-14 |
| LOC114293252 | 1.900124 | 1.627907 | 2.04236  | 3.904619 | 3.369978 | 3.832136 | -1.0942  | 2.045268 | 74.97861 | 1.89E-13 | 1.18E-12 |
| LOC114293313 | 4.174873 | 3.793299 | 4.155646 | 1.953649 | 1.538237 | 1.675934 | 1.1374   | 2.092759 | 77.48511 | 9.55E-14 | 6.11E-13 |
| LOC114293311 | 0        | 0        | 0        | 1.231939 | 1.177842 | 1.264086 | -8.39864 | -0.35378 | 168.7109 | 4.38E-22 | 5.58E-21 |
| LOC114293390 | 10.37792 | 8.950182 | 9.42044  | 0.194821 | 0.409056 | 0.147299 | 5.124574 | 3.040738 | 1124.449 | 9.98E-49 | 9.33E-47 |
| LOC114293398 | 1.8623   | 1.883697 | 1.919023 | 0.019126 | 0.090356 | 0        | 5.498374 | 1.513108 | 382.1812 | 4.41E-32 | 1.21E-30 |
| LOC114293640 | 0.458831 | 0.528658 | 0.457241 | 0.232765 | 0.213816 | 0.219983 | 1.007364 | 0.117074 | 15.54953 | 0.00016  | 0.00039  |
| LOC114293818 | 3.960707 | 4.459747 | 4.645834 | 0.486477 | 0.229821 | 0.36781  | 3.489491 | 0.526862 | 141.1314 | 4.59E-20 | 4.94E-19 |



|              |          |          |          |          |          |          |          |          |          |          |          |
|--------------|----------|----------|----------|----------|----------|----------|----------|----------|----------|----------|----------|
| LOC114293923 | 12.98058 | 14.96411 | 13.32846 | 0.983182 | 0.774125 | 0.637161 | 4.008797 | 1.551672 | 344.2114 | 2.36E-32 | 6.65E-31 |
| LOC114293927 | 6.581788 | 5.982437 | 6.708913 | 1.87396  | 1.815992 | 1.961785 | 1.657829 | 0.746548 | 60.65289 | 1.17E-11 | 6.25E-11 |
| LOC114293962 | 0.136179 | 0.195932 | 0.315877 | 1.746602 | 1.91664  | 1.81966  | -3.19763 | 2.054312 | 416.9033 | 2.97E-33 | 8.92E-32 |
| LOC114294038 | 1.419429 | 1.425213 | 1.56952  | 0.575219 | 0.478789 | 0.546739 | 1.36172  | 1.772584 | 88.20372 | 5.75E-15 | 4.1E-14  |
| LOC114294086 | 0        | 0        | 0        | 1.489272 | 1.612329 | 1.372305 | -8.60019 | -0.15869 | 194.3169 | 6.73E-24 | 1E-22    |
| LOC114294126 | 0.332967 | 0.395749 | 0.65039  | 1.210548 | 1.350289 | 1.296617 | -1.59955 | 0.555754 | 53.83753 | 9.67E-11 | 4.76E-10 |
| LOC114294193 | 4.543599 | 3.475074 | 4.850951 | 0        | 0        | 0        | 9.278168 | 0.704087 | 257.3927 | 9.69E-28 | 1.92E-26 |
| LOC114294194 | 5.50894  | 5.060386 | 5.688818 | 1.280019 | 1.600694 | 1.650926 | 1.719761 | 2.348713 | 189.1792 | 9.4E-24  | 1.39E-22 |
| LOC114294220 | 1.49848  | 1.555466 | 1.556402 | 0.553306 | 0.611592 | 0.675777 | 1.206577 | 2.481892 | 111.2136 | 2.38E-17 | 2.05E-16 |
| LOC114294291 | 2.967304 | 2.419474 | 2.529544 | 0.139501 | 0.109838 | 0.105472 | 4.355735 | 0.799766 | 214.178  | 2E-25    | 3.37E-24 |
| LOC114294345 | 0.863805 | 0.841709 | 0.949098 | 0        | 0        | 0.068493 | 4.895473 | -0.08461 | 110.9622 | 2.51E-17 | 2.16E-16 |
| LOC114294358 | 1.208024 | 0.906822 | 1.106089 | 6.221921 | 3.554127 | 4.335249 | -2.18663 | 0.403976 | 81.40405 | 3.35E-14 | 2.23E-13 |
| LOC114294381 | 3.18461  | 3.107749 | 2.56598  | 0        | 0        | 0        | 10.3356  | 1.693341 | 539.6045 | 7.94E-39 | 3.67E-37 |
| LOC114294415 | 0.454034 | 0.349796 | 0.393841 | 3.323127 | 3.078257 | 3.317178 | -3.11161 | 2.226557 | 503.5315 | 2E-38    | 8.97E-37 |
| LOC114294429 | 2.422306 | 2.745695 | 2.466313 | 6.194003 | 5.963285 | 5.770643 | -1.3356  | 3.01441  | 220.6483 | 7.77E-26 | 1.34E-24 |
| LOC114294439 | 0.340742 | 0.316949 | 0.179055 | 1.238818 | 1.272266 | 1.466034 | -2.34423 | 0.743743 | 119.9791 | 3.47E-18 | 3.22E-17 |
| LOC114294520 | 13.10357 | 12.19784 | 12.42234 | 4.90158  | 3.859339 | 4.291084 | 1.437367 | 2.442666 | 147.6879 | 1.3E-20  | 1.46E-19 |
| LOC114294551 | 1.411784 | 1.042404 | 1.551186 | 0        | 0        | 0.031809 | 6.359904 | -0.00271 | 136.6924 | 1.1E-19  | 1.15E-18 |
| LOC114294562 | 0.95582  | 1.132896 | 0.829105 | 3.840812 | 3.312139 | 3.733614 | -1.99376 | 0.503289 | 79.91631 | 4.97E-14 | 3.27E-13 |
| LOC114294577 | 2.138462 | 2.301895 | 2.327451 | 0.660115 | 0.510127 | 0.711669 | 1.740657 | 2.696623 | 243.3326 | 3.29E-27 | 6.26E-26 |
| LOC114294581 | 2.016367 | 1.219302 | 1.394924 | 0.610899 | 0.587891 | 0.513203 | 1.344291 | -0.07297 | 21.66584 | 1.12E-05 | 3.23E-05 |
| LOC114294580 | 0.577389 | 0.597425 | 0.480088 | 0.226939 | 0.24569  | 0.193029 | 1.205513 | -0.25058 | 16.09691 | 0.000125 | 0.000311 |
| LOC114294729 | 1.797302 | 2.066817 | 2.394935 | 0        | 0        | 0        | 8.396442 | -0.0862  | 138.963  | 9.88E-20 | 1.04E-18 |
| LOC114294737 | 1.329419 | 1.289017 | 0.892642 | 2.685162 | 2.589903 | 1.624136 | -1.0508  | 0.552223 | 23.66846 | 5.06E-06 | 1.52E-05 |
| LOC114294788 | 0        | 0.047455 | 0        | 14.78604 | 12.90878 | 13.20661 | -9.38355 | 2.316899 | 1078.292 | 1.47E-51 | 1.79E-49 |
| LOC114294819 | 0.713219 | 0.544949 | 0.699681 | 2.685616 | 2.333312 | 2.485628 | -2.02519 | 0.931341 | 111.3089 | 2.33E-17 | 2.01E-16 |

|              |          |          |          |          |          |          |          |          |          |          |          |
|--------------|----------|----------|----------|----------|----------|----------|----------|----------|----------|----------|----------|
| LOC114294821 | 1.164954 | 1.180563 | 1.023987 | 3.600055 | 4.335213 | 3.789301 | -1.90454 | 1.002211 | 105.1765 | 9.4E-17  | 7.72E-16 |
| LOC114294879 | 0.634389 | 0.750037 | 1.115248 | 1.672149 | 1.452794 | 1.787404 | -1.0844  | 0.294899 | 21.78457 | 1.07E-05 | 3.08E-05 |
| LOC114295063 | 0.714981 | 0.82184  | 0.851045 | 0.243695 | 0.234517 | 0.450391 | 1.216333 | 0.281275 | 23.85635 | 4.54E-06 | 1.37E-05 |
| LOC114295124 | 36.57582 | 28.4897  | 35.22104 | 71.11605 | 67.14865 | 73.61955 | -1.18266 | 4.934875 | 409.8758 | 3.7E-19  | 3.71E-18 |
| LOC114295145 | 0.79648  | 0.978365 | 0.875126 | 0.329059 | 0.431816 | 0.315136 | 1.179837 | 0.717574 | 31.86484 | 1.94E-07 | 6.87E-07 |
| LOC114295154 | 0.044396 | 0.024995 | 0.060974 | 0.423692 | 0.397144 | 0.503392 | -3.39839 | -0.53119 | 81.29467 | 3.44E-14 | 2.3E-13  |
| LOC114295144 | 0        | 0        | 0        | 1.871662 | 2.063157 | 2.217001 | -8.64745 | -0.11739 | 201.5547 | 2.21E-24 | 3.4E-23  |
| LOC114295194 | 0.87269  | 0.655098 | 0.996464 | 2.581781 | 2.522641 | 2.422369 | -1.67246 | 1.58953  | 122.615  | 1.98E-18 | 1.87E-17 |
| LOC114295230 | 0.665437 | 0.744217 | 0.755844 | 1.691868 | 1.602406 | 1.866229 | -1.3629  | 3.056115 | 235.3202 | 9.8E-27  | 1.82E-25 |
| LOC114295270 | 2.350961 | 2.086826 | 1.904329 | 0.093583 | 0.17193  | 0.117926 | 3.89264  | 1.057181 | 232.6228 | 1.42E-26 | 2.61E-25 |
| LOC114295343 | 0.848831 | 0.919021 | 1.022323 | 0.148368 | 0.093456 | 0.067306 | 3.089078 | 0.089619 | 87.69217 | 6.55E-15 | 4.64E-14 |
| LOC114295416 | 0.46544  | 0.557896 | 0.626875 | 1.200897 | 1.224912 | 0.82542  | -1.0732  | 0.757875 | 29.33656 | 5.11E-07 | 1.73E-06 |
| LOC114295405 | 0.43937  | 0.453503 | 0.844821 | 1.131487 | 1.78179  | 1.559999 | -1.49331 | -0.14093 | 28.37199 | 7.45E-07 | 2.47E-06 |
| LOC114295452 | 3.901746 | 3.311916 | 4.26063  | 1.287594 | 1.18564  | 0.990011 | 1.635139 | 2.649727 | 203.2414 | 1.54E-24 | 2.4E-23  |
| LOC114295484 | 5.669994 | 5.8149   | 5.878881 | 2.129153 | 1.752625 | 2.195166 | 1.410156 | 2.164747 | 120.4467 | 3.14E-18 | 2.92E-17 |
| LOC114295535 | 0.892644 | 0.913741 | 1.129389 | 0.29503  | 0.116148 | 0.148709 | 2.323325 | -0.41511 | 40.13966 | 9.42E-09 | 3.84E-08 |
| LOC114295589 | 1.489041 | 1.720779 | 0.990254 | 0        | 0.056086 | 0        | 5.667769 | -0.59787 | 78.85986 | 6.59E-14 | 4.27E-13 |
| LOC114295677 | 1.372174 | 1.147326 | 1.552447 | 0.296361 | 0.213899 | 0.168052 | 2.50847  | 0.89423  | 121.3805 | 2.57E-18 | 2.41E-17 |
| LOC114295711 | 0.213561 | 0.360704 | 0.312865 | 0.621146 | 0.519636 | 0.606605 | -1.08848 | 0.935157 | 34.13978 | 8.26E-08 | 3.05E-07 |
| LOC114295717 | 28.28199 | 27.02561 | 27.4539  | 12.75255 | 12.42352 | 12.95692 | 1.012555 | 5.146257 | 541.6019 | 1.24E-39 | 6.08E-38 |
| LOC114295724 | 0.071775 | 0.094288 | 0.105149 | 2.913918 | 3.201776 | 3.008745 | -5.16111 | 2.009758 | 730.7525 | 1.03E-44 | 7.17E-43 |
| LOC114295762 | 0.360722 | 0.406172 | 0.541343 | 1.18351  | 1.120745 | 1.064105 | -1.4681  | 1.446528 | 87.05153 | 7.71E-15 | 5.42E-14 |
| LOC114295896 | 0.356652 | 0.155718 | 0.383872 | 0.066156 | 0.072925 | 0.060022 | 2.059798 | -0.216   | 35.6919  | 7.14E-08 | 2.65E-07 |
| LOC114295903 | 0.1795   | 0.151587 | 0.221877 | 1.590703 | 1.252466 | 1.449387 | -3.02656 | 0.151007 | 116.8499 | 6.83E-18 | 6.17E-17 |
| LOC114295948 | 1.699838 | 1.740012 | 1.612999 | 0.280909 | 0.608241 | 0.31858  | 1.916568 | -0.12203 | 38.29253 | 1.82E-08 | 7.19E-08 |
| LOC114295981 | 3.032301 | 1.92058  | 3.331715 | 9.12955  | 11.66404 | 11.72136 | -2.08041 | 1.148852 | 129.2337 | 4.96E-19 | 4.92E-18 |

|              |          |          |          |          |          |          |          |          |          |          |          |
|--------------|----------|----------|----------|----------|----------|----------|----------|----------|----------|----------|----------|
| LOC114296060 | 0.138318 | 0.200244 | 0.173686 | 0.628592 | 0.509073 | 0.624627 | -1.88284 | 0.258168 | 60.12085 | 1.38E-11 | 7.31E-11 |
| LOC114296057 | 1.327764 | 1.343019 | 1.23633  | 0        | 0.03221  | 0        | 6.361033 | 0.001404 | 140.8911 | 4.81E-20 | 5.17E-19 |
| LOC114296108 | 2.07566  | 1.804146 | 2.080561 | 0.099294 | 0.260603 | 0.150147 | 3.381401 | 0.924039 | 181.8126 | 3.12E-23 | 4.42E-22 |
| LOC114296157 | 15.67383 | 14.62439 | 16.7768  | 7.290263 | 7.003986 | 7.079566 | 1.035295 | 3.224366 | 155.105  | 3.27E-21 | 3.89E-20 |
| LOC114296230 | 4.342612 | 4.054932 | 3.60765  | 34.75326 | 33.2759  | 29.84242 | -3.12127 | 3.415822 | 1209.599 | 1.26E-53 | 1.76E-51 |
| LOC114296367 | 0.377957 | 0.328856 | 0.386963 | 1.655186 | 1.463069 | 1.582004 | -2.19809 | 1.78669  | 228.1272 | 2.67E-26 | 4.79E-25 |
| LOC114296446 | 0.706578 | 0.432903 | 0.673595 | 0.188887 | 0.148723 | 0.185656 | 1.69406  | 0.299563 | 42.36305 | 4.33E-09 | 1.82E-08 |
| LOC114296454 | 5.853564 | 5.198614 | 5.344532 | 1.498695 | 0.885017 | 1.473053 | 1.993817 | 1.355487 | 122.3121 | 2.11E-18 | 1.99E-17 |
| LOC114296448 | 0.038999 | 0.029275 | 0.057134 | 0.756201 | 0.94893  | 0.821877 | -4.38017 | 0.072013 | 166.8568 | 3.98E-22 | 5.08E-21 |
| LOC114296461 | 0.60536  | 0.580651 | 0.689769 | 1.181951 | 1.091081 | 1.232603 | -1.00431 | 0.334697 | 20.24713 | 2.05E-05 | 5.68E-05 |
| LOC114296530 | 0.335349 | 0.269716 | 0.368462 | 2.002986 | 1.78279  | 1.843613 | -2.59881 | -0.45805 | 60.44191 | 1.25E-11 | 6.65E-11 |
| LOC114296648 | 0        | 0        | 0        | 0.393021 | 0.489965 | 0.482871 | -8.41121 | -0.34621 | 168.8123 | 4.31E-22 | 5.49E-21 |
| LOC114296707 | 0.678682 | 0.611356 | 0.347992 | 2.056205 | 1.23043  | 2.487415 | -1.89835 | -0.20812 | 40.47768 | 8.96E-09 | 3.65E-08 |
| LOC114296806 | 2.476085 | 2.788066 | 3.028568 | 0        | 0        | 0        | 8.51433  | 0.017998 | 152.7245 | 7.41E-21 | 8.5E-20  |
| LOC114296835 | 10.79336 | 10.44853 | 10.08829 | 23.34916 | 21.87946 | 21.6139  | -1.19298 | 3.357158 | 245.3834 | 2.5E-27  | 4.81E-26 |
| LOC114296892 | 1.290634 | 1.137327 | 1.664694 | 2.448148 | 3.132332 | 2.622208 | -1.11399 | 0.210943 | 22.08963 | 9.42E-06 | 2.73E-05 |
| LOC114296895 | 0.059318 | 0        | 0.065175 | 6.46976  | 5.009171 | 5.625328 | -6.87257 | 0.556844 | 305.3292 | 1.57E-30 | 3.88E-29 |
| LOC114296905 | 0        | 0        | 0.173572 | 1.579424 | 1.300112 | 1.411274 | -4.60941 | -0.75055 | 86.43661 | 1.23E-14 | 8.48E-14 |
| LOC114296927 | 0.115209 | 0.072069 | 0.08439  | 1.628892 | 1.612329 | 1.706584 | -4.24922 | 1.057333 | 331.4308 | 8.98E-32 | 2.42E-30 |
| LOC114296945 | 2.355891 | 3.20795  | 2.347723 | 0        | 0        | 0        | 8.215579 | -0.24434 | 120.3943 | 4.24E-18 | 3.9E-17  |
| LOC114296984 | 1.834508 | 2.027399 | 2.426246 | 0.123511 | 0.243122 | 0.140075 | 3.45963  | 0.162931 | 104.4652 | 1.11E-16 | 9.05E-16 |
| LOC114297022 | 3.19075  | 3.343086 | 3.465202 | 0.671839 | 0.63478  | 0.541821 | 2.336407 | 2.286507 | 296.9668 | 4.1E-30  | 9.82E-29 |
| LOC114297128 | 1.9884   | 1.823462 | 1.779323 | 0.633479 | 0.7335   | 0.901561 | 1.175119 | 1.014155 | 39.85024 | 1.04E-08 | 4.23E-08 |
| LOC114297242 | 1.664834 | 1.452814 | 1.417647 | 0        | 0        | 0        | 7.821155 | -0.59131 | 92.66861 | 2.32E-15 | 1.71E-14 |
| LOC114297284 | 0.694961 | 0.469514 | 0.55996  | 0.20213  | 0.1061   | 0.16556  | 1.786641 | 0.370257 | 48.8062  | 4.92E-10 | 2.27E-09 |
| LOC114297314 | 1.582188 | 1.700561 | 1.764756 | 0.653667 | 0.548987 | 0.593061 | 1.387237 | 0.61198  | 40.27526 | 8.98E-09 | 3.66E-08 |

|              |          |          |          |          |          |          |          |          |          |          |          |
|--------------|----------|----------|----------|----------|----------|----------|----------|----------|----------|----------|----------|
| LOC114297354 | 0        | 0        | 0        | 2.081    | 2.167061 | 2.385449 | -8.64783 | -0.11609 | 201.9494 | 2.09E-24 | 3.22E-23 |
| LOC114297538 | 0.199065 | 0.112073 | 0.218721 | 0.859429 | 1.068451 | 0.718187 | -2.38954 | -0.55215 | 47.97591 | 6.47E-10 | 2.95E-09 |
| LOC114297553 | 3.263445 | 3.125154 | 3.887282 | 1.330623 | 1.30961  | 1.299473 | 1.274808 | 1.279713 | 55.50647 | 5.72E-11 | 2.86E-10 |
| LOC114297635 | 2.216474 | 1.693541 | 1.681539 | 0        | 0.113301 | 0        | 5.309144 | 0.274915 | 150.094  | 2.04E-20 | 2.26E-19 |
| LOC114297654 | 0.045314 | 0.051023 | 0.049788 | 1.894553 | 1.945706 | 1.556972 | -5.11168 | -0.64501 | 110.7724 | 2.62E-17 | 2.25E-16 |
| LOC114297677 | 3.097386 | 3.244326 | 3.587899 | 0.654709 | 0.515496 | 0.462005 | 2.513491 | 1.329076 | 171.9073 | 1.66E-22 | 2.19E-21 |
| LOC114297709 | 0.639437 | 0.480003 | 0.468384 | 1.501411 | 1.487235 | 1.17179  | -1.46762 | 0.176151 | 36.11343 | 3.99E-08 | 1.53E-07 |
| LOC114297710 | 0.280655 | 0.249487 | 0.162299 | 0.429626 | 0.739972 | 0.548146 | -1.4227  | -0.18945 | 25.24443 | 2.58E-06 | 8.04E-06 |
| LOC114297727 | 1.275889 | 1.309885 | 1.814187 | 0.136432 | 0.214843 | 0.154728 | 2.950595 | -0.38566 | 56.50864 | 4.18E-11 | 2.12E-10 |
| LOC114297754 | 0.613436 | 0.493377 | 0.632742 | 0.022757 | 0        | 0.017206 | 5.218964 | -0.26584 | 103.3061 | 1.45E-16 | 1.18E-15 |
| LOC114297833 | 1.534158 | 1.385662 | 1.280007 | 0.447405 | 0.340529 | 0.338269 | 1.813762 | 1.739494 | 137.1019 | 1.01E-19 | 1.07E-18 |
| LOC114297998 | 0.747909 | 0.814978 | 0.874775 | 0.438569 | 0.207189 | 0.232112 | 1.410646 | -0.3568  | 19.06661 | 3.4E-05  | 9.14E-05 |
| LOC114298099 | 0.893089 | 0.633166 | 0.72687  | 0.400858 | 0.252498 | 0.394    | 1.016858 | 0.671912 | 22.93723 | 6.63E-06 | 1.96E-05 |
| LOC114298101 | 0.044423 | 0        | 0.01627  | 1.265127 | 0.974924 | 0.895469 | -5.5583  | 0.129795 | 195.4574 | 3.46E-24 | 5.24E-23 |
| LOC114298129 | 1.316632 | 1.249424 | 1.410245 | 0.737589 | 0.521493 | 0.386954 | 1.203713 | 1.79875  | 65.22217 | 4.42E-12 | 2.44E-11 |
| LOC114298152 | 3.151839 | 2.993318 | 2.973332 | 1.07066  | 1.230327 | 1.203302 | 1.264906 | 2.019378 | 90.99814 | 2.84E-15 | 2.08E-14 |
| LOC114298198 | 0        | 0        | 0        | 2.705052 | 2.763756 | 2.775639 | -10.0136 | 1.246319 | 545.0263 | 2.99E-39 | 1.43E-37 |
| LOC114298265 | 0.021206 | 0        | 0        | 2.004518 | 1.699697 | 1.748718 | -7.46567 | 0.388671 | 278.7041 | 3.58E-29 | 7.98E-28 |
| LOC114298305 | 0.912683 | 0.724429 | 0.821969 | 0.46237  | 0.34264  | 0.246765 | 1.158625 | 0.343224 | 23.01886 | 6.41E-06 | 1.9E-05  |
| LOC114298335 | 0.48374  | 0.531405 | 0.648178 | 0.042895 | 0.067549 | 0.048648 | 3.215113 | -0.1718  | 74.69621 | 2.04E-13 | 1.27E-12 |
| LOC114298360 | 1.191016 | 0.797637 | 1.17177  | 2.094301 | 2.217213 | 2.353759 | -1.18038 | 2.687989 | 122.9317 | 8.47E-18 | 7.6E-17  |
| LOC114298419 | 3.559311 | 3.226599 | 3.811337 | 0.383825 | 0.518076 | 0.414569 | 2.879123 | 1.063155 | 171.0078 | 1.93E-22 | 2.54E-21 |
| LOC114298486 | 1.30812  | 1.630756 | 1.180628 | 7.473492 | 7.355471 | 8.668352 | -2.62004 | 1.598475 | 260.4741 | 3.47E-28 | 7.15E-27 |
| LOC114298547 | 2.519874 | 2.216697 | 1.64391  | 0        | 0        | 0        | 8.977094 | 0.429061 | 202.048  | 1.48E-23 | 2.15E-22 |
| LOC114298633 | 0.441285 | 0.283935 | 0.346328 | 4.125487 | 3.789648 | 3.552372 | -3.46743 | 0.033048 | 127.9095 | 6.52E-19 | 6.41E-18 |
| LOC114298631 | 2.584122 | 2.219274 | 2.213678 | 6.210217 | 6.707688 | 6.320673 | -1.55601 | 1.620901 | 113.211  | 1.52E-17 | 1.33E-16 |

|              |          |          |          |          |          |          |          |          |          |          |          |
|--------------|----------|----------|----------|----------|----------|----------|----------|----------|----------|----------|----------|
| LOC114298650 | 0.101403 | 0.01903  | 0.055708 | 2.488481 | 2.418946 | 2.206657 | -5.33415 | 1.134946 | 400.8191 | 9.79E-35 | 3.31E-33 |
| LOC114298652 | 5.975255 | 5.926096 | 5.282645 | 0.287734 | 0.623018 | 1.14212  | 2.885696 | 2.302833 | 194.5944 | 1.82E-10 | 8.74E-10 |
| LOC114298687 | 2.227837 | 2.12876  | 2.33079  | 0.726061 | 0.597084 | 0.646545 | 1.666349 | 2.30728  | 176.6188 | 7.44E-23 | 1.02E-21 |
| LOC114298670 | 3.5175   | 3.009154 | 3.436281 | 1.418013 | 1.395619 | 1.36     | 1.153081 | 3.295687 | 198.5586 | 2.13E-24 | 3.28E-23 |
| LOC114298749 | 0        | 0        | 0.020325 | 0.36989  | 0.820764 | 0.737292 | -6.22041 | -0.8142  | 102.0827 | 2.2E-16  | 1.75E-15 |
| LOC114298762 | 0        | 0        | 0        | 0.58803  | 0.49861  | 0.495891 | -8.13215 | -0.60232 | 138.1099 | 1.17E-19 | 1.22E-18 |
| LOC114298863 | 2.109344 | 1.696512 | 2.046733 | 0        | 0        | 0        | 8.788861 | 0.25932  | 185.8542 | 2.56E-23 | 3.65E-22 |
| LOC114298885 | 1.030599 | 1.151792 | 1.09856  | 0.125828 | 0.110081 | 0.063423 | 3.366468 | 1.285917 | 236.8783 | 7.91E-27 | 1.47E-25 |
| LOC114298897 | 1.811824 | 1.28849  | 1.624014 | 0.173346 | 0.136487 | 0        | 3.833346 | -0.64272 | 58.95647 | 1.96E-11 | 1.03E-10 |
| LOC114298927 | 0.778835 | 0.626404 | 0.814989 | 0.101127 | 0.013271 | 0.012743 | 4.147237 | 0.471101 | 145.7573 | 6.74E-20 | 7.17E-19 |
| LOC114299007 | 1.134802 | 1.038775 | 1.148183 | 2.611976 | 2.32534  | 2.558311 | -1.27428 | 2.757276 | 166.4319 | 4.28E-22 | 5.46E-21 |
| LOC114299009 | 1.919021 | 1.750532 | 1.681469 | 4.327429 | 4.311242 | 4.306807 | -1.37632 | 2.943571 | 222.4267 | 6.01E-26 | 1.05E-24 |
| LOC114299072 | 0        | 0        | 0        | 7.825329 | 6.721528 | 8.644229 | -10.8456 | 2.087511 | 926.4679 | 3.41E-48 | 3.02E-46 |
| LOC114299104 | 3.825501 | 3.616462 | 3.551398 | 1.710629 | 1.668974 | 1.546402 | 1.057236 | 1.992309 | 64.37559 | 3.86E-12 | 2.15E-11 |
| LOC114299101 | 1.248574 | 1.363924 | 1.494713 | 0.237131 | 0.426764 | 0.30735  | 1.935464 | 0.559452 | 65.76448 | 2.57E-12 | 1.45E-11 |
| LOC114299122 | 2.767213 | 2.968281 | 2.976442 | 0.688357 | 0.917212 | 0.900771 | 1.669228 | 1.978744 | 141.4662 | 4.3E-20  | 4.64E-19 |
| LOC114299234 | 0.011831 | 0        | 0.012999 | 0.967797 | 1.083749 | 1.398402 | -6.91848 | 0.587504 | 308.7544 | 1.07E-30 | 2.68E-29 |
| LOC114299255 | 3.001501 | 2.868284 | 3.059212 | 0.394856 | 0.395686 | 0.542798 | 2.614393 | 1.435596 | 198.6868 | 2.09E-24 | 3.22E-23 |
| LOC114299281 | 12.69121 | 8.867298 | 10.15436 | 4.85069  | 4.005576 | 4.561962 | 1.148054 | 1.83065  | 62.7781  | 6.85E-12 | 3.73E-11 |
| LOC114299320 | 1.354314 | 1.694394 | 1.240034 | 0.547089 | 0.53845  | 0.77557  | 1.070929 | -0.1289  | 14.07725 | 0.000312 | 0.000729 |
| LOC114299335 | 0.35788  | 0.28208  | 0.530844 | 2.37455  | 2.35626  | 3.000407 | -2.82942 | 1.349898 | 236.5009 | 8.33E-27 | 1.55E-25 |
| LOC114299371 | 13.78419 | 12.4868  | 13.06706 | 0        | 0.111255 | 0.035611 | 7.758936 | 2.926549 | 1275.761 | 1.38E-54 | 2.05E-52 |
| LOC114299375 | 5.891883 | 5.7628   | 6.830258 | 0        | 0        | 0        | 10.57493 | 1.92208  | 645.035  | 4.93E-42 | 2.89E-40 |
| LOC114299373 | 12.06275 | 12.13487 | 11.55858 | 0        | 0        | 0.03213  | 9.496547 | 2.933123 | 1357.838 | 1.02E-55 | 1.69E-53 |
| LOC114299374 | 11.0635  | 15.32598 | 13.35553 | 0        | 0        | 0        | 10.1315  | 1.505959 | 448.6658 | 1.42E-32 | 4.04E-31 |
| LOC114299379 | 1.232144 | 1.509092 | 1.496314 | 0.275065 | 0.371275 | 0.772455 | 1.407117 | 0.501587 | 34.55513 | 8.37E-08 | 3.09E-07 |

|              |          |          |          |          |          |          |          |          |          |          |          |
|--------------|----------|----------|----------|----------|----------|----------|----------|----------|----------|----------|----------|
| LOC114299429 | 4.994417 | 5.076716 | 5.304099 | 1.876502 | 1.499223 | 2.002964 | 1.410385 | 2.784337 | 183.6393 | 2.31E-23 | 3.31E-22 |
| LOC114299454 | 61.9149  | 60.88004 | 65.61429 | 28.1019  | 28.75321 | 29.87521 | 1.010606 | 4.130152 | 261.4689 | 3.06E-28 | 6.34E-27 |
| LOC114299524 | 3.331608 | 2.912416 | 3.017344 | 0        | 0        | 0        | 10.81065 | 2.145449 | 761.5443 | 7.87E-45 | 5.52E-43 |
| LOC114299526 | 7.517171 | 8.646739 | 9.007051 | 0        | 0        | 0        | 10.64245 | 1.988418 | 668.6485 | 1.24E-42 | 7.57E-41 |
| LOC114299647 | 1.162419 | 1.165049 | 1.291234 | 0.046441 | 0.018283 | 0.035113 | 5.034239 | 0.659918 | 214.0428 | 2.04E-25 | 3.43E-24 |
| LOC114299704 | 4.008186 | 3.441728 | 3.801981 | 0.419348 | 0.453998 | 0.237792 | 3.242985 | 1.174853 | 209.9629 | 3.74E-25 | 6.16E-24 |
| LOC114299707 | 0.456568 | 0.171365 | 0.334434 | 2.489877 | 2.831755 | 3.242119 | -3.20259 | -0.58403 | 72.33935 | 3.93E-13 | 2.39E-12 |
| LOC114299751 | 3.374149 | 3.667626 | 3.652259 | 0.151822 | 0.358618 | 0.183661 | 3.79223  | 1.809598 | 378.8693 | 7.58E-34 | 2.37E-32 |
| LOC114299760 | 27.27647 | 25.43251 | 28.9629  | 6.17347  | 7.792684 | 6.075255 | 1.914187 | 3.238352 | 441.8362 | 2.7E-36  | 1.04E-34 |
| LOC114299774 | 2.490371 | 3.785605 | 3.557157 | 6.564222 | 6.950671 | 5.818701 | -1.08473 | 0.298294 | 22.16252 | 9.14E-06 | 2.66E-05 |
| LOC114299803 | 0.710042 | 0.468003 | 0.437647 | 1.03888  | 0.99149  | 1.237703 | -1.11043 | 0.559509 | 27.71236 | 9.65E-07 | 3.16E-06 |
| LOC114299817 | 2.074153 | 2.230526 | 1.869258 | 9.447284 | 9.306432 | 10.12164 | -2.33151 | 2.946826 | 552.4129 | 5.81E-40 | 2.91E-38 |
| LOC114299843 | 4.220007 | 4.231999 | 3.912214 | 0.479451 | 0.377504 | 0.181249 | 3.48246  | 0.183316 | 108.1231 | 4.78E-17 | 4.01E-16 |
| LOC114299878 | 2.30762  | 2.623602 | 2.683177 | 0.773806 | 0.673402 | 0.70822  | 1.715191 | 1.1905   | 87.19603 | 7.43E-15 | 5.24E-14 |
| LOC114299911 | 0.623782 | 0.270145 | 0.474491 | 2.4423   | 2.129019 | 2.440083 | -2.41933 | -0.13094 | 67.67533 | 1.48E-12 | 8.51E-12 |
| LOC114300002 | 2.193541 | 2.245384 | 1.947584 | 5.074956 | 3.900711 | 4.872407 | -1.21286 | 2.221401 | 99.48687 | 3.58E-16 | 2.8E-15  |
| LOC114300048 | 0.970336 | 0.870663 | 0.782953 | 0        | 0        | 0        | 9.483537 | 0.894023 | 303.4448 | 4.03E-30 | 9.65E-29 |
| LOC114300052 | 316.5244 | 293.7198 | 314.2457 | 752.0879 | 712.0184 | 731.641  | -1.35353 | 8.825254 | 2979.725 | 1.53E-31 | 4.06E-30 |
| LOC114300163 | 0.42952  | 0.438297 | 0.530923 | 1.610379 | 1.844304 | 1.807891 | -2.02269 | 1.349821 | 148.4285 | 1.13E-20 | 1.28E-19 |
| LOC114300176 | 2.228573 | 2.186735 | 2.081332 | 0.405115 | 0.364541 | 0.175026 | 2.706585 | 1.289925 | 178.1906 | 5.71E-23 | 7.88E-22 |
| LOC114300245 | 1.196177 | 1.232264 | 1.118545 | 2.266966 | 3.424157 | 3.008217 | -1.41679 | 1.312676 | 73.88614 | 2.56E-13 | 1.58E-12 |
| LOC114300244 | 2.08011  | 1.519265 | 1.976652 | 0.919768 | 0.804661 | 0.695409 | 1.114273 | -0.3117  | 13.27276 | 0.000452 | 0.001031 |
| LOC114300225 | 0.656552 | 0.522592 | 0.696506 | 0.308662 | 0.194424 | 0.295602 | 1.138447 | 0.354092 | 22.69413 | 7.33E-06 | 2.16E-05 |
| LOC114300223 | 0        | 0.050045 | 0.048833 | 9.45272  | 10.87787 | 10.56766 | -8.15969 | 1.837812 | 780.057  | 7.58E-46 | 5.72E-44 |
| LOC114300316 | 0.261642 | 0.287423 | 0.189314 | 0        | 0        | 0        | 7.904054 | -0.51816 | 95.87168 | 1.07E-15 | 8.05E-15 |
| LOC114300293 | 336.7799 | 309.2812 | 336.2768 | 66.45219 | 64.49596 | 63.2206  | 2.233292 | 7.377577 | 4724.762 | 5.53E-79 | 5.5E-76  |

|              |          |          |          |          |          |          |          |          |          |          |          |
|--------------|----------|----------|----------|----------|----------|----------|----------|----------|----------|----------|----------|
| LOC114300340 | 1.55268  | 1.910195 | 1.832364 | 4.521218 | 4.691601 | 4.900302 | -1.52718 | 2.786928 | 232.7431 | 1.4E-26  | 2.57E-25 |
| LOC114300350 | 0.816183 | 0.863879 | 0.71742  | 0        | 0        | 0        | 8.245985 | -0.22082 | 125.831  | 1.36E-18 | 1.3E-17  |
| LOC114300373 | 0.647162 | 0.440258 | 0.69625  | 0.196071 | 0.115785 | 0.259426 | 1.528382 | -0.03442 | 27.43    | 1.08E-06 | 3.51E-06 |
| LOC114300541 | 2.119041 | 1.658093 | 1.736344 | 0.718177 | 0.693984 | 0.666399 | 1.308438 | 1.147024 | 52.5489  | 1.46E-10 | 7.06E-10 |
| LOC114300622 | 0.684217 | 0.746843 | 0.652052 | 0.025383 | 0.009993 | 0.047979 | 4.462131 | 0.744827 | 204.3397 | 8.74E-25 | 1.39E-23 |
| LOC114300621 | 3.56339  | 3.45681  | 3.332978 | 0.099655 | 0.078465 | 0.100462 | 5.076211 | 1.592444 | 434.8759 | 4.87E-36 | 1.83E-34 |
| LOC114300866 | 2.420696 | 2.19309  | 2.354005 | 6.221245 | 6.690496 | 5.92742  | -1.53719 | 2.246703 | 163.1678 | 7.62E-22 | 9.53E-21 |
| LOC114300862 | 0.158717 | 0.280837 | 0.298952 | 1.648677 | 1.363019 | 1.090701 | -2.55592 | 0.13527  | 86.68171 | 8.47E-15 | 5.95E-14 |
| LOC114300861 | 0.928704 | 1.713199 | 1.085538 | 0        | 0        | 0        | 8.593634 | 0.094468 | 131.2765 | 4.99E-14 | 3.28E-13 |
| LOC114300920 | 4.746637 | 3.586123 | 4.374146 | 8.628538 | 7.582781 | 8.67031  | -1.06658 | 2.646044 | 104.0819 | 1.21E-16 | 9.86E-16 |
| LOC114300943 | 0.141251 | 0.053016 | 0.129332 | 1.840175 | 2.0891   | 2.103129 | -4.2684  | 0.468276 | 216.324  | 1.46E-25 | 2.48E-24 |
| LOC114300976 | 0.392558 | 0.126291 | 0.287546 | 0.747581 | 0.749153 | 0.822143 | -1.59815 | -0.16914 | 31.34567 | 2.36E-07 | 8.27E-07 |
| LOC114301120 | 0        | 0        | 0        | 1.780135 | 1.721989 | 1.691996 | -8.68532 | -0.07565 | 208.1061 | 8.29E-25 | 1.32E-23 |
| LOC114301118 | 0.103552 | 0.116599 | 0.037925 | 15.68651 | 13.78375 | 13.14099 | -7.3701  | 2.674599 | 1315.742 | 3.81E-55 | 5.91E-53 |
| LOC114301125 | 0        | 0        | 0        | 1.403488 | 1.137561 | 1.123554 | -8.47107 | -0.27874 | 176.2166 | 1.24E-22 | 1.65E-21 |
| LOC114301241 | 0.827843 | 0.652505 | 0.795888 | 0.150487 | 0.088866 | 0.199113 | 2.24695  | -0.38869 | 39.65906 | 1.12E-08 | 4.51E-08 |
| LOC114301286 | 1.266673 | 1.238604 | 0.805748 | 3.514473 | 2.146948 | 2.565559 | -1.38202 | 0.831671 | 48.03901 | 7.66E-10 | 3.47E-09 |
| LOC114301318 | 0.976068 | 0.841825 | 0.810039 | 2.41609  | 2.586005 | 2.797185 | -1.67494 | 2.362056 | 202.5848 | 1.14E-24 | 1.8E-23  |
| LOC114301412 | 0.04806  | 0        | 0        | 1.659918 | 1.926052 | 2.113708 | -6.37648 | -0.66571 | 121.7831 | 2.36E-18 | 2.22E-17 |
| LOC114301439 | 0.524278 | 0.646558 | 0.603477 | 0.226915 | 0.202487 | 0.217314 | 1.345557 | 0.637237 | 38.45759 | 1.71E-08 | 6.79E-08 |
| LOC114301455 | 0.965341 | 0.852855 | 1.06066  | 1.970795 | 1.721791 | 1.959529 | -1.07258 | 1.559161 | 53.76541 | 9.9E-11  | 4.86E-10 |
| LOC114301478 | 0.154909 | 0.124591 | 0.11347  | 0.402281 | 0.348417 | 0.405537 | -1.6422  | 0.137399 | 43.75327 | 2.68E-09 | 1.15E-08 |
| LOC114301542 | 3.462977 | 3.521953 | 4.142451 | 1.015335 | 0.959328 | 1.074729 | 1.754538 | 1.399613 | 104.9794 | 9.84E-17 | 8.07E-16 |
| LOC114301541 | 0        | 0.0291   | 0        | 1.832174 | 1.664529 | 1.172136 | -6.94623 | -0.11393 | 181.6712 | 3.2E-23  | 4.52E-22 |
| LOC114301557 | 2.198795 | 2.588377 | 2.635536 | 0        | 0        | 0        | 8.257369 | -0.20888 | 126.8451 | 1.11E-18 | 1.07E-17 |
| LOC114301660 | 1.803155 | 1.952258 | 1.524001 | 0.756418 | 0.397052 | 0.857858 | 1.287802 | 0.20271  | 24.72794 | 3.18E-06 | 9.8E-06  |

|              |          |          |          |          |          |          |          |          |          |          |          |
|--------------|----------|----------|----------|----------|----------|----------|----------|----------|----------|----------|----------|
| LOC114301754 | 1.046206 | 0.961021 | 1.210011 | 2.802676 | 2.581089 | 3.046089 | -1.49477 | 2.113613 | 140.5742 | 5.12E-20 | 5.49E-19 |
| LOC114301756 | 5.093654 | 4.931409 | 5.125868 | 1.903792 | 1.975931 | 1.930104 | 1.274324 | 2.165661 | 102.1841 | 1.89E-16 | 1.52E-15 |
| LOC114301765 | 2.013728 | 2.006452 | 2.40358  | 0.816392 | 0.953832 | 0.77654  | 1.223001 | 1.673293 | 66.75092 | 1.93E-12 | 1.1E-11  |
| LOC114301786 | 0.304151 | 0.418579 | 0.284675 | 1.126262 | 1.531713 | 1.424382 | -2.14061 | 1.218165 | 141.9936 | 3.88E-20 | 4.2E-19  |
| LOC114301781 | 1.616515 | 1.353476 | 2.049383 | 0.226041 | 0.593257 | 0.341806 | 1.948648 | -0.22794 | 35.24945 | 5.48E-08 | 2.06E-07 |
| LOC114301794 | 0.758393 | 1.081669 | 1.277693 | 4.043962 | 2.677522 | 2.710072 | -1.67702 | 0.357113 | 49.96503 | 3.36E-10 | 1.58E-09 |
| LOC114301859 | 2.395903 | 2.471976 | 2.412139 | 0.191864 | 0.075534 | 0.101544 | 4.242547 | 1.892531 | 449.6683 | 1.4E-36  | 5.52E-35 |
| LOC114301884 | 1.008328 | 0.349346 | 0.894836 | 1.127975 | 1.720752 | 1.492449 | -1.04884 | -0.12576 | 14.17055 | 0.000313 | 0.000733 |
| LOC114301913 | 7.432629 | 6.907048 | 5.657542 | 1.139498 | 1.922577 | 2.338466 | 1.740829 | 1.556652 | 105.4412 | 3.06E-16 | 2.41E-15 |
| LOC114301965 | 1.605473 | 1.355819 | 1.356923 | 0        | 0        | 0        | 8.180434 | -0.28084 | 120.1376 | 4.48E-18 | 4.11E-17 |
| LOC114301956 | 0.024499 | 0        | 0.080753 | 1.870444 | 1.893504 | 2.053937 | -5.74932 | 0.304193 | 232.5354 | 1.44E-26 | 2.64E-25 |
| LOC114302045 | 7.276782 | 6.765272 | 7.437787 | 3.563774 | 3.499242 | 2.678612 | 1.046177 | 3.759873 | 204.6991 | 3.43E-22 | 4.41E-21 |
| LOC114302047 | 3.073199 | 2.748645 | 3.03677  | 0.904602 | 0.750753 | 0.730154 | 1.801844 | 3.067072 | 353.3015 | 9.33E-33 | 2.7E-31  |
| LOC114302116 | 5.022248 | 4.9916   | 5.055738 | 1.581095 | 1.766957 | 0.848361 | 1.755615 | 1.817467 | 126.4357 | 3.76E-18 | 3.48E-17 |
| LOC114302211 | 0        | 0.014155 | 0        | 0.548459 | 0.359865 | 0.431951 | -6.18538 | -0.82889 | 103.5644 | 1.37E-16 | 1.11E-15 |
| LOC114302209 | 3.472831 | 3.06816  | 2.993892 | 12.52885 | 12.00599 | 11.6022  | -2.01771 | 2.129086 | 244.9732 | 2.64E-27 | 5.07E-26 |
| LOC114302254 | 17.37288 | 17.57102 | 19.17277 | 5.030568 | 6.711526 | 6.339101 | 1.456698 | 2.256262 | 133.2394 | 2.2E-19  | 2.25E-18 |
| LOC114302332 | 1.47232  | 1.282055 | 1.035328 | 0        | 0        | 0        | 8.645074 | 0.129989 | 163.945  | 9.99E-22 | 1.24E-20 |
| LOC114302368 | 1.648205 | 1.412079 | 1.968426 | 0        | 0.102568 | 0.049245 | 4.709643 | -0.24449 | 97.26637 | 6.1E-16  | 4.69E-15 |
| LOC114302657 | 1.125623 | 0.768781 | 1.439518 | 0        | 0        | 0        | 8.546537 | 0.042032 | 142.9788 | 1.92E-18 | 1.82E-17 |
| LOC114302682 | 0.80127  | 0.676671 | 0.597407 | 3.277274 | 2.41658  | 3.146474 | -2.17297 | 0.966662 | 124.7566 | 1.26E-18 | 1.21E-17 |
| LOC114302843 | 0.866854 | 0.325358 | 0.952448 | 2.02601  | 2.008786 | 1.645272 | -1.47875 | -0.00164 | 30.20358 | 3.82E-07 | 1.31E-06 |
| LOC114302931 | 0.279272 | 0.581751 | 0.5063   | 0        | 0        | 0        | 7.645052 | -0.7319  | 75.23729 | 5.75E-13 | 3.44E-12 |
| LOC114302938 | 0.730276 | 1.168516 | 1.013538 | 1.886463 | 1.705388 | 1.954556 | -1.04189 | 0.213522 | 19.32058 | 3.04E-05 | 8.25E-05 |
| LOC114303121 | 1.318087 | 0.981831 | 1.114028 | 0.184311 | 0.261217 | 0.139352 | 2.428153 | 0.138416 | 66.50194 | 2.08E-12 | 1.18E-11 |
| LOC114303176 | 0.191411 | 0.153948 | 0.060089 | 0.994143 | 0.900168 | 0.977134 | -2.86961 | -0.64689 | 58.95875 | 1.96E-11 | 1.03E-10 |



|              |          |          |          |          |          |          |          |          |          |          |          |
|--------------|----------|----------|----------|----------|----------|----------|----------|----------|----------|----------|----------|
| LOC114303181 | 0.069915 | 0.118087 | 0.038409 | 3.495071 | 3.552455 | 4.131937 | -5.64552 | 0.735242 | 322.6799 | 2.3E-31  | 6.04E-30 |
| LOC114303180 | 0.124725 | 0.224704 | 0.411121 | 5.396108 | 5.819668 | 6.171178 | -4.62614 | 1.898513 | 583.4955 | 2.34E-40 | 1.21E-38 |
| LOC114303183 | 2.268389 | 2.060776 | 1.897603 | 3.795519 | 4.021513 | 4.215945 | -1.05646 | 1.860601 | 63.48205 | 5.03E-12 | 2.77E-11 |
| LOC114303196 | 1.119826 | 2.063325 | 1.677817 | 4.996578 | 2.914176 | 3.777762 | -1.34995 | -0.21791 | 22.11609 | 9.32E-06 | 2.7E-05  |
| LOC114303195 | 0.848445 | 1.201889 | 0.811935 | 2.686625 | 2.702958 | 3.122146 | -1.6867  | 1.097841 | 88.40316 | 5.46E-15 | 3.9E-14  |
| LOC114303232 | 0.975624 | 0.798946 | 0.779607 | 0.403071 | 0.206287 | 0.335224 | 1.358149 | 0.746269 | 40.67599 | 7.8E-09  | 3.2E-08  |
| LOC114303265 | 2.99285  | 2.631325 | 3.108184 | 0.260844 | 0.23472  | 0.338085 | 3.259537 | 1.28996  | 233.5696 | 1.25E-26 | 2.3E-25  |
| LOC114303286 | 2.503845 | 2.819324 | 3.16694  | 1.111423 | 1.166797 | 0.760284 | 1.383311 | 1.055701 | 52.84425 | 1.33E-10 | 6.45E-10 |
| LOC114303353 | 5.742316 | 5.04951  | 5.94879  | 0        | 0.078276 | 0.075164 | 6.354228 | 0.741364 | 252.5757 | 9.65E-28 | 1.92E-26 |
| LOC114303362 | 0        | 0        | 0        | 3.582918 | 3.25508  | 3.646644 | -9.26087 | 0.491366 | 316.3359 | 9.75E-31 | 2.45E-29 |
| LOC114303380 | 0.765108 | 0.894645 | 0.969988 | 1.55131  | 1.811115 | 2.507577 | -1.28924 | 0.59409  | 37.60676 | 2.32E-08 | 9.1E-08  |
| LOC114303387 | 1.887275 | 2.125067 | 2.833958 | 1.029219 | 0.900414 | 0.951086 | 1.136633 | -0.20519 | 14.74735 | 0.00023  | 0.000548 |
| LOC114303474 | 0.467589 | 0.760505 | 0.761125 | 1.794429 | 1.958192 | 1.832753 | -1.60768 | 1.170178 | 83.72623 | 1.82E-14 | 1.24E-13 |
| LOC114303507 | 7.861988 | 8.210281 | 9.333173 | 0.338131 | 0.425973 | 0.357911 | 4.377523 | 3.406498 | 1436.188 | 2.71E-56 | 4.73E-54 |
| LOC114303508 | 1.678283 | 1.464125 | 1.628035 | 3.353151 | 2.510315 | 3.179411 | -1.01632 | 2.221071 | 70.9073  | 5.88E-13 | 3.52E-12 |
| LOC114303528 | 0.165455 | 0.232877 | 0.22724  | 4.774686 | 3.96664  | 4.377475 | -4.47738 | 1.762504 | 551.1138 | 6.36E-40 | 3.17E-38 |
| LOC114303559 | 1.772558 | 1.330598 | 1.839385 | 3.580216 | 3.594151 | 2.774565 | -1.09629 | 0.651979 | 29.20034 | 5.39E-07 | 1.81E-06 |
| LOC114303550 | 9.161511 | 8.337062 | 8.930322 | 1.550301 | 1.276139 | 1.331972 | 2.574306 | 3.556044 | 920.8099 | 9.38E-49 | 8.85E-47 |
| LOC114303638 | 0        | 0        | 0        | 5.490499 | 4.121963 | 3.571963 | -8.67734 | -0.07411 | 199.5721 | 2.99E-24 | 4.57E-23 |
| LOC114303675 | 1.254255 | 1.376982 | 1.033577 | 0.456003 | 0.583442 | 0.301673 | 1.343718 | -0.15602 | 20.43618 | 1.89E-05 | 5.27E-05 |
| LOC114303701 | 1.209261 | 0.883217 | 1.292756 | 2.732924 | 2.105034 | 2.1112   | -1.11622 | 0.710708 | 31.35215 | 2.36E-07 | 8.25E-07 |
| LOC114303850 | 0.761304 | 0.598065 | 0.778118 | 0.321841 | 0.304088 | 0.340668 | 1.035878 | -0.03965 | 14.47696 | 0.00026  | 0.000615 |
| LOC114303856 | 14.97999 | 16.30736 | 15.30255 | 2.964913 | 2.980179 | 3.036604 | 2.267708 | 4.568943 | 1341.443 | 1.7E-55  | 2.74E-53 |
| LOC114303935 | 1.26321  | 1.179231 | 1.221863 | 2.315916 | 2.147991 | 2.581974 | -1.04868 | 2.341151 | 84.26677 | 1.58E-14 | 1.08E-13 |
| LOC114304082 | 1.295136 | 1.069435 | 1.517887 | 9.103391 | 8.403516 | 9.671518 | -2.90515 | 1.880518 | 364.0337 | 3.2E-33  | 9.56E-32 |
| LOC114304186 | 1.516324 | 0.589821 | 1.575173 | 3.658502 | 3.590862 | 3.410239 | -1.61909 | 1.415792 | 72.76426 | 8.23E-10 | 3.71E-09 |

|                                      |          |          |          |          |          |          |          |          |          |          |          |
|--------------------------------------|----------|----------|----------|----------|----------|----------|----------|----------|----------|----------|----------|
| LOC114304288                         | 0.065974 | 0.037143 | 0.072488 | 8.005221 | 8.309629 | 8.591384 | -7.18335 | 2.971405 | 1717.431 | 5.15E-60 | 1.2E-57  |
| LOC114304457                         | 2.240012 | 1.921713 | 2.461194 | 0.096951 | 0.610688 | 0.513112 | 2.230706 | -0.23744 | 42.71782 | 3.83E-09 | 1.62E-08 |
| LOC114304586                         | 4.582853 | 5.104795 | 4.981228 | 0.850996 | 0.88164  | 0.541821 | 2.593636 | 1.820025 | 245.7537 | 2.38E-27 | 4.59E-26 |
| LOC114304835                         | 0.100445 | 0.084826 | 0.110363 | 1.82591  | 1.150128 | 1.380515 | -3.90464 | -0.08013 | 130.1068 | 4.15E-19 | 4.14E-18 |
| LOC114304846                         | 1.419029 | 1.691813 | 0.917145 | 3.186491 | 4.53998  | 5.39204  | -1.82901 | 0.116994 | 49.59804 | 3.79E-10 | 1.77E-09 |
| LOC114304851                         | 1.905675 | 2.056378 | 2.311954 | 0        | 0        | 0        | 8.347871 | -0.13004 | 135.5788 | 1.91E-19 | 1.97E-18 |
| LOC114304912                         | 3.456171 | 2.91873  | 4.034779 | 10.20939 | 7.883943 | 10.09409 | -1.52998 | 0.880502 | 64.43483 | 3.8E-12  | 2.11E-11 |
| LOC114304973                         | 11.52462 | 11.71719 | 11.95496 | 24.33862 | 23.77233 | 23.47963 | -1.12882 | 4.004017 | 326.7553 | 1.48E-31 | 3.93E-30 |
| LOC114305026                         | 1.044628 | 0.693685 | 0.824044 | 2.239783 | 1.495167 | 1.840687 | -1.19261 | 0.65329  | 33.66031 | 9.87E-08 | 3.61E-07 |
| LOC114305046                         | 0        | 0        | 0        | 1.871274 | 2.009153 | 1.607743 | -8.0236  | -0.70542 | 127.0584 | 1.06E-18 | 1.03E-17 |
| LOC114305241                         | 3.858992 | 3.889237 | 3.873613 | 1.688786 | 1.261504 | 1.27684  | 1.372172 | 1.772166 | 88.28825 | 5.63E-15 | 4.01E-14 |
| LOC114305266                         | 1.814246 | 1.564047 | 2.180268 | 3.813283 | 3.529909 | 3.584405 | -1.07436 | 1.576724 | 53.78635 | 9.83E-11 | 4.83E-10 |
| LOC114305267                         | 1.832806 | 1.820943 | 1.895323 | 3.38071  | 3.356255 | 3.630335 | -1.00865 | 1.600405 | 49.97676 | 3.35E-10 | 1.57E-09 |
| LOC114305329                         | 0.533765 | 0.47353  | 0.58647  | 0.911485 | 1.134386 | 1.133757 | -1.11172 | 0.624536 | 30.16198 | 3.72E-07 | 1.27E-06 |
| 6cb30582-c25f-49c1-861d-f29a2e8835a8 | 3.51924  | 2.641771 | 3.061165 | 1.332781 | 1.154326 | 1.309978 | 1.179126 | -0.01993 | 18.5573  | 4.23E-05 | 0.000113 |
| dc79016c-760e-496f-9f14-656b71806154 | 21.59097 | 19.13201 | 20.00975 | 44.36791 | 42.32364 | 46.1892  | -1.23231 | 3.394524 | 268.9813 | 1.19E-28 | 2.53E-27 |
| 16c27210-ce36-4198-89eb-06be9cd6fc84 | 8.775718 | 7.857529 | 5.924754 | 4.036222 | 2.118657 | 2.470396 | 1.327018 | 0.653088 | 35.23698 | 5.85E-08 | 2.2E-07  |
| 7d53e301-f6fc-4680-9940-df41b954a4af | 35.64522 | 34.24735 | 38.10399 | 14.84618 | 14.91405 | 13.87888 | 1.203054 | 4.231418 | 370.1287 | 1.76E-33 | 5.34E-32 |
| 518b828f-8b02-4e68-9b9c-d256fc83a688 | 1.971926 | 1.526514 | 1.692685 | 0.168029 | 0.0882   | 0.042347 | 4.043391 | 0.017142 | 107.9273 | 5E-17    | 4.19E-16 |
| 283aced0-12bb-4f33-97a8-5b35cf7b31ca | 2.204889 | 1.576318 | 1.615069 | 0.827067 | 0.75139  | 0.865828 | 1.041995 | 0.285589 | 18.41281 | 4.51E-05 | 0.000119 |
| df848b9b-164e-41a2-8ac3-3fcad113afce | 3.171946 | 3.571604 | 3.48515  | 15.9486  | 15.06887 | 17.53084 | -2.35583 | 3.158869 | 668.4223 | 3.49E-43 | 2.21E-41 |
| 0158bf7-54d4-45dc-a7e8-fa80052b3df8  | 21.35287 | 14.15633 | 19.51453 | 7.255272 | 5.426929 | 4.662668 | 1.591993 | 0.937404 | 60.2898  | 1.36E-11 | 7.24E-11 |
| 5570d83e-1d59-4263-add5-5f9728d529fa | 2.856255 | 3.135733 | 2.746001 | 1.427844 | 1.430847 | 0.490704 | 1.308438 | -0.08579 | 19.95905 | 2.32E-05 | 6.37E-05 |
| 82dc2950-3b19-4450-a42c-26594971e36e | 29.28113 | 28.51044 | 31.84186 | 3.828031 | 4.664621 | 4.617031 | 2.651643 | 3.351096 | 824.0578 | 8.37E-47 | 6.69E-45 |
| a8eca831-549e-45fd-90d0-fb867bf3674f | 29.28113 | 28.51044 | 31.84186 | 3.828031 | 4.664621 | 4.617031 | 2.651643 | 3.351096 | 824.0578 | 8.37E-47 | 6.69E-45 |
| 0e28f1b2-fa13-4238-bf50-87589a5d4b01 | 1.889559 | 1.791696 | 2.513218 | 3.97723  | 3.416222 | 4.237225 | -1.01047 | -0.06507 | 15.02015 | 0.000203 | 0.000488 |

|                                      |          |          |          |          |          |          |          |          |          |          |          |
|--------------------------------------|----------|----------|----------|----------|----------|----------|----------|----------|----------|----------|----------|
| 9b7b08eb-13a4-44fa-96c8-6539acac5b75 | 2.754741 | 2.215594 | 3.27383  | 9.402074 | 9.655927 | 10.43113 | -1.94357 | 1.781955 | 181.0386 | 3.55E-23 | 4.99E-22 |
| 3c79b2c6-2028-4086-843a-2daa77d7c260 | 0.201562 | 0        | 0        | 5.129647 | 5.625627 | 5.263503 | -6.03138 | -0.26744 | 157.0961 | 2.27E-21 | 2.73E-20 |
| 63c7eb22-bf11-4d89-98a5-b27a0efbc26b | 2.522804 | 1.893781 | 2.617915 | 9.426791 | 6.619924 | 8.186777 | -1.8656  | 1.190987 | 110.8671 | 2.57E-17 | 2.2E-16  |
| 9b550364-379b-4d71-91db-27707e72e9d4 | 1.542265 | 1.46942  | 1.629376 | 3.127051 | 4.414862 | 4.076325 | -1.44286 | 0.518757 | 45.31036 | 1.58E-09 | 6.92E-09 |
| 159f4286-4344-4b8e-82d1-03de4ee701fb | 2.983514 | 1.455753 | 2.403948 | 0.813524 | 0.854056 | 1.435189 | 1.015896 | 0.139523 | 14.39992 | 0.000289 | 0.000679 |
| 06539777-f5c4-4a7b-901b-f91387a06c49 | 2.251059 | 2.131441 | 2.473332 | 0.837005 | 0.366127 | 0.984408 | 1.540814 | -0.02133 | 28.55242 | 6.94E-07 | 2.31E-06 |
| 77c70521-1fc0-408f-959f-8ec42f8edb3  | 1.754497 | 1.382892 | 1.493998 | 0.159468 | 0.502239 | 0.421992 | 1.916175 | -0.39562 | 30.69597 | 3.03E-07 | 1.05E-06 |
| 8586b7ad-23cd-4a37-b0e5-1aa8f8891b6d | 4.939916 | 3.003661 | 3.582277 | 0.538793 | 0.141409 | 0.950519 | 2.679889 | -0.3597  | 48.43801 | 6.13E-10 | 2.8E-09  |
| 1f8607b8-a5ce-49a0-ab17-7415b2a59937 | 0.980246 | 0.694957 | 0.518573 | 3.299837 | 3.221745 | 2.744398 | -2.15239 | 0.699435 | 100.4874 | 2.82E-16 | 2.23E-15 |
| b25d78b9-8b2e-402d-b591-c882c8490d69 | 1.061454 | 0.796796 | 1.036679 | 1.286355 | 2.194472 | 2.107245 | -1.07437 | -0.3465  | 13.49935 | 0.000407 | 0.000935 |
| f587218d-460c-4721-bc9d-8703401d683f | 0.986043 | 0.621758 | 0.953398 | 1.505659 | 2.032295 | 2.005723 | -1.22405 | 0.124959 | 24.68461 | 3.24E-06 | 9.97E-06 |
| 4e0a5493-77b7-4639-bb7f-25e001aaca86 | 3.775113 | 2.65673  | 3.925666 | 1.838164 | 0.771898 | 1.575085 | 1.231661 | 0.232679 | 22.77052 | 7.17E-06 | 2.11E-05 |
| 4bc6d04b-9133-4fc2-8cb6-c0d28d06e67f | 3.775113 | 2.65673  | 3.925666 | 1.838164 | 0.771898 | 1.575085 | 1.231661 | 0.232679 | 22.77052 | 7.17E-06 | 2.11E-05 |
| 95f54466-ff67-4add-8a09-d726d270b4d2 | 3.775113 | 2.65673  | 3.925666 | 1.838164 | 0.771898 | 1.575085 | 1.231661 | 0.232679 | 22.77052 | 7.17E-06 | 2.11E-05 |
| 5e1fe58f-1fd3-4034-a05f-a5992c6950c4 | 3.775113 | 2.65673  | 3.925666 | 1.838164 | 0.771898 | 1.575085 | 1.231661 | 0.232679 | 22.77052 | 7.17E-06 | 2.11E-05 |
| 4bae2af4-ebaa-4843-8fab-e9a07611db85 | 3.775113 | 2.65673  | 3.925666 | 1.838164 | 0.771898 | 1.575085 | 1.231661 | 0.232679 | 22.77052 | 7.17E-06 | 2.11E-05 |
| 6f7576fa-081b-4041-947b-a74ecaa95839 | 13.01219 | 9.639273 | 12.79208 | 5.602224 | 2.940669 | 4.706302 | 1.336412 | -0.30835 | 18.14887 | 5.05E-05 | 0.000133 |
| d7e3c713-f14e-4981-a79d-6a6e4c58abdf | 1.696965 | 1.558305 | 1.918833 | 0.509138 | 0.589527 | 0.611382 | 1.475426 | 1.132354 | 64.7945  | 3.42E-12 | 1.91E-11 |
| 3890e7ac-2a72-4fe8-a613-14cf0d99521f | 5.787482 | 5.604355 | 5.553481 | 0.490962 | 0.441791 | 0.742403 | 3.201288 | 1.33609  | 236.7925 | 8E-27    | 1.49E-25 |
| cb223cbe-15a0-4018-99cf-84f2b780c7f0 | 0.559913 | 1.260921 | 0.223709 | 16.10009 | 17.4122  | 15.04109 | -4.67569 | 2.352024 | 479.9653 | 3.11E-16 | 2.44E-15 |
| d7b89a32-b460-494f-88e8-9e5db57a021f | 13.8024  | 12.21963 | 12.84997 | 29.20818 | 21.2633  | 24.68999 | -1.04035 | 3.460885 | 169.9539 | 2.62E-19 | 2.66E-18 |
| 46a45240-6692-40ee-b497-19fa0be66da7 | 8.022044 | 7.37767  | 7.645807 | 0.59695  | 0.559546 | 0.38686  | 3.811408 | 2.973312 | 902.5061 | 2.12E-48 | 1.93E-46 |
| 59cf3db3-c7aa-4419-8d82-e5c62b34fc92 | 3.221397 | 4.760813 | 5.014269 | 1.951975 | 1.056632 | 0.737915 | 1.738227 | 0.428605 | 44.97034 | 2.81E-09 | 1.2E-08  |
| 5560a092-b25a-47d9-9934-9f48df416f2c | 12.70162 | 12.77316 | 15.15888 | 3.264345 | 2.068726 | 4.093388 | 1.997276 | 2.528622 | 228.3236 | 4.24E-22 | 5.4E-21  |
| 71d132de-3a3f-437e-ad2e-b004b1b8abe7 | 16.99838 | 12.18009 | 14.71508 | 0        | 0        | 0        | 8.467092 | -0.03    | 145.613  | 2.77E-20 | 3.04E-19 |
| efb50ecd-96fb-4c7c-93ee-906a105a5526 | 16.99838 | 12.18009 | 14.71508 | 0        | 0        | 0        | 8.467092 | -0.03    | 145.613  | 2.77E-20 | 3.04E-19 |

|                                      |          |          |          |          |          |          |          |          |          |          |          |
|--------------------------------------|----------|----------|----------|----------|----------|----------|----------|----------|----------|----------|----------|
| 2e9c23ca-d3d6-4637-9e0d-af0aff00b61f | 16.99838 | 12.18009 | 14.71508 | 0        | 0        | 0        | 8.467092 | -0.03    | 145.613  | 2.77E-20 | 3.04E-19 |
| 31c9ef94-05ab-471d-9dc9-2f73c4901e94 | 6.086566 | 4.774951 | 6.002362 | 0.317418 | 0.249924 | 0.274275 | 4.217757 | 1.864038 | 438.5013 | 3.58E-36 | 1.36E-34 |
| 9e7ead4c-14dc-4cf0-8708-31c34439baeb | 1.177089 | 0.92778  | 0.905322 | 4.065503 | 3.790706 | 4.125368 | -2.07896 | 0.399524 | 80.19584 | 4.61E-14 | 3.04E-13 |
| 90b49ba3-888b-4a08-92a8-72e68c70d221 | 0.156132 | 0.175804 | 0        | 5.960224 | 7.374527 | 6.330342 | -5.83794 | 0.389419 | 249.2133 | 1.5E-27  | 2.94E-26 |
| 50da94d5-b026-4ea9-852e-7b1d243c6430 | 0.946893 | 0.878047 | 0.795593 | 5.568857 | 5.181955 | 5.20564  | -2.69136 | 0.773193 | 157.3066 | 2.19E-21 | 2.63E-20 |
| cc4ea2e-b9d7-4958-ac98-6c361675af30  | 2.385721 | 2.479677 | 1.693757 | 0.400321 | 0.682932 | 0.252226 | 2.176905 | 0.249159 | 58.48615 | 2.57E-11 | 1.33E-10 |
| f473cb14-4171-475d-85d0-cd5784de6358 | 7.441661 | 8.320285 | 7.543076 | 2.095827 | 1.875209 | 2.232833 | 1.798001 | 1.543197 | 121.3508 | 2.59E-18 | 2.42E-17 |
| 96248ff1-4b5e-4cff-aa05-f585da0c890b | 15.11226 | 14.04363 | 15.40415 | 0        | 0.456055 | 0.062561 | 6.176378 | 2.324939 | 673.2405 | 4.09E-36 | 1.55E-34 |
| c797f8d6-d492-402c-87c1-4baf6504b5db | 42.81483 | 44.38327 | 41.93498 | 17.02371 | 17.11963 | 17.31715 | 1.221766 | 6.04176  | 1164.132 | 6.19E-53 | 8.24E-51 |
| 8eceec7f-4baa-4e64-964d-c8860a1f399b | 17.72558 | 18.58679 | 17.7717  | 0        | 0        | 0        | 9.974833 | 1.354557 | 438.1374 | 9.68E-36 | 3.53E-34 |
| cff198cf-b9dc-4971-9124-3261614341ff | 16.96492 | 16.43079 | 17.01069 | 33.10361 | 34.30008 | 32.03991 | -1.08498 | 3.685665 | 256.5359 | 5.76E-28 | 1.17E-26 |
| 17ec6f48-9044-4c13-bc19-861fda3af104 | 2.334074 | 2.291218 | 2.367271 | 5.276463 | 5.5679   | 5.223201 | -1.30507 | 1.980313 | 103.1331 | 1.51E-16 | 1.22E-15 |
| 23aaf7eb-6764-401f-be06-4557fea907de | 84.10886 | 75.13125 | 78.86108 | 216.7014 | 206.2884 | 213.5627 | -1.52295 | 5.753973 | 1550.479 | 3.88E-58 | 7.97E-56 |
| 6888e84e-b9fa-4668-9a0c-a44203e904ac | 0.890414 | 1.055373 | 1.1843   | 1.874184 | 1.878125 | 2.061112 | -1.0045  | 0.022    | 15.97738 | 0.000132 | 0.000326 |
| e3b59cb6-2684-4b9f-8915-c6c5247f3a88 | 3.575461 | 2.9043   | 3.146716 | 1.293443 | 1.55308  | 1.197968 | 1.145369 | 1.975537 | 70.83308 | 6E-13    | 3.58E-12 |
| a06fd179-3fc2-457f-bf85-bf6ec7fdc964 | 3.734215 | 3.290648 | 3.995904 | 17.82623 | 16.68491 | 17.00355 | -2.32436 | 3.303637 | 753.1385 | 3.08E-45 | 2.2E-43  |
| 3e1515fa-8a47-450b-9ba3-4575ea22ec2c | 0.285579 | 0.388091 | 0.357057 | 0.107406 | 0.225515 | 0.040603 | 1.339089 | -0.30235 | 16.39015 | 0.000122 | 0.000304 |
| 0d7c8a77-4c24-400b-9df9-61831dbe3d6c | 15.21666 | 13.58898 | 13.42476 | 50.14439 | 49.4598  | 47.08175 | -1.89596 | 3.689828 | 703.9623 | 4.51E-44 | 3.02E-42 |
| b5ebc10d-d8c5-498c-8fe9-92a134075f2b | 1.983539 | 1.927507 | 1.731576 | 7.359619 | 8.478177 | 7.20756  | -2.134   | 2.435931 | 317.0308 | 4.26E-31 | 1.1E-29  |
| 78620b32-abdc-4c0f-8242-b2124321d4ad | 8.426386 | 6.49728  | 7.748896 | 4.162409 | 2.490779 | 3.398837 | 1.094035 | 0.911714 | 31.41779 | 2.3E-07  | 8.06E-07 |
| c7df1e10-2b65-41f0-add0-95b5baced524 | 6.807133 | 6.786048 | 5.907203 | 2.837385 | 3.040807 | 2.383624 | 1.137819 | 1.7203   | 60.31989 | 1.3E-11  | 6.89E-11 |
| fb7f254a-c769-49b5-843c-9418d6e7ea71 | 1.115481 | 1.046691 | 1.12349  | 0.056326 | 0.066524 | 0.042587 | 4.157383 | 0.30729  | 143.0023 | 3.19E-20 | 3.48E-19 |
| ee9ae06a-945f-4092-9025-a3d561d2626c | 4.598468 | 3.715879 | 4.993087 | 1.081778 | 1.393782 | 1.115318 | 1.770919 | 0.739946 | 65.3621  | 2.89E-12 | 1.63E-11 |
| 331e279d-f6d4-4ebe-9c41-51ca8ab55af6 | 0.524061 | 0.221284 | 0.215928 | 4.048757 | 4.594262 | 4.141546 | -3.76899 | 0.112853 | 146.1497 | 1.75E-20 | 1.94E-19 |
| 4a2a633b-dfe1-4f8a-9dfb-2117e2fbec17 | 0        | 0.074736 | 0        | 2.775062 | 2.564989 | 2.006917 | -6.24628 | -0.77457 | 109.0006 | 3.91E-17 | 3.31E-16 |
| a3f66198-9be1-4f34-a2b3-5ec33fbb8095 | 9.486469 | 6.911716 | 10.42318 | 22.31668 | 19.1688  | 29.91117 | -1.51453 | -0.09712 | 30.97997 | 2.72E-07 | 9.44E-07 |

|                                      |          |          |          |          |          |          |          |          |          |          |          |
|--------------------------------------|----------|----------|----------|----------|----------|----------|----------|----------|----------|----------|----------|
| b39907ae-91c1-4497-8428-6d54286c29ef | 4.872649 | 4.981248 | 4.578893 | 2.097854 | 1.560014 | 2.64354  | 1.081666 | 0.778919 | 28.44952 | 7.22E-07 | 2.4E-06  |
| ca37c006-7baa-4d8f-be80-cdef8802c201 | 4.872649 | 4.981248 | 4.578893 | 2.097854 | 1.560014 | 2.64354  | 1.081666 | 0.778919 | 28.44952 | 7.22E-07 | 2.4E-06  |
| d9c6517b-800e-48c7-a25b-8596ba413611 | 3.746756 | 2.244064 | 2.715282 | 1.304221 | 1.2551   | 1.095647 | 1.161455 | -0.19568 | 15.29644 | 0.000179 | 0.000434 |
| d67be7e9-f584-4458-89f4-35027b21d1e6 | 0.401929 | 0.502856 | 0.294411 | 0.040591 | 0.01598  | 0.138103 | 2.424483 | -0.44513 | 37.79713 | 3.15E-08 | 1.22E-07 |
| 03f7ae40-162d-42a5-9cb4-80ef2703a1c2 | 1.769201 | 2.056378 | 1.442245 | 3.112347 | 3.920892 | 4.157234 | -1.20742 | 0.592272 | 33.82705 | 9.28E-08 | 3.41E-07 |
| 18267fb3-aebd-4dd1-b4a4-0f344caf4684 | 3.787573 | 2.696858 | 2.876376 | 6.581376 | 5.500844 | 7.272585 | -1.14206 | 1.405977 | 52.52711 | 1.47E-10 | 7.1E-10  |
| f5b255f9-21b5-4ae3-98be-7fc2c2936cdb | 3.787573 | 2.696858 | 2.876376 | 6.581376 | 5.500844 | 7.272585 | -1.14206 | 1.405977 | 52.52711 | 1.47E-10 | 7.1E-10  |
| 7caf51c3-56d4-41b5-a59c-c40b98379d96 | 0.536957 | 0.633403 | 0.7164   | 0.162682 | 0.182986 | 0.105428 | 1.953781 | 0.028757 | 44.16586 | 2.33E-09 | 1E-08    |
| aa737109-4eda-4a6c-ae91-b1d2435f0441 | 4.635921 | 3.355738 | 6.549017 | 13.24286 | 9.163109 | 10.92276 | -1.28062 | 1.153922 | 50.70208 | 4.58E-10 | 2.12E-09 |
| 0122a589-5057-4ab6-85be-ae2f5fadf25c | 1.488073 | 1.04723  | 1.90751  | 2.592341 | 2.751078 | 3.40868  | -1.08958 | 0.172254 | 20.23446 | 2.06E-05 | 5.71E-05 |
| 7df55266-787a-4fce-8487-c70494f053b8 | 9.999454 | 8.977059 | 9.650582 | 5.035581 | 3.674737 | 3.807251 | 1.109449 | 1.648068 | 55.2068  | 6.28E-11 | 3.13E-10 |
| 4e382c5a-24d3-4f3d-b74c-be93ac9a04bf | 3.308425 | 2.919813 | 3.045628 | 6.826845 | 6.015136 | 7.250778 | -1.21352 | 0.767901 | 39.72151 | 1.09E-08 | 4.41E-08 |
| 7c103c27-da85-415d-b2b0-a34ff9d950bd | 3.308425 | 2.919813 | 3.045628 | 6.826845 | 6.015136 | 7.250778 | -1.21352 | 0.767901 | 39.72151 | 1.09E-08 | 4.41E-08 |
| a30e3a34-988f-44cb-ba93-9c072e21ccb1 | 3.308425 | 2.919813 | 3.045628 | 6.826845 | 6.015136 | 7.250778 | -1.21352 | 0.767901 | 39.72151 | 1.09E-08 | 4.41E-08 |
| 32f04872-0b42-425d-bf3c-328cdd0c8f21 | 6.315402 | 6.840228 | 5.881625 | 2.077383 | 1.721749 | 1.735977 | 1.684893 | 1.101556 | 79.26364 | 5.91E-14 | 3.86E-13 |
| 49f7a5b4-e6d3-4bca-9428-067fa63a4a9a | 1.907183 | 1.8407   | 1.257301 | 0.594329 | 0.701932 | 0.374462 | 1.482073 | -0.49116 | 18.49215 | 4.35E-05 | 0.000116 |
| db201d78-87c1-4b3a-9dbf-6756a91944ad | 3.461279 | 1.37555  | 2.460798 | 9.252922 | 8.451111 | 9.794196 | -1.98268 | -0.15008 | 47.6495  | 7.21E-10 | 3.27E-09 |
| 6c7f2e97-e2e7-4b2d-be88-3c28ef55c439 | 3.847981 | 4.637947 | 3.989744 | 0.788163 | 1.008431 | 0.819371 | 2.12521  | 0.58891  | 78.37758 | 7.5E-14  | 4.84E-13 |
| 0670f00f-1a6c-44c1-9275-c5d3dda86f5c | 3.611038 | 4.23427  | 4.432765 | 0.04527  | 0.213867 | 0.136911 | 4.738207 | 1.40973  | 342.4045 | 2.84E-32 | 7.97E-31 |
| d0fee097-1d4a-4210-acf7-4c4dfdc35dd  | 5.224758 | 5.335804 | 5.696158 | 2.135137 | 1.681135 | 2.449301 | 1.265448 | 1.523653 | 64.65928 | 3.56E-12 | 1.99E-11 |
| 12babea0-75b8-4563-a495-fcda34aca12a | 10.62772 | 11.16414 | 13.88439 | 23.32453 | 24.02284 | 22.08825 | -1.06808 | 3.047439 | 140.859  | 5.82E-20 | 6.22E-19 |
| 8ede44a7-61fa-4f63-b3bc-e447b1af3c24 | 20.73572 | 22.11951 | 22.25026 | 3.306477 | 3.644772 | 3.999883 | 2.450929 | 2.659273 | 417.3718 | 2.22E-35 | 7.85E-34 |
| 2eed8c0b-7c55-400f-86d0-eeb02fb07930 | 0.646428 | 1.399762 | 0.928798 | 38.59721 | 33.16583 | 33.8978  | -5.25797 | 3.494976 | 1994.703 | 4.2E-55  | 6.48E-53 |
| 139574f4-3c1e-4dfe-a2f9-d8b25af395e4 | 3.34129  | 2.368846 | 2.311506 | 0.674874 | 0.79706  | 0.680336 | 1.784541 | -0.10515 | 34.57743 | 7.02E-08 | 2.61E-07 |
| 225d45c3-669a-4bc8-b8c0-b97d52079ecc | 2.91269  | 2.893837 | 3.223825 | 1.129028 | 1.164842 | 1.5012   | 1.128471 | 1.627241 | 56.59791 | 4.07E-11 | 2.06E-10 |
| db071e6e-32af-4653-b9ab-cc8cf8461214 | 1.294798 | 1.52421  | 1.163986 | 4.49345  | 3.369516 | 3.397362 | -1.58024 | 0.422904 | 49.17228 | 4.36E-10 | 2.02E-09 |

|                                       |          |          |          |          |          |          |          |          |          |          |          |
|---------------------------------------|----------|----------|----------|----------|----------|----------|----------|----------|----------|----------|----------|
| 1fa930de-db9f-416e-9354-3f9eebe0e865  | 5.546198 | 6.101112 | 5.72877  | 1.393824 | 1.353522 | 1.791508 | 1.816296 | 2.127709 | 178.2005 | 5.7E-23  | 7.87E-22 |
| b314a9c9-70d7-47dd-9a63-c00d64c0399f  | 1.597707 | 1.840852 | 1.796292 | 0.067543 | 0.053181 | 0        | 5.231562 | -0.25067 | 104.8267 | 1.02E-16 | 8.35E-16 |
| 51f96671-0537-491d-9be9-f87f3a86cbb3  | 58.87191 | 45.55449 | 61.61938 | 16.73751 | 27.1558  | 14.57211 | 1.391223 | 2.039829 | 76.25751 | 3.06E-10 | 1.44E-09 |
| 953b6b22-fcc1-4d56-8d06-746f980e97e6  | 4.009858 | 3.755125 | 4.493042 | 0        | 0.056825 | 0.054566 | 6.364924 | 0.752158 | 254.0698 | 7.94E-28 | 1.59E-26 |
| 5ffb5ff6-d4ad-4eea-82b8-6950c8dba40d  | 4.599816 | 4.598023 | 4.074151 | 0.767906 | 0.537443 | 0.645101 | 2.667949 | 0.796066 | 127.2339 | 7.5E-19  | 7.34E-18 |
| 7ba5c5f7-e83d-4a2c-821c-f7a6dc3bc860  | 1.181705 | 0.90185  | 1.081991 | 2.625492 | 2.443083 | 2.472295 | -1.3471  | 2.060092 | 112.2269 | 1.89E-17 | 1.64E-16 |
| 4815e565-3c51-47b4-9360-4401849fa5d6  | 6.360631 | 6.445851 | 6.726615 | 16.04296 | 13.65588 | 16.06352 | -1.32947 | 2.069874 | 111.3079 | 2.33E-17 | 2.01E-16 |
| 29e9d69a-33f8-4cf5-8209-89dfc576e949  | 2.58287  | 2.262016 | 2.711778 | 0.626026 | 0.575064 | 0.946639 | 1.679703 | -0.0725  | 32.68381 | 1.42E-07 | 5.12E-07 |
| 94e4d0e7-73e5-4569-b0a4-bcc3283f5a47  | 1.989009 | 1.903677 | 1.748326 | 5.061929 | 2.989195 | 4.647279 | -1.24919 | -0.03854 | 22.4865  | 7.99E-06 | 2.34E-05 |
| 2613e1a7-f806-4cb7-8724-a0cbdffa4e372 | 3.644655 | 2.638204 | 3.575477 | 9.346451 | 7.079623 | 8.945024 | -1.45217 | 1.471422 | 86.28571 | 9.38E-15 | 6.54E-14 |
| 156f11de-5ca9-4610-a881-7101c2d4c769  | 0.693193 | 0.459137 | 0.627233 | 1.853089 | 1.867597 | 1.513149 | -1.63337 | -0.13745 | 34.9908  | 6.03E-08 | 2.26E-07 |
| bd6ab4d4-9e46-4d81-bcbb-4338984998e2  | 4.74772  | 4.364018 | 5.056829 | 1.497129 | 1.733513 | 2.197283 | 1.254627 | 1.087382 | 46.99729 | 8.96E-10 | 4.02E-09 |
| 15685811-db53-4445-92e0-64735bf0e4ed  | 1.729325 | 2.044577 | 1.710073 | 6.208618 | 6.435438 | 6.298477 | -1.89483 | 1.534624 | 151.2228 | 6.71E-21 | 7.73E-20 |
| 79d8701c-2e23-4aea-b78c-099ca9d52e6b  | 1.408679 | 1.379278 | 1.278597 | 3.785423 | 2.805191 | 4.12471  | -1.49214 | 0.331824 | 41.75222 | 5.35E-09 | 2.23E-08 |
| 546f12e7-0f62-4ded-b484-80000175953c  | 0.208536 | 0.091316 | 0.229127 | 0.505442 | 0.364804 | 0.557301 | -1.51229 | -0.15842 | 28.40979 | 7.34E-07 | 2.43E-06 |
| 3a3309e6-16e4-4a25-8389-d99c74ef82c0  | 0.322111 | 0.290157 | 0.442396 | 0.761202 | 0.576294 | 0.841148 | -1.14648 | 0.084999 | 20.99386 | 1.49E-05 | 4.22E-05 |
| a5169eda-4010-4966-a9e6-4a8b7d55f8c7  | 2.325877 | 2.398757 | 2.453769 | 0.767032 | 0.751236 | 0.76381  | 1.545655 | 2.225123 | 148.9854 | 1.02E-20 | 1.16E-19 |
| f457acee-70dc-4ab8-861f-40dd85635585  | 0.13666  | 0        | 0        | 5.341097 | 3.618601 | 4.31998  | -6.29707 | -0.00518 | 188.7625 | 1E-23    | 1.48E-22 |
| c3c9bad2-c043-43e0-ac47-4246fd447ba3  | 2.007378 | 2.054822 | 1.779511 | 0.414665 | 0.48974  | 0.438922 | 1.999978 | 0.753637 | 81.6618  | 3.13E-14 | 2.09E-13 |
| 61496c23-463f-463d-8331-2d903bd33aaf  | 1.293401 | 1.022555 | 1.148985 | 7.40369  | 6.971668 | 6.391975 | -2.67272 | 2.172156 | 386.7683 | 3.59E-34 | 1.16E-32 |
| 59d0b175-7f36-499c-9d47-e8393981f306  | 1.060762 | 0.575089 | 0.604335 | 1.49977  | 1.574491 | 2.105871 | -1.30447 | 0.00777  | 24.86893 | 3.01E-06 | 9.28E-06 |
| 48926cbc-0646-462a-86a9-a85fa7631689  | 1.865406 | 1.131008 | 1.497785 | 4.173509 | 3.183391 | 4.831804 | -1.52567 | 0.281398 | 41.00966 | 6.94E-09 | 2.86E-08 |
| f464f0c6-d4a8-4a01-8806-9a19ec50a98d  | 1.865406 | 1.131008 | 1.497785 | 4.173509 | 3.183391 | 4.831804 | -1.52567 | 0.281398 | 41.00966 | 6.94E-09 | 2.86E-08 |
| d37e0d95-be2a-4da3-9455-ce8b7e44b211  | 2.067205 | 1.25336  | 1.659814 | 4.624996 | 3.527768 | 5.354505 | -1.52567 | 0.281398 | 41.00966 | 6.94E-09 | 2.86E-08 |
| 2955b8c8-d65a-4c9e-87b7-dc5c98837b2a  | 1.257841 | 1.447116 | 1.081598 | 0.049707 | 0.078276 | 0.037582 | 4.305876 | -0.2478  | 92.57732 | 1.92E-15 | 1.42E-14 |
| 4dffcf49-6ff0-489d-985d-562c6c8e9080  | 0.501032 | 0.523864 | 0.314574 | 8.587415 | 7.581011 | 7.869921 | -4.24456 | 1.857882 | 556.3277 | 4.43E-40 | 2.24E-38 |

|                                      |          |          |          |          |          |          |          |          |          |          |          |
|--------------------------------------|----------|----------|----------|----------|----------|----------|----------|----------|----------|----------|----------|
| 1e0b853e-0c05-45d6-bbd2-618036d86b45 | 26.06897 | 24.56655 | 22.66293 | 0.934187 | 0.936151 | 1.41262  | 4.351404 | 4.013309 | 2046.914 | 7.23E-58 | 1.45E-55 |
| 03809cc1-23cb-4ebd-9176-935288925b94 | 3.630541 | 1.771458 | 2.526384 | 16.49919 | 15.58909 | 14.47046 | -2.6254  | 1.203407 | 193.0652 | 5.05E-24 | 7.57E-23 |
| fc9e74ae-c5b6-469a-ab56-08c9e7598298 | 4.643687 | 4.774104 | 3.32753  | 20.4612  | 17.98881 | 16.02508 | -2.18616 | 2.769124 | 381.7917 | 1.07E-30 | 2.68E-29 |
| 6e0ff7ce-3245-4120-8097-29746ee3a4db | 4.429787 | 4.310557 | 4.326393 | 0        | 0        | 0        | 8.946717 | 0.404153 | 211.0885 | 5.34E-25 | 8.65E-24 |
| 84855084-8dac-4962-b04d-5281cf693886 | 1.650074 | 1.238653 | 1.33817  | 2.928122 | 2.642896 | 2.753831 | -1.06681 | 0.730407 | 30.0088  | 3.94E-07 | 1.35E-06 |
| ef736e44-6cc3-4a90-9b01-2723f6c17370 | 6.182278 | 5.900911 | 6.072968 | 15.70382 | 13.82967 | 14.34911 | -1.37114 | 2.950995 | 221.4572 | 6.91E-26 | 1.2E-24  |
| 10966c86-8cda-4e26-b9d6-f351def181c7 | 4.405328 | 5.723527 | 5.241291 | 2.037564 | 2.425119 | 2.328724 | 1.057095 | 2.117302 | 65.63108 | 2.67E-12 | 1.51E-11 |
| b9366ac8-a399-4382-8169-379c6a0b5a0f | 2.502435 | 1.526274 | 2.291275 | 8.339797 | 6.715714 | 8.025141 | -1.94801 | 0.541322 | 77.66833 | 9.09E-14 | 5.83E-13 |
| 1b5644db-2550-4822-b9e6-d7e4d6575c79 | 2.502435 | 1.526274 | 2.291275 | 8.339797 | 6.715714 | 8.025141 | -1.94801 | 0.541322 | 77.66833 | 9.09E-14 | 5.83E-13 |
| 375ebaa4-b573-4600-b7b0-82ac492a5772 | 327.9208 | 328.3056 | 327.0538 | 847.3791 | 835.416  | 863.759  | -1.47804 | 8.754516 | 3651.935 | 2.04E-37 | 8.51E-36 |
| d2a1d879-9186-47c8-a28c-7c73733551b0 | 13.89651 | 10.45908 | 13.25964 | 2.792047 | 2.6171   | 2.513074 | 2.147605 | 1.682314 | 170.9455 | 1.96E-22 | 2.57E-21 |
| 2f2c25ed-e7b0-4bac-8468-896ffb4e547e | 13.89651 | 10.45908 | 13.25964 | 2.792047 | 2.6171   | 2.513074 | 2.147605 | 1.682314 | 170.9455 | 1.96E-22 | 2.57E-21 |
| b22ddfa0-9ed5-40c6-aa67-6d1b3db85d8d | 49.8125  | 36.70006 | 44.25784 | 8.943233 | 7.041601 | 7.184314 | 2.407018 | 1.383081 | 164.0599 | 6.51E-22 | 8.18E-21 |
| 7ec57f51-2bad-4b3a-9d1b-fc9a846d081c | 49.8125  | 36.70006 | 44.25784 | 8.943233 | 7.041601 | 7.184314 | 2.407018 | 1.383081 | 164.0599 | 6.51E-22 | 8.18E-21 |
| 69af6773-805b-4df7-9093-f15db610dcdb | 1.728085 | 1.094524 | 2.136059 | 5.497364 | 5.101375 | 4.75016  | -1.71151 | -0.01849 | 41.10207 | 6.72E-09 | 2.77E-08 |
| 59426350-0d8c-48ab-b046-f0b0db8a7fa9 | 2.644509 | 2.899351 | 2.217457 | 0.253013 | 0.398428 | 0.286943 | 2.882771 | -0.44014 | 53.26458 | 1.16E-10 | 5.67E-10 |
| 16567ea8-18ff-4b9d-9be0-d3d443831db3 | 48.9745  | 50.55401 | 49.61342 | 17.19368 | 18.61437 | 18.54113 | 1.349019 | 6.054845 | 1380.37  | 5.13E-56 | 8.77E-54 |
| f6569567-9447-4744-aedb-b1cc92e99d57 | 16.25    | 13.56025 | 15.77441 | 5.640246 | 4.967831 | 6.505046 | 1.305485 | 2.591446 | 134.9269 | 1.56E-19 | 1.62E-18 |
| c63e6ac9-1551-41aa-a57b-d156f5aae624 | 3.524385 | 3.53192  | 3.097911 | 2.050145 | 1.31155  | 1.1141   | 1.117122 | 1.116006 | 36.8344  | 3.07E-08 | 1.19E-07 |
| 26586f1d-b98b-4a8c-87ea-004ca7f7c4ea | 3.528512 | 3.536056 | 3.101538 | 2.052545 | 1.313085 | 1.115405 | 1.117122 | 1.116006 | 36.8344  | 3.07E-08 | 1.19E-07 |
| ff189051-b611-499a-b5f5-5f6edc5ad102 | 3.528512 | 3.536056 | 3.101538 | 2.052545 | 1.313085 | 1.115405 | 1.117122 | 1.116006 | 36.8344  | 3.07E-08 | 1.19E-07 |
| 70ea3ade-7834-4cd1-99eb-05e713a94ebd | 5.675366 | 3.955992 | 5.93882  | 1.473829 | 1.160443 | 0.557159 | 2.215841 | -0.32182 | 39.8289  | 1.05E-08 | 4.26E-08 |
| 261d7610-e996-493b-ba38-acd6634a8437 | 2.54316  | 2.963485 | 2.404377 | 8.493438 | 9.269311 | 9.876307 | -1.91741 | 2.622437 | 304.1038 | 1.81E-30 | 4.43E-29 |
| 86abcf08-12f1-4623-b02e-de9e97fd258f | 0.171701 | 0.096667 | 0        | 5.774245 | 4.546447 | 6.489602 | -5.83407 | 0.024951 | 190.5924 | 7.49E-24 | 1.11E-22 |
| d539b37c-bdc4-4408-81e9-729742a427fd | 1.078462 | 1.452452 | 0.999076 | 0.384402 | 0.575064 | 0.435952 | 1.2059   | 0.340755 | 24.33983 | 3.73E-06 | 1.14E-05 |
| 8b23d8e6-b9d6-46a8-a427-6dcbc0c29f88 | 6.787015 | 5.925096 | 6.230046 | 1.717891 | 1.90595  | 1.771153 | 1.702412 | 2.518886 | 208.5353 | 4.63E-25 | 7.55E-24 |

|                                      |          |          |          |          |          |          |          |          |          |          |          |
|--------------------------------------|----------|----------|----------|----------|----------|----------|----------|----------|----------|----------|----------|
| e417ff96-7cd4-4639-a099-6d7622620be4 | 0.354929 | 0.31972  | 0.350978 | 1.871074 | 1.625623 | 2.243947 | -2.57319 | -0.00958 | 82.6177  | 2.43E-14 | 1.64E-13 |
| a7e192fb-f405-4d25-865b-1bfe475ed1fc | 14.48976 | 15.92465 | 15.34851 | 0.031545 | 0.037256 | 0.011925 | 9.002228 | 4.691047 | 4866.773 | 1.52E-79 | 1.66E-76 |
| bbb9ca8d-9b66-452f-91f5-33f7a008149f | 12.59263 | 12.82206 | 12.9299  | 2.537054 | 2.950987 | 3.00807  | 2.05502  | 2.890837 | 386.2811 | 3.76E-34 | 1.2E-32  |
| 20fc8209-f1a9-4e77-ac46-dec988420e72 | 2.935234 | 2.612069 | 3.277081 | 1.204842 | 1.355218 | 1.138681 | 1.146025 | 1.454649 | 51.51712 | 2.03E-10 | 9.71E-10 |
| 11a0d0b8-c259-4131-b426-5067a59fe2fa | 5.90003  | 5.479884 | 6.48261  | 0.96951  | 0.906489 | 1.145339 | 2.445768 | 1.691384 | 214.4477 | 1.92E-25 | 3.24E-24 |
| de8c7919-4745-467a-beda-ea1cc956ddf0 | 3.789607 | 2.477665 | 1.947584 | 0.777771 | 1.312266 | 0.756063 | 1.415729 | 0.015719 | 23.73059 | 5.56E-06 | 1.66E-05 |
| 3b4c9e71-b6f7-43cc-978d-847922e6a0d8 | 4.002551 | 2.961653 | 3.392565 | 0.831534 | 0.654722 | 1.41457  | 1.705076 | 0.343386 | 44.43061 | 2.13E-09 | 9.22E-09 |
| 095f0d65-addf-41f5-811f-ccc5f3328b62 | 3.533569 | 2.873571 | 3.127553 | 24.44459 | 19.94929 | 23.87797 | -2.92881 | 2.019288 | 397.8538 | 1.28E-34 | 4.29E-33 |
| d5684c0d-cc5b-4971-af85-8e9d162d0c3e | 1.57355  | 1.948996 | 1.210248 | 0.500576 | 0.563052 | 0.324403 | 1.66368  | -0.18378 | 28.24654 | 7.82E-07 | 2.59E-06 |
| b52310c4-7e85-4a4c-9999-60d742dcf76c | 0.068704 | 0.07736  | 0.135878 | 0.724369 | 0.826015 | 0.698756 | -3.0842  | -0.06456 | 101.2166 | 2.37E-16 | 1.88E-15 |
| f811662f-baa3-41d8-bbb9-2cd467ee272a | 0.498199 | 0.560971 | 0.56398  | 0.027444 | 0.108041 | 0.062248 | 2.827269 | -0.48458 | 49.7047  | 3.66E-10 | 1.71E-09 |
| debb1c73-2017-464c-8667-a6b023984dd0 | 17.9079  | 15.89874 | 18.82479 | 48.20402 | 41.28139 | 45.20202 | -1.45356 | 3.472791 | 369.5868 | 1.86E-33 | 5.63E-32 |
| f492c7e2-b52d-40bf-841e-be8a4fecae2f | 2.645553 | 1.380459 | 2.197808 | 4.809142 | 3.417137 | 4.345519 | -1.0883  | 0.598058 | 26.62485 | 1.5E-06  | 4.8E-06  |
| fae53a65-e228-4a6e-9115-e3cd04938441 | 18.80902 | 18.90713 | 20.2372  | 8.873213 | 9.128987 | 8.408322 | 1.027979 | 2.711614 | 100.1677 | 3.04E-16 | 2.4E-15  |
| 8ce8de69-9932-4bc1-b11d-07b5b3ad4acf | 2.727013 | 3.761497 | 3.595539 | 0        | 0        | 0        | 8.24776  | -0.21547 | 123.8016 | 2.08E-18 | 1.96E-17 |
| bef42cfd-a73b-4434-9697-88ee10ae2972 | 7.845405 | 5.922734 | 6.954833 | 4.213639 | 2.169251 | 2.328088 | 1.197181 | 0.802653 | 32.98768 | 1.3E-07  | 4.7E-07  |
| 4aa7825b-1d20-466a-8bb3-5723fac4f10a | 1.170757 | 0.993773 | 1.28636  | 0.425645 | 0.412479 | 0.495104 | 1.256343 | 0.515535 | 31.20124 | 2.5E-07  | 8.71E-07 |
| 6c95dd1a-1cf9-4da4-b0ed-0f47c6669413 | 8.523365 | 9.066466 | 7.375955 | 0.308508 | 0.539797 | 0.233254 | 4.404698 | 2.791472 | 781.1619 | 2.08E-38 | 9.32E-37 |
| a60038ec-2058-47c7-ac4d-c27784f05c64 | 0.478792 | 0.504889 | 0.668024 | 0        | 0.010878 | 0.010445 | 5.855323 | 0.29438  | 167.2471 | 3.71E-22 | 4.76E-21 |
| ffb6018-97c8-4d27-b850-15874cba3e46  | 1.265146 | 0.777028 | 1.137329 | 1.881663 | 2.140029 | 2.134003 | -1.05056 | -0.19388 | 14.68619 | 0.000236 | 0.000562 |
| 35bd5875-7259-4413-ba29-a5347e244a8d | 2.467506 | 2.778407 | 3.368401 | 5.708801 | 6.207268 | 6.063305 | -1.17408 | 0.88171  | 39.92934 | 1.01E-08 | 4.12E-08 |
| 0376bf9a-b944-4580-b67a-47d8ff75d80b | 0.664141 | 0.452171 | 0.882452 | 0.224612 | 0.176852 | 0.297189 | 1.395253 | -0.03743 | 22.95037 | 6.73E-06 | 1.99E-05 |
| f21ac023-fb9f-4cfc-bebc-37c0da6b0ea4 | 1.130006 | 0.848256 | 1.053466 | 2.24089  | 2.15649  | 1.929584 | -1.14906 | 0.510592 | 29.50372 | 4.79E-07 | 1.62E-06 |
| f814192e-666c-4089-82b9-5ef0aabf7890 | 1.232454 | 1.38774  | 1.218733 | 2.576437 | 3.351601 | 3.387768 | -1.39833 | 0.172639 | 33.44626 | 1.07E-07 | 3.9E-07  |
| 955d6ff5-154a-4b66-bd4b-ad06e035fb4e | 6.857966 | 8.42406  | 9.133495 | 1.133323 | 2.082129 | 4.284358 | 1.509324 | -0.19573 | 23.35638 | 5.62E-06 | 1.68E-05 |
| 29c94c69-b363-4b9f-bae9-2a442b4162ae | 6.62126  | 5.781835 | 6.755408 | 0.614095 | 0.773629 | 1.392897 | 2.622936 | 0.799987 | 121.5866 | 2.46E-18 | 2.31E-17 |



|                                      |          |          |          |          |          |          |          |          |          |          |          |
|--------------------------------------|----------|----------|----------|----------|----------|----------|----------|----------|----------|----------|----------|
| 1ab2b845-7045-49f1-9448-f41e32603474 | 4.156343 | 2.574018 | 3.653398 | 12.46656 | 9.220855 | 9.996835 | -1.6759  | 0.079769 | 42.562   | 4.04E-09 | 1.7E-08  |
| a3d72977-5e25-489d-9d39-39c3da732756 | 11.8948  | 8.690904 | 10.57162 | 20.18111 | 21.3379  | 19.76317 | -1.07554 | 3.155871 | 155.3097 | 7.34E-21 | 8.43E-20 |
| 9a702a51-24f4-4950-9935-cca4f7ba5bdd | 2.997689 | 2.796033 | 3.342846 | 1.05732  | 1.120671 | 0.799408 | 1.518615 | 1.487604 | 85.97117 | 1.02E-14 | 7.07E-14 |
| a3193b74-dd8f-4d1d-b8b9-d9aa9c37b6c6 | 1.576878 | 1.556656 | 1.732582 | 0.431936 | 0.711101 | 0.445328 | 1.487147 | 0.67817  | 46.44012 | 1.08E-09 | 4.8E-09  |
| 92878948-6f1e-4e5b-9aff-3d2b81f9be10 | 0.281024 | 0.143833 | 0.126316 | 0.557293 | 0.76789  | 0.614473 | -1.89688 | 0.038998 | 49.47135 | 3.95E-10 | 1.84E-09 |
| 54fc9b16-42d7-4e0b-88cf-6e17bf7de68  | 3.628979 | 2.626857 | 3.560099 | 0.942405 | 1.576789 | 1.78131  | 1.046212 | 0.253174 | 17.85013 | 5.76E-05 | 0.00015  |
| 723d88a3-43a5-40d8-a514-ba43e7340fcb | 6.647093 | 5.547418 | 6.701979 | 2.416646 | 2.387809 | 2.36455  | 1.2942   | 2.343656 | 114.3857 | 1.17E-17 | 1.04E-16 |
| 3e7939ff-db68-42cd-8516-8d7707220810 | 60.26698 | 63.6192  | 68.28715 | 0        | 0        | 0        | 7.720114 | -0.6749  | 86.2712  | 1.14E-14 | 7.91E-14 |
| bc749351-a44c-4f4e-a0d8-5752838b87e0 | 0.088454 | 0.232399 | 0.194377 | 2.143926 | 1.941263 | 2.390912 | -3.74879 | 0.282371 | 163.7776 | 6.84E-22 | 8.59E-21 |
| c206145c-b11c-43a6-80f6-7e0eb572779a | 0.088802 | 0.233312 | 0.195141 | 2.15235  | 1.948891 | 2.400307 | -3.74879 | 0.282371 | 163.7776 | 6.84E-22 | 8.59E-21 |
| 2b8ea241-9c9c-40ab-b48c-49891f41bba8 | 7.097557 | 6.659861 | 6.327635 | 1.754232 | 1.871335 | 1.711383 | 1.804571 | 2.059773 | 171.4341 | 1.8E-22  | 2.37E-21 |
| 874b62ae-a47d-43ec-8fa2-722980745d63 | 10.77882 | 10.18793 | 9.854875 | 3.861585 | 5.855744 | 3.460299 | 1.111396 | 1.533356 | 48.9622  | 4.78E-10 | 2.21E-09 |
| 7afdea6b-fe3c-4d69-968d-bd7fe5c20910 | 11.888   | 12.45467 | 12.26677 | 0        | 0.221937 | 0        | 7.039582 | 1.870315 | 563.2599 | 5.07E-40 | 2.55E-38 |
| 505e95a5-19f6-4ab3-a311-4dcd8574f96b | 1.510005 | 0.925143 | 1.268728 | 16.02549 | 17.67146 | 16.29761 | -3.84719 | 3.641298 | 1738.752 | 7.34E-56 | 1.24E-53 |
| ac218d9f-12fe-48bd-a2bb-e33cce08009f | 4.214474 | 3.954574 | 3.31861  | 1.91529  | 2.010714 | 1.448093 | 1.000257 | 0.375095 | 18.32628 | 4.68E-05 | 0.000124 |
| c1dc4f76-0003-48a0-980a-555288acd237 | 2.546492 | 1.314199 | 1.748711 | 6.943602 | 4.555966 | 5.104018 | -1.61777 | 0.124741 | 39.87981 | 1.03E-08 | 4.19E-08 |
| 532e986c-3bb4-44b8-b87d-2df146a8b158 | 2.546492 | 1.314199 | 1.748711 | 6.943602 | 4.555966 | 5.104018 | -1.61777 | 0.124741 | 39.87981 | 1.03E-08 | 4.19E-08 |
| 92b343f9-0bb1-485a-858c-ef045559bc8a | 3.180757 | 1.979264 | 4.138615 | 0.608637 | 0.47922  | 0.115043 | 2.880297 | -0.44117 | 48.41157 | 7.87E-10 | 3.55E-09 |
| dac86528-0511-40d9-b2cd-2fab6e1fa4b7 | 0.364665 | 0.424299 | 0.480807 | 0        | 0        | 0        | 7.750538 | -0.64776 | 87.39292 | 8.6E-15  | 6.03E-14 |
| 36b33216-8cdf-42e5-be2f-951901050a87 | 0.863699 | 0.864465 | 0.790818 | 2.006175 | 1.716951 | 1.780601 | -1.21506 | -0.16669 | 20.06245 | 2.22E-05 | 6.11E-05 |
| b912d868-6d2e-4bf3-9677-50f8c4fb4966 | 3.957624 | 4.143555 | 4.882422 | 1.893225 | 1.291907 | 1.908547 | 1.245597 | 0.4856   | 29.66514 | 4.5E-07  | 1.53E-06 |
| d5d06815-f15c-4bbf-8817-49bc753cfb41 | 11.5898  | 4.350031 | 6.791574 | 54.7773  | 60.82409 | 72.21157 | -3.11785 | 0.490263 | 149.4713 | 9.31E-21 | 1.06E-19 |
| 4e66e3c5-6259-42d2-9611-2f3c8936c51a | 5.517399 | 3.345235 | 3.730583 | 13.8872  | 9.719393 | 13.99959 | -1.65228 | 0.299829 | 47.78352 | 6.89E-10 | 3.13E-09 |
| 5bfddd0e-db40-4f5f-b687-476f55f61aa6 | 2.499552 | 0.938163 | 2.441211 | 6.815609 | 7.155175 | 4.962221 | -1.75286 | -0.0891  | 38.6414  | 1.66E-08 | 6.58E-08 |
| 4ec59486-e5c2-4c2e-a323-c3622d5ec2df | 2.157707 | 1.256676 | 2.043761 | 6.356872 | 6.389601 | 4.703978 | -1.75342 | 0.667453 | 68.36672 | 1.21E-12 | 7.03E-12 |
| 14e9c8d9-3909-4003-8c8c-9070a4572146 | 2.499552 | 0.938163 | 2.441211 | 6.815609 | 7.155175 | 4.962221 | -1.75286 | -0.0891  | 38.6414  | 1.66E-08 | 6.58E-08 |

|                                      |          |          |          |          |          |          |          |          |          |          |          |
|--------------------------------------|----------|----------|----------|----------|----------|----------|----------|----------|----------|----------|----------|
| 170602af-1188-44aa-8226-2d28c51bc892 | 2.157707 | 1.256676 | 2.043761 | 6.356872 | 6.389601 | 4.703978 | -1.75342 | 0.667453 | 68.36672 | 1.21E-12 | 7.03E-12 |
| 79a23529-1993-4f53-96ce-855461875a13 | 2.499552 | 0.938163 | 2.441211 | 6.815609 | 7.155175 | 4.962221 | -1.75286 | -0.0891  | 38.6414  | 1.66E-08 | 6.58E-08 |
| 9e3b4791-17cd-4fcc-b6eb-c06fc2ce984b | 2.499552 | 0.938163 | 2.441211 | 6.815609 | 7.155175 | 4.962221 | -1.75286 | -0.0891  | 38.6414  | 1.66E-08 | 6.58E-08 |

**Table S3: GO enrichment list of different expression genes**

| Term                    | Ontology           | ID         | Input_number | Background_number | Rich_factor | P_Value | FDR      | Input                                                                                                                                                                                                                                                                                                                                                                                                                                                                                                                                                                                                                                                                                                                                                                                                                                                                                                                                                                                                                                                                                                                                                                                                                                                                                                                                                                                     | Hyperlink                                                                                                             |
|-------------------------|--------------------|------------|--------------|-------------------|-------------|---------|----------|-------------------------------------------------------------------------------------------------------------------------------------------------------------------------------------------------------------------------------------------------------------------------------------------------------------------------------------------------------------------------------------------------------------------------------------------------------------------------------------------------------------------------------------------------------------------------------------------------------------------------------------------------------------------------------------------------------------------------------------------------------------------------------------------------------------------------------------------------------------------------------------------------------------------------------------------------------------------------------------------------------------------------------------------------------------------------------------------------------------------------------------------------------------------------------------------------------------------------------------------------------------------------------------------------------------------------------------------------------------------------------------------|-----------------------------------------------------------------------------------------------------------------------|
| single-organism process | biological_process | GO:0044699 | 218          | 6188              | 0.405051    | 0.00012 | 0.040097 | LOC114256156 LOC114256190 LOC114257885 LOC114258034 LOC114258043 LOC114258149 LOC114258151 LOC114258208 LOC114258475 LOC114258544 LOC114258722 LOC114258817 LOC114259437 LOC114260454 LOC114260629 LOC114260716 LOC114261073 LOC114261918 LOC114262677 LOC114263059 LOC114263151 LOC114263190 LOC114263392 LOC114263723 LOC114264141 LOC114264481 LOC114264677 LOC114264704 LOC114265556 LOC114265889 LOC114265902 LOC114265969 LOC114266037 LOC114266251 LOC114266263 LOC114266339 LOC114266363 LOC114268759 LOC114268986 LOC114269649 LOC114269705 LOC114269944 LOC114270138 LOC114270152 LOC114270285 LOC114270420 LOC114270637 LOC114270740 LOC114270950 LOC114272337 LOC114272475 LOC114272877 LOC114272975 LOC114273133 LOC114273300 LOC114273305 LOC114274059 LOC114274649 LOC114274659 LOC114274664 LOC114275113 LOC114275199 LOC114275228 LOC114275283 LOC114275505 LOC114276543 LOC114276617 LOC114276659 LOC114276762 LOC114277058 LOC114277383 LOC114277489 LOC114277579 LOC114277629 LOC114277736 LOC114277939 LOC114278046 LOC114278058 LOC114278445 LOC114278736 LOC114278859 LOC114279035 LOC114279462 LOC114279636 LOC114279846 LOC114280147 LOC114281295 LOC114281497 LOC114281562 LOC114282515 LOC114282634 LOC114282856 LOC114284490 LOC114285182 LOC114285600 LOC114285742 LOC114285764 LOC114285947 LOC114286217 LOC114286557 LOC114287631 LOC114287829 LOC11428841 | <a href="http://amigo.geneontology.org/amigo/term/GO:0044699">http://amigo.geneontology.org/amigo/term/GO:0044699</a> |



|                                        |            |            |    |      |          |         |          |                                                                                                                                                                                                                                                                                                                                                                                                                                                                                                                                                                                                                                                                                                                                                                                                                                                                                                                                                                                                                                                                                                                                                                                                                                                                                                                                                                                                                                                                                                                                                                                                                                                                                                                                                                                                                                                                                                                                                                                                                  |
|----------------------------------------|------------|------------|----|------|----------|---------|----------|------------------------------------------------------------------------------------------------------------------------------------------------------------------------------------------------------------------------------------------------------------------------------------------------------------------------------------------------------------------------------------------------------------------------------------------------------------------------------------------------------------------------------------------------------------------------------------------------------------------------------------------------------------------------------------------------------------------------------------------------------------------------------------------------------------------------------------------------------------------------------------------------------------------------------------------------------------------------------------------------------------------------------------------------------------------------------------------------------------------------------------------------------------------------------------------------------------------------------------------------------------------------------------------------------------------------------------------------------------------------------------------------------------------------------------------------------------------------------------------------------------------------------------------------------------------------------------------------------------------------------------------------------------------------------------------------------------------------------------------------------------------------------------------------------------------------------------------------------------------------------------------------------------------------------------------------------------------------------------------------------------------|
| small molecule<br>metabolic<br>process | biological | GO:0044281 | 66 | 1463 | 0.518684 | 0.00021 | 0.040933 | 75283 LOC114276543 LOC114276617 LOC114276762 LOC114277058 LOC114277939 LOC<br>114278046 LOC114279462 LOC114279846 LOC114280147 LOC114281295 LOC114282515 <br>LOC114282634 LOC114282856 LOC114284490 LOC114285742 LOC114285764 LOC114285<br>947 LOC114286217 LOC114287631 LOC114287829 LOC114288413 LOC114288720 LOC11<br>4289014 LOC114289079 LOC114289395 LOC114289925 LOC114290633 LOC114291008 LO<br>C114291259 LOC114292999 LOC114294075 LOC114294164 LOC114294805 LOC11429553<br>8 LOC114296365 LOC114296715 LOC114297323 LOC114297841 LOC114297999 LOC1142<br>98958 LOC114299440 LOC114299547 LOC114299955 LOC114300826 LOC114301496 LOC<br>114302295 LOC114302846 LOC114303354 LOC114306527 LOC114306912 LOC114306996 <br>LOC114307027 LOC114308783 LOC114309241 LOC114309396 LOC114309520 LOC114310<br>205 LOC114310242 LOC114310685 LOC114310850 LOC114311067 LOC114311679 LOC11<br>4312938 LOC114313713 LOC114313963 LOC114314102 LOC114314310 LOC114315991 LO<br>C114316175 LOC114316277 LOC114316533 LOC114317014 LOC114317317 LOC11431749<br>4 LOC114317503 LOC114318308 LOC114320798 LOC114321004 LOC114321080 LOC1143<br>21594 LOC114323396 LOC114323648 LOC114323756 LOC114323885<br>LOC114256190 LOC114258043 LOC114258544 LOC114258817 LOC114261073 LOC114261<br>918 LOC114262677 LOC114263059 LOC114265902 LOC114269944 LOC114270152 LOC11<br>4270285 LOC114270740 LOC114272337 LOC114273133 LOC114273305 LOC114275199 LO<br>C114276543 LOC114276762 LOC114277939 LOC114279846 LOC114282634 LOC11428574<br>2 LOC114285764 LOC114288413 LOC114289079 LOC114291259 LOC114294075 LOC1142<br>94164 LOC114294805 LOC114295538 LOC114296365 LOC114296715 LOC114297323 LOC<br>114297841 LOC114298958 LOC114299547 LOC114299955 LOC114302846 LOC114306527 <br>LOC114306912 LOC114308783 LOC114309396 LOC114309520 LOC114310242 LOC114310<br>685 LOC114310850 LOC114311067 LOC114313713 LOC114313963 LOC114314310 LOC11<br>4315991 LOC114316175 LOC114316277 LOC114317317 LOC114317494 LOC114317503 LO |
|                                        | _process   |            |    |      |          |         |          | http://amigo.g<br>enontology.o<br>rg/amigo/ter<br>m/GO:00442<br>81                                                                                                                                                                                                                                                                                                                                                                                                                                                                                                                                                                                                                                                                                                                                                                                                                                                                                                                                                                                                                                                                                                                                                                                                                                                                                                                                                                                                                                                                                                                                                                                                                                                                                                                                                                                                                                                                                                                                               |

|                                              |                     |            |    |      |          |         |          |                                                                                                                                                                                                                                                                                                                                                                                                                                                                                                                                                                                                                                                                                                                                                                                                                                                                                                                                                                                                                                                                                                                                                                                                                                                                                                                                                                                                                                                                                                                                                                                                                                                                                                                                                                                                                                                                                                                                                                                                                                                                                                                                                                                                                                                                                                                                                                                                                                                                                                                                                                                                                                                                                                                                                                                                                                                                                                                                                                                                                                                                                                                                                                                                                                                                                                                                                                                                                                                                                                                                                                                                                                                                                                                                                                                                                                                                                                                                                                                                                                                                                                                                                                                                                                                                                                                                                                                                                                                                                                                                                                                                                                                                                                                                                                                                                                                                                                                                                                                                                                                                                                                                                                                                                                                                                                                                                                                                                                                                                                                                                                                                                                                                                                                                                                                                                                                                                                                                                                                                                                                                                                                                                                                                                                                                                                                                                                                                                                                                                                                                                                                                                                                                                                                                                                                                                                                                                                                                                                                                                                                                                                                                                                                                                                                                                                                                                                                                                                                                                                                                                                                                                                                                                                                                                                                                                                                                                                                                                                                                                                                                                                                                                                                                                                                                                                                                                                                                                                                                                                                                                                                                                                                                                                                                                                                                                                                                                                                                                                                                                                                                                                                                                                                                                                                                                                                                                                                                                                                                                                                                                                                                                                                                                                                                                                                                                                                                                                                                                                                                                                                                                                                                                                                                                                                                                                                                                                                                                                                                                                                                                                                                                                                                                                                                                                                                                                                                                                                                                                                                                                                                                                     |                                                                                                                       |
|----------------------------------------------|---------------------|------------|----|------|----------|---------|----------|-----------------------------------------------------------------------------------------------------------------------------------------------------------------------------------------------------------------------------------------------------------------------------------------------------------------------------------------------------------------------------------------------------------------------------------------------------------------------------------------------------------------------------------------------------------------------------------------------------------------------------------------------------------------------------------------------------------------------------------------------------------------------------------------------------------------------------------------------------------------------------------------------------------------------------------------------------------------------------------------------------------------------------------------------------------------------------------------------------------------------------------------------------------------------------------------------------------------------------------------------------------------------------------------------------------------------------------------------------------------------------------------------------------------------------------------------------------------------------------------------------------------------------------------------------------------------------------------------------------------------------------------------------------------------------------------------------------------------------------------------------------------------------------------------------------------------------------------------------------------------------------------------------------------------------------------------------------------------------------------------------------------------------------------------------------------------------------------------------------------------------------------------------------------------------------------------------------------------------------------------------------------------------------------------------------------------------------------------------------------------------------------------------------------------------------------------------------------------------------------------------------------------------------------------------------------------------------------------------------------------------------------------------------------------------------------------------------------------------------------------------------------------------------------------------------------------------------------------------------------------------------------------------------------------------------------------------------------------------------------------------------------------------------------------------------------------------------------------------------------------------------------------------------------------------------------------------------------------------------------------------------------------------------------------------------------------------------------------------------------------------------------------------------------------------------------------------------------------------------------------------------------------------------------------------------------------------------------------------------------------------------------------------------------------------------------------------------------------------------------------------------------------------------------------------------------------------------------------------------------------------------------------------------------------------------------------------------------------------------------------------------------------------------------------------------------------------------------------------------------------------------------------------------------------------------------------------------------------------------------------------------------------------------------------------------------------------------------------------------------------------------------------------------------------------------------------------------------------------------------------------------------------------------------------------------------------------------------------------------------------------------------------------------------------------------------------------------------------------------------------------------------------------------------------------------------------------------------------------------------------------------------------------------------------------------------------------------------------------------------------------------------------------------------------------------------------------------------------------------------------------------------------------------------------------------------------------------------------------------------------------------------------------------------------------------------------------------------------------------------------------------------------------------------------------------------------------------------------------------------------------------------------------------------------------------------------------------------------------------------------------------------------------------------------------------------------------------------------------------------------------------------------------------------------------------------------------------------------------------------------------------------------------------------------------------------------------------------------------------------------------------------------------------------------------------------------------------------------------------------------------------------------------------------------------------------------------------------------------------------------------------------------------------------------------------------------------------------------------------------------------------------------------------------------------------------------------------------------------------------------------------------------------------------------------------------------------------------------------------------------------------------------------------------------------------------------------------------------------------------------------------------------------------------------------------------------------------------------------------------------------------------------------------------------------------------------------------------------------------------------------------------------------------------------------------------------------------------------------------------------------------------------------------------------------------------------------------------------------------------------------------------------------------------------------------------------------------------------------------------------------------------------------------------------------------------------------------------------------------------------------------------------------------------------------------------------------------------------------------------------------------------------------------------------------------------------------------------------------------------------------------------------------------------------------------------------------------------------------------------------------------------------------------------------------------------------------------------------------------------------------------------------------------------------------------------------------------------------------------------------------------------------------------------------------------------------------------------------------------------------------------------------------------------------------------------------------------------------------------------------------------------------------------------------------------------------------------------------------------------------------------------------------------------------------------------------------------------------------------------------------------------------------------------------------------------------------------------------------------------------------------------------------------------------------------------------------------------------------------------------------------------------------------------------------------------------------------------------------------------------------------------------------------------------------------------------------------------------------------------------------------------------------------------------------------------------------------------------------------------------------------------------------------------------------------------------------------------------------------------------------------------------------------------------------------------------------------------------------------------------------------------------------------------------------------------------------------------------------------------------------------------------------------------------------------------------------------------------------------------------------------------------------------------------------------------------------------------------------------------------------------------------------------------------------------------------------------------------------------------------------------------------------------------------------------------------------------------------------------------------------------------------------------------------------------------------------------------------------------------------------------------------------------------------------------------------------------------------------------------------------------------------------------------------------------------------------------------------------------------------------------------------------------------------------------------------------------------------------------------------------------------------------------------------------------------------------------------------------------------------------------------------------------------------------------------------------------------------------------------------------------------------------------------------------------------------------------------------------------------------------------------------------------------------------------------------------------------------------|-----------------------------------------------------------------------------------------------------------------------|
|                                              |                     |            |    |      |          |         |          | C114318308 LOC114320798 LOC114321004 LOC114321080 LOC114321594 LOC114323396 LOC114323648 LOC114323756 LOC114323885                                                                                                                                                                                                                                                                                                                                                                                                                                                                                                                                                                                                                                                                                                                                                                                                                                                                                                                                                                                                                                                                                                                                                                                                                                                                                                                                                                                                                                                                                                                                                                                                                                                                                                                                                                                                                                                                                                                                                                                                                                                                                                                                                                                                                                                                                                                                                                                                                                                                                                                                                                                                                                                                                                                                                                                                                                                                                                                                                                                                                                                                                                                                                                                                                                                                                                                                                                                                                                                                                                                                                                                                                                                                                                                                                                                                                                                                                                                                                                                                                                                                                                                                                                                                                                                                                                                                                                                                                                                                                                                                                                                                                                                                                                                                                                                                                                                                                                                                                                                                                                                                                                                                                                                                                                                                                                                                                                                                                                                                                                                                                                                                                                                                                                                                                                                                                                                                                                                                                                                                                                                                                                                                                                                                                                                                                                                                                                                                                                                                                                                                                                                                                                                                                                                                                                                                                                                                                                                                                                                                                                                                                                                                                                                                                                                                                                                                                                                                                                                                                                                                                                                                                                                                                                                                                                                                                                                                                                                                                                                                                                                                                                                                                                                                                                                                                                                                                                                                                                                                                                                                                                                                                                                                                                                                                                                                                                                                                                                                                                                                                                                                                                                                                                                                                                                                                                                                                                                                                                                                                                                                                                                                                                                                                                                                                                                                                                                                                                                                                                                                                                                                                                                                                                                                                                                                                                                                                                                                                                                                                                                                                                                                                                                                                                                                                                                                                                                                                                                                                                                  |                                                                                                                       |
|                                              |                     |            |    |      |          |         |          | LOC114256190 LOC114258043 LOC114258400 LOC114258544 LOC114261073 LOC114262677 LOC114262969 LOC114263059 LOC114263429 LOC114265902 LOC114269944 LOC114270740 LOC114276687 LOC114276762 LOC114277939 LOC114279846 LOC114282634 LOC114284055 LOC114285742 LOC114285746 LOC114285764 LOC114286827 LOC114289079 LOC114290548 LOC114291111 LOC114291259 LOC114291656 LOC114293435 LOC114294164 LOC114295538 LOC114296365 LOC114297157 LOC114297323 LOC114297841 LOC114298543 LOC114298693 LOC114302846 LOC114306912 LOC114306956 LOC114307001 LOC114308783 LOC114309520 LOC114310850 LOC114311067 LOC114311679 LOC114311741 LOC114311810 LOC114313277 LOC114313713 LOC114313963 LOC114314310 LOC114315174 LOC114315991 LOC114316175 LOC114316277 LOC114316533 LOC114317494 LOC114317503 LOC114318161 LOC114318164 LOC114318308 LOC114320798 LOC114321004 LOC114321080 LOC114321594 LOC114323756                                                                                                                                                                                                                                                                                                                                                                                                                                                                                                                                                                                                                                                                                                                                                                                                                                                                                                                                                                                                                                                                                                                                                                                                                                                                                                                                                                                                                                                                                                                                                                                                                                                                                                                                                                                                                                                                                                                                                                                                                                                                                                                                                                                                                                                                                                                                                                                                                                                                                                                                                                                                                                                                                                                                                                                                                                                                                                                                                                                                                                                                                                                                                                                                                                                                                                                                                                                                                                                                                                                                                                                                                                                                                                                                                                                                                                                                                                                                                                                                                                                                                                                                                                                                                                                                                                                                                                                                                                                                                                                                                                                                                                                                                                                                                                                                                                                                                                                                                                                                                                                                                                                                                                                                                                                                                                                                                                                                                                                                                                                                                                                                                                                                                                                                                                                                                                                                                                                                                                                                                                                                                                                                                                                                                                                                                                                                                                                                                                                                                                                                                                                                                                                                                                                                                                                                                                                                                                                                                                                                                                                                                                                                                                                                                                                                                                                                                                                                                                                                                                                                                                                                                                                                                                                                                                                                                                                                                                                                                                                                                                                                                                                                                                                                                                                                                                                                                                                                                                                                                                                                                                                                                                                                                                                                                                                                                                                                                                                                                                                                                                                                                                                                                                                                                                                                                                                                                                                                                                                                                                                                                                                                                                                                                                                                                                                                                                                                                                                                                                                                                                                                                                                                                                                                           |                                                                                                                       |
| organonitrogen compound metabolic process    | biological _process | GO:1901564 | 66 | 1757 | 0.431892 | 0.01761 | 0.352049 | LOC114256190 LOC114258400 LOC114261073 LOC114262677 LOC114262969 LOC114263429 LOC114265902 LOC114269944 LOC114270740 LOC114276687 LOC114276762 LOC114277939 LOC114279846 LOC114282634 LOC114284055 LOC114285742 LOC114285746 LOC114285764 LOC114286827 LOC114289079 LOC114290548 LOC114291111 LOC114291259 LOC114291656 LOC114293435 LOC114294164 LOC114295538 LOC114296365 LOC114297157 LOC114297323 LOC114297841 LOC114298543 LOC114298693 LOC114302846 LOC114306912 LOC114306956 LOC114307001 LOC114308783 LOC114309520 LOC114310850 LOC114311067 LOC114311679 LOC114311741 LOC114311810 LOC114313277 LOC114313713 LOC114313963 LOC114314310 LOC114315174 LOC114315991 LOC114316175 LOC114316277 LOC114316533 LOC114317494 LOC114317503 LOC114318161 LOC114318164 LOC114318308 LOC114320798 LOC114321004 LOC114321080 LOC114321594 LOC114323756                                                                                                                                                                                                                                                                                                                                                                                                                                                                                                                                                                                                                                                                                                                                                                                                                                                                                                                                                                                                                                                                                                                                                                                                                                                                                                                                                                                                                                                                                                                                                                                                                                                                                                                                                                                                                                                                                                                                                                                                                                                                                                                                                                                                                                                                                                                                                                                                                                                                                                                                                                                                                                                                                                                                                                                                                                                                                                                                                                                                                                                                                                                                                                                                                                                                                                                                                                                                                                                                                                                                                                                                                                                                                                                                                                                                                                                                                                                                                                                                                                                                                                                                                                                                                                                                                                                                                                                                                                                                                                                                                                                                                                                                                                                                                                                                                                                                                                                                                                                                                                                                                                                                                                                                                                                                                                                                                                                                                                                                                                                                                                                                                                                                                                                                                                                                                                                                                                                                                                                                                                                                                                                                                                                                                                                                                                                                                                                                                                                                                                                                                                                                                                                                                                                                                                                                                                                                                                                                                                                                                                                                                                                                                                                                                                                                                                                                                                                                                                                                                                                                                                                                                                                                                                                                                                                                                                                                                                                                                                                                                                                                                                                                                                                                                                                                                                                                                                                                                                                                                                                                                                                                                                                                                                                                                                                                                                                                                                                                                                                                                                                                                                                                                                                                                                                                                                                                                                                                                                                                                                                                                                                                                                                                                                                                                                                                                                                                                                                                                                                                                                                                                                                                                                                                                                                  | <a href="http://amigo.geneontology.org/amigo/term/GO:1901564">http://amigo.geneontology.org/amigo/term/GO:1901564</a> |
|                                              |                     |            |    |      |          |         |          | LOC114256190 LOC114258400 LOC114261073 LOC114262677 LOC114262969 LOC114263429 LOC114265902 LOC114269944 LOC114270740 LOC114276687 LOC114276762 LOC114279846 LOC114282634 LOC114284055 LOC114285742 LOC114285746 LOC114285764 LOC114286827 LOC114289079 LOC114290548 LOC114291111 LOC114291259 LOC114291656 LOC114293435 LOC114294164 LOC114295538 LOC114296365 LOC114297157 LOC114297841 LOC114298543 LOC114298693 LOC114302846 LOC114306912 LOC114306956 LOC114307001 LOC114309520 LOC114310850 LOC114311067 LOC114311679 LOC114311741 LOC114311810 LOC114313277 LOC114313713 LOC114313963 LOC114314310 LOC114315174 LOC114315991 LOC114316175 LOC114316277 LOC114316533 LOC114317494 LOC114317503 LOC114318161 LOC114318164 LOC114318308 LOC114320798 LOC114321004 LOC114321080 LOC114321594 LOC114323756                                                                                                                                                                                                                                                                                                                                                                                                                                                                                                                                                                                                                                                                                                                                                                                                                                                                                                                                                                                                                                                                                                                                                                                                                                                                                                                                                                                                                                                                                                                                                                                                                                                                                                                                                                                                                                                                                                                                                                                                                                                                                                                                                                                                                                                                                                                                                                                                                                                                                                                                                                                                                                                                                                                                                                                                                                                                                                                                                                                                                                                                                                                                                                                                                                                                                                                                                                                                                                                                                                                                                                                                                                                                                                                                                                                                                                                                                                                                                                                                                                                                                                                                                                                                                                                                                                                                                                                                                                                                                                                                                                                                                                                                                                                                                                                                                                                                                                                                                                                                                                                                                                                                                                                                                                                                                                                                                                                                                                                                                                                                                                                                                                                                                                                                                                                                                                                                                                                                                                                                                                                                                                                                                                                                                                                                                                                                                                                                                                                                                                                                                                                                                                                                                                                                                                                                                                                                                                                                                                                                                                                                                                                                                                                                                                                                                                                                                                                                                                                                                                                                                                                                                                                                                                                                                                                                                                                                                                                                                                                                                                                                                                                                                                                                                                                                                                                                                                                                                                                                                                                                                                                                                                                                                                                                                                                                                                                                                                                                                                                                                                                                                                                                                                                                                                                                                                                                                                                                                                                                                                                                                                                                                                                                                                                                                                                                                                                                                                                                                                                                                                                                                                                                                                                                                                                                                         |                                                                                                                       |
| organonitrogen compound biosynthetic process | biological _process | GO:1901566 | 56 | 1353 | 0.475876 | 0.00452 | 0.21372  | LOC114256190 LOC114258400 LOC114261073 LOC114262677 LOC114262969 LOC114263429 LOC114265902 LOC114269944 LOC114270740 LOC114276687 LOC114276762 LOC114279846 LOC114282634 LOC114284055 LOC114285742 LOC114285746 LOC114285764 LOC114286827 LOC114289079 LOC114290548 LOC114291111 LOC114291259 LOC114291656 LOC114293435 LOC114294164 LOC114295538 LOC114296365 LOC114297157 LOC114297841 LOC114298543 LOC114298693 LOC114302846 LOC114306912 LOC114306956 LOC114307001 LOC114309520 LOC114310850 LOC114311067 LOC114311679 LOC114311741 LOC114311810 LOC114313277 LOC114313713 LOC114313963 LOC114314310 LOC114315174 LOC114315991 LOC114316175 LOC114316277 LOC114316533 LOC114317494 LOC114317503 LOC114318161 LOC114318164 LOC114318308 LOC114320798 LOC114321004 LOC114321080 LOC114321594 LOC114323756                                                                                                                                                                                                                                                                                                                                                                                                                                                                                                                                                                                                                                                                                                                                                                                                                                                                                                                                                                                                                                                                                                                                                                                                                                                                                                                                                                                                                                                                                                                                                                                                                                                                                                                                                                                                                                                                                                                                                                                                                                                                                                                                                                                                                                                                                                                                                                                                                                                                                                                                                                                                                                                                                                                                                                                                                                                                                                                                                                                                                                                                                                                                                                                                                                                                                                                                                                                                                                                                                                                                                                                                                                                                                                                                                                                                                                                                                                                                                                                                                                                                                                                                                                                                                                                                                                                                                                                                                                                                                                                                                                                                                                                                                                                                                                                                                                                                                                                                                                                                                                                                                                                                                                                                                                                                                                                                                                                                                                                                                                                                                                                                                                                                                                                                                                                                                                                                                                                                                                                                                                                                                                                                                                                                                                                                                                                                                                                                                                                                                                                                                                                                                                                                                                                                                                                                                                                                                                                                                                                                                                                                                                                                                                                                                                                                                                                                                                                                                                                                                                                                                                                                                                                                                                                                                                                                                                                                                                                                                                                                                                                                                                                                                                                                                                                                                                                                                                                                                                                                                                                                                                                                                                                                                                                                                                                                                                                                                                                                                                                                                                                                                                                                                                                                                                                                                                                                                                                                                                                                                                                                                                                                                                                                                                                                                                                                                                                                                                                                                                                                                                                                                                                                                                                                                                                                                         | <a href="http://amigo.geneontology.org/amigo/term/GO:1901566">http://amigo.geneontology.org/amigo/term/GO:1901566</a> |
| cellular component                           | biological _process | GO:0071840 | 53 | 1100 | 0.55397  | 0.00019 | 0.040933 | LOC114260629 LOC114260756 LOC114263018 LOC114264677 LOC114264704 LOC114266363 LOC114267347 LOC114267438 LOC114267817 LOC114270680 LOC114270950 LOC114271000 LOC114271001 LOC114271002 LOC114271003 LOC114271004 LOC114271005 LOC114271006 LOC114271007 LOC114271008 LOC114271009 LOC114271010 LOC114271011 LOC114271012 LOC114271013 LOC114271014 LOC114271015 LOC114271016 LOC114271017 LOC114271018 LOC114271019 LOC114271020 LOC114271021 LOC114271022 LOC114271023 LOC114271024 LOC114271025 LOC114271026 LOC114271027 LOC114271028 LOC114271029 LOC114271030 LOC114271031 LOC114271032 LOC114271033 LOC114271034 LOC114271035 LOC114271036 LOC114271037 LOC114271038 LOC114271039 LOC114271040 LOC114271041 LOC114271042 LOC114271043 LOC114271044 LOC114271045 LOC114271046 LOC114271047 LOC114271048 LOC114271049 LOC114271050 LOC114271051 LOC114271052 LOC114271053 LOC114271054 LOC114271055 LOC114271056 LOC114271057 LOC114271058 LOC114271059 LOC114271060 LOC114271061 LOC114271062 LOC114271063 LOC114271064 LOC114271065 LOC114271066 LOC114271067 LOC114271068 LOC114271069 LOC114271070 LOC114271071 LOC114271072 LOC114271073 LOC114271074 LOC114271075 LOC114271076 LOC114271077 LOC114271078 LOC114271079 LOC114271080 LOC114271081 LOC114271082 LOC114271083 LOC114271084 LOC114271085 LOC114271086 LOC114271087 LOC114271088 LOC114271089 LOC114271090 LOC114271091 LOC114271092 LOC114271093 LOC114271094 LOC114271095 LOC114271096 LOC114271097 LOC114271098 LOC114271099 LOC114271100 LOC114271101 LOC114271102 LOC114271103 LOC114271104 LOC114271105 LOC114271106 LOC114271107 LOC114271108 LOC114271109 LOC114271110 LOC114271111 LOC114271112 LOC114271113 LOC114271114 LOC114271115 LOC114271116 LOC114271117 LOC114271118 LOC114271119 LOC114271120 LOC114271121 LOC114271122 LOC114271123 LOC114271124 LOC114271125 LOC114271126 LOC114271127 LOC114271128 LOC114271129 LOC114271130 LOC114271131 LOC114271132 LOC114271133 LOC114271134 LOC114271135 LOC114271136 LOC114271137 LOC114271138 LOC114271139 LOC114271140 LOC114271141 LOC114271142 LOC114271143 LOC114271144 LOC114271145 LOC114271146 LOC114271147 LOC114271148 LOC114271149 LOC114271150 LOC114271151 LOC114271152 LOC114271153 LOC114271154 LOC114271155 LOC114271156 LOC114271157 LOC114271158 LOC114271159 LOC114271160 LOC114271161 LOC114271162 LOC114271163 LOC114271164 LOC114271165 LOC114271166 LOC114271167 LOC114271168 LOC114271169 LOC114271170 LOC114271171 LOC114271172 LOC114271173 LOC114271174 LOC114271175 LOC114271176 LOC114271177 LOC114271178 LOC114271179 LOC114271180 LOC114271181 LOC114271182 LOC114271183 LOC114271184 LOC114271185 LOC114271186 LOC114271187 LOC114271188 LOC114271189 LOC114271190 LOC114271191 LOC114271192 LOC114271193 LOC114271194 LOC114271195 LOC114271196 LOC114271197 LOC114271198 LOC114271199 LOC114271200 LOC114271201 LOC114271202 LOC114271203 LOC114271204 LOC114271205 LOC114271206 LOC114271207 LOC114271208 LOC114271209 LOC114271210 LOC114271211 LOC114271212 LOC114271213 LOC114271214 LOC114271215 LOC114271216 LOC114271217 LOC114271218 LOC114271219 LOC114271220 LOC114271221 LOC114271222 LOC114271223 LOC114271224 LOC114271225 LOC114271226 LOC114271227 LOC114271228 LOC114271229 LOC114271230 LOC114271231 LOC114271232 LOC114271233 LOC114271234 LOC114271235 LOC114271236 LOC114271237 LOC114271238 LOC114271239 LOC114271240 LOC114271241 LOC114271242 LOC114271243 LOC114271244 LOC114271245 LOC114271246 LOC114271247 LOC114271248 LOC114271249 LOC114271250 LOC114271251 LOC114271252 LOC114271253 LOC114271254 LOC114271255 LOC114271256 LOC114271257 LOC114271258 LOC114271259 LOC114271260 LOC114271261 LOC114271262 LOC114271263 LOC114271264 LOC114271265 LOC114271266 LOC114271267 LOC114271268 LOC114271269 LOC114271270 LOC114271271 LOC114271272 LOC114271273 LOC114271274 LOC114271275 LOC114271276 LOC114271277 LOC114271278 LOC114271279 LOC114271280 LOC114271281 LOC114271282 LOC114271283 LOC114271284 LOC114271285 LOC114271286 LOC114271287 LOC114271288 LOC114271289 LOC114271290 LOC114271291 LOC114271292 LOC114271293 LOC114271294 LOC114271295 LOC114271296 LOC114271297 LOC114271298 LOC114271299 LOC114271300 LOC114271301 LOC114271302 LOC114271303 LOC114271304 LOC114271305 LOC114271306 LOC114271307 LOC114271308 LOC114271309 LOC114271310 LOC114271311 LOC114271312 LOC114271313 LOC114271314 LOC114271315 LOC114271316 LOC114271317 LOC114271318 LOC114271319 LOC114271320 LOC114271321 LOC114271322 LOC114271323 LOC114271324 LOC114271325 LOC114271326 LOC114271327 LOC114271328 LOC114271329 LOC114271330 LOC114271331 LOC114271332 LOC114271333 LOC114271334 LOC114271335 LOC114271336 LOC114271337 LOC114271338 LOC114271339 LOC114271340 LOC114271341 LOC114271342 LOC114271343 LOC114271344 LOC114271345 LOC114271346 LOC114271347 LOC114271348 LOC114271349 LOC114271350 LOC114271351 LOC114271352 LOC114271353 LOC114271354 LOC114271355 LOC114271356 LOC114271357 LOC114271358 LOC114271359 LOC114271360 LOC114271361 LOC114271362 LOC114271363 LOC114271364 LOC114271365 LOC114271366 LOC114271367 LOC114271368 LOC114271369 LOC114271370 LOC114271371 LOC114271372 LOC114271373 LOC114271374 LOC114271375 LOC114271376 LOC114271377 LOC114271378 LOC114271379 LOC114271380 LOC114271381 LOC114271382 LOC114271383 LOC114271384 LOC114271385 LOC114271386 LOC114271387 LOC114271388 LOC114271389 LOC114271390 LOC114271391 LOC114271392 LOC114271393 LOC114271394 LOC114271395 LOC114271396 LOC114271397 LOC114271398 LOC114271399 LOC114271400 LOC114271401 LOC114271402 LOC114271403 LOC114271404 LOC114271405 LOC114271406 LOC114271407 LOC114271408 LOC114271409 LOC114271410 LOC114271411 LOC114271412 LOC114271413 LOC114271414 LOC114271415 LOC114271416 LOC114271417 LOC114271418 LOC114271419 LOC114271420 LOC114271421 LOC114271422 LOC114271423 LOC114271424 LOC114271425 LOC114271426 LOC114271427 LOC114271428 LOC114271429 LOC114271430 LOC114271431 LOC114271432 LOC114271433 LOC114271434 LOC114271435 LOC114271436 LOC114271437 LOC114271438 LOC114271439 LOC114271440 LOC114271441 LOC114271442 LOC114271443 LOC114271444 LOC114271445 LOC114271446 LOC114271447 LOC114271448 LOC114271449 LOC114271450 LOC114271451 LOC114271452 LOC114271453 LOC114271454 LOC114271455 LOC114271456 LOC114271457 LOC114271458 LOC114271459 LOC114271460 LOC114271461 LOC114271462 LOC114271463 LOC114271464 LOC114271465 LOC114271466 LOC114271467 LOC114271468 LOC114271469 LOC114271470 LOC114271471 LOC114271472 LOC114271473 LOC114271474 LOC114271475 LOC114271476 LOC114271477 LOC114271478 LOC114271479 LOC114271480 LOC114271481 LOC114271482 LOC114271483 LOC114271484 LOC114271485 LOC114271486 LOC114271487 LOC114271488 LOC114271489 LOC114271490 LOC114271491 LOC114271492 LOC114271493 LOC114271494 LOC114271495 LOC114271496 LOC114271497 LOC114271498 LOC114271499 LOC114271500 LOC114271501 LOC114271502 LOC114271503 LOC114271504 LOC114271505 LOC114271506 LOC114271507 LOC114271508 LOC114271509 LOC114271510 LOC114271511 LOC114271512 LOC114271513 LOC114271514 LOC114271515 LOC114271516 LOC114271517 LOC114271518 LOC114271519 LOC114271520 LOC114271521 LOC114271522 LOC114271523 LOC114271524 LOC114271525 LOC114271526 LOC114271527 LOC114271528 LOC114271529 LOC114271530 LOC114271531 LOC114271532 LOC114271533 LOC114271534 LOC114271535 LOC114271536 LOC114271537 LOC114271538 LOC114271539 LOC114271540 LOC114271541 LOC114271542 LOC114271543 LOC114271544 LOC114271545 LOC114271546 LOC114271547 LOC114271548 LOC114271549 LOC114271550 LOC114271551 LOC114271552 LOC114271553 LOC114271554 LOC114271555 LOC114271556 LOC114271557 LOC114271558 LOC114271559 LOC114271560 LOC114271561 LOC114271562 LOC114271563 LOC114271564 LOC114271565 LOC114271566 LOC114271567 LOC114271568 LOC114271569 LOC114271570 LOC114271571 LOC114271572 LOC114271573 LOC114271574 LOC114271575 LOC114271576 LOC114271577 LOC114271578 LOC114271579 LOC114271580 LOC114271581 LOC114271582 LOC114271583 LOC114271584 LOC114271585 LOC114271586 LOC114271587 LOC114271588 LOC114271589 LOC114271590 LOC114271591 LOC114271592 LOC114271593 LOC114271594 LOC114271595 LOC114271596 LOC114271597 LOC114271598 LOC114271599 LOC114271600 LOC114271601 LOC114271602 LOC114271603 LOC114271604 LOC114271605 LOC114271606 LOC114271607 LOC114271608 LOC114271609 LOC114271610 LOC114271611 LOC114271612 LOC114271613 LOC114271614 LOC114271615 LOC114271616 LOC114271617 LOC114271618 LOC114271619 LOC114271620 LOC114271621 LOC114271622 LOC114271623 LOC114271624 LOC114271625 LOC114271626 LOC114271627 LOC114271628 LOC114271629 LOC114271630 LOC114271631 LOC114271632 LOC114271633 LOC114271634 LOC114271635 LOC114271636 LOC114271637 LOC114271638 LOC114271639 LOC114271640 LOC114271641 LOC114271642 LOC114271643 LOC114271644 LOC114271645 LOC114271646 LOC114271647 LOC114271648 LOC114271649 LOC114271650 LOC114271651 LOC114271652 LOC114271653 LOC114271654 LOC114271655 LOC114271656 LOC114271657 LOC114271658 LOC114271659 LOC114271660 LOC114271661 LOC114271662 LOC114271663 LOC114271664 LOC114271665 LOC114271666 LOC114271667 LOC114271668 LOC114271669 LOC114271670 LOC114271671 LOC114271672 LOC114271673 LOC114271674 LOC114271675 LOC114271676 LOC114271677 LOC114271678 LOC114271679 LOC114271680 LOC114271681 LOC114271682 LOC114271683 LOC114271684 LOC114271685 LOC114271686 LOC114271687 LOC114271688 LOC114271689 LOC114271690 LOC114271691 LOC114271692 LOC114271693 LOC114271694 LOC114271695 LOC114271696 LOC114271697 LOC114271698 LOC114271699 LOC114271700 LOC114271701 LOC114271702 LOC114271703 LOC114271704 LOC114271705 LOC114271706 LOC114271707 LOC114271708 LOC114271709 LOC114271710 LOC114271711 LOC114271712 LOC114271713 LOC114271714 LOC114271715 LOC114271716 LOC114271717 LOC114271718 LOC114271719 LOC114271720 LOC114271721 LOC114271722 LOC114271723 LOC114271724 LOC114271725 LOC114271726 LOC114271727 LOC114271728 LOC114271729 LOC114271730 LOC114271731 LOC114271732 LOC114271733 LOC114271734 LOC114271735 LOC114271736 LOC114271737 LOC114271738 LOC114271739 LOC114271740 LOC114271741 LOC114271742 LOC114271743 LOC114271744 LOC114271745 LOC114271746 LOC114271747 LOC114271748 LOC114271749 LOC114271750 LOC114271751 LOC114271752 LOC114271753 LOC114271754 LOC114271755 LOC114271756 LOC114271757 LOC114271758 LOC114271759 LOC114271760 LOC114271761 LOC114271762 LOC114271763 LOC114271764 LOC114271765 LOC114271766 LOC114271767 LOC114271768 LOC114271769 LOC114271770 LOC114271771 LOC114271772 LOC114271773 LOC114271774 LOC114271775 LOC114271776 LOC114271777 LOC114271778 LOC114271779 LOC114271780 LOC114271781 LOC114271782 LOC114271783 LOC114271784 LOC114271785 LOC114271786 LOC114271787 LOC114271788 LOC114271789 LOC114271790 LOC114271791 LOC114271792 LOC114271793 LOC114271794 LOC114271795 LOC114271796 LOC114271797 LOC114271798 LOC114271799 LOC114271800 LOC114271801 LOC114271802 LOC114271803 LOC114271804 LOC114271805 LOC114271806 LOC114271807 LOC114271808 |                                                                                                                       |

|                                                              |                        |            |    |     |          |         |          |                                                                                                                                                                                                                                                                                                                                                                                                                                                                                                                                                                                                          |                                                                                                                       |
|--------------------------------------------------------------|------------------------|------------|----|-----|----------|---------|----------|----------------------------------------------------------------------------------------------------------------------------------------------------------------------------------------------------------------------------------------------------------------------------------------------------------------------------------------------------------------------------------------------------------------------------------------------------------------------------------------------------------------------------------------------------------------------------------------------------------|-----------------------------------------------------------------------------------------------------------------------|
| organization or<br>biogenesis                                |                        |            |    |     |          |         |          | 4273300 LOC114273602 LOC114274441 LOC114274537 LOC114275505 LOC114277383 LOC114277629 LOC114278552 LOC114279418 LOC114280503 LOC114284490 LOC114285072 LOC114285852 LOC114286217 LOC114286557 LOC114292214 LOC114294661 LOC114294776 LOC114295471 LOC114295560 LOC114296189 LOC114299009 LOC114300977 LOC114301033 LOC114301641 LOC114305356 LOC114305423 LOC114306769 LOC114308420 LOC114309641 LOC114309735 LOC114311226 LOC114311681 LOC114312304 LOC114315282 LOC114316831 LOC114317014 LOC114317430 LOC114317545 LOC114317632 LOC114320128 LOC114322299                                             | rg/amigo/term/GO:0071840                                                                                              |
| cellular<br>component<br>organization                        | biological<br>_process | GO:0016043 | 45 | 981 | 0.527408 | 0.00164 | 0.123741 | LOC114260629 LOC114263018 LOC114264677 LOC114264704 LOC114266363 LOC114267347 LOC114267438 LOC114267817 LOC114270950 LOC114273300 LOC114274441 LOC114274537 LOC114275505 LOC114277383 LOC114277629 LOC114278552 LOC114279418 LOC114280503 LOC114284490 LOC114285072 LOC114285852 LOC114286217 LOC114286557 LOC114292214 LOC114294661 LOC114294776 LOC114295471 LOC114295560 LOC114299009 LOC114300977 LOC114301033 LOC114305356 LOC114305423 LOC114306769 LOC114309641 LOC114309735 LOC114311681 LOC114315282 LOC114316831 LOC114317014 LOC114317430 LOC114317545 LOC114317632 LOC114320128 LOC114322299 | <a href="http://amigo.geneontology.org/amigo/term/GO:0016043">http://amigo.geneontology.org/amigo/term/GO:0016043</a> |
| phosphate-<br>containing<br>compound<br>metabolic<br>process | biological<br>_process | GO:0006796 | 34 | 798 | 0.489868 | 0.01696 | 0.341978 | LOC114258149 LOC114258544 LOC114261073 LOC114261918 LOC114262677 LOC114262969 LOC114268471 LOC114269944 LOC114270637 LOC114270740 LOC114273053 LOC114274659 LOC114275394 LOC114279846 LOC114287256 LOC114287829 LOC114288413 LOC114288720 LOC114294805 LOC114295538 LOC114297157 LOC114297323 LOC114299440 LOC114299547 LOC114299955 LOC114300826 LOC114305378 LOC114307027 LOC114308176 LOC114311450 LOC114313963 LOC114315853 LOC114316175 LOC114320798                                                                                                                                                | <a href="http://amigo.geneontology.org/amigo/term/GO:0006796">http://amigo.geneontology.org/amigo/term/GO:0006796</a> |
| phosphorus<br>metabolic<br>process                           | biological<br>_process | GO:0006793 | 34 | 810 | 0.482611 | 0.02065 | 0.394823 | LOC114258149 LOC114258544 LOC114261073 LOC114261918 LOC114262677 LOC114262969 LOC114268471 LOC114269944 LOC114270637 LOC114270740 LOC114273053 LOC114274659 LOC114275394 LOC114279846 LOC114287256 LOC114287829 LOC114288413 LOC114288720 LOC114294805 LOC114295538 LOC114297157 LOC114297323 LOC114299440                                                                                                                                                                                                                                                                                               | <a href="http://amigo.geneontology.org/amigo/term/GO:0006793">http://amigo.geneontology.org/amigo/term/GO:0006793</a> |

|                                                    |                        |            |    |     |          |         |          |                                                                                                                                                                                                                                                                                                                                                                                                                                                           |                                                     |
|----------------------------------------------------|------------------------|------------|----|-----|----------|---------|----------|-----------------------------------------------------------------------------------------------------------------------------------------------------------------------------------------------------------------------------------------------------------------------------------------------------------------------------------------------------------------------------------------------------------------------------------------------------------|-----------------------------------------------------|
| carboxylic acid<br>metabolic<br>process            | biological<br>_process | GO:0019752 | 34 | 838 | 0.466485 | 0.03175 | 0.467064 | 0 LOC114299547 LOC114299955 LOC114300826 LOC114305378 LOC114307027 LOC114308176 LOC114311450 LOC114313963 LOC114315853 LOC114316175 LOC114320798                                                                                                                                                                                                                                                                                                          | m/GO:0006793                                        |
|                                                    |                        |            |    |     |          |         |          | LOC114256190 LOC114258817 LOC114263059 LOC114265902 LOC114270152 LOC114272337 LOC114276762 LOC114277939 LOC114282634 LOC114285742 LOC114285764 LOC114289079 LOC114291259 LOC114294075 LOC114296365 LOC114297323 LOC114297841 LOC114298958 LOC114302846 LOC114306527 LOC114306912 LOC114308783 LOC114310850 LOC114311067 LOC114313713 LOC114315991 LOC114316277 LOC114317494 LOC114317503 LOC114321004 LOC114321080 LOC114321594 LOC114323756 LOC114323885 | http://amigo.eneontology.org/amigo/terms/GO:0019752 |
| organophosphate<br>metabolic<br>process            | biological<br>_process | GO:0019637 | 29 | 465 | 0.717048 | 0.0001  | 0.038983 | LOC114258149 LOC114258544 LOC114261073 LOC114261918 LOC114262677 LOC114262969 LOC114268471 LOC114269944 LOC114270637 LOC114270740 LOC114274659 LOC114275394 LOC114279846 LOC114287829 LOC114288413 LOC114288720 LOC114294805 LOC114295538 LOC114297157 LOC114297323 LOC114299440 LOC114299547 LOC114299955 LOC114300826 LOC114305378 LOC114307027 LOC114313963 LOC114316175 LOC114320798                                                                  | http://amigo.eneontology.org/amigo/terms/GO:0019637 |
|                                                    |                        |            |    |     |          |         |          | LOC114260629 LOC114263018 LOC114264677 LOC114264704 LOC114266363 LOC114267438 LOC114273300 LOC114274441 LOC114274537 LOC114275505 LOC114277629 LOC114278552 LOC114280503 LOC114285072 LOC114295471 LOC114295560 LOC114301033 LOC114305423 LOC114306769 LOC114309735 LOC114311681 LOC114315282 LOC114316831 LOC114317014 LOC114317430 LOC114317632 LOC114320128                                                                                            | http://amigo.eneontology.org/amigo/terms/GO:0043933 |
| carbohydrate<br>derivative<br>metabolic<br>process | biological<br>_process | GO:1901135 | 27 | 650 | 0.477588 | 0.04083 | 0.548858 | LOC114258544 LOC114261918 LOC114262677 LOC114266251 LOC114268471 LOC114269944 LOC114270637 LOC114270740 LOC114274659 LOC114275394 LOC114279846 LOC114282856 LOC114285290 LOC114285947 LOC114288413 LOC114288720 LOC114294805 LOC114295538 LOC114297323 LOC114297999 LOC114299440 LOC114299826 LOC114299955 LOC114301496 LOC114305378 LOC114313963 LOC114320798                                                                                            | http://amigo.eneontology.org/amigo/terms/GO:1901135 |

|                                              |                     |            |    |     |          |         |          |                                                                                                                                                                                                                                                                                                                                                   |                                                                                                                       |
|----------------------------------------------|---------------------|------------|----|-----|----------|---------|----------|---------------------------------------------------------------------------------------------------------------------------------------------------------------------------------------------------------------------------------------------------------------------------------------------------------------------------------------------------|-----------------------------------------------------------------------------------------------------------------------|
| cellular component biogenesis                | biological _process | GO:0044085 | 26 | 503 | 0.594304 | 0.00347 | 0.188752 | LOC114260629 LOC114260756 LOC114263018 LOC114266363 LOC114267438 LOC114270680 LOC114273300 LOC114273602 LOC114274441 LOC114274537 LOC114275505 LOC114278552 LOC114280503 LOC114285072 LOC114295560 LOC114296189 LOC114301033 LOC114301641 LOC114306769 LOC114308420 LOC114309735 LOC114311226 LOC114312304 LOC114315282 LOC114317430 LOC114322299 | <a href="http://amigo.eneontology.org/amigo/terms/GO:0044085">http://amigo.eneontology.org/amigo/terms/GO:0044085</a> |
| cellular amino acid metabolic process        | biological _process | GO:0006520 | 26 | 523 | 0.571577 | 0.00575 | 0.24906  | LOC114256190 LOC114263059 LOC114265902 LOC114276762 LOC114277939 LOC114282634 LOC114285742 LOC114285764 LOC114289079 LOC114291259 LOC114296365 LOC114297841 LOC114302846 LOC114306912 LOC114308783 LOC114310850 LOC114311067 LOC114313713 LOC114315991 LOC114316277 LOC114317494 LOC114317503 LOC114321004 LOC114321080 LOC114321594 LOC114323756 | <a href="http://amigo.eneontology.org/amigo/terms/GO:0006520">http://amigo.eneontology.org/amigo/terms/GO:0006520</a> |
| RNA processing                               | biological _process | GO:0006396 | 25 | 441 | 0.651785 | 0.0012  | 0.097458 | LOC114256493 LOC114259356 LOC114260756 LOC114262452 LOC114264726 LOC114270680 LOC114274537 LOC114274726 LOC114285167 LOC114288404 LOC114296189 LOC114299064 LOC114304829 LOC114307624 LOC114307852 LOC114308810 LOC114309962 LOC114310023 LOC114311226 LOC114312304 LOC114313677 LOC114314245 LOC114316352 LOC114317813 LOC114322392              | <a href="http://amigo.eneontology.org/amigo/terms/GO:0006396">http://amigo.eneontology.org/amigo/terms/GO:0006396</a> |
| small molecule biosynthetic process          | biological _process | GO:0044283 | 25 | 524 | 0.548545 | 0.01094 | 0.308297 | LOC114258817 LOC114265902 LOC114270152 LOC114282634 LOC114285764 LOC114291259 LOC114294164 LOC114296365 LOC114297841 LOC114302846 LOC114306527 LOC114309520 LOC114310242 LOC114310850 LOC114311067 LOC114313713 LOC114314310 LOC114315991 LOC114317503 LOC114318308 LOC114321004 LOC114321594 LOC114323396 LOC114323756 LOC114323885              | <a href="http://amigo.eneontology.org/amigo/terms/GO:0044283">http://amigo.eneontology.org/amigo/terms/GO:0044283</a> |
| carbohydrate derivative biosynthetic process | biological _process | GO:1901137 | 21 | 424 | 0.569451 | 0.01284 | 0.319296 | LOC114262677 LOC114266251 LOC114269944 LOC114270637 LOC114270740 LOC114274659 LOC114279846 LOC114282856 LOC114285290 LOC114285947 LOC114288413 LOC114288720 LOC114294805 LOC114295538 LOC114297999 LOC114299440 LOC114299826 LOC114299955 LOC114301496 LOC114313963 LOC114320798                                                                  | <a href="http://amigo.eneontology.org/amigo/terms/GO:1901137">http://amigo.eneontology.org/amigo/terms/GO:1901137</a> |



|                                              |                        |            |    |     |          |         |          |                                                                                                                                                                                                                                                                     |                                                                                                                       |
|----------------------------------------------|------------------------|------------|----|-----|----------|---------|----------|---------------------------------------------------------------------------------------------------------------------------------------------------------------------------------------------------------------------------------------------------------------------|-----------------------------------------------------------------------------------------------------------------------|
| cellular lipid<br>metabolic<br>process       | biological<br>_process | GO:0044255 | 20 | 435 | 0.52862  | 0.03018 | 0.452507 | LOC114258149 LOC114258817 LOC114263723 LOC114266251 LOC114269705 LOC114270152 LOC114270285 LOC114270637 LOC114274659 LOC114276617 LOC114287829 LOC114288720 LOC114299440 LOC114300826 LOC114306527 LOC114307027 LOC114309241 LOC114311679 LOC114316533 LOC114323885 | <a href="http://amigo.geneontology.org/amigo/term/GO:0044255">http://amigo.geneontology.org/amigo/term/GO:0044255</a> |
| organophosphate<br>biosynthetic<br>process   | biological<br>_process | GO:0090407 | 19 | 258 | 0.846715 | 0.00021 | 0.040933 | LOC114258149 LOC114261073 LOC114262677 LOC114262969 LOC114269944 LOC114270637 LOC114270740 LOC114274659 LOC114279846 LOC114288413 LOC114288720 LOC114294805 LOC114295538 LOC114297157 LOC114299440 LOC114299955 LOC114300826 LOC114313963 LOC114320798              | <a href="http://amigo.geneontology.org/amigo/term/GO:0090407">http://amigo.geneontology.org/amigo/term/GO:0090407</a> |
| protein complex<br>subunit<br>organization   | biological<br>_process | GO:0071822 | 19 | 284 | 0.769198 | 0.00068 | 0.083712 | LOC114260629 LOC114263018 LOC114264677 LOC114264704 LOC114266363 LOC114273300 LOC114274441 LOC114275505 LOC114277629 LOC114278552 LOC114280503 LOC114285072 LOC114295471 LOC114295560 LOC114306769 LOC114309735 LOC114315282 LOC114317430 LOC114317632              | <a href="http://amigo.geneontology.org/amigo/term/GO:0071822">http://amigo.geneontology.org/amigo/term/GO:0071822</a> |
| single-organism<br>organelle<br>organization | biological<br>_process | GO:1902589 | 19 | 290 | 0.753284 | 0.00088 | 0.089492 | LOC114260629 LOC114264677 LOC114264704 LOC114266363 LOC114273300 LOC114275505 LOC114277629 LOC114284490 LOC114286217 LOC114286557 LOC114294661 LOC114295471 LOC114295560 LOC114299009 LOC114306769 LOC114315282 LOC114317014 LOC114317545 LOC114317632              | <a href="http://amigo.geneontology.org/amigo/term/GO:1902589">http://amigo.geneontology.org/amigo/term/GO:1902589</a> |
| cellular<br>component<br>assembly            | biological<br>_process | GO:0022607 | 18 | 384 | 0.538945 | 0.03269 | 0.471987 | LOC114260629 LOC114263018 LOC114266363 LOC114267438 LOC114273300 LOC114274441 LOC114274537 LOC114275505 LOC114278552 LOC114280503 LOC114285072 LOC114295560 LOC114301033 LOC114306769 LOC114309735 LOC114315282 LOC114317430 LOC114322299                           | <a href="http://amigo.geneontology.org/amigo/term/GO:0022607">http://amigo.geneontology.org/amigo/term/GO:0022607</a> |

|                                                |                        |            |    |     |          |         |          |                                                                                                                                                                                                                              |                                                                                                                       |
|------------------------------------------------|------------------------|------------|----|-----|----------|---------|----------|------------------------------------------------------------------------------------------------------------------------------------------------------------------------------------------------------------------------------|-----------------------------------------------------------------------------------------------------------------------|
| macromolecular<br>complex<br>assembly          | biological<br>_process | GO:0065003 | 17 | 289 | 0.676323 | 0.00488 | 0.215806 | LOC114260629 LOC114263018 LOC114266363 LOC114267438 LOC114273300 LOC114274441 LOC114274537 LOC114275505 LOC114278552 LOC114280503 LOC114285072 LOC114295560 LOC114301033 LOC114306769 LOC114309735 LOC114315282 LOC114317430 | <a href="http://amigo.geneontology.org/amigo/term/GO:0065003">http://amigo.geneontology.org/amigo/term/GO:0065003</a> |
| ncRNA<br>metabolic<br>process                  | biological<br>_process | GO:0034660 | 17 | 317 | 0.616585 | 0.01176 | 0.319296 | LOC114256190 LOC114260756 LOC114262452 LOC114270680 LOC114276762 LOC114285167 LOC114285742 LOC114289079 LOC114296189 LOC114306912 LOC114308810 LOC114310023 LOC114311226 LOC114312304 LOC114313677 LOC114316277 LOC114316352 | <a href="http://amigo.geneontology.org/amigo/term/GO:0034660">http://amigo.geneontology.org/amigo/term/GO:0034660</a> |
| alpha-amino acid<br>metabolic<br>process       | biological<br>_process | GO:1901605 | 16 | 286 | 0.643216 | 0.00983 | 0.303781 | LOC114263059 LOC114265902 LOC114282634 LOC114285764 LOC114291259 LOC114297841 LOC114302846 LOC114310850 LOC114311067 LOC114313713 LOC114315991 LOC114317494 LOC114317503 LOC114321004 LOC114321594 LOC114323756              | <a href="http://amigo.geneontology.org/amigo/term/GO:1901605">http://amigo.geneontology.org/amigo/term/GO:1901605</a> |
| chromosome<br>organization                     | biological<br>_process | GO:0051276 | 15 | 234 | 0.737019 | 0.00364 | 0.193499 | LOC114267817 LOC114274441 LOC114285072 LOC114285852 LOC114292214 LOC114294776 LOC114299009 LOC114300977 LOC114301033 LOC114305423 LOC114309735 LOC114311681 LOC114316831 LOC114317014 LOC114320128                           | <a href="http://amigo.geneontology.org/amigo/term/GO:0051276">http://amigo.geneontology.org/amigo/term/GO:0051276</a> |
| cellular amino<br>acid biosynthetic<br>process | biological<br>_process | GO:0008652 | 15 | 260 | 0.663317 | 0.00939 | 0.303781 | LOC114265902 LOC114282634 LOC114285764 LOC114291259 LOC114296365 LOC114297841 LOC114302846 LOC114310850 LOC114311067 LOC114313713 LOC114315991 LOC114317503 LOC114321004 LOC114321594 LOC114323756                           | <a href="http://amigo.geneontology.org/amigo/term/GO:0008652">http://amigo.geneontology.org/amigo/term/GO:0008652</a> |

|                                                                     |                        |            |    |     |          |         |          |                                                                                                                                                                                                    |                                                                                                                       |
|---------------------------------------------------------------------|------------------------|------------|----|-----|----------|---------|----------|----------------------------------------------------------------------------------------------------------------------------------------------------------------------------------------------------|-----------------------------------------------------------------------------------------------------------------------|
| nucleotide<br>metabolic<br>process                                  | biological<br>_process | GO:0009117 | 15 | 264 | 0.653267 | 0.0107  | 0.305211 | LOC114258544 LOC114261073 LOC114261918 LOC114262677 LOC114269944 LOC114270740 LOC114279846 LOC114288413 LOC114294805 LOC114295538 LOC114297323 LOC114299955 LOC114313963 LOC114316175 LOC114320798 | <a href="http://amigo.geneontology.org/amigo/term/GO:0009117">http://amigo.geneontology.org/amigo/term/GO:0009117</a> |
| nucleoside<br>phosphate<br>metabolic<br>process                     | biological<br>_process | GO:0006753 | 15 | 275 | 0.627136 | 0.01507 | 0.326377 | LOC114258544 LOC114261073 LOC114261918 LOC114262677 LOC114269944 LOC114270740 LOC114279846 LOC114288413 LOC114294805 LOC114295538 LOC114297323 LOC114299955 LOC114313963 LOC114316175 LOC114320798 | <a href="http://amigo.geneontology.org/amigo/term/GO:0006753">http://amigo.geneontology.org/amigo/term/GO:0006753</a> |
| nucleobase-<br>containing small<br>molecule<br>metabolic<br>process | biological<br>_process | GO:0055086 | 15 | 315 | 0.5475   | 0.04313 | 0.563581 | LOC114258544 LOC114261073 LOC114261918 LOC114262677 LOC114269944 LOC114270740 LOC114279846 LOC114288413 LOC114294805 LOC114295538 LOC114297323 LOC114299955 LOC114313963 LOC114316175 LOC114320798 | <a href="http://amigo.geneontology.org/amigo/term/GO:0055086">http://amigo.geneontology.org/amigo/term/GO:0055086</a> |
| protein complex<br>assembly                                         | biological<br>_process | GO:0006461 | 14 | 198 | 0.812954 | 0.00201 | 0.142466 | LOC114260629 LOC114263018 LOC114266363 LOC114273300 LOC114274441 LOC114275505 LOC114278552 LOC114280503 LOC114285072 LOC114295560 LOC114306769 LOC114309735 LOC114315282 LOC114317430              | <a href="http://amigo.geneontology.org/amigo/term/GO:0006461">http://amigo.geneontology.org/amigo/term/GO:0006461</a> |
| protein complex<br>biogenesis                                       | biological<br>_process | GO:0070271 | 14 | 198 | 0.812954 | 0.00201 | 0.142466 | LOC114260629 LOC114263018 LOC114266363 LOC114273300 LOC114274441 LOC114275505 LOC114278552 LOC114280503 LOC114285072 LOC114295560 LOC114306769 LOC114309735 LOC114315282 LOC114317430              | <a href="http://amigo.geneontology.org/amigo/term/GO:0070271">http://amigo.geneontology.org/amigo/term/GO:0070271</a> |

|                                           |                     |            |    |     |          |         |          |                                                                                                                                                                                       |                                                                                                                       |
|-------------------------------------------|---------------------|------------|----|-----|----------|---------|----------|---------------------------------------------------------------------------------------------------------------------------------------------------------------------------------------|-----------------------------------------------------------------------------------------------------------------------|
| alpha-amino acid biosynthetic process     | biological _process | GO:1901607 | 14 | 233 | 0.690836 | 0.00848 | 0.303781 | LOC114265902 LOC114282634 LOC114285764 LOC114291259 LOC114297841 LOC114302846 LOC114310850 LOC114311067 LOC114313713 LOC114315991 LOC114317503 LOC114321004 LOC114321594 LOC114323756 | <a href="http://amigo.geneontology.org/amigo/term/GO:1901607">http://amigo.geneontology.org/amigo/term/GO:1901607</a> |
| cellular macromolecular complex assembly  | biological _process | GO:0034622 | 14 | 243 | 0.662407 | 0.01198 | 0.319296 | LOC114260629 LOC114263018 LOC114267438 LOC114274441 LOC114274537 LOC114275505 LOC114278552 LOC114280503 LOC114285072 LOC114301033 LOC114306769 LOC114309735 LOC114315282 LOC114317430 | <a href="http://amigo.geneontology.org/amigo/term/GO:0034622">http://amigo.geneontology.org/amigo/term/GO:0034622</a> |
| cytoskeleton organization                 | biological _process | GO:0007010 | 13 | 155 | 0.964306 | 0.00061 | 0.079266 | LOC114260629 LOC114264677 LOC114264704 LOC114266363 LOC114273300 LOC114275505 LOC114277629 LOC114294661 LOC114295471 LOC114295560 LOC114306769 LOC114315282 LOC114317632              | <a href="http://amigo.geneontology.org/amigo/term/GO:0007010">http://amigo.geneontology.org/amigo/term/GO:0007010</a> |
| movement of cell or subcellular component | biological _process | GO:0006928 | 12 | 169 | 0.81639  | 0.00397 | 0.197571 | LOC114258208 LOC114258475 LOC114264481 LOC114269649 LOC114272475 LOC114272975 LOC114285182 LOC114290278 LOC114291143 LOC114303967 LOC114308217 LOC114323601                           | <a href="http://amigo.geneontology.org/amigo/term/GO:0006928">http://amigo.geneontology.org/amigo/term/GO:0006928</a> |
| microtubule-based movement                | biological _process | GO:0007018 | 12 | 169 | 0.81639  | 0.00397 | 0.197571 | LOC114258208 LOC114258475 LOC114264481 LOC114269649 LOC114272475 LOC114272975 LOC114285182 LOC114290278 LOC114291143 LOC114303967 LOC114308217 LOC114323601                           | <a href="http://amigo.geneontology.org/amigo/term/GO:0007018">http://amigo.geneontology.org/amigo/term/GO:0007018</a> |

|                                           |                     |            |    |     |          |         |          |                                                                                                                                                |                                                                                                                       |
|-------------------------------------------|---------------------|------------|----|-----|----------|---------|----------|------------------------------------------------------------------------------------------------------------------------------------------------|-----------------------------------------------------------------------------------------------------------------------|
| cofactor                                  |                     |            |    |     |          |         |          | LOC114261073 LOC114262969 LOC114284055 LOC114290548 LOC114295538 LOC114297                                                                     | <a href="http://amigo.geneontology.org/amigo/term/GO:0051186">http://amigo.geneontology.org/amigo/term/GO:0051186</a> |
| metabolic process                         | biological _process | GO:0051186 | 12 | 218 | 0.63289  | 0.02621 | 0.442436 | 157 LOC114297323 LOC114310242 LOC114313963 LOC114316175 LOC114320798 LOC114323396                                                              |                                                                                                                       |
| nucleotide biosynthetic process           | biological _process | GO:0009165 | 11 | 144 | 0.878281 | 0.00328 | 0.182665 | LOC114261073 LOC114262677 LOC114269944 LOC114270740 LOC114279846 LOC114288413 LOC114294805 LOC114295538 LOC114299955 LOC114313963 LOC114320798 | <a href="http://amigo.geneontology.org/amigo/term/GO:0009165">http://amigo.geneontology.org/amigo/term/GO:0009165</a> |
| nucleoside phosphate biosynthetic process | biological _process | GO:1901293 | 11 | 144 | 0.878281 | 0.00328 | 0.182665 | LOC114261073 LOC114262677 LOC114269944 LOC114270740 LOC114279846 LOC114288413 LOC114294805 LOC114295538 LOC114299955 LOC114313963 LOC114320798 | <a href="http://amigo.geneontology.org/amigo/term/GO:1901293">http://amigo.geneontology.org/amigo/term/GO:1901293</a> |
| ncRNA processing                          | biological _process | GO:0034470 | 11 | 158 | 0.800458 | 0.00659 | 0.280255 | LOC114260756 LOC114262452 LOC114270680 LOC114285167 LOC114296189 LOC114308810 LOC114310023 LOC114311226 LOC114312304 LOC114313677 LOC114316352 | <a href="http://amigo.geneontology.org/amigo/term/GO:0034470">http://amigo.geneontology.org/amigo/term/GO:0034470</a> |
| coenzyme metabolic process                | biological _process | GO:0006732 | 11 | 165 | 0.7665   | 0.00901 | 0.303781 | LOC114261073 LOC114262969 LOC114290548 LOC114295538 LOC114297157 LOC114297323 LOC114310242 LOC114313963 LOC114316175 LOC114320798 LOC114323396 | <a href="http://amigo.geneontology.org/amigo/term/GO:0006732">http://amigo.geneontology.org/amigo/term/GO:0006732</a> |

|                                         |                        |            |    |     |          |         |          |                                                                                                                                   |                                                                                                                       |
|-----------------------------------------|------------------------|------------|----|-----|----------|---------|----------|-----------------------------------------------------------------------------------------------------------------------------------|-----------------------------------------------------------------------------------------------------------------------|
| cofactor<br>biosynthetic<br>process     | biological<br>_process | GO:0051188 | 10 | 129 | 0.891279 | 0.00447 | 0.21372  | LOC114261073 LOC114262969 LOC114284055 LOC114290548 LOC114295538 LOC114297157 LOC114310242 LOC114313963 LOC114320798 LOC114323396 | <a href="http://amigo.geneontology.org/amigo/term/GO:0051188">http://amigo.geneontology.org/amigo/term/GO:0051188</a> |
| coenzyme<br>biosynthetic<br>process     | biological<br>_process | GO:0009108 | 9  | 99  | 1.045227 | 0.00238 | 0.155728 | LOC114261073 LOC114262969 LOC114290548 LOC114295538 LOC114297157 LOC114310242 LOC114313963 LOC114320798 LOC114323396              | <a href="http://amigo.geneontology.org/amigo/term/GO:0009108">http://amigo.geneontology.org/amigo/term/GO:0009108</a> |
| chromatin<br>organization               | biological<br>_process | GO:0006325 | 8  | 107 | 0.859626 | 0.01289 | 0.319296 | LOC114274441 LOC114285072 LOC114305423 LOC114309735 LOC114311681 LOC114316831 LOC114317014 LOC114320128                           | <a href="http://amigo.geneontology.org/amigo/term/GO:0006325">http://amigo.geneontology.org/amigo/term/GO:0006325</a> |
| cellular protein<br>complex<br>assembly | biological<br>_process | GO:0043623 | 8  | 107 | 0.859626 | 0.01289 | 0.319296 | LOC114260629 LOC114263018 LOC114275505 LOC114278552 LOC114280503 LOC114306769 LOC114315282 LOC114317430                           | <a href="http://amigo.geneontology.org/amigo/term/GO:0043623">http://amigo.geneontology.org/amigo/term/GO:0043623</a> |
| glycerolipid<br>metabolic<br>process    | biological<br>_process | GO:0046486 | 8  | 125 | 0.73584  | 0.0298  | 0.449692 | LOC114258149 LOC114270637 LOC114274659 LOC114276617 LOC114287829 LOC114288720 LOC114299440 LOC114307027                           | <a href="http://amigo.geneontology.org/amigo/term/GO:0046486">http://amigo.geneontology.org/amigo/term/GO:0046486</a> |

|                                                       |                        |            |   |     |          |         |          |                                                                                                         |                                                                                                                       |
|-------------------------------------------------------|------------------------|------------|---|-----|----------|---------|----------|---------------------------------------------------------------------------------------------------------|-----------------------------------------------------------------------------------------------------------------------|
| phospholipid<br>metabolic<br>process                  | biological<br>_process | GO:0006644 | 8 | 127 | 0.724252 | 0.03233 | 0.471987 | LOC114258149 LOC114270637 LOC114274659 LOC114287829 LOC114288720 LOC114299440 LOC114300826 LOC114307027 | <a href="http://amigo.geneontology.org/amigo/term/GO:0006644">http://amigo.geneontology.org/amigo/term/GO:0006644</a> |
| DNA<br>conformation<br>change                         | biological<br>_process | GO:0071103 | 8 | 132 | 0.696818 | 0.03928 | 0.533103 | LOC114267817 LOC114274441 LOC114285072 LOC114285852 LOC114292214 LOC114294776 LOC114300977 LOC114309735 | <a href="http://amigo.geneontology.org/amigo/term/GO:0071103">http://amigo.geneontology.org/amigo/term/GO:0071103</a> |
| aromatic amino<br>acid family<br>metabolic<br>process | biological<br>_process | GO:0009072 | 7 | 52  | 1.547739 | 0.00073 | 0.085374 | LOC114265902 LOC114277939 LOC114296365 LOC114313713 LOC114317494 LOC114317503 LOC114323756              | <a href="http://amigo.geneontology.org/amigo/term/GO:0009072">http://amigo.geneontology.org/amigo/term/GO:0009072</a> |
| microtubule<br>cytoskeleton<br>organization           | biological<br>_process | GO:0000226 | 7 | 53  | 1.518537 | 0.00082 | 0.089492 | LOC114260629 LOC114266363 LOC114273300 LOC114294661 LOC114295471 LOC114295560 LOC114315282              | <a href="http://amigo.geneontology.org/amigo/term/GO:0000226">http://amigo.geneontology.org/amigo/term/GO:0000226</a> |
| oligosaccharide<br>metabolic<br>process               | biological<br>_process | GO:0009311 | 7 | 81  | 0.993611 | 0.00926 | 0.303781 | LOC114280147 LOC114285947 LOC114289014 LOC114289395 LOC114291008 LOC114292999 LOC114303354              | <a href="http://amigo.geneontology.org/amigo/term/GO:0009311">http://amigo.geneontology.org/amigo/term/GO:0009311</a> |

|                                                              |                        |            |   |    |          |         |          |                                                                                            |                                                                                                                       |
|--------------------------------------------------------------|------------------------|------------|---|----|----------|---------|----------|--------------------------------------------------------------------------------------------|-----------------------------------------------------------------------------------------------------------------------|
| purine<br>ribonucleotide<br>biosynthetic<br>process          | biological<br>_process | GO:0009152 | 7 | 83 | 0.969668 | 0.01052 | 0.303781 | LOC114262677 LOC114269944 LOC114270740 LOC114279846 LOC114295538 LOC114313963 LOC114320798 | <a href="http://amigo.geneontology.org/amigo/term/GO:0009152">http://amigo.geneontology.org/amigo/term/GO:0009152</a> |
| ribonucleotide<br>biosynthetic<br>process                    | biological<br>_process | GO:0009260 | 7 | 83 | 0.969668 | 0.01052 | 0.303781 | LOC114262677 LOC114269944 LOC114270740 LOC114279846 LOC114295538 LOC114313963 LOC114320798 | <a href="http://amigo.geneontology.org/amigo/term/GO:0009260">http://amigo.geneontology.org/amigo/term/GO:0009260</a> |
| ribose phosphate<br>biosynthetic<br>process                  | biological<br>_process | GO:0046390 | 7 | 83 | 0.969668 | 0.01052 | 0.303781 | LOC114262677 LOC114269944 LOC114270740 LOC114279846 LOC114295538 LOC114313963 LOC114320798 | <a href="http://amigo.geneontology.org/amigo/term/GO:0046390">http://amigo.geneontology.org/amigo/term/GO:0046390</a> |
| purine nucleotide<br>biosynthetic<br>process                 | biological<br>_process | GO:0006164 | 7 | 87 | 0.925086 | 0.01342 | 0.319296 | LOC114262677 LOC114269944 LOC114270740 LOC114279846 LOC114295538 LOC114313963 LOC114320798 | <a href="http://amigo.geneontology.org/amigo/term/GO:0006164">http://amigo.geneontology.org/amigo/term/GO:0006164</a> |
| purine-<br>containing<br>compound<br>biosynthetic<br>process | biological<br>_process | GO:0072522 | 7 | 95 | 0.847184 | 0.02087 | 0.394823 | LOC114262677 LOC114269944 LOC114270740 LOC114279846 LOC114295538 LOC114313963 LOC114320798 | <a href="http://amigo.geneontology.org/amigo/term/GO:0072522">http://amigo.geneontology.org/amigo/term/GO:0072522</a> |



|                                                 |                        |            |   |     |          |         |          |                                                                                            |                                                                                                                       |
|-------------------------------------------------|------------------------|------------|---|-----|----------|---------|----------|--------------------------------------------------------------------------------------------|-----------------------------------------------------------------------------------------------------------------------|
| membrane lipid<br>metabolic<br>process          | biological<br>_process | GO:0006643 | 7 | 98  | 0.82125  | 0.02429 | 0.442436 | LOC114266251 LOC114270637 LOC114274659 LOC114288720 LOC114299440 LOC114311679 LOC114316533 | <a href="http://amigo.geneontology.org/amigo/term/GO:0006643">http://amigo.geneontology.org/amigo/term/GO:0006643</a> |
| glycerophospholipid metabolic<br>process        | biological<br>_process | GO:0006650 | 7 | 112 | 0.718593 | 0.04529 | 0.582474 | LOC114258149 LOC114270637 LOC114274659 LOC114287829 LOC114288720 LOC114299440 LOC114307027 | <a href="http://amigo.geneontology.org/amigo/term/GO:0006650">http://amigo.geneontology.org/amigo/term/GO:0006650</a> |
| DNA-templated<br>transcription,<br>initiation   | biological<br>_process | GO:0006352 | 6 | 52  | 1.326634 | 0.00387 | 0.197571 | LOC114257012 LOC114267438 LOC114273431 LOC114276229 LOC114289658 LOC114291770              | <a href="http://amigo.geneontology.org/amigo/term/GO:0006352">http://amigo.geneontology.org/amigo/term/GO:0006352</a> |
| cellular biogenic<br>amine metabolic<br>process | biological<br>_process | GO:0006576 | 6 | 59  | 1.169237 | 0.00722 | 0.295601 | LOC114298543 LOC114306956 LOC114307001 LOC114317494 LOC114318161 LOC114318164              | <a href="http://amigo.geneontology.org/amigo/term/GO:0006576">http://amigo.geneontology.org/amigo/term/GO:0006576</a> |
| cellular amine<br>metabolic<br>process          | biological<br>_process | GO:0044106 | 6 | 59  | 1.169237 | 0.00722 | 0.295601 | LOC114298543 LOC114306956 LOC114307001 LOC114317494 LOC114318161 LOC114318164              | <a href="http://amigo.geneontology.org/amigo/term/GO:0044106">http://amigo.geneontology.org/amigo/term/GO:0044106</a> |

|                                              |                        |            |   |    |          |         |          |                                                                               |                                                                                                                       |
|----------------------------------------------|------------------------|------------|---|----|----------|---------|----------|-------------------------------------------------------------------------------|-----------------------------------------------------------------------------------------------------------------------|
| disaccharide<br>metabolic<br>process         | biological<br>_process | GO:0005984 | 6 | 61 | 1.130901 | 0.00848 | 0.303781 | LOC114280147 LOC114289014 LOC114289395 LOC114291008 LOC114292999 LOC114303354 | <a href="http://amigo.geneontology.org/amigo/term/GO:0005984">http://amigo.geneontology.org/amigo/term/GO:0005984</a> |
| sulfur amino acid<br>biosynthetic<br>process | biological<br>_process | GO:0000097 | 6 | 66 | 1.045227 | 0.0123  | 0.319296 | LOC114282634 LOC114285764 LOC114297841 LOC114310850 LOC114321004 LOC114321594 | <a href="http://amigo.geneontology.org/amigo/term/GO:0000097">http://amigo.geneontology.org/amigo/term/GO:0000097</a> |
| macromolecule<br>methylation                 | biological<br>_process | GO:0043414 | 6 | 66 | 1.045227 | 0.0123  | 0.319296 | LOC114260756 LOC114262452 LOC114307025 LOC114313578 LOC114317894 LOC114323269 | <a href="http://amigo.geneontology.org/amigo/term/GO:0043414">http://amigo.geneontology.org/amigo/term/GO:0043414</a> |
| sulfur amino acid<br>metabolic<br>process    | biological<br>_process | GO:0000096 | 6 | 67 | 1.029626 | 0.01319 | 0.319296 | LOC114282634 LOC114285764 LOC114297841 LOC114310850 LOC114321004 LOC114321594 | <a href="http://amigo.geneontology.org/amigo/term/GO:0000096">http://amigo.geneontology.org/amigo/term/GO:0000096</a> |
| methylation                                  | biological<br>_process | GO:0032259 | 6 | 67 | 1.029626 | 0.01319 | 0.319296 | LOC114260756 LOC114262452 LOC114307025 LOC114313578 LOC114317894 LOC114323269 | <a href="http://amigo.geneontology.org/amigo/term/GO:0032259">http://amigo.geneontology.org/amigo/term/GO:0032259</a> |

|                                        |                     |            |   |    |          |         |          |                                                                               |                                                                                                                       |
|----------------------------------------|---------------------|------------|---|----|----------|---------|----------|-------------------------------------------------------------------------------|-----------------------------------------------------------------------------------------------------------------------|
| mitochondrion organization             | biological _process | GO:0007005 | 6 | 78 | 0.884423 | 0.02607 | 0.442436 | LOC114270950 LOC114277383 LOC114284490 LOC114286217 LOC114286557 LOC114317430 | <a href="http://amigo.geneontology.org/amigo/term/GO:0007005">http://amigo.geneontology.org/amigo/term/GO:0007005</a> |
| phosphatidylinositol metabolic process | biological _process | GO:0046488 | 6 | 86 | 0.802151 | 0.03943 | 0.533103 | LOC114270637 LOC114274659 LOC114287829 LOC114288720 LOC114299440 LOC114307027 | <a href="http://amigo.geneontology.org/amigo/term/GO:0046488">http://amigo.geneontology.org/amigo/term/GO:0046488</a> |
| actin filament organization            | biological _process | GO:0007015 | 6 | 89 | 0.775112 | 0.04538 | 0.582474 | LOC114264677 LOC114264704 LOC114275505 LOC114277629 LOC114306769 LOC114317632 | <a href="http://amigo.geneontology.org/amigo/term/GO:0007015">http://amigo.geneontology.org/amigo/term/GO:0007015</a> |
| glycerolipid biosynthetic process      | biological _process | GO:0045017 | 6 | 89 | 0.775112 | 0.04538 | 0.582474 | LOC114258149 LOC114270637 LOC114274659 LOC114276617 LOC114288720 LOC114299440 | <a href="http://amigo.geneontology.org/amigo/term/GO:0045017">http://amigo.geneontology.org/amigo/term/GO:0045017</a> |
| small molecule catabolic process       | biological _process | GO:0044282 | 6 | 91 | 0.758076 | 0.04965 | 0.595672 | LOC114258043 LOC114263059 LOC114272337 LOC114275199 LOC114298958 LOC114321080 | <a href="http://amigo.geneontology.org/amigo/term/GO:0044282">http://amigo.geneontology.org/amigo/term/GO:0044282</a> |

|                                                 |                     |            |   |    |          |         |          |                                                                  |                                                                                                                       |
|-------------------------------------------------|---------------------|------------|---|----|----------|---------|----------|------------------------------------------------------------------|-----------------------------------------------------------------------------------------------------------------------|
| aromatic amino acid family biosynthetic process | biological _process | GO:0009073 | 5 | 33 | 1.742044 | 0.00248 | 0.155728 | LOC114265902 LOC114296365 LOC114313713 LOC114317503 LOC114323756 | <a href="http://amigo.geneontology.org/amigo/term/GO:0009073">http://amigo.geneontology.org/amigo/term/GO:0009073</a> |
| polyamine metabolic process                     | biological _process | GO:0006595 | 5 | 38 | 1.512828 | 0.00466 | 0.21372  | LOC114298543 LOC114306956 LOC114307001 LOC114318161 LOC114318164 | <a href="http://amigo.geneontology.org/amigo/term/GO:0006595">http://amigo.geneontology.org/amigo/term/GO:0006595</a> |
| polyamine biosynthetic process                  | biological _process | GO:0006596 | 5 | 38 | 1.512828 | 0.00466 | 0.21372  | LOC114298543 LOC114306956 LOC114307001 LOC114318161 LOC114318164 | <a href="http://amigo.geneontology.org/amigo/term/GO:0006596">http://amigo.geneontology.org/amigo/term/GO:0006596</a> |
| amine biosynthetic process                      | biological _process | GO:0009309 | 5 | 49 | 1.173214 | 0.01365 | 0.319296 | LOC114298543 LOC114306956 LOC114307001 LOC114318161 LOC114318164 | <a href="http://amigo.geneontology.org/amigo/term/GO:0009309">http://amigo.geneontology.org/amigo/term/GO:0009309</a> |
| cellular biogenic amine biosynthetic process    | biological _process | GO:0042401 | 5 | 49 | 1.173214 | 0.01365 | 0.319296 | LOC114298543 LOC114306956 LOC114307001 LOC114318161 LOC114318164 | <a href="http://amigo.geneontology.org/amigo/term/GO:0042401">http://amigo.geneontology.org/amigo/term/GO:0042401</a> |

|                                                |                        |            |   |    |          |         |          |                                                                  |                                                                                                                       |
|------------------------------------------------|------------------------|------------|---|----|----------|---------|----------|------------------------------------------------------------------|-----------------------------------------------------------------------------------------------------------------------|
| protein-DNA<br>complex<br>assembly             | biological<br>_process | GO:0065004 | 5 | 49 | 1.173214 | 0.01365 | 0.319296 | LOC114267438 LOC114274441 LOC114285072 LOC114301033 LOC114309735 | <a href="http://amigo.geneontology.org/amigo/term/GO:0065004">http://amigo.geneontology.org/amigo/term/GO:0065004</a> |
| protein-DNA<br>complex subunit<br>organization | biological<br>_process | GO:0071824 | 5 | 49 | 1.173214 | 0.01365 | 0.319296 | LOC114267438 LOC114274441 LOC114285072 LOC114301033 LOC114309735 | <a href="http://amigo.geneontology.org/amigo/term/GO:0071824">http://amigo.geneontology.org/amigo/term/GO:0071824</a> |
| glycolipid<br>biosynthetic<br>process          | biological<br>_process | GO:0009247 | 5 | 59 | 0.974364 | 0.02835 | 0.442436 | LOC114266251 LOC114270637 LOC114274659 LOC114288720 LOC114299440 | <a href="http://amigo.geneontology.org/amigo/term/GO:0009247">http://amigo.geneontology.org/amigo/term/GO:0009247</a> |
| protein import                                 | biological<br>_process | GO:0017038 | 5 | 63 | 0.912499 | 0.03626 | 0.510917 | LOC114258151 LOC114266339 LOC114277383 LOC114286557 LOC114315996 | <a href="http://amigo.geneontology.org/amigo/term/GO:0017038">http://amigo.geneontology.org/amigo/term/GO:0017038</a> |
| glycolipid<br>metabolic<br>process             | biological<br>_process | GO:0006664 | 5 | 64 | 0.898242 | 0.03843 | 0.531541 | LOC114266251 LOC114270637 LOC114274659 LOC114288720 LOC114299440 | <a href="http://amigo.geneontology.org/amigo/term/GO:0006664">http://amigo.geneontology.org/amigo/term/GO:0006664</a> |

|                                        |                        |            |   |    |          |         |          |                                                                  |                                                                                                                       |
|----------------------------------------|------------------------|------------|---|----|----------|---------|----------|------------------------------------------------------------------|-----------------------------------------------------------------------------------------------------------------------|
| liposaccharide<br>metabolic<br>process | biological<br>_process | GO:1903509 | 5 | 64 | 0.898242 | 0.03843 | 0.531541 | LOC114266251 LOC114270637 LOC114274659 LOC114288720 LOC114299440 | <a href="http://amigo.geneontology.org/amigo/term/GO:1903509">http://amigo.geneontology.org/amigo/term/GO:1903509</a> |
| rRNA processing                        | biological<br>_process | GO:0006364 | 5 | 66 | 0.871022 | 0.04301 | 0.563581 | LOC114260756 LOC114270680 LOC114296189 LOC114311226 LOC114312304 | <a href="http://amigo.geneontology.org/amigo/term/GO:0006364">http://amigo.geneontology.org/amigo/term/GO:0006364</a> |
| rRNA metabolic<br>process              | biological<br>_process | GO:0016072 | 5 | 66 | 0.871022 | 0.04301 | 0.563581 | LOC114260756 LOC114270680 LOC114296189 LOC114311226 LOC114312304 | <a href="http://amigo.geneontology.org/amigo/term/GO:0016072">http://amigo.geneontology.org/amigo/term/GO:0016072</a> |
| putrescine<br>metabolic<br>process     | biological<br>_process | GO:0009445 | 4 | 11 | 4.180907 | 0.0002  | 0.040933 | LOC114306956 LOC114307001 LOC114318161 LOC114318164              | <a href="http://amigo.geneontology.org/amigo/term/GO:0009445">http://amigo.geneontology.org/amigo/term/GO:0009445</a> |
| putrescine<br>biosynthetic<br>process  | biological<br>_process | GO:0009446 | 4 | 11 | 4.180907 | 0.0002  | 0.040933 | LOC114306956 LOC114307001 LOC114318161 LOC114318164              | <a href="http://amigo.geneontology.org/amigo/term/GO:0009446">http://amigo.geneontology.org/amigo/term/GO:0009446</a> |

|                                                                                                   |                        |            |   |    |          |         |          |                                                     |                                                                                                                       |
|---------------------------------------------------------------------------------------------------|------------------------|------------|---|----|----------|---------|----------|-----------------------------------------------------|-----------------------------------------------------------------------------------------------------------------------|
| L-phenylalanine<br>metabolic<br>process                                                           | biological<br>_process | GO:0006558 | 4 | 14 | 3.284998 | 0.00056 | 0.077049 | LOC114265902 LOC114313713 LOC114317503 LOC114323756 | <a href="http://amigo.geneontology.org/amigo/term/GO:0006558">http://amigo.geneontology.org/amigo/term/GO:0006558</a> |
| L-phenylalanine<br>biosynthetic<br>process                                                        | biological<br>_process | GO:0009094 | 4 | 14 | 3.284998 | 0.00056 | 0.077049 | LOC114265902 LOC114313713 LOC114317503 LOC114323756 | <a href="http://amigo.geneontology.org/amigo/term/GO:0009094">http://amigo.geneontology.org/amigo/term/GO:0009094</a> |
| erythrose 4-<br>phosphate/phosp<br>hoenolpyruvate<br>family amino<br>acid metabolic<br>process    | biological<br>_process | GO:1902221 | 4 | 14 | 3.284998 | 0.00056 | 0.077049 | LOC114265902 LOC114313713 LOC114317503 LOC114323756 | <a href="http://amigo.geneontology.org/amigo/term/GO:1902221">http://amigo.geneontology.org/amigo/term/GO:1902221</a> |
| erythrose 4-<br>phosphate/phosp<br>hoenolpyruvate<br>family amino<br>acid biosynthetic<br>process | biological<br>_process | GO:1902223 | 4 | 14 | 3.284998 | 0.00056 | 0.077049 | LOC114265902 LOC114313713 LOC114317503 LOC114323756 | <a href="http://amigo.geneontology.org/amigo/term/GO:1902223">http://amigo.geneontology.org/amigo/term/GO:1902223</a> |
| aromatic amino<br>acid family<br>biosynthetic<br>process,                                         | biological<br>_process | GO:0009095 | 4 | 17 | 2.705292 | 0.00125 | 0.097458 | LOC114265902 LOC114313713 LOC114317503 LOC114323756 | <a href="http://amigo.geneontology.org/amigo/term">http://amigo.geneontology.org/amigo/term</a>                       |

|                                           |                    |            |   |    |          |         |          |                                                     |                                                                                                                     |
|-------------------------------------------|--------------------|------------|---|----|----------|---------|----------|-----------------------------------------------------|---------------------------------------------------------------------------------------------------------------------|
| prephenate pathway                        |                    |            |   |    |          |         |          |                                                     | m/GO:0009095                                                                                                        |
| regulation of transmembrane transport     | biological_process | GO:0034762 | 4 | 21 | 2.189999 | 0.00287 | 0.167823 | LOC114274649 LOC114302756 LOC114306907 LOC114310246 | <a href="http://amigo.eneontology.org/amigo/term/GO:0034762">http://amigo.eneontology.org/amigo/term/GO:0034762</a> |
| regulation of ion transmembrane transport | biological_process | GO:0034765 | 4 | 21 | 2.189999 | 0.00287 | 0.167823 | LOC114274649 LOC114302756 LOC114306907 LOC114310246 | <a href="http://amigo.eneontology.org/amigo/term/GO:0034765">http://amigo.eneontology.org/amigo/term/GO:0034765</a> |
| spindle organization                      | biological_process | GO:0007051 | 4 | 27 | 1.703332 | 0.00733 | 0.295601 | LOC114266363 LOC114273300 LOC114295471 LOC114295560 | <a href="http://amigo.eneontology.org/amigo/term/GO:0007051">http://amigo.eneontology.org/amigo/term/GO:0007051</a> |
| RNA 3'-end processing                     | biological_process | GO:0031123 | 4 | 29 | 1.585861 | 0.00947 | 0.303781 | LOC114288404 LOC114307624 LOC114314245 LOC114316352 | <a href="http://amigo.eneontology.org/amigo/term/GO:0031123">http://amigo.eneontology.org/amigo/term/GO:0031123</a> |
| regulation of ion transport               | biological_process | GO:0043269 | 4 | 29 | 1.585861 | 0.00947 | 0.303781 | LOC114274649 LOC114302756 LOC114306907 LOC114310246 | <a href="http://amigo.eneontology.org/amigo/term/GO:0043269">http://amigo.eneontology.org/amigo/term/GO:0043269</a> |



|                                              |                    |            |   |    |          |         |          |                                                     |                                                                                                                       |
|----------------------------------------------|--------------------|------------|---|----|----------|---------|----------|-----------------------------------------------------|-----------------------------------------------------------------------------------------------------------------------|
|                                              |                    |            |   |    |          |         |          |                                                     | m/GO:0043269                                                                                                          |
|                                              |                    |            |   |    |          |         |          |                                                     | <a href="http://amigo.geneontology.org/amigo/term/GO:0051049">http://amigo.geneontology.org/amigo/term/GO:0051049</a> |
| regulation of transport                      | biological_process | GO:0051049 | 4 | 33 | 1.393636 | 0.0149  | 0.325711 | LOC114274649 LOC114302756 LOC114306907 LOC114310246 |                                                                                                                       |
|                                              |                    |            |   |    |          |         |          |                                                     | <a href="http://amigo.geneontology.org/amigo/term/GO:0032879">http://amigo.geneontology.org/amigo/term/GO:0032879</a> |
| regulation of localization                   | biological_process | GO:0032879 | 4 | 34 | 1.352646 | 0.01651 | 0.341742 | LOC114274649 LOC114302756 LOC114306907 LOC114310246 |                                                                                                                       |
|                                              |                    |            |   |    |          |         |          |                                                     | <a href="http://amigo.geneontology.org/amigo/term/GO:0051258">http://amigo.geneontology.org/amigo/term/GO:0051258</a> |
| protein polymerization                       | biological_process | GO:0051258 | 4 | 34 | 1.352646 | 0.01651 | 0.341742 | LOC114260629 LOC114275505 LOC114306769 LOC114315282 |                                                                                                                       |
|                                              |                    |            |   |    |          |         |          |                                                     | <a href="http://amigo.geneontology.org/amigo/term/GO:0007186">http://amigo.geneontology.org/amigo/term/GO:0007186</a> |
| G-protein coupled receptor signaling pathway | biological_process | GO:0007186 | 4 | 40 | 1.149749 | 0.02841 | 0.442436 | LOC114296826 LOC114301312 LOC114302948 LOC114319154 |                                                                                                                       |
|                                              |                    |            |   |    |          |         |          |                                                     | <a href="http://amigo.geneontology.org/amigo/term/GO:0006535">http://amigo.geneontology.org/amigo/term/GO:0006535</a> |
| cysteine biosynthetic process from serine    | biological_process | GO:0006535 | 4 | 43 | 1.069534 | 0.03586 | 0.508343 | LOC114282634 LOC114285764 LOC114297841 LOC114310850 |                                                                                                                       |

|                               |                    |            |   |    |          |         |          |                                                     |                                                                                                                                       |
|-------------------------------|--------------------|------------|---|----|----------|---------|----------|-----------------------------------------------------|---------------------------------------------------------------------------------------------------------------------------------------|
| cysteine biosynthetic process | biological_process | GO:0019344 | 4 | 43 | 1.069534 | 0.03586 | 0.508343 | LOC114282634 LOC114285764 LOC114297841 LOC114310850 | m/GO:0006535<br><a href="http://amigo.geneontology.org/amigo/term/GO:0019344">http://amigo.geneontology.org/amigo/term/GO:0019344</a> |
| cysteine metabolic process    | biological_process | GO:0006534 | 4 | 44 | 1.045227 | 0.03858 | 0.531541 | LOC114282634 LOC114285764 LOC114297841 LOC114310850 | m/GO:0006534<br><a href="http://amigo.geneontology.org/amigo/term/GO:0006534">http://amigo.geneontology.org/amigo/term/GO:0006534</a> |
| nucleocytoplasmic transport   | biological_process | GO:0006913 | 4 | 47 | 0.97851  | 0.0474  | 0.589727 | LOC114258151 LOC114266339 LOC114306396 LOC114315996 | m/GO:0006913<br><a href="http://amigo.geneontology.org/amigo/term/GO:0006913">http://amigo.geneontology.org/amigo/term/GO:0006913</a> |
| nuclear transport             | biological_process | GO:0051169 | 4 | 47 | 0.97851  | 0.0474  | 0.589727 | LOC114258151 LOC114266339 LOC114306396 LOC114315996 | m/GO:0051169<br><a href="http://amigo.geneontology.org/amigo/term/GO:0051169">http://amigo.geneontology.org/amigo/term/GO:0051169</a> |
| coenzyme A metabolic process  | biological_process | GO:0015936 | 3 | 8  | 4.31156  | 0.00123 | 0.097458 | LOC114295538 LOC114313963 LOC114320798              | m/GO:0015936<br><a href="http://amigo.geneontology.org/amigo/term/GO:0015936">http://amigo.geneontology.org/amigo/term/GO:0015936</a> |

|                                                                 |                        |            |   |    |          |         |          |                                        |                                                                                                                                       |
|-----------------------------------------------------------------|------------------------|------------|---|----|----------|---------|----------|----------------------------------------|---------------------------------------------------------------------------------------------------------------------------------------|
| coenzyme A<br>biosynthetic<br>process                           | biological<br>_process | GO:0015937 | 3 | 8  | 4.31156  | 0.00123 | 0.097458 | LOC114295538 LOC114313963 LOC114320798 | m/GO:0015936<br><a href="http://amigo.geneontology.org/amigo/term/GO:0015937">http://amigo.geneontology.org/amigo/term/GO:0015937</a> |
| nucleoside<br>bisphosphate<br>biosynthetic<br>process           | biological<br>_process | GO:0033866 | 3 | 8  | 4.31156  | 0.00123 | 0.097458 | LOC114295538 LOC114313963 LOC114320798 | <a href="http://amigo.geneontology.org/amigo/term/GO:0033866">http://amigo.geneontology.org/amigo/term/GO:0033866</a>                 |
| ribonucleoside<br>bisphosphate<br>biosynthetic<br>process       | biological<br>_process | GO:0034030 | 3 | 8  | 4.31156  | 0.00123 | 0.097458 | LOC114295538 LOC114313963 LOC114320798 | <a href="http://amigo.geneontology.org/amigo/term/GO:0034030">http://amigo.geneontology.org/amigo/term/GO:0034030</a>                 |
| purine<br>nucleoside<br>bisphosphate<br>biosynthetic<br>process | biological<br>_process | GO:0034033 | 3 | 8  | 4.31156  | 0.00123 | 0.097458 | LOC114295538 LOC114313963 LOC114320798 | <a href="http://amigo.geneontology.org/amigo/term/GO:0034033">http://amigo.geneontology.org/amigo/term/GO:0034033</a>                 |
| regulation of<br>DNA metabolic<br>process                       | biological<br>_process | GO:0051052 | 3 | 10 | 3.449248 | 0.00253 | 0.155728 | LOC114302295 LOC114307025 LOC114310205 | <a href="http://amigo.geneontology.org/amigo/term/GO:0051052">http://amigo.geneontology.org/amigo/term/GO:0051052</a>                 |

|                                               |                    |            |   |    |         |         |          |                                        |                                                                                                                       |
|-----------------------------------------------|--------------------|------------|---|----|---------|---------|----------|----------------------------------------|-----------------------------------------------------------------------------------------------------------------------|
|                                               |                    |            |   |    |         |         |          |                                        | m/GO:0051052                                                                                                          |
|                                               |                    |            |   |    |         |         |          |                                        | <a href="http://amigo.geneontology.org/amigo/term/GO:0006304">http://amigo.geneontology.org/amigo/term/GO:0006304</a> |
| DNA modification                              | biological_process | GO:0006304 | 3 | 16 | 2.15578 | 0.01036 | 0.303781 | LOC114307025 LOC114313578 LOC114317894 | <a href="http://amigo.geneontology.org/amigo/term/GO:0006305">http://amigo.geneontology.org/amigo/term/GO:0006305</a> |
| DNA alkylation                                | biological_process | GO:0006305 | 3 | 16 | 2.15578 | 0.01036 | 0.303781 | LOC114307025 LOC114313578 LOC114317894 | <a href="http://amigo.geneontology.org/amigo/term/GO:0006306">http://amigo.geneontology.org/amigo/term/GO:0006306</a> |
| DNA methylation                               | biological_process | GO:0006306 | 3 | 16 | 2.15578 | 0.01036 | 0.303781 | LOC114307025 LOC114313578 LOC114317894 | <a href="http://amigo.geneontology.org/amigo/term/GO:0033865">http://amigo.geneontology.org/amigo/term/GO:0033865</a> |
| nucleoside bisphosphate metabolic process     | biological_process | GO:0033865 | 3 | 16 | 2.15578 | 0.01036 | 0.303781 | LOC114295538 LOC114313963 LOC114320798 | <a href="http://amigo.geneontology.org/amigo/term/GO:0033875">http://amigo.geneontology.org/amigo/term/GO:0033875</a> |
| ribonucleoside bisphosphate metabolic process | biological_process | GO:0033875 | 3 | 16 | 2.15578 | 0.01036 | 0.303781 | LOC114295538 LOC114313963 LOC114320798 |                                                                                                                       |

|                                                  |                     |            |   |    |          |         |          |                                        |  |                                                                                                                       |
|--------------------------------------------------|---------------------|------------|---|----|----------|---------|----------|----------------------------------------|--|-----------------------------------------------------------------------------------------------------------------------|
|                                                  |                     |            |   |    |          |         |          |                                        |  | m/GO:0033875                                                                                                          |
| purine nucleoside bisphosphate metabolic process | biological _process | GO:0034032 | 3 | 16 | 2.15578  | 0.01036 | 0.303781 | LOC114295538 LOC114313963 LOC114320798 |  | <a href="http://amigo.geneontology.org/amigo/term/GO:0034032">http://amigo.geneontology.org/amigo/term/GO:0034032</a> |
| interstrand cross-link repair                    | biological _process | GO:0036297 | 3 | 16 | 2.15578  | 0.01036 | 0.303781 | LOC114277058 LOC114289925 LOC114290633 |  | <a href="http://amigo.geneontology.org/amigo/term/GO:0036297">http://amigo.geneontology.org/amigo/term/GO:0036297</a> |
| DNA methylation or demethylation                 | biological _process | GO:0044728 | 3 | 16 | 2.15578  | 0.01036 | 0.303781 | LOC114307025 LOC114313578 LOC114317894 |  | <a href="http://amigo.geneontology.org/amigo/term/GO:0044728">http://amigo.geneontology.org/amigo/term/GO:0044728</a> |
| sucrose metabolic process                        | biological _process | GO:0005985 | 3 | 17 | 2.028969 | 0.01232 | 0.319296 | LOC114280147 LOC114289014 LOC114291008 |  | <a href="http://amigo.geneontology.org/amigo/term/GO:0005985">http://amigo.geneontology.org/amigo/term/GO:0005985</a> |
| protein import into nucleus                      | biological _process | GO:0006606 | 3 | 18 | 1.916249 | 0.01447 | 0.319296 | LOC114258151 LOC114266339 LOC114315996 |  | <a href="http://amigo.geneontology.org/amigo/term/GO:0006606">http://amigo.geneontology.org/amigo/term/GO:0006606</a> |

|                                                          |                        |            |   |    |          |         |          |                                        |  |                                                                                                                       |
|----------------------------------------------------------|------------------------|------------|---|----|----------|---------|----------|----------------------------------------|--|-----------------------------------------------------------------------------------------------------------------------|
|                                                          |                        |            |   |    |          |         |          |                                        |  | m/GO:0006606                                                                                                          |
|                                                          |                        |            |   |    |          |         |          |                                        |  | 06                                                                                                                    |
|                                                          |                        |            |   |    |          |         |          |                                        |  | <a href="http://amigo.geneontology.org/amigo/term/GO:0006771">http://amigo.geneontology.org/amigo/term/GO:0006771</a> |
| riboflavin<br>metabolic<br>process                       | biological<br>_process | GO:0006771 | 3 | 18 | 1.916249 | 0.01447 | 0.319296 | LOC114294164 LOC114314310 LOC114318308 |  |                                                                                                                       |
|                                                          |                        |            |   |    |          |         |          |                                        |  | <a href="http://amigo.geneontology.org/amigo/term/GO:0009231">http://amigo.geneontology.org/amigo/term/GO:0009231</a> |
| riboflavin<br>biosynthetic<br>process                    | biological<br>_process | GO:0009231 | 3 | 18 | 1.916249 | 0.01447 | 0.319296 | LOC114294164 LOC114314310 LOC114318308 |  |                                                                                                                       |
|                                                          |                        |            |   |    |          |         |          |                                        |  | <a href="http://amigo.geneontology.org/amigo/term/GO:0034504">http://amigo.geneontology.org/amigo/term/GO:0034504</a> |
| protein<br>localization to<br>nucleus                    | biological<br>_process | GO:0034504 | 3 | 18 | 1.916249 | 0.01447 | 0.319296 | LOC114258151 LOC114266339 LOC114315996 |  |                                                                                                                       |
|                                                          |                        |            |   |    |          |         |          |                                        |  | <a href="http://amigo.geneontology.org/amigo/term/GO:0042726">http://amigo.geneontology.org/amigo/term/GO:0042726</a> |
| flavin-containing<br>compound<br>metabolic<br>process    | biological<br>_process | GO:0042726 | 3 | 18 | 1.916249 | 0.01447 | 0.319296 | LOC114294164 LOC114314310 LOC114318308 |  |                                                                                                                       |
|                                                          |                        |            |   |    |          |         |          |                                        |  | <a href="http://amigo.geneontology.org/amigo/term/GO:0042727">http://amigo.geneontology.org/amigo/term/GO:0042727</a> |
| flavin-containing<br>compound<br>biosynthetic<br>process | biological<br>_process | GO:0042727 | 3 | 18 | 1.916249 | 0.01447 | 0.319296 | LOC114294164 LOC114314310 LOC114318308 |  |                                                                                                                       |

|                                             |                        |            |   |    |          |         |          |                                        |                                                                                                                                           |
|---------------------------------------------|------------------------|------------|---|----|----------|---------|----------|----------------------------------------|-------------------------------------------------------------------------------------------------------------------------------------------|
| protein targeting<br>to nucleus             | biological<br>_process | GO:0044744 | 3 | 18 | 1.916249 | 0.01447 | 0.319296 | LOC114258151 LOC114266339 LOC114315996 | m/GO:00427<br>27<br><a href="http://amigo.geneontology.org/amigo/term/GO:0044744">http://amigo.geneontology.org/amigo/term/GO:0044744</a> |
| nuclear import                              | biological<br>_process | GO:0051170 | 3 | 19 | 1.815394 | 0.01681 | 0.341901 | LOC114258151 LOC114266339 LOC114315996 | <a href="http://amigo.geneontology.org/amigo/term/GO:0051170">http://amigo.geneontology.org/amigo/term/GO:0051170</a>                     |
| single-organism<br>nuclear import           | biological<br>_process | GO:1902593 | 3 | 19 | 1.815394 | 0.01681 | 0.341901 | LOC114258151 LOC114266339 LOC114315996 | <a href="http://amigo.geneontology.org/amigo/term/GO:1902593">http://amigo.geneontology.org/amigo/term/GO:1902593</a>                     |
| nucleotide-sugar<br>biosynthetic<br>process | biological<br>_process | GO:0009226 | 3 | 21 | 1.642499 | 0.02211 | 0.407207 | LOC114288413 LOC114294805 LOC114299955 | <a href="http://amigo.geneontology.org/amigo/term/GO:0009226">http://amigo.geneontology.org/amigo/term/GO:0009226</a>                     |
| spindle assembly                            | biological<br>_process | GO:0051225 | 3 | 21 | 1.642499 | 0.02211 | 0.407207 | LOC114266363 LOC114273300 LOC114295560 | <a href="http://amigo.geneontology.org/amigo/term/GO:0051225">http://amigo.geneontology.org/amigo/term/GO:0051225</a>                     |

|                                               |                     |            |   |    |          |         |          |                                        |                                                                                                                       |
|-----------------------------------------------|---------------------|------------|---|----|----------|---------|----------|----------------------------------------|-----------------------------------------------------------------------------------------------------------------------|
|                                               |                     |            |   |    |          |         |          |                                        | m/GO:0051225                                                                                                          |
|                                               |                     |            |   |    |          |         |          |                                        | 25                                                                                                                    |
| positive                                      |                     |            |   |    |          |         |          |                                        | <a href="http://amigo.geneontology.org/amigo/term/GO:0010638">http://amigo.geneontology.org/amigo/term/GO:0010638</a> |
| regulation of organelle organization          | biological _process | GO:0010638 | 3 | 22 | 1.56784  | 0.02506 | 0.442436 | LOC114275505 LOC114306769 LOC114317545 |                                                                                                                       |
|                                               |                     |            |   |    |          |         |          |                                        | <a href="http://amigo.geneontology.org/amigo/term/GO:0031124">http://amigo.geneontology.org/amigo/term/GO:0031124</a> |
| mRNA 3'-end processing                        | biological _process | GO:0031124 | 3 | 22 | 1.56784  | 0.02506 | 0.442436 | LOC114288404 LOC114307624 LOC114314245 |                                                                                                                       |
|                                               |                     |            |   |    |          |         |          |                                        | 24                                                                                                                    |
| positive                                      |                     |            |   |    |          |         |          |                                        | <a href="http://amigo.geneontology.org/amigo/term/GO:0051130">http://amigo.geneontology.org/amigo/term/GO:0051130</a> |
| regulation of cellular component organization | biological _process | GO:0051130 | 3 | 22 | 1.56784  | 0.02506 | 0.442436 | LOC114275505 LOC114306769 LOC114317545 |                                                                                                                       |
|                                               |                     |            |   |    |          |         |          |                                        | 30                                                                                                                    |
|                                               |                     |            |   |    |          |         |          |                                        | <a href="http://amigo.geneontology.org/amigo/term/GO:0018342">http://amigo.geneontology.org/amigo/term/GO:0018342</a> |
| protein prenylation                           | biological _process | GO:0018342 | 3 | 24 | 1.437187 | 0.03156 | 0.467064 | LOC114273952 LOC114280309 LOC114284046 |                                                                                                                       |
|                                               |                     |            |   |    |          |         |          |                                        | 42                                                                                                                    |
|                                               |                     |            |   |    |          |         |          |                                        | <a href="http://amigo.geneontology.org/amigo/term/GO:0097354">http://amigo.geneontology.org/amigo/term/GO:0097354</a> |
| prenylation                                   | biological _process | GO:0097354 | 3 | 24 | 1.437187 | 0.03156 | 0.467064 | LOC114273952 LOC114280309 LOC114284046 |                                                                                                                       |



|                                           |                    |            |   |    |          |         |          |                                        |                                                                                                                                       |
|-------------------------------------------|--------------------|------------|---|----|----------|---------|----------|----------------------------------------|---------------------------------------------------------------------------------------------------------------------------------------|
| monocarboxylic acid catabolic process     | biological_process | GO:0072329 | 3 | 25 | 1.379699 | 0.03511 | 0.503818 | LOC114272337 LOC114298958 LOC114321080 | m/GO:0097354<br><a href="http://amigo.geneontology.org/amigo/term/GO:0072329">http://amigo.geneontology.org/amigo/term/GO:0072329</a> |
| IMP biosynthetic process                  | biological_process | GO:0006188 | 3 | 26 | 1.326634 | 0.03886 | 0.531541 | LOC114269944 LOC114270740 LOC114279846 | <a href="http://amigo.geneontology.org/amigo/term/GO:0006188">http://amigo.geneontology.org/amigo/term/GO:0006188</a>                 |
| IMP metabolic process                     | biological_process | GO:0046040 | 3 | 26 | 1.326634 | 0.03886 | 0.531541 | LOC114269944 LOC114270740 LOC114279846 | <a href="http://amigo.geneontology.org/amigo/term/GO:0046040">http://amigo.geneontology.org/amigo/term/GO:0046040</a>                 |
| nucleotide-sugar metabolic process        | biological_process | GO:0009225 | 3 | 27 | 1.277499 | 0.0428  | 0.563581 | LOC114288413 LOC114294805 LOC114299955 | <a href="http://amigo.geneontology.org/amigo/term/GO:0009225">http://amigo.geneontology.org/amigo/term/GO:0009225</a>                 |
| regulation of gene expression, epigenetic | biological_process | GO:0040029 | 3 | 27 | 1.277499 | 0.0428  | 0.563581 | LOC114307025 LOC114313578 LOC114317894 | <a href="http://amigo.geneontology.org/amigo/term/GO:0040029">http://amigo.geneontology.org/amigo/term/GO:0040029</a>                 |

|                                     |                        |            |   |    |          |         |          |                                        |                                                                                                                       |
|-------------------------------------|------------------------|------------|---|----|----------|---------|----------|----------------------------------------|-----------------------------------------------------------------------------------------------------------------------|
|                                     |                        |            |   |    |          |         |          |                                        | m/GO:0040029                                                                                                          |
|                                     |                        |            |   |    |          |         |          |                                        | <a href="http://amigo.geneontology.org/amigo/term/GO:0098656">http://amigo.geneontology.org/amigo/term/GO:0098656</a> |
| anion<br>transmembrane<br>transport | biological<br>_process | GO:0098656 | 3 | 28 | 1.231874 | 0.04694 | 0.589727 | LOC114274059 LOC114277736 LOC114295821 |                                                                                                                       |
|                                     |                        |            |   |    |          |         |          |                                        | <a href="http://amigo.geneontology.org/amigo/term/GO:1903457">http://amigo.geneontology.org/amigo/term/GO:1903457</a> |
| lactate catabolic<br>process        | biological<br>_process | GO:1903457 | 2 | 2  | 11.49749 | 0.00085 | 0.089492 | LOC114272337 LOC114298958              |                                                                                                                       |
|                                     |                        |            |   |    |          |         |          |                                        | <a href="http://amigo.geneontology.org/amigo/term/GO:0033619">http://amigo.geneontology.org/amigo/term/GO:0033619</a> |
| membrane<br>protein<br>proteolysis  | biological<br>_process | GO:0033619 | 2 | 3  | 7.664995 | 0.00249 | 0.155728 | LOC114281818 LOC114295456              |                                                                                                                       |
|                                     |                        |            |   |    |          |         |          |                                        | <a href="http://amigo.geneontology.org/amigo/term/GO:0006089">http://amigo.geneontology.org/amigo/term/GO:0006089</a> |
| lactate metabolic<br>process        | biological<br>_process | GO:0006089 | 2 | 4  | 5.748747 | 0.00489 | 0.215806 | LOC114272337 LOC114298958              |                                                                                                                       |
|                                     |                        |            |   |    |          |         |          |                                        | <a href="http://amigo.geneontology.org/amigo/term/GO:0006282">http://amigo.geneontology.org/amigo/term/GO:0006282</a> |
| regulation of<br>DNA repair         | biological<br>_process | GO:0006282 | 2 | 5  | 4.598997 | 0.00799 | 0.301429 | LOC114302295 LOC114310205              |                                                                                                                       |



|                                                             |                        |            |   |   |          |         |          |                           |                                                     |
|-------------------------------------------------------------|------------------------|------------|---|---|----------|---------|----------|---------------------------|-----------------------------------------------------|
|                                                             |                        |            |   |   |          |         |          |                           | m/GO:0006390                                        |
|                                                             |                        |            |   |   |          |         |          |                           | http://amigo.geneontology.org/amigo/term/GO:0015976 |
| carbon utilization                                          | biological<br>_process | GO:0015976 | 2 | 7 | 3.284998 | 0.01613 | 0.339893 | LOC114297011 LOC114310655 | http://amigo.geneontology.org/amigo/term/GO:0080135 |
| regulation of<br>cellular response<br>to stress             | biological<br>_process | GO:0080135 | 2 | 7 | 3.284998 | 0.01613 | 0.339893 | LOC114302295 LOC114310205 | http://amigo.geneontology.org/amigo/term/GO:0006777 |
| Mo-<br>molybdopterin<br>cofactor<br>biosynthetic<br>process | biological<br>_process | GO:0006777 | 2 | 8 | 2.874373 | 0.0211  | 0.394823 | LOC114262969 LOC114297157 | http://amigo.geneontology.org/amigo/term/GO:0015693 |
| magnesium ion<br>transport                                  | biological<br>_process | GO:0015693 | 2 | 8 | 2.874373 | 0.0211  | 0.394823 | LOC114265556 LOC114274664 | http://amigo.geneontology.org/amigo/term/GO:0019720 |
| Mo-<br>molybdopterin<br>cofactor                            | biological<br>_process | GO:0019720 | 2 | 8 | 2.874373 | 0.0211  | 0.394823 | LOC114262969 LOC114297157 | http://amigo.geneontology.org/amigo/term/GO:0006390 |

|                                             |                     |            |   |    |          |         |          |                           |                                                                                                                       |
|---------------------------------------------|---------------------|------------|---|----|----------|---------|----------|---------------------------|-----------------------------------------------------------------------------------------------------------------------|
| metabolic process                           |                     |            |   |    |          |         |          |                           | m/GO:0019720                                                                                                          |
| molybdopterin cofactor biosynthetic process | biological _process | GO:0032324 | 2 | 8  | 2.874373 | 0.0211  | 0.394823 | LOC114262969 LOC114297157 | <a href="http://amigo.geneontology.org/amigo/term/GO:0032324">http://amigo.geneontology.org/amigo/term/GO:0032324</a> |
| molybdopterin cofactor metabolic process    | biological _process | GO:0043545 | 2 | 8  | 2.874373 | 0.0211  | 0.394823 | LOC114262969 LOC114297157 | <a href="http://amigo.geneontology.org/amigo/term/GO:0043545">http://amigo.geneontology.org/amigo/term/GO:0043545</a> |
| prosthetic group metabolic process          | biological _process | GO:0051189 | 2 | 8  | 2.874373 | 0.0211  | 0.394823 | LOC114262969 LOC114297157 | <a href="http://amigo.geneontology.org/amigo/term/GO:0051189">http://amigo.geneontology.org/amigo/term/GO:0051189</a> |
| microtubule severing                        | biological _process | GO:0051013 | 2 | 10 | 2.299499 | 0.03263 | 0.471987 | LOC114268986 LOC114296265 | <a href="http://amigo.geneontology.org/amigo/term/GO:0051013">http://amigo.geneontology.org/amigo/term/GO:0051013</a> |
| microtubule nucleation                      | biological _process | GO:0007020 | 2 | 12 | 1.916249 | 0.04607 | 0.582474 | LOC114260629 LOC114315282 | <a href="http://amigo.geneontology.org/amigo/term/GO:0007020">http://amigo.geneontology.org/amigo/term/GO:0007020</a> |



LOC114278552|LOC114279052|LOC114279387|LOC114280503|LOC114280621|LOC114280  
827|LOC114282192|LOC114282429|LOC114283072|LOC114283073|LOC114283133|LOC11  
4283502|LOC114283512|LOC114283693|LOC114284490|LOC114284927|LOC114285178|LO  
C114285600|LOC114285746|LOC114285762|LOC114285852|LOC114286217|LOC11428637  
7|LOC114286516|LOC114286550|LOC114286557|LOC114286573|LOC114286827|LOC1142  
86999|LOC114287055|LOC114287661|LOC114287737|LOC114288195|LOC114288404|LOC  
114288960|LOC114289281|LOC114289500|LOC114289696|LOC114289890|LOC114289925|  
LOC114289998|LOC114290087|LOC114290169|LOC114290532|LOC114290602|LOC114290  
633|LOC114290835|LOC114291111|LOC114291143|LOC114291656|LOC114291770|LOC11  
4292193|LOC114292214|LOC114292579|LOC114293016|LOC114293322|LOC114293376|LO  
C114293530|LOC114294164|LOC114294418|LOC114294519|LOC114295560|LOC11429592  
7|LOC114296788|LOC114297542|LOC114298303|LOC114298503|LOC114298693|LOC1142  
98958|LOC114299009|LOC114299128|LOC114299207|LOC114299246|LOC114299251|LOC  
114299440|LOC114299630|LOC114299719|LOC114300148|LOC114300977|LOC114301033|  
LOC114301147|LOC114301163|LOC114301272|LOC114302147|LOC114303552|LOC114303  
971|LOC114304031|LOC114305008|LOC114305009|LOC114305423|LOC114305919|LOC11  
4306070|LOC114306375|LOC114306476|LOC114306531|LOC114306769|LOC114306824|LO  
C114307025|LOC114307624|LOC114307688|LOC114308149|LOC114308709|LOC11430946  
9|LOC114309962|LOC114310023|LOC114310148|LOC114310205|LOC114310357|LOC1143  
10377|LOC114310493|LOC114310656|LOC114311450|LOC114311675|LOC114311681|LOC  
114311741|LOC114311810|LOC114312578|LOC114312774|LOC114312858|LOC114313006|  
LOC114313166|LOC114313408|LOC114313578|LOC114314245|LOC114315174|LOC114315  
427|LOC114315665|LOC114315782|LOC114315853|LOC114315989|LOC114316352|LOC11  
4316460|LOC114316831|LOC114316905|LOC114317014|LOC114317106|LOC114317268|LO  
C114317290|LOC114317563|LOC114317632|LOC114317815|LOC114317894|LOC11431883  
2|LOC114319208|LOC114319358|LOC114319874|LOC114320239|LOC114320625|LOC1143

|           |                        |            |     |      |          |         |          |                                                                                                                                                                                                                                                                                                                                                                                                                                                                                                                                                                                                                                                                                                                                                                                                                                                                                                                                                                                                                                                                                                                                                                                                                                                                                                                                                                                                                                                                                                                                                                                                                                                                                                                                                                              |                                                                     |
|-----------|------------------------|------------|-----|------|----------|---------|----------|------------------------------------------------------------------------------------------------------------------------------------------------------------------------------------------------------------------------------------------------------------------------------------------------------------------------------------------------------------------------------------------------------------------------------------------------------------------------------------------------------------------------------------------------------------------------------------------------------------------------------------------------------------------------------------------------------------------------------------------------------------------------------------------------------------------------------------------------------------------------------------------------------------------------------------------------------------------------------------------------------------------------------------------------------------------------------------------------------------------------------------------------------------------------------------------------------------------------------------------------------------------------------------------------------------------------------------------------------------------------------------------------------------------------------------------------------------------------------------------------------------------------------------------------------------------------------------------------------------------------------------------------------------------------------------------------------------------------------------------------------------------------------|---------------------------------------------------------------------|
| organelle | cellular_c<br>omponent | GO:0043226 | 242 | 6526 | 0.509527 | 0.00011 | 0.001932 | 20721 LOC114321109 LOC114321899 LOC114322096 LOC114322869 LOC114322928 LOC114323035 LOC114323303 LOC114323389 LOC114323396 LOC114323552 LOC114323752 LOC114323885 LOC114324108                                                                                                                                                                                                                                                                                                                                                                                                                                                                                                                                                                                                                                                                                                                                                                                                                                                                                                                                                                                                                                                                                                                                                                                                                                                                                                                                                                                                                                                                                                                                                                                               | http://amigo.g<br>eneontology.o<br>rg/amigo/ter<br>m/GO:00432<br>26 |
|           |                        |            |     |      |          |         |          | LOC114255792 LOC114255793 LOC114255879 LOC114256225 LOC114256656 LOC114256667 LOC114257012 LOC114257018 LOC114257423 LOC114258400 LOC114258475 LOC114258507 LOC114258817 LOC114259356 LOC114259437 LOC114259896 LOC114260587 LOC114260589 LOC114260668 LOC114260756 LOC114261687 LOC114261735 LOC114261853 LOC114261858 LOC114262465 LOC114262677 LOC114262741 LOC114262815 LOC114262908 LOC114263000 LOC114263018 LOC114263338 LOC114263355 LOC114263511 LOC114263765 LOC114264047 LOC114264127 LOC114264638 LOC114264677 LOC114264704 LOC114265238 LOC114265367 LOC114265370 LOC114265376 LOC114265517 LOC114265662 LOC114265756 LOC114266363 LOC114266618 LOC114267428 LOC114267438 LOC114267817 LOC114267889 LOC114267997 LOC114268309 LOC114268452 LOC114268546 LOC114269021 LOC114269044 LOC114269466 LOC114270285 LOC114270289 LOC114270799 LOC114272240 LOC114272337 LOC114272475 LOC114273170 LOC114273300 LOC114273602 LOC114274210 LOC114274441 LOC114274847 LOC114274923 LOC114275496 LOC114276687 LOC114277058 LOC114277383 LOC114277629 LOC114277815 LOC114278212 LOC114278552 LOC114279052 LOC114279387 LOC114280503 LOC114280621 LOC114280827 LOC114282192 LOC114282429 LOC114283072 LOC114283073 LOC114283133 LOC114283502 LOC114283512 LOC114283693 LOC114284490 LOC114284927 LOC114285178 LOC114285600 LOC114285746 LOC114285762 LOC114285852 LOC114286217 LOC114286377 LOC114286516 LOC114286550 LOC114286557 LOC114286573 LOC114286827 LOC114286999 LOC114287055 LOC114287661 LOC114287737 LOC114288195 LOC114288404 LOC114288960 LOC114289281 LOC114289500 LOC114289696 LOC114289890 LOC114289925 LOC114289998 LOC114290087 LOC114290169 LOC114290532 LOC114290602 LOC114290633 LOC114290835 LOC114291111 LOC114291143 LOC114291656 LOC114291770 LOC11 |                                                                     |



|         |                    |            |     |      |          |         |          |                                                                                                                                                                                                                                                                                                                                                                                                                                                                                                                                                                                                                                                                                                                                                                                                                                                                                                                                                                                                                                                                                                                                                                                                                                                                                                                                                                                                                                                                                                                                                                                                                                                                                                                                                                                                                                                                                                                                                                    |
|---------|--------------------|------------|-----|------|----------|---------|----------|--------------------------------------------------------------------------------------------------------------------------------------------------------------------------------------------------------------------------------------------------------------------------------------------------------------------------------------------------------------------------------------------------------------------------------------------------------------------------------------------------------------------------------------------------------------------------------------------------------------------------------------------------------------------------------------------------------------------------------------------------------------------------------------------------------------------------------------------------------------------------------------------------------------------------------------------------------------------------------------------------------------------------------------------------------------------------------------------------------------------------------------------------------------------------------------------------------------------------------------------------------------------------------------------------------------------------------------------------------------------------------------------------------------------------------------------------------------------------------------------------------------------------------------------------------------------------------------------------------------------------------------------------------------------------------------------------------------------------------------------------------------------------------------------------------------------------------------------------------------------------------------------------------------------------------------------------------------------|
| nucleus | cellular_component | GO:0005634 | 158 | 4263 | 0.509261 | 0.00329 | 0.042022 | <p>4292193 LOC114292214 LOC114292579 LOC114293016 LOC114293322 LOC114293376 LOC114293530 LOC114294164 LOC114294418 LOC114294519 LOC114295560 LOC114295927 LOC114296788 LOC114297542 LOC114298303 LOC114298503 LOC114298693 LOC114298958 LOC114299009 LOC114299128 LOC114299207 LOC114299246 LOC114299251 LOC114299440 LOC114299630 LOC114299719 LOC114300148 LOC114300977 LOC114301033 LOC114301147 LOC114301163 LOC114301272 LOC114302147 LOC114303552 LOC114303971 LOC114304031 LOC114305008 LOC114305009 LOC114305423 LOC114305919 LOC114306070 LOC114306375 LOC114306476 LOC114306531 LOC114306769 LOC114306824 LOC114307025 LOC114307624 LOC114307688 LOC114308149 LOC114308709 LOC114309469 LOC114309962 LOC114310023 LOC114310148 LOC114310205 LOC114310357 LOC114310377 LOC114310493 LOC114310656 LOC114311450 LOC114311675 LOC114311681 LOC114311741 LOC114311810 LOC114312578 LOC114312774 LOC114312858 LOC114313006 LOC114313166 LOC114313408 LOC114313578 LOC114314245 LOC114315174 LOC114315427 LOC114315665 LOC114315782 LOC114315853 LOC114315989 LOC114316352 LOC114316460 LOC114316831 LOC114316905 LOC114317014 LOC114317106 LOC114317268 LOC114317290 LOC114317563 LOC114317632 LOC114317815 LOC114317894 LOC114318832 LOC114319208 LOC114319358 LOC114319874 LOC114320239 LOC114320625 LOC114320721 LOC114321109 LOC114321899 LOC114322096 LOC114322869 LOC114322928 LOC114323035 LOC114323303 LOC114323389 LOC114323396 LOC114323552 LOC114323752 LOC114323885 LOC114324108 LOC114255792 LOC114256225 LOC114256656 LOC114256667 LOC114257012 LOC114257423 LOC114258507 LOC114259356 LOC114259437 LOC114259896 LOC114260668 LOC114260756 LOC114261735 LOC114261858 LOC114262465 LOC114262815 LOC114262908 LOC114263000 LOC114263338 LOC114263355 LOC114263511 LOC114263765 LOC114264638 LOC114265367 LOC114265370 LOC114265376 LOC114265662 LOC114265756 LOC114267428 LOC114267438 LOC114267817 LOC114267889 LOC114267997 LOC114268309 LOC</p> |
|---------|--------------------|------------|-----|------|----------|---------|----------|--------------------------------------------------------------------------------------------------------------------------------------------------------------------------------------------------------------------------------------------------------------------------------------------------------------------------------------------------------------------------------------------------------------------------------------------------------------------------------------------------------------------------------------------------------------------------------------------------------------------------------------------------------------------------------------------------------------------------------------------------------------------------------------------------------------------------------------------------------------------------------------------------------------------------------------------------------------------------------------------------------------------------------------------------------------------------------------------------------------------------------------------------------------------------------------------------------------------------------------------------------------------------------------------------------------------------------------------------------------------------------------------------------------------------------------------------------------------------------------------------------------------------------------------------------------------------------------------------------------------------------------------------------------------------------------------------------------------------------------------------------------------------------------------------------------------------------------------------------------------------------------------------------------------------------------------------------------------|

<http://amigo.geneontology.org/amigo/term/GO:0005634>

|                  |                    |            |    |      |          |         |          |                                                                                                                                                                                                                                                                                                                                                                                                                                                                                                                                                                                                                                                                                                                                                                                                                                                                                                                                                                                                                                                                                                                                                                                                                                                                                                                                                                                                                                                                                                                                                                                                                                                                                                                                                                                                                                                                                                                                                                                                                                                                                       |
|------------------|--------------------|------------|----|------|----------|---------|----------|---------------------------------------------------------------------------------------------------------------------------------------------------------------------------------------------------------------------------------------------------------------------------------------------------------------------------------------------------------------------------------------------------------------------------------------------------------------------------------------------------------------------------------------------------------------------------------------------------------------------------------------------------------------------------------------------------------------------------------------------------------------------------------------------------------------------------------------------------------------------------------------------------------------------------------------------------------------------------------------------------------------------------------------------------------------------------------------------------------------------------------------------------------------------------------------------------------------------------------------------------------------------------------------------------------------------------------------------------------------------------------------------------------------------------------------------------------------------------------------------------------------------------------------------------------------------------------------------------------------------------------------------------------------------------------------------------------------------------------------------------------------------------------------------------------------------------------------------------------------------------------------------------------------------------------------------------------------------------------------------------------------------------------------------------------------------------------------|
| cytoplasmic part | cellular_component | GO:0044444 | 92 | 2301 | 0.549377 | 0.00385 | 0.048082 | 114268452 LOC114269021 LOC114269044 LOC114269466 LOC114270289 LOC114273602 <br>LOC114274210 LOC114274441 LOC114274923 LOC114275496 LOC114277058 LOC114277<br>815 LOC114278212 LOC114279387 LOC114280827 LOC114282192 LOC114283072 LOC11<br>4283073 LOC114283133 LOC114283502 LOC114283693 LOC114284927 LOC114285178 LO<br>C114285600 LOC114285762 LOC114286377 LOC114286516 LOC114286550 LOC11428699<br>9 LOC114287055 LOC114287661 LOC114287737 LOC114288404 LOC114288960 LOC1142<br>89281 LOC114289500 LOC114289696 LOC114289890 LOC114289925 LOC114289998 LOC<br>114290169 LOC114290532 LOC114290602 LOC114290633 LOC114291770 LOC114292193 <br>LOC114292579 LOC114293016 LOC114293322 LOC114293530 LOC114294418 LOC114295<br>927 LOC114296788 LOC114297542 LOC114298303 LOC114298503 LOC114299128 LOC11<br>4299207 LOC114299630 LOC114299719 LOC114300148 LOC114301147 LOC114301163 LO<br>C114303552 LOC114303971 LOC114304031 LOC114305008 LOC114305009 LOC11430542<br>3 LOC114305919 LOC114306070 LOC114306375 LOC114306476 LOC114306824 LOC1143<br>07025 LOC114307624 LOC114307688 LOC114308149 LOC114309469 LOC114309962 LOC<br>114310023 LOC114310148 LOC114310205 LOC114310357 LOC114310493 LOC114310656 <br>LOC114311450 LOC114311675 LOC114311681 LOC114312774 LOC114312858 LOC114313<br>006 LOC114313166 LOC114313408 LOC114313578 LOC114314245 LOC114315427 LOC11<br>4315665 LOC114315782 LOC114315989 LOC114316352 LOC114316460 LOC114316831 LO<br>C114316905 LOC114317014 LOC114317268 LOC114317290 LOC114317815 LOC11431789<br>4 LOC114318832 LOC114319208 LOC114319358 LOC114319874 LOC114320721 LOC1143<br>21109 LOC114321899 LOC114322096 LOC114322869 LOC114323035 LOC114323303 LOC<br>114323389 LOC114323552 LOC114323752 LOC114324108<br>LOC114255793 LOC114255879 LOC114257018 LOC114258284 LOC114258294 LOC114258<br>400 LOC114258817 LOC114260587 LOC114260589 LOC114261687 LOC114261853 LOC11<br>4262677 LOC114262741 LOC114262899 LOC114263018 LOC114264047 LOC114264127 LO<br>C114265517 LOC114265975 LOC114266618 LOC114268546 LOC114270152 LOC11427028 |
|                  |                    |            |    |      |          |         |          | <a href="http://amigo.geneontology.org/amigo/term">http://amigo.geneontology.org/amigo/term</a>                                                                                                                                                                                                                                                                                                                                                                                                                                                                                                                                                                                                                                                                                                                                                                                                                                                                                                                                                                                                                                                                                                                                                                                                                                                                                                                                                                                                                                                                                                                                                                                                                                                                                                                                                                                                                                                                                                                                                                                       |

|                              |                    |            |    |      |          |         |          |                                                                                                                                                                                                                                                                                                                                                                                                                                                                                                                                                                                                                                                                                                                                                                                                                                                                                                                                                                                                                                                                                                                                                                                                                                                                                                                                                                                                                                                                                                                                                                                                                                                                                                                                                                                                                                                                                                                                          |              |
|------------------------------|--------------------|------------|----|------|----------|---------|----------|------------------------------------------------------------------------------------------------------------------------------------------------------------------------------------------------------------------------------------------------------------------------------------------------------------------------------------------------------------------------------------------------------------------------------------------------------------------------------------------------------------------------------------------------------------------------------------------------------------------------------------------------------------------------------------------------------------------------------------------------------------------------------------------------------------------------------------------------------------------------------------------------------------------------------------------------------------------------------------------------------------------------------------------------------------------------------------------------------------------------------------------------------------------------------------------------------------------------------------------------------------------------------------------------------------------------------------------------------------------------------------------------------------------------------------------------------------------------------------------------------------------------------------------------------------------------------------------------------------------------------------------------------------------------------------------------------------------------------------------------------------------------------------------------------------------------------------------------------------------------------------------------------------------------------------------|--------------|
|                              |                    |            |    |      |          |         |          | 5 LOC114270799 LOC114272337 LOC114272682 LOC114273170 LOC114274264 LOC114274847 LOC114276687 LOC114277383 LOC114278552 LOC114279052 LOC114280503 LOC114280621 LOC114282876 LOC114282880 LOC114283512 LOC114284046 LOC114284490 LOC114285744 LOC114285746 LOC114286217 LOC114286557 LOC114286573 LOC114286827 LOC114286867 LOC114288195 LOC114289785 LOC114290087 LOC114290835 LOC114291111 LOC114291656 LOC114292062 LOC114293321 LOC114293376 LOC114294075 LOC114294164 LOC114294519 LOC114297323 LOC114298693 LOC114298958 LOC114299246 LOC114299251 LOC114299440 LOC114300247 LOC114301272 LOC114301605 LOC114302147 LOC114303105 LOC114306531 LOC114307799 LOC114308004 LOC114308709 LOC114310136 LOC114310377 LOC114310941 LOC114311741 LOC114311810 LOC114312578 LOC114313963 LOC114315174 LOC114315853 LOC114317106 LOC114317563 LOC114320239 LOC114320625 LOC114320798 LOC114321491 LOC114322928 LOC114323396 LOC114323885 LOC114255793 LOC114256667 LOC114257012 LOC114258400 LOC114258475 LOC114260756 LOC114261735 LOC114261853 LOC114261858 LOC114262465 LOC114262815 LOC114263338 LOC114263355 LOC114264047 LOC114264677 LOC114264704 LOC114265238 LOC114265376 LOC114265662 LOC114265756 LOC114266363 LOC114266618 LOC114267438 LOC114267997 LOC114268309 LOC114269044 LOC114269466 LOC114270285 LOC114272240 LOC114272475 LOC114273300 LOC114274210 LOC114274847 LOC114277383 LOC114277629 LOC114278552 LOC114279052 LOC114280621 LOC114282192 LOC114283133 LOC114283693 LOC114284490 LOC114286217 LOC114286550 LOC114286557 LOC114286999 LOC114288195 LOC114288404 LOC114288960 LOC114289500 LOC114289890 LOC114290087 LOC114290602 LOC114290633 LOC114291111 LOC114291770 LOC114292579 LOC114294519 LOC114295560 LOC114299009 LOC114299251 LOC114299440 LOC114299719 LOC114301033 LOC114303552 LOC114304031 LOC114305008 LOC114305009 LOC114306375 LOC114306769 LOC114307624 LOC114308709 LOC114310023 LOC114310148 LOC | m/GO:0044444 |
| intracellular organelle part | cellular_component | GO:0044446 | 89 | 2178 | 0.561476 | 0.00244 | 0.032282 |                                                                                                                                                                                                                                                                                                                                                                                                                                                                                                                                                                                                                                                                                                                                                                                                                                                                                                                                                                                                                                                                                                                                                                                                                                                                                                                                                                                                                                                                                                                                                                                                                                                                                                                                                                                                                                                                                                                                          |              |

|                                       |                        |            |    |      |          |         |          |                                                                                                                                                                                                                                                                                                                                                                                                                                                                                                                                                                                                                                                                                                                                                                                                                                                                                                                                                                                                                                                                                                                                                                                                                                                                                                                                                                                                                                                                                                                                                                                                                                                                                                                                                                                                                                                                                                                                                                          |
|---------------------------------------|------------------------|------------|----|------|----------|---------|----------|--------------------------------------------------------------------------------------------------------------------------------------------------------------------------------------------------------------------------------------------------------------------------------------------------------------------------------------------------------------------------------------------------------------------------------------------------------------------------------------------------------------------------------------------------------------------------------------------------------------------------------------------------------------------------------------------------------------------------------------------------------------------------------------------------------------------------------------------------------------------------------------------------------------------------------------------------------------------------------------------------------------------------------------------------------------------------------------------------------------------------------------------------------------------------------------------------------------------------------------------------------------------------------------------------------------------------------------------------------------------------------------------------------------------------------------------------------------------------------------------------------------------------------------------------------------------------------------------------------------------------------------------------------------------------------------------------------------------------------------------------------------------------------------------------------------------------------------------------------------------------------------------------------------------------------------------------------------------------|
| organelle part                        | cellular_c<br>omponent | GO:0044422 | 89 | 2179 | 0.561218 | 0.00247 | 0.032282 | 114310357 LOC114310377 LOC114310656 LOC114311681 LOC114312578 LOC114312774 <br>LOC114312858 LOC114313006 LOC114316831 LOC114317106 LOC114317563 LOC114317<br>632 LOC114320625 LOC114323396 LOC114323752<br><br>LOC114255793 LOC114256667 LOC114257012 LOC114258400 LOC114258475 LOC114260<br>756 LOC114261735 LOC114261853 LOC114261858 LOC114262465 LOC114262815 LOC11<br>4263338 LOC114263355 LOC114264047 LOC114264677 LOC114264704 LOC114265238 LO<br>C114265376 LOC114265662 LOC114265756 LOC114266363 LOC114266618 LOC11426743<br>8 LOC114267997 LOC114268309 LOC114269044 LOC114269466 LOC114270285 LOC1142<br>72240 LOC114272475 LOC114273300 LOC114274210 LOC114274847 LOC114277383 LOC<br>114277629 LOC114278552 LOC114279052 LOC114280621 LOC114282192 LOC114283133 <br>LOC114283693 LOC114284490 LOC114286217 LOC114286550 LOC114286557 LOC114286<br>999 LOC114288195 LOC114288404 LOC114288960 LOC114289500 LOC114289890 LOC11<br>4290087 LOC114290602 LOC114290633 LOC114291111 LOC114291770 LOC114292579 LO<br>C114294519 LOC114295560 LOC114299009 LOC114299251 LOC114299440 LOC11429971<br>9 LOC114301033 LOC114303552 LOC114304031 LOC114305008 LOC114305009 LOC1143<br>06375 LOC114306769 LOC114307624 LOC114308709 LOC114310023 LOC114310148 LOC<br>114310357 LOC114310377 LOC114310656 LOC114311681 LOC114312578 LOC114312774 <br>LOC114312858 LOC114313006 LOC114316831 LOC114317106 LOC114317563 LOC114317<br>632 LOC114320625 LOC114323396 LOC114323752<br><br>LOC114256667 LOC114258400 LOC114258475 LOC114260756 LOC114263338 LOC114264<br>677 LOC114264704 LOC114265238 LOC114266363 LOC114268309 LOC114269044 LOC11<br>4272240 LOC114272475 LOC114273300 LOC114276687 LOC114277629 LOC114283133 LO<br>C114285746 LOC114285852 LOC114286550 LOC114286827 LOC114288960 LOC11428989<br>0 LOC114291111 LOC114291143 LOC114291656 LOC114292214 LOC114295560 LOC1142<br>98693 LOC114299009 LOC114300977 LOC114301033 LOC114305008 LOC114305009 LOC |
|                                       |                        |            |    |      |          |         |          | <a href="http://amigo.geneontology.org/amigo/term/GO:0044422">http://amigo.geneontology.org/amigo/term/GO:0044422</a>                                                                                                                                                                                                                                                                                                                                                                                                                                                                                                                                                                                                                                                                                                                                                                                                                                                                                                                                                                                                                                                                                                                                                                                                                                                                                                                                                                                                                                                                                                                                                                                                                                                                                                                                                                                                                                                    |
| non-membrane-<br>bounded<br>organelle | cellular_c<br>omponent | GO:0043228 | 44 | 1117 | 0.541251 | 0.0493  | 0.36281  | <a href="http://amigo.geneontology.org/amigo/term/GO:0043228">http://amigo.geneontology.org/amigo/term/GO:0043228</a>                                                                                                                                                                                                                                                                                                                                                                                                                                                                                                                                                                                                                                                                                                                                                                                                                                                                                                                                                                                                                                                                                                                                                                                                                                                                                                                                                                                                                                                                                                                                                                                                                                                                                                                                                                                                                                                    |

|                                              |                    |            |    |      |          |         |          |                                                                                                                                                                                                                                                                                                                                                                                                                                                                                                                                                                                             |                                                                                                                       |
|----------------------------------------------|--------------------|------------|----|------|----------|---------|----------|---------------------------------------------------------------------------------------------------------------------------------------------------------------------------------------------------------------------------------------------------------------------------------------------------------------------------------------------------------------------------------------------------------------------------------------------------------------------------------------------------------------------------------------------------------------------------------------------|-----------------------------------------------------------------------------------------------------------------------|
| intracellular non-membrane-bounded organelle | cellular_component | GO:0043232 | 44 | 1117 | 0.541251 | 0.0493  | 0.36281  | 114306375 LOC114306769 LOC114310357 LOC114311681 LOC114311741 LOC114311810 LOC114313006 LOC114315174 LOC114316831 LOC114317632                                                                                                                                                                                                                                                                                                                                                                                                                                                              | <a href="http://amigo.geneontology.org/amigo/term/GO:0043232">http://amigo.geneontology.org/amigo/term/GO:0043232</a> |
|                                              |                    |            |    |      |          |         |          | LOC114256667 LOC114258400 LOC114258475 LOC114260756 LOC114263338 LOC114264677 LOC114264704 LOC114265238 LOC114266363 LOC114268309 LOC114269044 LOC114272240 LOC114272475 LOC114273300 LOC114276687 LOC114277629 LOC114283133 LOC114285746 LOC114285852 LOC114286550 LOC114286827 LOC114288960 LOC114289890 LOC114291111 LOC114291143 LOC114291656 LOC114292214 LOC114295560 LOC114298693 LOC114299009 LOC114300977 LOC114301033 LOC114305008 LOC114305009 LOC114306375 LOC114306769 LOC114310357 LOC114311681 LOC114311741 LOC114311810 LOC114313006 LOC114315174 LOC114316831 LOC114317632 |                                                                                                                       |
| mitochondrion                                | cellular_component | GO:0005739 | 21 | 395  | 0.730502 | 0.01011 | 0.12089  | LOC114257018 LOC114260587 LOC114260589 LOC114261687 LOC114266618 LOC114270799 LOC114272337 LOC114274847 LOC114277383 LOC114284490 LOC114286217 LOC114286557 LOC114288195 LOC114290835 LOC114293376 LOC114298958 LOC114302147 LOC114317106 LOC114320239 LOC114322928 LOC114323396                                                                                                                                                                                                                                                                                                            | <a href="http://amigo.geneontology.org/amigo/term/GO:0005739">http://amigo.geneontology.org/amigo/term/GO:0005739</a> |
|                                              |                    |            |    |      |          |         |          | LOC114258284 LOC114258294 LOC114262899 LOC114265975 LOC114274264 LOC114282876 LOC114282880 LOC114286867 LOC114289785 LOC114292062 LOC114293321 LOC114297323 LOC114301605 LOC114303105 LOC114307799 LOC114308004 LOC114310136 LOC114310941 LOC114313963 LOC114320798                                                                                                                                                                                                                                                                                                                         |                                                                                                                       |
| cytosol                                      | cellular_component | GO:0005829 | 20 | 312  | 0.880794 | 0.00152 | 0.020835 | LOC114257012 LOC114262815 LOC114263355 LOC114265756 LOC114282192 LOC114286999 LOC114288404 LOC114289500 LOC114290633 LOC114291770 LOC114304031 LOC114307624 LOC114310023 LOC114310148 LOC114310656 LOC114312858 LOC114323752                                                                                                                                                                                                                                                                                                                                                                | <a href="http://amigo.geneontology.org/amigo/term/GO:0005829">http://amigo.geneontology.org/amigo/term/GO:0005829</a> |
|                                              |                    |            |    |      |          |         |          |                                                                                                                                                                                                                                                                                                                                                                                                                                                                                                                                                                                             |                                                                                                                       |
| nucleoplasm                                  | cellular_component | GO:0005654 | 17 | 196  | 1.191769 | 0.00011 | 0.001932 |                                                                                                                                                                                                                                                                                                                                                                                                                                                                                                                                                                                             | <a href="http://amigo.geneontology.org/amigo/term/GO:0005654">http://amigo.geneontology.org/amigo/term/GO:0005654</a> |
|                                              |                    |            |    |      |          |         |          |                                                                                                                                                                                                                                                                                                                                                                                                                                                                                                                                                                                             |                                                                                                                       |

|                                                      |                        |            |    |     |          |         |          |                                                                                                                                                                          |                                                                                                                       |
|------------------------------------------------------|------------------------|------------|----|-----|----------|---------|----------|--------------------------------------------------------------------------------------------------------------------------------------------------------------------------|-----------------------------------------------------------------------------------------------------------------------|
| cytoskeleton                                         | cellular_c<br>omponent | GO:0005856 | 13 | 232 | 0.769936 | 0.02614 | 0.244845 | LOC114258475 LOC114264677 LOC114264704 LOC114265238 LOC114266363 LOC114272240 LOC114272475 LOC114273300 LOC114277629 LOC114291143 LOC114295560 LOC114306769 LOC114317632 | <a href="http://amigo.geneontology.org/amigo/term/GO:0005856">http://amigo.geneontology.org/amigo/term/GO:0005856</a> |
| cytoskeletal part                                    | cellular_c<br>omponent | GO:0044430 | 12 | 187 | 0.881736 | 0.01238 | 0.141991 | LOC114258475 LOC114264677 LOC114264704 LOC114265238 LOC114266363 LOC114272240 LOC114272475 LOC114273300 LOC114277629 LOC114295560 LOC114306769 LOC114317632              | <a href="http://amigo.geneontology.org/amigo/term/GO:0044430">http://amigo.geneontology.org/amigo/term/GO:0044430</a> |
| transcription<br>factor complex                      | cellular_c<br>omponent | GO:0005667 | 10 | 78  | 1.761588 | 0.00013 | 0.002149 | LOC114262465 LOC114263355 LOC114267438 LOC114267997 LOC114291770 LOC114304031 LOC114310656 LOC114312774 LOC114312858 LOC114323752                                        | <a href="http://amigo.geneontology.org/amigo/term/GO:0005667">http://amigo.geneontology.org/amigo/term/GO:0005667</a> |
| nuclear<br>transcription<br>factor complex           | cellular_c<br>omponent | GO:0044798 | 10 | 78  | 1.761588 | 0.00013 | 0.002149 | LOC114262465 LOC114263355 LOC114267438 LOC114267997 LOC114291770 LOC114304031 LOC114310656 LOC114312774 LOC114312858 LOC114323752                                        | <a href="http://amigo.geneontology.org/amigo/term/GO:0044798">http://amigo.geneontology.org/amigo/term/GO:0044798</a> |
| RNA polymerase<br>II transcription<br>factor complex | cellular_c<br>omponent | GO:0090575 | 8  | 66  | 1.665502 | 0.00086 | 0.012083 | LOC114262465 LOC114263355 LOC114267997 LOC114291770 LOC114304031 LOC114310656 LOC114312858 LOC114323752                                                                  | <a href="http://amigo.geneontology.org/amigo/term/GO:0090575">http://amigo.geneontology.org/amigo/term/GO:0090575</a> |

|                                  |                    |            |   |    |          |         |          |                                                                               |                                                                                                                       |
|----------------------------------|--------------------|------------|---|----|----------|---------|----------|-------------------------------------------------------------------------------|-----------------------------------------------------------------------------------------------------------------------|
| nuclear chromatin                | cellular_component | GO:0000790 | 6 | 26 | 3.170859 | 0.00011 | 0.001932 | LOC114289890 LOC114305008 LOC114305009 LOC114311681 LOC114313006 LOC114316831 | <a href="http://amigo.geneontology.org/amigo/term/GO:0000790">http://amigo.geneontology.org/amigo/term/GO:0000790</a> |
| INO80-type complex               | cellular_component | GO:0097346 | 6 | 26 | 3.170859 | 0.00011 | 0.001932 | LOC114289890 LOC114305008 LOC114305009 LOC114311681 LOC114313006 LOC114316831 | <a href="http://amigo.geneontology.org/amigo/term/GO:0097346">http://amigo.geneontology.org/amigo/term/GO:0097346</a> |
| chromatin                        | cellular_component | GO:0000785 | 6 | 30 | 2.748078 | 0.00025 | 0.003903 | LOC114289890 LOC114305008 LOC114305009 LOC114311681 LOC114313006 LOC114316831 | <a href="http://amigo.geneontology.org/amigo/term/GO:0000785">http://amigo.geneontology.org/amigo/term/GO:0000785</a> |
| SWI/SNF superfamily-type complex | cellular_component | GO:0070603 | 6 | 33 | 2.498253 | 0.00043 | 0.006507 | LOC114289890 LOC114305008 LOC114305009 LOC114311681 LOC114313006 LOC114316831 | <a href="http://amigo.geneontology.org/amigo/term/GO:0070603">http://amigo.geneontology.org/amigo/term/GO:0070603</a> |
| DNA repair complex               | cellular_component | GO:1990391 | 6 | 37 | 2.228171 | 0.00081 | 0.011672 | LOC114266759 LOC114283296 LOC114296751 LOC114310357 LOC114312607 LOC114313379 | <a href="http://amigo.geneontology.org/amigo/term/GO:1990391">http://amigo.geneontology.org/amigo/term/GO:1990391</a> |

|                                          |                        |            |   |    |          |         |          |                                                                               |                                                                                                                       |
|------------------------------------------|------------------------|------------|---|----|----------|---------|----------|-------------------------------------------------------------------------------|-----------------------------------------------------------------------------------------------------------------------|
| myosin complex                           | cellular_c<br>omponent | GO:0016459 | 6 | 74 | 1.114086 | 0.02529 | 0.244845 | LOC114264677 LOC114264704 LOC114265238 LOC114272240 LOC114277629 LOC114317632 | <a href="http://amigo.geneontology.org/amigo/term/GO:0016459">http://amigo.geneontology.org/amigo/term/GO:0016459</a> |
| transcription<br>factor TFIID<br>complex | cellular_c<br>omponent | GO:0005669 | 5 | 18 | 3.816775 | 0.00016 | 0.002569 | LOC114291770 LOC114304031 LOC114310656 LOC114312858 LOC114323752              | <a href="http://amigo.geneontology.org/amigo/term/GO:0005669">http://amigo.geneontology.org/amigo/term/GO:0005669</a> |
| mismatch repair<br>complex               | cellular_c<br>omponent | GO:0032300 | 5 | 22 | 3.122816 | 0.00044 | 0.006507 | LOC114266759 LOC114283296 LOC114296751 LOC114312607 LOC114313379              | <a href="http://amigo.geneontology.org/amigo/term/GO:0032300">http://amigo.geneontology.org/amigo/term/GO:0032300</a> |
| vacuole                                  | cellular_c<br>omponent | GO:0005773 | 5 | 51 | 1.347097 | 0.01921 | 0.211687 | LOC114262741 LOC114283512 LOC114290087 LOC114306531 LOC114317563              | <a href="http://amigo.geneontology.org/amigo/term/GO:0005773">http://amigo.geneontology.org/amigo/term/GO:0005773</a> |
| endoplasmic<br>reticulum<br>membrane     | cellular_c<br>omponent | GO:0005789 | 5 | 54 | 1.272258 | 0.02403 | 0.244845 | LOC114261853 LOC114270285 LOC114299440 LOC114308709 LOC114310377              | <a href="http://amigo.geneontology.org/amigo/term/GO:0005789">http://amigo.geneontology.org/amigo/term/GO:0005789</a> |



|                                                                               |                        |            |   |    |          |         |          |                                                                  |                                                                                                                       |
|-------------------------------------------------------------------------------|------------------------|------------|---|----|----------|---------|----------|------------------------------------------------------------------|-----------------------------------------------------------------------------------------------------------------------|
| AP-type<br>membrane coat<br>adaptor complex                                   | cellular_c<br>omponent | GO:0030119 | 5 | 54 | 1.272258 | 0.02403 | 0.244845 | LOC114264047 LOC114272682 LOC114279052 LOC114285744 LOC114300247 | <a href="http://amigo.geneontology.org/amigo/term/GO:0030119">http://amigo.geneontology.org/amigo/term/GO:0030119</a> |
| nuclear outer<br>membrane-<br>endoplasmic<br>reticulum<br>membrane<br>network | cellular_c<br>omponent | GO:0042175 | 5 | 54 | 1.272258 | 0.02403 | 0.244845 | LOC114261853 LOC114270285 LOC114299440 LOC114308709 LOC114310377 | <a href="http://amigo.geneontology.org/amigo/term/GO:0042175">http://amigo.geneontology.org/amigo/term/GO:0042175</a> |
| endoplasmic<br>reticulum part                                                 | cellular_c<br>omponent | GO:0044432 | 5 | 55 | 1.249126 | 0.02579 | 0.244845 | LOC114261853 LOC114270285 LOC114299440 LOC114308709 LOC114310377 | <a href="http://amigo.geneontology.org/amigo/term/GO:0044432">http://amigo.geneontology.org/amigo/term/GO:0044432</a> |
| clathrin-coated<br>vesicle                                                    | cellular_c<br>omponent | GO:0030136 | 4 | 37 | 1.485448 | 0.02551 | 0.244845 | LOC114263018 LOC114264047 LOC114279052 LOC114280503              | <a href="http://amigo.geneontology.org/amigo/term/GO:0030136">http://amigo.geneontology.org/amigo/term/GO:0030136</a> |
| clathrin adaptor<br>complex                                                   | cellular_c<br>omponent | GO:0030131 | 4 | 42 | 1.308609 | 0.03842 | 0.299889 | LOC114264047 LOC114272682 LOC114279052 LOC114300247              | <a href="http://amigo.geneontology.org/amigo/term/GO:0030131">http://amigo.geneontology.org/amigo/term/GO:0030131</a> |

|                                      |                        |            |   |    |          |         |          |                                                     |
|--------------------------------------|------------------------|------------|---|----|----------|---------|----------|-----------------------------------------------------|
| clathrin coat                        | cellular_c<br>omponent | GO:0030118 | 4 | 43 | 1.278176 | 0.04138 | 0.318569 | LOC114264047 LOC114272682 LOC114279052 LOC114300247 |
| chromosomal<br>region                | cellular_c<br>omponent | GO:0098687 | 3 | 14 | 2.944369 | 0.00799 | 0.097617 | LOC114263338 LOC114269044 LOC114301033              |
| HAUS complex                         | cellular_c<br>omponent | GO:0070652 | 3 | 16 | 2.576323 | 0.01175 | 0.137573 | LOC114266363 LOC114273300 LOC114295560              |
| microtubule<br>associated<br>complex | cellular_c<br>omponent | GO:0005875 | 3 | 18 | 2.290065 | 0.01636 | 0.183886 | LOC114266363 LOC114273300 LOC114295560              |
| chloroplast<br>thylakoid             | cellular_c<br>omponent | GO:0009534 | 3 | 21 | 1.962913 | 0.02493 | 0.244845 | LOC114255793 LOC114278552 LOC114294519              |

<http://amigo.geneontology.org/amigo/term/GO:0030118>  
<http://amigo.geneontology.org/amigo/term/GO:0098687>  
<http://amigo.geneontology.org/amigo/term/GO:0070652>  
<http://amigo.geneontology.org/amigo/term/GO:0005875>  
<http://amigo.geneontology.org/amigo/term/GO:0009534>

|                                                            |                        |            |   |    |          |         |          |                                        |                                                                                                                       |
|------------------------------------------------------------|------------------------|------------|---|----|----------|---------|----------|----------------------------------------|-----------------------------------------------------------------------------------------------------------------------|
| plastid thylakoid                                          | cellular_c<br>omponent | GO:0031976 | 3 | 21 | 1.962913 | 0.02493 | 0.244845 | LOC114255793 LOC114278552 LOC114294519 | <a href="http://amigo.geneontology.org/amigo/term/GO:0031976">http://amigo.geneontology.org/amigo/term/GO:0031976</a> |
| chromosome,<br>centromeric<br>region                       | cellular_c<br>omponent | GO:0000775 | 2 | 9  | 3.05342  | 0.02899 | 0.248339 | LOC114269044 LOC114301033              | <a href="http://amigo.geneontology.org/amigo/term/GO:0000775">http://amigo.geneontology.org/amigo/term/GO:0000775</a> |
| kinetochore                                                | cellular_c<br>omponent | GO:0000776 | 2 | 9  | 3.05342  | 0.02899 | 0.248339 | LOC114269044 LOC114301033              | <a href="http://amigo.geneontology.org/amigo/term/GO:0000776">http://amigo.geneontology.org/amigo/term/GO:0000776</a> |
| CCAAT-binding<br>factor complex                            | cellular_c<br>omponent | GO:0016602 | 2 | 10 | 2.748078 | 0.03551 | 0.281079 | LOC114262465 LOC114267997              | <a href="http://amigo.geneontology.org/amigo/term/GO:0016602">http://amigo.geneontology.org/amigo/term/GO:0016602</a> |
| mitochondrial<br>DNA-directed<br>RNA polymerase<br>complex | cellular_c<br>omponent | GO:0034245 | 2 | 10 | 2.748078 | 0.03551 | 0.281079 | LOC114284490 LOC114286217              | <a href="http://amigo.geneontology.org/amigo/term/GO:0034245">http://amigo.geneontology.org/amigo/term/GO:0034245</a> |

|                                         |                    |            |    |      |          |         |          |                                                                                                                                                                                                                                                                                                                                                                                                                                                                                                                                                                                                                                                                                                                                            |                                                                                                                       |
|-----------------------------------------|--------------------|------------|----|------|----------|---------|----------|--------------------------------------------------------------------------------------------------------------------------------------------------------------------------------------------------------------------------------------------------------------------------------------------------------------------------------------------------------------------------------------------------------------------------------------------------------------------------------------------------------------------------------------------------------------------------------------------------------------------------------------------------------------------------------------------------------------------------------------------|-----------------------------------------------------------------------------------------------------------------------|
| transporter activity                    | molecular_function | GO:0005215 | 55 | 1480 | 0.78821  | 0.03322 | 0.713    | LOC114256181 LOC114257885 LOC114258544 LOC114262244 LOC114263009 LOC114263955 LOC114264162 LOC114265556 LOC114266339 LOC114267272 LOC114268746 LOC114270138 LOC114272264 LOC114272558 LOC114272871 LOC114273587 LOC114274059 LOC114274649 LOC114274664 LOC114277067 LOC114277516 LOC114277579 LOC114277736 LOC114279636 LOC114282054 LOC114282196 LOC114282237 LOC114283007 LOC114285744 LOC114288931 LOC114292691 LOC114292904 LOC114294117 LOC114295821 LOC114296661 LOC114297160 LOC114299183 LOC114302756 LOC114303887 LOC114304834 LOC114305616 LOC114306905 LOC114306907 LOC114308012 LOC114308169 LOC114309607 LOC114310140 LOC114310246 LOC114310663 LOC114310773 LOC114313302 LOC114317563 LOC114319222 LOC114322718 LOC114322838 | <a href="http://amigo.eneontology.org/amigo/terms/GO:0005215">http://amigo.eneontology.org/amigo/terms/GO:0005215</a> |
| RNA binding                             | molecular_function | GO:0003723 | 38 | 995  | 0.810031 | 0.04974 | 0.713    | LOC114256319 LOC114256818 LOC114258287 LOC114259213 LOC114259266 LOC114264726 LOC114266895 LOC114267438 LOC114269473 LOC114270006 LOC114270281 LOC114274537 LOC114277098 LOC114277977 LOC114283531 LOC114286565 LOC114286843 LOC114287160 LOC114288960 LOC114289836 LOC114290658 LOC114297329 LOC114299064 LOC114306375 LOC114308168 LOC114308381 LOC114309537 LOC114310075 LOC114312304 LOC114313053 LOC114314431 LOC114315494 LOC114317545 LOC114317813 LOC114317893 LOC114319301 LOC114320239 LOC114321491                                                                                                                                                                                                                              | <a href="http://amigo.eneontology.org/amigo/terms/GO:0003723">http://amigo.eneontology.org/amigo/terms/GO:0003723</a> |
| substrate-specific transporter activity | molecular_function | GO:0022892 | 37 | 818  | 0.959378 | 0.00503 | 0.668226 | LOC114258544 LOC114262244 LOC114263009 LOC114264162 LOC114265556 LOC114266339 LOC114272558 LOC114272871 LOC114273587 LOC114274059 LOC114274649 LOC114274664 LOC114277067 LOC114277516 LOC114277736 LOC114283007 LOC114285744 LOC114288931 LOC114292904 LOC114294117 LOC114295821 LOC114296661 LOC114297160 LOC114299183 LOC114302756 LOC114303887 LOC114304834 LOC114306905 LOC114306907 LOC114308012 LOC114308169 LOC114309607 LOC114310246 LOC114310773 LOC114313302 LOC114319222 LOC114322718                                                                                                                                                                                                                                           | <a href="http://amigo.eneontology.org/amigo/terms/GO:0022892">http://amigo.eneontology.org/amigo/terms/GO:0022892</a> |
| substrate-specific transmembrane        | molecular_function | GO:0022891 | 32 | 771  | 0.880312 | 0.02653 | 0.668226 | LOC114258544 LOC114262244 LOC114263009 LOC114264162 LOC114265556 LOC114272558 LOC114272871 LOC114273587 LOC114274059 LOC114274649 LOC114274664 LOC11                                                                                                                                                                                                                                                                                                                                                                                                                                                                                                                                                                                       | <a href="http://amigo.eneontology.org/amigo/terms/GO:0022891">http://amigo.eneontology.org/amigo/terms/GO:0022891</a> |

|                                                              |                        |            |    |     |          |         |          |                                                                                                                                                                                                                                                                             |                                                                                                                       |
|--------------------------------------------------------------|------------------------|------------|----|-----|----------|---------|----------|-----------------------------------------------------------------------------------------------------------------------------------------------------------------------------------------------------------------------------------------------------------------------------|-----------------------------------------------------------------------------------------------------------------------|
| transporter<br>activity                                      |                        |            |    |     |          |         |          | 4277067 LOC114277516 LOC114277736 LOC114283007 LOC114288931 LOC114292904 LOC114295821 LOC114296661 LOC114297160 LOC114299183 LOC114302756 LOC114303887 LOC114306905 LOC114306907 LOC114308012 LOC114308169 LOC114309607 LOC114310246 LOC114310773 LOC114319222 LOC114322718 | rg/amigo/term/GO:0022891                                                                                              |
| cation<br>transmembrane<br>transporter<br>activity           | molecular<br>_function | GO:0008324 | 20 | 461 | 0.920175 | 0.04792 | 0.713    | LOC114258544 LOC114262244 LOC114265556 LOC114274649 LOC114274664 LOC114277516 LOC114277736 LOC114283007 LOC114292904 LOC114296661 LOC114297160 LOC114299183 LOC114302756 LOC114303887 LOC114306907 LOC114309607 LOC114310246 LOC114310773 LOC114319222 LOC114322718         | <a href="http://amigo.geneontology.org/amigo/term/GO:0008324">http://amigo.geneontology.org/amigo/term/GO:0008324</a> |
| inorganic cation<br>transmembrane<br>transporter<br>activity | molecular<br>_function | GO:0022890 | 19 | 425 | 0.948213 | 0.04134 | 0.713    | LOC114258544 LOC114262244 LOC114265556 LOC114274649 LOC114274664 LOC114277516 LOC114283007 LOC114292904 LOC114296661 LOC114297160 LOC114299183 LOC114302756 LOC114303887 LOC114306907 LOC114309607 LOC114310246 LOC114310773 LOC114319222 LOC114322718                      | <a href="http://amigo.geneontology.org/amigo/term/GO:0022890">http://amigo.geneontology.org/amigo/term/GO:0022890</a> |
| isomerase<br>activity                                        | molecular<br>_function | GO:0016853 | 16 | 300 | 1.131201 | 0.01434 | 0.668226 | LOC114259692 LOC114266421 LOC114274491 LOC114280052 LOC114283401 LOC114285812 LOC114287605 LOC114287642 LOC114294805 LOC114298900 LOC114299955 LOC114310628 LOC114313099 LOC114313822 LOC114314310 LOC114319071                                                             | <a href="http://amigo.geneontology.org/amigo/term/GO:0016853">http://amigo.geneontology.org/amigo/term/GO:0016853</a> |
| metal ion<br>transmembrane<br>transporter<br>activity        | molecular<br>_function | GO:0046873 | 14 | 212 | 1.400662 | 0.0036  | 0.668226 | LOC114262244 LOC114265556 LOC114274649 LOC114274664 LOC114277516 LOC114283007 LOC114292904 LOC114302756 LOC114303887 LOC114306907 LOC114309607 LOC114310246 LOC114310773 LOC114322718                                                                                       | <a href="http://amigo.geneontology.org/amigo/term/GO:0046873">http://amigo.geneontology.org/amigo/term/GO:0046873</a> |

|                                             |                    |            |    |     |          |         |          |                                                                                                                                                             |                                                                                                                       |
|---------------------------------------------|--------------------|------------|----|-----|----------|---------|----------|-------------------------------------------------------------------------------------------------------------------------------------------------------------|-----------------------------------------------------------------------------------------------------------------------|
| ubiquitin-protein transferase activity      | molecular_function | GO:0004842 | 12 | 219 | 1.162193 | 0.02607 | 0.668226 | LOC114265534 LOC114269751 LOC114273172 LOC114277058 LOC114282048 LOC114284071 LOC114285675 LOC114288717 LOC114290633 LOC114291848 LOC114299265 LOC114313589 | <a href="http://amigo.geneontology.org/amigo/term/GO:0004842">http://amigo.geneontology.org/amigo/term/GO:0004842</a> |
| ubiquitin-like protein transferase activity | molecular_function | GO:0019787 | 12 | 219 | 1.162193 | 0.02607 | 0.668226 | LOC114265534 LOC114269751 LOC114273172 LOC114277058 LOC114282048 LOC114284071 LOC114285675 LOC114288717 LOC114290633 LOC114291848 LOC114299265 LOC114313589 | <a href="http://amigo.geneontology.org/amigo/term/GO:0019787">http://amigo.geneontology.org/amigo/term/GO:0019787</a> |
| exopeptidase activity                       | molecular_function | GO:0008238 | 11 | 153 | 1.524904 | 0.005   | 0.668226 | LOC114256689 LOC114262111 LOC114262741 LOC114277669 LOC114278179 LOC114287726 LOC114292062 LOC114300669 LOC114305318 LOC114310949 LOC114314487              | <a href="http://amigo.geneontology.org/amigo/term/GO:0008238">http://amigo.geneontology.org/amigo/term/GO:0008238</a> |
| cytoskeletal protein binding                | molecular_function | GO:0008092 | 11 | 209 | 1.116317 | 0.04126 | 0.713    | LOC114260629 LOC114268986 LOC114272419 LOC114272676 LOC114275505 LOC114277245 LOC114294661 LOC114307019 LOC114308378 LOC114315282 LOC114322539              | <a href="http://amigo.geneontology.org/amigo/term/GO:0008092">http://amigo.geneontology.org/amigo/term/GO:0008092</a> |
| serine-type carboxypeptidase activity       | molecular_function | GO:0004185 | 9  | 134 | 1.424554 | 0.01602 | 0.668226 | LOC114256689 LOC114262111 LOC114262741 LOC114277669 LOC114278179 LOC114287726 LOC114300669 LOC114305318 LOC114314487                                        | <a href="http://amigo.geneontology.org/amigo/term/GO:0004185">http://amigo.geneontology.org/amigo/term/GO:0004185</a> |

|                                                              |                        |            |   |     |          |         |          |                                                                                                                      |                                                                                                                       |
|--------------------------------------------------------------|------------------------|------------|---|-----|----------|---------|----------|----------------------------------------------------------------------------------------------------------------------|-----------------------------------------------------------------------------------------------------------------------|
| serine-type<br>exopeptidase<br>activity                      | molecular<br>_function | GO:0070008 | 9 | 134 | 1.424554 | 0.01602 | 0.668226 | LOC114256689 LOC114262111 LOC114262741 LOC114277669 LOC114278179 LOC114287726 LOC114300669 LOC114305318 LOC114314487 | <a href="http://amigo.geneontology.org/amigo/term/GO:0070008">http://amigo.geneontology.org/amigo/term/GO:0070008</a> |
| carboxypeptidase<br>activity                                 | molecular<br>_function | GO:0004180 | 9 | 135 | 1.414002 | 0.01674 | 0.668226 | LOC114256689 LOC114262111 LOC114262741 LOC114277669 LOC114278179 LOC114287726 LOC114300669 LOC114305318 LOC114314487 | <a href="http://amigo.geneontology.org/amigo/term/GO:0004180">http://amigo.geneontology.org/amigo/term/GO:0004180</a> |
| secondary active<br>transmembrane<br>transporter<br>activity | molecular<br>_function | GO:0015291 | 9 | 163 | 1.171106 | 0.04779 | 0.713    | LOC114272558 LOC114272871 LOC114277516 LOC114279636 LOC114296661 LOC114297160 LOC114299183 LOC114306905 LOC114319222 | <a href="http://amigo.geneontology.org/amigo/term/GO:0015291">http://amigo.geneontology.org/amigo/term/GO:0015291</a> |
| potassium ion<br>transmembrane<br>transporter<br>activity    | molecular<br>_function | GO:0015079 | 7 | 96  | 1.546565 | 0.02136 | 0.668226 | LOC114274649 LOC114283007 LOC114302756 LOC114306907 LOC114309607 LOC114310246 LOC114310773                           | <a href="http://amigo.geneontology.org/amigo/term/GO:0015079">http://amigo.geneontology.org/amigo/term/GO:0015079</a> |
| tubulin binding                                              | molecular<br>_function | GO:0015631 | 7 | 102 | 1.45559  | 0.02861 | 0.668226 | LOC114260629 LOC114268986 LOC114277245 LOC114294661 LOC114308378 LOC114315282 LOC114322539                           | <a href="http://amigo.geneontology.org/amigo/term/GO:0015631">http://amigo.geneontology.org/amigo/term/GO:0015631</a> |

|                                        |                    |            |   |     |          |         |          |                                                                                            |                                                                                                                       |
|----------------------------------------|--------------------|------------|---|-----|----------|---------|----------|--------------------------------------------------------------------------------------------|-----------------------------------------------------------------------------------------------------------------------|
| peptidyl-prolyl                        |                    |            |   |     |          |         |          |                                                                                            | <a href="http://amigo.geneontology.org/amigo/term/GO:0003755">http://amigo.geneontology.org/amigo/term/GO:0003755</a> |
| cis-trans isomerase activity           | molecular_function | GO:0003755 | 7 | 112 | 1.325627 | 0.0441  | 0.713    | LOC114259692 LOC114266421 LOC114280052 LOC114283401 LOC114287642 LOC114313099 LOC114313822 |                                                                                                                       |
| cis-trans isomerase activity           | molecular_function | GO:0016859 | 7 | 112 | 1.325627 | 0.0441  | 0.713    | LOC114259692 LOC114266421 LOC114280052 LOC114283401 LOC114287642 LOC114313099 LOC114313822 | <a href="http://amigo.geneontology.org/amigo/term/GO:0016859">http://amigo.geneontology.org/amigo/term/GO:0016859</a> |
| ubiquitin protein ligase activity      | molecular_function | GO:0061630 | 6 | 69  | 1.84435  | 0.0147  | 0.668226 | LOC114269751 LOC114273172 LOC114285675 LOC114288717 LOC114291848 LOC114299265              | <a href="http://amigo.geneontology.org/amigo/term/GO:0061630">http://amigo.geneontology.org/amigo/term/GO:0061630</a> |
| ubiquitin-like protein ligase activity | molecular_function | GO:0061659 | 6 | 69  | 1.84435  | 0.0147  | 0.668226 | LOC114269751 LOC114273172 LOC114285675 LOC114288717 LOC114291848 LOC114299265              | <a href="http://amigo.geneontology.org/amigo/term/GO:0061659">http://amigo.geneontology.org/amigo/term/GO:0061659</a> |
| intramolecular transferase activity    | molecular_function | GO:0016866 | 6 | 78  | 1.631541 | 0.02541 | 0.668226 | LOC114285812 LOC114294805 LOC114299955 LOC114310628 LOC114314310 LOC114319071              | <a href="http://amigo.geneontology.org/amigo/term/GO:0016866">http://amigo.geneontology.org/amigo/term/GO:0016866</a> |



|                                                             |                        |            |   |    |          |         |          |                                                                  |                                                                                                                       |
|-------------------------------------------------------------|------------------------|------------|---|----|----------|---------|----------|------------------------------------------------------------------|-----------------------------------------------------------------------------------------------------------------------|
| voltage-gated<br>potassium<br>channel activity              | molecular<br>_function | GO:0005249 | 5 | 38 | 2.790793 | 0.00454 | 0.668226 | LOC114274649 LOC114302756 LOC114306907 LOC114310246 LOC114310773 | <a href="http://amigo.geneontology.org/amigo/term/GO:0005249">http://amigo.geneontology.org/amigo/term/GO:0005249</a> |
| potassium<br>channel activity                               | molecular<br>_function | GO:0005267 | 5 | 43 | 2.466282 | 0.00774 | 0.668226 | LOC114274649 LOC114302756 LOC114306907 LOC114310246 LOC114310773 | <a href="http://amigo.geneontology.org/amigo/term/GO:0005267">http://amigo.geneontology.org/amigo/term/GO:0005267</a> |
| protein<br>transporter<br>activity                          | molecular<br>_function | GO:0008565 | 5 | 44 | 2.41023  | 0.00853 | 0.668226 | LOC114266339 LOC114285744 LOC114294117 LOC114304834 LOC114313302 | <a href="http://amigo.geneontology.org/amigo/term/GO:0008565">http://amigo.geneontology.org/amigo/term/GO:0008565</a> |
| voltage-gated<br>cation channel<br>activity                 | molecular<br>_function | GO:0022843 | 5 | 45 | 2.35667  | 0.00938 | 0.668226 | LOC114274649 LOC114302756 LOC114306907 LOC114310246 LOC114310773 | <a href="http://amigo.geneontology.org/amigo/term/GO:0022843">http://amigo.geneontology.org/amigo/term/GO:0022843</a> |
| transferase<br>activity,<br>transferring<br>pentosyl groups | molecular<br>_function | GO:0016763 | 5 | 46 | 2.305438 | 0.01027 | 0.668226 | LOC114261073 LOC114270291 LOC114283651 LOC114285167 LOC114293178 | <a href="http://amigo.geneontology.org/amigo/term/GO:0016763">http://amigo.geneontology.org/amigo/term/GO:0016763</a> |

|                                                    |                    |            |   |    |          |         |          |                                                                  |                                                                                                                       |
|----------------------------------------------------|--------------------|------------|---|----|----------|---------|----------|------------------------------------------------------------------|-----------------------------------------------------------------------------------------------------------------------|
| S-acyltransferase activity                         | molecular_function | GO:0016417 | 5 | 52 | 2.039426 | 0.01693 | 0.668226 | LOC114258341 LOC114290818 LOC114290822 LOC114294075 LOC114295540 | <a href="http://amigo.geneontology.org/amigo/term/GO:0016417">http://amigo.geneontology.org/amigo/term/GO:0016417</a> |
| inorganic anion transmembrane transporter activity | molecular_function | GO:0015103 | 5 | 55 | 1.928184 | 0.02113 | 0.668226 | LOC114272558 LOC114272871 LOC114274059 LOC114277067 LOC114306905 | <a href="http://amigo.geneontology.org/amigo/term/GO:0015103">http://amigo.geneontology.org/amigo/term/GO:0015103</a> |
| cation channel activity                            | molecular_function | GO:0005261 | 5 | 57 | 1.860529 | 0.02427 | 0.668226 | LOC114274649 LOC114302756 LOC114306907 LOC114310246 LOC114310773 | <a href="http://amigo.geneontology.org/amigo/term/GO:0005261">http://amigo.geneontology.org/amigo/term/GO:0005261</a> |
| ligase activity, forming carbon-nitrogen bonds     | molecular_function | GO:0016879 | 4 | 34 | 2.495297 | 0.01617 | 0.668226 | LOC114279846 LOC114287012 LOC114296732 LOC114304702              | <a href="http://amigo.geneontology.org/amigo/term/GO:0016879">http://amigo.geneontology.org/amigo/term/GO:0016879</a> |
| protein heterodimerization activity                | molecular_function | GO:0046982 | 4 | 40 | 2.121003 | 0.02785 | 0.668226 | LOC114289658 LOC114291770 LOC114303971 LOC114304031              | <a href="http://amigo.geneontology.org/amigo/term/GO:0046982">http://amigo.geneontology.org/amigo/term/GO:0046982</a> |

|                                                                   |                    |            |   |    |          |         |          |                                                     |                                                                                                                       |
|-------------------------------------------------------------------|--------------------|------------|---|----|----------|---------|----------|-----------------------------------------------------|-----------------------------------------------------------------------------------------------------------------------|
| N-methyltransferase activity                                      | molecular_function | GO:0008170 | 4 | 41 | 2.069271 | 0.03017 | 0.683467 | LOC114293322 LOC114302063 LOC114310493 LOC114323269 | <a href="http://amigo.geneontology.org/amigo/term/GO:0008170">http://amigo.geneontology.org/amigo/term/GO:0008170</a> |
| palmitoyltransferase activity                                     | molecular_function | GO:0016409 | 4 | 44 | 1.928184 | 0.03783 | 0.713    | LOC114258341 LOC114290818 LOC114290822 LOC114295540 | <a href="http://amigo.geneontology.org/amigo/term/GO:0016409">http://amigo.geneontology.org/amigo/term/GO:0016409</a> |
| protein-cysteine S-palmitoyltransferase activity                  | molecular_function | GO:0019706 | 4 | 44 | 1.928184 | 0.03783 | 0.713    | LOC114258341 LOC114290818 LOC114290822 LOC114295540 | <a href="http://amigo.geneontology.org/amigo/term/GO:0019706">http://amigo.geneontology.org/amigo/term/GO:0019706</a> |
| protein-cysteine S-acyltransferase activity                       | molecular_function | GO:0019707 | 4 | 44 | 1.928184 | 0.03783 | 0.713    | LOC114258341 LOC114290818 LOC114290822 LOC114295540 | <a href="http://amigo.geneontology.org/amigo/term/GO:0019707">http://amigo.geneontology.org/amigo/term/GO:0019707</a> |
| nucleobase-containing compound transmembrane transporter activity | molecular_function | GO:0015932 | 4 | 48 | 1.767502 | 0.04961 | 0.713    | LOC114263009 LOC114273587 LOC114288931 LOC114308012 | <a href="http://amigo.geneontology.org/amigo/term/GO:0015932">http://amigo.geneontology.org/amigo/term/GO:0015932</a> |

|                                                       |                    |            |   |    |          |         |          |                                                     |                                                                                                                       |
|-------------------------------------------------------|--------------------|------------|---|----|----------|---------|----------|-----------------------------------------------------|-----------------------------------------------------------------------------------------------------------------------|
| carbohydrate derivative transporter activity          | molecular_function | GO:1901505 | 4 | 48 | 1.767502 | 0.04961 | 0.713    | LOC114263009 LOC114273587 LOC114288931 LOC114308012 | <a href="http://amigo.geneontology.org/amigo/term/GO:1901505">http://amigo.geneontology.org/amigo/term/GO:1901505</a> |
| ubiquitin conjugating enzyme activity                 | molecular_function | GO:0061631 | 3 | 14 | 4.545006 | 0.00691 | 0.668226 | LOC114282048 LOC114284071 LOC114313589              | <a href="http://amigo.geneontology.org/amigo/term/GO:0061631">http://amigo.geneontology.org/amigo/term/GO:0061631</a> |
| ubiquitin-like protein conjugating enzyme activity    | molecular_function | GO:0061650 | 3 | 14 | 4.545006 | 0.00691 | 0.668226 | LOC114282048 LOC114284071 LOC114313589              | <a href="http://amigo.geneontology.org/amigo/term/GO:0061650">http://amigo.geneontology.org/amigo/term/GO:0061650</a> |
| pyruvate dehydrogenase activity                       | molecular_function | GO:0004738 | 3 | 21 | 3.030004 | 0.02174 | 0.668226 | LOC114266618 LOC114288195 LOC114317106              | <a href="http://amigo.geneontology.org/amigo/term/GO:0004738">http://amigo.geneontology.org/amigo/term/GO:0004738</a> |
| pyruvate dehydrogenase (acetyl-transferring) activity | molecular_function | GO:0004739 | 3 | 21 | 3.030004 | 0.02174 | 0.668226 | LOC114266618 LOC114288195 LOC114317106              | <a href="http://amigo.geneontology.org/amigo/term/GO:0004739">http://amigo.geneontology.org/amigo/term/GO:0004739</a> |

|                                                             |                    |            |   |    |          |         |          |                                        |                                                                                                                       |
|-------------------------------------------------------------|--------------------|------------|---|----|----------|---------|----------|----------------------------------------|-----------------------------------------------------------------------------------------------------------------------|
| secondary active sulfate transmembrane transporter activity | molecular_function | GO:0008271 | 3 | 23 | 2.766525 | 0.02775 | 0.668226 | LOC114272558 LOC114272871 LOC114306905 | <a href="http://amigo.geneontology.org/amigo/term/GO:0008271">http://amigo.geneontology.org/amigo/term/GO:0008271</a> |
| sulfate transmembrane transporter activity                  | molecular_function | GO:0015116 | 3 | 23 | 2.766525 | 0.02775 | 0.668226 | LOC114272558 LOC114272871 LOC114306905 | <a href="http://amigo.geneontology.org/amigo/term/GO:0015116">http://amigo.geneontology.org/amigo/term/GO:0015116</a> |
| histone methyltransferase activity                          | molecular_function | GO:0042054 | 3 | 23 | 2.766525 | 0.02775 | 0.668226 | LOC114293322 LOC114302063 LOC114310493 | <a href="http://amigo.geneontology.org/amigo/term/GO:0042054">http://amigo.geneontology.org/amigo/term/GO:0042054</a> |
| phosphatase regulator activity                              | molecular_function | GO:0019208 | 3 | 26 | 2.447311 | 0.03824 | 0.713    | LOC114260716 LOC114265969 LOC114292006 | <a href="http://amigo.geneontology.org/amigo/term/GO:0019208">http://amigo.geneontology.org/amigo/term/GO:0019208</a> |
| protein phosphatase regulator activity                      | molecular_function | GO:0019888 | 3 | 26 | 2.447311 | 0.03824 | 0.713    | LOC114260716 LOC114265969 LOC114292006 | <a href="http://amigo.geneontology.org/amigo/term/GO:0019888">http://amigo.geneontology.org/amigo/term/GO:0019888</a> |

|                                                                                               |                    |            |   |    |          |         |          |                                        |                                                                                                                       |
|-----------------------------------------------------------------------------------------------|--------------------|------------|---|----|----------|---------|----------|----------------------------------------|-----------------------------------------------------------------------------------------------------------------------|
| sulfur compound                                                                               |                    |            |   |    |          |         |          |                                        | <a href="http://amigo.geneontology.org/amigo/term/GO:1901682">http://amigo.geneontology.org/amigo/term/GO:1901682</a> |
| transmembrane transporter activity                                                            | molecular_function | GO:1901682 | 3 | 26 | 2.447311 | 0.03824 | 0.713    | LOC114272558 LOC114272871 LOC114306905 |                                                                                                                       |
| oxidoreductase activity, acting on the aldehyde or oxo group of donors, disulfide as acceptor | molecular_function | GO:0016624 | 3 | 27 | 2.35667  | 0.04212 | 0.713    | LOC114266618 LOC114288195 LOC114317106 | <a href="http://amigo.geneontology.org/amigo/term/GO:0016624">http://amigo.geneontology.org/amigo/term/GO:0016624</a> |
| cysteine-type endopeptidase inhibitor activity                                                | molecular_function | GO:0004869 | 3 | 28 | 2.272503 | 0.04619 | 0.713    | LOC114274207 LOC114281078 LOC114301921 | <a href="http://amigo.geneontology.org/amigo/term/GO:0004869">http://amigo.geneontology.org/amigo/term/GO:0004869</a> |
| phosphoribosylformylglycinamidine synthase activity                                           | molecular_function | GO:0004642 | 2 | 2  | 21.21003 | 0.00084 | 0.668226 | LOC114287012 LOC114304702              | <a href="http://amigo.geneontology.org/amigo/term/GO:0004642">http://amigo.geneontology.org/amigo/term/GO:0004642</a> |
| S-methyl-5-thioribose kinase activity                                                         | molecular_function | GO:0046522 | 2 | 3  | 14.14002 | 0.00246 | 0.668226 | LOC114321004 LOC114321594              | <a href="http://amigo.geneontology.org/amigo/term/GO:0046522">http://amigo.geneontology.org/amigo/term/GO:0046522</a> |

|                                                                                                                          |                    |            |   |   |          |         |          |                           |                                                                                                                       |
|--------------------------------------------------------------------------------------------------------------------------|--------------------|------------|---|---|----------|---------|----------|---------------------------|-----------------------------------------------------------------------------------------------------------------------|
| aspartic endopeptidase activity, intramembrane cleaving carbon-nitrogen ligase activity, with glutamine as amido-N-donor | molecular_function | GO:0042500 | 2 | 4 | 10.60501 | 0.00482 | 0.668226 | LOC114281818 LOC114295456 | <a href="http://amigo.geneontology.org/amigo/term/GO:0042500">http://amigo.geneontology.org/amigo/term/GO:0042500</a> |
| double-stranded RNA binding                                                                                              | molecular_function | GO:0003725 | 2 | 6 | 7.070009 | 0.0116  | 0.668226 | LOC114256319 LOC114308168 | <a href="http://amigo.geneontology.org/amigo/term/GO:0003725">http://amigo.geneontology.org/amigo/term/GO:0003725</a> |
| RNA stem-loop binding                                                                                                    | molecular_function | GO:0035613 | 2 | 8 | 5.302507 | 0.02084 | 0.668226 | LOC114264726 LOC114299064 | <a href="http://amigo.geneontology.org/amigo/term/GO:0035613">http://amigo.geneontology.org/amigo/term/GO:0035613</a> |
| snRNA stem-loop binding                                                                                                  | molecular_function | GO:0035614 | 2 | 8 | 5.302507 | 0.02084 | 0.668226 | LOC114264726 LOC114299064 | <a href="http://amigo.geneontology.org/amigo/term/GO:0035614">http://amigo.geneontology.org/amigo/term/GO:0035614</a> |

|                                     |                    |            |   |    |          |         |          |                           |                                                                                                                       |
|-------------------------------------|--------------------|------------|---|----|----------|---------|----------|---------------------------|-----------------------------------------------------------------------------------------------------------------------|
| membrane insertase activity         | molecular_function | GO:0032977 | 2 | 9  | 4.71334  | 0.02629 | 0.668226 | LOC114294117 LOC114313302 | <a href="http://amigo.geneontology.org/amigo/term/GO:0032977">http://amigo.geneontology.org/amigo/term/GO:0032977</a> |
| D-aminoacyl-tRNA deacylase activity | molecular_function | GO:0051499 | 2 | 9  | 4.71334  | 0.02629 | 0.668226 | LOC114263059 LOC114320565 | <a href="http://amigo.geneontology.org/amigo/term/GO:0051499">http://amigo.geneontology.org/amigo/term/GO:0051499</a> |
| omega peptidase activity            | molecular_function | GO:0008242 | 2 | 11 | 3.856369 | 0.03866 | 0.713    | LOC114292062 LOC114310949 | <a href="http://amigo.geneontology.org/amigo/term/GO:0008242">http://amigo.geneontology.org/amigo/term/GO:0008242</a> |
| snRNA binding                       | molecular_function | GO:0017069 | 2 | 11 | 3.856369 | 0.03866 | 0.713    | LOC114264726 LOC114299064 | <a href="http://amigo.geneontology.org/amigo/term/GO:0017069">http://amigo.geneontology.org/amigo/term/GO:0017069</a> |

**Table S4: KEGG pathway enrichment list of different expression genes**

| Term | Database | ID | Input_number | Background_number | Rich_factor | P_Value | Corrected P_Value | Input |
|------|----------|----|--------------|-------------------|-------------|---------|-------------------|-------|
|------|----------|----|--------------|-------------------|-------------|---------|-------------------|-------|



|                                   |              |         |    |     |          |          |          |                                                                                                                                                                                                                                                                                                                                                                                                                                                                                                                                                                                                                                                                              |
|-----------------------------------|--------------|---------|----|-----|----------|----------|----------|------------------------------------------------------------------------------------------------------------------------------------------------------------------------------------------------------------------------------------------------------------------------------------------------------------------------------------------------------------------------------------------------------------------------------------------------------------------------------------------------------------------------------------------------------------------------------------------------------------------------------------------------------------------------------|
| Biosynthesis of amino acids       | KEGG PATHWAY | ko01230 | 23 | 228 | 2.723932 | 1.23E-05 | 1        | K01079:LOC114262904 K00891:LOC114305860 K00811:LOC114278611 K00872:LOC114264777 K00873:LOC114279530,LOC114303494 K01703:LOC114312831 K01647:LOC114272994,LOC114304692 K00134:LOC114265293,LOC114312375,LOC114293203 K01687:LOC114270240 K05359:LOC114285039 K00549:LOC114259972,LOC114263592,LOC114256414 K10206:LOC114278448 K01696:LOC114257089,LOC114268516 K15849:LOC114264149 K00948:LOC114308505,LOC114279491 K00826:LOC114261622 K01733:LOC114270957 K00615:LOC114256926 K01653:LOC114308780 K01738:LOC114309955,LOC114312771 K00800:LOC114262417 K00600:LOC114274060 K01803:LOC114290849                                                                             |
| Carbon metabolism                 | KEGG PATHWAY | ko01200 | 23 | 342 | 1.815955 | 0.004217 | 0.392526 | K01079:LOC114262904 K15919:LOC114314980,LOC114314982,LOC114270024,1fa930de-db9f-416e-9354-3f9eebe0e865 K00600:LOC114274060 K01602:LOC114258036 K01810:LOC114298900 K00873:LOC114279530,LOC114303494 K00626:LOC114287927,LOC114271198 K00261:LOC114319915 K00134:LOC114265293,LOC114312375,LOC114293203 K00051:LOC114322741 K01647:LOC114272994,LOC114304692 K01006:LOC114268500,LOC114258102 K00948:LOC114308505,LOC114279491 K01610:LOC114323464 K00615:LOC114256926 K01738:LOC114309955,LOC114312771 K01803:LOC114290849 K18121:LOC114301920 K00162:LOC114324001 K00029:LOC114296210,LOC114281724,LOC114288936 K00028:LOC114300619 K00025:LOC114274248 K00026:LOC114291262 |
| Spliceosome                       | KEGG PATHWAY | ko03040 | 18 | 121 | 4.016894 | 4.52E-07 | 1        | K12741:LOC114321862 K11097:LOC114279504 K11092:LOC114262225 K12834:LOC114289485 K12890:LOC114289352,LOC114289553 K12836:LOC114264907 K10599:LOC114323434 K12830:LOC114313044 K12823:LOC114315987 K12863:LOC114309224,LOC114310529,LOC114268005,LOC114301756 K03283:LOC114299320 K12848:LOC114305521,LOC114313882 K12812:LOC114284487 K12852:LOC114318113 K12869:LOC114266169,LOC114302931 K11088:LOC114299281 K12819:LOC114291228 K12818:LOC114268309                                                                                                                                                                                                                        |
| Plant hormone signal transduction | KEGG PATHWAY | ko04075 | 16 | 45  | 9.600874 | 2.26E-12 | 1        | K14487:LOC114316026,LOC114295855,6c95dd1a-1cf9-4da4-b0ed-0f47c6669413 K13416:LOC114306732 K14504:LOC114279112 K14431:LOC114273443 K14500:LOC114297314 K14484:LOC114278388 K14497:LOC114274147,LOC114279611 K14488:LOC114293599,LOC114324111,LOC114259204,LOC114264369,LOC114276957 K14489:LOC114303850 K13464:LOC114283520,LOC114317541,LOC114319171,LOC114275107,LOC114275306,LOC114284698,LOC114275120 K12126:LOC114266873 K13449:LOC114301909,LOC114302248,LOC114256256,LOC114258858 K13422:LOC114266177,LOC114266                                                                                                                                                        |

|                               |              |         |    |     |          |          |   |                                                                                                                                                                                                                                                                                                                                                                                                                                                                                                                                                                                                                                                                                                                                                                                                                         |
|-------------------------------|--------------|---------|----|-----|----------|----------|---|-------------------------------------------------------------------------------------------------------------------------------------------------------------------------------------------------------------------------------------------------------------------------------------------------------------------------------------------------------------------------------------------------------------------------------------------------------------------------------------------------------------------------------------------------------------------------------------------------------------------------------------------------------------------------------------------------------------------------------------------------------------------------------------------------------------------------|
|                               |              |         |    |     |          |          |   | 457,LOC114277806 K13946:LOC114279578,LOC114289511 K14505:LOC114278610 K14516:LOC114260196,LOC114277384                                                                                                                                                                                                                                                                                                                                                                                                                                                                                                                                                                                                                                                                                                                  |
| Purine metabolism             | KEGG PATHWAY | ko00230 | 16 | 269 | 1.606094 | 0.042195 | 1 | K00856:LOC114269231 K00365:LOC114258180 K03026:LOC114304722,LOC114282663 K18532:LOC114269644 K11808:LOC114292370 K03006:LOC114318130 K01835:LOC114275532 K00948:LOC114308505,LOC114279491 K03011:LOC114256160,LOC114297242 K02325:LOC114291246,LOC114291245 K00764:LOC114307059 K00873:LOC114279530,LOC114303494 K00860:LOC114306667 K00940:LOC114256803 K01490:LOC114291284 K18151:LOC114284174                                                                                                                                                                                                                                                                                                                                                                                                                        |
|                               |              |         |    |     |          |          |   | K13416:LOC114306732 K13412:LOC114272449 K13448:LOC114286337,LOC114258987,LOC114264686,LOC114273484,LOC114281606,LOC114297997 K12795:LOC114258878 K00864:LOC114264896 K13420:LOC114309071 K13429:LOC114280263 K05391:LOC114302736,LOC114273051 K04368:LOC114322094 K13449:LOC114301909,LOC114302248,LOC114256256,LOC114258858 K13457:LOC114297666,LOC114299307,LOC114308410,LOC114316557,LOC114318670,LOC114319469,LOC114257295,LOC114262805,LOC114265731,LOC114269792,LOC114293409,LOC114295723,LOC114301675,LOC114304506,LOC114304501,LOC114297284,4aa7825b-1d20-466a-8bb3-5723fac4f10a K13459:LOC114307046,LOC114307116,LOC114318567,LOC114318584,LOC114318571,LOC114324024,LOC114278662,LOC114279959,LOC114283223,LOC114288092,LOC114299624 K13430:LOC114278869 K13424:LOC114305679,LOC114281649 K02183:LOC114314441 |
| Plant-pathogen interaction    | KEGG PATHWAY | ko04626 | 15 | 78  | 5.19278  | 1.35E-07 | 1 | K03064:LOC114270085 K15979:LOC114286525,LOC114262801,LOC114264721 K03039:LOC114272623 K04730:LOC114263648 K03006:LOC114318130 K07936:LOC114288302 K03031:LOC114281469 K03026:LOC114304722,LOC114282663 K11838:LOC114316142,LOC114287669,LOC114314010,LOC114287686 K02206:LOC114257899,LOC114310342 K03035:LOC114299878 K03011:LOC114256160,LOC114297242 K03032:LOC114321610 K06630:LOC114321301 K03283:LOC114299320                                                                                                                                                                                                                                                                                                                                                                                                     |
| Epstein-Barr virus infection  | KEGG PATHWAY | ko05169 | 15 | 164 | 2.469737 | 0.001119 | 1 | K01193:LOC114308954,LOC114318847 K00703:LOC114275517 K00847:LOC114277756,LOC114286711 K15920:LOC114281025 K08678:LOC114292694,LOC114306240,LOC114286559 K08679:LOC114298289 K16055:LOC114264315,LOC114291905 K01810:LOC114298900 K00688:LOC114309499,LOC114273215,LOC114287129 K01051:LOC114267683,LOC114300238 K01188:LOC114299631,LOC114308775,LOC114308776,LOC                                                                                                                                                                                                                                                                                                                                                                                                                                                       |
| Starch and sucrose metabolism | KEGG PATHWAY | ko00500 | 14 | 109 | 3.468205 | 4.73E-05 | 1 |                                                                                                                                                                                                                                                                                                                                                                                                                                                                                                                                                                                                                                                                                                                                                                                                                         |

|                                             |              |         |    |     |          |          |          |                                                                                                                                                                                                                                                                                                                                                                                                                                                                        |
|---------------------------------------------|--------------|---------|----|-----|----------|----------|----------|------------------------------------------------------------------------------------------------------------------------------------------------------------------------------------------------------------------------------------------------------------------------------------------------------------------------------------------------------------------------------------------------------------------------------------------------------------------------|
|                                             |              |         |    |     |          |          |          | 114262994,LOC114286568,LOC114260881 K05349:LOC114257730 K01835:LOC114275532 K00695:LOC114301859                                                                                                                                                                                                                                                                                                                                                                        |
| Ubiquitin mediated proteolysis              | KEGG PATHWAY | ko04120 | 13 | 125 | 2.808256 | 0.000722 | 1        | K10581:LOC114260253 K10590:LOC114302232,LOC114302233 K03869:LOC114257677 K10579:LOC114307910 K10576:LOC114317210 K10589:LOC114282048 K10573:LOC114324051 K10599:LOC114323434 K04706:LOC114271266,LOC114271929 K03351:LOC114319643 K03347:LOC114258709,LOC114270403,LOC114297677 K12456:LOC114311559 K10610:LOC114276759                                                                                                                                                |
| Protein processing in endoplasmic reticulum | KEGG PATHWAY | ko04141 | 13 | 140 | 2.507371 | 0.002054 | 1        | K10636:LOC114303410,LOC114268447,LOC114291616 K13989:LOC114262516 K09523:LOC114287416 K07953:LOC114294629 K10666:LOC114280446 K10839:LOC114257002,LOC114274812,LOC114296331 K07342:LOC114320891 K13993:LOC114309274,LOC114273491,LOC114277783,LOC114285028,LOC114286642,LOC114296229 K03347:LOC114258709,LOC114270403,LOC114297677 K01456:LOC114275786,LOC114313061,LOC114303820 K13250:LOC114285734 K09580:LOC114315296 K03283:LOC114299320                           |
| Ribosome                                    | KEGG PATHWAY | ko03010 | 13 | 143 | 2.454769 | 0.00248  | 0.820038 | K02863:LOC114271524,LOC114278306,LOC114291232 K02923:LOC114310042 K02870:LOC114302116 K02927:LOC114317582 K02865:LOC114288416 K02930:LOC114259181 K02929:LOC114262416 K02916:LOC114296454 K02883:LOC114259082 K02958:LOC114304094 K02977:LOC114317886 K02971:LOC114304030 K02973:LOC114281237                                                                                                                                                                          |
| Amino sugar and nucleotide sugar metabolism | KEGG PATHWAY | ko00520 | 13 | 149 | 2.355919 | 0.00355  | 1        | K01810:LOC114298900 K01809:LOC114322407,LOC114322408 K01183:LOC114307937,LOC114261097,LOC114284838,LOC114308106,LOC114314739,LOC114264556,LOC114281381,LOC114299174,LOC114299172,LOC114280420 K00847:LOC114277756,LOC114286711 K15920:LOC114281025 K08678:LOC114292694,LOC114306240,LOC114286559 K08679:LOC114298289 K20547:LOC114277355 K01835:LOC114275532 K13379:LOC114286196 K12447:LOC114261735,LOC114268490,LOC114289465 K00326:LOC114257590 K17497:LOC114285978 |
| Cysteine and methionine metabolism          | KEGG PATHWAY | ko00270 | 12 | 96  | 3.375307 | 0.000212 | 0.863045 | K01919:LOC114304004 K05933:LOC114306545 K17398:LOC114313021 K00026:LOC114291262 K00811:LOC114278611 K00827:LOC114272618,LOC114278956,LOC114281666 K00826:LOC114261622 K00025:LOC114274248 K01762:LOC114279312 K00558:LOC114280201,LOC114280170,LOC114281846 K01738:LOC114309955,LOC114312771 K00549:LOC114259972,LOC114263592,LOC114256414                                                                                                                             |

|                                             |              |         |    |     |          |          |          |                                                                                                                                                                                                                                                                                                                                                                                                                                                                                                                                                                                                                                                                                                                                                                                                                                                                                                                                                                                                                                                                                                                                                                                                                                                                                                                                                                                                                                                                                                                                                                                                                                                                                                                                                                                                                                                                                                                                                                                       |
|---------------------------------------------|--------------|---------|----|-----|----------|----------|----------|---------------------------------------------------------------------------------------------------------------------------------------------------------------------------------------------------------------------------------------------------------------------------------------------------------------------------------------------------------------------------------------------------------------------------------------------------------------------------------------------------------------------------------------------------------------------------------------------------------------------------------------------------------------------------------------------------------------------------------------------------------------------------------------------------------------------------------------------------------------------------------------------------------------------------------------------------------------------------------------------------------------------------------------------------------------------------------------------------------------------------------------------------------------------------------------------------------------------------------------------------------------------------------------------------------------------------------------------------------------------------------------------------------------------------------------------------------------------------------------------------------------------------------------------------------------------------------------------------------------------------------------------------------------------------------------------------------------------------------------------------------------------------------------------------------------------------------------------------------------------------------------------------------------------------------------------------------------------------------------|
| alpha-Linolenic acid metabolism             | KEGG PATHWAY | ko00592 | 11 | 23  | 12.91422 | 1.42E-10 | 1        | K14674:LOC114288695 K05894:LOC114299110 K18857:LOC114289115,LOC114294197,LOC114295536,LOC114294194,LOC114295484,LOC114295535,LOC114303265 K08241:LOC114285352,LOC114288630,LOC114310687 K00232:LOC114278164 K16818:LOC114268993 K10525:LOC114307969 K01723:LOC114284385,16567ea8-18ff-4b9d-9be0-d3d443831db3 K10526:LOC114315234 K00454:LOC114306071,LOC114297089,LOC114301806,LOC114268573,LOC114268609,LOC114268614 K07513:LOC114311692,LOC114296765K00134:LOC114265293,LOC114312375,LOC114293203 K01006:LOC114268500,LOC114258102 K01803:LOC114290849 K00051:LOC114322741 K00029:LOC114296210,LOC114281724,LOC114288936 K01610:LOC114323464 K00615:LOC114256926 K00025:LOC114274248 K01602:LOC114258036 K00026:LOC114291262 K00028:LOC114300619K01006:LOC114268500,LOC114258102 K00051:LOC114322741 K00162:LOC114324001 K00128:LOC114288457 K00029:LOC114296210,LOC114281724,LOC114288936 K01610:LOC114323464 K00025:LOC114274248 K00873:LOC114279530,LOC114303494 K00026:LOC114291262 K00626:LOC114287927,LOC114271198 K00028:LOC114300619K00006:LOC114319093 K06130:LOC114258076,LOC114306377 K01115:LOC114282235 K15728:LOC114258297 K13508:LOC114297081 K16818:LOC114268993 K14156:LOC114305617 K00901:LOC114306457,LOC114310374,LOC114319787,LOC114319789,LOC114307491 K14674:LOC114288695 K13510:LOC114276796,LOC114295251 K00111:LOC114267008K00134:LOC114265293,LOC114312375,LOC114293203 K01835:LOC114275532 K00162:LOC114324001 K01803:LOC114290849 K18857:LOC114289115,LOC114294197,LOC114295536,LOC114294194,LOC114295484,LOC114295535,LOC114303265 K00128:LOC114288457 K01568:LOC114290152 K01610:LOC114323464 K01810:LOC114298900 K00873:LOC114279530,LOC114303494K06670:LOC114301225 K05868:LOC114322964,LOC114263101,LOC114281071 K02213:LOC114323874,LOC114257720,LOC114266712 K06632:LOC114303675 K03351:LOC114319643 K03347:LOC114258709,LOC114270403,LOC114297677 K02206:LOC114257899,LOC114310342 K12456:LOC114311559 K02607:LOC114283133 K06630:LOC114321301 |
| Carbon fixation in photosynthetic organisms | KEGG PATHWAY | ko00710 | 11 | 36  | 8.250751 | 4.09E-08 | 1        |                                                                                                                                                                                                                                                                                                                                                                                                                                                                                                                                                                                                                                                                                                                                                                                                                                                                                                                                                                                                                                                                                                                                                                                                                                                                                                                                                                                                                                                                                                                                                                                                                                                                                                                                                                                                                                                                                                                                                                                       |
| Pyruvate metabolism                         | KEGG PATHWAY | ko00620 | 11 | 96  | 3.094032 | 0.000816 | 1        |                                                                                                                                                                                                                                                                                                                                                                                                                                                                                                                                                                                                                                                                                                                                                                                                                                                                                                                                                                                                                                                                                                                                                                                                                                                                                                                                                                                                                                                                                                                                                                                                                                                                                                                                                                                                                                                                                                                                                                                       |
| Glycerophospholipid metabolism              | KEGG PATHWAY | ko00564 | 11 | 109 | 2.725019 | 0.002315 | 1        |                                                                                                                                                                                                                                                                                                                                                                                                                                                                                                                                                                                                                                                                                                                                                                                                                                                                                                                                                                                                                                                                                                                                                                                                                                                                                                                                                                                                                                                                                                                                                                                                                                                                                                                                                                                                                                                                                                                                                                                       |
| Glycolysis / Gluconeogenesis                | KEGG PATHWAY | ko00010 | 10 | 99  | 2.727521 | 0.003584 | 1        |                                                                                                                                                                                                                                                                                                                                                                                                                                                                                                                                                                                                                                                                                                                                                                                                                                                                                                                                                                                                                                                                                                                                                                                                                                                                                                                                                                                                                                                                                                                                                                                                                                                                                                                                                                                                                                                                                                                                                                                       |
| Cell cycle                                  | KEGG PATHWAY | ko04110 | 10 | 107 | 2.523594 | 0.006231 | 0.834662 |                                                                                                                                                                                                                                                                                                                                                                                                                                                                                                                                                                                                                                                                                                                                                                                                                                                                                                                                                                                                                                                                                                                                                                                                                                                                                                                                                                                                                                                                                                                                                                                                                                                                                                                                                                                                                                                                                                                                                                                       |

|                                            |                 |         |    |     |          |          |          |                                                                                                                                                                                                                                                                                                                                                                                                                                                                                                                                                                                                                                                                                           |
|--------------------------------------------|-----------------|---------|----|-----|----------|----------|----------|-------------------------------------------------------------------------------------------------------------------------------------------------------------------------------------------------------------------------------------------------------------------------------------------------------------------------------------------------------------------------------------------------------------------------------------------------------------------------------------------------------------------------------------------------------------------------------------------------------------------------------------------------------------------------------------------|
| RNA transport                              | KEGG<br>PATHWAY | ko03013 | 10 | 138 | 1.9567   | 0.032234 | 1        | K14314:LOC114295603 K14305:LOC114265702 K14301:LOC114301439 K07936:LOC114288302 K12812:LOC114284487 K03260:LOC114315872 K14309:LOC114318068 K03262:LOC114267455 K14295:LOC114304544 K13126:LOC114306940,LOC114258291                                                                                                                                                                                                                                                                                                                                                                                                                                                                      |
| Valine, leucine and isoleucine degradation | KEGG<br>PATHWAY | ko00280 | 9  | 69  | 3.52206  | 0.000948 | 1        | K07513:LOC114311692,LOC114296765 K05607:LOC114274138 K00166:LOC114285556,LOC114269315 K0128:LOC114288457 K00827:LOC114272618,LOC114278956,LOC114281666 K00826:LOC114261622 K01640:LOC114321188,LOC114282580 K01641:LOC114266569 K00626:LOC114287927,LOC114271198<br>K00679:LOC114276665,LOC114291097,d5684c0d-cc5b-4971-af85-8e9d162d0c3e K09480:LOC114271632 K07407:LOC114311280 K00864:LOC114264896 K15728:LOC114258297 K13508:LOC114297081 K00901:LOC114306457,LOC114310374,LOC114319787,LOC114319789,LOC114307491 K14674:LOC114288695 K00128:LOC114288457                                                                                                                             |
| Glycerolipid metabolism                    | KEGG<br>PATHWAY | ko00561 | 9  | 77  | 3.156131 | 0.002082 | 1        | K14442:LOC114299725,LOC114271986,LOC114272935 K07573:LOC114297661 K12602:LOC114323627 K12604:LOC114256935 K12616:LOC114288758 K12581:LOC114287602 K03681:LOC114268981 K04077:LOC114307220 K13126:LOC114306940,LOC114258291<br>K13065:LOC114269230,LOC114282251,LOC114300059,LOC114301942,723d88a3-43a5-40d8-a514-ba43e7340fcb K01188:LOC114299631,LOC114308775,LOC114308776,LOC114262994,LOC114286568,LOC114260881 K00083:LOC114319730,LOC114320204,LOC114320821,LOC114274262,LOC114320817 K01904:LOC114311490 K05349:LOC114257730 K00588:LOC114265165 K00430:LOC114305603,LOC114315272,LOC114318212,LOC114319657,LOC114322843,LOC114271792,LOC114272408,LOC114297627 K09753:LOC114284668 |
| Phenylpropanoid biosynthesis               | KEGG<br>PATHWAY | ko00940 | 8  | 33  | 6.54605  | 2.03E-05 | 1        | K12153:LOC114314197,LOC114272270,LOC114298652 K01687:LOC114270240 K00811:LOC114278611 K00826:LOC114261622 K01653:LOC114308780 K01703:LOC114312831 K01647:LOC114272994,LOC114304692 K11820:LOC114277696,LOC114277682<br>K01079:LOC114262904 K00276:LOC114307723,LOC114272241,LOC114294351,LOC114294345 K15919:LOC114314980,LOC114314982,LOC114270024,1fa930de-db9f-416e-9354-3f9eebe0e865 K01696:LOC114257089,LOC114268516 K00600:LOC114274060 K00827:LOC114272618,LOC114278956,LOC114281666 K01733:LOC114270957 K00872:LOC114264777                                                                                                                                                       |
| 2-Oxocarboxylic acid metabolism            | KEGG<br>PATHWAY | ko01210 | 8  | 76  | 2.842364 | 0.006899 | 0.035547 |                                                                                                                                                                                                                                                                                                                                                                                                                                                                                                                                                                                                                                                                                           |
| Glycine, serine and threonine metabolism   | KEGG<br>PATHWAY | ko00260 | 8  | 94  | 2.298081 | 0.023017 | 0.130559 |                                                                                                                                                                                                                                                                                                                                                                                                                                                                                                                                                                                                                                                                                           |

|                                         |              |         |   |    |          |          |          |                                                                                                                                                                                                                                                                  |
|-----------------------------------------|--------------|---------|---|----|----------|----------|----------|------------------------------------------------------------------------------------------------------------------------------------------------------------------------------------------------------------------------------------------------------------------|
| Glyoxylate and dicarboxylate metabolism | KEGG PATHWAY | ko00630 | 8 | 95 | 2.273891 | 0.024354 | 1        | K15919:LOC114314980,LOC114314982,LOC114270024,1fa930de-db9f-416e-9354-3f9eebe0e865 K18121:LOC114301920 K00626:LOC114287927,LOC114271198 K00600:LOC114274060 K01602:LOC114258036 K00025:LOC114274248 K00026:LOC114291262 K01647:LOC114272994,LOC114304692         |
| Proteasome                              | KEGG PATHWAY | ko03050 | 7 | 48 | 3.937858 | 0.001797 | 1        | K03064:LOC114270085 K06699:LOC114283701 K03032:LOC114321610 K03039:LOC114272623 K03035:LOC114299878 K02736:LOC114319179 K03031:LOC114281469                                                                                                                      |
| Terpenoid backbone biosynthesis         | KEGG PATHWAY | ko00900 | 7 | 53 | 3.566362 | 0.003211 | 1        | K12742:LOC114281498,LOC114295355,LOC114295343 K01662:LOC114275769,LOC114303809,LOC114304411,92b343f9-0bb1-485a-858e-ef045559bc8a K00938:LOC114289308 K13789:LOC114313499,LOC114276125 K01641:LOC114266569 K00021:LOC114314342 K00626:LOC114287927,LOC114271198   |
| mRNA surveillance pathway               | KEGG PATHWAY | ko03015 | 7 | 59 | 3.203681 | 0.005881 | 0.024068 | K06100:LOC114273442 K14376:LOC114279110,LOC114315352 K13917:LOC114318320,LOC114316576 K12812:LOC114284487 K11583:LOC114271751,LOC114308031,LOC114299429 K14396:LOC114256818 K13126:LOC114306940,LOC114258291                                                     |
| Aminoacyl-tRNA biosynthesis             | KEGG PATHWAY | ko00970 | 7 | 63 | 3.000273 | 0.008411 | 0.406428 | K04567:LOC114266854 K02435:LOC114313690 K01872:LOC114259588,LOC114312141,LOC114313307,LOC114314985,LOC114302657 K01874:LOC114263165 K01886:LOC114289917 K01887:LOC114319407,LOC114284754,LOC114317669,LOC114276329,LOC114277671,LOC114296057 K01868:LOC114256190 |
| Oocyte meiosis                          | KEGG PATHWAY | ko04114 | 7 | 76 | 2.487068 | 0.022136 | 0.28711  | K04368:LOC114322094 K03351:LOC114319643 K03347:LOC114258709,LOC114270403,LOC114297677 K02206:LOC114257899,LOC114310342 K12456:LOC114311559 K06630:LOC114321301 K02183:LOC114314441                                                                               |
| Ribosome biogenesis in eukaryotes       | KEGG PATHWAY | ko03008 | 7 | 82 | 2.305088 | 0.031952 | 1        | K14571:LOC114298692,LOC114269391,LOC114269394,LOC114298687 K18532:LOC114269644 K14568:LOC114314251 K11883:LOC114306153 K14569:LOC114285688 K11129:LOC114276868 K07936:LOC114288302                                                                               |
| Phosphatidylinositol signaling system   | KEGG PATHWAY | ko04070 | 6 | 53 | 3.056882 | 0.013126 | 0.198119 | K01106:LOC114317984 K05857:LOC114322371,LOC114283403 K00913:LOC114299547 K00901:LOC114306457,LOC114310374,LOC114319787,LOC114319789,LOC114307491 K02183:LOC114314441 K00888:LOC114280383                                                                         |
| Citrate cycle (TCA cycle)               | KEGG PATHWAY | ko00020 | 6 | 58 | 2.793358 | 0.019851 | 1        | K00162:LOC114324001 K01648:LOC114273286,LOC114261649 K01610:LOC114323464 K00025:LOC114274248 K00026:LOC114291262 K01647:LOC114272994,LOC114304692                                                                                                                |

|                                                      |                 |         |   |    |          |          |          |                                                                                                                                                                                                                                                      |
|------------------------------------------------------|-----------------|---------|---|----|----------|----------|----------|------------------------------------------------------------------------------------------------------------------------------------------------------------------------------------------------------------------------------------------------------|
| Alanine,<br>aspartate and<br>glutamate<br>metabolism | KEGG<br>PATHWAY | ko00250 | 6 | 67 | 2.41813  | 0.037201 | 1        | K00261:LOC114319915 K13566:LOC114257299 K00278:LOC114277264 K00811:LOC114278611 K00827:LO<br>C114272618,LOC114278956,LOC114281666 K00764:LOC114307059                                                                                                |
| Tyrosine<br>metabolism                               | KEGG<br>PATHWAY | ko00350 | 6 | 69 | 2.34804  | 0.042057 | 0.415398 | K00276:LOC114307723,LOC114272241,LOC114294351,LOC114294345 K15849:LOC114264149 K18857:LO<br>C114289115,LOC114294197,LOC114295536,LOC114294194,LOC114295484,LOC114295535,LOC114303265<br> K00811:LOC114278611 K01555:LOC114278049 K00422:LOC114323507 |
| Fatty acid<br>metabolism                             | KEGG<br>PATHWAY | ko01212 | 6 | 70 | 2.314496 | 0.044628 | 1        | K10781:LOC114264136,7df55266-787a-4fce-8487-<br>e70494f053b8 K00232:LOC114278164 K07513:LOC114311692,LOC114296765 K00626:LOC114287927,LOC<br>114271198 K10251:LOC114314741,LOC114298494,LOC114314740 K09458:LOC114287203                             |
| Cutin, suberine<br>and wax<br>biosynthesis           | KEGG<br>PATHWAY | ko00073 | 5 | 12 | 11.25102 | 4.34E-05 | 1        | K13407:LOC114271897,LOC114272873 K15401:LOC114323827 K15400:LOC114319705,LOC114285233,LO<br>C114304718 K15403:LOC114319519 K15402:LOC114294575                                                                                                       |
| Protein export                                       | KEGG<br>PATHWAY | ko03060 | 5 | 39 | 3.461853 | 0.01388  | 1        | K03107:LOC114287583 K03217:LOC114278137 K12948:LOC114290455 K03109:LOC114321491 K07342:LO<br>C114320891                                                                                                                                              |
| Fatty acid<br>degradation                            | KEGG<br>PATHWAY | ko00071 | 5 | 53 | 2.547402 | 0.045606 | 1        | K00128:LOC114288457 K00232:LOC114278164 K07513:LOC114311692,LOC114296765 K00626:LOC11428<br>7927,LOC114271198 K18857:LOC114289115,LOC114294197,LOC114295536,LOC114294194,LOC11429548<br>4,LOC114295535,LOC114303265                                  |
| Valine, leucine<br>and isoleucine<br>biosynthesis    | KEGG<br>PATHWAY | ko00290 | 4 | 17 | 6.353519 | 0.003005 | 0.883748 | K01687:LOC114270240 K01653:LOC114308780 K00826:LOC114261622 K01703:LOC114312831                                                                                                                                                                      |
| Cyanoamino acid<br>metabolism                        | KEGG<br>PATHWAY | ko00460 | 4 | 32 | 3.375307 | 0.029382 | 0.675723 | K01188:LOC114299631,LOC114308775,LOC114308776,LOC114262994,LOC114286568,LOC114260881 K05<br>349:LOC114257730 K12153:LOC114314197,LOC114272270,LOC114298652 K00600:LOC114274060                                                                       |
| Pantothenate and<br>CoA<br>biosynthesis              | KEGG<br>PATHWAY | ko00770 | 4 | 36 | 3.000273 | 0.042923 | 1        | K01922:LOC114260205 K01653:LOC114308780 K00826:LOC114261622 K01687:LOC114270240                                                                                                                                                                      |

|                                            |              |         |   |    |          |          |          |                                                                                             |
|--------------------------------------------|--------------|---------|---|----|----------|----------|----------|---------------------------------------------------------------------------------------------|
| Synthesis and degradation of ketone bodies | KEGG PATHWAY | ko00072 | 3 | 8  | 10.12592 | 0.002457 | 1        | K01640:LOC114321188,LOC114282580 K01641:LOC114266569 K00626:LOC114287927,LOC114271198       |
| Collecting duct acid secretion             | KEGG PATHWAY | ko04966 | 3 | 17 | 4.765139 | 0.023295 | 2.14E-08 | K02148:LOC114290767,LOC114302706 K02155:LOC114314998 K02154:LOC114268841                    |
| Zeatin biosynthesis                        | KEGG PATHWAY | ko00908 | 2 | 8  | 6.750614 | 0.033037 | 0.035547 | K13495:LOC114322307,LOC114322295,LOC114299751 K00279:LOC114256695,LOC114292569,LOC114295033 |

**Table S5: Differentially expressed genes in plant hormone signal transduction pathway**

| Geneid       | logFC    | KEGG_Orthology | Pathway_ID | Orthology | Pathway                           | KEGG_Orthology_Web                                                                                                  | Pathway_Web                                                                                                       |
|--------------|----------|----------------|------------|-----------|-----------------------------------|---------------------------------------------------------------------------------------------------------------------|-------------------------------------------------------------------------------------------------------------------|
| LOC114275120 | 8.56008  | K13464         | ko04075    | JAZ       | Plant hormone signal transduction | <a href="https://www.genome.jp/dbget-bin/www_bget?ko:K13464">https://www.genome.jp/dbget-bin/www_bget?ko:K13464</a> | <a href="https://www.kegg.jp/kegg-bin/show_pathway?ko04075">https://www.kegg.jp/kegg-bin/show_pathway?ko04075</a> |
| LOC114306732 | 5.723127 | K13416         | ko04075    | BAK1      | Plant hormone signal transduction | <a href="https://www.genome.jp/dbget-bin/www_bget?ko:K13416">https://www.genome.jp/dbget-bin/www_bget?ko:K13416</a> | <a href="https://www.kegg.jp/kegg-bin/show_pathway?ko04075">https://www.kegg.jp/kegg-bin/show_pathway?ko04075</a> |
| LOC114283520 | 5.701988 | K13464         | ko04075    | JAZ       | Plant hormone signal transduction | <a href="https://www.genome.jp/dbget-bin/www_bget?ko:K13464">https://www.genome.jp/dbget-bin/www_bget?ko:K13464</a> | <a href="https://www.kegg.jp/kegg-bin/show_pathway?ko04075">https://www.kegg.jp/kegg-bin/show_pathway?ko04075</a> |
| LOC114275306 | 5.062557 | K13464         | ko04075    | JAZ       | Plant hormone signal transduction | <a href="https://www.genome.jp/dbget-bin/www_bget?ko:K13464">https://www.genome.jp/dbget-bin/www_bget?ko:K13464</a> | <a href="https://www.kegg.jp/kegg-bin/show_pathway?ko04075">https://www.kegg.jp/kegg-bin/show_pathway?ko04075</a> |
| LOC114275107 | 4.931732 | K13464         | ko04075    | JAZ       | Plant hormone signal transduction | <a href="https://www.genome.jp/dbget-bin/www_bget?ko:K13464">https://www.genome.jp/dbget-bin/www_bget?ko:K13464</a> | <a href="https://www.kegg.jp/kegg-bin/show_pathway?ko04075">https://www.kegg.jp/kegg-bin/show_pathway?ko04075</a> |
| LOC114295855 | 4.39054  | K14487         | ko04075    | GH3       | Plant hormone signal transduction | <a href="https://www.genome.jp/dbget-bin/www_bget?ko:K14487">https://www.genome.jp/dbget-bin/www_bget?ko:K14487</a> | <a href="https://www.kegg.jp/kegg-bin/show_pathway?ko04075">https://www.kegg.jp/kegg-bin/show_pathway?ko04075</a> |
| LOC114316026 | 4.249566 | K14487         | ko04075    | GH3       | Plant hormone signal transduction | <a href="https://www.genome.jp/dbget-bin/www_bget?ko:K14487">https://www.genome.jp/dbget-bin/www_bget?ko:K14487</a> | <a href="https://www.kegg.jp/kegg-bin/show_pathway?ko04075">https://www.kegg.jp/kegg-bin/show_pathway?ko04075</a> |
| LOC114289511 | 3.505667 | K13946         | ko04075    | AUX1, LAX | Plant hormone signal transduction | <a href="https://www.genome.jp/dbget-bin/www_bget?ko:K13946">https://www.genome.jp/dbget-bin/www_bget?ko:K13946</a> | <a href="https://www.kegg.jp/kegg-bin/show_pathway?ko04075">https://www.kegg.jp/kegg-bin/show_pathway?ko04075</a> |



|              |          |        |         |       |                                   |                                                                                                                     |                                                                                                                   |
|--------------|----------|--------|---------|-------|-----------------------------------|---------------------------------------------------------------------------------------------------------------------|-------------------------------------------------------------------------------------------------------------------|
| LOC114301909 | 3.355596 | K13449 | ko04075 | PR1   | Plant hormone signal transduction | <a href="https://www.genome.jp/dbget-bin/www_bget?ko:K13449">https://www.genome.jp/dbget-bin/www_bget?ko:K13449</a> | <a href="https://www.kegg.jp/kegg-bin/show_pathway?ko04075">https://www.kegg.jp/kegg-bin/show_pathway?ko04075</a> |
| LOC114277806 | 3.263819 | K13422 | ko04075 | MYC2  | Plant hormone signal transduction | <a href="https://www.genome.jp/dbget-bin/www_bget?ko:K13422">https://www.genome.jp/dbget-bin/www_bget?ko:K13422</a> | <a href="https://www.kegg.jp/kegg-bin/show_pathway?ko04075">https://www.kegg.jp/kegg-bin/show_pathway?ko04075</a> |
| LOC114319171 | 3.110549 | K13464 | ko04075 | JAZ   | Plant hormone signal transduction | <a href="https://www.genome.jp/dbget-bin/www_bget?ko:K13464">https://www.genome.jp/dbget-bin/www_bget?ko:K13464</a> | <a href="https://www.kegg.jp/kegg-bin/show_pathway?ko04075">https://www.kegg.jp/kegg-bin/show_pathway?ko04075</a> |
| LOC114278610 | 2.882361 | K14505 | ko04075 | CYCD3 | Plant hormone signal transduction | <a href="https://www.genome.jp/dbget-bin/www_bget?ko:K14505">https://www.genome.jp/dbget-bin/www_bget?ko:K14505</a> | <a href="https://www.kegg.jp/kegg-bin/show_pathway?ko04075">https://www.kegg.jp/kegg-bin/show_pathway?ko04075</a> |
| LOC114266873 | 2.853596 | K12126 | ko04075 | PIF3  | Plant hormone signal transduction | <a href="https://www.genome.jp/dbget-bin/www_bget?ko:K12126">https://www.genome.jp/dbget-bin/www_bget?ko:K12126</a> | <a href="https://www.kegg.jp/kegg-bin/show_pathway?ko04075">https://www.kegg.jp/kegg-bin/show_pathway?ko04075</a> |
| LOC114277384 | 2.834297 | K14516 | ko04075 | ERF1  | Plant hormone signal transduction | <a href="https://www.genome.jp/dbget-bin/www_bget?ko:K14516">https://www.genome.jp/dbget-bin/www_bget?ko:K14516</a> | <a href="https://www.kegg.jp/kegg-bin/show_pathway?ko04075">https://www.kegg.jp/kegg-bin/show_pathway?ko04075</a> |
| LOC114264369 | 2.598182 | K14488 | ko04075 | SAUR  | Plant hormone signal transduction | <a href="https://www.genome.jp/dbget-bin/www_bget?ko:K14488">https://www.genome.jp/dbget-bin/www_bget?ko:K14488</a> | <a href="https://www.kegg.jp/kegg-bin/show_pathway?ko04075">https://www.kegg.jp/kegg-bin/show_pathway?ko04075</a> |
| LOC114266177 | 2.328514 | K13422 | ko04075 | MYC2  | Plant hormone signal transduction | <a href="https://www.genome.jp/dbget-bin/www_bget?ko:K13422">https://www.genome.jp/dbget-bin/www_bget?ko:K13422</a> | <a href="https://www.kegg.jp/kegg-bin/show_pathway?ko04075">https://www.kegg.jp/kegg-bin/show_pathway?ko04075</a> |
| LOC114258858 | 2.243562 | K13449 | ko04075 | PR1   | Plant hormone signal transduction | <a href="https://www.genome.jp/dbget-bin/www_bget?ko:K13449">https://www.genome.jp/dbget-bin/www_bget?ko:K13449</a> | <a href="https://www.kegg.jp/kegg-bin/show_pathway?ko04075">https://www.kegg.jp/kegg-bin/show_pathway?ko04075</a> |
| LOC114324111 | 2.167538 | K14488 | ko04075 | SAUR  | Plant hormone signal transduction | <a href="https://www.genome.jp/dbget-bin/www_bget?ko:K14488">https://www.genome.jp/dbget-bin/www_bget?ko:K14488</a> | <a href="https://www.kegg.jp/kegg-bin/show_pathway?ko04075">https://www.kegg.jp/kegg-bin/show_pathway?ko04075</a> |
| LOC114278388 | 1.840358 | K14484 | ko04075 | IAA   | Plant hormone signal transduction | <a href="https://www.genome.jp/dbget-bin/www_bget?ko:K14484">https://www.genome.jp/dbget-bin/www_bget?ko:K14484</a> | <a href="https://www.kegg.jp/kegg-bin/show_pathway?ko04075">https://www.kegg.jp/kegg-bin/show_pathway?ko04075</a> |
| LOC114276957 | 1.741056 | K14488 | ko04075 | SAUR  | Plant hormone signal transduction | <a href="https://www.genome.jp/dbget-bin/www_bget?ko:K14488">https://www.genome.jp/dbget-bin/www_bget?ko:K14488</a> | <a href="https://www.kegg.jp/kegg-bin/show_pathway?ko04075">https://www.kegg.jp/kegg-bin/show_pathway?ko04075</a> |
| LOC114256256 | 1.652046 | K13449 | ko04075 | PR1   | Plant hormone signal transduction | <a href="https://www.genome.jp/dbget-bin/www_bget?ko:K13449">https://www.genome.jp/dbget-bin/www_bget?ko:K13449</a> | <a href="https://www.kegg.jp/kegg-bin/show_pathway?ko04075">https://www.kegg.jp/kegg-bin/show_pathway?ko04075</a> |

|              |          |        |         |           |                                   |                                                                                                                     |                                                                                                                   |
|--------------|----------|--------|---------|-----------|-----------------------------------|---------------------------------------------------------------------------------------------------------------------|-------------------------------------------------------------------------------------------------------------------|
| LOC114266457 | 1.529484 | K13422 | ko04075 | MYC2      | Plant hormone signal transduction | <a href="https://www.genome.jp/dbget-bin/www_bget?ko:K13422">https://www.genome.jp/dbget-bin/www_bget?ko:K13422</a> | <a href="https://www.kegg.jp/kegg-bin/show_pathway?ko04075">https://www.kegg.jp/kegg-bin/show_pathway?ko04075</a> |
| LOC114302248 | 1.420034 | K13449 | ko04075 | PR1       | Plant hormone signal transduction | <a href="https://www.genome.jp/dbget-bin/www_bget?ko:K13449">https://www.genome.jp/dbget-bin/www_bget?ko:K13449</a> | <a href="https://www.kegg.jp/kegg-bin/show_pathway?ko04075">https://www.kegg.jp/kegg-bin/show_pathway?ko04075</a> |
| LOC114293599 | 1.400265 | K14488 | ko04075 | SAUR      | Plant hormone signal transduction | <a href="https://www.genome.jp/dbget-bin/www_bget?ko:K14488">https://www.genome.jp/dbget-bin/www_bget?ko:K14488</a> | <a href="https://www.kegg.jp/kegg-bin/show_pathway?ko04075">https://www.kegg.jp/kegg-bin/show_pathway?ko04075</a> |
| LOC114297314 | 1.387237 | K14500 | ko04075 | BSK       | Plant hormone signal transduction | <a href="https://www.genome.jp/dbget-bin/www_bget?ko:K14500">https://www.genome.jp/dbget-bin/www_bget?ko:K14500</a> | <a href="https://www.kegg.jp/kegg-bin/show_pathway?ko04075">https://www.kegg.jp/kegg-bin/show_pathway?ko04075</a> |
| LOC114260196 | 1.382652 | K14516 | ko04075 | ERF1      | Plant hormone signal transduction | <a href="https://www.genome.jp/dbget-bin/www_bget?ko:K14516">https://www.genome.jp/dbget-bin/www_bget?ko:K14516</a> | <a href="https://www.kegg.jp/kegg-bin/show_pathway?ko04075">https://www.kegg.jp/kegg-bin/show_pathway?ko04075</a> |
| LOC114259204 | 1.309536 | K14488 | ko04075 | SAUR      | Plant hormone signal transduction | <a href="https://www.genome.jp/dbget-bin/www_bget?ko:K14488">https://www.genome.jp/dbget-bin/www_bget?ko:K14488</a> | <a href="https://www.kegg.jp/kegg-bin/show_pathway?ko04075">https://www.kegg.jp/kegg-bin/show_pathway?ko04075</a> |
| LOC114274147 | 1.170668 | K14497 | ko04075 | PP2C      | Plant hormone signal transduction | <a href="https://www.genome.jp/dbget-bin/www_bget?ko:K14497">https://www.genome.jp/dbget-bin/www_bget?ko:K14497</a> | <a href="https://www.kegg.jp/kegg-bin/show_pathway?ko04075">https://www.kegg.jp/kegg-bin/show_pathway?ko04075</a> |
| LOC114279578 | 1.16834  | K13946 | ko04075 | AUX1, LAX | Plant hormone signal transduction | <a href="https://www.genome.jp/dbget-bin/www_bget?ko:K13946">https://www.genome.jp/dbget-bin/www_bget?ko:K13946</a> | <a href="https://www.kegg.jp/kegg-bin/show_pathway?ko04075">https://www.kegg.jp/kegg-bin/show_pathway?ko04075</a> |
| LOC114279112 | 1.157483 | K14504 | ko04075 | TCH4      | Plant hormone signal transduction | <a href="https://www.genome.jp/dbget-bin/www_bget?ko:K14504">https://www.genome.jp/dbget-bin/www_bget?ko:K14504</a> | <a href="https://www.kegg.jp/kegg-bin/show_pathway?ko04075">https://www.kegg.jp/kegg-bin/show_pathway?ko04075</a> |
| LOC114273443 | 1.1163   | K14431 | ko04075 | TGA       | Plant hormone signal transduction | <a href="https://www.genome.jp/dbget-bin/www_bget?ko:K14431">https://www.genome.jp/dbget-bin/www_bget?ko:K14431</a> | <a href="https://www.kegg.jp/kegg-bin/show_pathway?ko04075">https://www.kegg.jp/kegg-bin/show_pathway?ko04075</a> |
| LOC114317541 | 1.109925 | K13464 | ko04075 | JAZ       | Plant hormone signal transduction | <a href="https://www.genome.jp/dbget-bin/www_bget?ko:K13464">https://www.genome.jp/dbget-bin/www_bget?ko:K13464</a> | <a href="https://www.kegg.jp/kegg-bin/show_pathway?ko04075">https://www.kegg.jp/kegg-bin/show_pathway?ko04075</a> |
| LOC114284698 | 1.079462 | K13464 | ko04075 | JAZ       | Plant hormone signal transduction | <a href="https://www.genome.jp/dbget-bin/www_bget?ko:K13464">https://www.genome.jp/dbget-bin/www_bget?ko:K13464</a> | <a href="https://www.kegg.jp/kegg-bin/show_pathway?ko04075">https://www.kegg.jp/kegg-bin/show_pathway?ko04075</a> |
| LOC114303850 | 1.035878 | K14489 | ko04075 | AHK2_3_4  | Plant hormone signal transduction | <a href="https://www.genome.jp/dbget-bin/www_bget?ko:K14489">https://www.genome.jp/dbget-bin/www_bget?ko:K14489</a> | <a href="https://www.kegg.jp/kegg-bin/show_pathway?ko04075">https://www.kegg.jp/kegg-bin/show_pathway?ko04075</a> |

|              |          |        |         |          |                                   |                                                                                                                     |                                                                                                                   |
|--------------|----------|--------|---------|----------|-----------------------------------|---------------------------------------------------------------------------------------------------------------------|-------------------------------------------------------------------------------------------------------------------|
| LOC114279611 | 1.008161 | K14497 | ko04075 | PP2C     | Plant hormone signal transduction | <a href="https://www.genome.jp/dbget-bin/www_bget?ko:K14497">https://www.genome.jp/dbget-bin/www_bget?ko:K14497</a> | <a href="https://www.kegg.jp/kegg-bin/show_pathway?ko04075">https://www.kegg.jp/kegg-bin/show_pathway?ko04075</a> |
| LOC114322511 | -1.11253 | K14432 | ko04075 | ABF      | Plant hormone signal transduction | <a href="https://www.genome.jp/dbget-bin/www_bget?ko:K14432">https://www.genome.jp/dbget-bin/www_bget?ko:K14432</a> | <a href="https://www.kegg.jp/kegg-bin/show_pathway?ko04075">https://www.kegg.jp/kegg-bin/show_pathway?ko04075</a> |
| LOC114301147 | -1.22601 | K14432 | ko04075 | ABF      | Plant hormone signal transduction | <a href="https://www.genome.jp/dbget-bin/www_bget?ko:K14432">https://www.genome.jp/dbget-bin/www_bget?ko:K14432</a> | <a href="https://www.kegg.jp/kegg-bin/show_pathway?ko04075">https://www.kegg.jp/kegg-bin/show_pathway?ko04075</a> |
| LOC114266460 | -1.37406 | K14488 | ko04075 | SAUR     | Plant hormone signal transduction | <a href="https://www.genome.jp/dbget-bin/www_bget?ko:K14488">https://www.genome.jp/dbget-bin/www_bget?ko:K14488</a> | <a href="https://www.kegg.jp/kegg-bin/show_pathway?ko04075">https://www.kegg.jp/kegg-bin/show_pathway?ko04075</a> |
| LOC114300415 | -1.39405 | K14496 | ko04075 | PYL      | Plant hormone signal transduction | <a href="https://www.genome.jp/dbget-bin/www_bget?ko:K14496">https://www.genome.jp/dbget-bin/www_bget?ko:K14496</a> | <a href="https://www.kegg.jp/kegg-bin/show_pathway?ko04075">https://www.kegg.jp/kegg-bin/show_pathway?ko04075</a> |
| LOC114307146 | -1.41649 | K14432 | ko04075 | ABF      | Plant hormone signal transduction | <a href="https://www.genome.jp/dbget-bin/www_bget?ko:K14432">https://www.genome.jp/dbget-bin/www_bget?ko:K14432</a> | <a href="https://www.kegg.jp/kegg-bin/show_pathway?ko04075">https://www.kegg.jp/kegg-bin/show_pathway?ko04075</a> |
| LOC114316945 | -1.43667 | K14489 | ko04075 | AHK2_3_4 | Plant hormone signal transduction | <a href="https://www.genome.jp/dbget-bin/www_bget?ko:K14489">https://www.genome.jp/dbget-bin/www_bget?ko:K14489</a> | <a href="https://www.kegg.jp/kegg-bin/show_pathway?ko04075">https://www.kegg.jp/kegg-bin/show_pathway?ko04075</a> |
| LOC114276512 | -1.6107  | K14484 | ko04075 | IAA      | Plant hormone signal transduction | <a href="https://www.genome.jp/dbget-bin/www_bget?ko:K14484">https://www.genome.jp/dbget-bin/www_bget?ko:K14484</a> | <a href="https://www.kegg.jp/kegg-bin/show_pathway?ko04075">https://www.kegg.jp/kegg-bin/show_pathway?ko04075</a> |
| LOC114277121 | -1.62715 | K14484 | ko04075 | IAA      | Plant hormone signal transduction | <a href="https://www.genome.jp/dbget-bin/www_bget?ko:K14484">https://www.genome.jp/dbget-bin/www_bget?ko:K14484</a> | <a href="https://www.kegg.jp/kegg-bin/show_pathway?ko04075">https://www.kegg.jp/kegg-bin/show_pathway?ko04075</a> |
| LOC114307248 | -2.08454 | K13449 | ko04075 | PR1      | Plant hormone signal transduction | <a href="https://www.genome.jp/dbget-bin/www_bget?ko:K13449">https://www.genome.jp/dbget-bin/www_bget?ko:K13449</a> | <a href="https://www.kegg.jp/kegg-bin/show_pathway?ko04075">https://www.kegg.jp/kegg-bin/show_pathway?ko04075</a> |
| LOC114269318 | -3.13001 | K14491 | ko04075 | ARR-B    | Plant hormone signal transduction | <a href="https://www.genome.jp/dbget-bin/www_bget?ko:K14491">https://www.genome.jp/dbget-bin/www_bget?ko:K14491</a> | <a href="https://www.kegg.jp/kegg-bin/show_pathway?ko04075">https://www.kegg.jp/kegg-bin/show_pathway?ko04075</a> |
| LOC114271432 | -3.70481 | K13449 | ko04075 | PR1      | Plant hormone signal transduction | <a href="https://www.genome.jp/dbget-bin/www_bget?ko:K13449">https://www.genome.jp/dbget-bin/www_bget?ko:K13449</a> | <a href="https://www.kegg.jp/kegg-bin/show_pathway?ko04075">https://www.kegg.jp/kegg-bin/show_pathway?ko04075</a> |
| LOC114258874 | -4.77865 | K13449 | ko04075 | PR1      | Plant hormone signal transduction | <a href="https://www.genome.jp/dbget-bin/www_bget?ko:K13449">https://www.genome.jp/dbget-bin/www_bget?ko:K13449</a> | <a href="https://www.kegg.jp/kegg-bin/show_pathway?ko04075">https://www.kegg.jp/kegg-bin/show_pathway?ko04075</a> |

|              |          |        |         |      |                                   |                                                                                                                     |                                                                                                                   |
|--------------|----------|--------|---------|------|-----------------------------------|---------------------------------------------------------------------------------------------------------------------|-------------------------------------------------------------------------------------------------------------------|
| LOC114290140 | -8.06801 | K14497 | ko04075 | PP2C | Plant hormone signal transduction | <a href="https://www.genome.jp/dbget-bin/www_bget?ko:K14497">https://www.genome.jp/dbget-bin/www_bget?ko:K14497</a> | <a href="https://www.kegg.jp/kegg-bin/show_pathway?ko04075">https://www.kegg.jp/kegg-bin/show_pathway?ko04075</a> |
|--------------|----------|--------|---------|------|-----------------------------------|---------------------------------------------------------------------------------------------------------------------|-------------------------------------------------------------------------------------------------------------------|

**Table S6: Differentially expressed genes in alpha-Linolenic acid metabolism pathway**

| Geneid       | logFC    | KEGG_Orthology | Pathway_ID | Orthology              | Pathway                         | KEGG_Orthology_Web                                                                                                  | Pathway_Web                                                                                                       |
|--------------|----------|----------------|------------|------------------------|---------------------------------|---------------------------------------------------------------------------------------------------------------------|-------------------------------------------------------------------------------------------------------------------|
| LOC114268993 | 5.830466 | K16818         | ko00592    | DAD1                   | alpha-Linolenic acid metabolism | <a href="https://www.genome.jp/dbget-bin/www_bget?ko:K16818">https://www.genome.jp/dbget-bin/www_bget?ko:K16818</a> | <a href="https://www.kegg.jp/kegg-bin/show_pathway?ko00592">https://www.kegg.jp/kegg-bin/show_pathway?ko00592</a> |
| LOC114311692 | 4.142333 | K07513         | ko00592    | ACAA1                  | alpha-Linolenic acid metabolism | <a href="https://www.genome.jp/dbget-bin/www_bget?ko:K07513">https://www.genome.jp/dbget-bin/www_bget?ko:K07513</a> | <a href="https://www.kegg.jp/kegg-bin/show_pathway?ko00592">https://www.kegg.jp/kegg-bin/show_pathway?ko00592</a> |
| LOC114289115 | 3.593207 | K18857         | ko00592    | ADH1                   | alpha-Linolenic acid metabolism | <a href="https://www.genome.jp/dbget-bin/www_bget?ko:K18857">https://www.genome.jp/dbget-bin/www_bget?ko:K18857</a> | <a href="https://www.kegg.jp/kegg-bin/show_pathway?ko00592">https://www.kegg.jp/kegg-bin/show_pathway?ko00592</a> |
| LOC114303265 | 3.259537 | K18857         | ko00592    | ADH1                   | alpha-Linolenic acid metabolism | <a href="https://www.genome.jp/dbget-bin/www_bget?ko:K18857">https://www.genome.jp/dbget-bin/www_bget?ko:K18857</a> | <a href="https://www.kegg.jp/kegg-bin/show_pathway?ko00592">https://www.kegg.jp/kegg-bin/show_pathway?ko00592</a> |
| LOC114306071 | 2.609358 | K00454         | ko00592    | LOX2S                  | alpha-Linolenic acid metabolism | <a href="https://www.genome.jp/dbget-bin/www_bget?ko:K00454">https://www.genome.jp/dbget-bin/www_bget?ko:K00454</a> | <a href="https://www.kegg.jp/kegg-bin/show_pathway?ko00592">https://www.kegg.jp/kegg-bin/show_pathway?ko00592</a> |
| LOC114307969 | 2.507439 | K10525         | ko00592    | AOC                    | alpha-Linolenic acid metabolism | <a href="https://www.genome.jp/dbget-bin/www_bget?ko:K10525">https://www.genome.jp/dbget-bin/www_bget?ko:K10525</a> | <a href="https://www.kegg.jp/kegg-bin/show_pathway?ko00592">https://www.kegg.jp/kegg-bin/show_pathway?ko00592</a> |
| LOC114295535 | 2.323325 | K18857         | ko00592    | ADH1                   | alpha-Linolenic acid metabolism | <a href="https://www.genome.jp/dbget-bin/www_bget?ko:K18857">https://www.genome.jp/dbget-bin/www_bget?ko:K18857</a> | <a href="https://www.kegg.jp/kegg-bin/show_pathway?ko00592">https://www.kegg.jp/kegg-bin/show_pathway?ko00592</a> |
| LOC114288630 | 1.862125 | K08241         | ko00592    | E2.1.1.141             | alpha-Linolenic acid metabolism | <a href="https://www.genome.jp/dbget-bin/www_bget?ko:K08241">https://www.genome.jp/dbget-bin/www_bget?ko:K08241</a> | <a href="https://www.kegg.jp/kegg-bin/show_pathway?ko00592">https://www.kegg.jp/kegg-bin/show_pathway?ko00592</a> |
| LOC114278164 | 1.832763 | K00232         | ko00592    | E1.3.3.6, ACOX1, ACOX3 | alpha-Linolenic acid metabolism | <a href="https://www.genome.jp/dbget-bin/www_bget?ko:K00232">https://www.genome.jp/dbget-bin/www_bget?ko:K00232</a> | <a href="https://www.kegg.jp/kegg-bin/show_pathway?ko00592">https://www.kegg.jp/kegg-bin/show_pathway?ko00592</a> |
| LOC114268614 | 1.744167 | K00454         | ko00592    | LOX2S                  | alpha-Linolenic acid metabolism | <a href="https://www.genome.jp/dbget-bin/www_bget?ko:K00454">https://www.genome.jp/dbget-bin/www_bget?ko:K00454</a> | <a href="https://www.kegg.jp/kegg-bin/show_pathway?ko00592">https://www.kegg.jp/kegg-bin/show_pathway?ko00592</a> |

|              |          |        |         |            |                                 |                                                                                                                     |                                                                                                                   |
|--------------|----------|--------|---------|------------|---------------------------------|---------------------------------------------------------------------------------------------------------------------|-------------------------------------------------------------------------------------------------------------------|
| LOC114294194 | 1.719761 | K18857 | ko00592 | ADH1       | alpha-Linolenic acid metabolism | <a href="https://www.genome.jp/dbget-bin/www_bget?ko:K18857">https://www.genome.jp/dbget-bin/www_bget?ko:K18857</a> | <a href="https://www.kegg.jp/kegg-bin/show_pathway?ko00592">https://www.kegg.jp/kegg-bin/show_pathway?ko00592</a> |
| LOC114294197 | 1.689836 | K18857 | ko00592 | ADH1       | alpha-Linolenic acid metabolism | <a href="https://www.genome.jp/dbget-bin/www_bget?ko:K18857">https://www.genome.jp/dbget-bin/www_bget?ko:K18857</a> | <a href="https://www.kegg.jp/kegg-bin/show_pathway?ko00592">https://www.kegg.jp/kegg-bin/show_pathway?ko00592</a> |
| LOC114301806 | 1.601199 | K00454 | ko00592 | LOX2S      | alpha-Linolenic acid metabolism | <a href="https://www.genome.jp/dbget-bin/www_bget?ko:K00454">https://www.genome.jp/dbget-bin/www_bget?ko:K00454</a> | <a href="https://www.kegg.jp/kegg-bin/show_pathway?ko00592">https://www.kegg.jp/kegg-bin/show_pathway?ko00592</a> |
| LOC114310687 | 1.597953 | K08241 | ko00592 | E2.1.1.141 | alpha-Linolenic acid metabolism | <a href="https://www.genome.jp/dbget-bin/www_bget?ko:K08241">https://www.genome.jp/dbget-bin/www_bget?ko:K08241</a> | <a href="https://www.kegg.jp/kegg-bin/show_pathway?ko00592">https://www.kegg.jp/kegg-bin/show_pathway?ko00592</a> |
| LOC114268573 | 1.574279 | K00454 | ko00592 | LOX2S      | alpha-Linolenic acid metabolism | <a href="https://www.genome.jp/dbget-bin/www_bget?ko:K00454">https://www.genome.jp/dbget-bin/www_bget?ko:K00454</a> | <a href="https://www.kegg.jp/kegg-bin/show_pathway?ko00592">https://www.kegg.jp/kegg-bin/show_pathway?ko00592</a> |
| LOC114268609 | 1.451754 | K00454 | ko00592 | LOX2S      | alpha-Linolenic acid metabolism | <a href="https://www.genome.jp/dbget-bin/www_bget?ko:K00454">https://www.genome.jp/dbget-bin/www_bget?ko:K00454</a> | <a href="https://www.kegg.jp/kegg-bin/show_pathway?ko00592">https://www.kegg.jp/kegg-bin/show_pathway?ko00592</a> |
| LOC114295484 | 1.410156 | K18857 | ko00592 | ADH1       | alpha-Linolenic acid metabolism | <a href="https://www.genome.jp/dbget-bin/www_bget?ko:K18857">https://www.genome.jp/dbget-bin/www_bget?ko:K18857</a> | <a href="https://www.kegg.jp/kegg-bin/show_pathway?ko00592">https://www.kegg.jp/kegg-bin/show_pathway?ko00592</a> |
| LOC114296765 | 1.362004 | K07513 | ko00592 | ACAA1      | alpha-Linolenic acid metabolism | <a href="https://www.genome.jp/dbget-bin/www_bget?ko:K07513">https://www.genome.jp/dbget-bin/www_bget?ko:K07513</a> | <a href="https://www.kegg.jp/kegg-bin/show_pathway?ko00592">https://www.kegg.jp/kegg-bin/show_pathway?ko00592</a> |
| LOC114284385 | 1.349019 | K01723 | ko00592 | AOS        | alpha-Linolenic acid metabolism | <a href="https://www.genome.jp/dbget-bin/www_bget?ko:K01723">https://www.genome.jp/dbget-bin/www_bget?ko:K01723</a> | <a href="https://www.kegg.jp/kegg-bin/show_pathway?ko00592">https://www.kegg.jp/kegg-bin/show_pathway?ko00592</a> |
| LOC114297089 | 1.243625 | K00454 | ko00592 | LOX2S      | alpha-Linolenic acid metabolism | <a href="https://www.genome.jp/dbget-bin/www_bget?ko:K00454">https://www.genome.jp/dbget-bin/www_bget?ko:K00454</a> | <a href="https://www.kegg.jp/kegg-bin/show_pathway?ko00592">https://www.kegg.jp/kegg-bin/show_pathway?ko00592</a> |
| LOC114299110 | 1.199145 | K05894 | ko00592 | OPR        | alpha-Linolenic acid metabolism | <a href="https://www.genome.jp/dbget-bin/www_bget?ko:K05894">https://www.genome.jp/dbget-bin/www_bget?ko:K05894</a> | <a href="https://www.kegg.jp/kegg-bin/show_pathway?ko00592">https://www.kegg.jp/kegg-bin/show_pathway?ko00592</a> |
| LOC114315234 | 1.139222 | K10526 | ko00592 | OPCL1      | alpha-Linolenic acid metabolism | <a href="https://www.genome.jp/dbget-bin/www_bget?ko:K10526">https://www.genome.jp/dbget-bin/www_bget?ko:K10526</a> | <a href="https://www.kegg.jp/kegg-bin/show_pathway?ko00592">https://www.kegg.jp/kegg-bin/show_pathway?ko00592</a> |
| LOC114295536 | 1.106409 | K18857 | ko00592 | ADH1       | alpha-Linolenic acid metabolism | <a href="https://www.genome.jp/dbget-bin/www_bget?ko:K18857">https://www.genome.jp/dbget-bin/www_bget?ko:K18857</a> | <a href="https://www.kegg.jp/kegg-bin/show_pathway?ko00592">https://www.kegg.jp/kegg-bin/show_pathway?ko00592</a> |

|              |          |        |         |            |                                 |                                                                                                                     |                                                                                                                   |
|--------------|----------|--------|---------|------------|---------------------------------|---------------------------------------------------------------------------------------------------------------------|-------------------------------------------------------------------------------------------------------------------|
| LOC114285352 | 1.069244 | K08241 | ko00592 | E2.1.1.141 | alpha-Linolenic acid metabolism | <a href="https://www.genome.jp/dbget-bin/www_bget?ko:K08241">https://www.genome.jp/dbget-bin/www_bget?ko:K08241</a> | <a href="https://www.kegg.jp/kegg-bin/show_pathway?ko00592">https://www.kegg.jp/kegg-bin/show_pathway?ko00592</a> |
| LOC114288695 | 1.034942 | K14674 | ko00592 | TGL4       | alpha-Linolenic acid metabolism | <a href="https://www.genome.jp/dbget-bin/www_bget?ko:K14674">https://www.genome.jp/dbget-bin/www_bget?ko:K14674</a> | <a href="https://www.kegg.jp/kegg-bin/show_pathway?ko00592">https://www.kegg.jp/kegg-bin/show_pathway?ko00592</a> |
| LOC114305700 | -1.65981 | K07513 | ko00592 | ACAA1      | alpha-Linolenic acid metabolism | <a href="https://www.genome.jp/dbget-bin/www_bget?ko:K07513">https://www.genome.jp/dbget-bin/www_bget?ko:K07513</a> | <a href="https://www.kegg.jp/kegg-bin/show_pathway?ko00592">https://www.kegg.jp/kegg-bin/show_pathway?ko00592</a> |

---
